# Supplementary material for: Next-generation IEDB tools: a platform for epitope prediction and analysis
Source: Nucleic Acids Res. 2024 May 23;52(W1):W526–32. doi: 10.1093/nar/gkae407 (PMC11223806; doi:10.1093/nar/gkae407)
Supplement: gkae407_Supplemental_File [file gkae407_supplemental_file.pdf]

## SUPPLEMENTAL TECHNICAL DETAILS

### Application Architecture and Technology Stack

*Separation of Frontend and Backend.* The operation of the NG Tools is based on the coordination between a variety of components, each of which serves a particular purpose. For instance, the web interface is the main entry point for users but offloads all incoming requests through the API. The API handles requests from both the web interface as well as API users and submits jobs for execution on the high-performance cluster (HPC) backend. There, a custom library executes each of the standalone tools, splitting parallelizable jobs into smaller components before aggregating the individual outputs and posting the results back to the database. All the systems are based upon open-source software and are technologies that are widely used in the field. Here, we describe each of the individual components that make up the NG Tools in a bit more detail.

*Web Interface.* The user-facing frontend interface is implemented as an Angular (1) web app. Angular is an open source, Typescript-based frontend framework that allows us to easily develop, build, and test our frontend code. The framework is led by the Angular Team at Google and by a large community of developers. Using a frontend framework like Angular helps to separate out backend and frontend logic thus helping developers to scale and update their apps more efficiently. Results tables are rendered with DataTables (2), which is a JavaScript library for adding interactive features and optimizing the performance of HTML tables. Using DataTables, we are able to filter and sort thousands of rows that contain multiple columns nearly instantly. The built-in sorting, filtering, and table state functionalities helped us to develop the Pipeline feature so that users can send results as inputs to the next tool in the pipeline. Additional technologies used by the frontend are Bootstrap 5 (3) for styling, D3 (4) for visualizations, and Google Analytics for monitoring usage patterns for users that opt in.

*Python/Django API.* To support both the web application and API users, the Django REST framework (5) was used to build out the backend system. By serving as a common interface for all predictions, we are able to ensure a consistent experience for all users, regardless of which method is used to submit a request. The Django REST framework adheres to RESTful principles,

offering a standardized approach for interacting with the NG Tools through HTTP methods (e.g., GET, POST). The body of each request and their responses, both formatted as JSON, aim to be consistent across all endpoints. Upon submission of a request, initial validations are run to ensure the data are formatted properly and all required fields are present. If this validation fails, the caller will receive a response that includes an actionable error message. As requests pass validation, the submitted data structures are automatically serialized into JSON representations, keyed with a request ID, and stored in a centralized database. The Django REST framework also supports authentication and authorization through OAuth2. Although API users will never need to provide credentials, these capabilities are used internally to prevent unauthorized users from accessing restricted endpoints. All of the endpoints are documented for end users using the drf-yasg (6) package to produce an OpenAPI 2.0 document that is served through Swagger UI.

The entire backend is supported by a Postgres database that is managed through Django's Object-Relational Mapper (ORM). The system is built around the concept of 'objects', which are stored in the 'object' table. A variety of object types are currently supported, including 'peptide list', 'protein list', and 'results table'. Each object can be linked to one or more requests / predictions and undergoes object-specific validation.

*High Performance Compute Cluster Backend.* An HPC, composed of 10 nodes, each with 24 cores and 72GB of memory supports all computation. It is configured with the Slurm scheduling software (7) and a common filesystem. Jobs are sent to this system by the NG API server through the Slurm REST API. Once received, a custom module will pull all needed inputs to run the job and employ the standalone tools to break them up into atomic units, submit for execution, and aggregate results.

## **Testing and Quality Assurance**

For the NG Tools project, tests are widely used to help identify and fix errors, improve code quality, and ensure that the end product meets the requirements and expectations of the users.

Unit tests are used to check small components to ensure functionality. Django also provides a test-execution framework and assorted utilities that allow us to test at a higher level by simulating requests, inserting test data, and inspecting the application's output. End-to-end tests are automated with Playwright (8), which is a cross-platform web test automation library and is used to test the IEDB NG Tools web and API interfaces. All the different levels of testing were integrated with GitLab CI/CD (9). The testing and its automation aid in discovering issues before they make their way to our production systems.

In addition to code testing, we validated that we were able to obtain identical results between the two sites for all tools that are in common (Supplemental Table 2). The test datasets for each method are listed below. In all cases, default settings were used and outputs are reported in a supplemental spreadsheet. Of the 14 methods tested, 11 matched exactly between the two sites. The remaining 3 (Comblib\_Sidney2008, MHC-NP, and Basic Processing) differed only very slightly due to rounding differences between the reports produced on the two sites.

## Test datasets

Binding and elution test input:

>SARS Spike protein

MFIFLLFLTTLTSGSDLRCTTFDDVQAPNYTQHTSSMRGVYYPDEIFRSDTLYLTLQDLFL  
PFYSNVTGFHTINHTFGNPVIFPKDGIYFAATEKSNVVRGWVFGSTMNNKSQSVIIINNS  
TNVVIRACNFELCDNPFFAVSKPMGTQTHMTIFDNAFNCTFEYISDAFSLDVSEKSGNFK  
HLREFVFKNKDGLYVYKGYQPIDVVRDLPSGFNTLKPIFKLPLGINITNFRAILTAFSP  
AQDIWGTSAAYFVGYLKPTTFMLKYDENGTTITDAVDCSQNPLAELKCSVKSFEIDKGIY  
QTSNFRVVPBGDVVRFPNITNLCPFGEVFNATKFPVYAWERKKISNCVADYSVLYNSTF  
FSTFKCYGVSATKLNLCFSNVYADSFVVKGDDVRQIAPGQTGVIADYNYKLPDDFMGCV  
LAWNTRNIDATSTGNYNKYRYLRHGKLRPFERDISNVPFSPDGKPCTPPALNCYWPLND  
YGFYTTTGIGYQPYRVVLSFELLNAPATVCGPKLSTDLIKNQCVNFNFNGLTGTGVLT  
SSKRFQPFQFGRDVSDFTDSVRDPKTSEILDISPCSFGGVSVITPGTNASSEVAVLYQD  
VNCTDVSTAIHADQLTPAWRIYSTGNNVFQTQAGCLIGAHEVDTSYECDIPIGAGICASY  
HTVSLLRSTSQKSIVAYTMSLGADSSIAYSNNTIAIPTNFSISITTEVMPVSMAKTSVDC  
NMYICGDSTECANLLQYGSFCTQLNRALSGIAAEQDRNTREVFAQVKQMYKTPTLKYFG  
GFNFSQILPDPLKPTKRSFIEDLLFNKVTLDAGFMKQYGECLGDINARDLICAQKFNGL  
TVLPPLLTDDMIAAYTAALVSGTATAGWTFGAGAALQIPFAMQMAYRFNGIGVTQNVLYE  
NQKQIANQFNKAISQIQESLTTTSTALGKLQDVVNQNAQALNTLVKQLSSNFGAISSVLN  
DILSRDLKVEAEVQIDRLITGRLQSLQTYVTQQLIRAAEIRASANLAATKMSECVLGQSK  
RVDFCGKGYHLMSFPQAAPHGVVFLHVTYVPSQERNFTTAPAICHEGKAYFPREGVFVFN  
GTSWFITQRNFFSPQIITDNTFVSGNCDVIGIINNTVYDPLQPELDSFKEELDKEYFKN  
HTSPDVLGDISGINASVVNIQKEIDRLNEVAKNLNESLIDLQELGKYEQYIKWPWYVWL  
GFIAGLIAIVMVTILCCMTSCCSCCLKGACSCGSCCKFDEDDSEPVKGVKLHYT

### Immunogenicity test input:

FIAGLIAIV  
LITGRLQSL  
RLNEVAKNL  
KAVYNFATC  
FQPQNGQFI

### Cluster test input:

>Mus Pep1  
LEQIHVLENSLVL  
>Mus Pep2  
FVEHIHVLENSLAFK  
>Mus Pep3  
GLYGREPDLSSDIKERFA  
>Mus Pep4  
EWFSILLASDKREKI  
>Mus Pep5  
DGFNTFTILKTDYDN  
>Mus Pep6  
NEKDGETFQLMGLY  
>Mus Pep7  
YGREPDLSLDIKEK  
>Mus Pep8  
LENSLVLKFHTVRDE  
>Mus Pep9  
AHLINEKDGETFQLM  
>Mus Pep10  
EEASSTGRNFNVQKINGEWHTIIL  
>Mus Pep11  
EKALVSSVRQRMKCS  
>Mus Pep12  
SRPFIFQEVIDLGGE  
>Mus Pep13  
NVEKINGEWHTIIL  
>Mus Pep14  
GIYYLNYDGFNTFTI  
>Mus Pep15  
DDVVASEALNSVWSGF  
>Mus Pep16  
GSMRVFVEHIHVLEN  
>Mus Pep17  
ENIIDLTKTNRCLKA  
>Mus Pep18  
ILGKLVKDYHLQFHR  
>Mus Pep19  
IGGPDDGVITPWQSSF  
>Mus Pep20  
DKETLSLEELKALLL  
>Mus Pep21  
LQSGFYSSLVTVP

```
>Mus Pep22
EELRRLAPITSDPTE
>Mus Pep23
TIFISLFLLSVCYSA
>Rat Pep1
ASNKREKIEENGSMRVFMQH
>Rat Pep2
DIKEKFAKLCEAHGITRDNI
>Rat Pep3
EEASSTRGNLDVAKLNGDWF
>Rat Pep4
EENGSMRVFMQHIDVLENSL
>Rat Pep5
ENSLGFKFRIKENGECRELY
>Rat Pep6
FMQHIDVLENSLGFKFRIKE
>Rat Pep7
FVEYDGGNTFTILKTDYDRY
>Rat Pep8
GDWFSIVVASNKREKIEENG
>Rat Pep9
GRTKDLSSDIKEKFAKLCEA
>Rat Pep10
KTPEDGEYFVEYDGGNTFTI
>Rat Pep11
LCEAHGITRDNIIDLTKTDR
>Rat Pep12
LINFKNGETFQLMVLYGR TK
>Rat Pep13
NLDVAKLNGDWFSIVVASNK
>Rat Pep14
RDNIIDLTKTDRCLQARG
>Rat Pep15
RELYLVAYKTPEDGEYFVEY
>Rat Pep16
RIKENGECRELYLVAYKTPE
>Rat Pep17
TFQLMVLYGR TKDLSSDIKE
>Rat Pep18
TFTILKTDYDRYVMFHLINE
>Rat Pep19
YDRYVMFHLINEFKNGETFQL
```

## References

1. Angular Development Team Angular.
2. DataTables Development Team DataTables.

3. Bootstrap Development Team Bootstrap.

4. D3 Development Team D3.

5. Django REST Framework Development Team Django REST Framework.

6. drf-yasg Development Team drf-yasg.

7. Jette,M.A. and Wickberg,T. (2023) Architecture of the Slurm Workload Manager. *Lecture Notes in Computer Science (including subseries Lecture Notes in Artificial Intelligence and Lecture Notes in Bioinformatics)*, **14283 LNCS**, 3–23.

[https://doi.org/10.1007/978-3-031-43943-8\\_1/FIGURES/6](https://doi.org/10.1007/978-3-031-43943-8_1/FIGURES/6)

8. Playwright Development Team Playwright.

9. Gitlab Development Team Gitlab.

## SUPPLEMENTAL TABLES

**Supplemental Table 1.** Minimum number of clicks to run the example data through each of the tools that are common between the legacy and NG websites.

| Tool                     | Legacy clicks | NG clicks | Net difference |
|--------------------------|---------------|-----------|----------------|
| MHC I binding/elution    | 7             | 1         | -6             |
| MHC I processing         | 7             | 3         | -4             |
| NetChop/NetCTL/NetCTLPan | 3             | 5         | 2              |
| MHC-NP                   | 7             | 3         | -4             |
| Immunogenicity           | 3             | 3         | 0              |
| Cluster                  | 5             | 1         | -4             |
| median                   | 6             | 3         | -4             |

**Supplemental Table 2** (on following pages). Validating consistency in results between the legacy and NG sites. Results from running the test datasets through each of the 14 methods on both the legacy and NG sites are included in this multi-schema table. In addition to the method outputs, columns are added that compare the values between the two result sets. For 11 of the 14 methods, the values are exactly equivalent. For the remaining 3 (Comblib\_Sidney2008, MHC-NP, and Basic Processing) some of the values differ very slightly due to rounding differences between the reporting formats.

| seq # | peptide    | start | end  | peptide length | allele      | peptide index | median binding | netmhcan_el | netmhcan_el | netmhcan_el | netmhcan_el | legacy score | legacy rank | scores equal | percentiles equal |
|-------|------------|-------|------|----------------|-------------|---------------|----------------|-------------|-------------|-------------|-------------|--------------|-------------|--------------|-------------------|
| 1     | VLNILSLR   | 958   | 966  | 9              | HLA-A*02:01 | 958           | 0.03           | VLNIDLSRL   | VLNIDLSRL   | 0.938498    | 0.03        | 0.938498     | 0.03        | TRUE         | TRUE              |
| 1     | YKPTTFMFL  | 256   | 264  | 9              | HLA-A*02:01 | 256           | 0.03           | YKPTTFMFL   | YKPTTFMFL   | 0.925604    | 0.03        | 0.925604     | 0.03        | TRUE         | TRUE              |
| 1     | RLOSQTVV   | 982   | 990  | 9              | HLA-A*02:01 | 982           | 0.05           | RLOSQTVV    | RLOSQTVV    | 0.87376     | 0.05        | 0.87376      | 0.05        | TRUE         | TRUE              |
| 1     | RLDKVEAEV  | 965   | 973  | 9              | HLA-A*02:01 | 965           | 0.06           | RLDKVEAEV   | RLDKVEAEV   | 0.825045    | 0.06        | 0.825045     | 0.06        | TRUE         | TRUE              |
| 1     | LLFNKVTLA  | 803   | 811  | 9              | HLA-A*02:01 | 803           | 0.08           | LLFNKVTLA   | LLFNKVTLA   | 0.803506    | 0.08        | 0.803506     | 0.08        | TRUE         | TRUE              |
| 1     | VIADYNYKL  | 404   | 412  | 9              | HLA-A*02:01 | 404           | 0.09           | VIADYNYKL   | VIADYNYKL   | 0.77259     | 0.09        | 0.77259      | 0.09        | TRUE         | TRUE              |
| 1     | VVFVHVTVV  | 1042  | 1050 | 9              | HLA-A*02:01 | 1042          | 0.11           | VVFVHVTVV   | VVFVHVTVV   | 0.74167     | 0.11        | 0.74167      | 0.11        | TRUE         | TRUE              |
| 1     | VLYENQKQI  | 897   | 905  | 9              | HLA-A*02:01 | 897           | 0.13           | VLYENQKQI   | VLYENQKQI   | 0.698692    | 0.13        | 0.698692     | 0.13        | TRUE         | TRUE              |
| 1     | HLMSFPQAA  | 1030  | 1038 | 9              | HLA-A*02:01 | 1030          | 0.13           | HLMSFPQAA   | HLMSFPQAA   | 0.693337    | 0.13        | 0.693337     | 0.13        | TRUE         | TRUE              |
| 1     | KQMYKTPTL  | 768   | 776  | 9              | HLA-A*02:01 | 768           | 0.14           | KQMYKTPTL   | KQMYKTPTL   | 0.679794    | 0.14        | 0.679794     | 0.14        | TRUE         | TRUE              |
| 1     | ALNTLVKQL  | 940   | 948  | 9              | HLA-A*02:01 | 940           | 0.16           | ALNTLVKQL   | ALNTLVKQL   | 0.657403    | 0.16        | 0.657403     | 0.16        | TRUE         | TRUE              |
| 1     | RLNEVAKNL  | 1167  | 1175 | 9              | HLA-A*02:01 | 1167          | 0.16           | RLNEVAKNL   | RLNEVAKNL   | 0.652653    | 0.16        | 0.652653     | 0.16        | TRUE         | TRUE              |
| 1     | FIAGLIAIV  | 1202  | 1210 | 9              | HLA-A*02:01 | 1202          | 0.17           | FIAGLIAIV   | FIAGLIAIV   | 0.641405    | 0.17        | 0.641405     | 0.17        | TRUE         | TRUE              |
| 1     | GLTVLPPLL  | 839   | 847  | 9              | HLA-A*02:01 | 839           | 0.18           | GLTVLPPLL   | GLTVLPPLL   | 0.622173    | 0.18        | 0.622173     | 0.18        | TRUE         | TRUE              |
| 1     | NLNESLIDL  | 1174  | 1182 | 9              | HLA-A*02:01 | 1174          | 0.18           | NLNESLIDL   | NLNESLIDL   | 0.618877    | 0.18        | 0.618877     | 0.18        | TRUE         | TRUE              |
| 1     | ALVSGTATA  | 858   | 866  | 9              | HLA-A*02:01 | 858           | 0.26           | ALVSGTATA   | ALVSGTATA   | 0.492248    | 0.26        | 0.492248     | 0.26        | TRUE         | TRUE              |
| 1     | FSISITTEV  | 700   | 708  | 9              | HLA-A*02:01 | 700           | 0.27           | FSISITTEV   | FSISITTEV   | 0.490881    | 0.27        | 0.490881     | 0.27        | TRUE         | TRUE              |
| 1     | TMNNKQSGV  | 106   | 114  | 9              | HLA-A*02:01 | 106           | 0.27           | TMNNKQSGV   | TMNNKQSGV   | 0.484911    | 0.27        | 0.484911     | 0.27        | TRUE         | TRUE              |
| 1     | LLTDDMIAA  | 846   | 854  | 9              | HLA-A*02:01 | 846           | 0.32           | LLTDDMIAA   | LLTDDMIAA   | 0.443474    | 0.32        | 0.443474     | 0.32        | TRUE         | TRUE              |
| 1     | KLPDFMGFC  | 411   | 419  | 9              | HLA-A*02:01 | 411           | 0.35           | KLPDFMGFC   | KLPDFMGFC   | 0.408859    | 0.35        | 0.408859     | 0.35        | TRUE         | TRUE              |
| 1     | ELNAPATV   | 502   | 510  | 9              | HLA-A*02:01 | 502           | 0.44           | ELNAPATV    | ELNAPATV    | 0.355502    | 0.44        | 0.355502     | 0.44        | TRUE         | TRUE              |
| 1     | QIAPGQTGV  | 396   | 404  | 9              | HLA-A*02:01 | 396           | 0.44           | QIAPGQTGV   | QIAPGQTGV   | 0.353593    | 0.44        | 0.353593     | 0.44        | TRUE         | TRUE              |
| 1     | HIINNSTNV  | 115   | 123  | 9              | HLA-A*02:01 | 115           | 0.48           | HIINNSTNV   | HIINNSTNV   | 0.335589    | 0.48        | 0.335589     | 0.48        | TRUE         | TRUE              |
| 1     | SIVAYTMSL  | 673   | 681  | 9              | HLA-A*02:01 | 673           | 0.5            | SIVAYTMSL   | SIVAYTMSL   | 0.325955    | 0.5         | 0.325955     | 0.5         | TRUE         | TRUE              |
| 1     | AIISOQIESL | 912   | 920  | 9              | HLA-A*02:01 | 912           | 0.58           | AIISOQIESL  | AIISOQIESL  | 0.280929    | 0.58        | 0.280929     | 0.58        | TRUE         | TRUE              |
| 1     | VLSEFLLNA  | 498   | 506  | 9              | HLA-A*02:01 | 498           | 0.61           | VLSEFLLNA   | VLSEFLLNA   | 0.268326    | 0.61        | 0.268326     | 0.61        | TRUE         | TRUE              |
| 1     | SLTTTSTAL  | 919   | 927  | 9              | HLA-A*02:01 | 919           | 0.61           | SLTTTSTAL   | SLTTTSTAL   | 0.26725     | 0.61        | 0.26725      | 0.61        | TRUE         | TRUE              |
| 1     | VYVKGYOPI  | 195   | 203  | 9              | HLA-A*02:01 | 195           | 0.68           | VYVKGYOPI   | VYVKGYOPI   | 0.235587    | 0.68        | 0.235587     | 0.68        | TRUE         | TRUE              |
| 1     | MAAYTAAL   | 851   | 859  | 9              | HLA-A*02:01 | 851           | 0.68           | MAAYTAAL    | MAAYTAAL    | 0.234789    | 0.68        | 0.234789     | 0.68        | TRUE         | TRUE              |
| 1     | NYVADSFVV  | 381   | 389  | 9              | HLA-A*02:01 | 381           | 0.74           | NYVADSFVV   | NYVADSFVV   | 0.215408    | 0.74        | 0.215408     | 0.74        | TRUE         | TRUE              |
| 1     | RYVSTGNVV  | 620   | 628  | 9              | HLA-A*02:01 | 620           | 0.75           | RYVSTGNVV   | RYVSTGNVV   | 0.21518     | 0.75        | 0.21518      | 0.75        | TRUE         | TRUE              |
| 1     | SITTEVMPV  | 703   | 711  | 9              | HLA-A*02:01 | 703           | 0.75           | SITTEVMPV   | SITTEVMPV   | 0.214767    | 0.75        | 0.214767     | 0.75        | TRUE         | TRUE              |
| 1     | NTLKPFIKL  | 214   | 222  | 9              | HLA-A*02:01 | 214           | 0.75           | NTLKPFIKL   | NTLKPFIKL   | 0.212951    | 0.75        | 0.212951     | 0.75        | TRUE         | TRUE              |
| 1     | VYDPLQPEL  | 1119  | 1127 | 9              | HLA-A*02:01 | 1119          | 0.8            | VYDPLQPEL   | VYDPLQPEL   | 0.196623    | 0.8         | 0.196623     | 0.8         | TRUE         | TRUE              |
| 1     | YQPYRVVVL  | 491   | 499  | 9              | HLA-A*02:01 | 491           | 0.84           | YQPYRVVVL   | YQPYRVVVL   | 0.189014    | 0.84        | 0.189014     | 0.84        | TRUE         | TRUE              |
| 1     | ALGKLQDQV  | 926   | 934  | 9              | HLA-A*02:01 | 926           | 0.91           | ALGKLQDQV   | ALGKLQDQV   | 0.173341    | 0.91        | 0.173341     | 0.91        | TRUE         | TRUE              |
| 1     | LQIPFAMQM  | 876   | 884  | 9              | HLA-A*02:01 | 876           | 0.99           | LQIPFAMQM   | LQIPFAMQM   | 0.157345    | 0.99        | 0.157345     | 0.99        | TRUE         | TRUE              |
| 1     | ELDSFKEEL  | 1126  | 1134 | 9              | HLA-A*02:01 | 1126          | 1.1            | ELDSFKEEL   | ELDSFKEEL   | 0.14897     | 1.1         | 0.14897      | 1.1         | TRUE         | TRUE              |
| 1     | ILPDPLKPT  | 787   | 795  | 9              | HLA-A*02:01 | 787           | 1.1            | ILPDPLKPT   | ILPDPLKPT   | 0.142014    | 1.1         | 0.142014     | 1.1         | TRUE         | TRUE              |
| 1     | FMKQYGECL  | 815   | 823  | 9              | HLA-A*02:01 | 815           | 1.1            | FMKQYGECL   | FMKQYGECL   | 0.138019    | 1.1         | 0.138019     | 1.1         | TRUE         | TRUE              |
| 1     | GINASVVNI  | 1153  | 1161 | 9              | HLA-A*02:01 | 1153          | 1.1            | GINASVVNI   | GINASVVNI   | 0.137188    | 1.1         | 0.137188     | 1.1         | TRUE         | TRUE              |
| 1     | GIGQYQYRV  | 488   | 496  | 9              | HLA-A*02:01 | 488           | 1.2            | GIGQYQYRV   | GIGQYQYRV   | 0.133399    | 1.2         | 0.133399     | 1.2         | TRUE         | TRUE              |
| 1     | ILDISPCSF  | 570   | 578  | 9              | HLA-A*02:01 | 570           | 1.3            | ILDISPCSF   | ILDISPCSF   | 0.112157    | 1.3         | 0.112157     | 1.3         | TRUE         | TRUE              |
| 1     | VLVQDVNCT  | 596   | 604  | 9              | HLA-A*02:01 | 596           | 1.3            | VLVQDVNCT   | VLVQDVNCT   | 0.11128     | 1.3         | 0.11128      | 1.3         | TRUE         | TRUE              |
| 1     | MIFDNAFNC  | 151   | 159  | 9              | HLA-A*02:01 | 151           | 1.4            | MIFDNAFNC   | MIFDNAFNC   | 0.103791    | 1.4         | 0.103791     | 1.4         | TRUE         | TRUE              |
| 1     | ELCDNPFFA  | 131   | 139  | 9              | HLA-A*02:01 | 131           | 1.4            | ELCDNPFFA   | ELCDNPFFA   | 0.101191    | 1.4         | 0.101191     | 1.4         | TRUE         | TRUE              |
| 1     | VIGIINNTV  | 1111  | 1119 | 9              | HLA-A*02:01 | 1111          | 1.4            | VIGIINNTV   | VIGIINNTV   | 0.100297    | 1.4         | 0.100297     | 1.4         | TRUE         | TRUE              |
| 1     | LITGRLOSL  | 978   | 986  | 9              | HLA-A*02:01 | 978           | 1.4            | LITGRLOSL   | LITGRLOSL   | 0.098152    | 1.4         | 0.098152     | 1.4         | TRUE         | TRUE              |
| 1     | VLVNSTFFS  | 354   | 362  | 9              | HLA-A*02:01 | 354           | 1.4            | VLVNSTFFS   | VLVNSTFFS   | 0.097551    | 1.4         | 0.097551     | 1.4         | TRUE         | TRUE              |
| 1     | GICASYHTV  | 655   | 663  | 9              | HLA-A*02:01 | 655           | 1.5            | GICASYHTV   | GICASYHTV   | 0.094521    | 1.5         | 0.094521     | 1.5         | TRUE         | TRUE              |
| 1     | YVTQQLIRA  | 989   | 997  | 9              | HLA-A*02:01 | 989           | 1.5            | YVTQQLIRA   | YVTQQLIRA   | 0.091708    | 1.5         | 0.091708     | 1.5         | TRUE         | TRUE              |
| 1     | IITDNTFTV  | 1096  | 1104 | 9              | HLA-A*02:01 | 1096          | 1.5            | IITDNTFTV   | IITDNTFTV   | 0.088901    | 1.5         | 0.088901     | 1.5         | TRUE         | TRUE              |
| 1     | KEIDRLNEV  | 1163  | 1171 | 9              | HLA-A*02:01 | 1163          | 1.5            | KEIDRLNEV   | KEIDRLNEV   | 0.087213    | 1.5         | 0.087213     | 1.5         | TRUE         | TRUE              |
| 1     | ATAGWTFGA  | 864   | 872  | 9              | HLA-A*02:01 | 864           | 1.5            | ATAGWTFGA   | ATAGWTFGA   | 0.086897    | 1.5         | 0.086897     | 1.5         | TRUE         | TRUE              |
| 1     | YQTSNFRVV  | 300   | 308  | 9              | HLA-A*02:01 | 300           | 1.6            | YQTSNFRVV   | YQTSNFRVV   | 0.08234     | 1.6         | 0.08234      | 1.6         | TRUE         | TRUE              |
| 1     | LQTVYVQQQL | 986   | 994  | 9              | HLA-A*02:01 | 986           | 1.6            | LQTVYVQQQL  | LQTVYVQQQL  | 0.077489    | 1.6         | 0.077489     | 1.6         | TRUE         | TRUE              |
| 1     | GLIAVMYMT  | 1205  | 1213 | 9              | HLA-A*02:01 | 1205          | 1.6            | GLIAVMYMT   | GLIAVMYMT   | 0.076364    | 1.6         | 0.076364     | 1.6         | TRUE         | TRUE              |
| 1     | FILFLTLTL  | 2     | 10   | 9              | HLA-A*02:01 | 2             | 1.6            | FILFLTLTL   | FILFLTLTL   | 0.07501     | 1.6         | 0.07501      | 1.6         | TRUE         | TRUE              |
| 1     | PLAEKCSV   | 282   | 290  | 9              | HLA-A*02:01 | 282           | 1.7            | PLAEKCSV    | PLAEKCSV    | 0.074482    | 1.7         | 0.074482     | 1.7         | TRUE         | TRUE              |
| 1     | FNATKPSV   | 329   | 337  | 9              | HLA-A*02:01 | 329           | 1.7            | FNATKPSV    | FNATKPSV    | 0.071268    | 1.7         | 0.071268     | 1.7         | TRUE         | TRUE              |
| 1     | IAIPTNESI  | 694   | 702  | 9              | HLA-A*02:01 | 694           | 1.8            | IAIPTNESI   | IAIPTNESI   | 0.065559    | 1.8         | 0.065559     | 1.8         | TRUE         | TRUE              |
| 1     | VLAWNTRNI  | 420   | 428  | 9              | HLA-A*02:01 | 420           | 1.9            | VLAWNTRNI   | VLAWNTRNI   | 0.058034    | 1.9         | 0.058034     | 1.9         | TRUE         | TRUE              |
| 1     | RVVLSFEL   | 495   | 503  | 9              | HLA-A*02:01 | 495           | 1.9            | RVVLSFEL    | RVVLSFEL    | 0.057848    | 1.9         | 0.057848     | 1.9         | TRUE         | TRUE              |
| 1     | QYIKWPVVY  | 1190  | 1198 | 9              | HLA-A*02:01 | 1190          | 2              | QYIKWPVVY   | QYIKWPVVY   | 0.056776    | 2           | 0.056776     | 2           | TRUE         | TRUE              |
| 1     | HIINNSTNV  | 116   | 124  | 9              | HLA-A*02:01 | 116           | 2.1            | HIINNSTNV   | HIINNSTNV   | 0.051177    | 2.1         | 0.051177     | 2.1         | TRUE         | TRUE              |
| 1     | YQDVNCTDV  | 598   | 606  | 9              | HLA-A*02:01 | 598           | 2.1            | YQDVNCTDV   | YQDVNCTDV   | 0.048786    | 2.1         | 0.048786     | 2.1         | TRUE         | TRUE              |
| 1     | AIVMVTILL  | 1208  | 1216 | 9              | HLA-A*02:01 | 1208          | 2.2            | AIVMVTILL   | AIVMVTILL   | 0.047718    | 2.2         | 0.047718     | 2.2         | TRUE         | TRUE              |
| 1     | AISSVLNDI  | 954   | 962  | 9              | HLA-A*02:01 | 954           | 2.2            | AISSVLNDI   | AISSVLNDI   | 0.046737    | 2.2         | 0.046737     | 2.2         | TRUE         | TRUE              |
| 1     | FVSGNCDVV  | 1103  | 1111 | 9              | HLA-A*02:01 | 1103          | 2.2            | FVSGNCDVV   | FVSGNCDVV   | 0.046521    | 2.2         | 0.046521     | 2.2         | TRUE         | TRUE              |
| 1     | FLFLTLTSL  | 4     | 12   | 9              | HLA-A*02:01 | 4             | 2.2            | FLFLTLTSL   | FLFLTLTSL   | 0.046034    | 2.2         | 0.046034     | 2.2         | TRUE         | TRUE              |
| 1     | TOAGCUGIA  | 631   | 639  | 9              | HLA-A*02:01 | 631           | 2.3            | TOAGCUGIA   | TOAGCUGIA   | 0.042522    | 2.3         | 0.042522     | 2.3         | TRUE         | TRUE              |
| 1     | AAPHGVVFL  | 1037  | 1045 | 9              | HLA-A*02:01 | 1037          | 2.3            | AAPHGVVFL   | AAPHGVVFL   | 0.042404    | 2.3         | 0.042404     | 2.3         | TRUE         | TRUE              |
| 1     | QLNRALSGL  | 744   | 752  | 9              | HLA-A*02:01 | 744           | 2.4            | QLNRALSGL   | QLNRALSGL   | 0.042058    | 2.4         | 0.042058     | 2.4         | TRUE         | TRUE              |
| 1     | DLPSGFNTL  | 208   | 216  | 9              | HLA-A*02:01 | 208           | 2.4            | DLPSGFNTL   | DLPSGFNTL   | 0.042007    | 2.4         | 0.042007     | 2.4         | TRUE         | TRUE              |
| 1     | YLTQDLFLP  | 53    | 61   | 9              | HLA-A*02:01 | 53            | 2.4            | YLTQDLFLP   | YLTQDLFLP   | 0.040783    | 2.4         | 0.040783     | 2.4         | TRUE         | TRUE              |
| 1     | KQLSSNFGA  | 946   | 954  | 9              | HLA-A*02:01 | 946           | 2.5            | KQLSSNFGA   | KQLSSNFGA   | 0.037259    | 2.5         | 0.037259     | 2.5         | TRUE         | TRUE              |
| 1     | TALGKLQDV  | 925   | 933  | 9              | HLA-A*02:01 | 925           | 2.6            | TALGKLQDV   | TALGKLQDV   | 0.036029    | 2.6         | 0.036029     | 2.6         | TRUE         | TRUE              |
| 1     | NTRVFQAQV  | 759   | 767  | 9              | HLA-A*02:01 | 759           | 2.6            | NTRVFQAQV   | NTRVFQAQV   | 0.035739    | 2.6         | 0.035739     | 2.6         | TRUE         | TRUE              |
| 1     | AQKFNGLTV  | 834   | 842  | 9              | HLA-A*02:01 | 834           | 2.6            | AQKFNGLTV   | AQKFNGLTV   | 0.035721    | 2.6         | 0.035721     | 2.6         | TRUE         | TRUE              |
| 1     | GTSAAAYFV  | 246   | 254  | 9              | HLA-A*02:01 | 246           | 2.6            | GTSAAAYFV   | GTSAAAYFV   | 0.03495     | 2.6         | 0.03495      | 2.6         | TRUE         | TRUE              |
| 1     | DLFLNKVTL  | 802   | 810  | 9              | HLA-A*02:01 | 802           | 2.6            | DLFLNKVTL   | DLFLNKVTL   | 0.034579    | 2.6         | 0.034579     | 2.6         | TRUE         | TRUE              |
| 1     | FLPFYSNVT  | 59    | 67   | 9              | HLA-A*02:01 | 59            | 2.7            | FLPFYSNVT   | FLPFYSNVT   | 0.032313    | 2.7         | 0.032313     | 2.7         | TRUE         | TRUE              |
|       |            |       |      |                |             |               |                |             |             |             |             |              |             |              |                   |

| seq # | peptide    | start | end  | peptide length | allele      | peptide index | median binding | netmhcpan_el | netmhcpan_el | netmhcpan_el | netmhcpan_el | legacy score | legacy rank | scores equal | percentiles equal |
|-------|------------|-------|------|----------------|-------------|---------------|----------------|--------------|--------------|--------------|--------------|--------------|-------------|--------------|-------------------|
| 1     | KNKDGFLVY  | 188   | 196  | 9              | HLA-A*02:01 | 188           | 4.0            | KNKDGFLVY    | KNKDGFLVY    | 0.015334     | 4            | 0.015334     | 4           | TRUE         | TRUE              |
| 1     | LNAPATVC   | 503   | 511  | 9              | HLA-A*02:01 | 503           | 4.2            | LNAPATVC     | LNAPATVC     | 0.014064     | 4.2          | 0.014064     | 4.2         | TRUE         | TRUE              |
| 1     | LFLPFSYNV  | 58    | 66   | 9              | HLA-A*02:01 | 58            | 4.4            | LFLPFSYNV    | LFLPFSYNV    | 0.013126     | 4.4          | 0.013126     | 4.4         | TRUE         | TRUE              |
| 1     | QIQESLTTT  | 915   | 923  | 9              | HLA-A*02:01 | 915           | 4.4            | QIQESLTTT    | QIQESLTTT    | 0.012978     | 4.4          | 0.012978     | 4.4         | TRUE         | TRUE              |
| 1     | VIRACNFEL  | 124   | 132  | 9              | HLA-A*02:01 | 124           | 4.4            | VIRACNFEL    | VIRACNFEL    | 0.01275      | 4.4          | 0.01275      | 4.4         | TRUE         | TRUE              |
| 1     | NGIGVTQNV  | 889   | 897  | 9              | HLA-A*02:01 | 889           | 4.5            | NGIGVTQNV    | NGIGVTQNV    | 0.012498     | 4.5          | 0.012498     | 4.5         | TRUE         | TRUE              |
| 1     | GLTGTGVLV  | 531   | 539  | 9              | HLA-A*02:01 | 531           | 4.5            | GLTGTGVLV    | GLTGTGVLV    | 0.012351     | 4.5          | 0.012351     | 4.5         | TRUE         | TRUE              |
| 1     | GAALQIPFA  | 873   | 881  | 9              | HLA-A*02:01 | 873           | 4.5            | GAALQIPFA    | GAALQIPFA    | 0.012319     | 4.5          | 0.012319     | 4.5         | TRUE         | TRUE              |
| 1     | FAATEKSNV  | 89    | 97   | 9              | HLA-A*02:01 | 89            | 4.6            | FAATEKSNV    | FAATEKSNV    | 0.011666     | 4.6          | 0.011666     | 4.6         | TRUE         | TRUE              |
| 1     | AVDCSQNPL  | 275   | 283  | 9              | HLA-A*02:01 | 275           | 4.6            | AVDCSQNPL    | AVDCSQNPL    | 0.01155      | 4.6          | 0.01155      | 4.6         | TRUE         | TRUE              |
| 1     | SQKSIVAYT  | 670   | 678  | 9              | HLA-A*02:01 | 670           | 4.7            | SQKSIVAYT    | SQKSIVAYT    | 0.011395     | 4.7          | 0.011395     | 4.7         | TRUE         | TRUE              |
| 1     | NLCPFGEVF  | 321   | 329  | 9              | HLA-A*02:01 | 321           | 4.7            | NLCPFGEVF    | NLCPFGEVF    | 0.011141     | 4.7          | 0.011141     | 4.7         | TRUE         | TRUE              |
| 1     | CTFEYISDA  | 159   | 167  | 9              | HLA-A*02:01 | 159           | 4.8            | CTFEYISDA    | CTFEYISDA    | 0.010949     | 4.8          | 0.010949     | 4.8         | TRUE         | TRUE              |
| 1     | KSFEIDKGI  | 291   | 299  | 9              | HLA-A*02:01 | 291           | 4.8            | KSFEIDKGI    | KSFEIDKGI    | 0.01088      | 4.8          | 0.01088      | 4.8         | TRUE         | TRUE              |
| 1     | QIANQFNKA  | 904   | 912  | 9              | HLA-A*02:01 | 904           | 4.8            | QIANQFNKA    | QIANQFNKA    | 0.010863     | 4.8          | 0.010863     | 4.8         | TRUE         | TRUE              |
| 1     | QLSSNFGAI  | 947   | 955  | 9              | HLA-A*02:01 | 947           | 4.8            | QLSSNFGAI    | QLSSNFGAI    | 0.010857     | 4.8          | 0.010857     | 4.8         | TRUE         | TRUE              |
| 1     | ACQVKQMVK  | 765   | 773  | 9              | HLA-A*02:01 | 765           | 4.9            | ACQVKQMVK    | ACQVKQMVK    | 0.010562     | 4.9          | 0.010562     | 4.9         | TRUE         | TRUE              |
| 1     | SMAKTSVDC  | 712   | 720  | 9              | HLA-A*02:01 | 712           | 4.9            | SMAKTSVDC    | SMAKTSVDC    | 0.01046      | 4.9          | 0.01046      | 4.9         | TRUE         | TRUE              |
| 1     | TLKPFIKLP  | 215   | 223  | 9              | HLA-A*02:01 | 215           | 4.9            | TLKPFIKLP    | TLKPFIKLP    | 0.010384     | 4.9          | 0.010384     | 4.9         | TRUE         | TRUE              |
| 1     | QMAVYRNGI  | 883   | 891  | 9              | HLA-A*02:01 | 883           | 4.9            | QMAVYRNGI    | QMAVYRNGI    | 0.010361     | 4.9          | 0.010361     | 4.9         | TRUE         | TRUE              |
| 1     | RAAEIRASA  | 996   | 1004 | 9              | HLA-A*02:01 | 996           | 4.9            | RAAEIRASA    | RAAEIRASA    | 0.010269     | 4.9          | 0.010269     | 4.9         | TRUE         | TRUE              |
| 1     | ISDAFSLDV  | 164   | 172  | 9              | HLA-A*02:01 | 164           | 4.9            | ISDAFSLDV    | ISDAFSLDV    | 0.010108     | 4.9          | 0.010108     | 4.9         | TRUE         | TRUE              |
| 1     | GFIAGLUI   | 1201  | 1209 | 9              | HLA-A*02:01 | 1201          | 5              | GFIAGLUI     | GFIAGLUI     | 0.009798     | 5            | 0.009798     | 5           | TRUE         | TRUE              |
| 1     | ATKPSVYA   | 331   | 339  | 9              | HLA-A*02:01 | 331           | 5              | ATKPSVYA     | ATKPSVYA     | 0.009712     | 5            | 0.009712     | 5           | TRUE         | TRUE              |
| 1     | SLGADSSIA  | 680   | 688  | 9              | HLA-A*02:01 | 680           | 5.1            | SLGADSSIA    | SLGADSSIA    | 0.009616     | 5.1          | 0.009616     | 5.1         | TRUE         | TRUE              |
| 1     | STFSTFKC   | 358   | 366  | 9              | HLA-A*02:01 | 358           | 5.1            | STFSTFKC     | STFSTFKC     | 0.009461     | 5.1          | 0.009461     | 5.1         | TRUE         | TRUE              |
| 1     | RLTGRLOS   | 977   | 985  | 9              | HLA-A*02:01 | 977           | 5.1            | RLTGRLOS     | RLTGRLOS     | 0.009392     | 5.1          | 0.009392     | 5.1         | TRUE         | TRUE              |
| 1     | FQTOAGCU   | 629   | 637  | 9              | HLA-A*02:01 | 629           | 5.1            | FQTOAGCU     | FQTOAGCU     | 0.009382     | 5.1          | 0.009382     | 5.1         | TRUE         | TRUE              |
| 1     | EIDKGIYOT  | 294   | 302  | 9              | HLA-A*02:01 | 294           | 5.3            | EIDKGIYOT    | EIDKGIYOT    | 0.008686     | 5.3          | 0.008686     | 5.3         | TRUE         | TRUE              |
| 1     | PIFKLPLGI  | 218   | 226  | 9              | HLA-A*02:01 | 218           | 5.4            | PIFKLPLGI    | PIFKLPLGI    | 0.008452     | 5.4          | 0.008452     | 5.4         | TRUE         | TRUE              |
| 1     | AAATEKSNV  | 90    | 98   | 9              | HLA-A*02:01 | 90            | 5.4            | AAATEKSNV    | AAATEKSNV    | 0.008385     | 5.4          | 0.008385     | 5.4         | TRUE         | TRUE              |
| 1     | QTVYTQQI   | 987   | 995  | 9              | HLA-A*02:01 | 987           | 5.5            | QTVYTQQI     | QTVYTQQI     | 0.008154     | 5.5          | 0.008154     | 5.5         | TRUE         | TRUE              |
| 1     | YFPRGCVFV  | 1070  | 1078 | 9              | HLA-A*02:01 | 1070          | 5.5            | YFPRGCVFV    | YFPRGCVFV    | 0.008122     | 5.5          | 0.008122     | 5.5         | TRUE         | TRUE              |
| 1     | LTDDMIAAY  | 847   | 855  | 9              | HLA-A*02:01 | 847           | 5.5            | LTDDMIAAY    | LTDDMIAAY    | 0.008033     | 5.5          | 0.008033     | 5.5         | TRUE         | TRUE              |
| 1     | LLQGSFCT   | 735   | 743  | 9              | HLA-A*02:01 | 735           | 5.6            | LLQGSFCT     | LLQGSFCT     | 0.007895     | 5.6          | 0.007895     | 5.6         | TRUE         | TRUE              |
| 1     | IWMVTILLC  | 1209  | 1217 | 9              | HLA-A*02:01 | 1209          | 5.7            | IWMVTILLC    | IWMVTILLC    | 0.007563     | 5.7          | 0.007563     | 5.7         | TRUE         | TRUE              |
| 1     | LQDVVNQNA  | 930   | 938  | 9              | HLA-A*02:01 | 930           | 5.7            | LQDVVNQNA    | LQDVVNQNA    | 0.007548     | 5.7          | 0.007548     | 5.7         | TRUE         | TRUE              |
| 1     | SISITTEVM  | 701   | 709  | 9              | HLA-A*02:01 | 701           | 5.7            | SISITTEVM    | SISITTEVM    | 0.007473     | 5.7          | 0.007473     | 5.7         | TRUE         | TRUE              |
| 1     | IAAYTAALV  | 852   | 860  | 9              | HLA-A*02:01 | 852           | 5.7            | IAAYTAALV    | IAAYTAALV    | 0.007472     | 5.7          | 0.007472     | 5.7         | TRUE         | TRUE              |
| 1     | VWLGFAGL   | 1198  | 1206 | 9              | HLA-A*02:01 | 1198          | 5.7            | VWLGFAGL     | VWLGFAGL     | 0.007452     | 5.7          | 0.007452     | 5.7         | TRUE         | TRUE              |
| 1     | FLHVTYVPS  | 1044  | 1052 | 9              | HLA-A*02:01 | 1044          | 5.8            | FLHVTYVPS    | FLHVTYVPS    | 0.007378     | 5.8          | 0.007378     | 5.8         | TRUE         | TRUE              |
| 1     | SOERNFTTA  | 1052  | 1060 | 9              | HLA-A*02:01 | 1052          | 5.8            | SOERNFTTA    | SOERNFTTA    | 0.007354     | 5.8          | 0.007354     | 5.8         | TRUE         | TRUE              |
| 1     | DQLTPAWRI  | 613   | 621  | 9              | HLA-A*02:01 | 613           | 5.8            | DQLTPAWRI    | DQLTPAWRI    | 0.007329     | 5.8          | 0.007329     | 5.8         | TRUE         | TRUE              |
| 1     | PLNDGYFYT  | 477   | 485  | 9              | HLA-A*02:01 | 477           | 5.8            | PLNDGYFYT    | PLNDGYFYT    | 0.007265     | 5.8          | 0.007265     | 5.8         | TRUE         | TRUE              |
| 1     | HADQLTPAW  | 611   | 619  | 9              | HLA-A*02:01 | 611           | 5.9            | HADQLTPAW    | HADQLTPAW    | 0.007111     | 5.9          | 0.007111     | 5.9         | TRUE         | TRUE              |
| 1     | VRDPKTSIE  | 562   | 570  | 9              | HLA-A*02:01 | 562           | 6              | VRDPKTSIE    | VRDPKTSIE    | 0.006853     | 6            | 0.006853     | 6           | TRUE         | TRUE              |
| 1     | ALSGIAAEQ  | 748   | 756  | 9              | HLA-A*02:01 | 748           | 6.1            | ALSGIAAEQ    | ALSGIAAEQ    | 0.006665     | 6.1          | 0.006665     | 6.1         | TRUE         | TRUE              |
| 1     | FGAGAAQI   | 870   | 878  | 9              | HLA-A*02:01 | 870           | 6.1            | FGAGAAQI     | FGAGAAQI     | 0.006599     | 6.1          | 0.006599     | 6.1         | TRUE         | TRUE              |
| 1     | FPOAAPHG   | 1034  | 1042 | 9              | HLA-A*02:01 | 1034          | 6.1            | FPOAAPHG     | FPOAAPHG     | 0.006584     | 6.1          | 0.006584     | 6.1         | TRUE         | TRUE              |
| 1     | VFNQTSWFI  | 1078  | 1086 | 9              | HLA-A*02:01 | 1078          | 6.1            | VFNQTSWFI    | VFNQTSWFI    | 0.006461     | 6.1          | 0.006461     | 6.1         | TRUE         | TRUE              |
| 1     | CVLGOSKRV  | 1014  | 1022 | 9              | HLA-A*02:01 | 1014          | 6.2            | CVLGOSKRV    | CVLGOSKRV    | 0.006416     | 6.2          | 0.006416     | 6.2         | TRUE         | TRUE              |
| 1     | AGLIAIVMV  | 1204  | 1212 | 9              | HLA-A*02:01 | 1204          | 6.2            | AGLIAIVMV    | AGLIAIVMV    | 0.006388     | 6.2          | 0.006388     | 6.2         | TRUE         | TRUE              |
| 1     | QLQIRAAEI  | 992   | 1000 | 9              | HLA-A*02:01 | 992           | 6.2            | QLQIRAAEI    | QLQIRAAEI    | 0.006297     | 6.2          | 0.006297     | 6.2         | TRUE         | TRUE              |
| 1     | QMKYPTLTK  | 769   | 777  | 9              | HLA-A*02:01 | 769           | 6.2            | QMKYPTLTK    | QMKYPTLTK    | 0.006251     | 6.2          | 0.006251     | 6.2         | TRUE         | TRUE              |
| 1     | IKWPWWYVWL | 1192  | 1200 | 9              | HLA-A*02:01 | 1192          | 6.3            | IKWPWWYVWL   | IKWPWWYVWL   | 0.006196     | 6.3          | 0.006196     | 6.3         | TRUE         | TRUE              |
| 1     | GIGVTQNLV  | 890   | 898  | 9              | HLA-A*02:01 | 890           | 6.3            | GIGVTQNLV    | GIGVTQNLV    | 0.006051     | 6.3          | 0.006051     | 6.3         | TRUE         | TRUE              |
| 1     | TSYECDPI   | 644   | 652  | 9              | HLA-A*02:01 | 644           | 6.4            | TSYECDPI     | TSYECDPI     | 0.005881     | 6.4          | 0.005881     | 6.4         | TRUE         | TRUE              |
| 1     | WIGGSTC    | 723   | 731  | 9              | HLA-A*02:01 | 723           | 6.5            | WIGGSTC      | WIGGSTC      | 0.005754     | 6.5          | 0.005754     | 6.5         | TRUE         | TRUE              |
| 1     | VKGVKYLHY  | 1246  | 1254 | 9              | HLA-A*02:01 | 1246          | 6.5            | VKGVKYLHY    | VKGVKYLHY    | 0.00571      | 6.5          | 0.00571      | 6.5         | TRUE         | TRUE              |
| 1     | AAAYFVGYL  | 249   | 257  | 9              | HLA-A*02:01 | 249           | 6.5            | AAAYFVGYL    | AAAYFVGYL    | 0.005701     | 6.5          | 0.005701     | 6.5         | TRUE         | TRUE              |
| 1     | SLQTYVTQQ  | 985   | 993  | 9              | HLA-A*02:01 | 985           | 6.5            | SLQTYVTQQ    | SLQTYVTQQ    | 0.005645     | 6.5          | 0.005645     | 6.5         | TRUE         | TRUE              |
| 1     | KRFQPFQOF  | 543   | 551  | 9              | HLA-A*02:01 | 543           | 6.5            | KRFQPFQOF    | KRFQPFQOF    | 0.00564      | 6.5          | 0.00564      | 6.5         | TRUE         | TRUE              |
| 1     | IEDLFFNKV  | 800   | 808  | 9              | HLA-A*02:01 | 800           | 6.6            | IEDLFFNKV    | IEDLFFNKV    | 0.005606     | 6.6          | 0.005606     | 6.6         | TRUE         | TRUE              |
| 1     | QILPDPLK   | 786   | 794  | 9              | HLA-A*02:01 | 786           | 6.6            | QILPDPLK     | QILPDPLK     | 0.005526     | 6.6          | 0.005526     | 6.6         | TRUE         | TRUE              |
| 1     | TLADAGFMK  | 809   | 817  | 9              | HLA-A*02:01 | 809           | 6.7            | TLADAGFMK    | TLADAGFMK    | 0.005381     | 6.7          | 0.005381     | 6.7         | TRUE         | TRUE              |
| 1     | TVYDLOPE   | 1118  | 1126 | 9              | HLA-A*02:01 | 1118          | 6.7            | TVYDLOPE     | TVYDLOPE     | 0.005319     | 6.7          | 0.005319     | 6.7         | TRUE         | TRUE              |
| 1     | VMPVSMMAKT | 708   | 716  | 9              | HLA-A*02:01 | 708           | 6.7            | VMPVSMMAKT   | VMPVSMMAKT   | 0.005279     | 6.7          | 0.005279     | 6.7         | TRUE         | TRUE              |
| 1     | FSTFKCYGV  | 361   | 369  | 9              | HLA-A*02:01 | 361           | 6.8            | FSTFKCYGV    | FSTFKCYGV    | 0.005212     | 6.8          | 0.005212     | 6.8         | TRUE         | TRUE              |
| 1     | SVLNDILSR  | 957   | 965  | 9              | HLA-A*02:01 | 957           | 7              | SVLNDILSR    | SVLNDILSR    | 0.004883     | 7            | 0.004883     | 7           | TRUE         | TRUE              |
| 1     | EVFAQVKQM  | 762   | 770  | 9              | HLA-A*02:01 | 762           | 7.1            | EVFAQVKQM    | EVFAQVKQM    | 0.004799     | 7.1          | 0.004799     | 7.1         | TRUE         | TRUE              |
| 1     | LMSFPQAAP  | 1031  | 1039 | 9              | HLA-A*02:01 | 1031          | 7.1            | LMSFPQAAP    | LMSFPQAAP    | 0.004754     | 7.1          | 0.004754     | 7.1         | TRUE         | TRUE              |
| 1     | GINITNFR   | 225   | 233  | 9              | HLA-A*02:01 | 225           | 7.2            | GINITNFR     | GINITNFR     | 0.004651     | 7.2          | 0.004651     | 7.2         | TRUE         | TRUE              |
| 1     | NVFTQAGC   | 627   | 635  | 9              | HLA-A*02:01 | 627           | 7.2            | NVFTQAGC     | NVFTQAGC     | 0.004636     | 7.2          | 0.004636     | 7.2         | TRUE         | TRUE              |
| 1     | STAIHADQL  | 607   | 615  | 9              | HLA-A*02:01 | 607           | 7.2            | STAIHADQL    | STAIHADQL    | 0.004632     | 7.2          | 0.004632     | 7.2         | TRUE         | TRUE              |
| 1     | TSVDCNMVY  | 716   | 724  | 9              | HLA-A*02:01 | 716           | 7.2            | TSVDCNMVY    | TSVDCNMVY    | 0.004583     | 7.2          | 0.004583     | 7.2         | TRUE         | TRUE              |
| 1     | TQDLFLPFY  | 55    | 63   | 9              | HLA-A*02:01 | 55            | 7.2            | TQDLFLPFY    | TQDLFLPFY    | 0.004557     | 7.2          | 0.004557     | 7.2         | TRUE         | TRUE              |
| 1     | QIPFAMQMA  | 877   | 885  | 9              | HLA-A*02:01 | 877           | 7.2            | QIPFAMQMA    | QIPFAMQMA    | 0.004536     | 7.2          | 0.004536     | 7.2         | TRUE         | TRUE              |
| 1     | STSQKSIVA  | 668   | 676  | 9              | HLA-A*02:01 | 668           | 7.2            | STSQKSIVA    | STSQKSIVA    | 0.004525     | 7.2          | 0.004525     | 7.2         | TRUE         | TRUE              |
| 1     | VTQQLIRAA  | 990   | 998  | 9              | HLA-A*02:01 | 990           | 7.3            | VTQQLIRAA    | VTQQLIRAA    | 0.004453     | 7.3          | 0.004453     | 7.3         | TRUE         | TRUE              |
| 1     | GVVYPDEIF  | 39    | 47   | 9              | HLA-A*02:01 | 39            | 7.3            | GVVYPDEIF    | GVVYPDEIF    | 0.004451     | 7.3          | 0.004451     | 7.3         | TRUE         | TRUE              |
| 1     | FVGYLKPTT  | 253   | 261  | 9              | HLA-A*02:01 | 253           | 7.4            | FVGYLKPTT    | FVGYLKPTT    | 0.004349     | 7.4          | 0.004349     | 7.4         | TRUE         | TRUE              |
| 1     | KLQDVVNQN  | 929   | 937  | 9              | HLA-A*02:01 | 929           | 7.4            | KLQDVVNQN    | KLQDVVNQN    | 0.004311     | 7.4          | 0.004311     | 7.4         | TRUE         | TRUE              |
| 1     | YGYFTTTGI  | 481   | 489  | 9              | HLA-A*02:01 | 481           | 7.4            | YGYFTTTGI    | YGYFTTTGI    | 0.004264     | 7.4          | 0.004264     | 7.4         | TRUE</       |                   |

| seq # | peptide    | start | end  | peptide length | allele      | peptide index | median binding | netmhcan_el | netmhcan_el | netmhcan_el | netmhcan_el | legacy score | legacy rank | scores equal | percentiles equal |
|-------|------------|-------|------|----------------|-------------|---------------|----------------|-------------|-------------|-------------|-------------|--------------|-------------|--------------|-------------------|
| 1     | VAKNLNESL  | 1171  | 1179 | 9              | HLA-A*02:01 | 1171          | 8.9            | VAKNLNESL   | VAKNLNESL   | 0.002833    | 8.9         | 0.002833     | 8.9         | TRUE         | TRUE              |
| 1     | INSTNVVIRA | 119   | 127  | 9              | HLA-A*02:01 | 119           | 8.9            | INSTNVVIRA  | INSTNVVIRA  | 0.002821    | 8.9         | 0.002821     | 8.9         | TRUE         | TRUE              |
| 1     | YTAALVSGT  | 855   | 863  | 9              | HLA-A*02:01 | 855           | 9              | YTAALVSGT   | YTAALVSGT   | 0.002786    | 9           | 0.002786     | 9           | TRUE         | TRUE              |
| 1     | QIITDNTF   | 1095  | 1103 | 9              | HLA-A*02:01 | 1095          | 9              | QIITDNTF    | QIITDNTF    | 0.002755    | 9           | 0.002755     | 9           | TRUE         | TRUE              |
| 1     | ICAQKFNGL  | 832   | 840  | 9              | HLA-A*02:01 | 832           | 9              | ICAQKFNGL   | ICAQKFNGL   | 0.002752    | 9           | 0.002752     | 9           | TRUE         | TRUE              |
| 1     | STGNNVFQT  | 623   | 631  | 9              | HLA-A*02:01 | 623           | 9              | STGNNVFQT   | STGNNVFQT   | 0.002738    | 9           | 0.002738     | 9           | TRUE         | TRUE              |
| 1     | CASYHTVSL  | 657   | 665  | 9              | HLA-A*02:01 | 657           | 9.1            | CASYHTVSL   | CASYHTVSL   | 0.002696    | 9.1         | 0.002696     | 9.1         | TRUE         | TRUE              |
| 1     | IGYQPYRVV  | 489   | 497  | 9              | HLA-A*02:01 | 489           | 9.2            | IGYQPYRVV   | IGYQPYRVV   | 0.002626    | 9.2         | 0.002626     | 9.2         | TRUE         | TRUE              |
| 1     | QPIDVVRDL  | 201   | 209  | 9              | HLA-A*02:01 | 201           | 9.2            | QPIDVVRDL   | QPIDVVRDL   | 0.002613    | 9.2         | 0.002613     | 9.2         | TRUE         | TRUE              |
| 1     | MSLGADSSI  | 679   | 687  | 9              | HLA-A*02:01 | 679           | 9.2            | MSLGADSSI   | MSLGADSSI   | 0.002593    | 9.2         | 0.002593     | 9.2         | TRUE         | TRUE              |
| 1     | AEIRASANL  | 998   | 1006 | 9              | HLA-A*02:01 | 998           | 9.3            | AEIRASANL   | AEIRASANL   | 0.002573    | 9.3         | 0.002573     | 9.3         | TRUE         | TRUE              |
| 1     | NTAIPTNPF  | 692   | 700  | 9              | HLA-A*02:01 | 692           | 9.3            | NTAIPTNPF   | NTAIPTNPF   | 0.002498    | 9.3         | 0.002498     | 9.3         | TRUE         | TRUE              |
| 1     | SVIINNST   | 113   | 121  | 9              | HLA-A*02:01 | 113           | 9.4            | SVIINNST    | SVIINNST    | 0.002436    | 9.4         | 0.002436     | 9.4         | TRUE         | TRUE              |
| 1     | STNVVIRAC  | 120   | 128  | 9              | HLA-A*02:01 | 120           | 9.5            | STNVVIRAC   | STNVVIRAC   | 0.002417    | 9.5         | 0.002417     | 9.5         | TRUE         | TRUE              |
| 1     | GFHTINHFT  | 68    | 76   | 9              | HLA-A*02:01 | 68            | 9.5            | GFHTINHFT   | GFHTINHFT   | 0.002394    | 9.5         | 0.002394     | 9.5         | TRUE         | TRUE              |
| 1     | FCTQLNRL   | 741   | 749  | 9              | HLA-A*02:01 | 741           | 9.5            | FCTQLNRL    | FCTQLNRL    | 0.002387    | 9.5         | 0.002387     | 9.5         | TRUE         | TRUE              |
| 1     | PIQPELDSF  | 1122  | 1130 | 9              | HLA-A*02:01 | 1122          | 9.6            | PIQPELDSF   | PIQPELDSF   | 0.002337    | 9.6         | 0.002337     | 9.6         | TRUE         | TRUE              |
| 1     | EYSDAFSL   | 162   | 170  | 9              | HLA-A*02:01 | 162           | 9.6            | EYSDAFSL    | EYSDAFSL    | 0.002337    | 9.6         | 0.002337     | 9.6         | TRUE         | TRUE              |
| 1     | WLGFIAGLI  | 1199  | 1207 | 9              | HLA-A*02:01 | 1199          | 9.6            | WLGFIAGLI   | WLGFIAGLI   | 0.002337    | 9.6         | 0.002337     | 9.6         | TRUE         | TRUE              |
| 1     | FIEDLFNFK  | 799   | 807  | 9              | HLA-A*02:01 | 799           | 9.6            | FIEDLFNFK   | FIEDLFNFK   | 0.002335    | 9.6         | 0.002335     | 9.6         | TRUE         | TRUE              |
| 1     | VVRDLPSGF  | 205   | 213  | 9              | HLA-A*02:01 | 205           | 9.6            | VVRDLPSGF   | VVRDLPSGF   | 0.002331    | 9.6         | 0.002331     | 9.6         | TRUE         | TRUE              |
| 1     | GLCUGAEHV  | 634   | 642  | 9              | HLA-A*02:01 | 634           | 9.7            | GLCUGAEHV   | GLCUGAEHV   | 0.002308    | 9.7         | 0.002308     | 9.7         | TRUE         | TRUE              |
| 1     | GGFNFSQIL  | 780   | 788  | 9              | HLA-A*02:01 | 780           | 9.7            | GGFNFSQIL   | GGFNFSQIL   | 0.002304    | 9.7         | 0.002304     | 9.7         | TRUE         | TRUE              |
| 1     | CVNFNFNGL  | 524   | 532  | 9              | HLA-A*02:01 | 524           | 9.7            | CVNFNFNGL   | CVNFNFNGL   | 0.002278    | 9.7         | 0.002278     | 9.7         | TRUE         | TRUE              |
| 1     | SQNPLAELK  | 279   | 287  | 9              | HLA-A*02:01 | 279           | 9.8            | SQNPLAELK   | SQNPLAELK   | 0.002234    | 9.8         | 0.002234     | 9.8         | TRUE         | TRUE              |
| 1     | QAAPHGVVF  | 1036  | 1044 | 9              | HLA-A*02:01 | 1036          | 9.9            | QAAPHGVVF   | QAAPHGVVF   | 0.002215    | 9.9         | 0.002215     | 9.9         | TRUE         | TRUE              |
| 1     | FSQILPDPL  | 784   | 792  | 9              | HLA-A*02:01 | 784           | 9.9            | FSQILPDPL   | FSQILPDPL   | 0.002166    | 9.9         | 0.002166     | 9.9         | TRUE         | TRUE              |
| 1     | GVSVITPGT  | 580   | 588  | 9              | HLA-A*02:01 | 580           | 10             | GVSVITPGT   | GVSVITPGT   | 0.002146    | 10          | 0.002146     | 10          | TRUE         | TRUE              |
| 1     | RNFTTAPAI  | 1055  | 1063 | 9              | HLA-A*02:01 | 1055          | 10             | RNFTTAPAI   | RNFTTAPAI   | 0.002128    | 10          | 0.002128     | 10          | TRUE         | TRUE              |
| 1     | FCGKGHYLM  | 1024  | 1032 | 9              | HLA-A*02:01 | 1024          | 11             | FCGKGHYLM   | FCGKGHYLM   | 0.002098    | 11          | 0.002098     | 11          | TRUE         | TRUE              |
| 1     | TVCGPKLST  | 509   | 517  | 9              | HLA-A*02:01 | 509           | 11             | TVCGPKLST   | TVCGPKLST   | 0.002098    | 11          | 0.002098     | 11          | TRUE         | TRUE              |
| 1     | NGLTVLPPL  | 838   | 846  | 9              | HLA-A*02:01 | 838           | 11             | NGLTVLPPL   | NGLTVLPPL   | 0.002092    | 11          | 0.002092     | 11          | TRUE         | TRUE              |
| 1     | AVLYQDVNC  | 595   | 603  | 9              | HLA-A*02:01 | 595           | 11             | AVLYQDVNC   | AVLYQDVNC   | 0.00204     | 11          | 0.00204      | 11          | TRUE         | TRUE              |
| 1     | VYVPDEIFR  | 40    | 48   | 9              | HLA-A*02:01 | 40            | 11             | VYVPDEIFR   | VYVPDEIFR   | 0.002034    | 11          | 0.002034     | 11          | TRUE         | TRUE              |
| 1     | LTQDLFLPF  | 54    | 62   | 9              | HLA-A*02:01 | 54            | 11             | LTQDLFLPF   | LTQDLFLPF   | 0.001994    | 11          | 0.001994     | 11          | TRUE         | TRUE              |
| 1     | AATKMSECV  | 1007  | 1015 | 9              | HLA-A*02:01 | 1007          | 11             | AATKMSECV   | AATKMSECV   | 0.001991    | 11          | 0.001991     | 11          | TRUE         | TRUE              |
| 1     | LYLTQDLFL  | 52    | 60   | 9              | HLA-A*02:01 | 52            | 11             | LYLTQDLFL   | LYLTQDLFL   | 0.00199     | 11          | 0.00199      | 11          | TRUE         | TRUE              |
| 1     | LTVLPLLT   | 840   | 848  | 9              | HLA-A*02:01 | 840           | 11             | LTVLPLLT    | LTVLPLLT    | 0.001982    | 11          | 0.001982     | 11          | TRUE         | TRUE              |
| 1     | TAFSPAQDI  | 236   | 244  | 9              | HLA-A*02:01 | 236           | 11             | TAFSPAQDI   | TAFSPAQDI   | 0.001958    | 11          | 0.001958     | 11          | TRUE         | TRUE              |
| 1     | PMGTQTHTM  | 143   | 151  | 9              | HLA-A*02:01 | 143           | 11             | PMGTQTHTM   | PMGTQTHTM   | 0.00195     | 11          | 0.00195      | 11          | TRUE         | TRUE              |
| 1     | EVMPVSMMAK | 707   | 715  | 9              | HLA-A*02:01 | 707           | 11             | EVMPVSMMAK  | EVMPVSMMAK  | 0.001945    | 11          | 0.001945     | 11          | TRUE         | TRUE              |
| 1     | ASSEVAVLY  | 590   | 598  | 9              | HLA-A*02:01 | 590           | 11             | ASSEVAVLY   | ASSEVAVLY   | 0.001944    | 11          | 0.001944     | 11          | TRUE         | TRUE              |
| 1     | IAYSNNNTIA | 687   | 695  | 9              | HLA-A*02:01 | 687           | 11             | IAYSNNNTIA  | IAYSNNNTIA  | 0.001941    | 11          | 0.001941     | 11          | TRUE         | TRUE              |
| 1     | ILTAFSPAQ  | 234   | 242  | 9              | HLA-A*02:01 | 234           | 11             | ILTAFSPAQ   | ILTAFSPAQ   | 0.001919    | 11          | 0.001919     | 11          | TRUE         | TRUE              |
| 1     | KCYGVSATK  | 365   | 373  | 9              | HLA-A*02:01 | 365           | 11             | KCYGVSATK   | KCYGVSATK   | 0.001877    | 11          | 0.001877     | 11          | TRUE         | TRUE              |
| 1     | FKPLGINI   | 220   | 228  | 9              | HLA-A*02:01 | 220           | 11             | FKPLGINI    | FKPLGINI    | 0.001874    | 11          | 0.001874     | 11          | TRUE         | TRUE              |
| 1     | AIHADQLTP  | 609   | 617  | 9              | HLA-A*02:01 | 609           | 11             | AIHADQLTP   | AIHADQLTP   | 0.001865    | 11          | 0.001865     | 11          | TRUE         | TRUE              |
| 1     | ITTEVMPVSM | 705   | 713  | 9              | HLA-A*02:01 | 705           | 11             | ITTEVMPVSM  | ITTEVMPVSM  | 0.001846    | 11          | 0.001846     | 11          | TRUE         | TRUE              |
| 1     | GQTGVADIY  | 400   | 408  | 9              | HLA-A*02:01 | 400           | 11             | GQTGVADIY   | GQTGVADIY   | 0.001775    | 11          | 0.001775     | 11          | TRUE         | TRUE              |
| 1     | NQKQIANQF  | 901   | 909  | 9              | HLA-A*02:01 | 901           | 11             | NQKQIANQF   | NQKQIANQF   | 0.00177     | 11          | 0.00177      | 11          | TRUE         | TRUE              |
| 1     | GYLKPITFM  | 255   | 263  | 9              | HLA-A*02:01 | 255           | 11             | GYLKPITFM   | GYLKPITFM   | 0.001762    | 11          | 0.001762     | 11          | TRUE         | TRUE              |
| 1     | NCTDVSTAI  | 602   | 610  | 9              | HLA-A*02:01 | 602           | 11             | NCTDVSTAI   | NCTDVSTAI   | 0.00174     | 11          | 0.00174      | 11          | TRUE         | TRUE              |
| 1     | FSPDGKPKCT | 460   | 468  | 9              | HLA-A*02:01 | 460           | 11             | FSPDGKPKCT  | FSPDGKPKCT  | 0.001718    | 11          | 0.001718     | 11          | TRUE         | TRUE              |
| 1     | ELDKYFNKH  | 1133  | 1141 | 9              | HLA-A*02:01 | 1133          | 12             | ELDKYFNKH   | ELDKYFNKH   | 0.001692    | 12          | 0.001692     | 12          | TRUE         | TRUE              |
| 1     | HTFGNVPVP  | 74    | 82   | 9              | HLA-A*02:01 | 74            | 12             | HTFGNVPVP   | HTFGNVPVP   | 0.001667    | 12          | 0.001667     | 12          | TRUE         | TRUE              |
| 1     | WQTSNFRV   | 299   | 307  | 9              | HLA-A*02:01 | 299           | 12             | WQTSNFRV    | WQTSNFRV    | 0.001663    | 12          | 0.001663     | 12          | TRUE         | TRUE              |
| 1     | FLVHWKGYQ  | 193   | 201  | 9              | HLA-A*02:01 | 193           | 12             | FLVHWKGYQ   | FLVHWKGYQ   | 0.001625    | 12          | 0.001625     | 12          | TRUE         | TRUE              |
| 1     | VGAPNVTQH  | 35    | 43   | 9              | HLA-A*02:01 | 35            | 12             | VGAPNVTQH   | VGAPNVTQH   | 0.001613    | 12          | 0.001613     | 12          | TRUE         | TRUE              |
| 1     | LAATKMSEC  | 1006  | 1014 | 9              | HLA-A*02:01 | 1006          | 12             | LAATKMSEC   | LAATKMSEC   | 0.001593    | 12          | 0.001593     | 12          | TRUE         | TRUE              |
| 1     | SQILPDPLK  | 785   | 793  | 9              | HLA-A*02:01 | 785           | 12             | SQILPDPLK   | SQILPDPLK   | 0.001587    | 12          | 0.001587     | 12          | TRUE         | TRUE              |
| 1     | AGWTFGAGA  | 866   | 874  | 9              | HLA-A*02:01 | 866           | 12             | AGWTFGAGA   | AGWTFGAGA   | 0.001584    | 12          | 0.001584     | 12          | TRUE         | TRUE              |
| 1     | QKNGTLTVL  | 835   | 843  | 9              | HLA-A*02:01 | 835           | 12             | QKNGTLTVL   | QKNGTLTVL   | 0.001578    | 12          | 0.001578     | 12          | TRUE         | TRUE              |
| 1     | SGFNLTLPK  | 211   | 219  | 9              | HLA-A*02:01 | 211           | 12             | SGFNLTLPK   | SGFNLTLPK   | 0.001543    | 12          | 0.001543     | 12          | TRUE         | TRUE              |
| 1     | YVPSQERNF  | 1049  | 1057 | 9              | HLA-A*02:01 | 1049          | 12             | YVPSQERNF   | YVPSQERNF   | 0.001543    | 12          | 0.001543     | 12          | TRUE         | TRUE              |
| 1     | RSFIEDLL   | 797   | 805  | 9              | HLA-A*02:01 | 797           | 12             | RSFIEDLL    | RSFIEDLL    | 0.001536    | 12          | 0.001536     | 12          | TRUE         | TRUE              |
| 1     | GTSWFITQR  | 1081  | 1089 | 9              | HLA-A*02:01 | 1081          | 12             | GTSWFITQR   | GTSWFITQR   | 0.001523    | 12          | 0.001523     | 12          | TRUE         | TRUE              |
| 1     | GVVFUHTY   | 1041  | 1049 | 9              | HLA-A*02:01 | 1041          | 12             | GVVFUHTY    | GVVFUHTY    | 0.001519    | 12          | 0.001519     | 12          | TRUE         | TRUE              |
| 1     | MLKYDENG   | 263   | 271  | 9              | HLA-A*02:01 | 263           | 12             | MLKYDENG    | MLKYDENG    | 0.001516    | 12          | 0.001516     | 12          | TRUE         | TRUE              |
| 1     | SLLRSTSQK  | 664   | 672  | 9              | HLA-A*02:01 | 664           | 12             | SLLRSTSQK   | SLLRSTSQK   | 0.001492    | 12          | 0.001492     | 12          | TRUE         | TRUE              |
| 1     | TVLPLLLTD  | 841   | 849  | 9              | HLA-A*02:01 | 841           | 12             | TVLPLLLTD   | TVLPLLLTD   | 0.001486    | 12          | 0.001486     | 12          | TRUE         | TRUE              |
| 1     | FSLDVSEKS  | 168   | 176  | 9              | HLA-A*02:01 | 168           | 12             | FSLDVSEKS   | FSLDVSEKS   | 0.001461    | 12          | 0.001461     | 12          | TRUE         | TRUE              |
| 1     | YLRHGLKLRP | 442   | 450  | 9              | HLA-A*02:01 | 442           | 12             | YLRHGLKLRP  | YLRHGLKLRP  | 0.001458    | 12          | 0.001458     | 12          | TRUE         | TRUE              |
| 1     | ALQIPFAMQ  | 875   | 883  | 9              | HLA-A*02:01 | 875           | 12             | ALQIPFAMQ   | ALQIPFAMQ   | 0.001447    | 12          | 0.001447     | 12          | TRUE         | TRUE              |
| 1     | CVADYSVLY  | 348   | 356  | 9              | HLA-A*02:01 | 348           | 12             | CVADYSVLY   | CVADYSVLY   | 0.001439    | 12          | 0.001439     | 12          | TRUE         | TRUE              |
| 1     | FITQRNFFS  | 1085  | 1093 | 9              | HLA-A*02:01 | 1085          | 12             | FITQRNFFS   | FITQRNFFS   | 0.001435    | 12          | 0.001435     | 12          | TRUE         | TRUE              |
| 1     | SVDCNMYIC  | 717   | 725  | 9              | HLA-A*02:01 | 717           | 12             | SVDCNMYIC   | SVDCNMYIC   | 0.001427    | 12          | 0.001427     | 12          | TRUE         | TRUE              |
| 1     | KAISQIQES  | 911   | 919  | 9              | HLA-A*02:01 | 911           | 12             | KAISQIQES   | KAISQIQES   | 0.001421    | 12          | 0.001421     | 12          | TRUE         | TRUE              |
| 1     | GYQPYRVVV  | 490   | 498  | 9              | HLA-A*02:01 | 490           | 12             | GYQPYRVVV   | GYQPYRVVV   | 0.001419    | 12          | 0.001419     | 12          | TRUE         | TRUE              |
| 1     | LIRAAEIRA  | 994   | 1002 | 9              | HLA-A*02:01 | 994           | 13             | LIRAAEIRA   | LIRAAEIRA   | 0.001374    | 13          | 0.001374     | 13          | TRUE         | TRUE              |
| 1     | TNASSEVAV  | 588   | 596  | 9              | HLA-A*02:01 | 588           | 13             | TNASSEVAV   | TNASSEVAV   | 0.001366    | 13          | 0.001366     | 13          | TRUE         | TRUE              |
| 1     | SVYAWERKK  | 336   | 344  | 9              | HLA-A*02:01 | 336           | 13             | SVYAWERKK   | SVYAWERKK   | 0.001355    | 13          | 0.001355     | 13          | TRUE         | TRUE              |
| 1     | TNFRAILTA  | 229   | 237  | 9              | HLA-A*02:01 | 229           | 13             | TNFRAILTA   | TNFRAILTA   | 0.001349    | 13          | 0.001349     | 13          | TRUE         | TRUE              |
| 1     | FMKYDENG   | 262   | 270  | 9              | HLA-A*02:01 | 262           | 13             | FMKYDENG    | FMKYDENG    | 0.001333    | 13          | 0.001333     | 13          | TRUE         | TRUE              |
| 1     | IANQFNKAI  | 905   | 913  | 9              | HLA-A*02:01 | 905           | 13             | IANQFNKAI   | IANQFNKAI   | 0.001331    | 13          | 0.001331     | 13          | TRUE         | TRUE              |
| 1     | STECANLLL  | 728   | 736  | 9              |             |               |                |             |             |             |             |              |             |              |                   |

| seq # | peptide   | start | end  | peptide length | allele      | peptide index | median binding | netmhcan_el | netmhcan_el | netmhcan_el | netmhcan_el | legacy score | legacy rank | scores equal | percentiles equal |
|-------|-----------|-------|------|----------------|-------------|---------------|----------------|-------------|-------------|-------------|-------------|--------------|-------------|--------------|-------------------|
| 1     | SANLAATKM | 1003  | 1011 | 9              | HLA-A*02:01 | 1003          | 15             | SANLAATKM   | SANLAATKM   | 0.000916    | 15          | 0.000916     | 15          | TRUE         | TRUE              |
| 1     | RFPNITNLC | 315   | 323  | 9              | HLA-A*02:01 | 315           | 15             | RFPNITNLC   | RFPNITNLC   | 0.000914    | 15          | 0.000914     | 15          | TRUE         | TRUE              |
| 1     | AEVQIDRLI | 971   | 979  | 9              | HLA-A*02:01 | 971           | 15             | AEVQIDRLI   | AEVQIDRLI   | 0.000912    | 15          | 0.000912     | 15          | TRUE         | TRUE              |
| 1     | NMYICGDST | 721   | 729  | 9              | HLA-A*02:01 | 721           | 15             | NMYICGDST   | NMYICGDST   | 0.000902    | 15          | 0.000902     | 15          | TRUE         | TRUE              |
| 1     | VFAQVKQMY | 763   | 771  | 9              | HLA-A*02:01 | 763           | 15             | VFAQVKQMY   | VFAQVKQMY   | 0.000879    | 15          | 0.000879     | 15          | TRUE         | TRUE              |
| 1     | QNAQALNTL | 936   | 944  | 9              | HLA-A*02:01 | 936           | 15             | QNAQALNTL   | QNAQALNTL   | 0.000863    | 15          | 0.000863     | 15          | TRUE         | TRUE              |
| 1     | GIYQTSNFR | 298   | 306  | 9              | HLA-A*02:01 | 298           | 15             | GIYQTSNFR   | GIYQTSNFR   | 0.000859    | 15          | 0.000859     | 15          | TRUE         | TRUE              |
| 1     | PLITDDMIA | 845   | 853  | 9              | HLA-A*02:01 | 845           | 15             | PLITDDMIA   | PLITDDMIA   | 0.000857    | 15          | 0.000857     | 15          | TRUE         | TRUE              |
| 1     | YVWLGFAGI | 1197  | 1205 | 9              | HLA-A*02:01 | 1197          | 15             | YVWLGFAGI   | YVWLGFAGI   | 0.000855    | 15          | 0.000855     | 15          | TRUE         | TRUE              |
| 1     | LVKQLSSNF | 944   | 952  | 9              | HLA-A*02:01 | 944           | 15             | LVKQLSSNF   | LVKQLSSNF   | 0.000851    | 15          | 0.000851     | 15          | TRUE         | TRUE              |
| 1     | IAGLIAIVM | 1203  | 1211 | 9              | HLA-A*02:01 | 1203          | 15             | IAGLIAIVM   | IAGLIAIVM   | 0.000847    | 15          | 0.000847     | 15          | TRUE         | TRUE              |
| 1     | NAFNCTFEY | 155   | 163  | 9              | HLA-A*02:01 | 155           | 15             | NAFNCTFEY   | NAFNCTFEY   | 0.000845    | 15          | 0.000845     | 15          | TRUE         | TRUE              |
| 1     | NLLQYGSF  | 733   | 741  | 9              | HLA-A*02:01 | 733           | 15             | NLLQYGSF    | NLLQYGSF    | 0.00084     | 15          | 0.00084      | 15          | TRUE         | TRUE              |
| 1     | VDLGDISGI | 1146  | 1154 | 9              | HLA-A*02:01 | 1146          | 15             | VDLGDISGI   | VDLGDISGI   | 0.000837    | 15          | 0.000837     | 15          | TRUE         | TRUE              |
| 1     | NLAATKMSE | 1005  | 1013 | 9              | HLA-A*02:01 | 1005          | 15             | NLAATKMSE   | NLAATKMSE   | 0.000835    | 15          | 0.000835     | 15          | TRUE         | TRUE              |
| 1     | ESLTTTSTA | 918   | 926  | 9              | HLA-A*02:01 | 918           | 15             | ESLTTTSTA   | ESLTTTSTA   | 0.000829    | 15          | 0.000829     | 15          | TRUE         | TRUE              |
| 1     | NQFNKAISQ | 907   | 915  | 9              | HLA-A*02:01 | 907           | 15             | NQFNKAISQ   | NQFNKAISQ   | 0.000825    | 15          | 0.000825     | 15          | TRUE         | TRUE              |
| 1     | FNGLTGTGV | 529   | 537  | 9              | HLA-A*02:01 | 529           | 16             | FNGLTGTGV   | FNGLTGTGV   | 0.000817    | 16          | 0.000817     | 16          | TRUE         | TRUE              |
| 1     | KGDDVRQIA | 390   | 398  | 9              | HLA-A*02:01 | 390           | 16             | KGDDVRQIA   | KGDDVRQIA   | 0.000809    | 16          | 0.000809     | 16          | TRUE         | TRUE              |
| 1     | FGGFNFQSI | 779   | 787  | 9              | HLA-A*02:01 | 779           | 16             | FGGFNFQSI   | FGGFNFQSI   | 0.000788    | 16          | 0.000788     | 16          | TRUE         | TRUE              |
| 1     | KYDENGTTT | 265   | 273  | 9              | HLA-A*02:01 | 265           | 16             | KYDENGTTT   | KYDENGTTT   | 0.000784    | 16          | 0.000784     | 16          | TRUE         | TRUE              |
| 1     | PVIFPKDGI | 79    | 87   | 9              | HLA-A*02:01 | 79            | 16             | PVIFPKDGI   | PVIFPKDGI   | 0.000783    | 16          | 0.000783     | 16          | TRUE         | TRUE              |
| 1     | LSPELLNAP | 499   | 507  | 9              | HLA-A*02:01 | 499           | 16             | LSPELLNAP   | LSPELLNAP   | 0.000781    | 16          | 0.000781     | 16          | TRUE         | TRUE              |
| 1     | GDVVRFPNI | 311   | 319  | 9              | HLA-A*02:01 | 311           | 16             | GDVVRFPNI   | GDVVRFPNI   | 0.000762    | 16          | 0.000762     | 16          | TRUE         | TRUE              |
| 1     | VVRGWVFGS | 97    | 105  | 9              | HLA-A*02:01 | 97            | 16             | VVRGWVFGS   | VVRGWVFGS   | 0.000754    | 16          | 0.000754     | 16          | TRUE         | TRUE              |
| 1     | VTLDAGFM  | 808   | 816  | 9              | HLA-A*02:01 | 808           | 16             | VTLDAGFM    | VTLDAGFM    | 0.000751    | 16          | 0.000751     | 16          | TRUE         | TRUE              |
| 1     | YYPDEIFRS | 41    | 49   | 9              | HLA-A*02:01 | 41            | 16             | YYPDEIFRS   | YYPDEIFRS   | 0.000751    | 16          | 0.000751     | 16          | TRUE         | TRUE              |
| 1     | QLTPAWRIY | 614   | 622  | 9              | HLA-A*02:01 | 614           | 16             | QLTPAWRIY   | QLTPAWRIY   | 0.00075     | 16          | 0.00075      | 16          | TRUE         | TRUE              |
| 1     | QRNFPSPOI | 1088  | 1096 | 9              | HLA-A*02:01 | 1088          | 16             | QRNFPSPOI   | QRNFPSPOI   | 0.00075     | 16          | 0.00075      | 16          | TRUE         | TRUE              |
| 1     | KVTLADAGF | 807   | 815  | 9              | HLA-A*02:01 | 807           | 16             | KVTLADAGF   | KVTLADAGF   | 0.000747    | 16          | 0.000747     | 16          | TRUE         | TRUE              |
| 1     | GTQHTMIF  | 145   | 153  | 9              | HLA-A*02:01 | 145           | 16             | GTQHTMIF    | GTQHTMIF    | 0.000744    | 16          | 0.000744     | 16          | TRUE         | TRUE              |
| 1     | AYSNTIAI  | 688   | 696  | 9              | HLA-A*02:01 | 688           | 16             | AYSNTIAI    | AYSNTIAI    | 0.000727    | 16          | 0.000727     | 16          | TRUE         | TRUE              |
| 1     | MGQTQHTMI | 144   | 152  | 9              | HLA-A*02:01 | 144           | 16             | MGQTQHTMI   | MGQTQHTMI   | 0.000718    | 16          | 0.000718     | 16          | TRUE         | TRUE              |
| 1     | NFGAISSVL | 951   | 959  | 9              | HLA-A*02:01 | 951           | 17             | NFGAISSVL   | NFGAISSVL   | 0.000696    | 17          | 0.000696     | 17          | TRUE         | TRUE              |
| 1     | LQSLQTYVT | 983   | 991  | 9              | HLA-A*02:01 | 983           | 17             | LQSLQTYVT   | LQSLQTYVT   | 0.000694    | 17          | 0.000694     | 17          | TRUE         | TRUE              |
| 1     | IAPGQTGVI | 397   | 405  | 9              | HLA-A*02:01 | 397           | 17             | IAPGQTGVI   | IAPGQTGVI   | 0.000692    | 17          | 0.000692     | 17          | TRUE         | TRUE              |
| 1     | KFNGLTVL  | 836   | 844  | 9              | HLA-A*02:01 | 836           | 17             | KFNGLTVL    | KFNGLTVL    | 0.000692    | 17          | 0.000692     | 17          | TRUE         | TRUE              |
| 1     | VYADSVFVK | 382   | 390  | 9              | HLA-A*02:01 | 382           | 17             | VYADSVFVK   | VYADSVFVK   | 0.00069     | 17          | 0.00069      | 17          | TRUE         | TRUE              |
| 1     | YADSVFVKG | 383   | 391  | 9              | HLA-A*02:01 | 383           | 17             | YADSVFVKG   | YADSVFVKG   | 0.000685    | 17          | 0.000685     | 17          | TRUE         | TRUE              |
| 1     | ICHEGKAYF | 1063  | 1071 | 9              | HLA-A*02:01 | 1063          | 17             | ICHEGKAYF   | ICHEGKAYF   | 0.000684    | 17          | 0.000684     | 17          | TRUE         | TRUE              |
| 1     | ATKMSECVL | 1008  | 1016 | 9              | HLA-A*02:01 | 1008          | 17             | ATKMSECVL   | ATKMSECVL   | 0.000682    | 17          | 0.000682     | 17          | TRUE         | TRUE              |
| 1     | EILDISPCS | 569   | 577  | 9              | HLA-A*02:01 | 569           | 17             | EILDISPCS   | EILDISPCS   | 0.000673    | 17          | 0.000673     | 17          | TRUE         | TRUE              |
| 1     | SAAAYFVG  | 248   | 256  | 9              | HLA-A*02:01 | 248           | 17             | SAAAYFVG    | SAAAYFVG    | 0.000671    | 17          | 0.000671     | 17          | TRUE         | TRUE              |
| 1     | EIDRLNEVA | 1164  | 1172 | 9              | HLA-A*02:01 | 1164          | 17             | EIDRLNEVA   | EIDRLNEVA   | 0.000668    | 17          | 0.000668     | 17          | TRUE         | TRUE              |
| 1     | FEDDSEFPV | 1238  | 1246 | 9              | HLA-A*02:01 | 1238          | 17             | FEDDSEFPV   | FEDDSEFPV   | 0.000666    | 17          | 0.000666     | 17          | TRUE         | TRUE              |
| 1     | HLREFVFNK | 181   | 189  | 9              | HLA-A*02:01 | 181           | 17             | HLREFVFNK   | HLREFVFNK   | 0.000656    | 17          | 0.000656     | 17          | TRUE         | TRUE              |
| 1     | SDLDRCITF | 14    | 22   | 9              | HLA-A*02:01 | 14            | 17             | SDLDRCITF   | SDLDRCITF   | 0.000653    | 17          | 0.000653     | 17          | TRUE         | TRUE              |
| 1     | GTNASSEVA | 587   | 595  | 9              | HLA-A*02:01 | 587           | 17             | GTNASSEVA   | GTNASSEVA   | 0.000651    | 17          | 0.000651     | 17          | TRUE         | TRUE              |
| 1     | CMTSCCCL  | 1218  | 1226 | 9              | HLA-A*02:01 | 1218          | 17             | CMTSCCCL    | CMTSCCCL    | 0.000649    | 17          | 0.000649     | 17          | TRUE         | TRUE              |
| 1     | YTHQTSMMR | 30    | 38   | 9              | HLA-A*02:01 | 30            | 17             | YTHQTSMMR   | YTHQTSMMR   | 0.000646    | 17          | 0.000646     | 17          | TRUE         | TRUE              |
| 1     | PVSMAKTSV | 710   | 718  | 9              | HLA-A*02:01 | 710           | 17             | PVSMAKTSV   | PVSMAKTSV   | 0.000636    | 17          | 0.000636     | 17          | TRUE         | TRUE              |
| 1     | YRRLRHGKL | 440   | 448  | 9              | HLA-A*02:01 | 440           | 17             | YRRLRHGKL   | YRRLRHGKL   | 0.00063     | 17          | 0.00063      | 17          | TRUE         | TRUE              |
| 1     | RAILTAASP | 232   | 240  | 9              | HLA-A*02:01 | 232           | 17             | RAILTAASP   | RAILTAASP   | 0.000629    | 17          | 0.000629     | 17          | TRUE         | TRUE              |
| 1     | TAIPIFNFS | 693   | 701  | 9              | HLA-A*02:01 | 693           | 17             | TAIPIFNFS   | TAIPIFNFS   | 0.000624    | 17          | 0.000624     | 17          | TRUE         | TRUE              |
| 1     | GKPCPPAL  | 464   | 472  | 9              | HLA-A*02:01 | 464           | 17             | GKPCPPAL    | GKPCPPAL    | 0.000619    | 17          | 0.000619     | 17          | TRUE         | TRUE              |
| 1     | DISNVPFS  | 454   | 462  | 9              | HLA-A*02:01 | 454           | 17             | DISNVPFS    | DISNVPFS    | 0.000618    | 17          | 0.000618     | 17          | TRUE         | TRUE              |
| 1     | KINDLCSFN | 373   | 381  | 9              | HLA-A*02:01 | 373           | 17             | KINDLCSFN   | KINDLCSFN   | 0.000609    | 17          | 0.000609     | 17          | TRUE         | TRUE              |
| 1     | KLSTDLKLN | 514   | 522  | 9              | HLA-A*02:01 | 514           | 17             | KLSTDLKLN   | KLSTDLKLN   | 0.000609    | 17          | 0.000609     | 17          | TRUE         | TRUE              |
| 1     | FQFPQFGR  | 545   | 553  | 9              | HLA-A*02:01 | 545           | 18             | FQFPQFGR    | FQFPQFGR    | 0.000601    | 18          | 0.000601     | 18          | TRUE         | TRUE              |
| 1     | VPSGDVVR  | 308   | 316  | 9              | HLA-A*02:01 | 308           | 18             | VPSGDVVR    | VPSGDVVR    | 0.000598    | 18          | 0.000598     | 18          | TRUE         | TRUE              |
| 1     | YSVLNSTF  | 352   | 360  | 9              | HLA-A*02:01 | 352           | 18             | YSVLNSTF    | YSVLNSTF    | 0.000595    | 18          | 0.000595     | 18          | TRUE         | TRUE              |
| 1     | FRSDTLVLT | 47    | 55   | 9              | HLA-A*02:01 | 47            | 18             | FRSDTLVLT   | FRSDTLVLT   | 0.000594    | 18          | 0.000594     | 18          | TRUE         | TRUE              |
| 1     | TAALVSGTA | 856   | 864  | 9              | HLA-A*02:01 | 856           | 18             | TAALVSGTA   | TAALVSGTA   | 0.000587    | 18          | 0.000587     | 18          | TRUE         | TRUE              |
| 1     | VVPSGDVVR | 307   | 315  | 9              | HLA-A*02:01 | 307           | 18             | VVPSGDVVR   | VVPSGDVVR   | 0.000587    | 18          | 0.000587     | 18          | TRUE         | TRUE              |
| 1     | RASANLAAT | 1001  | 1009 | 9              | HLA-A*02:01 | 1001          | 18             | RASANLAAT   | RASANLAAT   | 0.000575    | 18          | 0.000575     | 18          | TRUE         | TRUE              |
| 1     | IHADQLTPA | 610   | 618  | 9              | HLA-A*02:01 | 610           | 18             | IHADQLTPA   | IHADQLTPA   | 0.000573    | 18          | 0.000573     | 18          | TRUE         | TRUE              |
| 1     | YAWERKKIS | 338   | 346  | 9              | HLA-A*02:01 | 338           | 18             | YAWERKKIS   | YAWERKKIS   | 0.000571    | 18          | 0.000571     | 18          | TRUE         | TRUE              |
| 1     | TTTGIGYOP | 485   | 493  | 9              | HLA-A*02:01 | 485           | 18             | TTTGIGYOP   | TTTGIGYOP   | 0.000568    | 18          | 0.000568     | 18          | TRUE         | TRUE              |
| 1     | ATSTGNNY  | 430   | 438  | 9              | HLA-A*02:01 | 430           | 18             | ATSTGNNY    | ATSTGNNY    | 0.000567    | 18          | 0.000567     | 18          | TRUE         | TRUE              |
| 1     | SFKEELDKY | 1129  | 1137 | 9              | HLA-A*02:01 | 1129          | 18             | SFKEELDKY   | SFKEELDKY   | 0.000565    | 18          | 0.000565     | 18          | TRUE         | TRUE              |
| 1     | VITPGTNAS | 583   | 591  | 9              | HLA-A*02:01 | 583           | 18             | VITPGTNAS   | VITPGTNAS   | 0.000557    | 18          | 0.000557     | 18          | TRUE         | TRUE              |
| 1     | YKPTPLKY  | 771   | 779  | 9              | HLA-A*02:01 | 771           | 18             | YKPTPLKY    | YKPTPLKY    | 0.000557    | 18          | 0.000557     | 18          | TRUE         | TRUE              |
| 1     | FKNHTSPDV | 1138  | 1146 | 9              | HLA-A*02:01 | 1138          | 18             | FKNHTSPDV   | FKNHTSPDV   | 0.000547    | 18          | 0.000547     | 18          | TRUE         | TRUE              |
| 1     | RVDFCGKGY | 1021  | 1029 | 9              | HLA-A*02:01 | 1021          | 18             | RVDFCGKGY   | RVDFCGKGY   | 0.000545    | 18          | 0.000545     | 18          | TRUE         | TRUE              |
| 1     | YFVGVLKPT | 252   | 260  | 9              | HLA-A*02:01 | 252           | 18             | YFVGVLKPT   | YFVGVLKPT   | 0.000542    | 18          | 0.000542     | 18          | TRUE         | TRUE              |
| 1     | EPVLKGVKL | 1244  | 1252 | 9              | HLA-A*02:01 | 1244          | 18             | EPVLKGVKL   | EPVLKGVKL   | 0.000539    | 18          | 0.000539     | 18          | TRUE         | TRUE              |
| 1     | LPDLPKPTK | 788   | 796  | 9              | HLA-A*02:01 | 788           | 18             | LPDLPKPTK   | LPDLPKPTK   | 0.000537    | 18          | 0.000537     | 18          | TRUE         | TRUE              |
| 1     | RNFFSPQII | 1089  | 1097 | 9              | HLA-A*02:01 | 1089          | 18             | RNFFSPQII   | RNFFSPQII   | 0.000534    | 18          | 0.000534     | 18          | TRUE         | TRUE              |
| 1     | ISGINASVV | 1151  | 1159 | 9              | HLA-A*02:01 | 1151          | 18             | ISGINASVV   | ISGINASVV   | 0.000529    | 18          | 0.000529     | 18          | TRUE         | TRUE              |
| 1     | QIDRLITGR | 974   | 982  | 9              | HLA-A*02:01 | 974           | 18             | QIDRLITGR   | QIDRLITGR   | 0.000529    | 18          | 0.000529     | 18          | TRUE         | TRUE              |
| 1     | QLIRAAEIR | 993   | 1001 | 9              | HLA-A*02:01 | 993           | 18             | QLIRAAEIR   | QLIRAAEIR   | 0.000529    | 18          | 0.000529     | 18          | TRUE         | TRUE              |
| 1     | LKIKQCYNF | 519   | 527  | 9              | HLA-A*02:01 | 519           | 18             | LKIKQCYNF   | LKIKQCYNF   | 0.000528    | 18          | 0.000528     | 18          | TRUE         | TRUE              |
| 1     | INNSTNNVI | 117   | 125  | 9              | HLA-A*02:01 | 117           | 19             | INNSTNNVI   | INNSTNNVI   | 0.000521    | 19          | 0.000521     | 19          | TRUE         | TRUE              |
| 1     | TDLIKNCQV | 517   | 525  | 9              | HLA-A*02:01 | 517           | 19             | TDLIKNCQV   | TDLIKNCQV   | 0.000521    | 19          | 0.000521     | 19          | TRUE         | TRUE              |
| 1     | TFGNPVPIF | 75    | 83   | 9              | HLA-A*02:01 | 75            | 19             | TFGNPVPIF   | TFGNPVPIF   | 0           |             |              |             |              |                   |

| seq # | peptide    | start | end  | peptide length | allele      | peptide index | median binding | netmhcan_el | netmhcan_el | netmhcan_el | netmhcan_el | legacy score | legacy rank | scores equal | percentiles equal |
|-------|------------|-------|------|----------------|-------------|---------------|----------------|-------------|-------------|-------------|-------------|--------------|-------------|--------------|-------------------|
| 1     | YWPLNDYGF  | 475   | 483  | 9              | HLA-A*02:01 | 475           | 20             | YWPLNDYGF   | YWPLNDYGF   | 0.000416    | 20          | 0.000416     | 20          | TRUE         | TRUE              |
| 1     | IINNTVYDP  | 1114  | 1122 | 9              | HLA-A*02:01 | 1114          | 20             | IINNTVYDP   | IINNTVYDP   | 0.000415    | 20          | 0.000415     | 20          | TRUE         | TRUE              |
| 1     | GYQPIDVVR  | 199   | 207  | 9              | HLA-A*02:01 | 199           | 20             | GYQPIDVVR   | GYQPIDVVR   | 0.000407    | 20          | 0.000407     | 20          | TRUE         | TRUE              |
| 1     | SVDRPKTSE  | 561   | 569  | 9              | HLA-A*02:01 | 561           | 20             | SVDRPKTSE   | SVDRPKTSE   | 0.000406    | 20          | 0.000406     | 20          | TRUE         | TRUE              |
| 1     | ELKCSVKSF  | 285   | 293  | 9              | HLA-A*02:01 | 285           | 21             | ELKCSVKSF   | ELKCSVKSF   | 0.000403    | 21          | 0.000403     | 21          | TRUE         | TRUE              |
| 1     | YNSTFFSTF  | 356   | 364  | 9              | HLA-A*02:01 | 356           | 21             | YNSTFFSTF   | YNSTFFSTF   | 0.0004      | 21          | 0.0004       | 21          | TRUE         | TRUE              |
| 1     | ITNFRALIT  | 228   | 236  | 9              | HLA-A*02:01 | 228           | 21             | ITNFRALIT   | ITNFRALIT   | 0.000397    | 21          | 0.000397     | 21          | TRUE         | TRUE              |
| 1     | SFELLNAPA  | 500   | 508  | 9              | HLA-A*02:01 | 500           | 21             | SFELLNAPA   | SFELLNAPA   | 0.000393    | 21          | 0.000393     | 21          | TRUE         | TRUE              |
| 1     | CTPPALNCY  | 467   | 475  | 9              | HLA-A*02:01 | 467           | 21             | CTPPALNCY   | CTPPALNCY   | 0.000391    | 21          | 0.000391     | 21          | TRUE         | TRUE              |
| 1     | VSDFDTSVR  | 555   | 563  | 9              | HLA-A*02:01 | 555           | 21             | VSDFDTSVR   | VSDFDTSVR   | 0.00039     | 21          | 0.00039      | 21          | TRUE         | TRUE              |
| 1     | LGDSDGINA  | 1148  | 1156 | 9              | HLA-A*02:01 | 1148          | 21             | LGDSDGINA   | LGDSDGINA   | 0.000386    | 21          | 0.000386     | 21          | TRUE         | TRUE              |
| 1     | ITDNTFVS   | 1097  | 1105 | 9              | HLA-A*02:01 | 1097          | 21             | ITDNTFVS    | ITDNTFVS    | 0.000378    | 21          | 0.000378     | 21          | TRUE         | TRUE              |
| 1     | GADSSIAYS  | 682   | 690  | 9              | HLA-A*02:01 | 682           | 21             | GADSSIAYS   | GADSSIAYS   | 0.000375    | 21          | 0.000375     | 21          | TRUE         | TRUE              |
| 1     | IPFAMQMAY  | 878   | 886  | 9              | HLA-A*02:01 | 878           | 21             | IPFAMQMAY   | IPFAMQMAY   | 0.000375    | 21          | 0.000375     | 21          | TRUE         | TRUE              |
| 1     | EVAKNLNES  | 1170  | 1178 | 9              | HLA-A*02:01 | 1170          | 21             | EVAKNLNES   | EVAKNLNES   | 0.000372    | 21          | 0.000372     | 21          | TRUE         | TRUE              |
| 1     | AAYTAALVS  | 853   | 861  | 9              | HLA-A*02:01 | 853           | 21             | AAYTAALVS   | AAYTAALVS   | 0.000371    | 21          | 0.000371     | 21          | TRUE         | TRUE              |
| 1     | NYTQHTSSM  | 29    | 37   | 9              | HLA-A*02:01 | 29            | 21             | NYTQHTSSM   | NYTQHTSSM   | 0.000361    | 21          | 0.000361     | 21          | TRUE         | TRUE              |
| 1     | LGDINARDL  | 823   | 831  | 9              | HLA-A*02:01 | 823           | 21             | LGDINARDL   | LGDINARDL   | 0.000359    | 21          | 0.000359     | 21          | TRUE         | TRUE              |
| 1     | TFVSGNCDO  | 1102  | 1110 | 9              | HLA-A*02:01 | 1102          | 21             | TFVSGNCDO   | TFVSGNCDO   | 0.000357    | 21          | 0.000357     | 21          | TRUE         | TRUE              |
| 1     | FKEELDKYF  | 1130  | 1138 | 9              | HLA-A*02:01 | 1130          | 22             | FKEELDKYF   | FKEELDKYF   | 0.000355    | 22          | 0.000355     | 22          | TRUE         | TRUE              |
| 1     | RDPKTSFIL  | 563   | 571  | 9              | HLA-A*02:01 | 563           | 22             | RDPKTSFIL   | RDPKTSFIL   | 0.000354    | 22          | 0.000354     | 22          | TRUE         | TRUE              |
| 1     | TLVKQLSSN  | 943   | 951  | 9              | HLA-A*02:01 | 943           | 22             | TLVKQLSSN   | TLVKQLSSN   | 0.000354    | 22          | 0.000354     | 22          | TRUE         | TRUE              |
| 1     | KTSELDIS   | 566   | 574  | 9              | HLA-A*02:01 | 566           | 22             | KTSELDIS    | KTSELDIS    | 0.000351    | 22          | 0.000351     | 22          | TRUE         | TRUE              |
| 1     | LNLCFCSNV  | 374   | 382  | 9              | HLA-A*02:01 | 374           | 22             | LNLCFCSNV   | LNLCFCSNV   | 0.000351    | 22          | 0.000351     | 22          | TRUE         | TRUE              |
| 1     | YSNVTFGHT  | 63    | 71   | 9              | HLA-A*02:01 | 63            | 22             | YSNVTFGHT   | YSNVTFGHT   | 0.00035     | 22          | 0.00035      | 22          | TRUE         | TRUE              |
| 1     | SFGGVSVIT  | 577   | 585  | 9              | HLA-A*02:01 | 577           | 22             | SFGGVSVIT   | SFGGVSVIT   | 0.000349    | 22          | 0.000349     | 22          | TRUE         | TRUE              |
| 1     | AAFYVGYLK  | 250   | 258  | 9              | HLA-A*02:01 | 250           | 22             | AAFYVGYLK   | AAFYVGYLK   | 0.000348    | 22          | 0.000348     | 22          | TRUE         | TRUE              |
| 1     | YIKWPWYVW  | 1191  | 1199 | 9              | HLA-A*02:01 | 1191          | 22             | YIKWPWYVW   | YIKWPWYVW   | 0.000347    | 22          | 0.000347     | 22          | TRUE         | TRUE              |
| 1     | QYGSFCTQL  | 737   | 745  | 9              | HLA-A*02:01 | 737           | 22             | QYGSFCTQL   | QYGSFCTQL   | 0.000346    | 22          | 0.000346     | 22          | TRUE         | TRUE              |
| 1     | DSTECANLL  | 727   | 735  | 9              | HLA-A*02:01 | 727           | 22             | DSTECANLL   | DSTECANLL   | 0.000342    | 22          | 0.000342     | 22          | TRUE         | TRUE              |
| 1     | GVIADYNNK  | 403   | 411  | 9              | HLA-A*02:01 | 403           | 22             | GVIADYNNK   | GVIADYNNK   | 0.00034     | 22          | 0.00034      | 22          | TRUE         | TRUE              |
| 1     | LGADSSIAI  | 681   | 689  | 9              | HLA-A*02:01 | 681           | 22             | LGADSSIAI   | LGADSSIAI   | 0.000336    | 22          | 0.000336     | 22          | TRUE         | TRUE              |
| 1     | TILLCMTS   | 1213  | 1221 | 9              | HLA-A*02:01 | 1213          | 22             | TILLCMTS    | TILLCMTS    | 0.000336    | 22          | 0.000336     | 22          | TRUE         | TRUE              |
| 1     | SLDVSSEKSG | 169   | 177  | 9              | HLA-A*02:01 | 169           | 22             | SLDVSSEKSG  | SLDVSSEKSG  | 0.000332    | 22          | 0.000332     | 22          | TRUE         | TRUE              |
| 1     | FELCDNPF   | 130   | 138  | 9              | HLA-A*02:01 | 130           | 22             | FELCDNPF    | FELCDNPF    | 0.000331    | 22          | 0.000331     | 22          | TRUE         | TRUE              |
| 1     | NFKHLREFV  | 178   | 186  | 9              | HLA-A*02:01 | 178           | 22             | NFKHLREFV   | NFKHLREFV   | 0.000331    | 22          | 0.000331     | 22          | TRUE         | TRUE              |
| 1     | PLPKTKRSF  | 791   | 799  | 9              | HLA-A*02:01 | 791           | 22             | PLPKTKRSF   | PLPKTKRSF   | 0.000331    | 22          | 0.000331     | 22          | TRUE         | TRUE              |
| 1     | AFSPAQDIW  | 237   | 245  | 9              | HLA-A*02:01 | 237           | 22             | AFSPAQDIW   | AFSPAQDIW   | 0.000329    | 22          | 0.000329     | 22          | TRUE         | TRUE              |
| 1     | RGVYVPDEI  | 38    | 46   | 9              | HLA-A*02:01 | 38            | 22             | RGVYVPDEI   | RGVYVPDEI   | 0.000328    | 22          | 0.000328     | 22          | TRUE         | TRUE              |
| 1     | RSTSQKSI   | 667   | 675  | 9              | HLA-A*02:01 | 667           | 22             | RSTSQKSI    | RSTSQKSI    | 0.000328    | 22          | 0.000328     | 22          | TRUE         | TRUE              |
| 1     | VKGGDVRQI  | 389   | 397  | 9              | HLA-A*02:01 | 389           | 22             | VKGGDVRQI   | VKGGDVRQI   | 0.000327    | 22          | 0.000327     | 22          | TRUE         | TRUE              |
| 1     | FTDSVRDPK  | 558   | 566  | 9              | HLA-A*02:01 | 558           | 22             | FTDSVRDPK   | FTDSVRDPK   | 0.000323    | 22          | 0.000323     | 22          | TRUE         | TRUE              |
| 1     | GKYEQYIKW  | 1186  | 1194 | 9              | HLA-A*02:01 | 1186          | 22             | GKYEQYIKW   | GKYEQYIKW   | 0.000323    | 22          | 0.000323     | 22          | TRUE         | TRUE              |
| 1     | FSNVYADSF  | 379   | 387  | 9              | HLA-A*02:01 | 379           | 22             | FSNVYADSF   | FSNVYADSF   | 0.000322    | 22          | 0.000322     | 22          | TRUE         | TRUE              |
| 1     | IFDNAFNCT  | 152   | 160  | 9              | HLA-A*02:01 | 152           | 22             | IFDNAFNCT   | IFDNAFNCT   | 0.000321    | 22          | 0.000321     | 22          | TRUE         | TRUE              |
| 1     | GAEHVDTSY  | 638   | 646  | 9              | HLA-A*02:01 | 638           | 22             | GAEHVDTSY   | GAEHVDTSY   | 0.000316    | 22          | 0.000316     | 22          | TRUE         | TRUE              |
| 1     | VSKPMGTQT  | 140   | 148  | 9              | HLA-A*02:01 | 140           | 22             | VSKPMGTQT   | VSKPMGTQT   | 0.000316    | 22          | 0.000316     | 22          | TRUE         | TRUE              |
| 1     | AICHEGKAY  | 1062  | 1070 | 9              | HLA-A*02:01 | 1062          | 22             | AICHEGKAY   | AICHEGKAY   | 0.000314    | 22          | 0.000314     | 22          | TRUE         | TRUE              |
| 1     | AYFPREGVF  | 1069  | 1077 | 9              | HLA-A*02:01 | 1069          | 22             | AYFPREGVF   | AYFPREGVF   | 0.000314    | 22          | 0.000314     | 22          | TRUE         | TRUE              |
| 1     | KFDEDDSEP  | 1237  | 1245 | 9              | HLA-A*02:01 | 1237          | 22             | KFDEDDSEP   | KFDEDDSEP   | 0.000314    | 22          | 0.000314     | 22          | TRUE         | TRUE              |
| 1     | LIDLQELGK  | 1179  | 1187 | 9              | HLA-A*02:01 | 1179          | 23             | LIDLQELGK   | LIDLQELGK   | 0.000309    | 23          | 0.000309     | 23          | TRUE         | TRUE              |
| 1     | AVSKPMGTQ  | 139   | 147  | 9              | HLA-A*02:01 | 139           | 23             | AVSKPMGTQ   | AVSKPMGTQ   | 0.000308    | 23          | 0.000308     | 23          | TRUE         | TRUE              |
| 1     | NCVADSVL   | 347   | 355  | 9              | HLA-A*02:01 | 347           | 23             | NCVADSVL    | NCVADSVL    | 0.000307    | 23          | 0.000307     | 23          | TRUE         | TRUE              |
| 1     | AYFVGYLKP  | 251   | 259  | 9              | HLA-A*02:01 | 251           | 23             | AYFVGYLKP   | AYFVGYLKP   | 0.000305    | 23          | 0.000305     | 23          | TRUE         | TRUE              |
| 1     | SSIAYSNNT  | 685   | 693  | 9              | HLA-A*02:01 | 685           | 23             | SSIAYSNNT   | SSIAYSNNT   | 0.000304    | 23          | 0.000304     | 23          | TRUE         | TRUE              |
| 1     | IFLLFLT    | 3     | 11   | 9              | HLA-A*02:01 | 3             | 23             | IFLLFLT     | IFLLFLT     | 0.000303    | 23          | 0.000303     | 23          | TRUE         | TRUE              |
| 1     | ITAPAHGIE  | 1058  | 1066 | 9              | HLA-A*02:01 | 1058          | 23             | ITAPAHGIE   | ITAPAHGIE   | 0.0003      | 23          | 0.0003       | 23          | TRUE         | TRUE              |
| 1     | ERASANLA   | 999   | 1007 | 9              | HLA-A*02:01 | 999           | 23             | ERASANLA    | ERASANLA    | 0.000289    | 23          | 0.000289     | 23          | TRUE         | TRUE              |
| 1     | EVFNATKFP  | 327   | 335  | 9              | HLA-A*02:01 | 327           | 23             | EVFNATKFP   | EVFNATKFP   | 0.000289    | 23          | 0.000289     | 23          | TRUE         | TRUE              |
| 1     | AGAAIQIPF  | 872   | 880  | 9              | HLA-A*02:01 | 872           | 23             | AGAAIQIPF   | AGAAIQIPF   | 0.000288    | 23          | 0.000288     | 23          | TRUE         | TRUE              |
| 1     | NTLVQLSS   | 942   | 950  | 9              | HLA-A*02:01 | 942           | 23             | NTLVQLSS    | NTLVQLSS    | 0.000285    | 23          | 0.000285     | 23          | TRUE         | TRUE              |
| 1     | GVTQNVLYE  | 892   | 900  | 9              | HLA-A*02:01 | 892           | 23             | GVTQNVLYE   | GVTQNVLYE   | 0.000284    | 23          | 0.000284     | 23          | TRUE         | TRUE              |
| 1     | TINHTFGNP  | 71    | 79   | 9              | HLA-A*02:01 | 71            | 23             | TINHTFGNP   | TINHTFGNP   | 0.000284    | 23          | 0.000284     | 23          | TRUE         | TRUE              |
| 1     | IADYNYKLP  | 405   | 413  | 9              | HLA-A*02:01 | 405           | 23             | IADYNYKLP   | IADYNYKLP   | 0.000282    | 23          | 0.000282     | 23          | TRUE         | TRUE              |
| 1     | FEIDKGIYQ  | 293   | 301  | 9              | HLA-A*02:01 | 293           | 23             | FEIDKGIYQ   | FEIDKGIYQ   | 0.000281    | 23          | 0.000281     | 23          | TRUE         | TRUE              |
| 1     | KYFGGFNFS  | 777   | 785  | 9              | HLA-A*02:01 | 777           | 23             | KYFGGFNFS   | KYFGGFNFS   | 0.000281    | 23          | 0.000281     | 23          | TRUE         | TRUE              |
| 1     | PQAAHPGVV  | 1035  | 1043 | 9              | HLA-A*02:01 | 1035          | 23             | PQAAHPGVV   | PQAAHPGVV   | 0.000288    | 23          | 0.000288     | 23          | TRUE         | TRUE              |
| 1     | ASANLAATK  | 1002  | 1010 | 9              | HLA-A*02:01 | 1002          | 23             | ASANLAATK   | ASANLAATK   | 0.000285    | 23          | 0.000285     | 23          | TRUE         | TRUE              |
| 1     | SVKSFEDIK  | 289   | 297  | 9              | HLA-A*02:01 | 289           | 23             | SVKSFEDIK   | SVKSFEDIK   | 0.00028     | 23          | 0.00028      | 23          | TRUE         | TRUE              |
| 1     | TFSTFKCY   | 359   | 367  | 9              | HLA-A*02:01 | 359           | 23             | TFSTFKCY    | TFSTFKCY    | 0.00028     | 23          | 0.00028      | 23          | TRUE         | TRUE              |
| 1     | INHTFGNPV  | 72    | 80   | 9              | HLA-A*02:01 | 72            | 23             | INHTFGNPV   | INHTFGNPV   | 0.000279    | 23          | 0.000279     | 23          | TRUE         | TRUE              |
| 1     | MFIFLLFLT  | 1     | 9    | 9              | HLA-A*02:01 | 1             | 23             | MFIFLLFLT   | MFIFLLFLT   | 0.000279    | 23          | 0.000279     | 23          | TRUE         | TRUE              |
| 1     | RALSGIAAE  | 747   | 755  | 9              | HLA-A*02:01 | 747           | 23             | RALSGIAAE   | RALSGIAAE   | 0.000279    | 23          | 0.000279     | 23          | TRUE         | TRUE              |
| 1     | FKHLREFVF  | 179   | 187  | 9              | HLA-A*02:01 | 179           | 24             | FKHLREFVF   | FKHLREFVF   | 0.000276    | 24          | 0.000276     | 24          | TRUE         | TRUE              |
| 1     | NATKFPSPVY | 330   | 338  | 9              | HLA-A*02:01 | 330           | 24             | NATKFPSPVY  | NATKFPSPVY  | 0.000272    | 24          | 0.000272     | 24          | TRUE         | TRUE              |
| 1     | GNFKHLREF  | 177   | 185  | 9              | HLA-A*02:01 | 177           | 24             | GNFKHLREF   | GNFKHLREF   | 0.000271    | 24          | 0.000271     | 24          | TRUE         | TRUE              |
| 1     | RSDTLYLTQ  | 48    | 56   | 9              | HLA-A*02:01 | 48            | 24             | RSDTLYLTQ   | RSDTLYLTQ   | 0.000271    | 24          | 0.000271     | 24          | TRUE         | TRUE              |
| 1     | ECANLLQY   | 730   | 738  | 9              | HLA-A*02:01 | 730           | 24             | ECANLLQY    | ECANLLQY    | 0.00027     | 24          | 0.00027      | 24          | TRUE         | TRUE              |
| 1     | TMSLGADSS  | 678   | 686  | 9              | HLA-A*02:01 | 678           | 24             | TMSLGADSS   | TMSLGADSS   | 0.000268    | 24          | 0.000268     | 24          | TRUE         | TRUE              |
| 1     | DEIFRSDTL  | 44    | 52   | 9              | HLA-A*02:01 | 44            | 24             | DEIFRSDTL   | DEIFRSDTL   | 0.000267    | 24          | 0.000267     | 24          | TRUE         | TRUE              |
| 1     | PFKDGIFYA  | 82    | 90   | 9              | HLA-A*02:01 | 82            | 24             | PFKDGIFYA   | PFKDGIFYA   | 0.000264    | 24          | 0.000264     | 24          | TRUE         | TRUE              |
| 1     | AALVSGTAT  | 857   | 865  | 9              | HLA-A*02:01 | 857           | 24             | AALVSGTAT   | AALVSGTAT   | 0.000263    | 24          | 0.000263     | 24          | TRUE         | TRUE              |
| 1     | FYTITGIGY  | 483   | 491  | 9              | HLA-A*02:01 | 483           | 24             | FYTITGIGY   | FYTITGIGY   | 0.000262    | 24          | 0.000262     | 24          | TRUE         | TRUE              |
| 1     | SNCVADYSV  | 346   | 354  | 9              | HLA-A*02:01 | 346           | 24             | SNCVADYSV   | SNCVADYSV   | 0.00026     | 24          | 0.00026      | 24          | TRUE         | TRUE              |
| 1     | GTITDAVDC  | 270   | 278  | 9              | HLA-A*02:01 | 270           | 24             | GTITDAVDC   | GTITDAVDC   | 0.000256    | 24          | 0.000256     | 24          | TRUE         |                   |

| seq # | peptide    | start | end  | peptide length | allele      | peptide index | median binding | netmhcan_el | netmhcan_el | netmhcan_el | netmhcan_el | legacy score | legacy rank | scores equal | percentiles equal |
|-------|------------|-------|------|----------------|-------------|---------------|----------------|-------------|-------------|-------------|-------------|--------------|-------------|--------------|-------------------|
| 1     | KSGNFKHLR  | 175   | 183  | 9              | HLA-A*02:01 | 175           | 26             | KSGNFKHLR   | KSGNFKHLR   | 0.00022     | 26          | 0.00022      | 26          | TRUE         | TRUE              |
| 1     | DKVEAEVQI  | 967   | 975  | 9              | HLA-A*02:01 | 967           | 26             | DKVEAEVQI   | DKVEAEVQI   | 0.000219    | 26          | 0.000219     | 26          | TRUE         | TRUE              |
| 1     | SNVYADSFV  | 380   | 388  | 9              | HLA-A*02:01 | 380           | 26             | SNVYADSFV   | SNVYADSFV   | 0.000219    | 26          | 0.000219     | 26          | TRUE         | TRUE              |
| 1     | TPAWRIYST  | 616   | 624  | 9              | HLA-A*02:01 | 616           | 26             | TPAWRIYST   | TPAWRIYST   | 0.000217    | 26          | 0.000217     | 26          | TRUE         | TRUE              |
| 1     | MSFPOAAHP  | 1032  | 1040 | 9              | HLA-A*02:01 | 1032          | 26             | MSFPOAAHP   | MSFPOAAHP   | 0.000215    | 26          | 0.000215     | 26          | TRUE         | TRUE              |
| 1     | ISITTEVMP  | 702   | 710  | 9              | HLA-A*02:01 | 702           | 26             | ISITTEVMP   | ISITTEVMP   | 0.000213    | 26          | 0.000213     | 26          | TRUE         | TRUE              |
| 1     | NCDVVGII   | 1107  | 1115 | 9              | HLA-A*02:01 | 1107          | 26             | NCDVVGII    | NCDVVGII    | 0.000213    | 26          | 0.000213     | 26          | TRUE         | TRUE              |
| 1     | ADSVLYNS   | 350   | 358  | 9              | HLA-A*02:01 | 350           | 26             | ADSVLYNS    | ADSVLYNS    | 0.00021     | 26          | 0.00021      | 26          | TRUE         | TRUE              |
| 1     | KPMGTQHT   | 142   | 150  | 9              | HLA-A*02:01 | 142           | 26             | KPMGTQHT    | KPMGTQHT    | 0.00021     | 26          | 0.00021      | 26          | TRUE         | TRUE              |
| 1     | LADAGFMKQ  | 810   | 818  | 9              | HLA-A*02:01 | 810           | 26             | LADAGFMKQ   | LADAGFMKQ   | 0.00021     | 26          | 0.00021      | 26          | TRUE         | TRUE              |
| 1     | NDYGFYTT   | 479   | 487  | 9              | HLA-A*02:01 | 479           | 26             | NDYGFYTT    | NDYGFYTT    | 0.00021     | 26          | 0.00021      | 26          | TRUE         | TRUE              |
| 1     | RFGNGVVTQ  | 887   | 895  | 9              | HLA-A*02:01 | 887           | 26             | RFGNGVVTQ   | RFGNGVVTQ   | 0.000209    | 26          | 0.000209     | 26          | TRUE         | TRUE              |
| 1     | ADAGFMKQY  | 811   | 819  | 9              | HLA-A*02:01 | 811           | 26             | ADAGFMKQY   | ADAGFMKQY   | 0.000206    | 26          | 0.000206     | 26          | TRUE         | TRUE              |
| 1     | FELNAPAT   | 501   | 509  | 9              | HLA-A*02:01 | 501           | 26             | FELNAPAT    | FELNAPAT    | 0.000205    | 26          | 0.000205     | 26          | TRUE         | TRUE              |
| 1     | VSGNCDVVI  | 1104  | 1112 | 9              | HLA-A*02:01 | 1104          | 26             | VSGNCDVVI   | VSGNCDVVI   | 0.000203    | 26          | 0.000203     | 26          | TRUE         | TRUE              |
| 1     | VNYKYRYLR  | 436   | 444  | 9              | HLA-A*02:01 | 436           | 27             | VNYKYRYLR   | VNYKYRYLR   | 0.000198    | 27          | 0.000198     | 27          | TRUE         | TRUE              |
| 1     | YSNNTIAP   | 689   | 697  | 9              | HLA-A*02:01 | 689           | 27             | YSNNTIAP    | YSNNTIAP    | 0.000198    | 27          | 0.000198     | 27          | TRUE         | TRUE              |
| 1     | NFRALITAF  | 230   | 238  | 9              | HLA-A*02:01 | 230           | 27             | NFRALITAF   | NFRALITAF   | 0.000196    | 27          | 0.000196     | 27          | TRUE         | TRUE              |
| 1     | IPGAGICA   | 650   | 658  | 9              | HLA-A*02:01 | 650           | 27             | IPGAGICA    | IPGAGICA    | 0.000195    | 27          | 0.000195     | 27          | TRUE         | TRUE              |
| 1     | NCYWPLNDY  | 473   | 481  | 9              | HLA-A*02:01 | 473           | 27             | NCYWPLNDY   | NCYWPLNDY   | 0.000195    | 27          | 0.000195     | 27          | TRUE         | TRUE              |
| 1     | GSFCTQLNR  | 739   | 747  | 9              | HLA-A*02:01 | 739           | 27             | GSFCTQLNR   | GSFCTQLNR   | 0.000193    | 27          | 0.000193     | 27          | TRUE         | TRUE              |
| 1     | TEVMPVMSMA | 706   | 714  | 9              | HLA-A*02:01 | 706           | 27             | TEVMPVMSMA  | TEVMPVMSMA  | 0.000193    | 27          | 0.000193     | 27          | TRUE         | TRUE              |
| 1     | VTILLCCMT  | 1212  | 1220 | 9              | HLA-A*02:01 | 1212          | 27             | VTILLCCMT   | VTILLCCMT   | 0.000192    | 27          | 0.000192     | 27          | TRUE         | TRUE              |
| 1     | LTPAWRIYS  | 615   | 623  | 9              | HLA-A*02:01 | 615           | 27             | LTPAWRIYS   | LTPAWRIYS   | 0.000191    | 27          | 0.000191     | 27          | TRUE         | TRUE              |
| 1     | KHLREFVFK  | 180   | 188  | 9              | HLA-A*02:01 | 180           | 27             | KHLREFVFK   | KHLREFVFK   | 0.00019     | 27          | 0.00019      | 27          | TRUE         | TRUE              |
| 1     | SFVVKGDV   | 386   | 394  | 9              | HLA-A*02:01 | 386           | 27             | SFVVKGDV    | SFVVKGDV    | 0.00019     | 27          | 0.00019      | 27          | TRUE         | TRUE              |
| 1     | TNLCPFGEV  | 320   | 328  | 9              | HLA-A*02:01 | 320           | 27             | TNLCPFGEV   | TNLCPFGEV   | 0.000187    | 27          | 0.000187     | 27          | TRUE         | TRUE              |
| 1     | TFKYGVSVA  | 363   | 371  | 9              | HLA-A*02:01 | 363           | 27             | TFKYGVSVA   | TFKYGVSVA   | 0.000185    | 27          | 0.000185     | 27          | TRUE         | TRUE              |
| 1     | TGIGYQPYR  | 487   | 495  | 9              | HLA-A*02:01 | 487           | 27             | TGIGYQPYR   | TGIGYQPYR   | 0.000184    | 27          | 0.000184     | 27          | TRUE         | TRUE              |
| 1     | CLIGAEHVD  | 635   | 643  | 9              | HLA-A*02:01 | 635           | 27             | CLIGAEHVD   | CLIGAEHVD   | 0.000182    | 27          | 0.000182     | 27          | TRUE         | TRUE              |
| 1     | ATEKSNVVR  | 91    | 99   | 9              | HLA-A*02:01 | 91            | 28             | ATEKSNVVR   | ATEKSNVVR   | 0.000177    | 28          | 0.000177     | 28          | TRUE         | TRUE              |
| 1     | GFNTUKPIF  | 212   | 220  | 9              | HLA-A*02:01 | 212           | 28             | GFNTUKPIF   | GFNTUKPIF   | 0.000177    | 28          | 0.000177     | 28          | TRUE         | TRUE              |
| 1     | GPKLSTDL   | 512   | 520  | 9              | HLA-A*02:01 | 512           | 28             | GPKLSTDL    | GPKLSTDL    | 0.000177    | 28          | 0.000177     | 28          | TRUE         | TRUE              |
| 1     | QTSNFRVVP  | 301   | 309  | 9              | HLA-A*02:01 | 301           | 28             | QTSNFRVVP   | QTSNFRVVP   | 0.000177    | 28          | 0.000177     | 28          | TRUE         | TRUE              |
| 1     | YEQYIKWPW  | 1188  | 1196 | 9              | HLA-A*02:01 | 1188          | 28             | YEQYIKWPW   | YEQYIKWPW   | 0.000176    | 28          | 0.000176     | 28          | TRUE         | TRUE              |
| 1     | IGAEHVDT   | 637   | 645  | 9              | HLA-A*02:01 | 637           | 28             | IGAEHVDT    | IGAEHVDT    | 0.000174    | 28          | 0.000174     | 28          | TRUE         | TRUE              |
| 1     | IGIINTVY   | 1112  | 1120 | 9              | HLA-A*02:01 | 1112          | 28             | IGIINTVY    | IGIINTVY    | 0.000174    | 28          | 0.000174     | 28          | TRUE         | TRUE              |
| 1     | APHGVVFLH  | 1038  | 1046 | 9              | HLA-A*02:01 | 1038          | 28             | APHGVVFLH   | APHGVVFLH   | 0.000171    | 28          | 0.000171     | 28          | TRUE         | TRUE              |
| 1     | FDDVQAPNY  | 22    | 30   | 9              | HLA-A*02:01 | 22            | 28             | FDDVQAPNY   | FDDVQAPNY   | 0.00017     | 28          | 0.00017      | 28          | TRUE         | TRUE              |
| 1     | GEVFNATKF  | 326   | 334  | 9              | HLA-A*02:01 | 326           | 28             | GEVFNATKF   | GEVFNATKF   | 0.000169    | 28          | 0.000169     | 28          | TRUE         | TRUE              |
| 1     | INARDLICA  | 826   | 834  | 9              | HLA-A*02:01 | 826           | 28             | INARDLICA   | INARDLICA   | 0.000168    | 28          | 0.000168     | 28          | TRUE         | TRUE              |
| 1     | KGIYQTSNF  | 297   | 305  | 9              | HLA-A*02:01 | 297           | 28             | KGIYQTSNF   | KGIYQTSNF   | 0.000168    | 28          | 0.000168     | 28          | TRUE         | TRUE              |
| 1     | KGYHLSFP   | 1027  | 1035 | 9              | HLA-A*02:01 | 1027          | 28             | KGYHLSFP    | KGYHLSFP    | 0.000167    | 28          | 0.000167     | 28          | TRUE         | TRUE              |
| 1     | KTSVDCNMY  | 715   | 723  | 9              | HLA-A*02:01 | 715           | 28             | KTSVDCNMY   | KTSVDCNMY   | 0.000167    | 28          | 0.000167     | 28          | TRUE         | TRUE              |
| 1     | VFNKDGFL   | 186   | 194  | 9              | HLA-A*02:01 | 186           | 28             | VFNKDGFL    | VFNKDGFL    | 0.000167    | 28          | 0.000167     | 28          | TRUE         | TRUE              |
| 1     | FDNAFNCTF  | 153   | 161  | 9              | HLA-A*02:01 | 153           | 28             | FDNAFNCTF   | FDNAFNCTF   | 0.000165    | 28          | 0.000165     | 28          | TRUE         | TRUE              |
| 1     | SLCKGACSC  | 1224  | 1232 | 9              | HLA-A*02:01 | 1224          | 29             | SLCKGACSC   | SLCKGACSC   | 0.000164    | 29          | 0.000164     | 29          | TRUE         | TRUE              |
| 1     | TTDNTFVSG  | 1098  | 1106 | 9              | HLA-A*02:01 | 1098          | 29             | TTDNTFVSG   | TTDNTFVSG   | 0.000164    | 29          | 0.000164     | 29          | TRUE         | TRUE              |
| 1     | IYSTGNVVF  | 621   | 629  | 9              | HLA-A*02:01 | 621           | 29             | IYSTGNVVF   | IYSTGNVVF   | 0.000163    | 29          | 0.000163     | 29          | TRUE         | TRUE              |
| 1     | VEAEQVIDR  | 969   | 977  | 9              | HLA-A*02:01 | 969           | 29             | VEAEQVIDR   | VEAEQVIDR   | 0.000163    | 29          | 0.000163     | 29          | TRUE         | TRUE              |
| 1     | ARDLICAQK  | 828   | 836  | 9              | HLA-A*02:01 | 828           | 29             | ARDLICAQK   | ARDLICAQK   | 0.000161    | 29          | 0.000161     | 29          | TRUE         | TRUE              |
| 1     | QVQMYKTP   | 766   | 774  | 9              | HLA-A*02:01 | 766           | 29             | QVQMYKTP    | QVQMYKTP    | 0.000161    | 29          | 0.000161     | 29          | TRUE         | TRUE              |
| 1     | DVSEKSGNF  | 171   | 179  | 9              | HLA-A*02:01 | 171           | 29             | DVSEKSGNF   | DVSEKSGNF   | 0.00016     | 29          | 0.00016      | 29          | TRUE         | TRUE              |
| 1     | GTGVLTPSS  | 534   | 542  | 9              | HLA-A*02:01 | 534           | 29             | GTGVLTPSS   | GTGVLTPSS   | 0.000158    | 29          | 0.000158     | 29          | TRUE         | TRUE              |
| 1     | AFSLDSEK   | 167   | 175  | 9              | HLA-A*02:01 | 167           | 29             | AFSLDSEK    | AFSLDSEK    | 0.000154    | 29          | 0.000154     | 29          | TRUE         | TRUE              |
| 1     | GNNVFQITQA | 625   | 633  | 9              | HLA-A*02:01 | 625           | 29             | GNNVFQITQA  | GNNVFQITQA  | 0.000153    | 29          | 0.000153     | 29          | TRUE         | TRUE              |
| 1     | SPDGRCPT   | 461   | 469  | 9              | HLA-A*02:01 | 461           | 29             | SPDGRCPT    | SPDGRCPT    | 0.000153    | 29          | 0.000153     | 29          | TRUE         | TRUE              |
| 1     | TVSLLRSTS  | 662   | 670  | 9              | HLA-A*02:01 | 662           | 29             | TVSLLRSTS   | TVSLLRSTS   | 0.000151    | 29          | 0.000151     | 29          | TRUE         | TRUE              |
| 1     | TDVSTAIHA  | 604   | 612  | 9              | HLA-A*02:01 | 604           | 29             | TDVSTAIHA   | TDVSTAIHA   | 0.00015     | 29          | 0.00015      | 29          | TRUE         | TRUE              |
| 1     | MVTLLCCM   | 1211  | 1219 | 9              | HLA-A*02:01 | 1211          | 29             | MVTLLCCM    | MVTLLCCM    | 0.000149    | 29          | 0.000149     | 29          | TRUE         | TRUE              |
| 1     | LLCMTSCC   | 1215  | 1223 | 9              | HLA-A*02:01 | 1215          | 30             | LLCMTSCC    | LLCMTSCC    | 0.000148    | 30          | 0.000148     | 30          | TRUE         | TRUE              |
| 1     | QELGKYEYQ  | 1183  | 1191 | 9              | HLA-A*02:01 | 1183          | 30             | QELGKYEYQ   | QELGKYEYQ   | 0.000148    | 30          | 0.000148     | 30          | TRUE         | TRUE              |
| 1     | LYKDENGTI  | 264   | 272  | 9              | HLA-A*02:01 | 264           | 30             | LYKDENGTI   | LYKDENGTI   | 0.000145    | 30          | 0.000145     | 30          | TRUE         | TRUE              |
| 1     | PFFSVNTGF  | 61    | 69   | 9              | HLA-A*02:01 | 61            | 30             | PFFSVNTGF   | PFFSVNTGF   | 0.000145    | 30          | 0.000145     | 30          | TRUE         | TRUE              |
| 1     | TTTSTALGK  | 921   | 929  | 9              | HLA-A*02:01 | 921           | 30             | TTTSTALGK   | TTTSTALGK   | 0.000145    | 30          | 0.000145     | 30          | TRUE         | TRUE              |
| 1     | GNVNYKYRY  | 434   | 442  | 9              | HLA-A*02:01 | 434           | 30             | GNVNYKYRY   | GNVNYKYRY   | 0.000144    | 30          | 0.000144     | 30          | TRUE         | TRUE              |
| 1     | VLPPLITDD  | 842   | 850  | 9              | HLA-A*02:01 | 842           | 30             | VLPPLITDD   | VLPPLITDD   | 0.000144    | 30          | 0.000144     | 30          | TRUE         | TRUE              |
| 1     | INNTVYDPL  | 1115  | 1123 | 9              | HLA-A*02:01 | 1115          | 30             | INNTVYDPL   | INNTVYDPL   | 0.000143    | 30          | 0.000143     | 30          | TRUE         | TRUE              |
| 1     | RDISNVFPS  | 453   | 461  | 9              | HLA-A*02:01 | 453           | 30             | RDISNVFPS   | RDISNVFPS   | 0.000143    | 30          | 0.000143     | 30          | TRUE         | TRUE              |
| 1     | VIPIFKDGIY | 80    | 88   | 9              | HLA-A*02:01 | 80            | 30             | VIPIFKDGIY  | VIPIFKDGIY  | 0.000143    | 30          | 0.000143     | 30          | TRUE         | TRUE              |
| 1     | VTGFHTINH  | 66    | 74   | 9              | HLA-A*02:01 | 66            | 30             | VTGFHTINH   | VTGFHTINH   | 0.000142    | 30          | 0.000142     | 30          | TRUE         | TRUE              |
| 1     | NHTSPDVL   | 1140  | 1148 | 9              | HLA-A*02:01 | 1140          | 30             | NHTSPDVL    | NHTSPDVL    | 0.000141    | 30          | 0.000141     | 30          | TRUE         | TRUE              |
| 1     | YTMISLGADS | 677   | 685  | 9              | HLA-A*02:01 | 677           | 30             | YTMISLGADS  | YTMISLGADS  | 0.000141    | 30          | 0.000141     | 30          | TRUE         | TRUE              |
| 1     | LKPIFKLPL  | 216   | 224  | 9              | HLA-A*02:01 | 216           | 30             | LKPIFKLPL   | LKPIFKLPL   | 0.00014     | 30          | 0.00014      | 30          | TRUE         | TRUE              |
| 1     | QDIWGTSA   | 242   | 250  | 9              | HLA-A*02:01 | 242           | 30             | QDIWGTSA    | QDIWGTSA    | 0.000138    | 30          | 0.000138     | 30          | TRUE         | TRUE              |
| 1     | RDLPSGFNT  | 207   | 215  | 9              | HLA-A*02:01 | 207           | 30             | RDLPSGFNT   | RDLPSGFNT   | 0.000136    | 30          | 0.000136     | 30          | TRUE         | TRUE              |
| 1     | RFQFPQFQG  | 544   | 552  | 9              | HLA-A*02:01 | 544           | 31             | RFQFPQFQG   | RFQFPQFQG   | 0.000133    | 31          | 0.000133     | 31          | TRUE         | TRUE              |
| 1     | TQQLIRAAE  | 991   | 999  | 9              | HLA-A*02:01 | 991           | 31             | TQQLIRAAE   | TQQLIRAAE   | 0.000133    | 31          | 0.000133     | 31          | TRUE         | TRUE              |
| 1     | IDRLITGRL  | 975   | 983  | 9              | HLA-A*02:01 | 975           | 31             | IDRLITGRL   | IDRLITGRL   | 0.000132    | 31          | 0.000132     | 31          | TRUE         | TRUE              |
| 1     | TSSMRGVVY  | 34    | 42   | 9              | HLA-A*02:01 | 34            | 31             | TSSMRGVVY   | TSSMRGVVY   | 0.000132    | 31          | 0.000132     | 31          | TRUE         | TRUE              |
| 1     | KQYGECLGD  | 817   | 825  | 9              | HLA-A*02:01 | 817           | 31             | KQYGECLGD   | KQYGECLGD   | 0.000131    | 31          | 0.000131     | 31          | TRUE         | TRUE              |
| 1     | QALNTLVKQ  | 939   | 947  | 9              | HLA-A*02:01 | 939           | 31             | QALNTLVKQ   | QALNTLVKQ   | 0.000131    | 31          | 0.000131     | 31          | TRUE         | TRUE              |
| 1     | QKSIAYVTM  | 671   | 679  | 9              | HLA-A*02:01 | 671           | 31             | QKSIAYVTM   | QKSIAYVTM   | 0.000131    | 31          | 0.000131     | 31          | TRUE         | TRUE              |
| 1     | ERDISNVFF  | 452   | 460  | 9              | HLA-A*02:01 | 452           | 31             | ERDISNVFF   | ERDISNVFF   | 0.00013     | 31          | 0.00013      | 31          | TRUE         | TRUE              |
| 1     | GDINARDLI  | 824   | 832  | 9              | HLA-A*02:01 | 824           | 31             | GDINARDLI   | GDINARDLI   | 0.00013     | 31</        |              |             |              |                   |

| seq # | peptide    | start | end  | peptide length | allele      | peptide index | median binding | netmhcan_el | netmhcan_el | netmhcan_el | netmhcan_el | legacy score | legacy rank | scores equal | percentiles equal |
|-------|------------|-------|------|----------------|-------------|---------------|----------------|-------------|-------------|-------------|-------------|--------------|-------------|--------------|-------------------|
| 1     | LIGAEHVD   | 636   | 644  | 9              | HLA-A*02:01 | 636           | 34             | LIGAEHVD    | LIGAEHVD    | 0.000104    | 34          | 0.000104     | 34          | TRUE         | TRUE              |
| 1     | STMNNKQS   | 105   | 113  | 9              | HLA-A*02:01 | 105           | 34             | STMNNKQS    | STMNNKQS    | 0.000103    | 34          | 0.000103     | 34          | TRUE         | TRUE              |
| 1     | LYNVTFFST  | 355   | 363  | 9              | HLA-A*02:01 | 355           | 34             | LYNVTFFST   | LYNVTFFST   | 0.0001      | 34          | 0.0001       | 34          | TRUE         | TRUE              |
| 1     | VNCTDVS    | 601   | 609  | 9              | HLA-A*02:01 | 601           | 34             | VNCTDVS     | VNCTDVS     | 0.0001      | 34          | 0.0001       | 34          | TRUE         | TRUE              |
| 1     | LRSTSQKSI  | 666   | 674  | 9              | HLA-A*02:01 | 666           | 34             | LRSTSQKSI   | LRSTSQKSI   | 0.000099    | 34          | 9.90E-05     | 34          | TRUE         | TRUE              |
| 1     | NASVNNIQK  | 1155  | 1163 | 9              | HLA-A*02:01 | 1155          | 34             | NASVNNIQK   | NASVNNIQK   | 0.000099    | 34          | 9.90E-05     | 34          | TRUE         | TRUE              |
| 1     | NGLTGTGVL  | 530   | 538  | 9              | HLA-A*02:01 | 530           | 34             | NGLTGTGVL   | NGLTGTGVL   | 0.000099    | 34          | 9.90E-05     | 34          | TRUE         | TRUE              |
| 1     | PCSGGGVSV  | 575   | 583  | 9              | HLA-A*02:01 | 575           | 34             | PCSGGGVSV   | PCSGGGVSV   | 0.000098    | 34          | 9.80E-05     | 34          | TRUE         | TRUE              |
| 1     | TGVLTPSSK  | 535   | 543  | 9              | HLA-A*02:01 | 535           | 34             | TGVLTPSSK   | TGVLTPSSK   | 0.000097    | 34          | 9.70E-05     | 34          | TRUE         | TRUE              |
| 1     | QPYRVVVL   | 492   | 500  | 9              | HLA-A*02:01 | 492           | 34             | QPYRVVVL    | QPYRVVVL    | 0.000096    | 34          | 9.60E-05     | 34          | TRUE         | TRUE              |
| 1     | FLTLTSGSD  | 7     | 15   | 9              | HLA-A*02:01 | 7             | 34             | FLTLTSGSD   | FLTLTSGSD   | 0.000095    | 34          | 9.50E-05     | 34          | TRUE         | TRUE              |
| 1     | YSTGNVVFQ  | 622   | 630  | 9              | HLA-A*02:01 | 622           | 34             | YSTGNVVFQ   | YSTGNVVFQ   | 0.000095    | 34          | 9.50E-05     | 34          | TRUE         | TRUE              |
| 1     | QSLQTVYVQ  | 984   | 992  | 9              | HLA-A*02:01 | 984           | 35             | QSLQTVYVQ   | QSLQTVYVQ   | 0.000094    | 35          | 9.40E-05     | 35          | TRUE         | TRUE              |
| 1     | TSNFRVVP   | 302   | 310  | 9              | HLA-A*02:01 | 302           | 35             | TSNFRVVP    | TSNFRVVP    | 0.000093    | 35          | 9.30E-05     | 35          | TRUE         | TRUE              |
| 1     | LKVFGGFNF  | 776   | 784  | 9              | HLA-A*02:01 | 776           | 35             | LKVFGGFNF   | LKVFGGFNF   | 0.000092    | 35          | 9.20E-05     | 35          | TRUE         | TRUE              |
| 1     | PALNCYWPL  | 470   | 478  | 9              | HLA-A*02:01 | 470           | 35             | PALNCYWPL   | PALNCYWPL   | 0.000091    | 35          | 9.00E-05     | 35          | TRUE         | TRUE              |
| 1     | YTTTGIGYQ  | 484   | 492  | 9              | HLA-A*02:01 | 484           | 35             | YTTTGIGYQ   | YTTTGIGYQ   | 0.000091    | 35          | 9.00E-05     | 35          | TRUE         | TRUE              |
| 1     | ERKISNCV   | 341   | 349  | 9              | HLA-A*02:01 | 341           | 35             | ERKISNCV    | ERKISNCV    | 0.000089    | 35          | 8.90E-05     | 35          | TRUE         | TRUE              |
| 1     | DLOELGKYE  | 1181  | 1189 | 9              | HLA-A*02:01 | 1181          | 35             | DLOELGKYE   | DLOELGKYE   | 0.000088    | 35          | 8.80E-05     | 35          | TRUE         | TRUE              |
| 1     | GSDLDRCTT  | 13    | 21   | 9              | HLA-A*02:01 | 13            | 35             | GSDLDRCTT   | GSDLDRCTT   | 0.000088    | 35          | 8.80E-05     | 35          | TRUE         | TRUE              |
| 1     | SCCSCLKGA  | 1221  | 1229 | 9              | HLA-A*02:01 | 1221          | 35             | SCCSCLKGA   | SCCSCLKGA   | 0.000088    | 35          | 8.80E-05     | 35          | TRUE         | TRUE              |
| 1     | LTSGSDLR   | 10    | 18   | 9              | HLA-A*02:01 | 10            | 36             | LTSGSDLR    | LTSGSDLR    | 0.000086    | 36          | 8.60E-05     | 36          | TRUE         | TRUE              |
| 1     | FERDISNP   | 451   | 459  | 9              | HLA-A*02:01 | 451           | 36             | FERDISNP    | FERDISNP    | 0.000085    | 36          | 8.50E-05     | 36          | TRUE         | TRUE              |
| 1     | FGEVFNATK  | 325   | 333  | 9              | HLA-A*02:01 | 325           | 36             | FGEVFNATK   | FGEVFNATK   | 0.000085    | 36          | 8.50E-05     | 36          | TRUE         | TRUE              |
| 1     | GDSTECANL  | 726   | 734  | 9              | HLA-A*02:01 | 726           | 36             | GDSTECANL   | GDSTECANL   | 0.000085    | 36          | 8.50E-05     | 36          | TRUE         | TRUE              |
| 1     | TKRSFIEDL  | 795   | 803  | 9              | HLA-A*02:01 | 795           | 36             | TKRSFIEDL   | TKRSFIEDL   | 0.000085    | 36          | 8.50E-05     | 36          | TRUE         | TRUE              |
| 1     | NFSQILPDP  | 783   | 791  | 9              | HLA-A*02:01 | 783           | 36             | NFSQILPDP   | NFSQILPDP   | 0.000084    | 36          | 8.40E-05     | 36          | TRUE         | TRUE              |
| 1     | QHTSSMRGV  | 32    | 40   | 9              | HLA-A*02:01 | 32            | 36             | QHTSSMRGV   | QHTSSMRGV   | 0.000084    | 36          | 8.40E-05     | 36          | TRUE         | TRUE              |
| 1     | CGPKLSTDL  | 511   | 519  | 9              | HLA-A*02:01 | 511           | 36             | CGPKLSTDL   | CGPKLSTDL   | 0.000083    | 36          | 8.30E-05     | 36          | TRUE         | TRUE              |
| 1     | YNNKLPDDF  | 408   | 416  | 9              | HLA-A*02:01 | 408           | 36             | YNNKLPDDF   | YNNKLPDDF   | 0.000082    | 36          | 8.20E-05     | 36          | TRUE         | TRUE              |
| 1     | AGICASYHT  | 654   | 662  | 9              | HLA-A*02:01 | 654           | 36             | AGICASYHT   | AGICASYHT   | 0.000081    | 36          | 8.10E-05     | 36          | TRUE         | TRUE              |
| 1     | TITDAVDCS  | 271   | 279  | 9              | HLA-A*02:01 | 271           | 36             | TITDAVDCS   | TITDAVDCS   | 0.000081    | 36          | 8.10E-05     | 36          | TRUE         | TRUE              |
| 1     | DDMIAAYTA  | 849   | 857  | 9              | HLA-A*02:01 | 849           | 36             | DDMIAAYTA   | DDMIAAYTA   | 0.00008     | 36          | 8.00E-05     | 36          | TRUE         | TRUE              |
| 1     | VSEKGNFK   | 172   | 180  | 9              | HLA-A*02:01 | 172           | 36             | VSEKGNFK    | VSEKGNFK    | 0.00008     | 36          | 8.00E-05     | 36          | TRUE         | TRUE              |
| 1     | ASVNNIQKE  | 1156  | 1164 | 9              | HLA-A*02:01 | 1156          | 37             | ASVNNIQKE   | ASVNNIQKE   | 0.000079    | 37          | 7.90E-05     | 37          | TRUE         | TRUE              |
| 1     | DVQAPNYTQ  | 24    | 32   | 9              | HLA-A*02:01 | 24            | 37             | DVQAPNYTQ   | DVQAPNYTQ   | 0.000079    | 37          | 7.90E-05     | 37          | TRUE         | TRUE              |
| 1     | FSPQIITD   | 1092  | 1100 | 9              | HLA-A*02:01 | 1092          | 37             | FSPQIITD    | FSPQIITD    | 0.000078    | 37          | 7.80E-05     | 37          | TRUE         | TRUE              |
| 1     | TMIFDNAFN  | 150   | 158  | 9              | HLA-A*02:01 | 150           | 37             | TMIFDNAFN   | TMIFDNAFN   | 0.000078    | 37          | 7.80E-05     | 37          | TRUE         | TRUE              |
| 1     | VVLVSFELLN | 497   | 505  | 9              | HLA-A*02:01 | 497           | 37             | VVLVSFELLN  | VVLVSFELLN  | 0.000078    | 37          | 7.80E-05     | 37          | TRUE         | TRUE              |
| 1     | HGKLRPFER  | 445   | 453  | 9              | HLA-A*02:01 | 445           | 37             | HGKLRPFER   | HGKLRPFER   | 0.000077    | 37          | 7.70E-05     | 37          | TRUE         | TRUE              |
| 1     | ITDAVDCSQ  | 272   | 280  | 9              | HLA-A*02:01 | 272           | 37             | ITDAVDCSQ   | ITDAVDCSQ   | 0.000075    | 37          | 7.50E-05     | 37          | TRUE         | TRUE              |
| 1     | TYVTQQLIR  | 988   | 996  | 9              | HLA-A*02:01 | 988           | 37             | TYVTQQLIR   | TYVTQQLIR   | 0.000075    | 37          | 7.50E-05     | 37          | TRUE         | TRUE              |
| 1     | HTSPVDVLG  | 1141  | 1149 | 9              | HLA-A*02:01 | 1141          | 37             | HTSPVDVLG   | HTSPVDVLG   | 0.000074    | 37          | 7.40E-05     | 37          | TRUE         | TRUE              |
| 1     | LSTDLIKNQ  | 515   | 523  | 9              | HLA-A*02:01 | 515           | 37             | LSTDLIKNQ   | LSTDLIKNQ   | 0.000074    | 37          | 7.40E-05     | 37          | TRUE         | TRUE              |
| 1     | WFITQRNFF  | 1084  | 1092 | 9              | HLA-A*02:01 | 1084          | 37             | WFITQRNFF   | WFITQRNFF   | 0.000074    | 37          | 7.40E-05     | 37          | TRUE         | TRUE              |
| 1     | SECVLGQSK  | 1012  | 1020 | 9              | HLA-A*02:01 | 1012          | 38             | SECVLGQSK   | SECVLGQSK   | 0.000073    | 38          | 7.30E-05     | 38          | TRUE         | TRUE              |
| 1     | WVFGSTMNN  | 101   | 109  | 9              | HLA-A*02:01 | 101           | 38             | WVFGSTMNN   | WVFGSTMNN   | 0.000073    | 38          | 7.30E-05     | 38          | TRUE         | TRUE              |
| 1     | DINARDLIC  | 825   | 833  | 9              | HLA-A*02:01 | 825           | 38             | DINARDLIC   | DINARDLIC   | 0.000072    | 38          | 7.20E-05     | 38          | TRUE         | TRUE              |
| 1     | DVVRFPNIT  | 312   | 320  | 9              | HLA-A*02:01 | 312           | 38             | DVVRFPNIT   | DVVRFPNIT   | 0.000072    | 38          | 7.20E-05     | 38          | TRUE         | TRUE              |
| 1     | LRHGKLRPF  | 443   | 451  | 9              | HLA-A*02:01 | 443           | 38             | LRHGKLRPF   | LRHGKLRPF   | 0.000072    | 38          | 7.20E-05     | 38          | TRUE         | TRUE              |
| 1     | SFIEDLLFN  | 798   | 806  | 9              | HLA-A*02:01 | 798           | 38             | SFIEDLLFN   | SFIEDLLFN   | 0.000072    | 38          | 7.20E-05     | 38          | TRUE         | TRUE              |
| 1     | TQRNFFSPQ  | 1087  | 1095 | 9              | HLA-A*02:01 | 1087          | 38             | TQRNFFSPQ   | TQRNFFSPQ   | 0.000072    | 38          | 7.20E-05     | 38          | TRUE         | TRUE              |
| 1     | DFMGCVLAW  | 415   | 423  | 9              | HLA-A*02:01 | 415           | 38             | DFMGCVLAW   | DFMGCVLAW   | 0.000071    | 38          | 7.10E-05     | 38          | TRUE         | TRUE              |
| 1     | HTSSMRGVY  | 33    | 41   | 9              | HLA-A*02:01 | 33            | 38             | HTSSMRGVY   | HTSSMRGVY   | 0.000071    | 38          | 7.10E-05     | 38          | TRUE         | TRUE              |
| 1     | AKNLNESU   | 1172  | 1180 | 9              | HLA-A*02:01 | 1172          | 38             | AKNLNESU    | AKNLNESU    | 0.00007     | 38          | 7.00E-05     | 38          | TRUE         | TRUE              |
| 1     | IVAYTMSLG  | 674   | 682  | 9              | HLA-A*02:01 | 674           | 38             | IVAYTMSLG   | IVAYTMSLG   | 0.00007     | 38          | 7.00E-05     | 38          | TRUE         | TRUE              |
| 1     | LGINTNFR   | 224   | 232  | 9              | HLA-A*02:01 | 224           | 38             | LGINTNFR    | LGINTNFR    | 0.00007     | 38          | 7.00E-05     | 38          | TRUE         | TRUE              |
| 1     | VRFGICGVT  | 886   | 894  | 9              | HLA-A*02:01 | 886           | 38             | VRFGICGVT   | VRFGICGVT   | 0.000067    | 38          | 6.70E-05     | 38          | TRUE         | TRUE              |
| 1     | ELCDINAR   | 821   | 829  | 9              | HLA-A*02:01 | 821           | 39             | ELCDINAR    | ELCDINAR    | 0.000067    | 39          | 6.70E-05     | 39          | TRUE         | TRUE              |
| 1     | EKSGNFHKL  | 174   | 182  | 9              | HLA-A*02:01 | 174           | 39             | EKSGNFHKL   | EKSGNFHKL   | 0.000067    | 39          | 6.70E-05     | 39          | TRUE         | TRUE              |
| 1     | NVPFSPDGK  | 457   | 465  | 9              | HLA-A*02:01 | 457           | 39             | NVPFSPDGK   | NVPFSPDGK   | 0.000067    | 39          | 6.70E-05     | 39          | TRUE         | TRUE              |
| 1     | WERKXISNC  | 340   | 348  | 9              | HLA-A*02:01 | 340           | 39             | WERKXISNC   | WERKXISNC   | 0.000067    | 39          | 6.70E-05     | 39          | TRUE         | TRUE              |
| 1     | TGTGVLTPS  | 533   | 541  | 9              | HLA-A*02:01 | 533           | 39             | TGTGVLTPS   | TGTGVLTPS   | 0.000066    | 39          | 6.60E-05     | 39          | TRUE         | TRUE              |
| 1     | VVKGDVVRQ  | 388   | 396  | 9              | HLA-A*02:01 | 388           | 39             | VVKGDVVRQ   | VVKGDVVRQ   | 0.000066    | 39          | 6.60E-05     | 39          | TRUE         | TRUE              |
| 1     | GKGVYHLMF  | 1026  | 1034 | 9              | HLA-A*02:01 | 1026          | 39             | GKGVYHLMF   | GKGVYHLMF   | 0.000065    | 39          | 6.50E-05     | 39          | TRUE         | TRUE              |
| 1     | PFERDISNV  | 450   | 458  | 9              | HLA-A*02:01 | 450           | 39             | PFERDISNV   | PFERDISNV   | 0.000065    | 39          | 6.50E-05     | 39          | TRUE         | TRUE              |
| 1     | TSEILDISP  | 567   | 575  | 9              | HLA-A*02:01 | 567           | 39             | TSEILDISP   | TSEILDISP   | 0.000065    | 39          | 6.50E-05     | 39          | TRUE         | TRUE              |
| 1     | VVIRACNFE  | 123   | 131  | 9              | HLA-A*02:01 | 123           | 39             | VVIRACNFE   | VVIRACNFE   | 0.000065    | 39          | 6.50E-05     | 39          | TRUE         | TRUE              |
| 1     | SSVLNDILS  | 956   | 964  | 9              | HLA-A*02:01 | 956           | 39             | SSVLNDILS   | SSVLNDILS   | 0.000064    | 39          | 6.40E-05     | 39          | TRUE         | TRUE              |
| 1     | STFKCYGVS  | 362   | 370  | 9              | HLA-A*02:01 | 362           | 39             | STFKCYGVS   | STFKCYGVS   | 0.000064    | 39          | 6.40E-05     | 39          | TRUE         | TRUE              |
| 1     | VSGTATAGW  | 860   | 868  | 9              | HLA-A*02:01 | 860           | 39             | VSGTATAGW   | VSGTATAGW   | 0.000064    | 39          | 6.40E-05     | 39          | TRUE         | TRUE              |
| 1     | LKPTTFMLK  | 257   | 265  | 9              | HLA-A*02:01 | 257           | 39             | LKPTTFMLK   | LKPTTFMLK   | 0.000063    | 39          | 6.30E-05     | 39          | TRUE         | TRUE              |
| 1     | PSQERNFTT  | 1051  | 1059 | 9              | HLA-A*02:01 | 1051          | 39             | PSQERNFTT   | PSQERNFTT   | 0.000063    | 39          | 6.30E-05     | 39          | TRUE         | TRUE              |
| 1     | PLVKGVKLH  | 1245  | 1253 | 9              | HLA-A*02:01 | 1245          | 39             | PLVKGVKLH   | PLVKGVKLH   | 0.000063    | 39          | 6.30E-05     | 39          | TRUE         | TRUE              |
| 1     | RDLCAQKPF  | 829   | 837  | 9              | HLA-A*02:01 | 829           | 39             | RDLCAQKPF   | RDLCAQKPF   | 0.000063    | 39          | 6.30E-05     | 39          | TRUE         | TRUE              |
| 1     | CTDVSIAIH  | 603   | 611  | 9              | HLA-A*02:01 | 603           | 40             | CTDVSIAIH   | CTDVSIAIH   | 0.000062    | 40          | 6.20E-05     | 40          | TRUE         | TRUE              |
| 1     | DGPKCTPPA  | 463   | 471  | 9              | HLA-A*02:01 | 463           | 40             | DGPKCTPPA   | DGPKCTPPA   | 0.000062    | 40          | 6.20E-05     | 40          | TRUE         | TRUE              |
| 1     | SPDVLGDI   | 1143  | 1151 | 9              | HLA-A*02:01 | 1143          | 40             | SPDVLGDI    | SPDVLGDI    | 0.000062    | 40          | 6.20E-05     | 40          | TRUE         | TRUE              |
| 1     | FYSNVTGFH  | 62    | 70   | 9              | HLA-A*02:01 | 62            | 40             | FYSNVTGFH   | FYSNVTGFH   | 0.000061    | 40          | 6.10E-05     | 40          | TRUE         | TRUE              |
| 1     | SMRGVYYPD  | 36    | 44   | 9              | HLA-A*02:01 | 36            | 40             | SMRGVYYPD   | SMRGVYYPD   | 0.000061    | 40          | 6.10E-05     | 40          | TRUE         | TRUE              |
| 1     | IYFAATEKS  | 87    | 95   | 9              | HLA-A*02:01 | 87            | 40             | IYFAATEKS   | IYFAATEKS   | 0.00006     | 40          | 6.00E-05     | 40          | TRUE         | TRUE              |
| 1     | KSIVAYTMS  | 672   | 680  | 9              | HLA-A*02:01 | 672           | 40             | KSIVAYTMS   | KSIVAYTMS   | 0.00006     | 40          | 6.00E-05     | 40          | TRUE         | TRUE              |
| 1     | NAPATVCGP  | 505   | 513  | 9              | HLA-A*02:01 | 505           | 40             | NAPATVCGP   | NAPATVCGP   | 0.000059    | 40          | 5.90E-05     | 40          | TRUE         | TRUE              |
| 1     | GFMKQYGEC  | 814   | 822  | 9              | HLA-A*02:01 | 814           | 41             | GFMKQYGEC   | GFMKQYGEC   | 0.000057    | 41          | 5.70E-05     | 41          | TRUE         | TRUE              |
| 1     | ISQIQESLT  | 913   | 921  | 9              | HLA-A*02:01 | 913           | 41             | ISQIQESLT   | ISQIQESLT   | 0.000057    | 41          |              |             |              |                   |

| seq # | peptide    | start | end  | peptide length | allele      | peptide index | median binding | netmhcpan_el | netmhcpan_el | netmhcpan_el | netmhcpan_el | legacy score | legacy rank | scores equal | percentiles equal |
|-------|------------|-------|------|----------------|-------------|---------------|----------------|--------------|--------------|--------------|--------------|--------------|-------------|--------------|-------------------|
| 1     | NPFVAVSKP  | 135   | 143  | 9              | HLA-A*02:01 | 135           | 44             | NPFVAVSKP    | NPFVAVSKP    | 0.000046     | 44           | 4.60E-05     | 44          | TRUE         | TRUE              |
| 1     | PATVCGPKL  | 507   | 515  | 9              | HLA-A*02:01 | 507           | 44             | PATVCGPKL    | PATVCGPKL    | 0.000046     | 44           | 4.60E-05     | 44          | TRUE         | TRUE              |
| 1     | ICASYHTVS  | 656   | 664  | 9              | HLA-A*02:01 | 656           | 44             | ICASYHTVS    | ICASYHTVS    | 0.000045     | 44           | 4.50E-05     | 44          | TRUE         | TRUE              |
| 1     | KWPVYVWLG  | 1193  | 1201 | 9              | HLA-A*02:01 | 1193          | 44             | KWPVYVWLG    | KWPVYVWLG    | 0.000045     | 44           | 4.50E-05     | 44          | TRUE         | TRUE              |
| 1     | TLTSGSLD   | 9     | 17   | 9              | HLA-A*02:01 | 9             | 44             | TLTSGSLD     | TLTSGSLD     | 0.000045     | 44           | 4.50E-05     | 44          | TRUE         | TRUE              |
| 1     | TQNVLLENQ  | 894   | 902  | 9              | HLA-A*02:01 | 894           | 44             | TQNVLLENQ    | TQNVLLENQ    | 0.000045     | 44           | 4.50E-05     | 44          | TRUE         | TRUE              |
| 1     | FMGCVLAWN  | 416   | 424  | 9              | HLA-A*02:01 | 416           | 44             | FMGCVLAWN    | FMGCVLAWN    | 0.000044     | 44           | 4.40E-05     | 44          | TRUE         | TRUE              |
| 1     | LAELKCSVK  | 283   | 291  | 9              | HLA-A*02:01 | 283           | 44             | LAELKCSVK    | LAELKCSVK    | 0.000044     | 44           | 4.40E-05     | 44          | TRUE         | TRUE              |
| 1     | LVSGTATAG  | 859   | 867  | 9              | HLA-A*02:01 | 859           | 44             | LVSGTATAG    | LVSGTATAG    | 0.000044     | 44           | 4.40E-05     | 44          | TRUE         | TRUE              |
| 1     | SEKSGNFKH  | 173   | 181  | 9              | HLA-A*02:01 | 173           | 44             | SEKSGNFKH    | SEKSGNFKH    | 0.000044     | 44           | 4.40E-05     | 44          | TRUE         | TRUE              |
| 1     | CCMTSCSCS  | 1217  | 1225 | 9              | HLA-A*02:01 | 1217          | 44             | CCMTSCSCS    | CCMTSCSCS    | 0.000043     | 44           | 4.30E-05     | 44          | TRUE         | TRUE              |
| 1     | GDISGINAS  | 1149  | 1157 | 9              | HLA-A*02:01 | 1149          | 44             | GDISGINAS    | GDISGINAS    | 0.000043     | 44           | 4.30E-05     | 44          | TRUE         | TRUE              |
| 1     | SKPMGTQTH  | 141   | 149  | 9              | HLA-A*02:01 | 141           | 44             | SKPMGTQTH    | SKPMGTQTH    | 0.000043     | 44           | 4.30E-05     | 44          | TRUE         | TRUE              |
| 1     | TAPAICHEG  | 1059  | 1067 | 9              | HLA-A*02:01 | 1059          | 44             | TAPAICHEG    | TAPAICHEG    | 0.000043     | 44           | 4.30E-05     | 44          | TRUE         | TRUE              |
| 1     | EVQIDRLIT  | 972   | 980  | 9              | HLA-A*02:01 | 972           | 45             | EVQIDRLIT    | EVQIDRLIT    | 0.000042     | 45           | 4.20E-05     | 45          | TRUE         | TRUE              |
| 1     | HTINHTFGN  | 70    | 78   | 9              | HLA-A*02:01 | 70            | 45             | HTINHTFGN    | HTINHTFGN    | 0.000042     | 45           | 4.20E-05     | 45          | TRUE         | TRUE              |
| 1     | TSGSLDRLC  | 11    | 19   | 9              | HLA-A*02:01 | 11            | 45             | TSGSLDRLC    | TSGSLDRLC    | 0.000042     | 45           | 4.20E-05     | 45          | TRUE         | TRUE              |
| 1     | WPMVYVWLG  | 1194  | 1202 | 9              | HLA-A*02:01 | 1194          | 45             | WPMVYVWLG    | WPMVYVWLG    | 0.000042     | 45           | 4.20E-05     | 45          | TRUE         | TRUE              |
| 1     | YPDEIFRSD  | 42    | 50   | 9              | HLA-A*02:01 | 42            | 45             | YPDEIFRSD    | YPDEIFRSD    | 0.000042     | 45           | 4.20E-05     | 45          | TRUE         | TRUE              |
| 1     | DVNCITDVST | 600   | 608  | 9              | HLA-A*02:01 | 600           | 45             | DVNCITDVST   | DVNCITDVST   | 0.000041     | 45           | 4.10E-05     | 45          | TRUE         | TRUE              |
| 1     | FEYISDAFS  | 161   | 169  | 9              | HLA-A*02:01 | 161           | 45             | FEYISDAFS    | FEYISDAFS    | 0.000041     | 45           | 4.10E-05     | 45          | TRUE         | TRUE              |
| 1     | KNQCYNFNF  | 521   | 529  | 9              | HLA-A*02:01 | 521           | 45             | KNQCYNFNF    | KNQCYNFNF    | 0.000041     | 45           | 4.10E-05     | 45          | TRUE         | TRUE              |
| 1     | QNPLAELKC  | 280   | 288  | 9              | HLA-A*02:01 | 280           | 45             | QNPLAELKC    | QNPLAELKC    | 0.000041     | 45           | 4.10E-05     | 45          | TRUE         | TRUE              |
| 1     | AWNTRNIDA  | 422   | 430  | 9              | HLA-A*02:01 | 422           | 45             | AWNTRNIDA    | AWNTRNIDA    | 0.00004      | 45           | 4.00E-05     | 45          | TRUE         | TRUE              |
| 1     | PFFAVSKPM  | 136   | 144  | 9              | HLA-A*02:01 | 136           | 45             | PFFAVSKPM    | PFFAVSKPM    | 0.00004      | 45           | 4.00E-05     | 45          | TRUE         | TRUE              |
| 1     | VADYSVLN   | 349   | 357  | 9              | HLA-A*02:01 | 349           | 45             | VADYSVLN     | VADYSVLN     | 0.00004      | 45           | 4.00E-05     | 45          | TRUE         | TRUE              |
| 1     | AGCLIGAEH  | 633   | 641  | 9              | HLA-A*02:01 | 633           | 46             | AGCLIGAEH    | AGCLIGAEH    | 0.000039     | 46           | 3.90E-05     | 46          | TRUE         | TRUE              |
| 1     | IDLQELGKY  | 1180  | 1188 | 9              | HLA-A*02:01 | 1180          | 46             | IDLQELGKY    | IDLQELGKY    | 0.000039     | 46           | 3.90E-05     | 46          | TRUE         | TRUE              |
| 1     | ITNLCPFGE  | 319   | 327  | 9              | HLA-A*02:01 | 319           | 46             | ITNLCPFGE    | ITNLCPFGE    | 0.000039     | 46           | 3.90E-05     | 46          | TRUE         | TRUE              |
| 1     | LVYVKGYPQ  | 194   | 202  | 9              | HLA-A*02:01 | 194           | 46             | LVYVKGYPQ    | LVYVKGYPQ    | 0.000039     | 46           | 3.90E-05     | 46          | TRUE         | TRUE              |
| 1     | NTRNIDATS  | 424   | 432  | 9              | HLA-A*02:01 | 424           | 46             | NTRNIDATS    | NTRNIDATS    | 0.000039     | 46           | 3.90E-05     | 46          | TRUE         | TRUE              |
| 1     | TQHTSSMRG  | 31    | 39   | 9              | HLA-A*02:01 | 31            | 46             | TQHTSSMRG    | TQHTSSMRG    | 0.000039     | 46           | 3.90E-05     | 46          | TRUE         | TRUE              |
| 1     | IRACNFC    | 125   | 133  | 9              | HLA-A*02:01 | 125           | 46             | IRACNFC      | IRACNFC      | 0.000038     | 46           | 3.80E-05     | 46          | TRUE         | TRUE              |
| 1     | PCTPPALNC  | 466   | 474  | 9              | HLA-A*02:01 | 466           | 46             | PCTPPALNC    | PCTPPALNC    | 0.000038     | 46           | 3.80E-05     | 46          | TRUE         | TRUE              |
| 1     | TTGIGYQPY  | 486   | 494  | 9              | HLA-A*02:01 | 486           | 46             | TTGIGYQPY    | TTGIGYQPY    | 0.000038     | 46           | 3.80E-05     | 46          | TRUE         | TRUE              |
| 1     | GFLYVYKGY  | 192   | 200  | 9              | HLA-A*02:01 | 192           | 47             | GFLYVYKGY    | GFLYVYKGY    | 0.000037     | 47           | 3.70E-05     | 47          | TRUE         | TRUE              |
| 1     | IWGTSAAY   | 244   | 252  | 9              | HLA-A*02:01 | 244           | 47             | IWGTSAAY     | IWGTSAAY     | 0.000037     | 47           | 3.70E-05     | 47          | TRUE         | TRUE              |
| 1     | KGACSCGSC  | 1227  | 1235 | 9              | HLA-A*02:01 | 1227          | 47             | KGACSCGSC    | KGACSCGSC    | 0.000037     | 47           | 3.70E-05     | 47          | TRUE         | TRUE              |
| 1     | NNSTNVVIR  | 118   | 126  | 9              | HLA-A*02:01 | 118           | 47             | NNSTNVVIR    | NNSTNVVIR    | 0.000037     | 47           | 3.70E-05     | 47          | TRUE         | TRUE              |
| 1     | TPSKRFQFP  | 539   | 547  | 9              | HLA-A*02:01 | 539           | 47             | TPSKRFQFP    | TPSKRFQFP    | 0.000037     | 47           | 3.70E-05     | 47          | TRUE         | TRUE              |
| 1     | DAVDCSQNP  | 274   | 282  | 9              | HLA-A*02:01 | 274           | 47             | DAVDCSQNP    | DAVDCSQNP    | 0.000036     | 47           | 3.60E-05     | 47          | TRUE         | TRUE              |
| 1     | GCVLAWNTR  | 418   | 426  | 9              | HLA-A*02:01 | 418           | 47             | GCVLAWNTR    | GCVLAWNTR    | 0.000036     | 47           | 3.60E-05     | 47          | TRUE         | TRUE              |
| 1     | NRALSGIAA  | 746   | 754  | 9              | HLA-A*02:01 | 746           | 47             | NRALSGIAA    | NRALSGIAA    | 0.000036     | 47           | 3.60E-05     | 47          | TRUE         | TRUE              |
| 1     | DVVRDPSG   | 204   | 212  | 9              | HLA-A*02:01 | 204           | 47             | DVVRDPSG     | DVVRDPSG     | 0.000035     | 47           | 3.50E-05     | 47          | TRUE         | TRUE              |
| 1     | TFDDVQAPN  | 21    | 29   | 9              | HLA-A*02:01 | 21            | 47             | TFDDVQAPN    | TFDDVQAPN    | 0.000035     | 47           | 3.50E-05     | 47          | TRUE         | TRUE              |
| 1     | FRAITAFS   | 231   | 239  | 9              | HLA-A*02:01 | 231           | 48             | FRAITAFS     | FRAITAFS     | 0.000034     | 48           | 3.40E-05     | 48          | TRUE         | TRUE              |
| 1     | WGTSAAYF   | 245   | 253  | 9              | HLA-A*02:01 | 245           | 48             | WGTSAAYF     | WGTSAAYF     | 0.000034     | 48           | 3.40E-05     | 48          | TRUE         | TRUE              |
| 1     | DRNTREVFA  | 757   | 765  | 9              | HLA-A*02:01 | 757           | 48             | DRNTREVFA    | DRNTREVFA    | 0.000033     | 48           | 3.30E-05     | 48          | TRUE         | TRUE              |
| 1     | LFLLTSGS   | 6     | 14   | 9              | HLA-A*02:01 | 6             | 48             | LFLLTSGS     | LFLLTSGS     | 0.000033     | 48           | 3.30E-05     | 48          | TRUE         | TRUE              |
| 1     | VTQNVLYEN  | 893   | 901  | 9              | HLA-A*02:01 | 893           | 48             | VTQNVLYEN    | VTQNVLYEN    | 0.000033     | 48           | 3.30E-05     | 48          | TRUE         | TRUE              |
| 1     | CTQLNRALS  | 742   | 750  | 9              | HLA-A*02:01 | 742           | 49             | CTQLNRALS    | CTQLNRALS    | 0.000032     | 49           | 3.20E-05     | 49          | TRUE         | TRUE              |
| 1     | KPTLKYFG   | 772   | 780  | 9              | HLA-A*02:01 | 772           | 49             | KPTLKYFG     | KPTLKYFG     | 0.000032     | 49           | 3.20E-05     | 49          | TRUE         | TRUE              |
| 1     | VPSPDGPKP  | 458   | 466  | 9              | HLA-A*02:01 | 458           | 49             | VPSPDGPKP    | VPSPDGPKP    | 0.000032     | 49           | 3.20E-05     | 49          | TRUE         | TRUE              |
| 1     | VPSQERNFT  | 1050  | 1058 | 9              | HLA-A*02:01 | 1050          | 49             | VPSQERNFT    | VPSQERNFT    | 0.000032     | 49           | 3.20E-05     | 49          | TRUE         | TRUE              |
| 1     | YHTVSLRS   | 660   | 668  | 9              | HLA-A*02:01 | 660           | 49             | YHTVSLRS     | YHTVSLRS     | 0.000032     | 49           | 3.20E-05     | 49          | TRUE         | TRUE              |
| 1     | AKTSVDCNM  | 714   | 722  | 9              | HLA-A*02:01 | 714           | 49             | AKTSVDCNM    | AKTSVDCNM    | 0.000031     | 49           | 3.10E-05     | 49          | TRUE         | TRUE              |
| 1     | DSFKEJLQK  | 1128  | 1136 | 9              | HLA-A*02:01 | 1128          | 49             | DSFKEJLQK    | DSFKEJLQK    | 0.000031     | 49           | 3.10E-05     | 49          | TRUE         | TRUE              |
| 1     | LOGLKIKQD  | 1182  | 1190 | 9              | HLA-A*02:01 | 1182          | 49             | LOGLKIKQD    | LOGLKIKQD    | 0.000031     | 49           | 3.10E-05     | 49          | TRUE         | TRUE              |
| 1     | NETTAPAC   | 1056  | 1064 | 9              | HLA-A*02:01 | 1056          | 49             | NETTAPAC     | NETTAPAC     | 0.000031     | 49           | 3.10E-05     | 49          | TRUE         | TRUE              |
| 1     | PTLYKFGGF  | 774   | 782  | 9              | HLA-A*02:01 | 774           | 49             | PTLYKFGGF    | PTLYKFGGF    | 0.000031     | 49           | 3.10E-05     | 49          | TRUE         | TRUE              |
| 1     | QESLTTTST  | 917   | 925  | 9              | HLA-A*02:01 | 917           | 49             | QESLTTTST    | QESLTTTST    | 0.000031     | 49           | 3.10E-05     | 49          | TRUE         | TRUE              |
| 1     | DVDLGDISG  | 1145  | 1153 | 9              | HLA-A*02:01 | 1145          | 49             | DVDLGDISG    | DVDLGDISG    | 0.00003      | 49           | 3.00E-05     | 49          | TRUE         | TRUE              |
| 1     | NFISITTE   | 699   | 707  | 9              | HLA-A*02:01 | 699           | 49             | NFISITTE     | NFISITTE     | 0.00003      | 49           | 3.00E-05     | 49          | TRUE         | TRUE              |
| 1     | QERNFTTAP  | 1053  | 1061 | 9              | HLA-A*02:01 | 1053          | 49             | QERNFTTAP    | QERNFTTAP    | 0.00003      | 49           | 3.00E-05     | 49          | TRUE         | TRUE              |
| 1     | SGSLDRCT   | 12    | 20   | 9              | HLA-A*02:01 | 12            | 49             | SGSLDRCT     | SGSLDRCT     | 0.00003      | 49           | 3.00E-05     | 49          | TRUE         | TRUE              |
| 1     | THTMIFDNA  | 148   | 156  | 9              | HLA-A*02:01 | 148           | 49             | THTMIFDNA    | THTMIFDNA    | 0.00003      | 49           | 3.00E-05     | 49          | TRUE         | TRUE              |
| 1     | NGTSWFIQT  | 1080  | 1088 | 9              | HLA-A*02:01 | 1080          | 50             | NGTSWFIQT    | NGTSWFIQT    | 0.000029     | 50           | 2.90E-05     | 50          | TRUE         | TRUE              |
| 1     | PSGDVVRFP  | 309   | 317  | 9              | HLA-A*02:01 | 309           | 50             | PSGDVVRFP    | PSGDVVRFP    | 0.000029     | 50           | 2.90E-05     | 50          | TRUE         | TRUE              |
| 1     | TDDMAAYT   | 848   | 856  | 9              | HLA-A*02:01 | 848           | 50             | TDDMAAYT     | TDDMAAYT     | 0.000029     | 50           | 2.90E-05     | 50          | TRUE         | TRUE              |
| 1     | EDDSEPVLK  | 1240  | 1248 | 9              | HLA-A*02:01 | 1240          | 50             | EDDSEPVLK    | EDDSEPVLK    | 0.000028     | 50           | 2.80E-05     | 50          | TRUE         | TRUE              |
| 1     | FFAVSKPMG  | 137   | 145  | 9              | HLA-A*02:01 | 137           | 50             | FFAVSKPMG    | FFAVSKPMG    | 0.000028     | 50           | 2.80E-05     | 50          | TRUE         | TRUE              |
| 1     | LGKYEYQIK  | 1185  | 1193 | 9              | HLA-A*02:01 | 1185          | 50             | LGKYEYQIK    | LGKYEYQIK    | 0.000028     | 50           | 2.80E-05     | 50          | TRUE         | TRUE              |
| 1     | QFGRDVSDF  | 550   | 558  | 9              | HLA-A*02:01 | 550           | 50             | QFGRDVSDF    | QFGRDVSDF    | 0.000028     | 50           | 2.80E-05     | 50          | TRUE         | TRUE              |
| 1     | REVFAQVKQ  | 761   | 769  | 9              | HLA-A*02:01 | 761           | 50             | REVFAQVKQ    | REVFAQVKQ    | 0.000028     | 50           | 2.80E-05     | 50          | TRUE         | TRUE              |
| 1     | VDCSQNPLA  | 276   | 284  | 9              | HLA-A*02:01 | 276           | 50             | VDCSQNPLA    | VDCSQNPLA    | 0.000028     | 50           | 2.80E-05     | 50          | TRUE         | TRUE              |
| 1     | CAQKFNGLT  | 833   | 841  | 9              | HLA-A*02:01 | 833           | 51             | CAQKFNGLT    | CAQKFNGLT    | 0.000027     | 51           | 2.70E-05     | 51          | TRUE         | TRUE              |
| 1     | CSGSCCKF   | 1230  | 1238 | 9              | HLA-A*02:01 | 1230          | 51             | CSGSCCKF     | CSGSCCKF     | 0.000027     | 51           | 2.70E-05     | 51          | TRUE         | TRUE              |
| 1     | DNPFVAVSK  | 134   | 142  | 9              | HLA-A*02:01 | 134           | 51             | DNPFVAVSK    | DNPFVAVSK    | 0.000027     | 51           | 2.70E-05     | 51          | TRUE         | TRUE              |
| 1     | EKSNNVRGW  | 93    | 101  | 9              | HLA-A*02:01 | 93            | 51             | EKSNNVRGW    | EKSNNVRGW    | 0.000027     | 51           | 2.70E-05     | 51          | TRUE         | TRUE              |
| 1     | KSQSVIIN   | 110   | 118  | 9              | HLA-A*02:01 | 110           | 51             | KSQSVIIN     | KSQSVIIN     | 0.000027     | 51           | 2.70E-05     | 51          | TRUE         | TRUE              |
| 1     | LGQSKRVDF  | 1016  | 1024 | 9              | HLA-A*02:01 | 1016          | 51             | LGQSKRVDF    | LGQSKRVDF    | 0.000027     | 51           | 2.70E-05     | 51          | TRUE         | TRUE              |
| 1     | PIDVVRDLP  | 202   | 210  | 9              | HLA-A*02:01 | 202           | 51             | PIDVVRDLP    | PIDVVRDLP    | 0.000027     | 51           | 2.70E-05     | 51          | TRUE         | TRUE              |
| 1     | SSKRFQPFQ  | 541   | 549  | 9              | HLA-A*02:01 | 541           | 51             | SSKRFQPFQ    | SSKRFQPFQ    | 0.000027     | 51           | 2.70E-05     | 51          | TRUE         | TRUE              |
| 1     | STALGKLQD  | 924   | 932  | 9              | HLA-A*02:01 | 924           | 51             | STALGKLQD    | STALGKLQD    | 0.000027     | 51           | 2.70E-05     | 51          | TRUE         | TRUE              |
| 1     | TQTHMIFD   | 146   | 154  | 9              | HLA-A*02:01 | 146           | 51</           |              |              |              |              |              |             |              |                   |

| seq # | peptide    | start | end  | peptide length | allele      | peptide index | median binding | netmhcpan_el | netmhcpan_el | netmhcpan_el | netmhcpan_el | legacy score | legacy rank | scores equal | percentiles equal |
|-------|------------|-------|------|----------------|-------------|---------------|----------------|--------------|--------------|--------------|--------------|--------------|-------------|--------------|-------------------|
| 1     | SSEAVLVYQ  | 591   | 599  | 9              | HLA-A*02:01 | 591           | 55             | SSEAVLVYQ    | SSEAVLVYQ    | 0.000021     | 55           | 2.10E-05     | 55          | TRUE         | TRUE              |
| 1     | TGNVYNYKYR | 433   | 441  | 9              | HLA-A*02:01 | 433           | 55             | TGNVYNYKYR   | TGNVYNYKYR   | 0.000021     | 55           | 2.10E-05     | 55          | TRUE         | TRUE              |
| 1     | VFNATKFPSP | 328   | 336  | 9              | HLA-A*02:01 | 328           | 55             | VFNATKFPSP   | VFNATKFPSP   | 0.000021     | 55           | 2.10E-05     | 55          | TRUE         | TRUE              |
| 1     | DIPGAGIC   | 649   | 657  | 9              | HLA-A*02:01 | 649           | 55             | DIPGAGIC     | DIPGAGIC     | 0.00002      | 55           | 2.00E-05     | 55          | TRUE         | TRUE              |
| 1     | RNIDATSTG  | 426   | 434  | 9              | HLA-A*02:01 | 426           | 55             | RNIDATSTG    | RNIDATSTG    | 0.00002      | 55           | 2.00E-05     | 55          | TRUE         | TRUE              |
| 1     | TSPDVLGD   | 1142  | 1150 | 9              | HLA-A*02:01 | 1142          | 55             | TSPDVLGD     | TSPDVLGD     | 0.00002      | 55           | 2.00E-05     | 55          | TRUE         | TRUE              |
| 1     | AELKCSVK   | 284   | 292  | 9              | HLA-A*02:01 | 284           | 56             | AELKCSVK     | AELKCSVK     | 0.000019     | 56           | 1.90E-05     | 56          | TRUE         | TRUE              |
| 1     | DVSTAIHAD  | 605   | 613  | 9              | HLA-A*02:01 | 605           | 56             | DVSTAIHAD    | DVSTAIHAD    | 0.000019     | 56           | 1.90E-05     | 56          | TRUE         | TRUE              |
| 1     | ERNFTTAPA  | 1054  | 1062 | 9              | HLA-A*02:01 | 1054          | 56             | ERNFTTAPA    | ERNFTTAPA    | 0.000019     | 56           | 1.90E-05     | 56          | TRUE         | TRUE              |
| 1     | FPNITNLC   | 316   | 324  | 9              | HLA-A*02:01 | 316           | 56             | FPNITNLC     | FPNITNLC     | 0.000019     | 56           | 1.90E-05     | 56          | TRUE         | TRUE              |
| 1     | FSPAQDIWG  | 238   | 246  | 9              | HLA-A*02:01 | 238           | 56             | FSPAQDIWG    | FSPAQDIWG    | 0.000019     | 56           | 1.90E-05     | 56          | TRUE         | TRUE              |
| 1     | GAISSVLND  | 953   | 961  | 9              | HLA-A*02:01 | 953           | 56             | GAISSVLND    | GAISSVLND    | 0.000019     | 56           | 1.90E-05     | 56          | TRUE         | TRUE              |
| 1     | GDDVRQIAP  | 391   | 399  | 9              | HLA-A*02:01 | 391           | 56             | GDDVRQIAP    | GDDVRQIAP    | 0.000019     | 56           | 1.90E-05     | 56          | TRUE         | TRUE              |
| 1     | IDKGIYQTS  | 295   | 303  | 9              | HLA-A*02:01 | 295           | 56             | IDKGIYQTS    | IDKGIYQTS    | 0.000019     | 56           | 1.90E-05     | 56          | TRUE         | TRUE              |
| 1     | KDGLFLVYK  | 190   | 198  | 9              | HLA-A*02:01 | 190           | 56             | KDGLFLVYK    | KDGLFLVYK    | 0.000019     | 56           | 1.90E-05     | 56          | TRUE         | TRUE              |
| 1     | KFPSVYAYE  | 333   | 341  | 9              | HLA-A*02:01 | 333           | 56             | KFPSVYAYE    | KFPSVYAYE    | 0.000019     | 56           | 1.90E-05     | 56          | TRUE         | TRUE              |
| 1     | LTAFSPAQD  | 235   | 243  | 9              | HLA-A*02:01 | 235           | 56             | LTAFSPAQD    | LTAFSPAQD    | 0.000019     | 56           | 1.90E-05     | 56          | TRUE         | TRUE              |
| 1     | LYENKQKIA  | 898   | 906  | 9              | HLA-A*02:01 | 898           | 56             | LYENKQKIA    | LYENKQKIA    | 0.000019     | 56           | 1.90E-05     | 56          | TRUE         | TRUE              |
| 1     | NIDATSTGN  | 427   | 435  | 9              | HLA-A*02:01 | 427           | 56             | NIDATSTGN    | NIDATSTGN    | 0.000019     | 56           | 1.90E-05     | 56          | TRUE         | TRUE              |
| 1     | PWYVWLGI   | 1195  | 1203 | 9              | HLA-A*02:01 | 1195          | 56             | PWYVWLGI     | PWYVWLGI     | 0.000019     | 56           | 1.90E-05     | 56          | TRUE         | TRUE              |
| 1     | PYRVVLSF   | 493   | 501  | 9              | HLA-A*02:01 | 493           | 56             | PYRVVLSF     | PYRVVLSF     | 0.000019     | 56           | 1.90E-05     | 56          | TRUE         | TRUE              |
| 1     | TGVIADYNY  | 402   | 410  | 9              | HLA-A*02:01 | 402           | 56             | TGVIADYNY    | TGVIADYNY    | 0.000019     | 56           | 1.90E-05     | 56          | TRUE         | TRUE              |
| 1     | TREVFADQV  | 760   | 768  | 9              | HLA-A*02:01 | 760           | 56             | TREVFADQV    | TREVFADQV    | 0.000019     | 56           | 1.90E-05     | 56          | TRUE         | TRUE              |
| 1     | ITFMKLKYE  | 260   | 268  | 9              | HLA-A*02:01 | 260           | 56             | ITFMKLKYE    | ITFMKLKYE    | 0.000019     | 56           | 1.90E-05     | 56          | TRUE         | TRUE              |
| 1     | ANLLQYGS   | 732   | 740  | 9              | HLA-A*02:01 | 732           | 57             | ANLLQYGS     | ANLLQYGS     | 0.000018     | 57           | 1.80E-05     | 57          | TRUE         | TRUE              |
| 1     | HEGKAYFPR  | 1065  | 1073 | 9              | HLA-A*02:01 | 1065          | 57             | HEGKAYFPR    | HEGKAYFPR    | 0.000018     | 57           | 1.80E-05     | 57          | TRUE         | TRUE              |
| 1     | LTSPSKRFQ  | 538   | 546  | 9              | HLA-A*02:01 | 538           | 57             | LTSPSKRFQ    | LTSPSKRFQ    | 0.000018     | 57           | 1.80E-05     | 57          | TRUE         | TRUE              |
| 1     | TSWFIQTORN | 1082  | 1090 | 9              | HLA-A*02:01 | 1082          | 57             | TSWFIQTORN   | TSWFIQTORN   | 0.000018     | 57           | 1.80E-05     | 57          | TRUE         | TRUE              |
| 1     | ADQLTPAWR  | 612   | 620  | 9              | HLA-A*02:01 | 612           | 58             | ADQLTPAWR    | ADQLTPAWR    | 0.000017     | 58           | 1.70E-05     | 58          | TRUE         | TRUE              |
| 1     | DGFLVYVYG  | 191   | 199  | 9              | HLA-A*02:01 | 191           | 58             | DGFLVYVYG    | DGFLVYVYG    | 0.000017     | 58           | 1.70E-05     | 58          | TRUE         | TRUE              |
| 1     | FNFSQILPD  | 782   | 790  | 9              | HLA-A*02:01 | 782           | 58             | FNFSQILPD    | FNFSQILPD    | 0.000017     | 58           | 1.70E-05     | 58          | TRUE         | TRUE              |
| 1     | LHVTVPSPQ  | 1045  | 1053 | 9              | HLA-A*02:01 | 1045          | 58             | LHVTVPSPQ    | LHVTVPSPQ    | 0.000017     | 58           | 1.70E-05     | 58          | TRUE         | TRUE              |
| 1     | MSECVLGOS  | 1011  | 1019 | 9              | HLA-A*02:01 | 1011          | 58             | MSECVLGOS    | MSECVLGOS    | 0.000017     | 58           | 1.70E-05     | 58          | TRUE         | TRUE              |
| 1     | NITNLCPPG  | 318   | 326  | 9              | HLA-A*02:01 | 318           | 58             | NITNLCPPG    | NITNLCPPG    | 0.000017     | 58           | 1.70E-05     | 58          | TRUE         | TRUE              |
| 1     | QDRNTRFV   | 756   | 764  | 9              | HLA-A*02:01 | 756           | 58             | QDRNTRFV     | QDRNTRFV     | 0.000017     | 58           | 1.70E-05     | 58          | TRUE         | TRUE              |
| 1     | TLKYGGGFN  | 775   | 783  | 9              | HLA-A*02:01 | 775           | 58             | TLKYGGGFN    | TLKYGGGFN    | 0.000017     | 58           | 1.70E-05     | 58          | TRUE         | TRUE              |
| 1     | AMQMAYFRN  | 881   | 889  | 9              | HLA-A*02:01 | 881           | 59             | AMQMAYFRN    | AMQMAYFRN    | 0.000016     | 59           | 1.60E-05     | 59          | TRUE         | TRUE              |
| 1     | DENGTTIDA  | 267   | 275  | 9              | HLA-A*02:01 | 267           | 59             | DENGTTIDA    | DENGTTIDA    | 0.000016     | 59           | 1.60E-05     | 59          | TRUE         | TRUE              |
| 1     | DKYFNKHTS  | 1135  | 1143 | 9              | HLA-A*02:01 | 1135          | 59             | DKYFNKHTS    | DKYFNKHTS    | 0.000016     | 59           | 1.60E-05     | 59          | TRUE         | TRUE              |
| 1     | LRFVFNK    | 182   | 190  | 9              | HLA-A*02:01 | 182           | 59             | LRFVFNK      | LRFVFNK      | 0.000016     | 59           | 1.60E-05     | 59          | TRUE         | TRUE              |
| 1     | NARDLICAQ  | 827   | 835  | 9              | HLA-A*02:01 | 827           | 59             | NARDLICAQ    | NARDLICAQ    | 0.000016     | 59           | 1.60E-05     | 59          | TRUE         | TRUE              |
| 1     | POITTDNT   | 1094  | 1102 | 9              | HLA-A*02:01 | 1094          | 59             | POITTDNT     | POITTDNT     | 0.000016     | 59           | 1.60E-05     | 59          | TRUE         | TRUE              |
| 1     | PSSKRFQPF  | 540   | 548  | 9              | HLA-A*02:01 | 540           | 59             | PSSKRFQPF    | PSSKRFQPF    | 0.000016     | 59           | 1.60E-05     | 59          | TRUE         | TRUE              |
| 1     | PTNFSISIT  | 697   | 705  | 9              | HLA-A*02:01 | 697           | 59             | PTNFSISIT    | PTNFSISIT    | 0.000016     | 59           | 1.60E-05     | 59          | TRUE         | TRUE              |
| 1     | QDLFLPFYS  | 56    | 64   | 9              | HLA-A*02:01 | 56            | 59             | QDLFLPFYS    | QDLFLPFYS    | 0.000016     | 59           | 1.60E-05     | 59          | TRUE         | TRUE              |
| 1     | VIINNSTN   | 114   | 122  | 9              | HLA-A*02:01 | 114           | 59             | VIINNSTN     | VIINNSTN     | 0.000016     | 59           | 1.60E-05     | 59          | TRUE         | TRUE              |
| 1     | DTSYECDIP  | 643   | 651  | 9              | HLA-A*02:01 | 643           | 60             | DTSYECDIP    | DTSYECDIP    | 0.000015     | 60           | 1.50E-05     | 60          | TRUE         | TRUE              |
| 1     | INASVVNIQ  | 1154  | 1162 | 9              | HLA-A*02:01 | 1154          | 60             | INASVVNIQ    | INASVVNIQ    | 0.000015     | 60           | 1.50E-05     | 60          | TRUE         | TRUE              |
| 1     | LPFYSNVGT  | 60    | 68   | 9              | HLA-A*02:01 | 60            | 60             | LPFYSNVGT    | LPFYSNVGT    | 0.000015     | 60           | 1.50E-05     | 60          | TRUE         | TRUE              |
| 1     | NFELCDNPF  | 129   | 137  | 9              | HLA-A*02:01 | 129           | 60             | NFELCDNPF    | NFELCDNPF    | 0.000015     | 60           | 1.50E-05     | 60          | TRUE         | TRUE              |
| 1     | TRNIDATST  | 425   | 433  | 9              | HLA-A*02:01 | 425           | 60             | TRNIDATST    | TRNIDATST    | 0.000015     | 60           | 1.50E-05     | 60          | TRUE         | TRUE              |
| 1     | VDTSYECDI  | 642   | 650  | 9              | HLA-A*02:01 | 642           | 60             | VDTSYECDI    | VDTSYECDI    | 0.000015     | 60           | 1.50E-05     | 60          | TRUE         | TRUE              |
| 1     | CYWPINDYG  | 474   | 482  | 9              | HLA-A*02:01 | 474           | 61             | CYWPINDYG    | CYWPINDYG    | 0.000014     | 61           | 1.40E-05     | 61          | TRUE         | TRUE              |
| 1     | DLKNQCYN   | 518   | 526  | 9              | HLA-A*02:01 | 518           | 61             | DLKNQCYN     | DLKNQCYN     | 0.000014     | 61           | 1.40E-05     | 61          | TRUE         | TRUE              |
| 1     | DYSVLNST   | 351   | 359  | 9              | HLA-A*02:01 | 351           | 61             | DYSVLNST     | DYSVLNST     | 0.000014     | 61           | 1.40E-05     | 61          | TRUE         | TRUE              |
| 1     | GKLDQVNVQ  | 928   | 936  | 9              | HLA-A*02:01 | 928           | 61             | GKLDQVNVQ    | GKLDQVNVQ    | 0.000014     | 61           | 1.40E-05     | 61          | TRUE         | TRUE              |
| 1     | ISNCVADYS  | 345   | 353  | 9              | HLA-A*02:01 | 345           | 61             | ISNCVADYS    | ISNCVADYS    | 0.000014     | 61           | 1.40E-05     | 61          | TRUE         | TRUE              |
| 1     | KEELDNVYK  | 1131  | 1139 | 9              | HLA-A*02:01 | 1131          | 61             | KEELDNVYK    | KEELDNVYK    | 0.000014     | 61           | 1.40E-05     | 61          | TRUE         | TRUE              |
| 1     | MTSCSCCLK  | 1219  | 1227 | 9              | HLA-A*02:01 | 1219          | 61             | MTSCSCCLK    | MTSCSCCLK    | 0.000014     | 61           | 1.40E-05     | 61          | TRUE         | TRUE              |
| 1     | PFOQGRDGV  | 547   | 555  | 9              | HLA-A*02:01 | 547           | 61             | PFOQGRDGV    | PFOQGRDGV    | 0.000014     | 61           | 1.40E-05     | 61          | TRUE         | TRUE              |
| 1     | PGTNASSEV  | 586   | 594  | 9              | HLA-A*02:01 | 586           | 61             | PGTNASSEV    | PGTNASSEV    | 0.000014     | 61           | 1.40E-05     | 61          | TRUE         | TRUE              |
| 1     | VLGOSKVRD  | 1015  | 1023 | 9              | HLA-A*02:01 | 1015          | 61             | VLGOSKVRD    | VLGOSKVRD    | 0.000014     | 61           | 1.40E-05     | 61          | TRUE         | TRUE              |
| 1     | APATVCGPK  | 506   | 514  | 9              | HLA-A*02:01 | 506           | 62             | APATVCGPK    | APATVCGPK    | 0.000013     | 62           | 1.30E-05     | 62          | TRUE         | TRUE              |
| 1     | DGIYFAATE  | 85    | 93   | 9              | HLA-A*02:01 | 85            | 62             | DGIYFAATE    | DGIYFAATE    | 0.000013     | 62           | 1.30E-05     | 62          | TRUE         | TRUE              |
| 1     | DPLKPTRKS  | 790   | 798  | 9              | HLA-A*02:01 | 790           | 62             | DPLKPTRKS    | DPLKPTRKS    | 0.000013     | 62           | 1.30E-05     | 62          | TRUE         | TRUE              |
| 1     | IQKIEDRLN  | 1161  | 1169 | 9              | HLA-A*02:01 | 1161          | 62             | IQKIEDRLN    | IQKIEDRLN    | 0.000013     | 62           | 1.30E-05     | 62          | TRUE         | TRUE              |
| 1     | IRAAEIRAS  | 995   | 1003 | 9              | HLA-A*02:01 | 995           | 62             | IRAAEIRAS    | IRAAEIRAS    | 0.000013     | 62           | 1.30E-05     | 62          | TRUE         | TRUE              |
| 1     | KYRVLRHGK  | 439   | 447  | 9              | HLA-A*02:01 | 439           | 62             | KYRVLRHGK    | KYRVLRHGK    | 0.000013     | 62           | 1.30E-05     | 62          | TRUE         | TRUE              |
| 1     | LFNKVTLAD  | 804   | 812  | 9              | HLA-A*02:01 | 804           | 62             | LFNKVTLAD    | LFNKVTLAD    | 0.000013     | 62           | 1.30E-05     | 62          | TRUE         | TRUE              |
| 1     | PDDFMGCVL  | 413   | 421  | 9              | HLA-A*02:01 | 413           | 62             | PDDFMGCVL    | PDDFMGCVL    | 0.000013     | 62           | 1.30E-05     | 62          | TRUE         | TRUE              |
| 1     | PPLITDDMI  | 844   | 852  | 9              | HLA-A*02:01 | 844           | 62             | PPLITDDMI    | PPLITDDMI    | 0.000013     | 62           | 1.30E-05     | 62          | TRUE         | TRUE              |
| 1     | PSGFNTLKP  | 210   | 218  | 9              | HLA-A*02:01 | 210           | 62             | PSGFNTLKP    | PSGFNTLKP    | 0.000013     | 62           | 1.30E-05     | 62          | TRUE         | TRUE              |
| 1     | QNVLYENQK  | 895   | 903  | 9              | HLA-A*02:01 | 895           | 62             | QNVLYENQK    | QNVLYENQK    | 0.000013     | 62           | 1.30E-05     | 62          | TRUE         | TRUE              |
| 1     | APACHEGK   | 1060  | 1068 | 9              | HLA-A*02:01 | 1060          | 63             | APACHEGK     | APACHEGK     | 0.000012     | 63           | 1.20E-05     | 63          | TRUE         | TRUE              |
| 1     | DDVQAPNYT  | 23    | 31   | 9              | HLA-A*02:01 | 23            | 63             | DDVQAPNYT    | DDVQAPNYT    | 0.000012     | 63           | 1.20E-05     | 63          | TRUE         | TRUE              |
| 1     | MYICGDSTE  | 722   | 730  | 9              | HLA-A*02:01 | 722           | 63             | MYICGDSTE    | MYICGDSTE    | 0.000012     | 63           | 1.20E-05     | 63          | TRUE         | TRUE              |
| 1     | QTQAGCLIG  | 630   | 638  | 9              | HLA-A*02:01 | 630           | 63             | QTQAGCLIG    | QTQAGCLIG    | 0.000012     | 63           | 1.20E-05     | 63          | TRUE         | TRUE              |
| 1     | QYGECLGDI  | 818   | 826  | 9              | HLA-A*02:01 | 818           | 63             | QYGECLGDI    | QYGECLGDI    | 0.000012     | 63           | 1.20E-05     | 63          | TRUE         | TRUE              |
| 1     | SEPLVKGVK  | 1243  | 1251 | 9              | HLA-A*02:01 | 1243          | 63             | SEPLVKGVK    | SEPLVKGVK    | 0.000012     | 63           | 1.20E-05     | 63          | TRUE         | TRUE              |
| 1     | CDNPFPAVS  | 133   | 141  | 9              | HLA-A*02:01 | 133           | 64             | CDNPFPAVS    | CDNPFPAVS    | 0.000011     | 64           | 1.10E-05     | 64          | TRUE         | TRUE              |
| 1     | CVLAWNTRN  | 419   | 427  | 9              | HLA-A*02:01 | 419           | 64             | CVLAWNTRN    | CVLAWNTRN    | 0.000011     | 64           | 1.10E-05     | 64          | TRUE         | TRUE              |
| 1     | DISPCSGGG  | 572   | 580  | 9              | HLA-A*02:01 | 572           | 64             | DISPCSGGG    | DISPCSGGG    | 0.000011     | 64           | 1.10E-05     | 64          | TRUE         | TRUE              |
| 1     | GACSCGSCC  | 1228  | 1236 | 9              | HLA-A*02:01 | 1228          | 64             | GACSCGSCC    | GACSCGSCC    | 0.000011     | 64           | 1.10E-05     | 64          | TRUE         | TRUE              |
| 1     | GGVSVITPG  | 579   | 587  | 9              | HLA-A*02:01 | 579           | 64             | GGVSVITPG    | GGVSVITPG    | 0.000011     | 64           | 1.10E-05     | 64          | TRUE         | TRUE              |
| 1     | NDILSLDLK  | 960   | 968  | 9              | HLA-A*02:01 | 960           | 64</           |              |              |              |              |              |             |              |                   |

| seq # | peptide    | start | end  | peptide length | allele      | peptide index | median binding | netmhcan_el | netmhcan_el | netmhcan_el | netmhcan_el | legacy score | legacy rank | scores equal | percentiles equal |
|-------|------------|-------|------|----------------|-------------|---------------|----------------|-------------|-------------|-------------|-------------|--------------|-------------|--------------|-------------------|
| 1     | VSTAIHADQ  | 606   | 614  | 9              | HLA-A*02:01 | 606           | 67             | VSTAIHADQ   | VSTAIHADQ   | 0.000009    | 67          | 9.00E-06     | 67          | TRUE         | TRUE              |
| 1     | AHVDTSYE   | 639   | 647  | 9              | HLA-A*02:01 | 639           | 69             | AHVDTSYE    | AHVDTSYE    | 0.000008    | 69          | 8.00E-06     | 69          | TRUE         | TRUE              |
| 1     | AEDQRNTR   | 754   | 762  | 9              | HLA-A*02:01 | 754           | 69             | AEDQRNTR    | AEDQRNTR    | 0.000008    | 69          | 8.00E-06     | 69          | TRUE         | TRUE              |
| 1     | CHEGKAYFP  | 1064  | 1072 | 9              | HLA-A*02:01 | 1064          | 69             | CHEGKAYFP   | CHEGKAYFP   | 0.000008    | 69          | 8.00E-06     | 69          | TRUE         | TRUE              |
| 1     | DVVGIIINN  | 1109  | 1117 | 9              | HLA-A*02:01 | 1109          | 69             | DVVGIIINN   | DVVGIIINN   | 0.000008    | 69          | 8.00E-06     | 69          | TRUE         | TRUE              |
| 1     | FNKAISQIQ  | 909   | 917  | 9              | HLA-A*02:01 | 909           | 69             | FNKAISQIQ   | FNKAISQIQ   | 0.000008    | 69          | 8.00E-06     | 69          | TRUE         | TRUE              |
| 1     | GAGICASYH  | 653   | 661  | 9              | HLA-A*02:01 | 653           | 69             | GAGICASYH   | GAGICASYH   | 0.000008    | 69          | 8.00E-06     | 69          | TRUE         | TRUE              |
| 1     | GFYTTTGIG  | 482   | 490  | 9              | HLA-A*02:01 | 482           | 69             | GFYTTTGIG   | GFYTTTGIG   | 0.000008    | 69          | 8.00E-06     | 69          | TRUE         | TRUE              |
| 1     | GSTMNNKSQ  | 104   | 112  | 9              | HLA-A*02:01 | 104           | 69             | GSTMNNKSQ   | GSTMNNKSQ   | 0.000008    | 69          | 8.00E-06     | 69          | TRUE         | TRUE              |
| 1     | HVDTSYECD  | 641   | 649  | 9              | HLA-A*02:01 | 641           | 69             | HVDTSYECD   | HVDTSYECD   | 0.000008    | 69          | 8.00E-06     | 69          | TRUE         | TRUE              |
| 1     | NFNFNGLTG  | 526   | 534  | 9              | HLA-A*02:01 | 526           | 69             | NFNFNGLTG   | NFNFNGLTG   | 0.000008    | 69          | 8.00E-06     | 69          | TRUE         | TRUE              |
| 1     | RHGKLRPFE  | 444   | 452  | 9              | HLA-A*02:01 | 444           | 69             | RHGKLRPFE   | RHGKLRPFE   | 0.000008    | 69          | 8.00E-06     | 69          | TRUE         | TRUE              |
| 1     | SGTATAGWT  | 861   | 869  | 9              | HLA-A*02:01 | 861           | 69             | SGTATAGWT   | SGTATAGWT   | 0.000008    | 69          | 8.00E-06     | 69          | TRUE         | TRUE              |
| 1     | TKINDLCFS  | 372   | 380  | 9              | HLA-A*02:01 | 372           | 69             | TKINDLCFS   | TKINDLCFS   | 0.000008    | 69          | 8.00E-06     | 69          | TRUE         | TRUE              |
| 1     | TSAAAYFVG  | 247   | 255  | 9              | HLA-A*02:01 | 247           | 69             | TSAAAYFVG   | TSAAAYFVG   | 0.000008    | 69          | 8.00E-06     | 69          | TRUE         | TRUE              |
| 1     | VSMAKTSVD  | 711   | 719  | 9              | HLA-A*02:01 | 711           | 69             | VSMAKTSVD   | VSMAKTSVD   | 0.000008    | 69          | 8.00E-06     | 69          | TRUE         | TRUE              |
| 1     | ACSGGSCCK  | 1229  | 1237 | 9              | HLA-A*02:01 | 1229          | 71             | ACSGGSCCK   | ACSGGSCCK   | 0.000007    | 71          | 7.00E-06     | 71          | TRUE         | TRUE              |
| 1     | ANLAATKMS  | 1004  | 1012 | 9              | HLA-A*02:01 | 1004          | 71             | ANLAATKMS   | ANLAATKMS   | 0.000007    | 71          | 7.00E-06     | 71          | TRUE         | TRUE              |
| 1     | CNFEILDNP  | 128   | 136  | 9              | HLA-A*02:01 | 128           | 71             | CNFEILDNP   | CNFEILDNP   | 0.000007    | 71          | 7.00E-06     | 71          | TRUE         | TRUE              |
| 1     | CSCLKGACS  | 1223  | 1231 | 9              | HLA-A*02:01 | 1223          | 71             | CSCLKGACS   | CSCLKGACS   | 0.000007    | 71          | 7.00E-06     | 71          | TRUE         | TRUE              |
| 1     | DCSQNPFLAE | 277   | 285  | 9              | HLA-A*02:01 | 277           | 71             | DCSQNPFLAE  | DCSQNPFLAE  | 0.000007    | 71          | 7.00E-06     | 71          | TRUE         | TRUE              |
| 1     | DLGDISGIN  | 1147  | 1155 | 9              | HLA-A*02:01 | 1147          | 71             | DLGDISGIN   | DLGDISGIN   | 0.000007    | 71          | 7.00E-06     | 71          | TRUE         | TRUE              |
| 1     | DRCTTFDDV  | 17    | 25   | 9              | HLA-A*02:01 | 17            | 71             | DRCTTFDDV   | DRCTTFDDV   | 0.000007    | 71          | 7.00E-06     | 71          | TRUE         | TRUE              |
| 1     | EDLFNKNYT  | 801   | 809  | 9              | HLA-A*02:01 | 801           | 71             | EDLFNKNYT   | EDLFNKNYT   | 0.000007    | 71          | 7.00E-06     | 71          | TRUE         | TRUE              |
| 1     | EGKAYFPRE  | 1066  | 1074 | 9              | HLA-A*02:01 | 1066          | 71             | EGKAYFPRE   | EGKAYFPRE   | 0.000007    | 71          | 7.00E-06     | 71          | TRUE         | TRUE              |
| 1     | FFSTFKCYG  | 360   | 368  | 9              | HLA-A*02:01 | 360           | 71             | FFSTFKCYG   | FFSTFKCYG   | 0.000007    | 71          | 7.00E-06     | 71          | TRUE         | TRUE              |
| 1     | FNCTFEYIS  | 157   | 165  | 9              | HLA-A*02:01 | 157           | 71             | FNCTFEYIS   | FNCTFEYIS   | 0.000007    | 71          | 7.00E-06     | 71          | TRUE         | TRUE              |
| 1     | NEVAKNLNE  | 1169  | 1177 | 9              | HLA-A*02:01 | 1169          | 71             | NEVAKNLNE   | NEVAKNLNE   | 0.000007    | 71          | 7.00E-06     | 71          | TRUE         | TRUE              |
| 1     | SEVAVLYQD  | 592   | 600  | 9              | HLA-A*02:01 | 592           | 71             | SEVAVLYQD   | SEVAVLYQD   | 0.000007    | 71          | 7.00E-06     | 71          | TRUE         | TRUE              |
| 1     | SGINASVVN  | 1152  | 1160 | 9              | HLA-A*02:01 | 1152          | 71             | SGINASVVN   | SGINASVVN   | 0.000007    | 71          | 7.00E-06     | 71          | TRUE         | TRUE              |
| 1     | TEKSNVVRG  | 92    | 100  | 9              | HLA-A*02:01 | 92            | 71             | TEKSNVVRG   | TEKSNVVRG   | 0.000007    | 71          | 7.00E-06     | 71          | TRUE         | TRUE              |
| 1     | VDFCGKGYH  | 1022  | 1030 | 9              | HLA-A*02:01 | 1022          | 71             | VDFCGKGYH   | VDFCGKGYH   | 0.000007    | 71          | 7.00E-06     | 71          | TRUE         | TRUE              |
| 1     | WPLNDYGFY  | 476   | 484  | 9              | HLA-A*02:01 | 476           | 71             | WPLNDYGFY   | WPLNDYGFY   | 0.000007    | 71          | 7.00E-06     | 71          | TRUE         | TRUE              |
| 1     | YENQKQIAN  | 899   | 907  | 9              | HLA-A*02:01 | 899           | 71             | YENQKQIAN   | YENQKQIAN   | 0.000007    | 71          | 7.00E-06     | 71          | TRUE         | TRUE              |
| 1     | YKLPDDFMG  | 410   | 418  | 9              | HLA-A*02:01 | 410           | 71             | YKLPDDFMG   | YKLPDDFMG   | 0.000007    | 71          | 7.00E-06     | 71          | TRUE         | TRUE              |
| 1     | DDSEPVKLG  | 1241  | 1249 | 9              | HLA-A*02:01 | 1241          | 73             | DDSEPVKLG   | DDSEPVKLG   | 0.000006    | 73          | 6.00E-06     | 73          | TRUE         | TRUE              |
| 1     | DPQLPELDS  | 1211  | 1219 | 9              | HLA-A*02:01 | 1211          | 73             | DPQLPELDS   | DPQLPELDS   | 0.000006    | 73          | 6.00E-06     | 73          | TRUE         | TRUE              |
| 1     | EELDKYFKN  | 1132  | 1140 | 9              | HLA-A*02:01 | 1132          | 73             | EELDKYFKN   | EELDKYFKN   | 0.000006    | 73          | 6.00E-06     | 73          | TRUE         | TRUE              |
| 1     | GIAAEQDRN  | 751   | 759  | 9              | HLA-A*02:01 | 751           | 73             | GIAAEQDRN   | GIAAEQDRN   | 0.000006    | 73          | 6.00E-06     | 73          | TRUE         | TRUE              |
| 1     | NTFVSGNCD  | 1101  | 1109 | 9              | HLA-A*02:01 | 1101          | 73             | NTFVSGNCD   | NTFVSGNCD   | 0.000006    | 73          | 6.00E-06     | 73          | TRUE         | TRUE              |
| 1     | PAQDIWGTG  | 240   | 248  | 9              | HLA-A*02:01 | 240           | 73             | PAQDIWGTG   | PAQDIWGTG   | 0.000006    | 73          | 6.00E-06     | 73          | TRUE         | TRUE              |
| 1     | PFAMQMAYR  | 879   | 887  | 9              | HLA-A*02:01 | 879           | 73             | PFAMQMAYR   | PFAMQMAYR   | 0.000006    | 73          | 6.00E-06     | 73          | TRUE         | TRUE              |
| 1     | SDAFSLDVS  | 165   | 173  | 9              | HLA-A*02:01 | 165           | 73             | SDAFSLDVS   | SDAFSLDVS   | 0.000006    | 73          | 6.00E-06     | 73          | TRUE         | TRUE              |
| 1     | VCGPKLSTD  | 510   | 518  | 9              | HLA-A*02:01 | 510           | 73             | VCGPKLSTD   | VCGPKLSTD   | 0.000006    | 73          | 6.00E-06     | 73          | TRUE         | TRUE              |
| 1     | ADDSIAYSN  | 683   | 691  | 9              | HLA-A*02:01 | 683           | 75             | ADDSIAYSN   | ADDSIAYSN   | 0.000005    | 75          | 5.00E-06     | 75          | TRUE         | TRUE              |
| 1     | CANLLQVYG  | 731   | 739  | 9              | HLA-A*02:01 | 731           | 75             | CANLLQVYG   | CANLLQVYG   | 0.000005    | 75          | 5.00E-06     | 75          | TRUE         | TRUE              |
| 1     | KPTKRSFIE  | 793   | 801  | 9              | HLA-A*02:01 | 793           | 75             | KPTKRSFIE   | KPTKRSFIE   | 0.000005    | 75          | 5.00E-06     | 75          | TRUE         | TRUE              |
| 1     | LAWNTRNID  | 421   | 429  | 9              | HLA-A*02:01 | 421           | 75             | LAWNTRNID   | LAWNTRNID   | 0.000005    | 75          | 5.00E-06     | 75          | TRUE         | TRUE              |
| 1     | LNRLALSGIA | 745   | 753  | 9              | HLA-A*02:01 | 745           | 75             | LNRLALSGIA  | LNRLALSGIA  | 0.000005    | 75          | 5.00E-06     | 75          | TRUE         | TRUE              |
| 1     | LNTLVKQLS  | 941   | 949  | 9              | HLA-A*02:01 | 941           | 75             | LNTLVKQLS   | LNTLVKQLS   | 0.000005    | 75          | 5.00E-06     | 75          | TRUE         | TRUE              |
| 1     | MAYRFNGIG  | 884   | 892  | 9              | HLA-A*02:01 | 884           | 75             | MAYRFNGIG   | MAYRFNGIG   | 0.000005    | 75          | 5.00E-06     | 75          | TRUE         | TRUE              |
| 1     | NKAISQIQE  | 910   | 918  | 9              | HLA-A*02:01 | 910           | 75             | NKAISQIQE   | NKAISQIQE   | 0.000005    | 75          | 5.00E-06     | 75          | TRUE         | TRUE              |
| 1     | NYKYRYLRH  | 437   | 445  | 9              | HLA-A*02:01 | 437           | 75             | NYKYRYLRH   | NYKYRYLRH   | 0.000005    | 75          | 5.00E-06     | 75          | TRUE         | TRUE              |
| 1     | PDLKPTKR   | 789   | 797  | 9              | HLA-A*02:01 | 789           | 75             | PDLKPTKR    | PDLKPTKR    | 0.000005    | 75          | 5.00E-06     | 75          | TRUE         | TRUE              |
| 1     | PFSPOGKPC  | 459   | 467  | 9              | HLA-A*02:01 | 459           | 75             | PFSPOGKPC   | PFSPOGKPC   | 0.000005    | 75          | 5.00E-06     | 75          | TRUE         | TRUE              |
| 1     | QCVNFMFNG  | 523   | 531  | 9              | HLA-A*02:01 | 523           | 75             | QCVNFMFNG   | QCVNFMFNG   | 0.000005    | 75          | 5.00E-06     | 75          | TRUE         | TRUE              |
| 1     | REGVIFVNG  | 1073  | 1081 | 9              | HLA-A*02:01 | 1073          | 75             | REGVIFVNG   | REGVIFVNG   | 0.000005    | 75          | 5.00E-06     | 75          | TRUE         | TRUE              |
| 1     | RKWSNCVYA  | 342   | 350  | 9              | HLA-A*02:01 | 342           | 75             | RKWSNCVYA   | RKWSNCVYA   | 0.000005    | 75          | 5.00E-06     | 75          | TRUE         | TRUE              |
| 1     | SDFDTSVVD  | 556   | 564  | 9              | HLA-A*02:01 | 556           | 75             | SDFDTSVVD   | SDFDTSVVD   | 0.000005    | 75          | 5.00E-06     | 75          | TRUE         | TRUE              |
| 1     | SGDVVRFPN  | 310   | 318  | 9              | HLA-A*02:01 | 310           | 75             | SGDVVRFPN   | SGDVVRFPN   | 0.000005    | 75          | 5.00E-06     | 75          | TRUE         | TRUE              |
| 1     | SKRFOPFQQ  | 542   | 550  | 9              | HLA-A*02:01 | 542           | 75             | SKRFOPFQQ   | SKRFOPFQQ   | 0.000005    | 75          | 5.00E-06     | 75          | TRUE         | TRUE              |
| 1     | SPCSFGGVG  | 574   | 582  | 9              | HLA-A*02:01 | 574           | 75             | SPCSFGGVG   | SPCSFGGVG   | 0.000005    | 75          | 5.00E-06     | 75          | TRUE         | TRUE              |
| 1     | VRQIAPGQT  | 394   | 402  | 9              | HLA-A*02:01 | 394           | 75             | VRQIAPGQT   | VRQIAPGQT   | 0.000005    | 75          | 5.00E-06     | 75          | TRUE         | TRUE              |
| 1     | VVNIQKEID  | 1158  | 1166 | 9              | HLA-A*02:01 | 1158          | 75             | VVNIQKEID   | VVNIQKEID   | 0.000005    | 75          | 5.00E-06     | 75          | TRUE         | TRUE              |
| 1     | YFAATEKSN  | 88    | 96   | 9              | HLA-A*02:01 | 88            | 75             | YFAATEKSN   | YFAATEKSN   | 0.000005    | 75          | 5.00E-06     | 75          | TRUE         | TRUE              |
| 1     | CFSNVYADS  | 378   | 386  | 9              | HLA-A*02:01 | 378           | 78             | CFSNVYADS   | CFSNVYADS   | 0.000004    | 78          | 4.00E-06     | 78          | TRUE         | TRUE              |
| 1     | DNTFVSGN   | 1100  | 1108 | 9              | HLA-A*02:01 | 1100          | 78             | DNTFVSGN    | DNTFVSGN    | 0.000004    | 78          | 4.00E-06     | 78          | TRUE         | TRUE              |
| 1     | ECDIPIGAG  | 647   | 655  | 9              | HLA-A*02:01 | 647           | 78             | ECDIPIGAG   | ECDIPIGAG   | 0.000004    | 78          | 4.00E-06     | 78          | TRUE         | TRUE              |
| 1     | GRDVSDFDT  | 552   | 560  | 9              | HLA-A*02:01 | 552           | 78             | GRDVSDFDT   | GRDVSDFDT   | 0.000004    | 78          | 4.00E-06     | 78          | TRUE         | TRUE              |
| 1     | LDKYFKNHT  | 1134  | 1142 | 9              | HLA-A*02:01 | 1134          | 78             | LDKYFKNHT   | LDKYFKNHT   | 0.000004    | 78          | 4.00E-06     | 78          | TRUE         | TRUE              |
| 1     | LNAPATVCG  | 504   | 512  | 9              | HLA-A*02:01 | 504           | 78             | LNAPATVCG   | LNAPATVCG   | 0.000004    | 78          | 4.00E-06     | 78          | TRUE         | TRUE              |
| 1     | LYQDVNCTD  | 597   | 605  | 9              | HLA-A*02:01 | 597           | 78             | LYQDVNCTD   | LYQDVNCTD   | 0.000004    | 78          | 4.00E-06     | 78          | TRUE         | TRUE              |
| 1     | NDLCSNVVY  | 375   | 383  | 9              | HLA-A*02:01 | 375           | 78             | NDLCSNVVY   | NDLCSNVVY   | 0.000004    | 78          | 4.00E-06     | 78          | TRUE         | TRUE              |
| 1     | PKLSTDLIK  | 513   | 521  | 9              | HLA-A*02:01 | 513           | 78             | PKLSTDLIK   | PKLSTDLIK   | 0.000004    | 78          | 4.00E-06     | 78          | TRUE         | TRUE              |
| 1     | PNITNLCPF  | 317   | 325  | 9              | HLA-A*02:01 | 317           | 78             | PNITNLCPF   | PNITNLCPF   | 0.000004    | 78          | 4.00E-06     | 78          | TRUE         | TRUE              |
| 1     | QTHTMIFDN  | 147   | 155  | 9              | HLA-A*02:01 | 147           | 78             | QTHTMIFDN   | QTHTMIFDN   | 0.000004    | 78          | 4.00E-06     | 78          | TRUE         | TRUE              |
| 1     | SNVPFSPDG  | 456   | 464  | 9              | HLA-A*02:01 | 456           | 78             | SNVPFSPDG   | SNVPFSPDG   | 0.000004    | 78          | 4.00E-06     | 78          | TRUE         | TRUE              |
| 1     | TATAGWTFG  | 863   | 871  | 9              | HLA-A*02:01 | 863           | 78             | TATAGWTFG   | TATAGWTFG   | 0.000004    | 78          | 4.00E-06     | 78          | TRUE         | TRUE              |
| 1     | VKQMYKTPT  | 767   | 775  | 9              | HLA-A*02:01 | 767           | 78             | VKQMYKTPT   | VKQMYKTPT   | 0.000004    | 78          | 4.00E-06     | 78          | TRUE         | TRUE              |
| 1     | VRGVWVFST  | 98    | 106  | 9              | HLA-A*02:01 | 98            | 78             | VRGVWVFST   | VRGVWVFST   | 0.000004    | 78          | 4.00E-06     | 78          | TRUE         | TRUE              |
| 1     | VSVITPGTN  | 581   | 589  | 9              | HLA-A*02:01 | 581           | 78             | VSVITPGTN   | VSVITPGTN   | 0.000004    | 78          | 4.00E-06     | 78          | TRUE         | TRUE              |
| 1     | DLICAQKFN  | 830   | 838  | 9              | HLA-A*02:01 | 830           | 82             | DLICAQKFN   | DLICAQKFN   | 0.000003    | 82          | 3.00E-06     | 82          | TRUE         | TRUE              |
| 1     | GYHLMSPFQ  | 1028  | 1036 | 9              | HLA-A*02:01 | 1028          | 82             | GYHLMSPFQ   | GYHLMSPFQ   | 0.000003    | 82          | 3.00E-06     | 82          | TRUE         | TRUE              |
| 1     | IDVVRDLPS  | 203   | 211  | 9              | HLA-A*02:01 | 203           | 82             | IDVVRDLPS   | IDVVRDLPS   | 0.000003    | 82          | 3.00E-06     | 82          | TRUE         | TRUE              |
| 1     | IFKLPLGIN  | 219   | 227  | 9              | HLA-A*      |               |                |             |             |             |             |              |             |              |                   |

| seq # | peptide    | start | end  | peptide length | allele      | peptide index | median binding | netmhcan_el | netmhcan_el | netmhcan_el | netmhcan_el | legacy score | legacy rank | scores equal | percentiles equal |
|-------|------------|-------|------|----------------|-------------|---------------|----------------|-------------|-------------|-------------|-------------|--------------|-------------|--------------|-------------------|
| 1     | PKTSEILD   | 565   | 573  | 9              | HLA-A*02:01 | 565           | 87             | PKTSEILD    | PKTSEILD    | 0.000002    | 87          | 2.00E-06     | 87          | TRUE         | TRUE              |
| 1     | PNYTHQTS   | 28    | 36   | 9              | HLA-A*02:01 | 28            | 87             | PNYTHQTS    | PNYTHQTS    | 0.000002    | 87          | 2.00E-06     | 87          | TRUE         | TRUE              |
| 1     | PPALNCYWP  | 469   | 477  | 9              | HLA-A*02:01 | 469           | 87             | PPALNCYWP   | PPALNCYWP   | 0.000002    | 87          | 2.00E-06     | 87          | TRUE         | TRUE              |
| 1     | QAGCLIGAE  | 632   | 640  | 9              | HLA-A*02:01 | 632           | 87             | QAGCLIGAE   | QAGCLIGAE   | 0.000002    | 87          | 2.00E-06     | 87          | TRUE         | TRUE              |
| 1     | QDVVNQNAQ  | 931   | 939  | 9              | HLA-A*02:01 | 931           | 87             | QDVVNQNAQ   | QDVVNQNAQ   | 0.000002    | 87          | 2.00E-06     | 87          | TRUE         | TRUE              |
| 1     | QPELDSFKE  | 1124  | 1132 | 9              | HLA-A*02:01 | 1124          | 87             | QPELDSFKE   | QPELDSFKE   | 0.000002    | 87          | 2.00E-06     | 87          | TRUE         | TRUE              |
| 1     | QPQFQGRD   | 546   | 554  | 9              | HLA-A*02:01 | 546           | 87             | QPQFQGRD    | QPQFQGRD    | 0.000002    | 87          | 2.00E-06     | 87          | TRUE         | TRUE              |
| 1     | QSKRVDFCG  | 1018  | 1026 | 9              | HLA-A*02:01 | 1018          | 87             | QSKRVDFCG   | QSKRVDFCG   | 0.000002    | 87          | 2.00E-06     | 87          | TRUE         | TRUE              |
| 1     | QTGVADIYN  | 401   | 409  | 9              | HLA-A*02:01 | 401           | 87             | QTGVADIYN   | QTGVADIYN   | 0.000002    | 87          | 2.00E-06     | 87          | TRUE         | TRUE              |
| 1     | RACNFELCD  | 126   | 134  | 9              | HLA-A*02:01 | 126           | 87             | RACNFELCD   | RACNFELCD   | 0.000002    | 87          | 2.00E-06     | 87          | TRUE         | TRUE              |
| 1     | SDTLYLTDQ  | 49    | 57   | 9              | HLA-A*02:01 | 49            | 87             | SDTLYLTDQ   | SDTLYLTDQ   | 0.000002    | 87          | 2.00E-06     | 87          | TRUE         | TRUE              |
| 1     | SGNCDVVG   | 1105  | 1113 | 9              | HLA-A*02:01 | 1105          | 87             | SGNCDVVG    | SGNCDVVG    | 0.000002    | 87          | 2.00E-06     | 87          | TRUE         | TRUE              |
| 1     | SYECDPIG   | 645   | 653  | 9              | HLA-A*02:01 | 645           | 87             | SYECDPIG    | SYECDPIG    | 0.000002    | 87          | 2.00E-06     | 87          | TRUE         | TRUE              |
| 1     | TAGWTFGAG  | 865   | 873  | 9              | HLA-A*02:01 | 865           | 87             | TAGWTFGAG   | TAGWTFGAG   | 0.000002    | 87          | 2.00E-06     | 87          | TRUE         | TRUE              |
| 1     | TFMLKYDEN  | 261   | 269  | 9              | HLA-A*02:01 | 261           | 87             | TFMLKYDEN   | TFMLKYDEN   | 0.000002    | 87          | 2.00E-06     | 87          | TRUE         | TRUE              |
| 1     | TPGTNASSE  | 585   | 593  | 9              | HLA-A*02:01 | 585           | 87             | TPGTNASSE   | TPGTNASSE   | 0.000002    | 87          | 2.00E-06     | 87          | TRUE         | TRUE              |
| 1     | TSCCCLUG   | 1220  | 1228 | 9              | HLA-A*02:01 | 1220          | 87             | TSCCCLUG    | TSCCCLUG    | 0.000002    | 87          | 2.00E-06     | 87          | TRUE         | TRUE              |
| 1     | TVYPSQERN  | 1048  | 1056 | 9              | HLA-A*02:01 | 1048          | 87             | TVYPSQERN   | TVYPSQERN   | 0.000002    | 87          | 2.00E-06     | 87          | TRUE         | TRUE              |
| 1     | VRLDPSGFN  | 206   | 214  | 9              | HLA-A*02:01 | 206           | 87             | VRLDPSGFN   | VRLDPSGFN   | 0.000002    | 87          | 2.00E-06     | 87          | TRUE         | TRUE              |
| 1     | VYKGYQPID  | 196   | 204  | 9              | HLA-A*02:01 | 196           | 87             | VYKGYQPID   | VYKGYQPID   | 0.000002    | 87          | 2.00E-06     | 87          | TRUE         | TRUE              |
| 1     | YDENGTITD  | 266   | 274  | 9              | HLA-A*02:01 | 266           | 87             | YDENGTITD   | YDENGTITD   | 0.000002    | 87          | 2.00E-06     | 87          | TRUE         | TRUE              |
| 1     | YFKNHTSPD  | 1137  | 1145 | 9              | HLA-A*02:01 | 1137          | 87             | YFKNHTSPD   | YFKNHTSPD   | 0.000002    | 87          | 2.00E-06     | 87          | TRUE         | TRUE              |
| 1     | YGSFCTQLN  | 738   | 746  | 9              | HLA-A*02:01 | 738           | 87             | YGSFCTQLN   | YGSFCTQLN   | 0.000002    | 87          | 2.00E-06     | 87          | TRUE         | TRUE              |
| 1     | YGVSATKLN  | 367   | 375  | 9              | HLA-A*02:01 | 367           | 87             | YGVSATKLN   | YGVSATKLN   | 0.000002    | 87          | 2.00E-06     | 87          | TRUE         | TRUE              |
| 1     | ADSFVVKGD  | 384   | 392  | 9              | HLA-A*02:01 | 384           | 95             | ADSFVVKGD   | ADSFVVKGD   | 0.000001    | 95          | 1.00E-06     | 95          | TRUE         | TRUE              |
| 1     | AWRIYSTGN  | 618   | 626  | 9              | HLA-A*02:01 | 618           | 95             | AWRIYSTGN   | AWRIYSTGN   | 0.000001    | 95          | 1.00E-06     | 95          | TRUE         | TRUE              |
| 1     | CDVIGIIN   | 1108  | 1116 | 9              | HLA-A*02:01 | 1108          | 95             | CDVIGIIN    | CDVIGIIN    | 0.000001    | 95          | 1.00E-06     | 95          | TRUE         | TRUE              |
| 1     | DAGFMKQYG  | 812   | 820  | 9              | HLA-A*02:01 | 812           | 95             | DAGFMKQYG   | DAGFMKQYG   | 0.000001    | 95          | 1.00E-06     | 95          | TRUE         | TRUE              |
| 1     | DATSTGNYN  | 429   | 437  | 9              | HLA-A*02:01 | 429           | 95             | DATSTGNYN   | DATSTGNYN   | 0.000001    | 95          | 1.00E-06     | 95          | TRUE         | TRUE              |
| 1     | DDVRQIAPG  | 392   | 400  | 9              | HLA-A*02:01 | 392           | 95             | DDVRQIAPG   | DDVRQIAPG   | 0.000001    | 95          | 1.00E-06     | 95          | TRUE         | TRUE              |
| 1     | DPKTSIELD  | 564   | 572  | 9              | HLA-A*02:01 | 564           | 95             | DPKTSIELD   | DPKTSIELD   | 0.000001    | 95          | 1.00E-06     | 95          | TRUE         | TRUE              |
| 1     | DRLTGRLQ   | 976   | 984  | 9              | HLA-A*02:01 | 976           | 95             | DRLTGRLQ    | DRLTGRLQ    | 0.000001    | 95          | 1.00E-06     | 95          | TRUE         | TRUE              |
| 1     | DRLNEVAKN  | 1166  | 1174 | 9              | HLA-A*02:01 | 1166          | 95             | DRLNEVAKN   | DRLNEVAKN   | 0.000001    | 95          | 1.00E-06     | 95          | TRUE         | TRUE              |
| 1     | DSSIAYSNN  | 684   | 692  | 9              | HLA-A*02:01 | 684           | 95             | DSSIAYSNN   | DSSIAYSNN   | 0.000001    | 95          | 1.00E-06     | 95          | TRUE         | TRUE              |
| 1     | DYGFYTTTG  | 480   | 488  | 9              | HLA-A*02:01 | 480           | 95             | DYGFYTTTG   | DYGFYTTTG   | 0.000001    | 95          | 1.00E-06     | 95          | TRUE         | TRUE              |
| 1     | EFVFNKNDG  | 184   | 192  | 9              | HLA-A*02:01 | 184           | 95             | EFVFNKNDG   | EFVFNKNDG   | 0.000001    | 95          | 1.00E-06     | 95          | TRUE         | TRUE              |
| 1     | FHTINHTFG  | 69    | 77   | 9              | HLA-A*02:01 | 69            | 95             | FHTINHTFG   | FHTINHTFG   | 0.000001    | 95          | 1.00E-06     | 95          | TRUE         | TRUE              |
| 1     | GKAYFPREG  | 1067  | 1075 | 9              | HLA-A*02:01 | 1067          | 95             | GKAYFPREG   | GKAYFPREG   | 0.000001    | 95          | 1.00E-06     | 95          | TRUE         | TRUE              |
| 1     | GNPVIPIKD  | 77    | 85   | 9              | HLA-A*02:01 | 77            | 95             | GNPVIPIKD   | GNPVIPIKD   | 0.000001    | 95          | 1.00E-06     | 95          | TRUE         | TRUE              |
| 1     | GSCCKFDED  | 1233  | 1241 | 9              | HLA-A*02:01 | 1233          | 95             | GSCCKFDED   | GSCCKFDED   | 0.000001    | 95          | 1.00E-06     | 95          | TRUE         | TRUE              |
| 1     | GWVFGSTMN  | 100   | 108  | 9              | HLA-A*02:01 | 100           | 95             | GWVFGSTMN   | GWVFGSTMN   | 0.000001    | 95          | 1.00E-06     | 95          | TRUE         | TRUE              |
| 1     | KKISNCVAD  | 343   | 351  | 9              | HLA-A*02:01 | 343           | 95             | KKISNCVAD   | KKISNCVAD   | 0.000001    | 95          | 1.00E-06     | 95          | TRUE         | TRUE              |
| 1     | KNHTSPDVD  | 1139  | 1147 | 9              | HLA-A*02:01 | 1139          | 95             | KNHTSPDVD   | KNHTSPDVD   | 0.000001    | 95          | 1.00E-06     | 95          | TRUE         | TRUE              |
| 1     | KRVDFCGKG  | 1020  | 1028 | 9              | HLA-A*02:01 | 1020          | 95             | KRVDFCGKG   | KRVDFCGKG   | 0.000001    | 95          | 1.00E-06     | 95          | TRUE         | TRUE              |
| 1     | LCMTSCCS   | 1216  | 1224 | 9              | HLA-A*02:01 | 1216          | 95             | LCMTSCCS    | LCMTSCCS    | 0.000001    | 95          | 1.00E-06     | 95          | TRUE         | TRUE              |
| 1     | LDSFKEELD  | 1127  | 1135 | 9              | HLA-A*02:01 | 1127          | 95             | LDSFKEELD   | LDSFKEELD   | 0.000001    | 95          | 1.00E-06     | 95          | TRUE         | TRUE              |
| 1     | LGKLQDVVN  | 927   | 935  | 9              | HLA-A*02:01 | 927           | 95             | LGKLQDVVN   | LGKLQDVVN   | 0.000001    | 95          | 1.00E-06     | 95          | TRUE         | TRUE              |
| 1     | LNCYWLPLND | 472   | 480  | 9              | HLA-A*02:01 | 472           | 95             | LNCYWLPLND  | LNCYWLPLND  | 0.000001    | 95          | 1.00E-06     | 95          | TRUE         | TRUE              |
| 1     | LNILSLRLD  | 959   | 967  | 9              | HLA-A*02:01 | 959           | 95             | LNILSLRLD   | LNILSLRLD   | 0.000001    | 95          | 1.00E-06     | 95          | TRUE         | TRUE              |
| 1     | LRPFERDIS  | 448   | 456  | 9              | HLA-A*02:01 | 448           | 95             | LRPFERDIS   | LRPFERDIS   | 0.000001    | 95          | 1.00E-06     | 95          | TRUE         | TRUE              |
| 1     | LSGIAAEQD  | 749   | 757  | 9              | HLA-A*02:01 | 749           | 95             | LSGIAAEQD   | LSGIAAEQD   | 0.000001    | 95          | 1.00E-06     | 95          | TRUE         | TRUE              |
| 1     | MKQYGECLG  | 816   | 824  | 9              | HLA-A*02:01 | 816           | 95             | MKQYGECLG   | MKQYGECLG   | 0.000001    | 95          | 1.00E-06     | 95          | TRUE         | TRUE              |
| 1     | MIRGVYYPDE | 37    | 45   | 9              | HLA-A*02:01 | 37            | 95             | MIRGVYYPDE  | MIRGVYYPDE  | 0.000001    | 95          | 1.00E-06     | 95          | TRUE         | TRUE              |
| 1     | NCTFEYISD  | 158   | 166  | 9              | HLA-A*02:01 | 158           | 95             | NCTFEYISD   | NCTFEYISD   | 0.000001    | 95          | 1.00E-06     | 95          | TRUE         | TRUE              |
| 1     | NFRVVPDGD  | 304   | 312  | 9              | HLA-A*02:01 | 304           | 95             | NFRVVPDGD   | NFRVVPDGD   | 0.000001    | 95          | 1.00E-06     | 95          | TRUE         | TRUE              |
| 1     | NNVFQTQAG  | 626   | 634  | 9              | HLA-A*02:01 | 626           | 95             | NNVFQTQAG   | NNVFQTQAG   | 0.000001    | 95          | 1.00E-06     | 95          | TRUE         | TRUE              |
| 1     | NPVIFPDGD  | 78    | 86   | 9              | HLA-A*02:01 | 78            | 95             | NPVIFPDGD   | NPVIFPDGD   | 0.000001    | 95          | 1.00E-06     | 95          | TRUE         | TRUE              |
| 1     | PDVLDGDS   | 1144  | 1152 | 9              | HLA-A*02:01 | 1144          | 95             | PDVLDGDS    | PDVLDGDS    | 0.000001    | 95          | 1.00E-06     | 95          | TRUE         | TRUE              |
| 1     | PGQTGVADI  | 399   | 407  | 9              | HLA-A*02:01 | 399           | 95             | PGQTGVADI   | PGQTGVADI   | 0.000001    | 95          | 1.00E-06     | 95          | TRUE         | TRUE              |
| 1     | PTKRSFIED  | 794   | 802  | 9              | HLA-A*02:01 | 794           | 95             | PTKRSFIED   | PTKRSFIED   | 0.000001    | 95          | 1.00E-06     | 95          | TRUE         | TRUE              |
| 1     | PTTFMLKYD  | 259   | 267  | 9              | HLA-A*02:01 | 259           | 95             | PTTFMLKYD   | PTTFMLKYD   | 0.000001    | 95          | 1.00E-06     | 95          | TRUE         | TRUE              |
| 1     | QDVNCTDVS  | 599   | 607  | 9              | HLA-A*02:01 | 599           | 95             | QDVNCTDVS   | QDVNCTDVS   | 0.000001    | 95          | 1.00E-06     | 95          | TRUE         | TRUE              |
| 1     | QKEIDRLNE  | 1162  | 1170 | 9              | HLA-A*02:01 | 1162          | 95             | QKEIDRLNE   | QKEIDRLNE   | 0.000001    | 95          | 1.00E-06     | 95          | TRUE         | TRUE              |
| 1     | SPOITTDN   | 1093  | 1101 | 9              | HLA-A*02:01 | 1093          | 95             | SPOITTDN    | SPOITTDN    | 0.000001    | 95          | 1.00E-06     | 95          | TRUE         | TRUE              |
| 1     | TNVVIRACN  | 121   | 129  | 9              | HLA-A*02:01 | 121           | 95             | TNVVIRACN   | TNVVIRACN   | 0.000001    | 95          | 1.00E-06     | 95          | TRUE         | TRUE              |
| 1     | TPTLYFGG   | 773   | 781  | 9              | HLA-A*02:01 | 773           | 95             | TPTLYFGG    | TPTLYFGG    | 0.000001    | 95          | 1.00E-06     | 95          | TRUE         | TRUE              |
| 1     | VDCNMVYCG  | 718   | 726  | 9              | HLA-A*02:01 | 718           | 95             | VDCNMVYCG   | VDCNMVYCG   | 0.000001    | 95          | 1.00E-06     | 95          | TRUE         | TRUE              |
| 1     | VKQLSSNFG  | 945   | 953  | 9              | HLA-A*02:01 | 945           | 95             | VKQLSSNFG   | VKQLSSNFG   | 0.000001    | 95          | 1.00E-06     | 95          | TRUE         | TRUE              |
| 1     | VKSFEIDKG  | 290   | 298  | 9              | HLA-A*02:01 | 290           | 95             | VKSFEIDKG   | VKSFEIDKG   | 0.000001    | 95          | 1.00E-06     | 95          | TRUE         | TRUE              |
| 1     | YNQNAQALN  | 934   | 942  | 9              | HLA-A*02:01 | 934           | 95             | YNQNAQALN   | YNQNAQALN   | 0.000001    | 95          | 1.00E-06     | 95          | TRUE         | TRUE              |
| 1     | YDLOPELND  | 1120  | 1128 | 9              | HLA-A*02:01 | 1120          | 95             | YDLOPELND   | YDLOPELND   | 0.000001    | 95          | 1.00E-06     | 95          | TRUE         | TRUE              |
| 1     | ACNFELCDN  | 127   | 135  | 9              | HLA-A*02:01 | 127           | 100            | ACNFELCDN   | ACNFELCDN   | 0           | 100         | 0            | 100         | TRUE         | TRUE              |
| 1     | AYTMSLGAD  | 676   | 684  | 9              | HLA-A*02:01 | 676           | 100            | AYTMSLGAD   | AYTMSLGAD   | 0           | 100         | 0            | 100         | TRUE         | TRUE              |
| 1     | CKCFDEDD   | 1235  | 1243 | 9              | HLA-A*02:01 | 1235          | 100            | CKCFDEDD    | CKCFDEDD    | 0           | 100         | 0            | 100         | TRUE         | TRUE              |
| 1     | CGDSTECAN  | 725   | 733  | 9              | HLA-A*02:01 | 725           | 100            | CGDSTECAN   | CGDSTECAN   | 0           | 100         | 0            | 100         | TRUE         | TRUE              |
| 1     | CGSCCKFDE  | 1232  | 1240 | 9              | HLA-A*02:01 | 1232          | 100            | CGSCCKFDE   | CGSCCKFDE   | 0           | 100         | 0            | 100         | TRUE         | TRUE              |
| 1     | CNMVYCGDS  | 720   | 728  | 9              | HLA-A*02:01 | 720           | 100            | CNMVYCGDS   | CNMVYCGDS   | 0           | 100         | 0            | 100         | TRUE         | TRUE              |
| 1     | DCNMVYCGD  | 719   | 727  | 9              | HLA-A*02:01 | 719           | 100            | DCNMVYCGD   | DCNMVYCGD   | 0           | 100         | 0            | 100         | TRUE         | TRUE              |
| 1     | DKGIYQTSN  | 296   | 304  | 9              | HLA-A*02:01 | 296           | 100            | DKGIYQTSN   | DKGIYQTSN   | 0           | 100         | 0            | 100         | TRUE         | TRUE              |
| 1     | DSFVVKGDD  | 385   | 393  | 9              | HLA-A*02:01 | 385           | 100            | DSFVVKGDD   | DSFVVKGDD   | 0           | 100         | 0            | 100         | TRUE         | TRUE              |
| 1     | DYNYKLPPD  | 407   | 415  | 9              | HLA-A*02:01 | 407           | 100            | DYNYKLPPD   | DYNYKLPPD   | 0           | 100         | 0            | 100         | TRUE         | TRUE              |
| 1     | GKLRPFERD  | 446   | 454  | 9              | HLA-A*02:01 | 446           | 100            | GKLRPFERD   | GKLRPFERD   | 0           | 100         | 0            | 100         | TRUE         | TRUE              |
| 1     | IKNQCVNFN  | 520   | 528  | 9              | HLA-A*02:01 | 520           | 100            | IKNQCVNFN   | IKNQCVNFN   | 0           | 100         | 0            | 100         | TRUE         | TRUE              |
| 1     | LDRCTTFDD  | 16    | 24   | 9              | HLA-A*02:01 | 16            | 100            | LDRCTTFDD   | LDRCTTFDD   | 0           | 100         | 0            | 100         | TRUE         | TRUE              |
| 1     | LDVSEKSGN  | 170   | 178  | 9              | HLA-A*02:01 | 170           | 100            | LDVSEKSGN   | LDVSEKSGN   | 0           | 100         | 0            | 100         | TRUE         | TRUE              |
| 1     | LKGACSCGS  | 1226  | 1234 | 9              | HLA-A*02:01 | 1             |                |             |             |             |             |              |             |              |                   |

| seq # | peptide    | start | end  | peptide length | allele      | peptide index | median binding | netmhcan.ba | netmhcan.ba | netmhcan.ba | netmhcan.ba | legacy score | legacy rank | scores equal | percentiles equal |
|-------|------------|-------|------|----------------|-------------|---------------|----------------|-------------|-------------|-------------|-------------|--------------|-------------|--------------|-------------------|
| 1     | FIAGLIAIV  | 1202  | 1210 | 9              | HLA-A*02:01 | 1202          | 0.05           | FIAGLIAIV   | FIAGLIAIV   | 6.61        | 0.05        | 6.61         | 0.05        | TRUE         | TRUE              |
| 2     | RLQSQTYYV  | 982   | 990  | 9              | HLS-A*02:01 | 982           | 0.11           | RLQSQTYYV   | RLQSQTYYV   | 11.92       | 0.11        | 11.92        | 0.11        | TRUE         | TRUE              |
| 3     | YLPKPTFML  | 256   | 264  | 9              | HLS-A*02:01 | 256           | 0.11           | YLPKPTFML   | YLPKPTFML   | 12.25       | 0.11        | 12.25        | 0.11        | TRUE         | TRUE              |
| 4     | ILFNKVTLLA | 803   | 811  | 9              | HLS-A*02:01 | 803           | 0.12           | ILFNKVTLLA  | ILFNKVTLLA  | 12.82       | 0.12        | 12.82        | 0.12        | TRUE         | TRUE              |
| 5     | MIAAYTAAL  | 851   | 859  | 9              | HLS-A*02:01 | 851           | 0.12           | MIAAYTAAL   | MIAAYTAAL   | 13.04       | 0.12        | 13.04        | 0.12        | TRUE         | TRUE              |
| 6     | VVFHVTYV   | 1042  | 1050 | 9              | HLS-A*02:01 | 1042          | 0.16           | VVFHVTYV    | VVFHVTYV    | 17.07       | 0.16        | 17.07        | 0.16        | TRUE         | TRUE              |
| 7     | VLDNLSRL   | 958   | 966  | 9              | HLS-A*02:01 | 958           | 0.2            | VLDNLSRL    | VLDNLSRL    | 22.77       | 0.2         | 22.77        | 0.2         | TRUE         | TRUE              |
| 8     | VIADYNYKL  | 404   | 412  | 9              | HLS-A*02:01 | 404           | 0.34           | VIADYNYKL   | VIADYNYKL   | 38.03       | 0.34        | 38.03        | 0.34        | TRUE         | TRUE              |
| 9     | FSISITTEV  | 700   | 708  | 9              | HLS-A*02:01 | 700           | 0.36           | FSISITTEV   | FSISITTEV   | 39.59       | 0.36        | 39.59        | 0.36        | TRUE         | TRUE              |
| 10    | HLMSFPQAA  | 1030  | 1038 | 9              | HLS-A*02:01 | 1030          | 0.37           | HLMSFPQAA   | HLMSFPQAA   | 41.54       | 0.37        | 41.54        | 0.37        | TRUE         | TRUE              |
| 11    | LLTDDMIAA  | 846   | 854  | 9              | HLS-A*02:01 | 846           | 0.39           | LLTDDMIAA   | LLTDDMIAA   | 44.23       | 0.39        | 44.23        | 0.39        | TRUE         | TRUE              |
| 12    | RLDKVEAEV  | 965   | 973  | 9              | HLS-A*02:01 | 965           | 0.41           | RLDKVEAEV   | RLDKVEAEV   | 46.73       | 0.41        | 46.73        | 0.41        | TRUE         | TRUE              |
| 13    | VYVGYQPI   | 195   | 203  | 9              | HLS-A*02:01 | 195           | 0.45           | VYVGYQPI    | VYVGYQPI    | 54.47       | 0.45        | 54.47        | 0.45        | TRUE         | TRUE              |
| 14    | NVYADSFVV  | 381   | 389  | 9              | HLS-A*02:01 | 381           | 0.45           | NVYADSFVV   | NVYADSFVV   | 55.34       | 0.45        | 55.34        | 0.45        | TRUE         | TRUE              |
| 15    | SVIAYTMSL  | 673   | 681  | 9              | HLS-A*02:01 | 673           | 0.49           | SVIAYTMSL   | SVIAYTMSL   | 61.63       | 0.49        | 61.63        | 0.49        | TRUE         | TRUE              |
| 16    | VLNYSFFS   | 354   | 362  | 9              | HLS-A*02:01 | 354           | 0.52           | VLNYSFFS    | VLNYSFFS    | 64.98       | 0.52        | 64.98        | 0.52        | TRUE         | TRUE              |
| 17    | SITTEVMVP  | 703   | 711  | 9              | HLS-A*02:01 | 703           | 0.55           | SITTEVMVP   | SITTEVMVP   | 70.36       | 0.55        | 70.36        | 0.55        | TRUE         | TRUE              |
| 18    | KOMYKPTPL  | 768   | 776  | 9              | HLS-A*02:01 | 768           | 0.6            | KOMYKPTPL   | KOMYKPTPL   | 78.16       | 0.6         | 78.16        | 0.6         | TRUE         | TRUE              |
| 19    | FLFLTLLS   | 4     | 12   | 9              | HLS-A*02:01 | 4             | 0.65           | FLFLTLLS    | FLFLTLLS    | 85.93       | 0.65        | 85.93        | 0.65        | TRUE         | TRUE              |
| 20    | NLNESLIDL  | 1174  | 1182 | 9              | HLS-A*02:01 | 1174          | 0.67           | NLNESLIDL   | NLNESLIDL   | 89.53       | 0.67        | 89.53        | 0.67        | TRUE         | TRUE              |
| 21    | GLTVLPPL   | 839   | 847  | 9              | HLS-A*02:01 | 839           | 0.75           | GLTVLPPL    | GLTVLPPL    | 100.5       | 0.75        | 100.5        | 0.75        | TRUE         | TRUE              |
| 22    | ALVSGTATA  | 858   | 866  | 9              | HLS-A*02:01 | 858           | 0.78           | ALVSGTATA   | ALVSGTATA   | 104.99      | 0.78        | 104.99       | 0.78        | TRUE         | TRUE              |
| 23    | VLSELLNA   | 498   | 506  | 9              | HLS-A*02:01 | 498           | 0.93           | VLSELLNA    | VLSELLNA    | 133.32      | 0.93        | 133.32       | 0.93        | TRUE         | TRUE              |
| 24    | ATAGWTFGA  | 864   | 872  | 9              | HLS-A*02:01 | 864           | 1.3            | ATAGWTFGA   | ATAGWTFGA   | 184.5       | 1.3         | 184.5        | 1.3         | TRUE         | TRUE              |
| 25    | HIINSTNV   | 115   | 123  | 9              | HLS-A*02:01 | 115           | 1.3            | HIINSTNV    | HIINSTNV    | 187.46      | 1.3         | 187.46       | 1.3         | TRUE         | TRUE              |
| 26    | KLPDFMGFC  | 411   | 419  | 9              | HLS-A*02:01 | 411           | 1.3            | KLPDFMGFC   | KLPDFMGFC   | 196.44      | 1.3         | 196.44       | 1.3         | TRUE         | TRUE              |
| 27    | AILTAFSPA  | 233   | 241  | 9              | HLS-A*02:01 | 233           | 1.4            | AILTAFSPA   | AILTAFSPA   | 204.09      | 1.4         | 204.09       | 1.4         | TRUE         | TRUE              |
| 28    | GTSAAYFV   | 246   | 254  | 9              | HLS-A*02:01 | 246           | 1.4            | GTSAAYFV    | GTSAAYFV    | 211.55      | 1.4         | 211.55       | 1.4         | TRUE         | TRUE              |
| 29    | RLNEVAKNL  | 1167  | 1175 | 9              | HLS-A*02:01 | 1167          | 1.5            | RLNEVAKNL   | RLNEVAKNL   | 246.13      | 1.5         | 246.13       | 1.5         | TRUE         | TRUE              |
| 30    | MIFDNFNC   | 151   | 159  | 9              | HLS-A*02:01 | 151           | 1.5            | MIFDNFNC    | MIFDNFNC    | 250.37      | 1.5         | 250.37       | 1.5         | TRUE         | TRUE              |
| 31    | GLIAVMVT   | 1205  | 1213 | 9              | HLS-A*02:01 | 1205          | 1.7            | GLIAVMVT    | GLIAVMVT    | 297.22      | 1.7         | 297.22       | 1.7         | TRUE         | TRUE              |
| 32    | FVSGNCDVV  | 1103  | 1111 | 9              | HLS-A*02:01 | 1103          | 1.8            | FVSGNCDVV   | FVSGNCDVV   | 318.47      | 1.8         | 318.47       | 1.8         | TRUE         | TRUE              |
| 33    | FIFLLFTL   | 2     | 10   | 9              | HLS-A*02:01 | 2             | 1.8            | FIFLLFTL    | FIFLLFTL    | 329.3       | 1.8         | 329.3        | 1.8         | TRUE         | TRUE              |
| 34    | RVVLSFEL   | 495   | 503  | 9              | HLS-A*02:01 | 495           | 1.9            | RVVLSFEL    | RVVLSFEL    | 343.47      | 1.9         | 343.47       | 1.9         | TRUE         | TRUE              |
| 35    | ELLNAPATV  | 502   | 510  | 9              | HLS-A*02:01 | 502           | 1.9            | ELLNAPATV   | ELLNAPATV   | 351.36      | 1.9         | 351.36       | 1.9         | TRUE         | TRUE              |
| 36    | VLVENQKQI  | 897   | 905  | 9              | HLS-A*02:01 | 897           | 1.9            | VLVENQKQI   | VLVENQKQI   | 364.81      | 1.9         | 364.81       | 1.9         | TRUE         | TRUE              |
| 37    | TOAGCLIGA  | 631   | 639  | 9              | HLS-A*02:01 | 631           | 2              | TOAGCLIGA   | TOAGCLIGA   | 406.44      | 2           | 406.44       | 2           | TRUE         | TRUE              |
| 38    | FLHVTVPVS  | 1044  | 1052 | 9              | HLS-A*02:01 | 1044          | 2.1            | FLHVTVPVS   | FLHVTVPVS   | 433.31      | 2.1         | 433.31       | 2.1         | TRUE         | TRUE              |
| 39    | FMKYQGECL  | 815   | 823  | 9              | HLS-A*02:01 | 815           | 2.2            | FMKYQGECL   | FMKYQGECL   | 455.97      | 2.2         | 455.97       | 2.2         | TRUE         | TRUE              |
| 40    | FSTFKCYGV  | 361   | 369  | 9              | HLS-A*02:01 | 361           | 2.2            | FSTFKCYGV   | FSTFKCYGV   | 457.64      | 2.2         | 457.64       | 2.2         | TRUE         | TRUE              |
| 41    | TMNNKSQSV  | 106   | 114  | 9              | HLS-A*02:01 | 106           | 2.2            | TMNNKSQSV   | TMNNKSQSV   | 466.77      | 2.2         | 466.77       | 2.2         | TRUE         | TRUE              |
| 42    | IIITDNTFV  | 1096  | 1104 | 9              | HLS-A*02:01 | 1096          | 2.2            | IIITDNTFV   | IIITDNTFV   | 476.54      | 2.2         | 476.54       | 2.2         | TRUE         | TRUE              |
| 43    | ELCDNPFFA  | 131   | 139  | 9              | HLS-A*02:01 | 131           | 2.4            | ELCDNPFFA   | ELCDNPFFA   | 548.01      | 2.4         | 548.01       | 2.4         | TRUE         | TRUE              |
| 44    | GICASYHTV  | 655   | 663  | 9              | HLS-A*02:01 | 655           | 2.4            | GICASYHTV   | GICASYHTV   | 549.73      | 2.4         | 549.73       | 2.4         | TRUE         | TRUE              |
| 45    | SLTTTSTAL  | 919   | 927  | 9              | HLS-A*02:01 | 919           | 2.4            | SLTTTSTAL   | SLTTTSTAL   | 551.21      | 2.4         | 551.21       | 2.4         | TRUE         | TRUE              |
| 46    | ALNTLVKQL  | 940   | 948  | 9              | HLS-A*02:01 | 940           | 2.4            | ALNTLVKQL   | ALNTLVKQL   | 563.85      | 2.4         | 563.85       | 2.4         | TRUE         | TRUE              |
| 47    | RYSTGNVNV  | 620   | 628  | 9              | HLS-A*02:01 | 620           | 2.4            | RYSTGNVNV   | RYSTGNVNV   | 576.1       | 2.4         | 576.1        | 2.4         | TRUE         | TRUE              |
| 48    | FLPFYSNVT  | 59    | 67   | 9              | HLS-A*02:01 | 59            | 2.5            | FLPFYSNVT   | FLPFYSNVT   | 612.34      | 2.5         | 612.34       | 2.5         | TRUE         | TRUE              |
| 49    | VLTDQLFLP  | 53    | 61   | 9              | HLS-A*02:01 | 53            | 2.6            | VLTDQLFLP   | VLTDQLFLP   | 661.13      | 2.6         | 661.13       | 2.6         | TRUE         | TRUE              |
| 50    | YQTSNFRVV  | 300   | 308  | 9              | HLS-A*02:01 | 300           | 2.7            | YQTSNFRVV   | YQTSNFRVV   | 677.82      | 2.7         | 677.82       | 2.7         | TRUE         | TRUE              |
| 51    | WTFGAGAAI  | 868   | 876  | 9              | HLS-A*02:01 | 868           | 2.7            | WTFGAGAAI   | WTFGAGAAI   | 708.79      | 2.7         | 708.79       | 2.7         | TRUE         | TRUE              |
| 52    | YQDVNCTDV  | 598   | 606  | 9              | HLS-A*02:01 | 598           | 2.7            | YQDVNCTDV   | YQDVNCTDV   | 710.25      | 2.7         | 710.25       | 2.7         | TRUE         | TRUE              |
| 53    | KQLSNFNGA  | 946   | 954  | 9              | HLS-A*02:01 | 946           | 2.8            | KQLSNFNGA   | KQLSNFNGA   | 748.39      | 2.8         | 748.39       | 2.8         | TRUE         | TRUE              |
| 54    | LIAMVMVTI  | 1206  | 1214 | 9              | HLS-A*02:01 | 1206          | 2.8            | LIAMVMVTI   | LIAMVMVTI   | 769.87      | 2.8         | 769.87       | 2.8         | TRUE         | TRUE              |
| 55    | WLGFAGLI   | 1199  | 1207 | 9              | HLS-A*02:01 | 1199          | 2.9            | WLGFAGLI    | WLGFAGLI    | 807.56      | 2.9         | 807.56       | 2.9         | TRUE         | TRUE              |
| 56    | QLNRALSGI  | 744   | 752  | 9              | HLS-A*02:01 | 744           | 2.9            | QLNRALSGI   | QLNRALSGI   | 814.15      | 2.9         | 814.15       | 2.9         | TRUE         | TRUE              |
| 57    | QIWKWPPVW  | 1190  | 1198 | 9              | HLS-A*02:01 | 1190          | 2.9            | QIWKWPPVW   | QIWKWPPVW   | 822.82      | 2.9         | 822.82       | 2.9         | TRUE         | TRUE              |
| 58    | ALGKGDVW   | 926   | 934  | 9              | HLS-A*02:01 | 926           | 3              | ALGKGDVW    | ALGKGDVW    | 852.18      | 3           | 852.18       | 3           | TRUE         | TRUE              |
| 59    | LOIFAMQM   | 876   | 884  | 9              | HLS-A*02:01 | 876           | 3              | LOIFAMQM    | LOIFAMQM    | 863.81      | 3           | 863.81       | 3           | TRUE         | TRUE              |
| 60    | CTFEYSDA   | 159   | 167  | 9              | HLS-A*02:01 | 159           | 3              | CTFEYSDA    | CTFEYSDA    | 872.69      | 3           | 872.69       | 3           | TRUE         | TRUE              |
| 61    | VIGIINTV   | 1111  | 1119 | 9              | HLS-A*02:01 | 1111          | 3.1            | VIGIINTV    | VIGIINTV    | 898.53      | 3.1         | 898.53       | 3.1         | TRUE         | TRUE              |
| 62    | LLQGSFCT   | 735   | 743  | 9              | HLS-A*02:01 | 735           | 3.1            | LLQGSFCT    | LLQGSFCT    | 923.23      | 3.1         | 923.23       | 3.1         | TRUE         | TRUE              |
| 63    | QMAVRFNGI  | 883   | 891  | 9              | HLS-A*02:01 | 883           | 3.1            | QMAVRFNGI   | QMAVRFNGI   | 940.57      | 3.1         | 940.57       | 3.1         | TRUE         | TRUE              |
| 64    | ILLCMTSC   | 1214  | 1222 | 9              | HLS-A*02:01 | 1214          | 3.1            | ILLCMTSC    | ILLCMTSC    | 987.81      | 3.1         | 987.81       | 3.1         | TRUE         | TRUE              |
| 65    | VIRACNFEL  | 124   | 132  | 9              | HLS-A*02:01 | 124           | 3.3            | VIRACNFEL   | VIRACNFEL   | 1032.71     | 3.3         | 1032.71      | 3.3         | TRUE         | TRUE              |
| 66    | PLAEKCSV   | 282   | 290  | 9              | HLS-A*02:01 | 282           | 3.4            | PLAEKCSV    | PLAEKCSV    | 1068.17     | 3.4         | 1068.17      | 3.4         | TRUE         | TRUE              |
| 67    | IAIPTNFSI  | 694   | 702  | 9              | HLS-A*02:01 | 694           | 3.4            | IAIPTNFSI   | IAIPTNFSI   | 1094.71     | 3.4         | 1094.71      | 3.4         | TRUE         | TRUE              |
| 68    | QIAPGOTGV  | 396   | 404  | 9              | HLS-A*02:01 | 396           | 3.6            | QIAPGOTGV   | QIAPGOTGV   | 1188.85     | 3.6         | 1188.85      | 3.6         | TRUE         | TRUE              |
| 69    | VLAWNTRNI  | 420   | 428  | 9              | HLS-A*02:01 | 420           | 3.6            | VLAWNTRNI   | VLAWNTRNI   | 1216.08     | 3.6         | 1216.08      | 3.6         | TRUE         | TRUE              |
| 70    | IAAYTAALV  | 852   | 860  | 9              | HLS-A*02:01 | 852           | 3.6            | IAAYTAALV   | IAAYTAALV   | 1224.93     | 3.6         | 1224.93      | 3.6         | TRUE         | TRUE              |
| 71    | FOTOAGGLI  | 629   | 637  | 9              | HLS-A*02:01 | 629           | 3.7            | FOTOAGGLI   | FOTOAGGLI   | 1308.97     | 3.7         | 1308.97      | 3.7         | TRUE         | TRUE              |
| 72    | VLVDVNCT   | 596   | 604  | 9              | HLS-A*02:01 | 596           | 3.8            | VLVDVNCT    | VLVDVNCT    | 1342.97     | 3.8         | 1342.97      | 3.8         | TRUE         | TRUE              |
| 73    | CMTSCCSCL  | 1218  | 1226 | 9              | HLS-A*02:01 | 1218          | 3.8            | CMTSCCSCL   | CMTSCCSCL   | 1350.56     | 3.8         | 1350.56      | 3.8         | TRUE         | TRUE              |
| 74    | FVFNSTSWF  | 1077  | 1085 | 9              | HLS-A*02:01 | 1077          | 3.8            | FVFNSTSWF   | FVFNSTSWF   | 1352.2      | 3.8         | 1352.2       | 3.8         | TRUE         | TRUE              |
| 75    | YQPRVVVL   | 491   | 499  | 9              | HLS-A*02:01 | 491           | 3.8            | YQPRVVVL    | YQPRVVVL    | 1377.75     | 3.8         | 1377.75      | 3.8         | TRUE         | TRUE              |
| 76    | GINASVNI   | 1153  | 1161 | 9              | HLS-A*02:01 | 1153          | 3.8            | GINASVNI    | GINASVNI    | 1383.16     | 3.8         | 1383.16      | 3.8         | TRUE         | TRUE              |
| 77    | AISSVLNDI  | 954   | 962  | 9              | HLS-A*02:01 | 954           | 3.9            | AISSVLNDI   | AISSVLNDI   | 1427.57     | 3.9         | 1427.57      | 3.9         | TRUE         | TRUE              |
| 78    | AIAMVTILL  | 1208  | 1216 | 9              | HLS-A*02:01 | 1208          | 3.9            | AIAMVTILL   | AIAMVTILL   | 1428.93     | 3.9         | 1428.93      | 3.9         | TRUE         | TRUE              |
| 79    | LLFPFYSNV  | 58    | 66   | 9              | HLS-A*02:01 | 58            | 3.9            | LLFPFYSNV   | LLFPFYSNV   | 1450.41     | 3.9         | 1450.41      | 3.9         | TRUE         | TRUE              |
| 80    | LLFLTSG    | 5     | 13   | 9              | HLS-A*02:01 | 5             | 4              | LLFLTSG     | LLFLTSG     | 1492.18     | 4           | 1492.18      | 4           | TRUE         | TRUE              |
| 81    | ILPDLPKPT  | 787   | 795  | 9              | HLS-A*02:01 | 787           | 4              | ILPDLPKPT   | ILPDLPKPT   | 1503.81     | 4           | 1503.81      | 4           | TRUE         | TRUE              |
| 82    | QLSSNFAGI  | 947   | 955  | 9              | HLS-A*02:01 | 947           | 4.1            | QLSSNFAGI   | QLSSNFAGI   | 1550.44     | 4.1         | 1550.44      | 4.1         | TRUE         | TRUE              |
| 83    | GIGYQPYRV  | 488   | 496  | 9              | HLS-A*02:01 | 488           | 4.4            | GIGYQPYRV   | GIGYQPYRV   | 1759.77     | 4.4         | 1759.77      | 4.4         | TRUE         | TRUE              |
| 84    | FNATKFPVS  | 329   | 337  | 9              | HLS-A*02:01 | 329           | 4.5            | FNATKFPVS   | FNATKFPVS   | 1852.82     | 4.5         | 1852.82      | 4.5         | TRUE         | TRUE              |
| 85    | TSYECIDI   | 644   | 652  | 9              | HLS-A*02:01 | 644           | 4.6            | TSYECIDI    | TSYECIDI    | 1978.76     | 4.6         | 1978.76      | 4.6         | TRUE         | TRUE              |
| 86    | VWL        |       |      |                |             |               |                |             |             |             |             |              |             |              |                   |

| seq # | peptide   | start | end  | peptide length | allele      | peptide index | median binding | netmhcpn_ba | netmhcpn_ba | netmhcpn_ba | netmhcpn_ba | legacy score | legacy rank | scores equal | percentiles equal |
|-------|-----------|-------|------|----------------|-------------|---------------|----------------|-------------|-------------|-------------|-------------|--------------|-------------|--------------|-------------------|
| 1     | ISPCSGGVG | 573   | 581  | 9              | HLA-A*02:01 | 573           | 7.3            | ISPCSGGVG   | ISPCSGGVG   | 4352.57     | 7.3         | 4352.57      | 7.3         | TRUE         | TRUE              |
| 1     | DLCFSNVYA | 376   | 384  | 9              | HLA-A*02:01 | 376           | 7.3            | DLCFSNVYA   | DLCFSNVYA   | 4367.91     | 7.3         | 4367.91      | 7.3         | TRUE         | TRUE              |
| 1     | KMSECVLGQ | 1010  | 1018 | 9              | HLA-A*02:01 | 1010          | 7.4            | KMSECVLGQ   | KMSECVLGQ   | 4470.9      | 7.4         | 4470.9       | 7.4         | TRUE         | TRUE              |
| 1     | DMIAAYTAA | 850   | 858  | 9              | HLA-A*02:01 | 850           | 7.5            | DMIAAYTAA   | DMIAAYTAA   | 4515.92     | 7.5         | 4515.92      | 7.5         | TRUE         | TRUE              |
| 1     | KAYFPREGV | 1068  | 1076 | 9              | HLA-A*02:01 | 1068          | 7.6            | KAYFPREGV   | KAYFPREGV   | 4638.28     | 7.6         | 4638.28      | 7.6         | TRUE         | TRUE              |
| 1     | IVMVTILLC | 1209  | 1217 | 9              | HLA-A*02:01 | 1209          | 7.7            | IVMVTILLC   | IVMVTILLC   | 4737.95     | 7.7         | 4737.95      | 7.7         | TRUE         | TRUE              |
| 1     | FLVYVKGQY | 193   | 201  | 9              | HLA-A*02:01 | 193           | 7.7            | FLVYVKGQY   | FLVYVKGQY   | 4746.52     | 7.7         | 4746.52      | 7.7         | TRUE         | TRUE              |
| 1     | ELDSFKEEL | 1126  | 1134 | 9              | HLA-A*02:01 | 1126          | 7.8            | ELDSFKEEL   | ELDSFKEEL   | 4841.91     | 7.8         | 4841.91      | 7.8         | TRUE         | TRUE              |
| 1     | VVIGININT | 1110  | 1118 | 9              | HLA-A*02:01 | 1110          | 7.9            | VVIGININT   | VVIGININT   | 4928.44     | 7.9         | 4928.44      | 7.9         | TRUE         | TRUE              |
| 1     | NMYICGDS  | 721   | 729  | 9              | HLA-A*02:01 | 721           | 7.9            | NMYICGDS    | NMYICGDS    | 4931.32     | 7.9         | 4931.32      | 7.9         | TRUE         | TRUE              |
| 1     | TLVLTQDLF | 51    | 59   | 9              | HLA-A*02:01 | 51            | 8              | TLVLTQDLF   | TLVLTQDLF   | 5010.7      | 8           | 5010.7       | 8           | TRUE         | TRUE              |
| 1     | FAMQMAYRF | 880   | 888  | 9              | HLA-A*02:01 | 880           | 8              | FAMQMAYRF   | FAMQMAYRF   | 5026.34     | 8           | 5026.34      | 8           | TRUE         | TRUE              |
| 1     | ELGKYEQYI | 1184  | 1192 | 9              | HLA-A*02:01 | 1184          | 8              | ELGKYEQYI   | ELGKYEQYI   | 5036.14     | 8           | 5036.14      | 8           | TRUE         | TRUE              |
| 1     | AALQIPFAM | 874   | 882  | 9              | HLA-A*02:01 | 874           | 8.1            | AALQIPFAM   | AALQIPFAM   | 5112.62     | 8.1         | 5112.62      | 8.1         | TRUE         | TRUE              |
| 1     | AQKFNGLTV | 834   | 842  | 9              | HLA-A*02:01 | 834           | 8.3            | AQKFNGLTV   | AQKFNGLTV   | 5307.3      | 8.3         | 5307.3       | 8.3         | TRUE         | TRUE              |
| 1     | FSQILPDPL | 784   | 792  | 9              | HLA-A*02:01 | 784           | 8.3            | FSQILPDPL   | FSQILPDPL   | 5325.82     | 8.3         | 5325.82      | 8.3         | TRUE         | TRUE              |
| 1     | VAYTMSLGA | 675   | 683  | 9              | HLA-A*02:01 | 675           | 8.4            | VAYTMSLGA   | VAYTMSLGA   | 5365.38     | 8.4         | 5365.38      | 8.4         | TRUE         | TRUE              |
| 1     | MSLGADSSI | 679   | 687  | 9              | HLA-A*02:01 | 679           | 8.4            | MSLGADSSI   | MSLGADSSI   | 5403.54     | 8.4         | 5403.54      | 8.4         | TRUE         | TRUE              |
| 1     | FITORNFFS | 1085  | 1093 | 9              | HLA-A*02:01 | 1085          | 8.6            | FITORNFFS   | FITORNFFS   | 5549.72     | 8.6         | 5549.72      | 8.6         | TRUE         | TRUE              |
| 1     | VMMVTILLC | 1210  | 1218 | 9              | HLA-A*02:01 | 1210          | 8.6            | VMMVTILLC   | VMMVTILLC   | 5594.33     | 8.6         | 5594.33      | 8.6         | TRUE         | TRUE              |
| 1     | ASVHTVSL  | 658   | 666  | 9              | HLA-A*02:01 | 658           | 8.6            | ASVHTVSL    | ASVHTVSL    | 5630.58     | 8.6         | 5630.58      | 8.6         | TRUE         | TRUE              |
| 1     | STFTSTFKC | 358   | 366  | 9              | HLA-A*02:01 | 358           | 8.8            | STFTSTFKC   | STFTSTFKC   | 5766.41     | 8.8         | 5766.41      | 8.8         | TRUE         | TRUE              |
| 1     | TILLCMTS  | 1213  | 1221 | 9              | HLA-A*02:01 | 1213          | 8.8            | TILLCMTS    | TILLCMTS    | 5820.31     | 8.8         | 5820.31      | 8.8         | TRUE         | TRUE              |
| 1     | SMAKTSVDC | 712   | 720  | 9              | HLA-A*02:01 | 712           | 8.8            | SMAKTSVDC   | SMAKTSVDC   | 5868.69     | 8.8         | 5868.69      | 8.8         | TRUE         | TRUE              |
| 1     | DISGINASV | 1150  | 1158 | 9              | HLA-A*02:01 | 1150          | 8.9            | DISGINASV   | DISGINASV   | 5938.95     | 8.9         | 5938.95      | 8.9         | TRUE         | TRUE              |
| 1     | AQDWGTS   | 241   | 249  | 9              | HLA-A*02:01 | 241           | 8.9            | AQDWGTS     | AQDWGTS     | 5959.81     | 8.9         | 5959.81      | 8.9         | TRUE         | TRUE              |
| 1     | KPLGINIT  | 221   | 229  | 9              | HLA-A*02:01 | 221           | 9              | KPLGINIT    | KPLGINIT    | 5997.07     | 9           | 5997.07      | 9           | TRUE         | TRUE              |
| 1     | FGAGAALQI | 870   | 878  | 9              | HLA-A*02:01 | 870           | 9.1            | FGAGAALQI   | FGAGAALQI   | 6158.5      | 9.1         | 6158.5       | 9.1         | TRUE         | TRUE              |
| 1     | TALGLQDQV | 925   | 933  | 9              | HLA-A*02:01 | 925           | 9.1            | TALGLQDQV   | TALGLQDQV   | 6173.38     | 9.1         | 6173.38      | 9.1         | TRUE         | TRUE              |
| 1     | SLGADSSIA | 680   | 688  | 9              | HLA-A*02:01 | 680           | 9.2            | SLGADSSIA   | SLGADSSIA   | 6213.05     | 9.2         | 6213.05      | 9.2         | TRUE         | TRUE              |
| 1     | GAAIQPIFA | 873   | 881  | 9              | HLA-A*02:01 | 873           | 9.2            | GAAIQPIFA   | GAAIQPIFA   | 6246.55     | 9.2         | 6246.55      | 9.2         | TRUE         | TRUE              |
| 1     | GLTGTGVL  | 531   | 539  | 9              | HLA-A*02:01 | 531           | 9.2            | GLTGTGVL    | GLTGTGVL    | 6267.06     | 9.2         | 6267.06      | 9.2         | TRUE         | TRUE              |
| 1     | DVSDFTDSV | 554   | 562  | 9              | HLA-A*02:01 | 554           | 9.3            | DVSDFTDSV   | DVSDFTDSV   | 6333.11     | 9.3         | 6333.11      | 9.3         | TRUE         | TRUE              |
| 1     | NGLTVLPL  | 838   | 846  | 9              | HLA-A*02:01 | 838           | 9.4            | NGLTVLPL    | NGLTVLPL    | 6384.78     | 9.4         | 6384.78      | 9.4         | TRUE         | TRUE              |
| 1     | FMGCVLAWN | 416   | 424  | 9              | HLA-A*02:01 | 416           | 9.4            | FMGCVLAWN   | FMGCVLAWN   | 6390.24     | 9.4         | 6390.24      | 9.4         | TRUE         | TRUE              |
| 1     | IKWPVWVWL | 1192  | 1200 | 9              | HLA-A*02:01 | 1192          | 9.4            | IKWPVWVWL   | IKWPVWVWL   | 6463.74     | 9.4         | 6463.74      | 9.4         | TRUE         | TRUE              |
| 1     | VMPVSMKAT | 708   | 716  | 9              | HLA-A*02:01 | 708           | 9.5            | VMPVSMKAT   | VMPVSMKAT   | 6536.25     | 9.5         | 6536.25      | 9.5         | TRUE         | TRUE              |
| 1     | RVVPSGDV  | 306   | 314  | 9              | HLA-A*02:01 | 306           | 9.6            | RVVPSGDV    | RVVPSGDV    | 6611.64     | 9.6         | 6611.64      | 9.6         | TRUE         | TRUE              |
| 1     | PIFKPLGI  | 218   | 226  | 9              | HLA-A*02:01 | 218           | 9.6            | PIFKPLGI    | PIFKPLGI    | 6634.15     | 9.6         | 6634.15      | 9.6         | TRUE         | TRUE              |
| 1     | DLLFNKVT  | 802   | 810  | 9              | HLA-A*02:01 | 802           | 9.6            | DLLFNKVT    | DLLFNKVT    | 6653.19     | 9.6         | 6653.19      | 9.6         | TRUE         | TRUE              |
| 1     | AGLIAVMV  | 1204  | 1212 | 9              | HLA-A*02:01 | 1204          | 9.7            | AGLIAVMV    | AGLIAVMV    | 6691.09     | 9.7         | 6691.09      | 9.7         | TRUE         | TRUE              |
| 1     | PALNCYWPL | 470   | 478  | 9              | HLA-A*02:01 | 470           | 9.8            | PALNCYWPL   | PALNCYWPL   | 6821.95     | 9.8         | 6821.95      | 9.8         | TRUE         | TRUE              |
| 1     | YFPREGVVF | 1070  | 1078 | 9              | HLA-A*02:01 | 1070          | 9.9            | YFPREGVVF   | YFPREGVVF   | 6891.24     | 9.9         | 6891.24      | 9.9         | TRUE         | TRUE              |
| 1     | KLNDLCSN  | 373   | 381  | 9              | HLA-A*02:01 | 373           | 9.9            | KLNDLCSN    | KLNDLCSN    | 6928.92     | 9.9         | 6928.92      | 9.9         | TRUE         | TRUE              |
| 1     | FKDGIYFAA | 83    | 91   | 9              | HLA-A*02:01 | 83            | 10             | FKDGIYFAA   | FKDGIYFAA   | 7024.86     | 10          | 7024.86      | 10          | TRUE         | TRUE              |
| 1     | AAPHGVVFL | 1037  | 1045 | 9              | HLA-A*02:01 | 1037          | 10             | AAPHGVVFL   | AAPHGVVFL   | 7046.79     | 10          | 7046.79      | 10          | TRUE         | TRUE              |
| 1     | VYVWLGIAG | 1197  | 1205 | 9              | HLA-A*02:01 | 1197          | 11             | VYVWLGIAG   | VYVWLGIAG   | 7168.44     | 11          | 7168.44      | 11          | TRUE         | TRUE              |
| 1     | LLNAPATVC | 503   | 511  | 9              | HLA-A*02:01 | 503           | 11             | LLNAPATVC   | LLNAPATVC   | 7191.13     | 11          | 7191.13      | 11          | TRUE         | TRUE              |
| 1     | LLCMTSCC  | 1215  | 1223 | 9              | HLA-A*02:01 | 1215          | 12             | LLCMTSCC    | LLCMTSCC    | 7284.95     | 12          | 7284.95      | 12          | TRUE         | TRUE              |
| 1     | AFNCTFEYI | 156   | 164  | 9              | HLA-A*02:01 | 156           | 12             | AFNCTFEYI   | AFNCTFEYI   | 7296.23     | 12          | 7296.23      | 12          | TRUE         | TRUE              |
| 1     | MVTILCCM  | 1211  | 1219 | 9              | HLA-A*02:01 | 1211          | 12             | MVTILCCM    | MVTILCCM    | 7318.68     | 12          | 7318.68      | 12          | TRUE         | TRUE              |
| 1     | DLPSGFNTL | 208   | 216  | 9              | HLA-A*02:01 | 208           | 12             | DLPSGFNTL   | DLPSGFNTL   | 7352.1      | 12          | 7352.1       | 12          | TRUE         | TRUE              |
| 1     | YFVGYLKPT | 252   | 260  | 9              | HLA-A*02:01 | 252           | 12             | YFVGYLKPT   | YFVGYLKPT   | 7371.85     | 12          | 7371.85      | 12          | TRUE         | TRUE              |
| 1     | QQLIRAAEI | 992   | 1000 | 9              | HLA-A*02:01 | 992           | 12             | QQLIRAAEI   | QQLIRAAEI   | 7573.49     | 12          | 7573.49      | 12          | TRUE         | TRUE              |
| 1     | NITNFRAIL | 227   | 235  | 9              | HLA-A*02:01 | 227           | 12             | NITNFRAIL   | NITNFRAIL   | 7631.89     | 12          | 7631.89      | 12          | TRUE         | TRUE              |
| 1     | FGGFNFSQI | 779   | 787  | 9              | HLA-A*02:01 | 779           | 12             | FGGFNFSQI   | FGGFNFSQI   | 7726.02     | 12          | 7726.02      | 12          | TRUE         | TRUE              |
| 1     | MFIFLFLT  | 9     | 17   | 9              | HLA-A*02:01 | 9             | 12             | MFIFLFLT    | MFIFLFLT    | 7839.28     | 12          | 7839.28      | 12          | TRUE         | TRUE              |
| 1     | DILSRLDKV | 961   | 969  | 9              | HLA-A*02:01 | 961           | 12             | DILSRLDKV   | DILSRLDKV   | 7976.17     | 12          | 7976.17      | 12          | TRUE         | TRUE              |
| 1     | FFSPQIIT  | 1091  | 1099 | 9              | HLA-A*02:01 | 1091          | 12             | FFSPQIIT    | FFSPQIIT    | 8000.2      | 12          | 8000.2       | 12          | TRUE         | TRUE              |
| 1     | STECANLL  | 728   | 736  | 9              | HLA-A*02:01 | 728           | 12             | STECANLL    | STECANLL    | 8119.32     | 12          | 8119.32      | 12          | TRUE         | TRUE              |
| 1     | SVODNMVIC | 717   | 725  | 9              | HLA-A*02:01 | 717           | 12             | SVODNMVIC   | SVODNMVIC   | 8134.97     | 12          | 8134.97      | 12          | TRUE         | TRUE              |
| 1     | RUTGRLOS  | 977   | 985  | 9              | HLA-A*02:01 | 977           | 12             | RUTGRLOS    | RUTGRLOS    | 8148.54     | 12          | 8148.54      | 12          | TRUE         | TRUE              |
| 1     | IAIWMVTIL | 1207  | 1215 | 9              | HLA-A*02:01 | 1207          | 12             | IAIWMVTIL   | IAIWMVTIL   | 8216.62     | 12          | 8216.62      | 12          | TRUE         | TRUE              |
| 1     | SQKSIVAYT | 670   | 678  | 9              | HLA-A*02:01 | 670           | 13             | SQKSIVAYT   | SQKSIVAYT   | 8384.2      | 13          | 8384.2       | 13          | TRUE         | TRUE              |
| 1     | AGWTFGAGA | 866   | 874  | 9              | HLA-A*02:01 | 866           | 13             | AGWTFGAGA   | AGWTFGAGA   | 8494.04     | 13          | 8494.04      | 13          | TRUE         | TRUE              |
| 1     | SGFNTLKPI | 211   | 219  | 9              | HLA-A*02:01 | 211           | 13             | SGFNTLKPI   | SGFNTLKPI   | 8610.63     | 13          | 8610.63      | 13          | TRUE         | TRUE              |
| 1     | VYDQIPEL  | 1119  | 1127 | 9              | HLA-A*02:01 | 1119          | 13             | VYDQIPEL    | VYDQIPEL    | 8641.52     | 13          | 8641.52      | 13          | TRUE         | TRUE              |
| 1     | NAQALNTLV | 937   | 945  | 9              | HLA-A*02:01 | 937           | 13             | NAQALNTLV   | NAQALNTLV   | 8675.62     | 13          | 8675.62      | 13          | TRUE         | TRUE              |
| 1     | GINITNFR  | 225   | 233  | 9              | HLA-A*02:01 | 225           | 13             | GINITNFR    | GINITNFR    | 8781.02     | 13          | 8781.02      | 13          | TRUE         | TRUE              |
| 1     | FAATEKSNV | 89    | 97   | 9              | HLA-A*02:01 | 89            | 13             | FAATEKSNV   | FAATEKSNV   | 8805.75     | 13          | 8805.75      | 13          | TRUE         | TRUE              |
| 1     | AQVKQMYKT | 765   | 773  | 9              | HLA-A*02:01 | 765           | 13             | AQVKQMYKT   | AQVKQMYKT   | 8848.54     | 13          | 8848.54      | 13          | TRUE         | TRUE              |
| 1     | ILTAFSPAQ | 234   | 242  | 9              | HLA-A*02:01 | 234           | 13             | ILTAFSPAQ   | ILTAFSPAQ   | 8922.57     | 13          | 8922.57      | 13          | TRUE         | TRUE              |
| 1     | KLRFPERDI | 447   | 455  | 9              | HLA-A*02:01 | 447           | 13             | KLRFPERDI   | KLRFPERDI   | 9199.21     | 13          | 9199.21      | 13          | TRUE         | TRUE              |
| 1     | CASYHTVSL | 657   | 665  | 9              | HLA-A*02:01 | 657           | 13             | CASYHTVSL   | CASYHTVSL   | 9279.58     | 13          | 9279.58      | 13          | TRUE         | TRUE              |
| 1     | DIWGTSA   | 243   | 251  | 9              | HLA-A*02:01 | 243           | 13             | DIWGTSA     | DIWGTSA     | 9319.12     | 13          | 9319.12      | 13          | TRUE         | TRUE              |
| 1     | LTQDLFLP  | 54    | 62   | 9              | HLA-A*02:01 | 54            | 14             | LTQDLFLP    | LTQDLFLP    | 9745.21     | 14          | 9745.21      | 14          | TRUE         | TRUE              |
| 1     | ALSGIAAEQ | 748   | 756  | 9              | HLA-A*02:01 | 748           | 14             | ALSGIAAEQ   | ALSGIAAEQ   | 9757.55     | 14          | 9757.55      | 14          | TRUE         | TRUE              |
| 1     | KNKDGFLV  | 188   | 196  | 9              | HLA-A*02:01 | 188           | 14             | KNKDGFLV    | KNKDGFLV    | 9764.1      | 14          | 9764.1       | 14          | TRUE         | TRUE              |
| 1     | FPOAAPHGV | 1034  | 1042 | 9              | HLA-A*02:01 | 1034          | 14             | FPOAAPHGV   | FPOAAPHGV   | 9786.84     | 14          | 9786.84      | 14          | TRUE         | TRUE              |
| 1     | VTILCCMT  | 1212  | 1220 | 9              | HLA-A*02:01 | 1212          | 14             | VTILCCMT    | VTILCCMT    | 9874.17     | 14          | 9874.17      | 14          | TRUE         | TRUE              |
| 1     | RAAEIRASA | 996   | 1004 | 9              | HLA-A*02:01 | 996           | 14             | RAAEIRASA   | RAAEIRASA   | 10163.25    | 14          | 10163.25     | 14          | TRUE         | TRUE              |
| 1     | SISITTEVM | 701   | 709  | 9              | HLA-A*02:01 | 701           | 14             | SISITTEVM   | SISITTEVM   | 10259.37    | 14          | 10259.37     | 14          | TRUE         | TRUE              |
| 1     | KSFEIDKGI | 291   | 299  | 9              | HLA-A*02:01 | 291           | 14             | KSFEIDKGI   | KSFEIDKGI   | 10269.7     | 14          | 10269.7      | 14          | TRUE         | TRUE              |
| 1     | CVLGQSKRV | 1014  | 1022 | 9              | HLA-A*02:01 | 1014          | 14             | CVLGQSKRV   | CVLGQSKRV   | 10377.49    | 14          | 10377.49     | 14          | TRUE         | TRUE              |
| 1     | SMRGVYVYP | 36    | 44   | 9              | HLA-A*02:01 | 36            | 15             | SMRGVYVYP   | SMRGVYVYP   | 10476.88    | 15          | 10476.88     | 15          | TRUE         |                   |

| seq # | peptide     | start | end  | peptide length | allele      | peptide index | median binding | netmhcan_ba | netmhcan_ba | netmhcan_ba | netmhcan_ba | legacy score | legacy rank | scores equal | percentiles equal |
|-------|-------------|-------|------|----------------|-------------|---------------|----------------|-------------|-------------|-------------|-------------|--------------|-------------|--------------|-------------------|
| 1     | ATKPSVYA    | 331   | 339  | 9              | HLA-A*02:01 | 331           | 17             | ATKPSVYA    | ATKPSVYA    | 12653.9     | 17          | 12653.9      | 17          | TRUE         | TRUE              |
| 1     | RNFTTAPAI   | 1055  | 1063 | 9              | HLA-A*02:01 | 1055          | 17             | RNFTTAPAI   | RNFTTAPAI   | 12663.49    | 17          | 12663.49     | 17          | TRUE         | TRUE              |
| 1     | IFRSDTLYL   | 46    | 54   | 9              | HLA-A*02:01 | 46            | 17             | IFRSDTLYL   | IFRSDTLYL   | 12720.89    | 17          | 12720.89     | 17          | TRUE         | TRUE              |
| 1     | QIQESLTTT   | 915   | 923  | 9              | HLA-A*02:01 | 915           | 17             | QIQESLTTT   | QIQESLTTT   | 12731.49    | 17          | 12731.49     | 17          | TRUE         | TRUE              |
| 1     | VVRGWVFGS   | 97    | 107  | 9              | HLA-A*02:01 | 97            | 17             | VVRGWVFGS   | VVRGWVFGS   | 12756.03    | 17          | 12756.03     | 17          | TRUE         | TRUE              |
| 1     | RGWVFGSTM   | 99    | 105  | 9              | HLA-A*02:01 | 99            | 17             | RGWVFGSTM   | RGWVFGSTM   | 12857.05    | 17          | 12857.05     | 17          | TRUE         | TRUE              |
| 1     | CPGEVFNA    | 323   | 331  | 9              | HLA-A*02:01 | 323           | 17             | CPGEVFNA    | CPGEVFNA    | 12872.5     | 17          | 12872.5      | 17          | TRUE         | TRUE              |
| 1     | VVNQNAQAL   | 933   | 941  | 9              | HLA-A*02:01 | 933           | 17             | VVNQNAQAL   | VVNQNAQAL   | 12960.82    | 17          | 12960.82     | 17          | TRUE         | TRUE              |
| 1     | LOSLOTYVT   | 983   | 991  | 9              | HLA-A*02:01 | 983           | 17             | LOSLOTYVT   | LOSLOTYVT   | 12961.24    | 17          | 12961.24     | 17          | TRUE         | TRUE              |
| 1     | TLADAGFMK   | 809   | 817  | 9              | HLA-A*02:01 | 809           | 17             | TLADAGFMK   | TLADAGFMK   | 13045.23    | 17          | 13045.23     | 17          | TRUE         | TRUE              |
| 1     | FVGYLKPTT   | 253   | 261  | 9              | HLA-A*02:01 | 253           | 17             | FVGYLKPTT   | FVGYLKPTT   | 13058.23    | 17          | 13058.23     | 17          | TRUE         | TRUE              |
| 1     | FLTLTSGSD   | 7     | 15   | 9              | HLA-A*02:01 | 7             | 17             | FLTLTSGSD   | FLTLTSGSD   | 13069.54    | 17          | 13069.54     | 17          | TRUE         | TRUE              |
| 1     | NVFQTQAGC   | 627   | 635  | 9              | HLA-A*02:01 | 627           | 17             | NVFQTQAGC   | NVFQTQAGC   | 13177.73    | 17          | 13177.73     | 17          | TRUE         | TRUE              |
| 1     | SPELLNAPA   | 500   | 508  | 9              | HLA-A*02:01 | 500           | 17             | SPELLNAPA   | SPELLNAPA   | 13340.56    | 17          | 13340.56     | 17          | TRUE         | TRUE              |
| 1     | SVIINNST    | 113   | 121  | 9              | HLA-A*02:01 | 113           | 17             | SVIINNST    | SVIINNST    | 13397.26    | 17          | 13397.26     | 17          | TRUE         | TRUE              |
| 1     | GVSVITPGT   | 580   | 588  | 9              | HLA-A*02:01 | 580           | 18             | GVSVITPGT   | GVSVITPGT   | 13487.87    | 18          | 13487.87     | 18          | TRUE         | TRUE              |
| 1     | MLKYDENGT   | 263   | 271  | 9              | HLA-A*02:01 | 263           | 18             | MLKYDENGT   | MLKYDENGT   | 13533.04    | 18          | 13533.04     | 18          | TRUE         | TRUE              |
| 1     | TMLCPFGEV   | 320   | 328  | 9              | HLA-A*02:01 | 320           | 18             | TMLCPFGEV   | TMLCPFGEV   | 13588.94    | 18          | 13588.94     | 18          | TRUE         | TRUE              |
| 1     | GIGVTONVL   | 890   | 898  | 9              | HLA-A*02:01 | 890           | 18             | GIGVTONVL   | GIGVTONVL   | 13613.52    | 18          | 13613.52     | 18          | TRUE         | TRUE              |
| 1     | IPTFNFSI    | 696   | 704  | 9              | HLA-A*02:01 | 696           | 18             | IPTFNFSI    | IPTFNFSI    | 13726.82    | 18          | 13726.82     | 18          | TRUE         | TRUE              |
| 1     | SNVTGFHTI   | 64    | 72   | 9              | HLA-A*02:01 | 64            | 18             | SNVTGFHTI   | SNVTGFHTI   | 13922.32    | 18          | 13922.32     | 18          | TRUE         | TRUE              |
| 1     | YHLMSPFOA   | 1029  | 1037 | 9              | HLA-A*02:01 | 1029          | 18             | YHLMSPFOA   | YHLMSPFOA   | 14309       | 18          | 14309        | 18          | TRUE         | TRUE              |
| 1     | SNVYADSFV   | 380   | 388  | 9              | HLA-A*02:01 | 380           | 18             | SNVYADSFV   | SNVYADSFV   | 14349.94    | 18          | 14349.94     | 18          | TRUE         | TRUE              |
| 1     | FIEDLFNKK   | 799   | 807  | 9              | HLA-A*02:01 | 799           | 18             | FIEDLFNKK   | FIEDLFNKK   | 14390.52    | 18          | 14390.52     | 18          | TRUE         | TRUE              |
| 1     | LTODMIAAY   | 847   | 855  | 9              | HLA-A*02:01 | 847           | 18             | LTODMIAAY   | LTODMIAAY   | 14401.42    | 18          | 14401.42     | 18          | TRUE         | TRUE              |
| 1     | FNLGLTGTG   | 529   | 537  | 9              | HLA-A*02:01 | 529           | 18             | FNLGLTGTG   | FNLGLTGTG   | 14440.89    | 18          | 14440.89     | 18          | TRUE         | TRUE              |
| 1     | VOIDRLITG   | 973   | 981  | 9              | HLA-A*02:01 | 973           | 19             | VOIDRLITG   | VOIDRLITG   | 14482.99    | 19          | 14482.99     | 19          | TRUE         | TRUE              |
| 1     | FCGKGHYLM   | 1024  | 1032 | 9              | HLA-A*02:01 | 1024          | 19             | FCGKGHYLM   | FCGKGHYLM   | 14521.59    | 19          | 14521.59     | 19          | TRUE         | TRUE              |
| 1     | IYQTSNFRV   | 299   | 307  | 9              | HLA-A*02:01 | 299           | 19             | IYQTSNFRV   | IYQTSNFRV   | 14566.91    | 19          | 14566.91     | 19          | TRUE         | TRUE              |
| 1     | YTMISLGADS  | 677   | 685  | 9              | HLA-A*02:01 | 677           | 19             | YTMISLGADS  | YTMISLGADS  | 14585.67    | 19          | 14585.67     | 19          | TRUE         | TRUE              |
| 1     | STGNNVFQT   | 623   | 631  | 9              | HLA-A*02:01 | 623           | 19             | STGNNVFQT   | STGNNVFQT   | 14764.93    | 19          | 14764.93     | 19          | TRUE         | TRUE              |
| 1     | IFLLFLTTL   | 3     | 11   | 9              | HLA-A*02:01 | 3             | 19             | IFLLFLTTL   | IFLLFLTTL   | 14858.05    | 19          | 14858.05     | 19          | TRUE         | TRUE              |
| 1     | RAILTAASP   | 232   | 240  | 9              | HLA-A*02:01 | 232           | 19             | RAILTAASP   | RAILTAASP   | 14898.29    | 19          | 14898.29     | 19          | TRUE         | TRUE              |
| 1     | AATKMSECV   | 1007  | 1015 | 9              | HLA-A*02:01 | 1007          | 19             | AATKMSECV   | AATKMSECV   | 14977.17    | 19          | 14977.17     | 19          | TRUE         | TRUE              |
| 1     | RASANLAAT   | 1001  | 1009 | 9              | HLA-A*02:01 | 1001          | 19             | RASANLAAT   | RASANLAAT   | 14997.27    | 19          | 14997.27     | 19          | TRUE         | TRUE              |
| 1     | FVKKNKDG    | 185   | 193  | 9              | HLA-A*02:01 | 185           | 19             | FVKKNKDG    | FVKKNKDG    | 15168.62    | 19          | 15168.62     | 19          | TRUE         | TRUE              |
| 1     | CLIGAEHVD   | 635   | 643  | 9              | HLA-A*02:01 | 635           | 19             | CLIGAEHVD   | CLIGAEHVD   | 15200.16    | 19          | 15200.16     | 19          | TRUE         | TRUE              |
| 1     | FKPLGINI    | 220   | 228  | 9              | HLA-A*02:01 | 220           | 19             | FKPLGINI    | FKPLGINI    | 15292.38    | 19          | 15292.38     | 19          | TRUE         | TRUE              |
| 1     | SLQTYVTQQ   | 985   | 993  | 9              | HLA-A*02:01 | 985           | 19             | SLQTYVTQQ   | SLQTYVTQQ   | 15293.87    | 19          | 15293.87     | 19          | TRUE         | TRUE              |
| 1     | EVAVLYQDV   | 593   | 601  | 9              | HLA-A*02:01 | 593           | 20             | EVAVLYQDV   | EVAVLYQDV   | 15593.63    | 20          | 15593.63     | 20          | TRUE         | TRUE              |
| 1     | NIQKEIDRL   | 1160  | 1168 | 9              | HLA-A*02:01 | 1160          | 20             | NIQKEIDRL   | NIQKEIDRL   | 15667.71    | 20          | 15667.71     | 20          | TRUE         | TRUE              |
| 1     | ITTEVMPVS   | 704   | 712  | 9              | HLA-A*02:01 | 704           | 20             | ITTEVMPVS   | ITTEVMPVS   | 15688.92    | 20          | 15688.92     | 20          | TRUE         | TRUE              |
| 1     | RSFIEDLLF   | 797   | 805  | 9              | HLA-A*02:01 | 797           | 20             | RSFIEDLLF   | RSFIEDLLF   | 15705.05    | 20          | 15705.05     | 20          | TRUE         | TRUE              |
| 1     | IAYSNNNTIA  | 687   | 695  | 9              | HLA-A*02:01 | 687           | 20             | IAYSNNNTIA  | IAYSNNNTIA  | 15706.06    | 20          | 15706.06     | 20          | TRUE         | TRUE              |
| 1     | SNCVADYSV   | 346   | 354  | 9              | HLA-A*02:01 | 346           | 20             | SNCVADYSV   | SNCVADYSV   | 15770.94    | 20          | 15770.94     | 20          | TRUE         | TRUE              |
| 1     | ALNCYWPLN   | 471   | 479  | 9              | HLA-A*02:01 | 471           | 20             | ALNCYWPLN   | ALNCYWPLN   | 15779.99    | 20          | 15779.99     | 20          | TRUE         | TRUE              |
| 1     | LTVLPLLT    | 840   | 848  | 9              | HLA-A*02:01 | 840           | 20             | LTVLPLLT    | LTVLPLLT    | 15930.1     | 20          | 15930.1      | 20          | TRUE         | TRUE              |
| 1     | KSNVVRGWV   | 94    | 102  | 9              | HLA-A*02:01 | 94            | 20             | KSNVVRGWV   | KSNVVRGWV   | 16084.76    | 20          | 16084.76     | 20          | TRUE         | TRUE              |
| 1     | MTSCCCLCK   | 1219  | 1227 | 9              | HLA-A*02:01 | 1219          | 20             | MTSCCCLCK   | MTSCCCLCK   | 16147.01    | 20          | 16147.01     | 20          | TRUE         | TRUE              |
| 1     | EQDRNTRV    | 755   | 763  | 9              | HLA-A*02:01 | 755           | 20             | EQDRNTRV    | EQDRNTRV    | 16180.58    | 20          | 16180.58     | 20          | TRUE         | TRUE              |
| 1     | YSNVTGFHT   | 63    | 71   | 9              | HLA-A*02:01 | 63            | 20             | YSNVTGFHT   | YSNVTGFHT   | 16210.03    | 20          | 16210.03     | 20          | TRUE         | TRUE              |
| 1     | LQVGSFCTQ   | 736   | 744  | 9              | HLA-A*02:01 | 736           | 20             | LQVGSFCTQ   | LQVGSFCTQ   | 16229.86    | 20          | 16229.86     | 20          | TRUE         | TRUE              |
| 1     | FRSDTLYLT   | 47    | 55   | 9              | HLA-A*02:01 | 47            | 20             | FRSDTLYLT   | FRSDTLYLT   | 16266.42    | 20          | 16266.42     | 20          | TRUE         | TRUE              |
| 1     | IAGIAIVM    | 1203  | 1211 | 9              | HLA-A*02:01 | 1203          | 20             | IAGIAIVM    | IAGIAIVM    | 16289.49    | 20          | 16289.49     | 20          | TRUE         | TRUE              |
| 1     | STAIHADQL   | 607   | 615  | 9              | HLA-A*02:01 | 607           | 20             | STAIHADQL   | STAIHADQL   | 16314.55    | 20          | 16314.55     | 20          | TRUE         | TRUE              |
| 1     | LGFIAGLIA   | 1200  | 1208 | 9              | HLA-A*02:01 | 1200          | 21             | LGFIAGLIA   | LGFIAGLIA   | 16351.12    | 21          | 16351.12     | 21          | TRUE         | TRUE              |
| 1     | FELCONPFF   | 1302  | 1310 | 9              | HLA-A*02:01 | 1302          | 21             | FELCONPFF   | FELCONPFF   | 16440.35    | 21          | 16440.35     | 21          | TRUE         | TRUE              |
| 1     | TEVSCNCDV   | 1102  | 1110 | 9              | HLA-A*02:01 | 1102          | 21             | TEVSCNCDV   | TEVSCNCDV   | 16446.37    | 21          | 16446.37     | 21          | TRUE         | TRUE              |
| 1     | HTMIFDNAP   | 149   | 157  | 9              | HLA-A*02:01 | 149           | 21             | HTMIFDNAP   | HTMIFDNAP   | 16675.21    | 21          | 16675.21     | 21          | TRUE         | TRUE              |
| 1     | GCLIGAEHV   | 634   | 642  | 9              | HLA-A*02:01 | 634           | 21             | GCLIGAEHV   | GCLIGAEHV   | 16748.27    | 21          | 16748.27     | 21          | TRUE         | TRUE              |
| 1     | KVTLADAGF   | 807   | 815  | 9              | HLA-A*02:01 | 807           | 21             | KVTLADAGF   | KVTLADAGF   | 16816.36    | 21          | 16816.36     | 21          | TRUE         | TRUE              |
| 1     | LTITSGSDL   | 8     | 16   | 9              | HLA-A*02:01 | 8             | 21             | LTITSGSDL   | LTITSGSDL   | 16827.28    | 21          | 16827.28     | 21          | TRUE         | TRUE              |
| 1     | KLODVYVQN   | 929   | 937  | 9              | HLA-A*02:01 | 929           | 21             | KLODVYVQN   | KLODVYVQN   | 16881.08    | 21          | 16881.08     | 21          | TRUE         | TRUE              |
| 1     | YSVLYNSTF   | 352   | 360  | 9              | HLA-A*02:01 | 352           | 21             | YSVLYNSTF   | YSVLYNSTF   | 16891.49    | 21          | 16891.49     | 21          | TRUE         | TRUE              |
| 1     | HLREFVFNK   | 181   | 189  | 9              | HLA-A*02:01 | 181           | 21             | HLREFVFNK   | HLREFVFNK   | 16892.78    | 21          | 16892.78     | 21          | TRUE         | TRUE              |
| 1     | TNFRAILTA   | 229   | 237  | 9              | HLA-A*02:01 | 229           | 21             | TNFRAILTA   | TNFRAILTA   | 16920.02    | 21          | 16920.02     | 21          | TRUE         | TRUE              |
| 1     | VTQOLIRAA   | 990   | 998  | 9              | HLA-A*02:01 | 990           | 21             | VTQOLIRAA   | VTQOLIRAA   | 16959.07    | 21          | 16959.07     | 21          | TRUE         | TRUE              |
| 1     | ISGINASVV   | 1151  | 1159 | 9              | HLA-A*02:01 | 1151          | 21             | ISGINASVV   | ISGINASVV   | 17090.77    | 21          | 17090.77     | 21          | TRUE         | TRUE              |
| 1     | NLLLOYGSF   | 733   | 741  | 9              | HLA-A*02:01 | 733           | 21             | NLLLOYGSF   | NLLLOYGSF   | 17240.09    | 21          | 17240.09     | 21          | TRUE         | TRUE              |
| 1     | KCSVKSEFI   | 287   | 295  | 9              | HLA-A*02:01 | 287           | 21             | KCSVKSEFI   | KCSVKSEFI   | 17253.72    | 21          | 17253.72     | 21          | TRUE         | TRUE              |
| 1     | QMYKPTLTK   | 769   | 777  | 9              | HLA-A*02:01 | 769           | 22             | QMYKPTLTK   | QMYKPTLTK   | 17337.18    | 22          | 17337.18     | 22          | TRUE         | TRUE              |
| 1     | GVFVFNCTS   | 1075  | 1083 | 9              | HLA-A*02:01 | 1075          | 22             | GVFVFNCTS   | GVFVFNCTS   | 17358.95    | 22          | 17358.95     | 22          | TRUE         | TRUE              |
| 1     | FCTQLNRL    | 741   | 749  | 9              | HLA-A*02:01 | 741           | 22             | FCTQLNRL    | FCTQLNRL    | 17436.89    | 22          | 17436.89     | 22          | TRUE         | TRUE              |
| 1     | GATAGWTF    | 862   | 870  | 9              | HLA-A*02:01 | 862           | 22             | GATAGWTF    | GATAGWTF    | 17616.47    | 22          | 17616.47     | 22          | TRUE         | TRUE              |
| 1     | NFGAISVVL   | 951   | 959  | 9              | HLA-A*02:01 | 951           | 22             | NFGAISVVL   | NFGAISVVL   | 17717.78    | 22          | 17717.78     | 22          | TRUE         | TRUE              |
| 1     | INHFTGNPV   | 72    | 80   | 9              | HLA-A*02:01 | 72            | 22             | INHFTGNPV   | INHFTGNPV   | 17825.46    | 22          | 17825.46     | 22          | TRUE         | TRUE              |
| 1     | EIDKGIYQT   | 294   | 302  | 9              | HLA-A*02:01 | 294           | 22             | EIDKGIYQT   | EIDKGIYQT   | 17844.17    | 22          | 17844.17     | 22          | TRUE         | TRUE              |
| 1     | LSFELLNAP   | 499   | 507  | 9              | HLA-A*02:01 | 499           | 22             | LSFELLNAP   | LSFELLNAP   | 17894.64    | 22          | 17894.64     | 22          | TRUE         | TRUE              |
| 1     | IVAYTMSLG   | 674   | 682  | 9              | HLA-A*02:01 | 674           | 22             | IVAYTMSLG   | IVAYTMSLG   | 17901.61    | 22          | 17901.61     | 22          | TRUE         | TRUE              |
| 1     | SAAYFVG     | 248   | 256  | 9              | HLA-A*02:01 | 248           | 22             | SAAYFVG     | SAAYFVG     | 17931.66    | 22          | 17931.66     | 22          | TRUE         | TRUE              |
| 1     | TAALVSGTA   | 856   | 864  | 9              | HLA-A*02:01 | 856           | 22             | TAALVSGTA   | TAALVSGTA   | 17932.44    | 22          | 17932.44     | 22          | TRUE         | TRUE              |
| 1     | LTPAWRIYS   | 615   | 623  | 9              | HLA-A*02:01 | 615           | 22             | LTPAWRIYS   | LTPAWRIYS   | 18055.48    | 22          | 18055.48     | 22          | TRUE         | TRUE              |
| 1     | NCTDVSTAI   | 602   | 610  | 9              | HLA-A*02:01 | 602           | 23             | NCTDVSTAI   | NCTDVSTAI   | 18151.85    | 23          | 18151.85     | 23          | TRUE         | TRUE              |
| 1     | ICAQKFNGL   | 832   | 840  | 9              | HLA-A*02:01 | 832           | 23             | ICAQKFNGL   | ICAQKFNGL   | 18157.55    | 23          | 18157.55     | 23          | TRUE         | TRUE              |
| 1     | CLGDINARD   | 822   | 830  | 9              | HLA-A*02:01 | 822           | 23             | CLGDINARD   | CLGDINARD   | 18166.98    | 23          | 18166.98     | 23          | TRUE         | TRUE              |
| 1     | NASSEVAVL</ |       |      |                |             |               |                |             |             |             |             |              |             |              |                   |

| seq # | peptide    | start | end  | peptide length | allele      | peptide index | median binding | netmhcan_ba | netmhcan_ba | netmhcan_ba | netmhcan_ba | legacy score | legacy rank | scores equal | percentiles equal |
|-------|------------|-------|------|----------------|-------------|---------------|----------------|-------------|-------------|-------------|-------------|--------------|-------------|--------------|-------------------|
| 1     | VVLSELLN   | 497   | 505  | 9              | HLA-A*02:01 | 497           | 24             | VVLSELLN    | VVLSELLN    | 19653.27    | 24          | 19653.27     | 24          | TRUE         | TRUE              |
| 1     | WVFGSTMMN  | 101   | 109  | 9              | HLA-A*02:01 | 101           | 25             | WVFGSTMMN   | WVFGSTMMN   | 19800.54    | 25          | 19800.54     | 25          | TRUE         | TRUE              |
| 1     | MGQTQHTMI  | 144   | 152  | 9              | HLA-A*02:01 | 144           | 25             | MGQTQHTMI   | MGQTQHTMI   | 19820.27    | 25          | 19820.27     | 25          | TRUE         | TRUE              |
| 1     | LYNSTFFST  | 355   | 363  | 9              | HLA-A*02:01 | 355           | 25             | LYNSTFFST   | LYNSTFFST   | 19823.27    | 25          | 19823.27     | 25          | TRUE         | TRUE              |
| 1     | PMGQTQHTM  | 143   | 151  | 9              | HLA-A*02:01 | 143           | 25             | PMGQTQHTM   | PMGQTQHTM   | 19828.41    | 25          | 19828.41     | 25          | TRUE         | TRUE              |
| 1     | AAVFGVYK   | 250   | 258  | 9              | HLA-A*02:01 | 250           | 25             | AAVFGVYK    | AAVFGVYK    | 19856.97    | 25          | 19856.97     | 25          | TRUE         | TRUE              |
| 1     | CTTFDDVQA  | 19    | 27   | 9              | HLA-A*02:01 | 19            | 25             | CTTFDDVQA   | CTTFDDVQA   | 19867.92    | 25          | 19867.92     | 25          | TRUE         | TRUE              |
| 1     | INITNFRAI  | 226   | 234  | 9              | HLA-A*02:01 | 226           | 25             | INITNFRAI   | INITNFRAI   | 19920.01    | 25          | 19920.01     | 25          | TRUE         | TRUE              |
| 1     | VRFPNITNL  | 314   | 322  | 9              | HLA-A*02:01 | 314           | 25             | VRFPNITNL   | VRFPNITNL   | 19946.55    | 25          | 19946.55     | 25          | TRUE         | TRUE              |
| 1     | STFKCYGVS  | 362   | 370  | 9              | HLA-A*02:01 | 362           | 25             | STFKCYGVS   | STFKCYGVS   | 19956.04    | 25          | 19956.04     | 25          | TRUE         | TRUE              |
| 1     | TQDLFLPFY  | 55    | 63   | 9              | HLA-A*02:01 | 55            | 25             | TQDLFLPFY   | TQDLFLPFY   | 20073.41    | 25          | 20073.41     | 25          | TRUE         | TRUE              |
| 1     | AVLYQDVNC  | 595   | 603  | 9              | HLA-A*02:01 | 595           | 25             | AVLYQDVNC   | AVLYQDVNC   | 20122.78    | 25          | 20122.78     | 25          | TRUE         | TRUE              |
| 1     | AAVTAALVS  | 853   | 861  | 9              | HLA-A*02:01 | 853           | 25             | AAVTAALVS   | AAVTAALVS   | 20132.36    | 25          | 20132.36     | 25          | TRUE         | TRUE              |
| 1     | GIYFAATEK  | 86    | 94   | 9              | HLA-A*02:01 | 86            | 25             | GIYFAATEK   | GIYFAATEK   | 20153.5     | 25          | 20153.5      | 25          | TRUE         | TRUE              |
| 1     | ITQRNFFSP  | 1086  | 1094 | 9              | HLA-A*02:01 | 1086          | 25             | ITQRNFFSP   | ITQRNFFSP   | 20253.84    | 25          | 20253.84     | 25          | TRUE         | TRUE              |
| 1     | VSGNCDVVI  | 1104  | 1112 | 9              | HLA-A*02:01 | 1104          | 25             | VSGNCDVVI   | VSGNCDVVI   | 20277.07    | 25          | 20277.07     | 25          | TRUE         | TRUE              |
| 1     | TAIPTNFS   | 693   | 701  | 9              | HLA-A*02:01 | 693           | 25             | TAIPTNFS    | TAIPTNFS    | 20362.61    | 25          | 20362.61     | 25          | TRUE         | TRUE              |
| 1     | GTSWFITQR  | 1081  | 1089 | 9              | HLA-A*02:01 | 1081          | 25             | GTSWFITQR   | GTSWFITQR   | 20409.37    | 25          | 20409.37     | 25          | TRUE         | TRUE              |
| 1     | AEIRASANL  | 998   | 1006 | 9              | HLA-A*02:01 | 998           | 25             | AEIRASANL   | AEIRASANL   | 20428.15    | 25          | 20428.15     | 25          | TRUE         | TRUE              |
| 1     | HTVSLIRST  | 661   | 669  | 9              | HLA-A*02:01 | 661           | 25             | HTVSLIRST   | HTVSLIRST   | 20531.84    | 25          | 20531.84     | 25          | TRUE         | TRUE              |
| 1     | FDEODSEPV  | 1238  | 1246 | 9              | HLA-A*02:01 | 1238          | 26             | FDEODSEPV   | FDEODSEPV   | 20568.31    | 26          | 20568.31     | 26          | TRUE         | TRUE              |
| 1     | KTSELDIS   | 566   | 574  | 9              | HLA-A*02:01 | 566           | 26             | KTSELDIS    | KTSELDIS    | 20585.01    | 26          | 20585.01     | 26          | TRUE         | TRUE              |
| 1     | FQPFQOGR   | 545   | 553  | 9              | HLA-A*02:01 | 545           | 26             | FQPFQOGR    | FQPFQOGR    | 20650.6     | 26          | 20650.6      | 26          | TRUE         | TRUE              |
| 1     | KQYGECLGD  | 817   | 825  | 9              | HLA-A*02:01 | 817           | 26             | KQYGECLGD   | KQYGECLGD   | 20677.2     | 26          | 20677.2      | 26          | TRUE         | TRUE              |
| 1     | KRSFIEDLL  | 796   | 804  | 9              | HLA-A*02:01 | 796           | 26             | KRSFIEDLL   | KRSFIEDLL   | 20983.71    | 26          | 20983.71     | 26          | TRUE         | TRUE              |
| 1     | GOTGVADY   | 400   | 408  | 9              | HLA-A*02:01 | 400           | 27             | GOTGVADY    | GOTGVADY    | 21284.4     | 27          | 21284.4      | 27          | TRUE         | TRUE              |
| 1     | IINNTVYDP  | 1114  | 1122 | 9              | HLA-A*02:01 | 1114          | 27             | IINNTVYDP   | IINNTVYDP   | 21323.37    | 27          | 21323.37     | 27          | TRUE         | TRUE              |
| 1     | TTSTALGKL  | 922   | 930  | 9              | HLA-A*02:01 | 922           | 27             | TTSTALGKL   | TTSTALGKL   | 21339.52    | 27          | 21339.52     | 27          | TRUE         | TRUE              |
| 1     | AGICASYHT  | 654   | 662  | 9              | HLA-A*02:01 | 654           | 27             | AGICASYHT   | AGICASYHT   | 21430.68    | 27          | 21430.68     | 27          | TRUE         | TRUE              |
| 1     | NITNLCPF   | 318   | 326  | 9              | HLA-A*02:01 | 318           | 27             | NITNLCPF    | NITNLCPF    | 21638.98    | 27          | 21638.98     | 27          | TRUE         | TRUE              |
| 1     | SVLNDILSR  | 957   | 965  | 9              | HLA-A*02:01 | 957           | 27             | SVLNDILSR   | SVLNDILSR   | 21675.29    | 27          | 21675.29     | 27          | TRUE         | TRUE              |
| 1     | STSQKSIVA  | 668   | 676  | 9              | HLA-A*02:01 | 668           | 27             | STSQKSIVA   | STSQKSIVA   | 21693.14    | 27          | 21693.14     | 27          | TRUE         | TRUE              |
| 1     | RGVYVPDEI  | 38    | 46   | 9              | HLA-A*02:01 | 38            | 27             | RGVYVPDEI   | RGVYVPDEI   | 21727.19    | 27          | 21727.19     | 27          | TRUE         | TRUE              |
| 1     | DLFLPFYSN  | 57    | 65   | 9              | HLA-A*02:01 | 57            | 27             | DLFLPFYSN   | DLFLPFYSN   | 21748.84    | 27          | 21748.84     | 27          | TRUE         | TRUE              |
| 1     | AYSNNITAI  | 688   | 696  | 9              | HLA-A*02:01 | 688           | 27             | AYSNNITAI   | AYSNNITAI   | 21849.07    | 27          | 21849.07     | 27          | TRUE         | TRUE              |
| 1     | NLAATKMSE  | 1005  | 1013 | 9              | HLA-A*02:01 | 1005          | 27             | NLAATKMSE   | NLAATKMSE   | 21870.6     | 27          | 21870.6      | 27          | TRUE         | TRUE              |
| 1     | PVPIFKDGI  | 79    | 87   | 9              | HLA-A*02:01 | 79            | 27             | PVPIFKDGI   | PVPIFKDGI   | 21896.88    | 27          | 21896.88     | 27          | TRUE         | TRUE              |
| 1     | FELNAPAT   | 501   | 509  | 9              | HLA-A*02:01 | 501           | 27             | FELNAPAT    | FELNAPAT    | 21933.86    | 27          | 21933.86     | 27          | TRUE         | TRUE              |
| 1     | IANQFNKAI  | 905   | 913  | 9              | HLA-A*02:01 | 905           | 28             | IANQFNKAI   | IANQFNKAI   | 22004.46    | 28          | 22004.46     | 28          | TRUE         | TRUE              |
| 1     | NFFSPQIT   | 1090  | 1098 | 9              | HLA-A*02:01 | 1090          | 28             | NFFSPQIT    | NFFSPQIT    | 22106.61    | 28          | 22106.61     | 28          | TRUE         | TRUE              |
| 1     | IHAQDLTPA  | 610   | 618  | 9              | HLA-A*02:01 | 610           | 28             | IHAQDLTPA   | IHAQDLTPA   | 22114.02    | 28          | 22114.02     | 28          | TRUE         | TRUE              |
| 1     | LNDFGYFTT  | 478   | 486  | 9              | HLA-A*02:01 | 478           | 28             | LNDFGYFTT   | LNDFGYFTT   | 22174.4     | 28          | 22174.4      | 28          | TRUE         | TRUE              |
| 1     | TAFSPAQDI  | 236   | 244  | 9              | HLA-A*02:01 | 236           | 28             | TAFSPAQDI   | TAFSPAQDI   | 22275.15    | 28          | 22275.15     | 28          | TRUE         | TRUE              |
| 1     | AGAAQIPF   | 872   | 880  | 9              | HLA-A*02:01 | 872           | 28             | AGAAQIPF    | AGAAQIPF    | 22276.6     | 28          | 22276.6      | 28          | TRUE         | TRUE              |
| 1     | VDLGDISGI  | 1146  | 1154 | 9              | HLA-A*02:01 | 1146          | 28             | VDLGDISGI   | VDLGDISGI   | 22306.74    | 28          | 22306.74     | 28          | TRUE         | TRUE              |
| 1     | YFGGFNSQ   | 778   | 786  | 9              | HLA-A*02:01 | 778           | 28             | YFGGFNSQ    | YFGGFNSQ    | 22344.42    | 28          | 22344.42     | 28          | TRUE         | TRUE              |
| 1     | FFSTFKCYG  | 360   | 368  | 9              | HLA-A*02:01 | 360           | 28             | FFSTFKCYG   | FFSTFKCYG   | 22370.32    | 28          | 22370.32     | 28          | TRUE         | TRUE              |
| 1     | QIITDNTF   | 1095  | 1103 | 9              | HLA-A*02:01 | 1095          | 28             | QIITDNTF    | QIITDNTF    | 22429.69    | 28          | 22429.69     | 28          | TRUE         | TRUE              |
| 1     | YNSTFFSTF  | 356   | 364  | 9              | HLA-A*02:01 | 356           | 28             | YNSTFFSTF   | YNSTFFSTF   | 22481.93    | 28          | 22481.93     | 28          | TRUE         | TRUE              |
| 1     | SELDISPC   | 568   | 576  | 9              | HLA-A*02:01 | 568           | 28             | SELDISPC    | SELDISPC    | 22501.64    | 28          | 22501.64     | 28          | TRUE         | TRUE              |
| 1     | YWPLNDYGF  | 475   | 483  | 9              | HLA-A*02:01 | 475           | 28             | YWPLNDYGF   | YWPLNDYGF   | 22533.56    | 28          | 22533.56     | 28          | TRUE         | TRUE              |
| 1     | STNVVIRAC  | 120   | 128  | 9              | HLA-A*02:01 | 120           | 28             | STNVVIRAC   | STNVVIRAC   | 22565.28    | 28          | 22565.28     | 28          | TRUE         | TRUE              |
| 1     | GIINNTVYD  | 1113  | 1121 | 9              | HLA-A*02:01 | 1113          | 29             | GIINNTVYD   | GIINNTVYD   | 22718.14    | 29          | 22718.14     | 29          | TRUE         | TRUE              |
| 1     | GIYQTSNFR  | 298   | 306  | 9              | HLA-A*02:01 | 298           | 29             | GIYQTSNFR   | GIYQTSNFR   | 22837.67    | 29          | 22837.67     | 29          | TRUE         | TRUE              |
| 1     | YNYKYRYLR  | 436   | 444  | 9              | HLA-A*02:01 | 436           | 29             | YNYKYRYLR   | YNYKYRYLR   | 22862.15    | 29          | 22862.15     | 29          | TRUE         | TRUE              |
| 1     | WYVWLGFI   | 1196  | 1204 | 9              | HLA-A*02:01 | 1196          | 29             | WYVWLGFI    | WYVWLGFI    | 22875.76    | 29          | 22875.76     | 29          | TRUE         | TRUE              |
| 1     | HYDFEIRFS  | 41    | 49   | 9              | HLA-A*02:01 | 41            | 29             | HYDFEIRFS   | HYDFEIRFS   | 22878.48    | 29          | 22878.48     | 29          | TRUE         | TRUE              |
| 1     | FDNAFNCT   | 152   | 160  | 9              | HLA-A*02:01 | 152           | 29             | FDNAFNCT    | FDNAFNCT    | 23127.86    | 29          | 23127.86     | 29          | TRUE         | TRUE              |
| 1     | RALSGIAAE  | 747   | 755  | 9              | HLA-A*02:01 | 747           | 29             | RALSGIAAE   | RALSGIAAE   | 23149.65    | 29          | 23149.65     | 29          | TRUE         | TRUE              |
| 1     | TSNFRVVP   | 302   | 310  | 9              | HLA-A*02:01 | 302           | 29             | TSNFRVVP    | TSNFRVVP    | 23159.91    | 29          | 23159.91     | 29          | TRUE         | TRUE              |
| 1     | ATKMSECVL  | 1008  | 1016 | 9              | HLA-A*02:01 | 1008          | 29             | ATKMSECVL   | ATKMSECVL   | 23215.87    | 29          | 23215.87     | 29          | TRUE         | TRUE              |
| 1     | RQIAPGOTG  | 395   | 403  | 9              | HLA-A*02:01 | 395           | 30             | RQIAPGOTG   | RQIAPGOTG   | 23296.63    | 30          | 23296.63     | 30          | TRUE         | TRUE              |
| 1     | GYQPYRVVV  | 490   | 498  | 9              | HLA-A*02:01 | 490           | 30             | GYQPYRVVV   | GYQPYRVVV   | 23318.07    | 30          | 23318.07     | 30          | TRUE         | TRUE              |
| 1     | GADSSIAYS  | 682   | 690  | 9              | HLA-A*02:01 | 682           | 30             | GADSSIAYS   | GADSSIAYS   | 23349.88    | 30          | 23349.88     | 30          | TRUE         | TRUE              |
| 1     | SFGGVSVIT  | 577   | 585  | 9              | HLA-A*02:01 | 577           | 30             | SFGGVSVIT   | SFGGVSVIT   | 23369.86    | 30          | 23369.86     | 30          | TRUE         | TRUE              |
| 1     | LGDISGINA  | 1148  | 1156 | 9              | HLA-A*02:01 | 1148          | 30             | LGDISGINA   | LGDISGINA   | 23422       | 30          | 23422        | 30          | TRUE         | TRUE              |
| 1     | KGVHLMSPF  | 1027  | 1035 | 9              | HLA-A*02:01 | 1027          | 30             | KGVHLMSPF   | KGVHLMSPF   | 23458.52    | 30          | 23458.52     | 30          | TRUE         | TRUE              |
| 1     | EVMPVSMMAK | 707   | 715  | 9              | HLA-A*02:01 | 707           | 30             | EVMPVSMMAK  | EVMPVSMMAK  | 23462.06    | 30          | 23462.06     | 30          | TRUE         | TRUE              |
| 1     | LAATKMSEC  | 1006  | 1014 | 9              | HLA-A*02:01 | 1006          | 30             | LAATKMSEC   | LAATKMSEC   | 23509.08    | 30          | 23509.08     | 30          | TRUE         | TRUE              |
| 1     | HGVVFLHVT  | 1040  | 1048 | 9              | HLA-A*02:01 | 1040          | 30             | HGVVFLHVT   | HGVVFLHVT   | 23529.43    | 30          | 23529.43     | 30          | TRUE         | TRUE              |
| 1     | FTDSVRDPK  | 558   | 566  | 9              | HLA-A*02:01 | 558           | 30             | FTDSVRDPK   | FTDSVRDPK   | 23563.32    | 30          | 23563.32     | 30          | TRUE         | TRUE              |
| 1     | YSNNTIAIP  | 689   | 697  | 9              | HLA-A*02:01 | 689           | 30             | YSNNTIAIP   | YSNNTIAIP   | 23576.84    | 30          | 23576.84     | 30          | TRUE         | TRUE              |
| 1     | YEQYIKWPW  | 1188  | 1196 | 9              | HLA-A*02:01 | 1188          | 30             | YEQYIKWPW   | YEQYIKWPW   | 23592.4     | 30          | 23592.4      | 30          | TRUE         | TRUE              |
| 1     | TLVKQLSSN  | 943   | 951  | 9              | HLA-A*02:01 | 943           | 30             | TLVKQLSSN   | TLVKQLSSN   | 23614.36    | 30          | 23614.36     | 30          | TRUE         | TRUE              |
| 1     | NCVADYSVL  | 347   | 355  | 9              | HLA-A*02:01 | 347           | 30             | NCVADYSVL   | NCVADYSVL   | 23670.14    | 30          | 23670.14     | 30          | TRUE         | TRUE              |
| 1     | IINNTNVVI  | 117   | 125  | 9              | HLA-A*02:01 | 117           | 30             | IINNTNVVI   | IINNTNVVI   | 23770.49    | 30          | 23770.49     | 30          | TRUE         | TRUE              |
| 1     | TNFSISITT  | 698   | 706  | 9              | HLA-A*02:01 | 698           | 30             | TNFSISITT   | TNFSISITT   | 23794.68    | 30          | 23794.68     | 30          | TRUE         | TRUE              |
| 1     | WGTSAAYF   | 245   | 253  | 9              | HLA-A*02:01 | 245           | 30             | WGTSAAYF    | WGTSAAYF    | 23824.82    | 30          | 23824.82     | 30          | TRUE         | TRUE              |
| 1     | RNFFSPQII  | 1089  | 1097 | 9              | HLA-A*02:01 | 1089          | 30             | RNFFSPQII   | RNFFSPQII   | 23851.38    | 30          | 23851.38     | 30          | TRUE         | TRUE              |
| 1     | FAQVKQMYK  | 764   | 772  | 9              | HLA-A*02:01 | 764           | 30             | FAQVKQMYK   | FAQVKQMYK   | 23923.74    | 30          | 23923.74     | 30          | TRUE         | TRUE              |
| 1     | VVIRACNFE  | 123   | 131  | 9              | HLA-A*02:01 | 123           | 31             | VVIRACNFE   | VVIRACNFE   | 23948.35    | 31          | 23948.35     | 31          | TRUE         | TRUE              |
| 1     | GLYKPTTFM  | 255   | 263  | 9              | HLA-A*02:01 | 255           | 31             | GLYKPTTFM   | GLYKPTTFM   | 23971.42    | 31          | 23971.42     | 31          | TRUE         | TRUE              |
| 1     | KLSTDLINK  | 514   | 522  | 9              | HLA-A*02:01 | 514           | 31             | KLSTDLINK   | KLSTDLINK   | 24010.87    | 31          | 24010.87     | 31          | TRUE         | TRUE              |
| 1     | AIPTNFSIS  | 695   | 703  | 9              | HLA-A*02:01 | 695           | 31             | AIPTNFSIS   | AIPTNFSIS   | 24043.63    | 31          | 24043.63     | 31          | TRUE         | TRUE              |
| 1     | FNGTLVLP   | 837   | 845  | 9              | HLA-A*02:01 | 837           | 31             | FNGTLVLP    | FNGTLVLP    | 24          |             |              |             |              |                   |

| seq # | peptide    | start | end  | peptide length | allele      | peptide index | median binding | netmhcan_ba | netmhcan_ba | netmhcan_ba | netmhcan_ba | legacy score | legacy rank | scores equal | percentiles equal |
|-------|------------|-------|------|----------------|-------------|---------------|----------------|-------------|-------------|-------------|-------------|--------------|-------------|--------------|-------------------|
| 1     | TSAAAYFVG  | 247   | 255  | 9              | HLA-A*02:01 | 247           | 32             | TSAAAYFVG   | TSAAAYFVG   | 25115.76    | 32          | 25115.76     | 32          | TRUE         | TRUE              |
| 1     | QRNFSPQI   | 1088  | 1096 | 9              | HLA-A*02:01 | 1088          | 32             | QRNFSPQI    | QRNFSPQI    | 25128.27    | 32          | 25128.27     | 32          | TRUE         | TRUE              |
| 1     | FNGTWSWIFT | 1079  | 1087 | 9              | HLA-A*02:01 | 1079          | 32             | FNGTWSWIFT  | FNGTWSWIFT  | 25206.42    | 32          | 25206.42     | 32          | TRUE         | TRUE              |
| 1     | LFLLTSGS   | 6     | 14   | 9              | HLA-A*02:01 | 6             | 33             | LFLLTSGS    | LFLLTSGS    | 25252.27    | 33          | 25252.27     | 33          | TRUE         | TRUE              |
| 1     | LLRSTSQKS  | 665   | 673  | 9              | HLA-A*02:01 | 665           | 33             | LLRSTSQKS   | LLRSTSQKS   | 25263.75    | 33          | 25263.75     | 33          | TRUE         | TRUE              |
| 1     | KSIVAYTMS  | 672   | 680  | 9              | HLA-A*02:01 | 672           | 33             | KSIVAYTMS   | KSIVAYTMS   | 25264.03    | 33          | 25264.03     | 33          | TRUE         | TRUE              |
| 1     | IAPGQTGVI  | 397   | 405  | 9              | HLA-A*02:01 | 397           | 33             | IAPGQTGVI   | IAPGQTGVI   | 25315.19    | 33          | 25315.19     | 33          | TRUE         | TRUE              |
| 1     | KFNGLTVLPL | 836   | 844  | 9              | HLA-A*02:01 | 836           | 33             | KFNGLTVLPL  | KFNGLTVLPL  | 25367.57    | 33          | 25367.57     | 33          | TRUE         | TRUE              |
| 1     | TVLPPLITD  | 841   | 849  | 9              | HLA-A*02:01 | 841           | 33             | TVLPPLITD   | TVLPPLITD   | 25421.42    | 33          | 25421.42     | 33          | TRUE         | TRUE              |
| 1     | EILDSPCS   | 569   | 577  | 9              | HLA-A*02:01 | 569           | 33             | EILDSPCS    | EILDSPCS    | 25453.06    | 33          | 25453.06     | 33          | TRUE         | TRUE              |
| 1     | FGRDVSDFT  | 551   | 559  | 9              | HLA-A*02:01 | 551           | 33             | FGRDVSDFT   | FGRDVSDFT   | 25461.34    | 33          | 25461.34     | 33          | TRUE         | TRUE              |
| 1     | ITNLCPGGE  | 319   | 327  | 9              | HLA-A*02:01 | 319           | 33             | ITNLCPGGE   | ITNLCPGGE   | 25511.52    | 33          | 25511.52     | 33          | TRUE         | TRUE              |
| 1     | FPSVYAWER  | 334   | 342  | 9              | HLA-A*02:01 | 334           | 33             | FPSVYAWER   | FPSVYAWER   | 25557.1     | 33          | 25557.1      | 33          | TRUE         | TRUE              |
| 1     | YRYLRHGKL  | 440   | 448  | 9              | HLA-A*02:01 | 440           | 33             | YRYLRHGKL   | YRYLRHGKL   | 25596.95    | 33          | 25596.95     | 33          | TRUE         | TRUE              |
| 1     | CCMTSCSCC  | 1217  | 1225 | 9              | HLA-A*02:01 | 1217          | 33             | CCMTSCSCC   | CCMTSCSCC   | 25601.94    | 33          | 25601.94     | 33          | TRUE         | TRUE              |
| 1     | TQRNFFSPQ  | 1087  | 1095 | 9              | HLA-A*02:01 | 1087          | 33             | TQRNFFSPQ   | TQRNFFSPQ   | 25678.79    | 33          | 25678.79     | 33          | TRUE         | TRUE              |
| 1     | FNFSQILPD  | 782   | 790  | 9              | HLA-A*02:01 | 782           | 33             | FNFSQILPD   | FNFSQILPD   | 25730.8     | 33          | 25730.8      | 33          | TRUE         | TRUE              |
| 1     | FEYSDAFS   | 161   | 169  | 9              | HLA-A*02:01 | 161           | 34             | FEYSDAFS    | FEYSDAFS    | 25802.17    | 34          | 25802.17     | 34          | TRUE         | TRUE              |
| 1     | MAYRFNGIG  | 884   | 892  | 9              | HLA-A*02:01 | 884           | 34             | MAYRFNGIG   | MAYRFNGIG   | 25833.17    | 34          | 25833.17     | 34          | TRUE         | TRUE              |
| 1     | TGTGVLTPS  | 533   | 541  | 9              | HLA-A*02:01 | 533           | 34             | TGTGVLTPS   | TGTGVLTPS   | 25881.3     | 34          | 25881.3      | 34          | TRUE         | TRUE              |
| 1     | AMQMAYRFN  | 881   | 889  | 9              | HLA-A*02:01 | 881           | 34             | AMQMAYRFN   | AMQMAYRFN   | 25911.84    | 34          | 25911.84     | 34          | TRUE         | TRUE              |
| 1     | NFKHLREFV  | 178   | 186  | 9              | HLA-A*02:01 | 178           | 34             | NFKHLREFV   | NFKHLREFV   | 25991.58    | 34          | 25991.58     | 34          | TRUE         | TRUE              |
| 1     | DTLYITDOL  | 50    | 58   | 9              | HLA-A*02:01 | 50            | 34             | DTLYITDOL   | DTLYITDOL   | 26031.55    | 34          | 26031.55     | 34          | TRUE         | TRUE              |
| 1     | VSATKLNDL  | 369   | 377  | 9              | HLA-A*02:01 | 369           | 34             | VSATKLNDL   | VSATKLNDL   | 26062.26    | 34          | 26062.26     | 34          | TRUE         | TRUE              |
| 1     | TPAWRIYST  | 616   | 624  | 9              | HLA-A*02:01 | 616           | 34             | TPAWRIYST   | TPAWRIYST   | 26064.79    | 34          | 26064.79     | 34          | TRUE         | TRUE              |
| 1     | KAISQIQES  | 911   | 919  | 9              | HLA-A*02:01 | 911           | 34             | KAISQIQES   | KAISQIQES   | 26091.6     | 34          | 26091.6      | 34          | TRUE         | TRUE              |
| 1     | VFNATKFPs  | 328   | 336  | 9              | HLA-A*02:01 | 328           | 34             | VFNATKFPs   | VFNATKFPs   | 26101.48    | 34          | 26101.48     | 34          | TRUE         | TRUE              |
| 1     | GVVFHLVTV  | 1041  | 1049 | 9              | HLA-A*02:01 | 1041          | 34             | GVVFHLVTV   | GVVFHLVTV   | 26185.78    | 34          | 26185.78     | 34          | TRUE         | TRUE              |
| 1     | QLIRAAEIR  | 993   | 1001 | 9              | HLA-A*02:01 | 993           | 34             | QLIRAAEIR   | QLIRAAEIR   | 26196.56    | 34          | 26196.56     | 34          | TRUE         | TRUE              |
| 1     | AYRFNGIGV  | 885   | 893  | 9              | HLA-A*02:01 | 885           | 34             | AYRFNGIGV   | AYRFNGIGV   | 26218.11    | 34          | 26218.11     | 34          | TRUE         | TRUE              |
| 1     | FVVKGGDVR  | 387   | 395  | 9              | HLA-A*02:01 | 387           | 34             | FVVKGGDVR   | FVVKGGDVR   | 26236.83    | 34          | 26236.83     | 34          | TRUE         | TRUE              |
| 1     | ILSLDKVKE  | 962   | 970  | 9              | HLA-A*02:01 | 962           | 34             | ILSLDKVKE   | ILSLDKVKE   | 26285.71    | 34          | 26285.71     | 34          | TRUE         | TRUE              |
| 1     | POAAPGHVV  | 1035  | 1043 | 9              | HLA-A*02:01 | 1035          | 34             | POAAPGHVV   | POAAPGHVV   | 26327.26    | 34          | 26327.26     | 34          | TRUE         | TRUE              |
| 1     | AQALNTLVK  | 938   | 946  | 9              | HLA-A*02:01 | 938           | 34             | AQALNTLVK   | AQALNTLVK   | 26342.09    | 34          | 26342.09     | 34          | TRUE         | TRUE              |
| 1     | TFGNPVPIF  | 75    | 83   | 9              | HLA-A*02:01 | 75            | 34             | TFGNPVPIF   | TFGNPVPIF   | 26349.21    | 34          | 26349.21     | 34          | TRUE         | TRUE              |
| 1     | FDNAFNCTF  | 153   | 161  | 9              | HLA-A*02:01 | 153           | 35             | FDNAFNCTF   | FDNAFNCTF   | 26449.18    | 35          | 26449.18     | 35          | TRUE         | TRUE              |
| 1     | SQSIVIINN  | 111   | 119  | 9              | HLA-A*02:01 | 111           | 35             | SQSIVIINN   | SQSIVIINN   | 26467.79    | 35          | 26467.79     | 35          | TRUE         | TRUE              |
| 1     | SNNTIAIPT  | 690   | 698  | 9              | HLA-A*02:01 | 690           | 35             | SNNTIAIPT   | SNNTIAIPT   | 26470.93    | 35          | 26470.93     | 35          | TRUE         | TRUE              |
| 1     | LTITSTALG  | 920   | 928  | 9              | HLA-A*02:01 | 920           | 35             | LTITSTALG   | LTITSTALG   | 26493.56    | 35          | 26493.56     | 35          | TRUE         | TRUE              |
| 1     | VLKGVKLHY  | 1246  | 1254 | 9              | HLA-A*02:01 | 1246          | 35             | VLKGVKLHY   | VLKGVKLHY   | 26507.34    | 35          | 26507.34     | 35          | TRUE         | TRUE              |
| 1     | PLQPELDSF  | 1122  | 1130 | 9              | HLA-A*02:01 | 1122          | 35             | PLQPELDSF   | PLQPELDSF   | 26523.68    | 35          | 26523.68     | 35          | TRUE         | TRUE              |
| 1     | NSTFFSTFK  | 357   | 365  | 9              | HLA-A*02:01 | 357           | 35             | NSTFFSTFK   | NSTFFSTFK   | 26546.65    | 35          | 26546.65     | 35          | TRUE         | TRUE              |
| 1     | CSCGSCCKF  | 1230  | 1238 | 9              | HLA-A*02:01 | 1230          | 35             | CSCGSCCKF   | CSCGSCCKF   | 26635.27    | 35          | 26635.27     | 35          | TRUE         | TRUE              |
| 1     | SCCSCCLKGA | 1221  | 1229 | 9              | HLA-A*02:01 | 1221          | 35             | SCCSCCLKGA  | SCCSCCLKGA  | 26697.01    | 35          | 26697.01     | 35          | TRUE         | TRUE              |
| 1     | ITFDVQAP   | 20    | 28   | 9              | HLA-A*02:01 | 20            | 35             | ITFDVQAP    | ITFDVQAP    | 26796.28    | 35          | 26796.28     | 35          | TRUE         | TRUE              |
| 1     | HTFGNPVPI  | 74    | 82   | 9              | HLA-A*02:01 | 74            | 35             | HTFGNPVPI   | HTFGNPVPI   | 26802.66    | 35          | 26802.66     | 35          | TRUE         | TRUE              |
| 1     | ESLTTSTA   | 918   | 926  | 9              | HLA-A*02:01 | 918           | 35             | ESLTTSTA    | ESLTTSTA    | 26822.67    | 35          | 26822.67     | 35          | TRUE         | TRUE              |
| 1     | SVYAWERKK  | 336   | 344  | 9              | HLA-A*02:01 | 336           | 35             | SVYAWERKK   | SVYAWERKK   | 26836.61    | 35          | 26836.61     | 35          | TRUE         | TRUE              |
| 1     | TINHTFGNP  | 71    | 79   | 9              | HLA-A*02:01 | 71            | 35             | TINHTFGNP   | TINHTFGNP   | 26840.96    | 35          | 26840.96     | 35          | TRUE         | TRUE              |
| 1     | NVVRGWWVF  | 96    | 104  | 9              | HLA-A*02:01 | 96            | 35             | NVVRGWWVF   | NVVRGWWVF   | 26860.42    | 35          | 26860.42     | 35          | TRUE         | TRUE              |
| 1     | KCYGVSAVK  | 365   | 373  | 9              | HLA-A*02:01 | 365           | 35             | KCYGVSAVK   | KCYGVSAVK   | 26877       | 35          | 26877        | 35          | TRUE         | TRUE              |
| 1     | INARDLICA  | 826   | 834  | 9              | HLA-A*02:01 | 826           | 35             | INARDLICA   | INARDLICA   | 26900.27    | 35          | 26900.27     | 35          | TRUE         | TRUE              |
| 1     | CLKGACSCG  | 1225  | 1233 | 9              | HLA-A*02:01 | 1225          | 35             | CLKGACSCG   | CLKGACSCG   | 26905.79    | 35          | 26905.79     | 35          | TRUE         | TRUE              |
| 1     | STDLKNGQC  | 516   | 524  | 9              | HLA-A*02:01 | 516           | 35             | STDLKNGQC   | STDLKNGQC   | 26927.05    | 35          | 26927.05     | 35          | TRUE         | TRUE              |
| 1     | IPFGKGIYF  | 81    | 89   | 9              | HLA-A*02:01 | 81            | 35             | IPFGKGIYF   | IPFGKGIYF   | 26954.18    | 35          | 26954.18     | 35          | TRUE         | TRUE              |
| 1     | LQPELDSFK  | 1123  | 1131 | 9              | HLA-A*02:01 | 1123          | 36             | LQPELDSFK   | LQPELDSFK   | 27028.05    | 36          | 27028.05     | 36          | TRUE         | TRUE              |
| 1     | KRFHFLPL   | 216   | 224  | 9              | HLA-A*02:01 | 216           | 36             | KRFHFLPL    | KRFHFLPL    | 27099.8     | 36          | 27099.8      | 36          | TRUE         | TRUE              |
| 1     | AEVQDRLL   | 921   | 929  | 9              | HLA-A*02:01 | 921           | 36             | AEVQDRLL    | AEVQDRLL    | 27144.41    | 36          | 27144.41     | 36          | TRUE         | TRUE              |
| 1     | TGFHTINHT  | 67    | 75   | 9              | HLA-A*02:01 | 67            | 36             | TGFHTINHT   | TGFHTINHT   | 27148.8     | 36          | 27148.8      | 36          | TRUE         | TRUE              |
| 1     | AALVSGTAT  | 857   | 865  | 9              | HLA-A*02:01 | 857           | 36             | AALVSGTAT   | AALVSGTAT   | 27163.79    | 36          | 27163.79     | 36          | TRUE         | TRUE              |
| 1     | TQLNRALSG  | 743   | 751  | 9              | HLA-A*02:01 | 743           | 36             | TQLNRALSG   | TQLNRALSG   | 27294.3     | 36          | 27294.3      | 36          | TRUE         | TRUE              |
| 1     | TFEYSDAF   | 160   | 168  | 9              | HLA-A*02:01 | 160           | 36             | TFEYSDAF    | TFEYSDAF    | 27315.29    | 36          | 27315.29     | 36          | TRUE         | TRUE              |
| 1     | VAKNINLSE  | 1171  | 1179 | 9              | HLA-A*02:01 | 1171          | 36             | VAKNINLSE   | VAKNINLSE   | 27354.32    | 36          | 27354.32     | 36          | TRUE         | TRUE              |
| 1     | SFIEDLFLN  | 798   | 806  | 9              | HLA-A*02:01 | 798           | 36             | SFIEDLFLN   | SFIEDLFLN   | 27392.52    | 36          | 27392.52     | 36          | TRUE         | TRUE              |
| 1     | NDVGYFTTT  | 479   | 487  | 9              | HLA-A*02:01 | 479           | 36             | NDVGYFTTT   | NDVGYFTTT   | 27412.98    | 36          | 27412.98     | 36          | TRUE         | TRUE              |
| 1     | SONPLAEK   | 279   | 287  | 9              | HLA-A*02:01 | 279           | 36             | SONPLAEK    | SONPLAEK    | 27426.34    | 36          | 27426.34     | 36          | TRUE         | TRUE              |
| 1     | KNQCQVNFN  | 521   | 529  | 9              | HLA-A*02:01 | 521           | 36             | KNQCQVNFN   | KNQCQVNFN   | 27445.64    | 36          | 27445.64     | 36          | TRUE         | TRUE              |
| 1     | GTOHTMIF   | 145   | 153  | 9              | HLA-A*02:01 | 145           | 36             | GTOHTMIF    | GTOHTMIF    | 27458.99    | 36          | 27458.99     | 36          | TRUE         | TRUE              |
| 1     | GTTTDAVDC  | 270   | 278  | 9              | HLA-A*02:01 | 270           | 36             | GTTTDAVDC   | GTTTDAVDC   | 27461.96    | 36          | 27461.96     | 36          | TRUE         | TRUE              |
| 1     | EIDRLNEVA  | 1164  | 1172 | 9              | HLA-A*02:01 | 1164          | 36             | EIDRLNEVA   | EIDRLNEVA   | 27488.42    | 36          | 27488.42     | 36          | TRUE         | TRUE              |
| 1     | TQHTMIFD   | 146   | 154  | 9              | HLA-A*02:01 | 146           | 36             | TQHTMIFD    | TQHTMIFD    | 27514.92    | 36          | 27514.92     | 36          | TRUE         | TRUE              |
| 1     | ITPGTNASS  | 584   | 592  | 9              | HLA-A*02:01 | 584           | 37             | ITPGTNASS   | ITPGTNASS   | 27624.97    | 37          | 27624.97     | 37          | TRUE         | TRUE              |
| 1     | DSTECANLL  | 727   | 735  | 9              | HLA-A*02:01 | 727           | 37             | DSTECANLL   | DSTECANLL   | 27632.15    | 37          | 27632.15     | 37          | TRUE         | TRUE              |
| 1     | VITPGTNAS  | 583   | 591  | 9              | HLA-A*02:01 | 583           | 37             | VITPGTNAS   | VITPGTNAS   | 27641.42    | 37          | 27641.42     | 37          | TRUE         | TRUE              |
| 1     | YQHTSSMR   | 30    | 38   | 9              | HLA-A*02:01 | 30            | 37             | YQHTSSMR    | YQHTSSMR    | 27687.22    | 37          | 27687.22     | 37          | TRUE         | TRUE              |
| 1     | QDIWGTSAA  | 242   | 250  | 9              | HLA-A*02:01 | 242           | 37             | QDIWGTSAA   | QDIWGTSAA   | 27709.41    | 37          | 27709.41     | 37          | TRUE         | TRUE              |
| 1     | TVCGPKLST  | 509   | 517  | 9              | HLA-A*02:01 | 509           | 37             | TVCGPKLST   | TVCGPKLST   | 27714.79    | 37          | 27714.79     | 37          | TRUE         | TRUE              |
| 1     | LKKNQCVNF  | 519   | 527  | 9              | HLA-A*02:01 | 519           | 37             | LKKNQCVNF   | LKKNQCVNF   | 27758       | 37          | 27758        | 37          | TRUE         | TRUE              |
| 1     | FRAILTAFS  | 231   | 239  | 9              | HLA-A*02:01 | 231           | 37             | FRAILTAFS   | FRAILTAFS   | 27805.19    | 37          | 27805.19     | 37          | TRUE         | TRUE              |
| 1     | PFFAVSKPM  | 136   | 144  | 9              | HLA-A*02:01 | 136           | 37             | PFFAVSKPM   | PFFAVSKPM   | 27852.18    | 37          | 27852.18     | 37          | TRUE         | TRUE              |
| 1     | YRFNGIGVT  | 886   | 894  | 9              | HLA-A*02:01 | 886           | 37             | YRFNGIGVT   | YRFNGIGVT   | 27863.03    | 37          | 27863.03     | 37          | TRUE         | TRUE              |
| 1     | NQNAQALNT  | 935   | 943  | 9              | HLA-A*02:01 | 935           | 37             | NQNAQALNT   | NQNAQALNT   | 27936.68    | 37          | 27936.68     | 37          | TRUE         | TRUE              |
| 1     | IPIGAGICA  | 650   | 658  | 9              | HLA-A*02:01 | 650           | 37             | IPIGAGICA   | IPIGAGICA   | 27993.56    | 37          | 27993.56     | 37          | TRUE         | TRUE              |
| 1     | NQFNKAIQS  | 907   | 915  | 9              | HLA-A*02:01 | 907           | 37             | NQFNKAIQS   | NQFNKAIQS   | 28024.79    | 37          | 28024.79     | 37          | TRUE         | TRUE              |
| 1     | MSECVLGQS  | 1011  | 1019 | 9              | HLA-A*02:01 | 1011          | 37             | MSECVLGQS   | MSECVLGQS   | 28041.17    | 37          | 28041.17     | 37          | TRUE         |                   |

| seq # | peptide    | start | end  | peptide length | allele      | peptide index | median binding | netmhcan.ba | netmhcan.ba | netmhcan.ba | netmhcan.ba | legacy score | legacy rank | scores equal | percentiles equal |
|-------|------------|-------|------|----------------|-------------|---------------|----------------|-------------|-------------|-------------|-------------|--------------|-------------|--------------|-------------------|
| 1     | LIGAEHVDT  | 636   | 644  | 9              | HLA-A*02:01 | 636           | 40             | LIGAEHVDT   | LIGAEHVDT   | 29402.67    | 40          | 29402.67     | 40          | TRUE         | TRUE              |
| 1     | QKSIAYVTM  | 671   | 679  | 9              | HLA-A*02:01 | 671           | 40             | QKSIAYVTM   | QKSIAYVTM   | 29408.08    | 40          | 29408.08     | 40          | TRUE         | TRUE              |
| 1     | VTVYPSQER  | 1047  | 1055 | 9              | HLA-A*02:01 | 1047          | 40             | VTVYPSQER   | VTVYPSQER   | 29420.5     | 40          | 29420.5      | 40          | TRUE         | TRUE              |
| 1     | LVSGTATAG  | 859   | 867  | 9              | HLA-A*02:01 | 859           | 40             | LVSGTATAG   | LVSGTATAG   | 29442.78    | 40          | 29442.78     | 40          | TRUE         | TRUE              |
| 1     | ASANLAATK  | 1002  | 1010 | 9              | HLA-A*02:01 | 1002          | 40             | ASANLAATK   | ASANLAATK   | 29443.11    | 40          | 29443.11     | 40          | TRUE         | TRUE              |
| 1     | FNKVTLADA  | 805   | 813  | 9              | HLA-A*02:01 | 805           | 40             | FNKVTLADA   | FNKVTLADA   | 29451.39    | 40          | 29451.39     | 40          | TRUE         | TRUE              |
| 1     | YAWERKKIS  | 338   | 346  | 9              | HLA-A*02:01 | 338           | 40             | YAWERKKIS   | YAWERKKIS   | 29482.63    | 40          | 29482.63     | 40          | TRUE         | TRUE              |
| 1     | YTTTGIGYQ  | 484   | 492  | 9              | HLA-A*02:01 | 484           | 40             | YTTTGIGYQ   | YTTTGIGYQ   | 29510.72    | 40          | 29510.72     | 40          | TRUE         | TRUE              |
| 1     | TTDNTFVSG  | 1098  | 1106 | 9              | HLA-A*02:01 | 1098          | 40             | TTDNTFVSG   | TTDNTFVSG   | 29532.12    | 40          | 29532.12     | 40          | TRUE         | TRUE              |
| 1     | TQQLIRAAE  | 991   | 999  | 9              | HLA-A*02:01 | 991           | 40             | TQQLIRAAE   | TQQLIRAAE   | 29541.38    | 40          | 29541.38     | 40          | TRUE         | TRUE              |
| 1     | ISNVPFSPD  | 455   | 463  | 9              | HLA-A*02:01 | 455           | 41             | ISNVPFSPD   | ISNVPFSPD   | 29723.5     | 41          | 29723.5      | 41          | TRUE         | TRUE              |
| 1     | GVTONVLYE  | 892   | 900  | 9              | HLA-A*02:01 | 892           | 41             | GVTONVLYE   | GVTONVLYE   | 29795.95    | 41          | 29795.95     | 41          | TRUE         | TRUE              |
| 1     | VRDPKTSIE  | 562   | 570  | 9              | HLA-A*02:01 | 562           | 41             | VRDPKTSIE   | VRDPKTSIE   | 29803.68    | 41          | 29803.68     | 41          | TRUE         | TRUE              |
| 1     | SSNFGAISS  | 949   | 957  | 9              | HLA-A*02:01 | 949           | 41             | SSNFGAISS   | SSNFGAISS   | 29824       | 41          | 29824        | 41          | TRUE         | TRUE              |
| 1     | CTPALNCY   | 467   | 475  | 9              | HLA-A*02:01 | 467           | 41             | CTPALNCY    | CTPALNCY    | 29828.85    | 41          | 29828.85     | 41          | TRUE         | TRUE              |
| 1     | CAQKFNGLT  | 833   | 841  | 9              | HLA-A*02:01 | 833           | 41             | CAQKFNGLT   | CAQKFNGLT   | 29865.34    | 41          | 29865.34     | 41          | TRUE         | TRUE              |
| 1     | MNNKSQSVI  | 107   | 115  | 9              | HLA-A*02:01 | 107           | 41             | MNNKSQSVI   | MNNKSQSVI   | 29866.31    | 41          | 29866.31     | 41          | TRUE         | TRUE              |
| 1     | PLGINITNF  | 223   | 231  | 9              | HLA-A*02:01 | 223           | 41             | PLGINITNF   | PLGINITNF   | 29883.44    | 41          | 29883.44     | 41          | TRUE         | TRUE              |
| 1     | PFKDGIVFA  | 82    | 90   | 9              | HLA-A*02:01 | 82            | 41             | PFKDGIVFA   | PFKDGIVFA   | 29891.53    | 41          | 29891.53     | 41          | TRUE         | TRUE              |
| 1     | EGGVFNNGT  | 1074  | 1082 | 9              | HLA-A*02:01 | 1074          | 41             | EGGVFNNGT   | EGGVFNNGT   | 29937.16    | 41          | 29937.16     | 41          | TRUE         | TRUE              |
| 1     | VNMFNNGLT  | 525   | 533  | 9              | HLA-A*02:01 | 525           | 41             | VNMFNNGLT   | VNMFNNGLT   | 29942.66    | 41          | 29942.66     | 41          | TRUE         | TRUE              |
| 1     | FGEVFNATK  | 325   | 333  | 9              | HLA-A*02:01 | 325           | 41             | FGEVFNATK   | FGEVFNATK   | 29958.87    | 41          | 29958.87     | 41          | TRUE         | TRUE              |
| 1     | VADYSVLN   | 349   | 357  | 9              | HLA-A*02:01 | 349           | 41             | VADYSVLN    | VADYSVLN    | 29960.16    | 41          | 29960.16     | 41          | TRUE         | TRUE              |
| 1     | DFMGCVLAW  | 415   | 423  | 9              | HLA-A*02:01 | 415           | 41             | DFMGCVLAW   | DFMGCVLAW   | 29995.52    | 41          | 29995.52     | 41          | TRUE         | TRUE              |
| 1     | GGVSVITPG  | 579   | 587  | 9              | HLA-A*02:01 | 579           | 42             | GGVSVITPG   | GGVSVITPG   | 30084.58    | 42          | 30084.58     | 42          | TRUE         | TRUE              |
| 1     | CFSNVYADS  | 378   | 386  | 9              | HLA-A*02:01 | 378           | 42             | CFSNVYADS   | CFSNVYADS   | 30138.33    | 42          | 30138.33     | 42          | TRUE         | TRUE              |
| 1     | VGVLKPTTF  | 254   | 262  | 9              | HLA-A*02:01 | 254           | 42             | VGVLKPTTF   | VGVLKPTTF   | 30171.29    | 42          | 30171.29     | 42          | TRUE         | TRUE              |
| 1     | EIRASANLA  | 999   | 1007 | 9              | HLA-A*02:01 | 999           | 42             | EIRASANLA   | EIRASANLA   | 30191.87    | 42          | 30191.87     | 42          | TRUE         | TRUE              |
| 1     | FGGVSVITP  | 578   | 586  | 9              | HLA-A*02:01 | 578           | 42             | FGGVSVITP   | FGGVSVITP   | 30202.97    | 42          | 30202.97     | 42          | TRUE         | TRUE              |
| 1     | DSEPLVKGV  | 1242  | 1250 | 9              | HLA-A*02:01 | 1242          | 42             | DSEPLVKGV   | DSEPLVKGV   | 30287.74    | 42          | 30287.74     | 42          | TRUE         | TRUE              |
| 1     | VVRDLPSGF  | 205   | 213  | 9              | HLA-A*02:01 | 205           | 42             | VVRDLPSGF   | VVRDLPSGF   | 30295.26    | 42          | 30295.26     | 42          | TRUE         | TRUE              |
| 1     | CYWPINDYG  | 474   | 482  | 9              | HLA-A*02:01 | 474           | 42             | CYWPINDYG   | CYWPINDYG   | 30325.11    | 42          | 30325.11     | 42          | TRUE         | TRUE              |
| 1     | TTAPAICHE  | 1058  | 1066 | 9              | HLA-A*02:01 | 1058          | 42             | TTAPAICHE   | TTAPAICHE   | 30327.42    | 42          | 30327.42     | 42          | TRUE         | TRUE              |
| 1     | RSTSQKSIV  | 667   | 675  | 9              | HLA-A*02:01 | 667           | 42             | RSTSQKSIV   | RSTSQKSIV   | 30351.05    | 42          | 30351.05     | 42          | TRUE         | TRUE              |
| 1     | TVSLLRSTS  | 662   | 670  | 9              | HLA-A*02:01 | 662           | 42             | TVSLLRSTS   | TVSLLRSTS   | 30361.23    | 42          | 30361.23     | 42          | TRUE         | TRUE              |
| 1     | FKHLREFV   | 179   | 187  | 9              | HLA-A*02:01 | 179           | 42             | FKHLREFV    | FKHLREFV    | 30386.85    | 42          | 30386.85     | 42          | TRUE         | TRUE              |
| 1     | KFPSVYAVE  | 333   | 341  | 9              | HLA-A*02:01 | 333           | 42             | KFPSVYAVE   | KFPSVYAVE   | 30392.46    | 42          | 30392.46     | 42          | TRUE         | TRUE              |
| 1     | IQESLTTTS  | 916   | 924  | 9              | HLA-A*02:01 | 916           | 42             | IQESLTTTS   | IQESLTTTS   | 30405.93    | 42          | 30405.93     | 42          | TRUE         | TRUE              |
| 1     | ATSTGNVNY  | 430   | 438  | 9              | HLA-A*02:01 | 430           | 42             | ATSTGNVNY   | ATSTGNVNY   | 30409.55    | 42          | 30409.55     | 42          | TRUE         | TRUE              |
| 1     | VYADSFVVK  | 382   | 390  | 9              | HLA-A*02:01 | 382           | 42             | VYADSFVVK   | VYADSFVVK   | 30416.79    | 42          | 30416.79     | 42          | TRUE         | TRUE              |
| 1     | LTGTGVLTP  | 532   | 540  | 9              | HLA-A*02:01 | 532           | 42             | LTGTGVLTP   | LTGTGVLTP   | 30425.35    | 42          | 30425.35     | 42          | TRUE         | TRUE              |
| 1     | IRASANLAA  | 1000  | 1008 | 9              | HLA-A*02:01 | 1000          | 42             | IRASANLAA   | IRASANLAA   | 30462.91    | 42          | 30462.91     | 42          | TRUE         | TRUE              |
| 1     | ISITTEVMP  | 702   | 710  | 9              | HLA-A*02:01 | 702           | 42             | ISITTEVMP   | ISITTEVMP   | 30472.79    | 42          | 30472.79     | 42          | TRUE         | TRUE              |
| 1     | VTQNVLYEN  | 893   | 901  | 9              | HLA-A*02:01 | 893           | 43             | VTQNVLYEN   | VTQNVLYEN   | 30486.98    | 43          | 30486.98     | 43          | TRUE         | TRUE              |
| 1     | VFTQAGACL  | 628   | 636  | 9              | HLA-A*02:01 | 628           | 43             | VFTQAGACL   | VFTQAGACL   | 30522.29    | 43          | 30522.29     | 43          | TRUE         | TRUE              |
| 1     | ITTTGIGYQP | 485   | 493  | 9              | HLA-A*02:01 | 485           | 43             | ITTTGIGYQP  | ITTTGIGYQP  | 30533.52    | 43          | 30533.52     | 43          | TRUE         | TRUE              |
| 1     | SLCKGACSC  | 1224  | 1232 | 9              | HLA-A*02:01 | 1224          | 43             | SLCKGACSC   | SLCKGACSC   | 30533.85    | 43          | 30533.85     | 43          | TRUE         | TRUE              |
| 1     | LICAQKFN   | 831   | 839  | 9              | HLA-A*02:01 | 831           | 43             | LICAQKFN    | LICAQKFN    | 30576.16    | 43          | 30576.16     | 43          | TRUE         | TRUE              |
| 1     | GKPCPTPAL  | 464   | 472  | 9              | HLA-A*02:01 | 464           | 43             | GKPCPTPAL   | GKPCPTPAL   | 30577.5     | 43          | 30577.5      | 43          | TRUE         | TRUE              |
| 1     | FSPQIITD   | 1092  | 1100 | 9              | HLA-A*02:01 | 1092          | 43             | FSPQIITD    | FSPQIITD    | 30708.78    | 43          | 30708.78     | 43          | TRUE         | TRUE              |
| 1     | NVIRACNF   | 122   | 130  | 9              | HLA-A*02:01 | 122           | 43             | NVIRACNF    | NVIRACNF    | 30723.08    | 43          | 30723.08     | 43          | TRUE         | TRUE              |
| 1     | YSTGNVNFQ  | 622   | 630  | 9              | HLA-A*02:01 | 622           | 43             | YSTGNVNFQ   | YSTGNVNFQ   | 30727.74    | 43          | 30727.74     | 43          | TRUE         | TRUE              |
| 1     | DISPCSGGG  | 572   | 580  | 9              | HLA-A*02:01 | 572           | 43             | DISPCSGGG   | DISPCSGGG   | 30777.3     | 43          | 30777.3      | 43          | TRUE         | TRUE              |
| 1     | NGLTGTGVL  | 530   | 538  | 9              | HLA-A*02:01 | 530           | 43             | NGLTGTGVL   | NGLTGTGVL   | 30815.97    | 43          | 30815.97     | 43          | TRUE         | TRUE              |
| 1     | LIDLQELGK  | 1179  | 1187 | 9              | HLA-A*02:01 | 1179          | 43             | LIDLQELGK   | LIDLQELGK   | 30821.97    | 43          | 30821.97     | 43          | TRUE         | TRUE              |
| 1     | FKCYGVSAT  | 364   | 372  | 9              | HLA-A*02:01 | 364           | 43             | FKCYGVSAT   | FKCYGVSAT   | 30899.43    | 43          | 30899.43     | 43          | TRUE         | TRUE              |
| 1     | STGNVNNKY  | 432   | 440  | 9              | HLA-A*02:01 | 432           | 44             | STGNVNNKY   | STGNVNNKY   | 30949.95    | 44          | 30949.95     | 44          | TRUE         | TRUE              |
| 1     | TUNFGGHN   | 775   | 783  | 9              | HLA-A*02:01 | 775           | 44             | TUNFGGHN    | TUNFGGHN    | 31013.98    | 44          | 31013.98     | 44          | TRUE         | TRUE              |
| 1     | QTSNFRVVP  | 301   | 309  | 9              | HLA-A*02:01 | 301           | 44             | QTSNFRVVP   | QTSNFRVVP   | 31024.39    | 44          | 31024.39     | 44          | TRUE         | TRUE              |
| 1     | CVLAWNTRN  | 419   | 427  | 9              | HLA-A*02:01 | 419           | 44             | CVLAWNTRN   | CVLAWNTRN   | 31039.16    | 44          | 31039.16     | 44          | TRUE         | TRUE              |
| 1     | ENGTITDAV  | 268   | 276  | 9              | HLA-A*02:01 | 268           | 44             | ENGTITDAV   | ENGTITDAV   | 31085.19    | 44          | 31085.19     | 44          | TRUE         | TRUE              |
| 1     | NFRALITAF  | 230   | 238  | 9              | HLA-A*02:01 | 230           | 44             | NFRALITAF   | NFRALITAF   | 31120.87    | 44          | 31120.87     | 44          | TRUE         | TRUE              |
| 1     | IQHEGKAYF  | 1063  | 1071 | 9              | HLA-A*02:01 | 1063          | 44             | IQHEGKAYF   | IQHEGKAYF   | 31147.14    | 44          | 31147.14     | 44          | TRUE         | TRUE              |
| 1     | SWFITQRNF  | 1083  | 1091 | 9              | HLA-A*02:01 | 1083          | 44             | SWFITQRNF   | SWFITQRNF   | 31150.51    | 44          | 31150.51     | 44          | TRUE         | TRUE              |
| 1     | QPIDVVRDL  | 201   | 209  | 9              | HLA-A*02:01 | 201           | 44             | QPIDVVRDL   | QPIDVVRDL   | 31194.04    | 44          | 31194.04     | 44          | TRUE         | TRUE              |
| 1     | SLDVSSEKS  | 169   | 177  | 9              | HLA-A*02:01 | 169           | 44             | SLDVSSEKS   | SLDVSSEKS   | 31233.21    | 44          | 31233.21     | 44          | TRUE         | TRUE              |
| 1     | KTSVDCNMV  | 715   | 723  | 9              | HLA-A*02:01 | 715           | 44             | KTSVDCNMV   | KTSVDCNMV   | 31325.6     | 44          | 31325.6      | 44          | TRUE         | TRUE              |
| 1     | SVHTVSLRL  | 659   | 667  | 9              | HLA-A*02:01 | 659           | 45             | SVHTVSLRL   | SVHTVSLRL   | 31395.49    | 45          | 31395.49     | 45          | TRUE         | TRUE              |
| 1     | QQFGRDVS   | 549   | 557  | 9              | HLA-A*02:01 | 549           | 45             | QQFGRDVS    | QQFGRDVS    | 31460.78    | 45          | 31460.78     | 45          | TRUE         | TRUE              |
| 1     | FTTAPAICH  | 1057  | 1065 | 9              | HLA-A*02:01 | 1057          | 45             | FTTAPAICH   | FTTAPAICH   | 31489.05    | 45          | 31489.05     | 45          | TRUE         | TRUE              |
| 1     | DDFMGCVLA  | 414   | 422  | 9              | HLA-A*02:01 | 414           | 45             | DDFMGCVLA   | DDFMGCVLA   | 31519.39    | 45          | 31519.39     | 45          | TRUE         | TRUE              |
| 1     | FGAISSVLN  | 952   | 960  | 9              | HLA-A*02:01 | 952           | 45             | FGAISSVLN   | FGAISSVLN   | 31522.46    | 45          | 31522.46     | 45          | TRUE         | TRUE              |
| 1     | RFQPFQFQG  | 544   | 552  | 9              | HLA-A*02:01 | 544           | 45             | RFQPFQFQG   | RFQPFQFQG   | 31527.91    | 45          | 31527.91     | 45          | TRUE         | TRUE              |
| 1     | GDINARDUJ  | 824   | 832  | 9              | HLA-A*02:01 | 824           | 45             | GDINARDUJ   | GDINARDUJ   | 31552.13    | 45          | 31552.13     | 45          | TRUE         | TRUE              |
| 1     | ITDAVDCSQ  | 272   | 280  | 9              | HLA-A*02:01 | 272           | 45             | ITDAVDCSQ   | ITDAVDCSQ   | 31561.35    | 45          | 31561.35     | 45          | TRUE         | TRUE              |
| 1     | LVKQLSSNF  | 944   | 952  | 9              | HLA-A*02:01 | 944           | 45             | LVKQLSSNF   | LVKQLSSNF   | 31576.05    | 45          | 31576.05     | 45          | TRUE         | TRUE              |
| 1     | IRACNFELC  | 125   | 133  | 9              | HLA-A*02:01 | 125           | 45             | IRACNFELC   | IRACNFELC   | 31585.95    | 45          | 31585.95     | 45          | TRUE         | TRUE              |
| 1     | KPTPLKYFG  | 772   | 780  | 9              | HLA-A*02:01 | 772           | 45             | KPTPLKYFG   | KPTPLKYFG   | 31621.86    | 45          | 31621.86     | 45          | TRUE         | TRUE              |
| 1     | KRFQPFQFQ  | 543   | 551  | 9              | HLA-A*02:01 | 543           | 45             | KRFQPFQFQ   | KRFQPFQFQ   | 31664.31    | 45          | 31664.31     | 45          | TRUE         | TRUE              |
| 1     | GFMMQYQEC  | 814   | 822  | 9              | HLA-A*02:01 | 814           | 45             | GFMMQYQEC   | GFMMQYQEC   | 31705.46    | 45          | 31705.46     | 45          | TRUE         | TRUE              |
| 1     | TAIHADQLT  | 608   | 616  | 9              | HLA-A*02:01 | 608           | 45             | TAIHADQLT   | TAIHADQLT   | 31719.53    | 45          | 31719.53     | 45          | TRUE         | TRUE              |
| 1     | LTAFSPAQD  | 235   | 243  | 9              | HLA-A*02:01 | 235           | 45             | LTAFSPAQD   | LTAFSPAQD   | 31740.81    | 45          | 31740.81     | 45          | TRUE         | TRUE              |
| 1     | LADAGFMKQ  | 810   | 818  | 9              | HLA-A*02:01 | 810           | 46             | LADAGFMKQ   | LADAGFMKQ   | 31763.48    | 46          | 31763.48     | 46          | TRUE         | TRUE              |
| 1     | QAAPHGVVF  | 1036  | 1044 | 9              | HLA-A*02:01 | 1036          | 46             | QAAPHGVVF   | QAAPHGVVF   | 31787.54    | 46          | 31787.54     | 46          | TRUE         | TRUE              |
| 1     | KYDENGITIT | 265   | 273  | 9              | HLA-A*02:01 | 265           | 46             | KYDENGITIT  | KYDENGITIT  | 31790.98    | 46          | 31790.98     | 46          | TRUE         | TRUE              |
| 1     | TEVMPVMSMA | 706   |      |                |             |               |                |             |             |             |             |              |             |              |                   |

| seq # | peptide    | start | end  | peptide length | allele      | peptide index | median binding | netmhcan.ba | netmhcan.ba | netmhcan.ba | netmhcan.ba | legacy score | legacy rank | scores equal | percentiles equal |
|-------|------------|-------|------|----------------|-------------|---------------|----------------|-------------|-------------|-------------|-------------|--------------|-------------|--------------|-------------------|
| 1     | LPPLTDDM   | 843   | 851  | 9              | HLA-A*02:01 | 843           | 48             | LPPLTDDM    | LPPLTDDM    | 32657       | 48          | 32657        | 48          | TRUE         | TRUE              |
| 1     | CTDVSTAIH  | 603   | 611  | 9              | HLA-A*02:01 | 603           | 48             | CTDVSTAIH   | CTDVSTAIH   | 32707.57    | 48          | 32707.57     | 48          | TRUE         | TRUE              |
| 1     | IGAEHVDT5  | 637   | 645  | 9              | HLA-A*02:01 | 637           | 48             | IGAEHVDT5   | IGAEHVDT5   | 32709.7     | 48          | 32709.7      | 48          | TRUE         | TRUE              |
| 1     | QDLFLPFYS  | 56    | 64   | 9              | HLA-A*02:01 | 56            | 48             | QDLFLPFYS   | QDLFLPFYS   | 32715.71    | 48          | 32715.71     | 48          | TRUE         | TRUE              |
| 1     | TITDAVDCS  | 271   | 279  | 9              | HLA-A*02:01 | 271           | 48             | TITDAVDCS   | TITDAVDCS   | 32729.15    | 48          | 3.27E+04     | 48          | TRUE         | TRUE              |
| 1     | TSCCSCLUG  | 1220  | 1228 | 9              | HLA-A*02:01 | 1220          | 48             | TSCCSCLUG   | TSCCSCLUG   | 32731.64    | 48          | 3.27E+04     | 48          | TRUE         | TRUE              |
| 1     | LSRLDKVEA  | 963   | 971  | 9              | HLA-A*02:01 | 963           | 49             | LSRLDKVEA   | LSRLDKVEA   | 32927.72    | 49          | 3.29E+04     | 49          | TRUE         | TRUE              |
| 1     | PIGAGICAS  | 651   | 659  | 9              | HLA-A*02:01 | 651           | 49             | PIGAGICAS   | PIGAGICAS   | 32965.13    | 49          | 3.30E+04     | 49          | TRUE         | TRUE              |
| 1     | YKGYQPIDV  | 197   | 205  | 9              | HLA-A*02:01 | 197           | 49             | YKGYQPIDV   | YKGYQPIDV   | 32971.55    | 49          | 3.30E+04     | 49          | TRUE         | TRUE              |
| 1     | EIFRSOTLY  | 45    | 53   | 9              | HLA-A*02:01 | 45            | 49             | EIFRSOTLY   | EIFRSOTLY   | 33016.12    | 49          | 3.30E+04     | 49          | TRUE         | TRUE              |
| 1     | VFNKKGDFL  | 186   | 194  | 9              | HLA-A*02:01 | 186           | 49             | VFNKKGDFL   | VFNKKGDFL   | 33030.12    | 49          | 3.30E+04     | 49          | TRUE         | TRUE              |
| 1     | KSQSVIIN   | 110   | 118  | 9              | HLA-A*02:01 | 110           | 49             | KSQSVIIN    | KSQSVIIN    | 33053.35    | 49          | 3.31E+04     | 49          | TRUE         | TRUE              |
| 1     | AVSKPMGTQ  | 139   | 147  | 9              | HLA-A*02:01 | 139           | 49             | AVSKPMGTQ   | AVSKPMGTQ   | 33066.59    | 49          | 3.31E+04     | 49          | TRUE         | TRUE              |
| 1     | AYFVGYLKP  | 251   | 259  | 9              | HLA-A*02:01 | 251           | 49             | AYFVGYLKP   | AYFVGYLKP   | 33173.39    | 49          | 3.32E+04     | 49          | TRUE         | TRUE              |
| 1     | NHTFGNPVI  | 73    | 81   | 9              | HLA-A*02:01 | 73            | 49             | NHTFGNPVI   | NHTFGNPVI   | 33228.7     | 49          | 3.32E+04     | 49          | TRUE         | TRUE              |
| 1     | TAPAIHCEG  | 1059  | 1067 | 9              | HLA-A*02:01 | 1059          | 50             | TAPAIHCEG   | TAPAIHCEG   | 33252.79    | 50          | 3.33E+04     | 50          | TRUE         | TRUE              |
| 1     | TFSTFKCY   | 359   | 367  | 9              | HLA-A*02:01 | 359           | 50             | TFSTFKCY    | TFSTFKCY    | 33256.39    | 50          | 3.33E+04     | 50          | TRUE         | TRUE              |
| 1     | PFYSNVTGF  | 61    | 69   | 9              | HLA-A*02:01 | 61            | 50             | PFYSNVTGF   | PFYSNVTGF   | 33272.59    | 50          | 3.33E+04     | 50          | TRUE         | TRUE              |
| 1     | TFDDVOAPN  | 21    | 29   | 9              | HLA-A*02:01 | 21            | 50             | TFDDVOAPN   | TFDDVOAPN   | 33273.21    | 50          | 3.33E+04     | 50          | TRUE         | TRUE              |
| 1     | IYFAATEKS  | 87    | 95   | 9              | HLA-A*02:01 | 87            | 50             | IYFAATEKS   | IYFAATEKS   | 33287.36    | 50          | 3.33E+04     | 50          | TRUE         | TRUE              |
| 1     | CYGVSATKL  | 366   | 374  | 9              | HLA-A*02:01 | 366           | 50             | CYGVSATKL   | CYGVSATKL   | 33293.84    | 50          | 3.33E+04     | 50          | TRUE         | TRUE              |
| 1     | CGPKLSTDL  | 511   | 519  | 9              | HLA-A*02:01 | 511           | 50             | CGPKLSTDL   | CGPKLSTDL   | 33304.3     | 50          | 3.33E+04     | 50          | TRUE         | TRUE              |
| 1     | LYKDENGTL  | 264   | 272  | 9              | HLA-A*02:01 | 264           | 50             | LYKDENGTL   | LYKDENGTL   | 33307.18    | 50          | 3.33E+04     | 50          | TRUE         | TRUE              |
| 1     | ITFMUKYDE  | 260   | 268  | 9              | HLA-A*02:01 | 260           | 50             | ITFMUKYDE   | ITFMUKYDE   | 33328.79    | 50          | 3.33E+04     | 50          | TRUE         | TRUE              |
| 1     | ELKCSVKSF  | 285   | 293  | 9              | HLA-A*02:01 | 285           | 50             | ELKCSVKSF   | ELKCSVKSF   | 33332.4     | 50          | 3.33E+04     | 50          | TRUE         | TRUE              |
| 1     | ANLLQVGS   | 732   | 740  | 9              | HLA-A*02:01 | 732           | 50             | ANLLQVGS    | ANLLQVGS    | 33354.42    | 50          | 3.34E+04     | 50          | TRUE         | TRUE              |
| 1     | FFAVSKPMG  | 137   | 145  | 9              | HLA-A*02:01 | 137           | 50             | FFAVSKPMG   | FFAVSKPMG   | 33445.84    | 50          | 3.34E+04     | 50          | TRUE         | TRUE              |
| 1     | QHTSSMRGV  | 32    | 40   | 9              | HLA-A*02:01 | 32            | 50             | QHTSSMRGV   | QHTSSMRGV   | 33467.57    | 50          | 3.35E+04     | 50          | TRUE         | TRUE              |
| 1     | DVNVNQAQA  | 932   | 940  | 9              | HLA-A*02:01 | 932           | 50             | DVNVNQAQA   | DVNVNQAQA   | 33521.94    | 50          | 3.35E+04     | 50          | TRUE         | TRUE              |
| 1     | KGGDVROQIA | 390   | 398  | 9              | HLA-A*02:01 | 390           | 50             | KGGDVROQIA  | KGGDVROQIA  | 33541.16    | 50          | 3.35E+04     | 50          | TRUE         | TRUE              |
| 1     | EVFNATKFP  | 327   | 335  | 9              | HLA-A*02:01 | 327           | 50             | EVFNATKFP   | EVFNATKFP   | 33541.53    | 50          | 3.35E+04     | 50          | TRUE         | TRUE              |
| 1     | AGFMKQYGE  | 813   | 821  | 9              | HLA-A*02:01 | 813           | 50             | AGFMKQYGE   | AGFMKQYGE   | 33567.65    | 50          | 3.36E+04     | 50          | TRUE         | TRUE              |
| 1     | KHLREFVFK  | 180   | 188  | 9              | HLA-A*02:01 | 180           | 51             | KHLREFVFK   | KHLREFVFK   | 33648.02    | 51          | 3.36E+04     | 51          | TRUE         | TRUE              |
| 1     | IADYNYKLP  | 405   | 413  | 9              | HLA-A*02:01 | 405           | 51             | IADYNYKLP   | IADYNYKLP   | 33674.98    | 51          | 3.37E+04     | 51          | TRUE         | TRUE              |
| 1     | PTLYKGGF   | 774   | 782  | 9              | HLA-A*02:01 | 774           | 51             | PTLYKGGF    | PTLYKGGF    | 33683.36    | 51          | 3.37E+04     | 51          | TRUE         | TRUE              |
| 1     | TDDMIAAYT  | 848   | 856  | 9              | HLA-A*02:01 | 848           | 51             | TDDMIAAYT   | TDDMIAAYT   | 33740.62    | 51          | 3.37E+04     | 51          | TRUE         | TRUE              |
| 1     | SVKSFIEDK  | 289   | 297  | 9              | HLA-A*02:01 | 289           | 51             | SVKSFIEDK   | SVKSFIEDK   | 33762.52    | 51          | 3.38E+04     | 51          | TRUE         | TRUE              |
| 1     | NYNKKYRRL  | 435   | 443  | 9              | HLA-A*02:01 | 435           | 51             | NYNKKYRRL   | NYNKKYRRL   | 33787.01    | 51          | 3.38E+04     | 51          | TRUE         | TRUE              |
| 1     | GAISVLND   | 953   | 961  | 9              | HLA-A*02:01 | 953           | 51             | GAISVLND    | GAISVLND    | 33854.34    | 51          | 3.39E+04     | 51          | TRUE         | TRUE              |
| 1     | YGFSCTQLN  | 738   | 746  | 9              | HLA-A*02:01 | 738           | 51             | YGFSCTQLN   | YGFSCTQLN   | 33877.79    | 51          | 3.39E+04     | 51          | TRUE         | TRUE              |
| 1     | FYTTTGIGY  | 483   | 491  | 9              | HLA-A*02:01 | 483           | 51             | FYTTTGIGY   | FYTTTGIGY   | 33888.44    | 51          | 3.39E+04     | 51          | TRUE         | TRUE              |
| 1     | TATAGWTFG  | 863   | 871  | 9              | HLA-A*02:01 | 863           | 51             | TATAGWTFG   | TATAGWTFG   | 33894.29    | 51          | 3.39E+04     | 51          | TRUE         | TRUE              |
| 1     | ERNFTTAPA  | 1054  | 1062 | 9              | HLA-A*02:01 | 1054          | 52             | ERNFTTAPA   | ERNFTTAPA   | 33974.7     | 52          | 3.40E+04     | 52          | TRUE         | TRUE              |
| 1     | KSGNFKHLR  | 175   | 183  | 9              | HLA-A*02:01 | 175           | 52             | KSGNFKHLR   | KSGNFKHLR   | 34049.04    | 52          | 3.40E+04     | 52          | TRUE         | TRUE              |
| 1     | KPIFKPLG   | 217   | 225  | 9              | HLA-A*02:01 | 217           | 52             | KPIFKPLG    | KPIFKPLG    | 34056.41    | 52          | 3.41E+04     | 52          | TRUE         | TRUE              |
| 1     | MYCGDSTE   | 722   | 730  | 9              | HLA-A*02:01 | 722           | 52             | MYCGDSTE    | MYCGDSTE    | 34116.89    | 52          | 3.41E+04     | 52          | TRUE         | TRUE              |
| 1     | QPYRVVVL5  | 492   | 500  | 9              | HLA-A*02:01 | 492           | 52             | QPYRVVVL5   | QPYRVVVL5   | 34126.13    | 52          | 3.41E+04     | 52          | TRUE         | TRUE              |
| 1     | YQPIDVVRD  | 200   | 208  | 9              | HLA-A*02:01 | 200           | 52             | YQPIDVVRD   | YQPIDVVRD   | 34131.66    | 52          | 3.41E+04     | 52          | TRUE         | TRUE              |
| 1     | VSMAKTSVD  | 711   | 719  | 9              | HLA-A*02:01 | 711           | 52             | VSMAKTSVD   | VSMAKTSVD   | 34137.2     | 52          | 3.41E+04     | 52          | TRUE         | TRUE              |
| 1     | ICASYHTVS  | 656   | 664  | 9              | HLA-A*02:01 | 656           | 52             | ICASYHTVS   | ICASYHTVS   | 34141.63    | 52          | 3.41E+04     | 52          | TRUE         | TRUE              |
| 1     | SNVVRGWVF  | 95    | 103  | 9              | HLA-A*02:01 | 95            | 52             | SNVVRGWVF   | SNVVRGWVF   | 34168.61    | 52          | 3.42E+04     | 52          | TRUE         | TRUE              |
| 1     | LAWNTRNID  | 421   | 429  | 9              | HLA-A*02:01 | 421           | 52             | LAWNTRNID   | LAWNTRNID   | 34192.29    | 52          | 3.42E+04     | 52          | TRUE         | TRUE              |
| 1     | QCQVNFNG   | 523   | 531  | 9              | HLA-A*02:01 | 523           | 52             | QCQVNFNG    | QCQVNFNG    | 34198.95    | 52          | 3.42E+04     | 52          | TRUE         | TRUE              |
| 1     | YRVVLSLFE  | 494   | 502  | 9              | HLA-A*02:01 | 494           | 52             | YRVVLSLFE   | YRVVLSLFE   | 34221.14    | 52          | 3.42E+04     | 52          | TRUE         | TRUE              |
| 1     | TSIGNYNYK  | 431   | 439  | 9              | HLA-A*02:01 | 431           | 52             | TSIGNYNYK   | TSIGNYNYK   | 34240.04    | 52          | 3.42E+04     | 52          | TRUE         | TRUE              |
| 1     | SOLDRCTTF  | 14    | 22   | 9              | HLA-A*02:01 | 14            | 53             | SOLDRCTTF   | SOLDRCTTF   | 34257.82    | 53          | 3.43E+04     | 53          | TRUE         | TRUE              |
| 1     | ATVCGPKLS  | 508   | 516  | 9              | HLA-A*02:01 | 508           | 53             | ATVCGPKLS   | ATVCGPKLS   | 34294.54    | 53          | 3.43E+04     | 53          | TRUE         | TRUE              |
| 1     | CSLKGAGS   | 1223  | 1231 | 9              | HLA-A*02:01 | 1223          | 53             | CSLKGAGS    | CSLKGAGS    | 34243.36    | 53          | 3.43E+04     | 53          | TRUE         | TRUE              |
| 1     | DVNCITDVT  | 600   | 608  | 9              | HLA-A*02:01 | 600           | 53             | DVNCITDVT   | DVNCITDVT   | 34370.7     | 53          | 3.44E+04     | 53          | TRUE         | TRUE              |
| 1     | RSDTLYLTQ  | 48    | 56   | 9              | HLA-A*02:01 | 48            | 53             | RSDTLYLTQ   | RSDTLYLTQ   | 34376.27    | 53          | 3.44E+04     | 53          | TRUE         | TRUE              |
| 1     | TTTSTAIGK  | 921   | 929  | 9              | HLA-A*02:01 | 921           | 53             | TTTSTAIGK   | TTTSTAIGK   | 34397.49    | 53          | 3.44E+04     | 53          | TRUE         | TRUE              |
| 1     | KGIQYTSNF  | 297   | 305  | 9              | HLA-A*02:01 | 297           | 53             | KGIQYTSNF   | KGIQYTSNF   | 34400.46    | 53          | 3.44E+04     | 53          | TRUE         | TRUE              |
| 1     | VOAPNYTQH  | 25    | 33   | 9              | HLA-A*02:01 | 25            | 53             | VOAPNYTQH   | VOAPNYTQH   | 34406.78    | 53          | 3.44E+04     | 53          | TRUE         | TRUE              |
| 1     | FRVVP5GDV  | 305   | 313  | 9              | HLA-A*02:01 | 305           | 53             | FRVVP5GDV   | FRVVP5GDV   | 34455.21    | 53          | 3.45E+04     | 53          | TRUE         | TRUE              |
| 1     | FYSVNTGFH  | 62    | 70   | 9              | HLA-A*02:01 | 62            | 53             | FYSVNTGFH   | FYSVNTGFH   | 34457.46    | 53          | 3.45E+04     | 53          | TRUE         | TRUE              |
| 1     | EQYIKWPWY  | 1189  | 1197 | 9              | HLA-A*02:01 | 1189          | 53             | EQYIKWPWY   | EQYIKWPWY   | 34484.31    | 53          | 3.45E+04     | 53          | TRUE         | TRUE              |
| 1     | RDLPSGFNT  | 207   | 215  | 9              | HLA-A*02:01 | 207           | 53             | RDLPSGFNT   | RDLPSGFNT   | 34528.35    | 53          | 3.45E+04     | 53          | TRUE         | TRUE              |
| 1     | TDLIKNCQV  | 517   | 525  | 9              | HLA-A*02:01 | 517           | 53             | TDLIKNCQV   | TDLIKNCQV   | 34564.62    | 53          | 3.46E+04     | 53          | TRUE         | TRUE              |
| 1     | ISIQOESLT  | 913   | 921  | 9              | HLA-A*02:01 | 913           | 54             | ISIQOESLT   | ISIQOESLT   | 34566.11    | 54          | 3.46E+04     | 54          | TRUE         | TRUE              |
| 1     | AYFPREGVF  | 1069  | 1077 | 9              | HLA-A*02:01 | 1069          | 54             | AYFPREGVF   | AYFPREGVF   | 34583.33    | 54          | 3.46E+04     | 54          | TRUE         | TRUE              |
| 1     | RACNFELCD  | 126   | 134  | 9              | HLA-A*02:01 | 126           | 54             | RACNFELCD   | RACNFELCD   | 34608.41    | 54          | 3.46E+04     | 54          | TRUE         | TRUE              |
| 1     | KDGIYFAAT  | 84    | 92   | 9              | HLA-A*02:01 | 84            | 54             | KDGIYFAAT   | KDGIYFAAT   | 34630.13    | 54          | 3.46E+04     | 54          | TRUE         | TRUE              |
| 1     | VVP5GDVVR  | 307   | 315  | 9              | HLA-A*02:01 | 307           | 54             | VVP5GDVVR   | VVP5GDVVR   | 34704.76    | 54          | 3.47E+04     | 54          | TRUE         | TRUE              |
| 1     | GWTFGAGAA  | 867   | 875  | 9              | HLA-A*02:01 | 867           | 54             | GWTFGAGAA   | GWTFGAGAA   | 34712.28    | 54          | 3.47E+04     | 54          | TRUE         | TRUE              |
| 1     | ATKLNLCF   | 371   | 379  | 9              | HLA-A*02:01 | 371           | 54             | ATKLNLCF    | ATKLNLCF    | 34753.63    | 54          | 3.48E+04     | 54          | TRUE         | TRUE              |
| 1     | IYSTGNVNF  | 621   | 629  | 9              | HLA-A*02:01 | 621           | 54             | IYSTGNVNF   | IYSTGNVNF   | 34777.3     | 54          | 3.48E+04     | 54          | TRUE         | TRUE              |
| 1     | ICGDSATECA | 724   | 732  | 9              | HLA-A*02:01 | 724           | 54             | ICGDSATECA  | ICGDSATECA  | 34882.83    | 54          | 3.49E+04     | 54          | TRUE         | TRUE              |
| 1     | DLDRCTTFD  | 15    | 23   | 9              | HLA-A*02:01 | 15            | 54             | DLDRCTTFD   | DLDRCTTFD   | 34890.39    | 54          | 3.49E+04     | 54          | TRUE         | TRUE              |
| 1     | VFAQVKQMY  | 763   | 771  | 9              | HLA-A*02:01 | 763           | 55             | VFAQVKQMY   | VFAQVKQMY   | 34984.12    | 55          | 3.50E+04     | 55          | TRUE         | TRUE              |
| 1     | SGTATAGWT  | 861   | 869  | 9              | HLA-A*02:01 | 861           | 55             | SGTATAGWT   | SGTATAGWT   | 34994.73    | 55          | 3.50E+04     | 55          | TRUE         | TRUE              |
| 1     | VIPFKDGIY  | 80    | 88   | 9              | HLA-A*02:01 | 80            | 55             | VIPFKDGIY   | VIPFKDGIY   | 34996.62    | 55          | 3.50E+04     | 55          | TRUE         | TRUE              |
| 1     | PHGVVFLHV  | 1039  | 1047 | 9              | HLA-A*02:01 | 1039          | 55             | PHGVVFLHV   | PHGVVFLHV   | 35024.67    | 55          | 3.50E+04     | 55          | TRUE         | TRUE              |
| 1     | GSOLDRCTT  | 13    | 21   | 9              | HLA-A*02:01 | 13            | 55             | GSOLDRCTT   | GSOLDRCTT   | 35044.75    | 55          | 3.50E+04     | 55          | TRUE         | TRUE              |
| 1     | GNFKHLREF  | 177   | 185  | 9              | HLA-A*02:01 | 177           | 55             | GNFKHLREF   | GNFKHLREF   | 35109.65    | 55          | 3.51E+04     | 55          | TRUE         | TRUE              |
| 1     | FGSTMNNKS  | 103   | 111  | 9              | HLA-A*02:01 | 103           | 55             | FGSTMNNKS   | FGSTMNNKS   | 35157.91    | 55          | 3.52E+04     | 55          | TRUE         | TRUE              |
| 1     |            |       |      |                |             |               |                |             |             |             |             |              |             |              |                   |

| seq # | peptide    | start | end  | peptide length | allele      | peptide index | median binding | netmhcan_ba | netmhcan_ba | netmhcan_ba | netmhcan_ba | legacy score | legacy rank | scores equal | percentiles equal |
|-------|------------|-------|------|----------------|-------------|---------------|----------------|-------------|-------------|-------------|-------------|--------------|-------------|--------------|-------------------|
| 1     | ARDUCAQK   | 828   | 836  | 9              | HLA-A*02:01 | 828           | 57             | ARDUCAQK    | ARDUCAQK    | 35753.67    | 57          | 3.58E+04     | 57          | TRUE         | TRUE              |
| 1     | HVTYVPSQE  | 1046  | 1054 | 9              | HLA-A*02:01 | 1046          | 57             | HVTYVPSQE   | HVTYVPSQE   | 35754.84    | 57          | 3.58E+04     | 57          | TRUE         | TRUE              |
| 1     | STMMNKSQS  | 105   | 113  | 9              | HLA-A*02:01 | 105           | 57             | STMMNKSQS   | STMMNKSQS   | 35759.48    | 57          | 3.58E+04     | 57          | TRUE         | TRUE              |
| 1     | TSSMRGVVY  | 34    | 42   | 9              | HLA-A*02:01 | 34            | 57             | TSSMRGVVY   | TSSMRGVVY   | 35777.68    | 57          | 3.58E+04     | 57          | TRUE         | TRUE              |
| 1     | PFGEVFNAT  | 324   | 332  | 9              | HLA-A*02:01 | 324           | 57             | PFGEVFNAT   | PFGEVFNAT   | 35833.07    | 57          | 3.58E+04     | 57          | TRUE         | TRUE              |
| 1     | NASVSVNIQK | 1155  | 1163 | 9              | HLA-A*02:01 | 1155          | 57             | NASVSVNIQK  | NASVSVNIQK  | 35833.47    | 57          | 3.58E+04     | 57          | TRUE         | TRUE              |
| 1     | DEDDSEPLV  | 1239  | 1247 | 9              | HLA-A*02:01 | 1239          | 58             | DEDDSEPLV   | DEDDSEPLV   | 35852.08    | 58          | 3.59E+04     | 58          | TRUE         | TRUE              |
| 1     | CNFECLDNP  | 128   | 136  | 9              | HLA-A*02:01 | 128           | 58             | CNFECLDNP   | CNFECLDNP   | 35885.06    | 58          | 3.59E+04     | 58          | TRUE         | TRUE              |
| 1     | VDTSYECDI  | 642   | 650  | 9              | HLA-A*02:01 | 642           | 58             | VDTSYECDI   | VDTSYECDI   | 35897.1     | 58          | 3.59E+04     | 58          | TRUE         | TRUE              |
| 1     | HTSSMRGVVY | 33    | 41   | 9              | HLA-A*02:01 | 33            | 58             | HTSSMRGVVY  | HTSSMRGVVY  | 35897.49    | 58          | 3.59E+04     | 58          | TRUE         | TRUE              |
| 1     | TKFPSVYAW  | 332   | 340  | 9              | HLA-A*02:01 | 332           | 58             | TKFPSVYAW   | TKFPSVYAW   | 35925.07    | 58          | 3.59E+04     | 58          | TRUE         | TRUE              |
| 1     | IGVTQNVLY  | 891   | 899  | 9              | HLA-A*02:01 | 891           | 58             | IGVTQNVLY   | IGVTQNVLY   | 35972.53    | 58          | 3.60E+04     | 58          | TRUE         | TRUE              |
| 1     | VVRFPNITN  | 313   | 321  | 9              | HLA-A*02:01 | 313           | 58             | VVRFPNITN   | VVRFPNITN   | 35981.86    | 58          | 3.60E+04     | 58          | TRUE         | TRUE              |
| 1     | QAPNYTQHT  | 26    | 34   | 9              | HLA-A*02:01 | 26            | 58             | QAPNYTQHT   | QAPNYTQHT   | 36010.3     | 58          | 3.60E+04     | 58          | TRUE         | TRUE              |
| 1     | ELDKYFNKH  | 1133  | 1141 | 9              | HLA-A*02:01 | 1133          | 58             | ELDKYFNKH   | ELDKYFNKH   | 36011.85    | 58          | 3.60E+04     | 58          | TRUE         | TRUE              |
| 1     | NQCVNFFNF  | 522   | 530  | 9              | HLA-A*02:01 | 522           | 58             | NQCVNFFNF   | NQCVNFFNF   | 36018.1     | 58          | 3.60E+04     | 58          | TRUE         | TRUE              |
| 1     | FKELDKYF   | 1130  | 1138 | 9              | HLA-A*02:01 | 1130          | 58             | FKELDKYF    | FKELDKYF    | 36030.18    | 58          | 3.60E+04     | 58          | TRUE         | TRUE              |
| 1     | NFSQILPOP  | 783   | 791  | 9              | HLA-A*02:01 | 783           | 58             | NFSQILPOP   | NFSQILPOP   | 36035.25    | 58          | 3.60E+04     | 58          | TRUE         | TRUE              |
| 1     | NRLSGIAIA  | 746   | 754  | 9              | HLA-A*02:01 | 746           | 58             | NRLSGIAIA   | NRLSGIAIA   | 36038.36    | 58          | 3.60E+04     | 58          | TRUE         | TRUE              |
| 1     | GFYTTTGIG  | 482   | 490  | 9              | HLA-A*02:01 | 482           | 58             | GFYTTTGIG   | GFYTTTGIG   | 36077.78    | 58          | 3.61E+04     | 58          | TRUE         | TRUE              |
| 1     | LCMTSCSCS  | 1216  | 1224 | 9              | HLA-A*02:01 | 1216          | 58             | LCMTSCSCS   | LCMTSCSCS   | 36078.15    | 58          | 3.61E+04     | 58          | TRUE         | TRUE              |
| 1     | CSVSKFEID  | 288   | 296  | 9              | HLA-A*02:01 | 288           | 58             | CSVSKFEID   | CSVSKFEID   | 36083.62    | 58          | 3.61E+04     | 58          | TRUE         | TRUE              |
| 1     | PNITNLCPF  | 317   | 325  | 9              | HLA-A*02:01 | 317           | 58             | PNITNLCPF   | PNITNLCPF   | 36126.6     | 58          | 3.61E+04     | 58          | TRUE         | TRUE              |
| 1     | LTSGSDLDL  | 10    | 18   | 9              | HLA-A*02:01 | 10            | 59             | LTSGSDLDL   | LTSGSDLDL   | 36159.45    | 59          | 3.62E+04     | 59          | TRUE         | TRUE              |
| 1     | ERDISNVFP  | 452   | 460  | 9              | HLA-A*02:01 | 452           | 59             | ERDISNVFP   | ERDISNVFP   | 36164.93    | 59          | 3.62E+04     | 59          | TRUE         | TRUE              |
| 1     | SEVAVLYQD  | 592   | 600  | 9              | HLA-A*02:01 | 592           | 59             | SEVAVLYQD   | SEVAVLYQD   | 36175.09    | 59          | 3.62E+04     | 59          | TRUE         | TRUE              |
| 1     | LDISPCSGF  | 571   | 579  | 9              | HLA-A*02:01 | 571           | 59             | LDISPCSGF   | LDISPCSGF   | 36212.3     | 59          | 3.62E+04     | 59          | TRUE         | TRUE              |
| 1     | AKTSDVCNM  | 714   | 722  | 9              | HLA-A*02:01 | 714           | 59             | AKTSDVCNM   | AKTSDVCNM   | 36266.01    | 59          | 3.63E+04     | 59          | TRUE         | TRUE              |
| 1     | AKNLNESU   | 1172  | 1180 | 9              | HLA-A*02:01 | 1172          | 59             | AKNLNESU    | AKNLNESU    | 36267.97    | 59          | 3.63E+04     | 59          | TRUE         | TRUE              |
| 1     | APATVCGPK  | 506   | 514  | 9              | HLA-A*02:01 | 506           | 59             | APATVCGPK   | APATVCGPK   | 36336.34    | 59          | 3.63E+04     | 59          | TRUE         | TRUE              |
| 1     | SGDVRFRPN  | 310   | 318  | 9              | HLA-A*02:01 | 310           | 59             | SGDVRFRPN   | SGDVRFRPN   | 36353.63    | 59          | 3.64E+04     | 59          | TRUE         | TRUE              |
| 1     | TSQKSIVAY  | 669   | 677  | 9              | HLA-A*02:01 | 669           | 59             | TSQKSIVAY   | TSQKSIVAY   | 36366.22    | 59          | 3.64E+04     | 59          | TRUE         | TRUE              |
| 1     | DVVRFPNIT  | 312   | 320  | 9              | HLA-A*02:01 | 312           | 59             | DVVRFPNIT   | DVVRFPNIT   | 36407.15    | 59          | 3.64E+04     | 59          | TRUE         | TRUE              |
| 1     | KYFKNHTSP  | 1136  | 1144 | 9              | HLA-A*02:01 | 1136          | 59             | KYFKNHTSP   | KYFKNHTSP   | 36409.92    | 59          | 3.64E+04     | 59          | TRUE         | TRUE              |
| 1     | TKLNDLCFS  | 372   | 380  | 9              | HLA-A*02:01 | 372           | 59             | TKLNDLCFS   | TKLNDLCFS   | 36419.76    | 59          | 3.64E+04     | 59          | TRUE         | TRUE              |
| 1     | GYQPIDVVR  | 199   | 207  | 9              | HLA-A*02:01 | 199           | 60             | GYQPIDVVR   | GYQPIDVVR   | 36463.54    | 60          | 3.65E+04     | 60          | TRUE         | TRUE              |
| 1     | NFTTAPAC   | 1056  | 1064 | 9              | HLA-A*02:01 | 1056          | 60             | NFTTAPAC    | NFTTAPAC    | 36469.85    | 60          | 3.65E+04     | 60          | TRUE         | TRUE              |
| 1     | GYHLMSPQ   | 1028  | 1036 | 9              | HLA-A*02:01 | 1028          | 60             | GYHLMSPQ    | GYHLMSPQ    | 36495.52    | 60          | 3.65E+04     | 60          | TRUE         | TRUE              |
| 1     | IGIINTVY   | 1112  | 1120 | 9              | HLA-A*02:01 | 1112          | 60             | IGIINTVY    | IGIINTVY    | 36497.47    | 60          | 3.65E+04     | 60          | TRUE         | TRUE              |
| 1     | GNNVFTQQA  | 625   | 633  | 9              | HLA-A*02:01 | 625           | 60             | GNNVFTQQA   | GNNVFTQQA   | 36524.73    | 60          | 3.65E+04     | 60          | TRUE         | TRUE              |
| 1     | NIDATSTGN  | 427   | 435  | 9              | HLA-A*02:01 | 427           | 60             | NIDATSTGN   | NIDATSTGN   | 36525.14    | 60          | 3.65E+04     | 60          | TRUE         | TRUE              |
| 1     | VIINNSTN   | 114   | 122  | 9              | HLA-A*02:01 | 114           | 60             | VIINNSTN    | VIINNSTN    | 36552.4     | 60          | 3.66E+04     | 60          | TRUE         | TRUE              |
| 1     | DGKPCPTPA  | 463   | 471  | 9              | HLA-A*02:01 | 463           | 60             | DGKPCPTPA   | DGKPCPTPA   | 36561.9     | 60          | 3.66E+04     | 60          | TRUE         | TRUE              |
| 1     | LAELKCSVK  | 283   | 291  | 9              | HLA-A*02:01 | 283           | 60             | LAELKCSVK   | LAELKCSVK   | 36641.9     | 60          | 3.66E+04     | 60          | TRUE         | TRUE              |
| 1     | VPSGDVVRF  | 308   | 316  | 9              | HLA-A*02:01 | 308           | 60             | VPSGDVVRF   | VPSGDVVRF   | 36706.99    | 60          | 3.67E+04     | 60          | TRUE         | TRUE              |
| 1     | SFPQAAPHG  | 1033  | 1041 | 9              | HLA-A*02:01 | 1033          | 60             | SFPQAAPHG   | SFPQAAPHG   | 36712.93    | 60          | 3.67E+04     | 60          | TRUE         | TRUE              |
| 1     | AICHEGKAY  | 1062  | 1070 | 9              | HLA-A*02:01 | 1062          | 60             | AICHEGKAY   | AICHEGKAY   | 36715.72    | 60          | 3.67E+04     | 60          | TRUE         | TRUE              |
| 1     | IWGTSAAY   | 244   | 252  | 9              | HLA-A*02:01 | 244           | 61             | IWGTSAAY    | IWGTSAAY    | 36779.73    | 61          | 3.68E+04     | 61          | TRUE         | TRUE              |
| 1     | NGTSWFIITQ | 1080  | 1088 | 9              | HLA-A*02:01 | 1080          | 61             | NGTSWFIITQ  | NGTSWFIITQ  | 36785.71    | 61          | 3.68E+04     | 61          | TRUE         | TRUE              |
| 1     | GFLLVYKGY  | 192   | 200  | 9              | HLA-A*02:01 | 192           | 61             | GFLLVYKGY   | GFLLVYKGY   | 36833.5     | 61          | 3.68E+04     | 61          | TRUE         | TRUE              |
| 1     | GCYLAWNTR  | 418   | 426  | 9              | HLA-A*02:01 | 418           | 61             | GCYLAWNTR   | GCYLAWNTR   | 36834.69    | 61          | 3.68E+04     | 61          | TRUE         | TRUE              |
| 1     | VFGSTMNNK  | 102   | 110  | 9              | HLA-A*02:01 | 102           | 61             | VFGSTMNNK   | VFGSTMNNK   | 36853.43    | 61          | 3.69E+04     | 61          | TRUE         | TRUE              |
| 1     | DGFLVYKGY  | 191   | 199  | 9              | HLA-A*02:01 | 191           | 61             | DGFLVYKGY   | DGFLVYKGY   | 36879.75    | 61          | 3.69E+04     | 61          | TRUE         | TRUE              |
| 1     | PATVCGPKL  | 507   | 515  | 9              | HLA-A*02:01 | 507           | 61             | PATVCGPKL   | PATVCGPKL   | 36892.12    | 61          | 3.69E+04     | 61          | TRUE         | TRUE              |
| 1     | GDGGINAS   | 1149  | 1157 | 9              | HLA-A*02:01 | 1149          | 61             | GDGGINAS    | GDGGINAS    | 36909.28    | 61          | 3.69E+04     | 61          | TRUE         | TRUE              |
| 1     | NHTSPDVL   | 1140  | 1148 | 9              | HLA-A*02:01 | 1140          | 61             | NHTSPDVL    | NHTSPDVL    | 36948.05    | 61          | 3.69E+04     | 61          | TRUE         | TRUE              |
| 1     | HEGKAVFR   | 1065  | 1073 | 9              | HLA-A*02:01 | 1065          | 61             | HEGKAVFR    | HEGKAVFR    | 37005.26    | 61          | 3.70E+04     | 61          | TRUE         | TRUE              |
| 1     | NWHLRPPF   | 408   | 416  | 9              | HLA-A*02:01 | 408           | 62             | NWHLRPPF    | NWHLRPPF    | 37032.31    | 62          | 3.70E+04     | 62          | TRUE         | TRUE              |
| 1     | ITGIGYQYP  | 486   | 494  | 9              | HLA-A*02:01 | 486           | 62             | ITGIGYQYP   | ITGIGYQYP   | 37040.5     | 62          | 3.70E+04     | 62          | TRUE         | TRUE              |
| 1     | EHVDTSEYEC | 640   | 648  | 9              | HLA-A*02:01 | 640           | 62             | EHVDTSEYEC  | EHVDTSEYEC  | 37066.57    | 62          | 3.71E+04     | 62          | TRUE         | TRUE              |
| 1     | CGKGYHLM   | 1025  | 1033 | 9              | HLA-A*02:01 | 1025          | 62             | CGKGYHLM    | CGKGYHLM    | 37087.83    | 62          | 3.71E+04     | 62          | TRUE         | TRUE              |
| 1     | NYTQHTSSM  | 29    | 37   | 9              | HLA-A*02:01 | 29            | 62             | NYTQHTSSM   | NYTQHTSSM   | 37116.73    | 62          | 3.71E+04     | 62          | TRUE         | TRUE              |
| 1     | VSLLRSTSQ  | 663   | 671  | 9              | HLA-A*02:01 | 663           | 62             | VSLLRSTSQ   | VSLLRSTSQ   | 37138.84    | 62          | 3.71E+04     | 62          | TRUE         | TRUE              |
| 1     | DINARDLIC  | 825   | 833  | 9              | HLA-A*02:01 | 825           | 62             | DINARDLIC   | DINARDLIC   | 37165.36    | 62          | 3.72E+04     | 62          | TRUE         | TRUE              |
| 1     | PTNFSISIT  | 697   | 705  | 9              | HLA-A*02:01 | 697           | 62             | PTNFSISIT   | PTNFSISIT   | 37173.8     | 62          | 3.72E+04     | 62          | TRUE         | TRUE              |
| 1     | NYKLPDDFM  | 409   | 417  | 9              | HLA-A*02:01 | 409           | 62             | NYKLPDDFM   | NYKLPDDFM   | 37175.02    | 62          | 3.72E+04     | 62          | TRUE         | TRUE              |
| 1     | TKMSECVLG  | 1009  | 1017 | 9              | HLA-A*02:01 | 1009          | 62             | TKMSECVLG   | TKMSECVLG   | 37232.58    | 62          | 3.72E+04     | 62          | TRUE         | TRUE              |
| 1     | VRGWVFGST  | 98    | 106  | 9              | HLA-A*02:01 | 98            | 62             | VRGWVFGST   | VRGWVFGST   | 37249.51    | 62          | 3.72E+04     | 62          | TRUE         | TRUE              |
| 1     | PFRDISNV   | 450   | 458  | 9              | HLA-A*02:01 | 450           | 62             | PFRDISNV    | PFRDISNV    | 37256.77    | 62          | 3.73E+04     | 62          | TRUE         | TRUE              |
| 1     | PSQERNFTT  | 1051  | 1059 | 9              | HLA-A*02:01 | 1051          | 62             | PSQERNFTT   | PSQERNFTT   | 37257.15    | 62          | 3.73E+04     | 62          | TRUE         | TRUE              |
| 1     | QAQCLIGAE  | 632   | 640  | 9              | HLA-A*02:01 | 632           | 62             | QAQCLIGAE   | QAQCLIGAE   | 37267.24    | 62          | 3.73E+04     | 62          | TRUE         | TRUE              |
| 1     | WPLNDYGFY  | 476   | 484  | 9              | HLA-A*02:01 | 476           | 62             | WPLNDYGFY   | WPLNDYGFY   | 37281.36    | 62          | 3.73E+04     | 62          | TRUE         | TRUE              |
| 1     | ECANLLQY   | 730   | 738  | 9              | HLA-A*02:01 | 730           | 63             | ECANLLQY    | ECANLLQY    | 37297.9     | 63          | 3.73E+04     | 63          | TRUE         | TRUE              |
| 1     | FPNITNLCP  | 316   | 324  | 9              | HLA-A*02:01 | 316           | 63             | FPNITNLCP   | FPNITNLCP   | 37312.02    | 63          | 3.73E+04     | 63          | TRUE         | TRUE              |
| 1     | YKLPDDFMG  | 410   | 418  | 9              | HLA-A*02:01 | 410           | 63             | YKLPDDFMG   | YKLPDDFMG   | 37319.7     | 63          | 3.73E+04     | 63          | TRUE         | TRUE              |
| 1     | DLCAQKFN   | 830   | 838  | 9              | HLA-A*02:01 | 830           | 63             | DLCAQKFN    | DLCAQKFN    | 37374.64    | 63          | 3.74E+04     | 63          | TRUE         | TRUE              |
| 1     | VTGFHTINH  | 66    | 74   | 9              | HLA-A*02:01 | 66            | 63             | VTGFHTINH   | VTGFHTINH   | 37452.38    | 63          | 3.75E+04     | 63          | TRUE         | TRUE              |
| 1     | NFNFNGLTG  | 526   | 534  | 9              | HLA-A*02:01 | 526           | 63             | NFNFNGLTG   | NFNFNGLTG   | 37495.35    | 63          | 3.75E+04     | 63          | TRUE         | TRUE              |
| 1     | QSLQTVYTQ  | 984   | 992  | 9              | HLA-A*02:01 | 984           | 63             | QSLQTVYTQ   | QSLQTVYTQ   | 37496.97    | 63          | 3.75E+04     | 63          | TRUE         | TRUE              |
| 1     | DLQELGKYE  | 1181  | 1189 | 9              | HLA-A*02:01 | 1181          | 63             | DLQELGKYE   | DLQELGKYE   | 37519.29    | 63          | 3.75E+04     | 63          | TRUE         | TRUE              |
| 1     | GACSGSCC   | 1228  | 1236 | 9              | HLA-A*02:01 | 1228          | 63             | GACSGSCC    | GACSGSCC    | 37529.85    | 63          | 3.75E+04     | 63          | TRUE         | TRUE              |
| 1     | KPMGTQHT   | 142   | 150  | 9              | HLA-A*02:01 | 142           | 63             | KPMGTQHT    | KPMGTQHT    | 37551.37    | 63          | 3.76E+04     | 63          | TRUE         | TRUE              |
| 1     | NTEVSGNCD  | 1101  | 1109 | 9              | HLA-A*02:01 | 1101          | 64             | NTEVSGNCD   | NTEVSGNCD   | 37624.57    | 64          | 3.76E+04     | 64          | TRUE         | TRUE              |
| 1     | TQHTSSMRG  | 31    | 39   | 9              | HLA-A*02:01 | 31            | 64             | TQHTSSMRG   | TQHTSSMRG   | 37647.39    | 64          | 3.76E+04     | 64          | TRUE         | TRUE              |
| 1     | LVYKGYQYP  | 194   | 202  | 9              | HLA-A*02:0  |               |                |             |             |             |             |              |             |              |                   |

| seq # | peptide    | start | end  | peptide length | allele      | peptide index | median binding | netmhcpan_ba | netmhcpan_ba | netmhcpan_ba | netmhcpan_ba | legacy score | legacy rank | scores equal | percentiles equal |
|-------|------------|-------|------|----------------|-------------|---------------|----------------|--------------|--------------|--------------|--------------|--------------|-------------|--------------|-------------------|
| 1     | LRHGKLRPF  | 443   | 451  | 9              | HLA-A*02:01 | 443           | 67             | LRHGKLRPF    | LRHGKLRPF    | 38456.37     | 67           | 3.85E+04     | 67          | TRUE         | TRUE              |
| 1     | GVSA TKLND | 368   | 376  | 9              | HLA-A*02:01 | 368           | 67             | GVSA TKLND   | GVSA TKLND   | 38481.75     | 67           | 3.85E+04     | 67          | TRUE         | TRUE              |
| 1     | VEAEVQIDR  | 969   | 977  | 9              | HLA-A*02:01 | 969           | 67             | VEAEVQIDR    | VEAEVQIDR    | 38506.75     | 67           | 3.85E+04     | 67          | TRUE         | TRUE              |
| 1     | NVPFSPDGK  | 457   | 465  | 9              | HLA-A*02:01 | 457           | 67             | NVPFSPDGK    | NVPFSPDGK    | 38508.41     | 67           | 3.85E+04     | 67          | TRUE         | TRUE              |
| 1     | DAFSLDVSE  | 166   | 174  | 9              | HLA-A*02:01 | 166           | 67             | DAFSLDVSE    | DAFSLDVSE    | 38509.26     | 67           | 3.85E+04     | 67          | TRUE         | TRUE              |
| 1     | EAEEVQIDRL | 970   | 978  | 9              | HLA-A*02:01 | 970           | 67             | EAEEVQIDRL   | EAEEVQIDRL   | 38529.25     | 67           | 3.85E+04     | 67          | TRUE         | TRUE              |
| 1     | GKG YHLMFS | 1026  | 1034 | 9              | HLA-A*02:01 | 1026          | 67             | GKG YHLMFS   | GKG YHLMFS   | 38529.25     | 67           | 3.85E+04     | 67          | TRUE         | TRUE              |
| 1     | GAGICASYH  | 653   | 661  | 9              | HLA-A*02:01 | 653           | 67             | GAGICASYH    | GAGICASYH    | 38536.76     | 67           | 3.85E+04     | 67          | TRUE         | TRUE              |
| 1     | ADAGFMKQY  | 811   | 819  | 9              | HLA-A*02:01 | 811           | 67             | ADAGFMKQY    | ADAGFMKQY    | 38556.77     | 67           | 3.86E+04     | 67          | TRUE         | TRUE              |
| 1     | RDLCIAQKF  | 829   | 837  | 9              | HLA-A*02:01 | 829           | 67             | RDLCIAQKF    | RDLCIAQKF    | 38566.37     | 67           | 3.86E+04     | 67          | TRUE         | TRUE              |
| 1     | PQIITDNT   | 1094  | 1102 | 9              | HLA-A*02:01 | 1094          | 67             | PQIITDNT     | PQIITDNT     | 38575.13     | 67           | 3.86E+04     | 67          | TRUE         | TRUE              |
| 1     | YKYRYLRHG  | 438   | 446  | 9              | HLA-A*02:01 | 438           | 67             | YKYRYLRHG    | YKYRYLRHG    | 38581.82     | 67           | 3.86E+04     | 67          | TRUE         | TRUE              |
| 1     | PFAMQMAYR  | 879   | 887  | 9              | HLA-A*02:01 | 879           | 67             | PFAMQMAYR    | PFAMQMAYR    | 38583.91     | 67           | 3.86E+04     | 67          | TRUE         | TRUE              |
| 1     | LKPTKRSFI  | 792   | 800  | 9              | HLA-A*02:01 | 792           | 67             | LKPTKRSFI    | LKPTKRSFI    | 38609.38     | 67           | 3.86E+04     | 67          | TRUE         | TRUE              |
| 1     | FDDVQAPNY  | 22    | 30   | 9              | HLA-A*02:01 | 22            | 68             | FDDVQAPNY    | FDDVQAPNY    | 38667.06     | 68           | 3.87E+04     | 68          | TRUE         | TRUE              |
| 1     | SGINASVVN  | 1152  | 1160 | 9              | HLA-A*02:01 | 1152          | 68             | SGINASVVN    | SGINASVVN    | 38680.05     | 68           | 3.87E+04     | 68          | TRUE         | TRUE              |
| 1     | SPCSFGGVV  | 574   | 582  | 9              | HLA-A*02:01 | 574           | 68             | SPCSFGGVV    | SPCSFGGVV    | 38689.84     | 68           | 3.87E+04     | 68          | TRUE         | TRUE              |
| 1     | VSKPMGTGT  | 140   | 148  | 9              | HLA-A*02:01 | 140           | 68             | VSKPMGTGT    | VSKPMGTGT    | 38699.86     | 68           | 3.87E+04     | 68          | TRUE         | TRUE              |
| 1     | RNIDATSTG  | 426   | 434  | 9              | HLA-A*02:01 | 426           | 68             | RNIDATSTG    | RNIDATSTG    | 38741.19     | 68           | 3.87E+04     | 68          | TRUE         | TRUE              |
| 1     | GAEEVDTSY  | 638   | 646  | 9              | HLA-A*02:01 | 638           | 68             | GAEEVDTSY    | GAEEVDTSY    | 38751.26     | 68           | 3.88E+04     | 68          | TRUE         | TRUE              |
| 1     | SKFEELDKY  | 1129  | 1137 | 9              | HLA-A*02:01 | 1129          | 68             | SKFEELDKY    | SKFEELDKY    | 38776.84     | 68           | 3.88E+04     | 68          | TRUE         | TRUE              |
| 1     | MPVSMAKTS  | 709   | 717  | 9              | HLA-A*02:01 | 709           | 68             | MPVSMAKTS    | MPVSMAKTS    | 38783.14     | 68           | 3.88E+04     | 68          | TRUE         | TRUE              |
| 1     | VSEKSGNFK  | 172   | 180  | 9              | HLA-A*02:01 | 172           | 68             | VSEKSGNFK    | VSEKSGNFK    | 38799.5      | 68           | 3.88E+04     | 68          | TRUE         | TRUE              |
| 1     | EVQIDRLT   | 972   | 980  | 9              | HLA-A*02:01 | 972           | 69             | EVQIDRLT     | EVQIDRLT     | 38892.82     | 69           | 3.89E+04     | 69          | TRUE         | TRUE              |
| 1     | TQNVLYENQ  | 894   | 902  | 9              | HLA-A*02:01 | 894           | 69             | TQNVLYENQ    | TQNVLYENQ    | 38916.8      | 69           | 3.89E+04     | 69          | TRUE         | TRUE              |
| 1     | DIPIGAGIC  | 649   | 657  | 9              | HLA-A*02:01 | 649           | 69             | DIPIGAGIC    | DIPIGAGIC    | 38967.79     | 69           | 3.90E+04     | 69          | TRUE         | TRUE              |
| 1     | FERDISNVP  | 451   | 459  | 9              | HLA-A*02:01 | 451           | 69             | FERDISNVP    | FERDISNVP    | 39000.27     | 69           | 3.90E+04     | 69          | TRUE         | TRUE              |
| 1     | LRSTSQKSI  | 666   | 674  | 9              | HLA-A*02:01 | 666           | 69             | LRSTSQKSI    | LRSTSQKSI    | 39009.55     | 69           | 3.90E+04     | 69          | TRUE         | TRUE              |
| 1     | QTGVIADYN  | 401   | 409  | 9              | HLA-A*02:01 | 401           | 69             | QTGVIADYN    | QTGVIADYN    | 39030.66     | 69           | 3.90E+04     | 69          | TRUE         | TRUE              |
| 1     | NVTGFHTIN  | 65    | 73   | 9              | HLA-A*02:01 | 65            | 69             | NVTGFHTIN    | NVTGFHTIN    | 39036.15     | 69           | 3.90E+04     | 69          | TRUE         | TRUE              |
| 1     | LOELGKYEQ  | 1182  | 1190 | 9              | HLA-A*02:01 | 1182          | 69             | LOELGKYEQ    | LOELGKYEQ    | 39069.52     | 69           | 3.91E+04     | 69          | TRUE         | TRUE              |
| 1     | LNRLASGIA  | 745   | 753  | 9              | HLA-A*02:01 | 745           | 69             | LNRLASGIA    | LNRLASGIA    | 39072.07     | 69           | 3.91E+04     | 69          | TRUE         | TRUE              |
| 1     | TGVIADYNY  | 402   | 410  | 9              | HLA-A*02:01 | 402           | 69             | TGVIADYNY    | TGVIADYNY    | 39082.63     | 69           | 3.91E+04     | 69          | TRUE         | TRUE              |
| 1     | LYQDVNCTD  | 597   | 605  | 9              | HLA-A*02:01 | 597           | 69             | LYQDVNCTD    | LYQDVNCTD    | 39092.36     | 69           | 3.91E+04     | 69          | TRUE         | TRUE              |
| 1     | LPIGINITN  | 222   | 230  | 9              | HLA-A*02:01 | 222           | 69             | LPIGINITN    | LPIGINITN    | 39108.88     | 69           | 3.91E+04     | 69          | TRUE         | TRUE              |
| 1     | TSGSDLRDC  | 11    | 19   | 9              | HLA-A*02:01 | 11            | 69             | TSGSDLRDC    | TSGSDLRDC    | 39125.38     | 69           | 3.91E+04     | 69          | TRUE         | TRUE              |
| 1     | IDVVRDLPS  | 203   | 211  | 9              | HLA-A*02:01 | 203           | 70             | IDVVRDLPS    | IDVVRDLPS    | 39167.73     | 70           | 3.92E+04     | 70          | TRUE         | TRUE              |
| 1     | NPPFAVSKP  | 135   | 143  | 9              | HLA-A*02:01 | 135           | 70             | NPPFAVSKP    | NPPFAVSKP    | 39199.1      | 70           | 3.92E+04     | 70          | TRUE         | TRUE              |
| 1     | VDCSQNPLA  | 276   | 284  | 9              | HLA-A*02:01 | 276           | 70             | VDCSQNPLA    | VDCSQNPLA    | 39222.44     | 70           | 3.92E+04     | 70          | TRUE         | TRUE              |
| 1     | TGNVNYKYR  | 433   | 441  | 9              | HLA-A*02:01 | 433           | 70             | TGNVNYKYR    | TGNVNYKYR    | 39260.22     | 70           | 3.93E+04     | 70          | TRUE         | TRUE              |
| 1     | VSTAIHADQ  | 606   | 614  | 9              | HLA-A*02:01 | 606           | 70             | VSTAIHADQ    | VSTAIHADQ    | 39304.86     | 70           | 3.93E+04     | 70          | TRUE         | TRUE              |
| 1     | SSKRFQPFQ  | 541   | 549  | 9              | HLA-A*02:01 | 541           | 70             | SSKRFQPFQ    | SSKRFQPFQ    | 39307.39     | 70           | 3.93E+04     | 70          | TRUE         | TRUE              |
| 1     | STALGKLQD  | 924   | 932  | 9              | HLA-A*02:01 | 924           | 70             | STALGKLQD    | STALGKLQD    | 39352.08     | 70           | 3.94E+04     | 70          | TRUE         | TRUE              |
| 1     | PGTNASSEV  | 586   | 594  | 9              | HLA-A*02:01 | 586           | 71             | PGTNASSEV    | PGTNASSEV    | 39395.53     | 71           | 3.94E+04     | 71          | TRUE         | TRUE              |
| 1     | VAVLYQDVN  | 594   | 602  | 9              | HLA-A*02:01 | 594           | 71             | VAVLYQDVN    | VAVLYQDVN    | 39439.02     | 71           | 3.94E+04     | 71          | TRUE         | TRUE              |
| 1     | RYRLHGKLR  | 441   | 449  | 9              | HLA-A*02:01 | 441           | 71             | RYRLHGKLR    | RYRLHGKLR    | 39448.84     | 71           | 3.94E+04     | 71          | TRUE         | TRUE              |
| 1     | CCSCLKGAC  | 1222  | 1230 | 9              | HLA-A*02:01 | 1222          | 71             | CCSCLKGAC    | CCSCLKGAC    | 39450.98     | 71           | 3.95E+04     | 71          | TRUE         | TRUE              |
| 1     | TFGAGAAALQ | 869   | 877  | 9              | HLA-A*02:01 | 869           | 71             | TFGAGAAALQ   | TFGAGAAALQ   | 39462.94     | 71           | 3.95E+04     | 71          | TRUE         | TRUE              |
| 1     | PIDVVRDLP  | 202   | 210  | 9              | HLA-A*02:01 | 202           | 71             | PIDVVRDLP    | PIDVVRDLP    | 39511.22     | 71           | 3.95E+04     | 71          | TRUE         | TRUE              |
| 1     | NDLCFSNVY  | 375   | 383  | 9              | HLA-A*02:01 | 375           | 71             | NDLCFSNVY    | NDLCFSNVY    | 39519.35     | 71           | 3.95E+04     | 71          | TRUE         | TRUE              |
| 1     | LHVTYVPSQ  | 1045  | 1053 | 9              | HLA-A*02:01 | 1045          | 71             | LHVTYVPSQ    | LHVTYVPSQ    | 39556.99     | 71           | 3.96E+04     | 71          | TRUE         | TRUE              |
| 1     | SGNCDVVG   | 1105  | 1113 | 9              | HLA-A*02:01 | 1105          | 71             | SGNCDVVG     | SGNCDVVG     | 39562.12     | 71           | 3.96E+04     | 71          | TRUE         | TRUE              |
| 1     | AEKCSVKIS  | 284   | 292  | 9              | HLA-A*02:01 | 284           | 71             | AEKCSVKIS    | AEKCSVKIS    | 39578.4      | 71           | 3.96E+04     | 71          | TRUE         | TRUE              |
| 1     | LCNCWPLND  | 472   | 480  | 9              | HLA-A*02:01 | 472           | 72             | LCNCWPLND    | LCNCWPLND    | 39609.68     | 72           | 3.96E+04     | 72          | TRUE         | TRUE              |
| 1     | ASVNVIOKE  | 1156  | 1164 | 9              | HLA-A*02:01 | 1156          | 72             | ASVNVIOKE    | ASVNVIOKE    | 39668.86     | 72           | 3.97E+04     | 72          | TRUE         | TRUE              |
| 1     | AGCLJGAEH  | 633   | 641  | 9              | HLA-A*02:01 | 633           | 72             | AGCLJGAEH    | AGCLJGAEH    | 39682.6      | 72           | 3.97E+04     | 72          | TRUE         | TRUE              |
| 1     | TGVLTPSSK  | 535   | 543  | 9              | HLA-A*02:01 | 535           | 72             | TGVLTPSSK    | TGVLTPSSK    | 39687.31     | 72           | 3.97E+04     | 72          | TRUE         | TRUE              |
| 1     | TECANLUQL  | 728   | 737  | 9              | HLA-A*02:01 | 728           | 72             | TECANLUQL    | TECANLUQL    | 39752.96     | 72           | 3.98E+04     | 72          | TRUE         | TRUE              |
| 1     | WFKNHTSPD  | 1137  | 1145 | 9              | HLA-A*02:01 | 1137          | 72             | WFKNHTSPD    | WFKNHTSPD    | 39776.73     | 72           | 3.98E+04     | 72          | TRUE         | TRUE              |
| 1     | WERKISNC   | 340   | 348  | 9              | HLA-A*02:01 | 340           | 72             | WERKISNC     | WERKISNC     | 39818.08     | 72           | 3.98E+04     | 72          | TRUE         | TRUE              |
| 1     | LNAPATVCG  | 504   | 512  | 9              | HLA-A*02:01 | 504           | 73             | LNAPATVCG    | LNAPATVCG    | 39873.25     | 73           | 3.99E+04     | 73          | TRUE         | TRUE              |
| 1     | DVSTAIHAD  | 605   | 613  | 9              | HLA-A*02:01 | 605           | 73             | DVSTAIHAD    | DVSTAIHAD    | 39932.39     | 73           | 3.99E+04     | 73          | TRUE         | TRUE              |
| 1     | FHTNHTFG   | 69    | 77   | 9              | HLA-A*02:01 | 69            | 73             | FHTNHTFG     | FHTNHTFG     | 39936.28     | 73           | 3.99E+04     | 73          | TRUE         | TRUE              |
| 1     | LGKYEQIKY  | 1185  | 1193 | 9              | HLA-A*02:01 | 1185          | 73             | LGKYEQIKY    | LGKYEQIKY    | 39958.33     | 73           | 4.00E+04     | 73          | TRUE         | TRUE              |
| 1     | DRCTTFDDV  | 17    | 25   | 9              | HLA-A*02:01 | 17            | 73             | DRCTTFDDV    | DRCTTFDDV    | 39983.85     | 73           | 4.00E+04     | 73          | TRUE         | TRUE              |
| 1     | TSEILDSP   | 567   | 575  | 9              | HLA-A*02:01 | 567           | 73             | TSEILDSP     | TSEILDSP     | 39991.64     | 73           | 4.00E+04     | 73          | TRUE         | TRUE              |
| 1     | TGRLQSLQ   | 980   | 988  | 9              | HLA-A*02:01 | 980           | 73             | TGRLQSLQ     | TGRLQSLQ     | 40015.86     | 73           | 4.00E+04     | 73          | TRUE         | TRUE              |
| 1     | SECVLGOSK  | 1012  | 1020 | 9              | HLA-A*02:01 | 1012          | 73             | SECVLGOSK    | SECVLGOSK    | 40026.27     | 73           | 4.00E+04     | 73          | TRUE         | TRUE              |
| 1     | APHGVVFLH  | 1038  | 1046 | 9              | HLA-A*02:01 | 1038          | 73             | APHGVVFLH    | APHGVVFLH    | 40026.7      | 73           | 4.00E+04     | 73          | TRUE         | TRUE              |
| 1     | TSPDVLGD   | 1142  | 1150 | 9              | HLA-A*02:01 | 1142          | 73             | TSPDVLGD     | TSPDVLGD     | 40040.57     | 73           | 4.00E+04     | 73          | TRUE         | TRUE              |
| 1     | TFMLKYDEN  | 261   | 269  | 9              | HLA-A*02:01 | 261           | 73             | TFMLKYDEN    | TFMLKYDEN    | 40047.05     | 73           | 4.00E+04     | 73          | TRUE         | TRUE              |
| 1     | VYVAWERKKI | 337   | 345  | 9              | HLA-A*02:01 | 337           | 74             | VYVAWERKKI   | VYVAWERKKI   | 40119.48     | 74           | 4.01E+04     | 74          | TRUE         | TRUE              |
| 1     | SVRDPKTSE  | 561   | 569  | 9              | HLA-A*02:01 | 561           | 74             | SVRDPKTSE    | SVRDPKTSE    | 40122.09     | 74           | 4.01E+04     | 74          | TRUE         | TRUE              |
| 1     | VKGDDVRQI  | 389   | 397  | 9              | HLA-A*02:01 | 389           | 74             | VKGDDVRQI    | VKGDDVRQI    | 40134.26     | 74           | 4.01E+04     | 74          | TRUE         | TRUE              |
| 1     | DKVEAEVQI  | 967   | 975  | 9              | HLA-A*02:01 | 967           | 74             | DKVEAEVQI    | DKVEAEVQI    | 40155.1      | 74           | 4.02E+04     | 74          | TRUE         | TRUE              |
| 1     | HVDTSYECD  | 641   | 649  | 9              | HLA-A*02:01 | 641           | 74             | HVDTSYECD    | HVDTSYECD    | 40156.83     | 74           | 4.02E+04     | 74          | TRUE         | TRUE              |
| 1     | ACSCGSCCK  | 1229  | 1237 | 9              | HLA-A*02:01 | 1229          | 74             | ACSCGSCCK    | ACSCGSCCK    | 40197.25     | 74           | 4.02E+04     | 74          | TRUE         | TRUE              |
| 1     | DNPPFAVSK  | 134   | 142  | 9              | HLA-A*02:01 | 134           | 74             | DNPPFAVSK    | DNPPFAVSK    | 40205.96     | 74           | 4.02E+04     | 74          | TRUE         | TRUE              |
| 1     | PPALNCVWP  | 469   | 477  | 9              | HLA-A*02:01 | 469           | 74             | PPALNCVWP    | PPALNCVWP    | 40259.49     | 74           | 4.03E+04     | 74          | TRUE         | TRUE              |
| 1     | QESLTTTST  | 917   | 925  | 9              | HLA-A*02:01 | 917           | 74             | QESLTTTST    | QESLTTTST    | 40269.52     | 74           | 4.03E+04     | 74          | TRUE         | TRUE              |
| 1     | DLGDISGIN  | 1147  | 1155 | 9              | HLA-A*02:01 | 1147          | 74             | DLGDISGIN    | DLGDISGIN    | 40309.63     | 74           | 4.03E+04     | 74          | TRUE         | TRUE              |
| 1     | HGKLRPFER  | 445   | 453  | 9              | HLA-A*02:01 | 445           | 75             | HGKLRPFER    | HGKLRPFER    | 40336.24     | 75           | 4.03E+04     | 75          | TRUE         | TRUE              |
| 1     | VLGOSKRRD  | 1015  | 1023 | 9              | HLA-A*02:01 | 1015          | 75             | VLGOSKRRD    | VLGOSKRRD    | 40354.58     | 75           | 4.04E+04     | 75          | TRUE         | TRUE              |
| 1     | TGNNVFQTQ  | 624   | 632  | 9              | HLA-A*02:01 | 624           | 75             | TGNNVFQTQ    | TGNNVFQTQ    | 40366.81     | 75           | 4.04E+04     | 75          | TRUE         | TRUE              |
| 1     | PSSKRFQPF  | 540   | 548  | 9              | HLA-A*02:01 | 540           | 75             | PSSKRFQPF    | PSSKRFQPF    | 40393.9      | 75           | 4.04E+04     |             |              |                   |

| seq # | peptide    | start | end  | peptide length | allele      | peptide index | median binding | netmhcan.ba | netmhcan.ba | netmhcan.ba | netmhcan.ba | legacy score | legacy rank | scores equal | percentiles equal |
|-------|------------|-------|------|----------------|-------------|---------------|----------------|-------------|-------------|-------------|-------------|--------------|-------------|--------------|-------------------|
| 1     | DVQAPNYTQ  | 24    | 32   | 9              | HLA-A*02:01 | 24            | 78             | DVQAPNYTQ   | DVQAPNYTQ   | 41220.4     | 78          | 4.12E+04     | 78          | TRUE         | TRUE              |
| 1     | DTSYECDIP  | 643   | 651  | 9              | HLA-A*02:01 | 643           | 78             | DTSYECDIP   | DTSYECDIP   | 41239.57    | 78          | 4.12E+04     | 78          | TRUE         | TRUE              |
| 1     | SRLDKVEAE  | 964   | 972  | 9              | HLA-A*02:01 | 964           | 78             | SRLDKVEAE   | SRLDKVEAE   | 41240.93    | 78          | 4.12E+04     | 78          | TRUE         | TRUE              |
| 1     | DVVGIIINN  | 1109  | 1117 | 9              | HLA-A*02:01 | 1109          | 78             | DVVGIIINN   | DVVGIIINN   | 41249.39    | 78          | 4.12E+04     | 78          | TRUE         | TRUE              |
| 1     | PLPKTKRSF  | 791   | 799  | 9              | HLA-A*02:01 | 791           | 78             | PLPKTKRSF   | PLPKTKRSF   | 41258.78    | 78          | 4.13E+04     | 78          | TRUE         | TRUE              |
| 1     | TREVFQVKK  | 760   | 768  | 9              | HLA-A*02:01 | 760           | 78             | TREVFQVKK   | TREVFQVKK   | 41282.44    | 78          | 4.13E+04     | 78          | TRUE         | TRUE              |
| 1     | PAICHEGKA  | 1061  | 1069 | 9              | HLA-A*02:01 | 1061          | 79             | PAICHEGKA   | PAICHEGKA   | 41345.03    | 79          | 4.13E+04     | 79          | TRUE         | TRUE              |
| 1     | PSVYAWERK  | 335   | 343  | 9              | HLA-A*02:01 | 335           | 79             | PSVYAWERK   | PSVYAWERK   | 41347.7     | 79          | 4.13E+04     | 79          | TRUE         | TRUE              |
| 1     | KYRRLRHGK  | 439   | 447  | 9              | HLA-A*02:01 | 439           | 79             | KYRRLRHGK   | KYRRLRHGK   | 41364.26    | 79          | 4.14E+04     | 79          | TRUE         | TRUE              |
| 1     | QVKQMYKTP  | 766   | 774  | 9              | HLA-A*02:01 | 766           | 79             | QVKQMYKTP   | QVKQMYKTP   | 41364.71    | 79          | 4.14E+04     | 79          | TRUE         | TRUE              |
| 1     | SYECDPIPIG | 645   | 653  | 9              | HLA-A*02:01 | 645           | 79             | SYECDPIPIG  | SYECDPIPIG  | 41400.07    | 79          | 4.14E+04     | 79          | TRUE         | TRUE              |
| 1     | APNYTQHTS  | 27    | 35   | 9              | HLA-A*02:01 | 27            | 79             | APNYTQHTS   | APNYTQHTS   | 41431.46    | 79          | 4.14E+04     | 79          | TRUE         | TRUE              |
| 1     | IQKEIDRLN  | 1161  | 1169 | 9              | HLA-A*02:01 | 1161          | 79             | IQKEIDRLN   | IQKEIDRLN   | 41432.34    | 79          | 4.14E+04     | 79          | TRUE         | TRUE              |
| 1     | LSGIAAEQD  | 749   | 757  | 9              | HLA-A*02:01 | 749           | 79             | LSGIAAEQD   | LSGIAAEQD   | 41467.79    | 79          | 4.15E+04     | 79          | TRUE         | TRUE              |
| 1     | SKRVDFCGK  | 1019  | 1027 | 9              | HLA-A*02:01 | 1019          | 79             | SKRVDFCGK   | SKRVDFCGK   | 41501.44    | 79          | 4.15E+04     | 79          | TRUE         | TRUE              |
| 1     | MKQYGECLG  | 816   | 824  | 9              | HLA-A*02:01 | 816           | 79             | MKQYGECLG   | MKQYGECLG   | 41505.48    | 79          | 4.15E+04     | 79          | TRUE         | TRUE              |
| 1     | ECGIDINAR  | 821   | 829  | 9              | HLA-A*02:01 | 821           | 79             | ECGIDINAR   | ECGIDINAR   | 41520.31    | 79          | 4.15E+04     | 79          | TRUE         | TRUE              |
| 1     | SGSOLDRCT  | 12    | 20   | 9              | HLA-A*02:01 | 12            | 79             | SGSOLDRCT   | SGSOLDRCT   | 41523.45    | 79          | 4.15E+04     | 79          | TRUE         | TRUE              |
| 1     | YFAATEKSN  | 88    | 96   | 9              | HLA-A*02:01 | 88            | 80             | YFAATEKSN   | YFAATEKSN   | 41576.05    | 80          | 4.16E+04     | 80          | TRUE         | TRUE              |
| 1     | VSVITPGTN  | 581   | 589  | 9              | HLA-A*02:01 | 581           | 80             | VSVITPGTN   | VSVITPGTN   | 41585.03    | 80          | 4.16E+04     | 80          | TRUE         | TRUE              |
| 1     | NVLVENQKQ  | 896   | 904  | 9              | HLA-A*02:01 | 896           | 80             | NVLVENQKQ   | NVLVENQKQ   | 41664.76    | 80          | 4.17E+04     | 80          | TRUE         | TRUE              |
| 1     | VDFGKGYYH  | 1022  | 1030 | 9              | HLA-A*02:01 | 1022          | 80             | VDFGKGYYH   | VDFGKGYYH   | 41686.85    | 80          | 4.17E+04     | 80          | TRUE         | TRUE              |
| 1     | QSKRVDFCG  | 1018  | 1026 | 9              | HLA-A*02:01 | 1018          | 80             | QSKRVDFCG   | QSKRVDFCG   | 41722.06    | 80          | 4.17E+04     | 80          | TRUE         | TRUE              |
| 1     | RNTRVFAAQ  | 758   | 766  | 9              | HLA-A*02:01 | 758           | 81             | RNTRVFAAQ   | RNTRVFAAQ   | 41754.11    | 81          | 4.18E+04     | 81          | TRUE         | TRUE              |
| 1     | MAKTSVDCN  | 713   | 721  | 9              | HLA-A*02:01 | 713           | 81             | MAKTSVDCN   | MAKTSVDCN   | 41764.97    | 81          | 4.18E+04     | 81          | TRUE         | TRUE              |
| 1     | KKISNCVAD  | 343   | 351  | 9              | HLA-A*02:01 | 343           | 81             | KKISNCVAD   | KKISNCVAD   | 41786.2     | 81          | 4.18E+04     | 81          | TRUE         | TRUE              |
| 1     | ANLAATKMS  | 1004  | 1012 | 9              | HLA-A*02:01 | 1004          | 81             | ANLAATKMS   | ANLAATKMS   | 41791.62    | 81          | 4.18E+04     | 81          | TRUE         | TRUE              |
| 1     | IDATSTGNY  | 428   | 436  | 9              | HLA-A*02:01 | 428           | 81             | IDATSTGNY   | IDATSTGNY   | 41810.62    | 81          | 4.18E+04     | 81          | TRUE         | TRUE              |
| 1     | SGNFKHLRE  | 176   | 184  | 9              | HLA-A*02:01 | 176           | 81             | SGNFKHLRE   | SGNFKHLRE   | 41859.05    | 81          | 4.19E+04     | 81          | TRUE         | TRUE              |
| 1     | LTPFSKRFQ  | 538   | 546  | 9              | HLA-A*02:01 | 538           | 81             | LTPFSKRFQ   | LTPFSKRFQ   | 41873.55    | 81          | 4.19E+04     | 81          | TRUE         | TRUE              |
| 1     | KRVDFCGKG  | 1020  | 1028 | 9              | HLA-A*02:01 | 1020          | 81             | KRVDFCGKG   | KRVDFCGKG   | 41940.65    | 81          | 4.19E+04     | 81          | TRUE         | TRUE              |
| 1     | AYTMSLGAD  | 676   | 684  | 9              | HLA-A*02:01 | 676           | 82             | AYTMSLGAD   | AYTMSLGAD   | 42014.7     | 82          | 4.20E+04     | 82          | TRUE         | TRUE              |
| 1     | IDRLNEVAK  | 1165  | 1173 | 9              | HLA-A*02:01 | 1165          | 82             | IDRLNEVAK   | IDRLNEVAK   | 42070.2     | 82          | 4.21E+04     | 82          | TRUE         | TRUE              |
| 1     | VKQMYKTP   | 767   | 775  | 9              | HLA-A*02:01 | 767           | 82             | VKQMYKTP    | VKQMYKTP    | 42080.21    | 82          | 4.21E+04     | 82          | TRUE         | TRUE              |
| 1     | IDQLGELGY  | 1180  | 1188 | 9              | HLA-A*02:01 | 1180          | 82             | IDQLGELGY   | IDQLGELGY   | 42131.7     | 82          | 4.21E+04     | 82          | TRUE         | TRUE              |
| 1     | PVLKGVKLH  | 1245  | 1253 | 9              | HLA-A*02:01 | 1245          | 82             | PVLKGVKLH   | PVLKGVKLH   | 42167.25    | 82          | 4.22E+04     | 82          | TRUE         | TRUE              |
| 1     | LGQSKRVDF  | 1016  | 1024 | 9              | HLA-A*02:01 | 1016          | 82             | LGQSKRVDF   | LGQSKRVDF   | 42173.18    | 82          | 4.22E+04     | 82          | TRUE         | TRUE              |
| 1     | VVVGDDVRQ  | 388   | 396  | 9              | HLA-A*02:01 | 388           | 82             | VVVGDDVRQ   | VVVGDDVRQ   | 42178.21    | 82          | 4.22E+04     | 82          | TRUE         | TRUE              |
| 1     | CGDSTECAN  | 725   | 733  | 9              | HLA-A*02:01 | 725           | 83             | CGDSTECAN   | CGDSTECAN   | 42227.06    | 83          | 4.22E+04     | 83          | TRUE         | TRUE              |
| 1     | APAICHEGK  | 1060  | 1068 | 9              | HLA-A*02:01 | 1060          | 83             | APAICHEGK   | APAICHEGK   | 42249.92    | 83          | 4.22E+04     | 83          | TRUE         | TRUE              |
| 1     | NNSTNVVIR  | 118   | 126  | 9              | HLA-A*02:01 | 118           | 83             | NNSTNVVIR   | NNSTNVVIR   | 42272.32    | 83          | 4.23E+04     | 83          | TRUE         | TRUE              |
| 1     | QERNFTTAP  | 1053  | 1061 | 9              | HLA-A*02:01 | 1053          | 83             | QERNFTTAP   | QERNFTTAP   | 42280.55    | 83          | 4.23E+04     | 83          | TRUE         | TRUE              |
| 1     | SGIAAEQDR  | 750   | 758  | 9              | HLA-A*02:01 | 750           | 83             | SGIAAEQDR   | SGIAAEQDR   | 42286.96    | 83          | 4.23E+04     | 83          | TRUE         | TRUE              |
| 1     | ADSIAYSIN  | 683   | 691  | 9              | HLA-A*02:01 | 683           | 83             | ADSIAYSIN   | ADSIAYSIN   | 42317.63    | 83          | 4.23E+04     | 83          | TRUE         | TRUE              |
| 1     | DNAFNCTFE  | 154   | 162  | 9              | HLA-A*02:01 | 154           | 83             | DNAFNCTFE   | DNAFNCTFE   | 42318.09    | 83          | 4.23E+04     | 83          | TRUE         | TRUE              |
| 1     | GWVFGSTMN  | 100   | 108  | 9              | HLA-A*02:01 | 100           | 83             | GWVFGSTMN   | GWVFGSTMN   | 42321.75    | 83          | 4.23E+04     | 83          | TRUE         | TRUE              |
| 1     | VDCNMVYCG  | 718   | 726  | 9              | HLA-A*02:01 | 718           | 83             | VDCNMVYCG   | VDCNMVYCG   | 42336.41    | 83          | 4.23E+04     | 83          | TRUE         | TRUE              |
| 1     | DSFKEELDK  | 1128  | 1136 | 9              | HLA-A*02:01 | 1128          | 83             | DSFKEELDK   | DSFKEELDK   | 42343.26    | 83          | 4.23E+04     | 83          | TRUE         | TRUE              |
| 1     | KYEQIKWKP  | 1187  | 1195 | 9              | HLA-A*02:01 | 1187          | 83             | KYEQIKWKP   | KYEQIKWKP   | 42373.97    | 83          | 4.24E+04     | 83          | TRUE         | TRUE              |
| 1     | IFKPLGIN   | 219   | 227  | 9              | HLA-A*02:01 | 219           | 83             | IFKPLGIN    | IFKPLGIN    | 42395.54    | 83          | 4.24E+04     | 83          | TRUE         | TRUE              |
| 1     | QNVLYENQK  | 895   | 903  | 9              | HLA-A*02:01 | 895           | 83             | QNVLYENQK   | QNVLYENQK   | 42428.57    | 83          | 4.24E+04     | 83          | TRUE         | TRUE              |
| 1     | YGELGGIN   | 819   | 827  | 9              | HLA-A*02:01 | 819           | 83             | YGELGGIN    | YGELGGIN    | 42433.17    | 83          | 4.24E+04     | 83          | TRUE         | TRUE              |
| 1     | RKKSINQVA  | 342   | 350  | 9              | HLA-A*02:01 | 342           | 83             | RKKSINQVA   | RKKSINQVA   | 42437.77    | 83          | 4.24E+04     | 83          | TRUE         | TRUE              |
| 1     | SNVPFSPDG  | 456   | 464  | 9              | HLA-A*02:01 | 456           | 84             | SNVPFSPDG   | SNVPFSPDG   | 42453.84    | 84          | 4.25E+04     | 84          | TRUE         | TRUE              |
| 1     | PCTPPALNC  | 466   | 474  | 9              | HLA-A*02:01 | 466           | 84             | PCTPPALNC   | PCTPPALNC   | 42461.18    | 84          | 4.25E+04     | 84          | TRUE         | TRUE              |
| 1     | CGSCXCFDE  | 1232  | 1240 | 9              | HLA-A*02:01 | 1232          | 84             | CGSCXCFDE   | CGSCXCFDE   | 42500.24    | 84          | 4.25E+04     | 84          | TRUE         | TRUE              |
| 1     | ERKWSINQV  | 341   | 349  | 9              | HLA-A*02:01 | 341           | 84             | ERKWSINQV   | ERKWSINQV   | 42527.85    | 84          | 4.25E+04     | 84          | TRUE         | TRUE              |
| 1     | QNPALAEKC  | 280   | 288  | 9              | HLA-A*02:01 | 280           | 84             | QNPALAEKC   | QNPALAEKC   | 42536.6     | 84          | 4.25E+04     | 84          | TRUE         | TRUE              |
| 1     | EKSGNFKHL  | 174   | 182  | 9              | HLA-A*02:01 | 174           | 84             | EKSGNFKHL   | EKSGNFKHL   | 42592.71    | 84          | 4.26E+04     | 84          | TRUE         | TRUE              |
| 1     | REFVFNKND  | 183   | 191  | 9              | HLA-A*02:01 | 183           | 84             | REFVFNKND   | REFVFNKND   | 42561       | 84          | 4.26E+04     | 84          | TRUE         | TRUE              |
| 1     | ITSLGKLQ   | 923   | 931  | 9              | HLA-A*02:01 | 923           | 84             | ITSLGKLQ    | ITSLGKLQ    | 42651.81    | 84          | 4.27E+04     | 84          | TRUE         | TRUE              |
| 1     | LKGACSCGS  | 1226  | 1234 | 9              | HLA-A*02:01 | 1226          | 84             | LKGACSCGS   | LKGACSCGS   | 42661.02    | 84          | 4.27E+04     | 84          | TRUE         | TRUE              |
| 1     | LNDSLRLD   | 959   | 967  | 9              | HLA-A*02:01 | 959           | 84             | LNDSLRLD    | LNDSLRLD    | 42669.34    | 84          | 4.27E+04     | 84          | TRUE         | TRUE              |
| 1     | SFEIDKGIY  | 292   | 300  | 9              | HLA-A*02:01 | 292           | 85             | SFEIDKGIY   | SFEIDKGIY   | 42727.55    | 85          | 4.27E+04     | 85          | TRUE         | TRUE              |
| 1     | PTTFMLKYD  | 259   | 267  | 9              | HLA-A*02:01 | 259           | 85             | PTTFMLKYD   | PTTFMLKYD   | 42753.46    | 85          | 4.28E+04     | 85          | TRUE         | TRUE              |
| 1     | KNLINESUD  | 1173  | 1181 | 9              | HLA-A*02:01 | 1173          | 85             | KNLINESUD   | KNLINESUD   | 42767.8     | 85          | 4.28E+04     | 85          | TRUE         | TRUE              |
| 1     | PSGDVVRFP  | 309   | 317  | 9              | HLA-A*02:01 | 309           | 85             | PSGDVVRFP   | PSGDVVRFP   | 42801.6     | 85          | 4.28E+04     | 85          | TRUE         | TRUE              |
| 1     | AAEQDRNTR  | 753   | 761  | 9              | HLA-A*02:01 | 753           | 85             | AAEQDRNTR   | AAEQDRNTR   | 42871.57    | 85          | 4.29E+04     | 85          | TRUE         | TRUE              |
| 1     | MRGVYYPDE  | 37    | 45   | 9              | HLA-A*02:01 | 37            | 85             | MRGVYYPDE   | MRGVYYPDE   | 42877.13    | 85          | 4.29E+04     | 85          | TRUE         | TRUE              |
| 1     | LYENQKQIA  | 898   | 906  | 9              | HLA-A*02:01 | 898           | 86             | LYENQKQIA   | LYENQKQIA   | 42935.18    | 86          | 4.29E+04     | 86          | TRUE         | TRUE              |
| 1     | DYGFYTTTG  | 480   | 488  | 9              | HLA-A*02:01 | 480           | 86             | DYGFYTTTG   | DYGFYTTTG   | 42942.13    | 86          | 4.29E+04     | 86          | TRUE         | TRUE              |
| 1     | VVPSPDGKP  | 458   | 466  | 9              | HLA-A*02:01 | 458           | 86             | VVPSPDGKP   | VVPSPDGKP   | 42948.64    | 86          | 4.29E+04     | 86          | TRUE         | TRUE              |
| 1     | NCTFEYISD  | 158   | 166  | 9              | HLA-A*02:01 | 158           | 86             | NCTFEYISD   | NCTFEYISD   | 42956.54    | 86          | 4.30E+04     | 86          | TRUE         | TRUE              |
| 1     | RHGKLRPFE  | 444   | 452  | 9              | HLA-A*02:01 | 444           | 86             | RHGKLRPFE   | RHGKLRPFE   | 42971.42    | 86          | 4.30E+04     | 86          | TRUE         | TRUE              |
| 1     | DAVDCSQNP  | 274   | 282  | 9              | HLA-A*02:01 | 274           | 86             | DAVDCSQNP   | DAVDCSQNP   | 42981.2     | 86          | 4.30E+04     | 86          | TRUE         | TRUE              |
| 1     | SPDGKPCPT  | 461   | 469  | 9              | HLA-A*02:01 | 461           | 86             | SPDGKPCPT   | SPDGKPCPT   | 42986.3     | 86          | 4.30E+04     | 86          | TRUE         | TRUE              |
| 1     | LKCSVKSF   | 286   | 294  | 9              | HLA-A*02:01 | 286           | 86             | LKCSVKSF    | LKCSVKSF    | 43050.53    | 86          | 4.31E+04     | 86          | TRUE         | TRUE              |
| 1     | GIAAEQDRN  | 751   | 759  | 9              | HLA-A*02:01 | 751           | 86             | GIAAEQDRN   | GIAAEQDRN   | 43113.93    | 86          | 4.31E+04     | 86          | TRUE         | TRUE              |
| 1     | KPTKRSFIE  | 793   | 801  | 9              | HLA-A*02:01 | 793           | 86             | KPTKRSFIE   | KPTKRSFIE   | 43140.52    | 86          | 4.31E+04     | 86          | TRUE         | TRUE              |
| 1     | FNKAISQIQ  | 909   | 917  | 9              | HLA-A*02:01 | 909           | 87             | FNKAISQIQ   | FNKAISQIQ   | 43183.5     | 87          | 4.32E+04     | 87          | TRUE         | TRUE              |
| 1     | SDTLYLTQD  | 49    | 57   | 9              | HLA-A*02:01 | 49            | 87             | SDTLYLTQD   | SDTLYLTQD   | 43190.49    | 87          | 4.32E+04     | 87          | TRUE         | TRUE              |
| 1     | ADQLTPAWR  | 612   | 620  | 9              | HLA-A*02:01 | 612           | 87             | ADQLTPAWR   | ADQLTPAWR   | 43190.96    | 87          | 4.32E+04     | 87          | TRUE         | TRUE              |
| 1     | EDLNFNKVT  | 801   | 809  | 9              | HLA-A*02:01 | 801           | 87             | EDLNFNKVT   | EDLNFNKVT   | 43212       | 87          | 4.32E+04     | 87          | TRUE         | TRUE              |
| 1     | AEHVDTSYE  | 639   | 647  | 9              | HLA-A*02:01 | 639           | 87             | AEHVDTSYE   | AEHVDTSYE   | 43252.23    | 87          | 4.33E+04     | 87          | TRUE         | TRUE              |
| 1     | NESLIDLQE  | 1176  | 1184 | 9              | HLA-A*02:01 | 1176          |                |             |             |             |             |              |             |              |                   |

| seq # | peptide    | start | end  | peptide length | allele      | peptide index | median binding | netmhcan_ba | netmhcan_ba | netmhcan_ba | netmhcan_ba | legacy score | legacy rank | scores equal | percentiles equal |
|-------|------------|-------|------|----------------|-------------|---------------|----------------|-------------|-------------|-------------|-------------|--------------|-------------|--------------|-------------------|
| 1     | PSGFNTLKP  | 210   | 218  | 9              | HLA-A*02:01 | 210           | 90             | PSGFNTLKP   | PSGFNTLKP   | 44056.11    | 90          | 4.41E+04     | 90          | TRUE         | TRUE              |
| 1     | TRNIDATST  | 425   | 433  | 9              | HLA-A*02:01 | 425           | 90             | TRNIDATST   | TRNIDATST   | 44083.29    | 90          | 4.41E+04     | 90          | TRUE         | TRUE              |
| 1     | SDFTSDVRD  | 556   | 564  | 9              | HLA-A*02:01 | 556           | 90             | SDFTSDVRD   | SDFTSDVRD   | 44087.09    | 90          | 4.41E+04     | 90          | TRUE         | TRUE              |
| 1     | CKFDEDDSE  | 1236  | 1244 | 9              | HLA-A*02:01 | 1236          | 91             | CKFDEDDSE   | CKFDEDDSE   | 44172.1     | 91          | 4.42E+04     | 91          | TRUE         | TRUE              |
| 1     | DVVRQIAPGQ | 393   | 401  | 9              | HLA-A*02:01 | 393           | 91             | DVVRQIAPGQ  | DVVRQIAPGQ  | 44208.44    | 91          | 4.42E+04     | 91          | TRUE         | TRUE              |
| 1     | QDVNCTDVS  | 599   | 607  | 9              | HLA-A*02:01 | 599           | 91             | QDVNCTDVS   | QDVNCTDVS   | 44255.82    | 91          | 4.43E+04     | 91          | TRUE         | TRUE              |
| 1     | GSTMNNKSQ  | 104   | 112  | 9              | HLA-A*02:01 | 104           | 91             | GSTMNNKSQ   | GSTMNNKSQ   | 44293.65    | 91          | 4.43E+04     | 91          | TRUE         | TRUE              |
| 1     | DAGFMKQYG  | 812   | 820  | 9              | HLA-A*02:01 | 812           | 91             | DAGFMKQYG   | DAGFMKQYG   | 44336.81    | 91          | 4.43E+04     | 91          | TRUE         | TRUE              |
| 1     | DDVRQIAPG  | 392   | 400  | 9              | HLA-A*02:01 | 392           | 91             | DDVRQIAPG   | DDVRQIAPG   | 44359.83    | 91          | 4.44E+04     | 91          | TRUE         | TRUE              |
| 1     | WRIYSTGNN  | 619   | 627  | 9              | HLA-A*02:01 | 619           | 91             | WRIYSTGNN   | WRIYSTGNN   | 44367.04    | 91          | 4.44E+04     | 91          | TRUE         | TRUE              |
| 1     | DENGITIDA  | 267   | 275  | 9              | HLA-A*02:01 | 267           | 92             | DENGITIDA   | DENGITIDA   | 44389.13    | 92          | 4.44E+04     | 92          | TRUE         | TRUE              |
| 1     | VRDLPSPGFN | 206   | 214  | 9              | HLA-A*02:01 | 206           | 92             | VRDLPSPGFN  | VRDLPSPGFN  | 44404.51    | 92          | 4.44E+04     | 92          | TRUE         | TRUE              |
| 1     | YDENGITID  | 266   | 274  | 9              | HLA-A*02:01 | 266           | 92             | YDENGITID   | YDENGITID   | 44405.94    | 92          | 4.44E+04     | 92          | TRUE         | TRUE              |
| 1     | VKQLSSNFG  | 945   | 953  | 9              | HLA-A*02:01 | 945           | 92             | VKQLSSNFG   | VKQLSSNFG   | 44411.24    | 92          | 4.44E+04     | 92          | TRUE         | TRUE              |
| 1     | PTKRSFIED  | 794   | 802  | 9              | HLA-A*02:01 | 794           | 92             | PTKRSFIED   | PTKRSFIED   | 44417       | 92          | 4.44E+04     | 92          | TRUE         | TRUE              |
| 1     | NNVFOTQAG  | 626   | 634  | 9              | HLA-A*02:01 | 626           | 92             | NNVFOTQAG   | NNVFOTQAG   | 44433.33    | 92          | 4.44E+04     | 92          | TRUE         | TRUE              |
| 1     | NNTIAIPTN  | 691   | 699  | 9              | HLA-A*02:01 | 691           | 92             | NNTIAIPTN   | NNTIAIPTN   | 44489.16    | 92          | 4.45E+04     | 92          | TRUE         | TRUE              |
| 1     | PFSPOGKPC  | 459   | 467  | 9              | HLA-A*02:01 | 459           | 92             | PFSPOGKPC   | PFSPOGKPC   | 44515.13    | 92          | 4.45E+04     | 92          | TRUE         | TRUE              |
| 1     | LNESIDILQ  | 1175  | 1183 | 9              | HLA-A*02:01 | 1175          | 92             | LNESIDILQ   | LNESIDILQ   | 44527.68    | 92          | 4.45E+04     | 92          | TRUE         | TRUE              |
| 1     | ACNFELCDN  | 127   | 135  | 9              | HLA-A*02:01 | 127           | 92             | ACNFELCDN   | ACNFELCDN   | 44551.77    | 92          | 4.46E+04     | 92          | TRUE         | TRUE              |
| 1     | VCGPKLSTD  | 510   | 518  | 9              | HLA-A*02:01 | 510           | 92             | VCGPKLSTD   | VCGPKLSTD   | 44560.45    | 92          | 4.46E+04     | 92          | TRUE         | TRUE              |
| 1     | NEVAKNLNE  | 1169  | 1177 | 9              | HLA-A*02:01 | 1169          | 92             | NEVAKNLNE   | NEVAKNLNE   | 44640.07    | 92          | 4.46E+04     | 92          | TRUE         | TRUE              |
| 1     | NFRVPSGSD  | 304   | 312  | 9              | HLA-A*02:01 | 304           | 92             | NFRVPSGSD   | NFRVPSGSD   | 44642       | 92          | 4.46E+04     | 92          | TRUE         | TRUE              |
| 1     | ADSFVVKGD  | 384   | 392  | 9              | HLA-A*02:01 | 384           | 93             | ADSFVVKGD   | ADSFVVKGD   | 44649.25    | 93          | 4.46E+04     | 93          | TRUE         | TRUE              |
| 1     | LDRCTTFDD  | 16    | 24   | 9              | HLA-A*02:01 | 16            | 93             | LDRCTTFDD   | LDRCTTFDD   | 44649.25    | 93          | 4.46E+04     | 93          | TRUE         | TRUE              |
| 1     | DCNMVYCGD  | 719   | 727  | 9              | HLA-A*02:01 | 719           | 93             | DCNMVYCGD   | DCNMVYCGD   | 44780.35    | 93          | 4.48E+04     | 93          | TRUE         | TRUE              |
| 1     | LGKLDQVVN  | 927   | 935  | 9              | HLA-A*02:01 | 927           | 93             | LGKLDQVVN   | LGKLDQVVN   | 44804.58    | 93          | 4.48E+04     | 93          | TRUE         | TRUE              |
| 1     | PKTSEILD   | 565   | 573  | 9              | HLA-A*02:01 | 565           | 93             | PKTSEILD    | PKTSEILD    | 44841.93    | 93          | 4.48E+04     | 93          | TRUE         | TRUE              |
| 1     | DDVQAPNYT  | 23    | 31   | 9              | HLA-A*02:01 | 23            | 93             | DDVQAPNYT   | DDVQAPNYT   | 44894.86    | 93          | 4.49E+04     | 93          | TRUE         | TRUE              |
| 1     | VRQIAPGQT  | 394   | 402  | 9              | HLA-A*02:01 | 394           | 93             | VRQIAPGQT   | VRQIAPGQT   | 44910.87    | 93          | 4.49E+04     | 93          | TRUE         | TRUE              |
| 1     | LDSEKEELD  | 1127  | 1135 | 9              | HLA-A*02:01 | 1127          | 94             | LDSEKEELD   | LDSEKEELD   | 44950.25    | 94          | 4.50E+04     | 94          | TRUE         | TRUE              |
| 1     | SCGSCCKFD  | 1231  | 1239 | 9              | HLA-A*02:01 | 1231          | 94             | SCGSCCKFD   | SCGSCCKFD   | 44950.25    | 94          | 4.50E+04     | 94          | TRUE         | TRUE              |
| 1     | NNTVYDPLQ  | 1116  | 1124 | 9              | HLA-A*02:01 | 1116          | 94             | NNTVYDPLQ   | NNTVYDPLQ   | 44960.95    | 94          | 4.50E+04     | 94          | TRUE         | TRUE              |
| 1     | IKNQCVNFN  | 520   | 528  | 9              | HLA-A*02:01 | 520           | 94             | IKNQCVNFN   | IKNQCVNFN   | 44970.2     | 94          | 4.50E+04     | 94          | TRUE         | TRUE              |
| 1     | SEKSGNFKH  | 173   | 181  | 9              | HLA-A*02:01 | 173           | 94             | SEKSGNFKH   | SEKSGNFKH   | 44990.65    | 94          | 4.50E+04     | 94          | TRUE         | TRUE              |
| 1     | QDRNTRFV   | 756   | 764  | 9              | HLA-A*02:01 | 756           | 94             | QDRNTRFV    | QDRNTRFV    | 45014.5     | 94          | 4.50E+04     | 94          | TRUE         | TRUE              |
| 1     | NKAISQIQE  | 910   | 918  | 9              | HLA-A*02:01 | 910           | 94             | NKAISQIQE   | NKAISQIQE   | 45050.08    | 94          | 4.51E+04     | 94          | TRUE         | TRUE              |
| 1     | DATSTGNYN  | 429   | 437  | 9              | HLA-A*02:01 | 429           | 94             | DATSTGNYN   | DATSTGNYN   | 45108.6     | 94          | 4.51E+04     | 94          | TRUE         | TRUE              |
| 1     | DFTDSVRDP  | 557   | 565  | 9              | HLA-A*02:01 | 557           | 94             | DFTDSVRDP   | DFTDSVRDP   | 45191.15    | 94          | 4.52E+04     | 94          | TRUE         | TRUE              |
| 1     | EELDKYFKN  | 1132  | 1140 | 9              | HLA-A*02:01 | 1132          | 94             | EELDKYFKN   | EELDKYFKN   | 45193.1     | 94          | 4.52E+04     | 94          | TRUE         | TRUE              |
| 1     | PKLSTDLK   | 513   | 521  | 9              | HLA-A*02:01 | 513           | 95             | PKLSTDLK    | PKLSTDLK    | 45261.62    | 95          | 4.53E+04     | 95          | TRUE         | TRUE              |
| 1     | VYKGYQPID  | 196   | 204  | 9              | HLA-A*02:01 | 196           | 95             | VYKGYQPID   | VYKGYQPID   | 45283.66    | 95          | 4.53E+04     | 95          | TRUE         | TRUE              |
| 1     | SPQIITTDN  | 1093  | 1101 | 9              | HLA-A*02:01 | 1093          | 95             | SPQIITTDN   | SPQIITTDN   | 45335.61    | 95          | 4.53E+04     | 95          | TRUE         | TRUE              |
| 1     | GDDVRQIAP  | 391   | 399  | 9              | HLA-A*02:01 | 391           | 95             | GDDVRQIAP   | GDDVRQIAP   | 45340.03    | 95          | 4.53E+04     | 95          | TRUE         | TRUE              |
| 1     | LDKYFKNHT  | 1134  | 1142 | 9              | HLA-A*02:01 | 1134          | 95             | LDKYFKNHT   | LDKYFKNHT   | 45377.33    | 95          | 4.54E+04     | 95          | TRUE         | TRUE              |
| 1     | NPVIFPKDG  | 78    | 86   | 9              | HLA-A*02:01 | 78            | 95             | NPVIFPKDG   | NPVIFPKDG   | 45378.82    | 95          | 4.54E+04     | 95          | TRUE         | TRUE              |
| 1     | EKSNNVRGW  | 93    | 101  | 9              | HLA-A*02:01 | 93            | 95             | EKSNNVRGW   | EKSNNVRGW   | 45421.07    | 95          | 4.54E+04     | 95          | TRUE         | TRUE              |
| 1     | LRPFERDIS  | 448   | 456  | 9              | HLA-A*02:01 | 448           | 95             | LRPFERDIS   | LRPFERDIS   | 45444.16    | 95          | 4.54E+04     | 95          | TRUE         | TRUE              |
| 1     | NKVTLADAG  | 806   | 814  | 9              | HLA-A*02:01 | 806           | 95             | NKVTLADAG   | NKVTLADAG   | 45462.86    | 95          | 4.55E+04     | 95          | TRUE         | TRUE              |
| 1     | GKLDQVVNQ  | 928   | 936  | 9              | HLA-A*02:01 | 928           | 96             | GKLDQVVNQ   | GKLDQVVNQ   | 45532.25    | 96          | 4.55E+04     | 96          | TRUE         | TRUE              |
| 1     | DCSQNPALAE | 277   | 285  | 9              | HLA-A*02:01 | 277           | 96             | DCSQNPALAE  | DCSQNPALAE  | 45550.49    | 96          | 4.56E+04     | 96          | TRUE         | TRUE              |
| 1     | GNPVIFFKD  | 77    | 85   | 9              | HLA-A*02:01 | 77            | 96             | GNPVIFFKD   | GNPVIFFKD   | 45628.93    | 96          | 4.56E+04     | 96          | TRUE         | TRUE              |
| 1     | DSFVVKGGD  | 385   | 393  | 9              | HLA-A*02:01 | 385           | 96             | DSFVVKGGD   | DSFVVKGGD   | 45648.68    | 96          | 4.56E+04     | 96          | TRUE         | TRUE              |
| 1     | SKRFQPFQ   | 542   | 550  | 9              | HLA-A*02:01 | 542           | 96             | SKRFQPFQ    | SKRFQPFQ    | 45671.89    | 96          | 4.57E+04     | 96          | TRUE         | TRUE              |
| 1     | YDLPQPELD  | 1120  | 1128 | 9              | HLA-A*02:01 | 1120          | 96             | YDLPQPELD   | YDLPQPELD   | 45712.43    | 96          | 4.57E+04     | 96          | TRUE         | TRUE              |
| 1     | SKPMGTQTH  | 141   | 149  | 9              | HLA-A*02:01 | 141           | 96             | SKPMGTQTH   | SKPMGTQTH   | 45712.93    | 96          | 4.57E+04     | 96          | TRUE         | TRUE              |
| 1     | NKXRVILRH  | 437   | 445  | 9              | HLA-A*02:01 | 437           | 96             | NKXRVILRH   | NKXRVILRH   | 45824.36    | 96          | 4.58E+04     | 96          | TRUE         | TRUE              |
| 1     | GKAYPRREG  | 1067  | 1075 | 9              | HLA-A*02:01 | 1067          | 97             | GKAYPRREG   | GKAYPRREG   | 45864.54    | 97          | 4.58E+04     | 97          | TRUE         | TRUE              |
| 1     | CKFDEDDSE  | 1235  | 1243 | 9              | HLA-A*02:01 | 1235          | 97             | CKFDEDDSE   | CKFDEDDSE   | 45925.1     | 97          | 4.59E+04     | 97          | TRUE         | TRUE              |
| 1     | TDSVRDPKT  | 559   | 567  | 9              | HLA-A*02:01 | 559           | 97             | TDSVRDPKT   | TDSVRDPKT   | 45929.57    | 97          | 4.59E+04     | 97          | TRUE         | TRUE              |
| 1     | AEDQNRNRE  | 754   | 762  | 9              | HLA-A*02:01 | 754           | 97             | AEDQNRNRE   | AEDQNRNRE   | 45931.58    | 97          | 4.59E+04     | 97          | TRUE         | TRUE              |
| 1     | PNYTOHTSS  | 28    | 36   | 9              | HLA-A*02:01 | 28            | 97             | PNYTOHTSS   | PNYTOHTSS   | 45939.02    | 97          | 4.59E+04     | 97          | TRUE         | TRUE              |
| 1     | DSVRDPKTS  | 560   | 568  | 9              | HLA-A*02:01 | 560           | 97             | DSVRDPKTS   | DSVRDPKTS   | 45941.51    | 97          | 4.59E+04     | 97          | TRUE         | TRUE              |
| 1     | PGQTGVIA   | 399   | 407  | 9              | HLA-A*02:01 | 399           | 97             | PGQTGVIA    | PGQTGVIA    | 45979.3     | 97          | 4.60E+04     | 97          | TRUE         | TRUE              |
| 1     | TEKSNVVRG  | 92    | 100  | 9              | HLA-A*02:01 | 92            | 97             | TEKSNVVRG   | TEKSNVVRG   | 46075.92    | 97          | 4.61E+04     | 97          | TRUE         | TRUE              |
| 1     | TPGTNASSE  | 585   | 593  | 9              | HLA-A*02:01 | 585           | 97             | TPGTNASSE   | TPGTNASSE   | 46206.22    | 97          | 4.62E+04     | 97          | TRUE         | TRUE              |
| 1     | SCCKFDEDD  | 1234  | 1242 | 9              | HLA-A*02:01 | 1234          | 98             | SCCKFDEDD   | SCCKFDEDD   | 46289.8     | 98          | 4.63E+04     | 98          | TRUE         | TRUE              |
| 1     | DPLOPELDS  | 1121  | 1129 | 9              | HLA-A*02:01 | 1121          | 98             | DPLOPELDS   | DPLOPELDS   | 46306.31    | 98          | 4.63E+04     | 98          | TRUE         | TRUE              |
| 1     | LNEVAKNLN  | 1168  | 1176 | 9              | HLA-A*02:01 | 1168          | 98             | LNEVAKNLN   | LNEVAKNLN   | 46312.34    | 98          | 4.63E+04     | 98          | TRUE         | TRUE              |
| 1     | TYVPSQERN  | 1048  | 1056 | 9              | HLA-A*02:01 | 1048          | 98             | TYVPSQERN   | TYVPSQERN   | 46316.34    | 98          | 4.63E+04     | 98          | TRUE         | TRUE              |
| 1     | QPELDSFKE  | 1124  | 1132 | 9              | HLA-A*02:01 | 1124          | 98             | QPELDSFKE   | QPELDSFKE   | 46429.72    | 98          | 4.64E+04     | 98          | TRUE         | TRUE              |
| 1     | VKSFEIDKG  | 290   | 298  | 9              | HLA-A*02:01 | 290           | 98             | VKSFEIDKG   | VKSFEIDKG   | 46440.29    | 98          | 4.64E+04     | 98          | TRUE         | TRUE              |
| 1     | PREGVVFVN  | 1072  | 1080 | 9              | HLA-A*02:01 | 1072          | 98             | PREGVVFVN   | PREGVVFVN   | 46551.45    | 98          | 4.65E+04     | 98          | TRUE         | TRUE              |
| 1     | EDDSEPVVK  | 1240  | 1248 | 9              | HLA-A*02:01 | 1240          | 99             | EDDSEPVVK   | EDDSEPVVK   | 46595.3     | 99          | 4.65E+04     | 99          | TRUE         | TRUE              |
| 1     | TDVAVCSQN  | 273   | 281  | 9              | HLA-A*02:01 | 273           | 99             | TDVAVCSQN   | TDVAVCSQN   | 46694.21    | 99          | 4.66E+04     | 99          | TRUE         | TRUE              |
| 1     | DRLTGRQL   | 976   | 984  | 9              | HLA-A*02:01 | 976           | 99             | DRLTGRQL    | DRLTGRQL    | 46703.81    | 99          | 4.67E+04     | 99          | TRUE         | TRUE              |
| 1     | KNHTSPDVD  | 1139  | 1147 | 9              | HLA-A*02:01 | 1139          | 99             | KNHTSPDVD   | KNHTSPDVD   | 46713.93    | 99          | 4.67E+04     | 99          | TRUE         | TRUE              |
| 1     | QDVVNQNAQ  | 931   | 939  | 9              | HLA-A*02:01 | 931           | 99             | QDVVNQNAQ   | QDVVNQNAQ   | 46758.93    | 99          | 4.67E+04     | 99          | TRUE         | TRUE              |
| 1     | GKLRPFERD  | 446   | 454  | 9              | HLA-A*02:01 | 446           | 99             | GKLRPFERD   | GKLRPFERD   | 46764       | 99          | 4.67E+04     | 99          | TRUE         | TRUE              |
| 1     | ENKQKQIANQ | 900   | 908  | 9              | HLA-A*02:01 | 900           | 99             | ENKQKQIANQ  | ENKQKQIANQ  | 46788.8     | 99          | 4.67E+04     | 99          | TRUE         | TRUE              |
| 1     | EFVFNKNDG  | 184   | 192  | 9              | HLA-A*02:01 | 184           | 99             | EFVFNKNDG   | EFVFNKNDG   | 46806       | 99          | 4.68E+04     | 99          | TRUE         | TRUE              |
| 1     | LDVSEKSGN  | 170   | 178  | 9              | HLA-A*02:01 | 170           | 99             | LDVSEKSGN   | LDVSEKSGN   | 46910.44    | 99          | 4.69E+04     | 99          | TRUE         | TRUE              |
| 1     | AWERKKISN  | 339   | 347  | 9              | HLA-A*02:01 | 339           | 99             | AWERKKISN   | AWERKKISN   | 46924.14    | 99          | 4.69E+04     | 99          | TRUE         | TRUE              |
| 1     | PELDSFKEE  | 1125  | 1133 | 9              | HLA-A*02:01 | 1125          | 99             | PELDSFKEE   | PELDSFKEE   | 46932.29    | 99          | 4.69E+04     | 99          | TRUE         | TRUE              |
| 1     | QKQIANQFN  | 902   | 910  |                |             |               |                |             |             |             |             |              |             |              |                   |

| seq # | peptide    | start | end  | peptide length | allele      | peptide index | median binding | consensus | perc        | smm | IC50    | smm  | percentil  | ann | IC50 | ann  | percentile | comblib_siden | comblib_siden | legacy | consens | percentiles | equal |
|-------|------------|-------|------|----------------|-------------|---------------|----------------|-----------|-------------|-----|---------|------|------------|-----|------|------|------------|---------------|---------------|--------|---------|-------------|-------|
| 1     | FSISITTEV  | 700   | 708  | 9              | HLA-A*02:01 | 700           | 0.27           | 0.27      | 111.9721455 | 1.8 | 30.13   | 0.27 | 2.64E-06   | 0.2 | 0.27 | TRUE |            |               |               |        | 0.27    | TRUE        |       |
| 1     | FIAGLIUAV  | 1202  | 1210 | 9              | HLA-A*02:01 | 1202          | 0.4            | 0.4       | 20.18877649 | 0.4 | 10.29   | 0.09 | 2.89E-05   | 1.7 | 0.4  | TRUE |            |               |               |        | 0.4     | TRUE        |       |
| 1     | VLVNSFTFS  | 354   | 362  | 9              | HLA-A*02:01 | 354           | 0.64           | 0.64      | 182.0161819 | 2.6 | 70.21   | 0.64 | 3.72E-06   | 0.3 | 0.64 | TRUE |            |               |               |        | 0.64    | TRUE        |       |
| 1     | RIDQSITTV  | 982   | 990  | 9              | HLA-A*02:01 | 982           | 0.7            | 0.7       | 36.73753391 | 0.7 | 16.66   | 0.16 | 1.09E-05   | 0.8 | 0.7  | TRUE |            |               |               |        | 0.7     | TRUE        |       |
| 1     | FILFLITLT  | 2     | 10   | 9              | HLA-A*02:01 | 2             | 0.7            | 0.7       | 41.03800441 | 0.7 | 71.52   | 0.66 | 0.000171   | 9.1 | 0.7  | TRUE |            |               |               |        | 9.1     | TRUE        |       |
| 1     | VIADNWLK   | 404   | 412  | 9              | HLA-A*02:01 | 404           | 0.9            | 0.9       | 51.69471186 | 0.9 | 50.27   | 0.46 | 0.00017824 | 4.4 | 0.9  | TRUE |            |               |               |        | 4.4     | TRUE        |       |
| 1     | RIDKVEAEV  | 965   | 973  | 9              | HLA-A*02:01 | 965           | 0.9            | 0.9       | 53.2243051  | 0.9 | 38.95   | 0.35 | 1.47E-05   | 0.9 | 0.9  | TRUE |            |               |               |        | 0.9     | TRUE        |       |
| 1     | YLKPTFTML  | 256   | 264  | 9              | HLA-A*02:01 | 256           | 1              | 1         | 54.33879457 | 1   | 18.56   | 0.17 | 5.55E-05   | 3.2 | 1    | TRUE |            |               |               |        | 3.2     | TRUE        |       |
| 1     | VINDILSLR  | 958   | 966  | 9              | HLA-A*02:01 | 958           | 1.1            | 1.1       | 58.35929005 | 1.1 | 33.57   | 0.3  | 9.73E-05   | 5.5 | 1.1  | TRUE |            |               |               |        | 5.5     | TRUE        |       |
| 1     | HLMSFQAA   | 1030  | 1038 | 9              | HLA-A*02:01 | 1030          | 1.1            | 1.1       | 101.6506125 | 1.6 | 30.89   | 0.28 | 1.88E-05   | 1.1 | 1.1  | TRUE |            |               |               |        | 1.1     | TRUE        |       |
| 1     | LLFNKVTLA  | 803   | 811  | 9              | HLA-A*02:01 | 803           | 1.2            | 1.2       | 63.69568317 | 1.2 | 25.41   | 0.22 | 7.52E-05   | 4.3 | 1.2  | TRUE |            |               |               |        | 4.3     | TRUE        |       |
| 1     | VVFVHVTYV  | 1042  | 1050 | 9              | HLA-A*02:01 | 1042          | 1.2            | 1.2       | 64.87987433 | 1.2 | 36.56   | 0.33 | 6.17E-05   | 3.6 | 1.2  | TRUE |            |               |               |        | 3.6     | TRUE        |       |
| 1     | MIAAYTAAL  | 851   | 859  | 9              | HLA-A*02:01 | 851           | 1.2            | 1.2       | 65.3296014  | 1.2 | 14.39   | 0.13 | 0.00022542 | 13  | 1.2  | TRUE |            |               |               |        | 13      | TRUE        |       |
| 1     | FLFLTLT    | 4     | 12   | 9              | HLA-A*02:01 | 4             | 1.2            | 1.2       | 158.8949154 | 2.3 | 141.86  | 1.2  | 1.52E-05   | 1   | 1.2  | TRUE |            |               |               |        | 1       | TRUE        |       |
| 1     | LLTDDMIAA  | 846   | 854  | 9              | HLA-A*02:01 | 846           | 1.4            | 1.4       | 78.00276543 | 1.4 | 32.91   | 0.29 | 0.00011376 | 6.3 | 1.4  | TRUE |            |               |               |        | 6.3     | TRUE        |       |
| 1     | GTSAAYFV   | 246   | 254  | 9              | HLA-A*02:01 | 246           | 1.4            | 1.4       | 269.8422814 | 3.4 | 167.91  | 1.4  | 9.62E-06   | 0.7 | 1.4  | TRUE |            |               |               |        | 0.7     | TRUE        |       |
| 1     | ELLNAPATV  | 502   | 510  | 9              | HLA-A*02:01 | 502           | 2              | 2         | 293.8393807 | 3.6 | 279.55  | 2    | 1.93E-05   | 1.2 | 2    | TRUE |            |               |               |        | 1.2     | TRUE        |       |
| 1     | NVYADSVF   | 381   | 389  | 9              | HLA-A*02:01 | 381           | 2.3            | 2.3       | 151.7434661 | 2.3 | 87.86   | 0.77 | 6.53E-05   | 3.7 | 2.3  | TRUE |            |               |               |        | 3.7     | TRUE        |       |
| 1     | KQMYKPTPL  | 768   | 776  | 9              | HLA-A*02:01 | 768           | 2.3            | 2.3       | 154.5845878 | 2.3 | 47.7    | 0.43 | 7.24E-05   | 3.3 | 2.3  | TRUE |            |               |               |        | 3.3     | TRUE        |       |
| 1     | SVIAYTMSL  | 673   | 681  | 9              | HLA-A*02:01 | 673           | 2.3            | 2.3       | 164.1005362 | 2.3 | 37.41   | 0.33 | 0.00034914 | 17  | 2.3  | TRUE |            |               |               |        | 17      | TRUE        |       |
| 1     | ELCDNPFFA  | 131   | 139  | 9              | HLA-A*02:01 | 131           | 2.5            | 2.5       | 306.2739079 | 3.7 | 408.87  | 2.5  | 4.03E-05   | 2.3 | 2.5  | TRUE |            |               |               |        | 2.3     | TRUE        |       |
| 1     | ALVSGTATA  | 858   | 866  | 9              | HLA-A*02:01 | 858           | 2.6            | 2.6       | 204.225515  | 2.8 | 122.57  | 0.97 | 4.57E-05   | 2.6 | 2.6  | TRUE |            |               |               |        | 2.6     | TRUE        |       |
| 1     | GLTVLPPLL  | 839   | 847  | 9              | HLA-A*02:01 | 839           | 2.8            | 2.8       | 207.5439127 | 2.8 | 130.4   | 1.2  | 0.00025177 | 14  | 2.8  | TRUE |            |               |               |        | 14      | TRUE        |       |
| 1     | NUNESLDL   | 1174  | 1182 | 9              | HLA-A*02:01 | 1174          | 2.8            | 2.8       | 208.9825384 | 2.8 | 177.32  | 1.4  | 0.00011041 | 6.2 | 2.8  | TRUE |            |               |               |        | 6.2     | TRUE        |       |
| 1     | FSTFKCYGV  | 361   | 369  | 9              | HLA-A*02:01 | 361           | 2.8            | 2.8       | 407.4834739 | 4.2 | 504.47  | 2.8  | 3.72E-05   | 2.1 | 2.8  | TRUE |            |               |               |        | 2.1     | TRUE        |       |
| 1     | VYVKGYOPI  | 195   | 203  | 9              | HLA-A*02:01 | 195           | 2.9            | 2.9       | 215.332707  | 2.9 | 47.04   | 0.43 | 0.00012359 | 6.8 | 2.9  | TRUE |            |               |               |        | 6.8     | TRUE        |       |
| 1     | SITTEVMPV  | 703   | 711  | 9              | HLA-A*02:01 | 703           | 2.9            | 2.9       | 217.8261422 | 2.9 | 50.81   | 0.46 | 0.00017498 | 9.3 | 2.9  | TRUE |            |               |               |        | 9.3     | TRUE        |       |
| 1     | FVSGNCDVV  | 1103  | 1111 | 9              | HLA-A*02:01 | 1103          | 3              | 3         | 230.202481  | 3   | 290.37  | 2    | 0.00011015 | 6.2 | 3    | TRUE |            |               |               |        | 6.2     | TRUE        |       |
| 1     | KQLSSNFGA  | 946   | 954  | 9              | HLA-A*02:01 | 946           | 3.2            | 3.2       | 242.1642333 | 3.2 | 141.16  | 1.2  | 0.00012882 | 7   | 3.2  | TRUE |            |               |               |        | 7       | TRUE        |       |
| 1     | TSYECDIPI  | 644   | 652  | 9              | HLA-A*02:01 | 644           | 3.2            | 3.2       | 1282.655418 | 6.4 | 639.51  | 3.2  | 1.17E-05   | 0.8 | 3.2  | TRUE |            |               |               |        | 0.8     | TRUE        |       |
| 1     | ATAGWTFGA  | 864   | 872  | 9              | HLA-A*02:01 | 864           | 3.3            | 3.3       | 258.291432  | 3.3 | 207.35  | 1.6  | 0.00040099 | 13  | 3.3  | TRUE |            |               |               |        | 13      | TRUE        |       |
| 1     | GLUAYMVT   | 1205  | 1213 | 9              | HLA-A*02:01 | 1205          | 3.3            | 3.3       | 260.581373  | 3.3 | 242.04  | 1.8  | 6.85E-05   | 3.9 | 3.3  | TRUE |            |               |               |        | 3.9     | TRUE        |       |
| 1     | FLRYSYVLT  | 59    | 67   | 9              | HLA-A*02:01 | 59            | 3.3            | 3.3       | 261.8846237 | 3.3 | 394.11  | 2.4  | 0.00033037 | 17  | 3.3  | TRUE |            |               |               |        | 17      | TRUE        |       |
| 1     | ILICCMTSC  | 1214  | 1222 | 9              | HLA-A*02:01 | 1214          | 3.3            | 3.3       | 264.3078123 | 3.3 | 403.87  | 2.5  | 0.0002319  | 13  | 3.3  | TRUE |            |               |               |        | 13      | TRUE        |       |
| 1     | IIUNSNV    | 115   | 123  | 9              | HLA-A*02:01 | 115           | 3.4            | 3.4       | 267.9847002 | 3.4 | 228.99  | 1.7  | 0.00033343 | 17  | 3.4  | TRUE |            |               |               |        | 17      | TRUE        |       |
| 1     | ITTDNTEV   | 1096  | 1104 | 9              | HLA-A*02:01 | 1096          | 3.4            | 3.4       | 267.9847002 | 3.4 | 338.82  | 2.2  | 0.00043954 | 21  | 3.4  | TRUE |            |               |               |        | 21      | TRUE        |       |
| 1     | ALGKQDDVV  | 926   | 934  | 9              | HLA-A*02:01 | 926           | 3.6            | 3.6       | 291.1454451 | 3.6 | 717.01  | 3.4  | 0.00015922 | 8.5 | 3.6  | TRUE |            |               |               |        | 8.5     | TRUE        |       |
| 1     | AIYMVITLL  | 1208  | 1216 | 9              | HLA-A*02:01 | 1208          | 3.6            | 3.6       | 291.8166046 | 3.6 | 711.15  | 3.4  | 0.00031117 | 16  | 3.6  | TRUE |            |               |               |        | 16      | TRUE        |       |
| 1     | TMNNKQSV   | 106   | 114  | 9              | HLA-A*02:01 | 106           | 3.7            | 3.7       | 306.2739079 | 3.7 | 254.01  | 1.8  | 0.0001932  | 12  | 3.7  | TRUE |            |               |               |        | 12      | TRUE        |       |
| 1     | VLSFELLNA  | 498   | 506  | 9              | HLA-A*02:01 | 498           | 3.7            | 3.7       | 314.854569  | 3.7 | 273.66  | 2    | 0.00104232 | 35  | 3.7  | TRUE |            |               |               |        | 35      | TRUE        |       |
| 1     | YQDVNCTDV  | 988   | 996  | 9              | HLA-A*02:01 | 988           | 3.8            | 3.8       | 322.1884741 | 3.8 | 612.82  | 3.2  | 0.00070795 | 28  | 3.8  | TRUE |            |               |               |        | 28      | TRUE        |       |
| 1     | CMTSCSCSL  | 1218  | 1226 | 9              | HLA-A*02:01 | 1218          | 4              | 4         | 350.8407252 | 4   | 629.65  | 3.2  | 0.00036141 | 18  | 4    | TRUE |            |               |               |        | 18      | TRUE        |       |
| 1     | RVVLSFEL   | 495   | 503  | 9              | HLA-A*02:01 | 495           | 4              | 4         | 364.0072218 | 4   | 419.83  | 2.5  | 0.00293765 | 59  | 4    | TRUE |            |               |               |        | 59      | TRUE        |       |
| 1     | SLTTTSTAL  | 919   | 927  | 9              | HLA-A*02:01 | 919           | 4              | 4         | 364.843451  | 4   | 300.04  | 2    | 0.00316228 | 60  | 4    | TRUE |            |               |               |        | 60      | TRUE        |       |
| 1     | VLAWNTNRNI | 420   | 428  | 9              | HLA-A*02:01 | 420           | 4.1            | 4.1       | 380.2857045 | 4.1 | 808.52  | 3.7  | 9.04E-05   | 5.1 | 4.1  | TRUE |            |               |               |        | 5.1     | TRUE        |       |
| 1     | VIRACNFEI  | 124   | 132  | 9              | HLA-A*02:01 | 124           | 4.1            | 4.1       | 385.760857  | 4.1 | 786.23  | 3.6  | 0.00012942 | 7.1 | 4.1  | TRUE |            |               |               |        | 7.1     | TRUE        |       |
| 1     | LLQYGSFCT  | 735   | 743  | 9              | HLA-A*02:01 | 735           | 4.1            | 4.1       | 391.8411118 | 4.1 | 541.11  | 2.9  | 0.0012331  | 39  | 4.1  | TRUE |            |               |               |        | 39      | TRUE        |       |
| 1     | YLTDQFLP   | 53    | 61   | 9              | HLA-A*02:01 | 53            | 4.2            | 4.2       | 242.7224795 | 3.2 | 975.48  | 4.2  | 0.00027359 | 15  | 4.2  | TRUE |            |               |               |        | 15      | TRUE        |       |
| 1     | VLYENQKQI  | 897   | 905  | 9              | HLA-A*02:01 | 897           | 4.2            | 4.2       | 399.1259819 | 4.2 | 562.95  | 3    | 8.85E-05   | 5   | 4.2  | TRUE |            |               |               |        | 5       | TRUE        |       |
| 1     | LIAMVMVTI  | 1206  | 1214 | 9              | HLA-A*02:01 | 1206          | 4.3            | 4.3       | 419.8653158 | 4.3 | 691.85  | 3.4  | 0.00435512 | 68  | 4.3  | TRUE |            |               |               |        | 68      | TRUE        |       |
| 1     | FMKQYGECL  | 815   | 823  | 9              | HLA-A*02:01 | 815           | 4.3            | 4.3       | 422.7756832 | 4.3 | 698.66  | 3.4  | 0.00083946 | 31  | 4.3  | TRUE |            |               |               |        | 31      | TRUE        |       |
| 1     | KLDPDFMGC  | 411   | 419  | 9              | HLA-A*02:01 | 411           | 4.4            | 4.4       | 439.6529586 | 4.4 | 1013.85 | 4.3  | 0.00054866 | 24  | 4.4  | TRUE |            |               |               |        | 24      | TRUE        |       |
| 1     | AILTAFSPA  | 233   | 241  | 9              | HLA-A*02:01 | 233           | 4.6            | 4.6       | 457.2039776 | 4.6 | 351.2   | 2.3  | 0.00049317 | 22  | 4.6  | TRUE |            |               |               |        | 22      | TRUE        |       |
| 1     | MIFDNAFNC  | 151   | 159  | 9              | HLA-A*02:01 | 151           | 4.6            | 4.6       | 473.271116  | 4.6 | 421.14  | 2.5  | 0.00016916 | 9   | 4.6  | TRUE |            |               |               |        | 9       | TRUE        |       |
| 1     | FLHVTVPVS  | 1044  | 1052 | 9              | HLA-A*02:01 | 1044          | 4.7            | 4.7       | 979.7381063 | 7.3 | 1187.08 | 4.7  | 6.49E-05   | 3.7 | 4.7  | TRUE |            |               |               |        | 3.7     | TRUE        |       |
| 1     | YQPYRVVVL  | 491   | 499  | 9              | HLA-A*02:01 | 491           | 4.8            | 4.8       | 502.4698412 | 4.8 | 862.1   | 3.9  | 0.00554626 | 73  | 4.8  | TRUE |            |               |               |        | 73      | TRUE        |       |
| 1     | PLAEKCSV   | 282   | 290  | 9              | HLA-A*02:01 | 282           | 4.9            | 4.9       | 307.7746213 | 4.1 | 1451.87 | 5.3  | 8.49E-05   | 4.9 | 4.9  | TRUE |            |               |               |        | 4.9     | TRUE        |       |
| 1     | YQTSNFRVV  | 300   | 308  | 9              | HLA-A*02:01 | 300           | 4.9            | 4.9       | 518.9314595 | 4.9 | 1149.79 | 4.6  | 0.00040551 | 20  | 4.9  | TRUE |            |               |               |        | 20      | TRUE        |       |
| 1     | IQAGCUGA   | 631   | 639  | 9              | HLA-A*02:01 | 631           | 4.9            | 4.9       | 524.9400206 | 4.9 | 551.45  | 3    | 0.00010139 | 5.7 | 4.9  | TRUE |            |               |               |        | 5.7     | TRUE        |       |
| 1     | QIMAYRRNGI | 883   | 891  | 9              | HLA-A*02:01 | 883           | 4.9            | 4.9       | 525.505152  | 4.9 | 550.1   | 3    | 0.00057632 | 56  | 4.9  | TRUE |            |               |               |        | 56      | TRUE        |       |
| 1     | GICASYHTV  | 855   | 863  | 9              | HLA-A*02:01 | 855           | 4.9            | 4.9       | 528.5791156 | 4.9 | 546.07  | 3    | 0.0006223  | 26  | 4.9  | TRUE |            |               |               |        | 26      | TRUE        |       |
| 1     | RIUNEAKNL  | 1167  | 1175 | 9              | HLA-A*02:01 | 1167          | 5.1            | 5.1       | 562.4837755 | 5.1 | 940.92  | 4.1  | 0.00054325 | 24  | 5.1  | TRUE |            |               |               |        | 24      | TRUE        |       |
| 1     | GIGYQYRV   | 488   | 496  | 9              | HLA-A*02:01 | 488           | 5.2            | 5.2       | 472.1826226 | 4.6 | 1383.29 | 5.2  | 0.00058345 | 25  | 5.2  | TRUE |            |               |               |        | 25      | TRUE        |       |



| seq # | peptide    | start | end  | peptide length | allele      | peptide index | median binding | consensus | perc        | smm | IC50     | smm | percentil    | ann | IC50 | ann  | percentile | comblib_siden | comblib_siden | legacy | consens | percentiles | equal |
|-------|------------|-------|------|----------------|-------------|---------------|----------------|-----------|-------------|-----|----------|-----|--------------|-----|------|------|------------|---------------|---------------|--------|---------|-------------|-------|
| 1     | LIRAAEIRA  | 994   | 1002 | 9              | HLA-A*02:01 | 994           | 23             | 23        | 9249.32415  | 23  | 15695.36 | 27  | 0.0002138    | 12  | 23   | TRUE |            |               |               |        |         |             |       |
| 1     | VTLLCCMT   | 1212  | 1220 | 9              | HLA-A*02:01 | 1212          | 23             | 23        | 9313.437404 | 23  | 6570.5   | 15  | 0.00298538   | 59  | 23   | TRUE |            |               |               |        |         |             |       |
| 1     | GIGVTQNVL  | 890   | 898  | 9              | HLA-A*02:01 | 890           | 23             | 23        | 9356.42628  | 23  | 12465.29 | 23  | 0.00805378   | 81  | 23   | TRUE |            |               |               |        |         |             |       |
| 1     | TFVSGNCV   | 1102  | 1110 | 9              | HLA-A*02:01 | 1102          | 23             | 23        | 9421.281926 | 23  | 12380.95 | 41  | 0.00017454   | 9.3 | 23   | TRUE |            |               |               |        |         |             |       |
| 1     | QIPFAMQMA  | 877   | 885  | 9              | HLA-A*02:01 | 877           | 23             | 23        | 9443.000224 | 23  | 10423.73 | 20  | 0.00498884   | 71  | 23   | TRUE |            |               |               |        |         |             |       |
| 1     | SVITTEVM   | 709   | 719  | 9              | HLA-A*02:01 | 709           | 23             | 23        | 9459.186635 | 23  | 9359.52  | 18  | 0.00198609   | 50  | 23   | TRUE |            |               |               |        |         |             |       |
| 1     | FSLDSEKS   | 168   | 176  | 9              | HLA-A*02:01 | 168           | 23             | 23        | 9979.52798  | 23  | 15627.92 | 27  | 0.00020549   | 12  | 23   | TRUE |            |               |               |        |         |             |       |
| 1     | TQDLPPY    | 95    | 63   | 9              | HLA-A*02:01 | 55            | 23             | 23        | 10211.98104 | 24  | 12502.84 | 23  | 0.00010568   | 5.9 | 23   | TRUE |            |               |               |        |         |             |       |
| 1     | RUTGRLOS   | 977   | 985  | 9              | HLA-A*02:01 | 977           | 24             | 24        | 6096.91303  | 19  | 13798.74 | 24  | 0.00172982   | 47  | 24   | TRUE |            |               |               |        |         |             |       |
| 1     | VVNOQAQAL  | 933   | 941  | 9              | HLA-A*02:01 | 933           | 24             | 24        | 6267.725963 | 19  | 13609.4  | 24  | 0.00083176   | 31  | 24   | TRUE |            |               |               |        |         |             |       |
| 1     | ITYMSLGADS | 677   | 685  | 9              | HLA-A*02:01 | 677           | 24             | 24        | 7535.464011 | 21  | 13160.35 | 24  | 0.00087902   | 32  | 24   | TRUE |            |               |               |        |         |             |       |
| 1     | AGWTFGAGA  | 866   | 874  | 9              | HLA-A*02:01 | 866           | 24             | 24        | 8552.833153 | 22  | 13569.85 | 24  | 0.00693426   | 78  | 24   | TRUE |            |               |               |        |         |             |       |
| 1     | STGNVVFQT  | 623   | 631  | 9              | HLA-A*02:01 | 623           | 24             | 24        | 8752.05423  | 22  | 13116.85 | 24  | 0.0009528    | 34  | 24   | TRUE |            |               |               |        |         |             |       |
| 1     | NGIGVTQNV  | 889   | 897  | 9              | HLA-A*02:01 | 889           | 24             | 24        | 10165.0613  | 24  | 15660.25 | 27  | 5.06E-05     | 2.9 | 24   | TRUE |            |               |               |        |         |             |       |
| 1     | ITDNTFVS   | 1097  | 1105 | 9              | HLA-A*02:01 | 1097          | 24             | 24        | 10282.76712 | 24  | 20447.83 | 35  | 0.00032659   | 17  | 24   | TRUE |            |               |               |        |         |             |       |
| 1     | VRFPNITNL  | 314   | 322  | 9              | HLA-A*02:01 | 314           | 24             | 24        | 10570.85218 | 24  | 16857.71 | 29  | 0.0005577    | 24  | 24   | TRUE |            |               |               |        |         |             |       |
| 1     | EYSDAFSL   | 162   | 170  | 9              | HLA-A*02:01 | 162           | 24             | 24        | 10693.25688 | 24  | 24469.58 | 42  | 0.00022761   | 13  | 24   | TRUE |            |               |               |        |         |             |       |
| 1     | SGFNTLPI   | 211   | 219  | 9              | HLA-A*02:01 | 211           | 24             | 24        | 13216.3034  | 26  | 13799.49 | 24  | 0.00020417   | 12  | 24   | TRUE |            |               |               |        |         |             |       |
| 1     | QANQFKA    | 944   | 952  | 9              | HLA-A*02:01 | 944           | 25             | 25        | 1637.804345 | 19  | 14253.52 | 25  | 0.00341915   | 62  | 25   | TRUE |            |               |               |        |         |             |       |
| 1     | FLITSGSD   | 7     | 15   | 9              | HLA-A*02:01 | 7             | 25             | 25        | 11405.38632 | 35  | 21544.6  | 37  | 0.00017262   | 9.2 | 25   | TRUE |            |               |               |        |         |             |       |
| 1     | CLIGAEWD   | 635   | 643  | 9              | HLA-A*02:01 | 635           | 25             | 25        | 11510.91906 | 25  | 28318.62 | 51  | 0.00012165   | 6.7 | 25   | TRUE |            |               |               |        |         |             |       |
| 1     | FSPDGPKCT  | 460   | 468  | 9              | HLA-A*02:01 | 460           | 25             | 25        | 11998.03156 | 25  | 21197.76 | 36  | 0.00032494   | 17  | 25   | TRUE |            |               |               |        |         |             |       |
| 1     | FCQLNRL    | 741   | 749  | 9              | HLA-A*02:01 | 741           | 25             | 25        | 19820.28979 | 30  | 13758.94 | 24  | 0.0006115    | 25  | 25   | TRUE |            |               |               |        |         |             |       |
| 1     | SMRGVVPD   | 36    | 44   | 9              | HLA-A*02:01 | 36            | 26             | 26        | 4743.621186 | 17  | 18303.31 | 31  | 0.0006139    | 26  | 26   | TRUE |            |               |               |        |         |             |       |
| 1     | VVRGWVFGS  | 97    | 105  | 9              | HLA-A*02:01 | 97            | 26             | 26        | 5769.125678 | 19  | 14834.27 | 26  | 0.00142233   | 42  | 26   | TRUE |            |               |               |        |         |             |       |
| 1     | YADSFVVK   | 383   | 391  | 9              | HLA-A*02:01 | 383           | 26             | 26        | 7981.968324 | 22  | 15190.79 | 26  | 0.0007766    | 30  | 26   | TRUE |            |               |               |        |         |             |       |
| 1     | CPFGEVFNA  | 323   | 331  | 9              | HLA-A*02:01 | 323           | 26             | 26        | 8000.368662 | 22  | 14616.32 | 26  | 0.00076666   | 30  | 26   | TRUE |            |               |               |        |         |             |       |
| 1     | NASSEVAVL  | 589   | 597  | 9              | HLA-A*02:01 | 589           | 26             | 26        | 9443.000224 | 23  | 15001.98 | 26  | 0.00123367   | 39  | 26   | TRUE |            |               |               |        |         |             |       |
| 1     | FGGFNFSQI  | 779   | 787  | 9              | HLA-A*02:01 | 779           | 26             | 26        | 12621.47176 | 26  | 16136.18 | 28  | 0.00062087   | 26  | 26   | TRUE |            |               |               |        |         |             |       |
| 1     | IPTNFISI   | 696   | 704  | 9              | HLA-A*02:01 | 696           | 26             | 26        | 12679.72983 | 26  | 16964.38 | 29  | 0.00049728   | 22  | 26   | TRUE |            |               |               |        |         |             |       |
| 1     | LTDQMAIAY  | 847   | 855  | 9              | HLA-A*02:01 | 847           | 26             | 26        | 12738.2568  | 26  | 18571.42 | 32  | 0.00012764   | 7   | 26   | TRUE |            |               |               |        |         |             |       |
| 1     | SNQVADIVS  | 346   | 354  | 9              | HLA-A*02:01 | 346           | 26             | 26        | 12767.62152 | 26  | 18476.62 | 31  | 0.00029771   | 16  | 26   | TRUE |            |               |               |        |         |             |       |
| 1     | EQDRNTREV  | 755   | 763  | 9              | HLA-A*02:01 | 755           | 26             | 26        | 12915.46361 | 25  | 23909.52 | 41  | 0.00018323   | 9.8 | 26   | TRUE |            |               |               |        |         |             |       |
| 1     | GINNVTYD   | 1113  | 1121 | 9              | HLA-A*02:01 | 1113          | 26             | 26        | 12945.23683 | 26  | 27614.52 | 49  | 0.00018668   | 10  | 26   | TRUE |            |               |               |        |         |             |       |
| 1     | PWVYVWLGFI | 1195  | 1203 | 9              | HLA-A*02:01 | 1195          | 26             | 26        | 13004.98932 | 26  | 15025.04 | 26  | 0.00044096   | 21  | 26   | TRUE |            |               |               |        |         |             |       |
| 1     | CSQNPLAEI  | 278   | 286  | 9              | HLA-A*02:01 | 278           | 26             | 26        | 13246.77013 | 26  | 13747.62 | 24  | 0.00185695   | 48  | 26   | TRUE |            |               |               |        |         |             |       |
| 1     | KQANQFNK   | 903   | 911  | 9              | HLA-A*02:01 | 903           | 26             | 26        | 13277.30709 | 26  | 27104.49 | 48  | 0.00033752   | 17  | 26   | TRUE |            |               |               |        |         |             |       |
| 1     | FGKGHYHLM  | 1024  | 1032 | 9              | HLA-A*02:01 | 1024          | 26             | 26        | 13586.5753  | 26  | 12753.41 | 23  | 0.00216471   | 52  | 26   | TRUE |            |               |               |        |         |             |       |
| 1     | GGFNFSQIL  | 780   | 788  | 9              | HLA-A*02:01 | 780           | 26             | 26        | 13743.90042 | 26  | 14001.63 | 25  | 0.00095499   | 34  | 26   | TRUE |            |               |               |        |         |             |       |
| 1     | FNGLTGTGV  | 529   | 537  | 9              | HLA-A*02:01 | 529           | 26             | 26        | 13999.41861 | 26  | 16061.8  | 28  | 0.00019311   | 12  | 26   | TRUE |            |               |               |        |         |             |       |
| 1     | SLRSTSQK   | 664   | 672  | 9              | HLA-A*02:01 | 664           | 26             | 26        | 14161.52424 | 26  | 27932.15 | 50  | 0.00015787   | 8.4 | 26   | TRUE |            |               |               |        |         |             |       |
| 1     | NAFNCTFEY  | 155   | 163  | 9              | HLA-A*02:01 | 155           | 26             | 26        | 14194.16992 | 26  | 15839.69 | 27  | 3.38E-05     | 2   | 26   | TRUE |            |               |               |        |         |             |       |
| 1     | NLLQVGSF   | 733   | 741  | 9              | HLA-A*02:01 | 733           | 26             | 26        | 14558.27772 | 27  | 12869.44 | 23  | 0.00062951   | 26  | 26   | TRUE |            |               |               |        |         |             |       |
| 1     | IAGLIAIVM  | 1203  | 1211 | 9              | HLA-A*02:01 | 1203          | 26             | 26        | 15953.38527 | 30  | 9186.67  | 18  | 0.00062402   | 26  | 26   | TRUE |            |               |               |        |         |             |       |
| 1     | KWPMVYVWG  | 1193  | 1201 | 9              | HLA-A*02:01 | 1193          | 27             | 27        | 4416.823044 | 17  | 15755.43 | 27  | 0.0016734    | 46  | 27   | TRUE |            |               |               |        |         |             |       |
| 1     | SLQTYVYQQ  | 985   | 993  | 9              | HLA-A*02:01 | 985           | 27             | 27        | 6167.511855 | 19  | 15487.54 | 27  | 0.00128145   | 40  | 27   | TRUE |            |               |               |        |         |             |       |
| 1     | STAIHQDL   | 607   | 615  | 9              | HLA-A*02:01 | 607           | 27             | 27        | 6888.367433 | 20  | 15277.66 | 27  | 0.00050301   | 71  | 27   | TRUE |            |               |               |        |         |             |       |
| 1     | EIDKQIYT   | 294   | 302  | 9              | HLA-A*02:01 | 294           | 27             | 27        | 11671.0519  | 25  | 20874.11 | 35  | 0.00068077   | 27  | 27   | TRUE |            |               |               |        |         |             |       |
| 1     | ITTEVMPVS  | 704   | 712  | 9              | HLA-A*02:01 | 704           | 27             | 27        | 13338.59235 | 26  | 15266.09 | 27  | 0.00167494   | 46  | 27   | TRUE |            |               |               |        |         |             |       |
| 1     | VTQNVLYEN  | 893   | 901  | 9              | HLA-A*02:01 | 893           | 27             | 27        | 14591.83802 | 27  | 23365.3  | 40  | 0.00041419   | 20  | 27   | TRUE |            |               |               |        |         |             |       |
| 1     | DLPFPYSN   | 57    | 65   | 9              | HLA-A*02:01 | 57            | 27             | 27        | 15000.6473  | 27  | 15671.27 | 27  | 7.93E-05     | 4.6 | 27   | TRUE |            |               |               |        |         |             |       |
| 1     | RNFTTAPAI  | 1055  | 1063 | 9              | HLA-A*02:01 | 1055          | 27             | 27        | 15174.34661 | 27  | 20541.18 | 35  | 0.00042638   | 20  | 27   | TRUE |            |               |               |        |         |             |       |
| 1     | GADSSIAYS  | 682   | 690  | 9              | HLA-A*02:01 | 682           | 27             | 27        | 15209.32709 | 27  | 17677.38 | 30  | 0.00030283   | 16  | 27   | TRUE |            |               |               |        |         |             |       |
| 1     | ISGINASV   | 1151  | 1159 | 9              | HLA-A*02:01 | 1151          | 27             | 27        | 15350.05727 | 27  | 16723.28 | 29  | 0.00043934   | 21  | 27   | TRUE |            |               |               |        |         |             |       |
| 1     | FPSVYAWER  | 334   | 342  | 9              | HLA-A*02:01 | 334           | 27             | 27        | 15635.43614 | 27  | 25390.08 | 44  | 0.00029854   | 16  | 27   | TRUE |            |               |               |        |         |             |       |
| 1     | TLVKQLSSN  | 943   | 951  | 9              | HLA-A*02:01 | 943           | 27             | 27        | 15707.60603 | 27  | 28337    | 51  | 0.00051665   | 23  | 27   | TRUE |            |               |               |        |         |             |       |
| 1     | IINNTYD    | 1114  | 1122 | 9              | HLA-A*02:01 | 1114          | 27             | 27        | 15889.49154 | 27  | 21192.48 | 36  | 0.0006311    | 26  | 27   | TRUE |            |               |               |        |         |             |       |
| 1     | ACKVQMYKT  | 765   | 773  | 9              | HLA-A*02:01 | 765           | 28             | 28        | 585.925901  | 19  | 16403.57 | 28  | 0.0031989    | 61  | 28   | TRUE |            |               |               |        |         |             |       |
| 1     | NICKIDRL   | 1160  | 1168 | 9              | HLA-A*02:01 | 1160          | 28             | 28        | 6593.408748 | 20  | 15911.67 | 28  | 0.00432514   | 67  | 28   | TRUE |            |               |               |        |         |             |       |
| 1     | STSKSIVA   | 676   | 684  | 9              | HLA-A*02:01 | 676           | 28             | 28        | 8205.593529 | 26  | 1613.6   | 28  | 0.00466004   | 69  | 28   | TRUE |            |               |               |        |         |             |       |
| 1     | VTQQLIRAA  | 990   | 998  | 9              | HLA-A*02:01 | 990           | 28             | 28        | 10141.68226 | 23  | 16105.66 | 28  | 0.00378443   | 64  | 28   | TRUE |            |               |               |        |         |             |       |
| 1     | EIDIDSPCS  | 569   | 577  | 9              | HLA-A*02:01 | 569           | 28             | 28        | 18689.8025  | 28  | 24271.04 | 42  | 0.00064565   | 26  | 28   | TRUE |            |               |               |        |         |             |       |
| 1     | INHTFGNPV  | 72    | 80   | 9              | HLA-A*02:01 | 72            | 28             | 28        | 17025.89693 | 28  | 16426.31 | 28  | 0.00036627   | 18  | 28   | TRUE |            |               |               |        |         |             |       |
| 1     | VVLSEFLLN  | 497   | 505  | 9              | HLA-A*02:01 | 497           | 28             | 28        | 17262.75075 | 28  | 19418.86 | 33  | 0.00024957   | 14  | 28   | TRUE |            |               |               |        |         |             |       |
| 1     | SNVYADSFV  | 380   | 388  | 9              | HLA-A*02:01 | 380           | 28             | 28        | 17302.5455  | 28  | 24017.38 | 41  | 0.00027784   | 15  | 28   | TRUE |            |               |               |        |         |             |       |
| 1     | YSNVGTGHT  | 63    | 71   | 9              | HLA-A*02:01 | 63            | 28             | 28        | 17302.5455  | 28  | 16241.45 | 28  | 0.01643615</ |     |      |      |            |               |               |        |         |             |       |







| seq # | peptide    | start | end  | peptide length | allele      | peptide index | median binding | consensus | perc     | smm | IC50     | smm      | percentil   | ann | IC50 | ann  | percentile | comblib | sidne | comblib | sidne | legacy | consent | percentiles | equal |
|-------|------------|-------|------|----------------|-------------|---------------|----------------|-----------|----------|-----|----------|----------|-------------|-----|------|------|------------|---------|-------|---------|-------|--------|---------|-------------|-------|
| 1     | NASVNIQK   | 1155  | 1163 | 9              | HLA-A*02:01 | 1155          | 56             | 56        | 5.19E+05 | 68  | 30371.75 | 5.60E+01 | 0.00203939  | 50  | 56   | TRUE |            |         |       |         |       |        |         |             |       |
| 1     | FQFGGRDVS  | 548   | 556  | 9              | HLA-A*02:01 | 548           | 57             | 57        | 4.15E+04 | 38  | 30674.57 | 5.70E+01 | 0.00317687  | 60  | 57   | TRUE |            |         |       |         |       |        |         |             |       |
| 1     | GDSTECANL  | 726   | 734  | 9              | HLA-A*02:01 | 726           | 57             | 57        | 4.28E+04 | 38  | 30559.64 | 5.70E+01 | 0.017354016 | 93  | 57   | TRUE |            |         |       |         |       |        |         |             |       |
| 1     | KFDEDDSEP  | 1237  | 1245 | 9              | HLA-A*02:01 | 1237          | 57             | 57        | 6.40E+04 | 43  | 38805.6  | 8.40E+01 | 0.00271019  | 57  | 57   | TRUE |            |         |       |         |       |        |         |             |       |
| 1     | NTLVQLQSS  | 942   | 950  | 9              | HLA-A*02:01 | 942           | 57             | 57        | 9.19E+04 | 47  | 30731.04 | 5.70E+01 | 0.00360579  | 63  | 57   | TRUE |            |         |       |         |       |        |         |             |       |
| 1     | SPVDGLDQI  | 1131  | 1131 | 9              | HLA-A*02:01 | 1131          | 57             | 57        | 1.15E+05 | 50  | 30717.37 | 5.70E+01 | 0.00406419  | 76  | 57   | TRUE |            |         |       |         |       |        |         |             |       |
| 1     | LGDINARDL  | 823   | 831  | 9              | HLA-A*02:01 | 823           | 57             | 57        | 1.79E+05 | 55  | 30499.51 | 5.70E+01 | 0.00506991  | 71  | 57   | TRUE |            |         |       |         |       |        |         |             |       |
| 1     | LVQLQSSNF  | 944   | 952  | 9              | HLA-A*02:01 | 944           | 57             | 57        | 2.00E+05 | 57  | 29725.11 | 5.50E+01 | 0.010185914 | 85  | 57   | TRUE |            |         |       |         |       |        |         |             |       |
| 1     | VPSGDVVRF  | 308   | 316  | 9              | HLA-A*02:01 | 308           | 57             | 57        | 2.04E+05 | 57  | 29967.95 | 5.50E+01 | 0.0051357   | 71  | 57   | TRUE |            |         |       |         |       |        |         |             |       |
| 1     | REGVFFVNG  | 1073  | 1081 | 9              | HLA-A*02:01 | 1073          | 57             | 57        | 2.04E+05 | 57  | 25500.48 | 4.40E+01 | 0.00371535  | 64  | 57   | TRUE |            |         |       |         |       |        |         |             |       |
| 1     | LSSNFGAIS  | 948   | 956  | 9              | HLA-A*02:01 | 948           | 57             | 57        | 2.06E+05 | 57  | 29264.61 | 5.30E+01 | 0.011397248 | 87  | 57   | TRUE |            |         |       |         |       |        |         |             |       |
| 1     | GKGYHLMFS  | 1026  | 1034 | 9              | HLA-A*02:01 | 1026          | 57             | 57        | 2.07E+05 | 57  | 28695.83 | 5.20E+01 | 0.00885116  | 83  | 57   | TRUE |            |         |       |         |       |        |         |             |       |
| 1     | HTLMIFDNA  | 148   | 156  | 9              | HLA-A*02:01 | 148           | 57             | 57        | 2.09E+05 | 57  | 29252.59 | 5.30E+01 | 0.023680998 | 96  | 57   | TRUE |            |         |       |         |       |        |         |             |       |
| 1     | ISITTEVMP  | 702   | 710  | 9              | HLA-A*02:01 | 702           | 57             | 57        | 2.10E+05 | 57  | 29481.03 | 5.40E+01 | 0.00361327  | 63  | 57   | TRUE |            |         |       |         |       |        |         |             |       |
| 1     | QAAPHGVSF  | 1036  | 1044 | 9              | HLA-A*02:01 | 1036          | 57             | 57        | 2.13E+05 | 57  | 30725.73 | 5.70E+01 | 0.00668652  | 77  | 57   | TRUE |            |         |       |         |       |        |         |             |       |
| 1     | GFNFSQILP  | 781   | 789  | 9              | HLA-A*02:01 | 781           | 57             | 57        | 2.13E+05 | 57  | 33147.55 | 6.50E+01 | 0.00187932  | 49  | 57   | TRUE |            |         |       |         |       |        |         |             |       |
| 1     | KPTLKYFG   | 772   | 780  | 9              | HLA-A*02:01 | 772           | 58             | 58        | 2.81E+04 | 33  | 30942.92 | 5.80E+01 | 0.00331131  | 61  | 58   | TRUE |            |         |       |         |       |        |         |             |       |
| 1     | VYPSQERNF  | 1049  | 1057 | 9              | HLA-A*02:01 | 1049          | 58             | 58        | 6.04E+04 | 42  | 32175.1  | 6.20E+01 | 0.00288403  | 58  | 58   | TRUE |            |         |       |         |       |        |         |             |       |
| 1     | GYTDAVDC   | 270   | 278  | 9              | HLA-A*02:01 | 270           | 58             | 58        | 6.86E+04 | 43  | 39963.34 | 5.80E+01 | 0.00755614  | 80  | 58   | TRUE |            |         |       |         |       |        |         |             |       |
| 1     | IGAEHVDTY  | 637   | 645  | 9              | HLA-A*02:01 | 637           | 58             | 58        | 8.07E+04 | 55  | 34878.31 | 7.00E+01 | 0.00073792  | 58  | 58   | TRUE |            |         |       |         |       |        |         |             |       |
| 1     | CAQWNGILT  | 833   | 841  | 9              | HLA-A*02:01 | 833           | 58             | 58        | 1.11E+05 | 50  | 30773.64 | 5.80E+01 | 0.00618301  | 76  | 58   | TRUE |            |         |       |         |       |        |         |             |       |
| 1     | POITTDNT   | 1094  | 1102 | 9              | HLA-A*02:01 | 1094          | 58             | 58        | 1.55E+05 | 53  | 35048.16 | 7.10E+01 | 0.00283009  | 58  | 58   | TRUE |            |         |       |         |       |        |         |             |       |
| 1     | YNYKLPDDF  | 408   | 416  | 9              | HLA-A*02:01 | 408           | 58             | 58        | 1.84E+05 | 56  | 30823.62 | 5.80E+01 | 0.00446478  | 68  | 58   | TRUE |            |         |       |         |       |        |         |             |       |
| 1     | LFNKVTLAD  | 804   | 812  | 9              | HLA-A*02:01 | 804           | 58             | 58        | 1.96E+05 | 56  | 31058.64 | 5.80E+01 | 0.00345939  | 62  | 58   | TRUE |            |         |       |         |       |        |         |             |       |
| 1     | YFKNHTSPD  | 1137  | 1145 | 9              | HLA-A*02:01 | 1137          | 58             | 58        | 2.14E+05 | 58  | 43067.3  | 9.70E+01 | 0.00021727  | 13  | 58   | TRUE |            |         |       |         |       |        |         |             |       |
| 1     | SYHTVSLR   | 659   | 667  | 9              | HLA-A*02:01 | 659           | 58             | 58        | 2.18E+05 | 58  | 26881.06 | 4.70E+01 | 0.01864661  | 94  | 58   | TRUE |            |         |       |         |       |        |         |             |       |
| 1     | GACSCGSCC  | 1228  | 1236 | 9              | HLA-A*02:01 | 1228          | 58             | 58        | 2.18E+05 | 58  | 33435.36 | 6.60E+01 | 0.00116011  | 37  | 58   | TRUE |            |         |       |         |       |        |         |             |       |
| 1     | VTGFGHTNH  | 66    | 74   | 9              | HLA-A*02:01 | 66            | 58             | 58        | 2.21E+05 | 58  | 32399.62 | 6.50E+01 | 0.00120282  | 38  | 58   | TRUE |            |         |       |         |       |        |         |             |       |
| 1     | TTAPAICHE  | 1058  | 1066 | 9              | HLA-A*02:01 | 1058          | 58             | 58        | 2.25E+05 | 58  | 33724.55 | 6.70E+01 | 0.00093325  | 33  | 58   | TRUE |            |         |       |         |       |        |         |             |       |
| 1     | FDDVQAPNY  | 22    | 30   | 9              | HLA-A*02:01 | 22            | 58             | 58        | 2.30E+05 | 58  | 34126.86 | 6.80E+01 | 0.00020249  | 12  | 58   | TRUE |            |         |       |         |       |        |         |             |       |
| 1     | NAPATVCGP  | 505   | 513  | 9              | HLA-A*02:01 | 505           | 58             | 58        | 2.30E+05 | 58  | 34149.03 | 6.80E+01 | 0.00264423  | 56  | 58   | TRUE |            |         |       |         |       |        |         |             |       |
| 1     | KGYTSTNF   | 297   | 305  | 9              | HLA-A*02:01 | 297           | 58             | 58        | 2.31E+05 | 58  | 36880.81 | 7.70E+01 | 0.00140281  | 42  | 58   | TRUE |            |         |       |         |       |        |         |             |       |
| 1     | GAGCASYH   | 653   | 661  | 9              | HLA-A*02:01 | 653           | 58             | 58        | 4.04E+05 | 65  | 30921.88 | 5.80E+01 | 0.00075753  | 59  | 58   | TRUE |            |         |       |         |       |        |         |             |       |
| 1     | PNMTNLCPF  | 317   | 325  | 9              | HLA-A*02:01 | 317           | 58             | 58        | 9.08E+05 | 75  | 30830.97 | 5.80E+01 | 0.00106316  | 36  | 58   | TRUE |            |         |       |         |       |        |         |             |       |
| 1     | LSRLDKVEA  | 963   | 971  | 9              | HLA-A*02:01 | 963           | 59             | 59        | 1.19E+05 | 51  | 31247.39 | 5.90E+01 | 0.01512864  | 91  | 59   | TRUE |            |         |       |         |       |        |         |             |       |
| 1     | AKTSDVDNM  | 714   | 722  | 9              | HLA-A*02:01 | 714           | 59             | 59        | 1.64E+05 | 54  | 31303.24 | 5.90E+01 | 0.00566239  | 74  | 59   | TRUE |            |         |       |         |       |        |         |             |       |
| 1     | AEKCSVKY   | 284   | 292  | 9              | HLA-A*02:01 | 284           | 59             | 59        | 2.04E+05 | 57  | 36000.57 | 7.40E+01 | 0.00303389  | 59  | 59   | TRUE |            |         |       |         |       |        |         |             |       |
| 1     | LKGCSCGSG  | 1226  | 1234 | 9              | HLA-A*02:01 | 1226          | 59             | 59        | 2.35E+05 | 59  | 36447.37 | 7.60E+01 | 0.00228034  | 53  | 59   | TRUE |            |         |       |         |       |        |         |             |       |
| 1     | PFGEVFNAT  | 324   | 332  | 9              | HLA-A*02:01 | 324           | 59             | 59        | 2.36E+05 | 59  | 31396.51 | 5.90E+01 | 0.0093261   | 84  | 59   | TRUE |            |         |       |         |       |        |         |             |       |
| 1     | YHTVSLRS   | 660   | 668  | 9              | HLA-A*02:01 | 660           | 59             | 59        | 2.38E+05 | 59  | 27108    | 4.80E+01 | 0.011492116 | 87  | 59   | TRUE |            |         |       |         |       |        |         |             |       |
| 1     | SWFITQRNF  | 1083  | 1091 | 9              | HLA-A*02:01 | 1083          | 59             | 59        | 2.44E+05 | 59  | 25376.08 | 4.40E+01 | 0.00694384  | 78  | 59   | TRUE |            |         |       |         |       |        |         |             |       |
| 1     | IRACNFELC  | 125   | 133  | 9              | HLA-A*02:01 | 125           | 59             | 59        | 2.46E+05 | 59  | 26460.33 | 4.60E+01 | 0.00450505  | 68  | 59   | TRUE |            |         |       |         |       |        |         |             |       |
| 1     | LDSFSCGFG  | 571   | 579  | 9              | HLA-A*02:01 | 571           | 59             | 59        | 2.51E+05 | 59  | 36413.86 | 7.60E+01 | 0.00035188  | 18  | 59   | TRUE |            |         |       |         |       |        |         |             |       |
| 1     | IGINNTVY   | 1112  | 1120 | 9              | HLA-A*02:01 | 1112          | 59             | 59        | 8.28E+05 | 74  | 30252.03 | 5.60E+01 | 0.00301301  | 59  | 59   | TRUE |            |         |       |         |       |        |         |             |       |
| 1     | LAATKMSEC  | 1006  | 1014 | 9              | HLA-A*02:01 | 1006          | 60             | 60        | 3.05E+04 | 34  | 31588.01 | 6.00E+01 | 0.00574778  | 74  | 60   | TRUE |            |         |       |         |       |        |         |             |       |
| 1     | VKGDDVRIQ  | 389   | 397  | 9              | HLA-A*02:01 | 389           | 60             | 60        | 3.45E+04 | 36  | 33393.06 | 6.50E+01 | 0.00306196  | 60  | 60   | TRUE |            |         |       |         |       |        |         |             |       |
| 1     | NYNYKYRYL  | 435   | 443  | 9              | HLA-A*02:01 | 435           | 60             | 60        | 4.87E+04 | 39  | 31686.25 | 6.00E+01 | 0.018758582 | 94  | 60   | TRUE |            |         |       |         |       |        |         |             |       |
| 1     | YKRYRLRHG  | 438   | 446  | 9              | HLA-A*02:01 | 438           | 60             | 60        | 5.29E+04 | 40  | 31705.46 | 6.00E+01 | 0.00534564  | 72  | 60   | TRUE |            |         |       |         |       |        |         |             |       |
| 1     | TAIHADQLT  | 608   | 616  | 9              | HLA-A*02:01 | 608           | 60             | 60        | 7.55E+04 | 45  | 31619.13 | 6.00E+01 | 0.00338221  | 62  | 60   | TRUE |            |         |       |         |       |        |         |             |       |
| 1     | AFSLDVSSEK | 167   | 175  | 9              | HLA-A*02:01 | 167           | 60             | 60        | 2.54E+05 | 60  | 34479.82 | 6.90E+01 | 0.00156387  | 44  | 60   | TRUE |            |         |       |         |       |        |         |             |       |
| 1     | CDNPFVAVS  | 133   | 141  | 9              | HLA-A*02:01 | 133           | 60             | 60        | 2.54E+05 | 60  | 29209.89 | 5.30E+01 | 0.00573324  | 74  | 60   | TRUE |            |         |       |         |       |        |         |             |       |
| 1     | DGPKCTPPA  | 463   | 471  | 9              | HLA-A*02:01 | 463           | 60             | 60        | 2.56E+05 | 60  | 37845.47 | 8.10E+01 | 2.22E-05    | 1.4 | 60   | TRUE |            |         |       |         |       |        |         |             |       |
| 1     | RNIDATSTG  | 426   | 434  | 9              | HLA-A*02:01 | 426           | 60             | 60        | 2.57E+05 | 60  | 41642.68 | 9.30E+01 | 0.00018698  | 10  | 60   | TRUE |            |         |       |         |       |        |         |             |       |
| 1     | CTPPALNCY  | 467   | 475  | 9              | HLA-A*02:01 | 467           | 60             | 60        | 2.58E+05 | 60  | 28741.21 | 5.20E+01 | 0.00381944  | 65  | 60   | TRUE |            |         |       |         |       |        |         |             |       |
| 1     | ASANLAATK  | 1002  | 1010 | 9              | HLA-A*02:01 | 1002          | 60             | 60        | 2.61E+05 | 60  | 32658.41 | 6.30E+01 | 0.00114578  | 37  | 60   | TRUE |            |         |       |         |       |        |         |             |       |
| 1     | TPPALNCYW  | 468   | 476  | 9              | HLA-A*02:01 | 468           | 60             | 60        | 2.61E+05 | 60  | 33304.3  | 6.50E+01 | 0.00123396  | 39  | 60   | TRUE |            |         |       |         |       |        |         |             |       |
| 1     | VVFVNGTSW  | 1076  | 1084 | 9              | HLA-A*02:01 | 1076          | 60             | 60        | 2.70E+05 | 60  | 30048.8  | 5.50E+01 | 0.016542456 | 92  | 60   | TRUE |            |         |       |         |       |        |         |             |       |
| 1     | KYAEAEVQI  | 967   | 975  | 9              | HLA-A*02:01 | 967           | 60             | 60        | 2.72E+05 | 60  | 36658.16 | 7.70E+01 | 0.00114868  | 37  | 60   | TRUE |            |         |       |         |       |        |         |             |       |
| 1     | LOELGVREQ  | 1162  | 1170 | 9              | HLA-A*02:01 | 1162          | 60             | 60        | 2.74E+05 | 60  | 35339.09 | 7.20E+01 | 0.00203264  | 50  | 60   | TRUE |            |         |       |         |       |        |         |             |       |
| 1     | TFMLKRYEN  | 261   | 269  | 9              | HLA-A*02:01 | 261           | 60             | 60        | 2.74E+05 | 62  | 40041.85 | 8.80E+01 | 0.00185823  | 48  | 60   | TRUE |            |         |       |         |       |        |         |             |       |
| 1     | TFSTFKCY   | 359   | 367  | 9              | HLA-A*02:01 | 359           | 60             | 60        | 6.31E+05 | 71  | 27791.96 | 4.80E+01 | 0.00308248  | 60  | 60   | TRUE |            |         |       |         |       |        |         |             |       |
| 1     | NGTSWFITQ  | 1080  | 1088 | 9              | HLA-A*02:01 | 1080          | 60             | 60        | 7.76E+05 | 73  | 31278.1  | 6.00E+01 | 0.00066328  | 27  | 60   | TRUE |            |         |       |         |       |        |         |             |       |
| 1     | SSEVALVYQ  | 591   | 599  | 9              | HLA-A*02:01 | 591           | 60             | 60        | 9.55E+05 | 76  | 25490.27 | 4.40E+01 | 0.00317322  | 60  | 60   | TRUE |            |         |       |         |       |        |         |             |       |

| seq # | peptide    | start | end  | peptide length | allele      | peptide index | median binding | consensus | perc     | mm | IC50     | mm       | percentil   | ann | IC50 | ann    | percentile | comblib | sidene | comblib | sidene | legacy | consent | percentiles | equal |
|-------|------------|-------|------|----------------|-------------|---------------|----------------|-----------|----------|----|----------|----------|-------------|-----|------|--------|------------|---------|--------|---------|--------|--------|---------|-------------|-------|
| 1     | DINARDLIC  | 825   | 833  | 9              | HLA-A*02:01 | 825           | 65             | 65        | 3.92E+05 | 65 | 32828.11 | 6.40E+01 | 0.010197648 | 85  | 65   | TRUE   |            |         |        |         |        |        |         |             |       |
| 1     | EAEVDIQL   | 970   | 978  | 9              | HLA-A*02:01 | 970           | 65             | 65        | 3.96E+05 | 65 | 31976.93 | 6.10E+01 | 0.012195511 | 88  | 65   | TRUE   |            |         |        |         |        |        |         |             |       |
| 1     | MKQYGECLG  | 816   | 824  | 9              | HLA-A*02:01 | 816           | 65             | 65        | 3.98E+05 | 65 | 39183.83 | 8.60E+01 | 0.00316228  | 60  | 65   | TRUE   |            |         |        |         |        |        |         |             |       |
| 1     | CSGSCCKF   | 1230  | 1238 | 9              | HLA-A*02:01 | 1230          | 65             | 65        | 3.99E+05 | 65 | 26097.54 | 4.60E+01 | 0.011086641 | 87  | 65   | TRUE   |            |         |        |         |        |        |         |             |       |
| 1     | CTGLNRALS  | 742   | 750  | 9              | HLA-A*02:01 | 742           | 65             | 65        | 4.01E+05 | 65 | 30813.62 | 5.80E+01 | 0.00816582  | 81  | 65   | TRUE   |            |         |        |         |        |        |         |             |       |
| 1     | YQENITD    | 265   | 274  | 9              | HLA-A*02:01 | 265           | 65             | 65        | 4.03E+05 | 65 | 39298.04 | 8.90E+01 | 0.00030796  | 16  | 65   | TRUE   |            |         |        |         |        |        |         |             |       |
| 1     | KVEAVQID   | 968   | 976  | 9              | HLA-A*02:01 | 968           | 65             | 65        | 4.07E+05 | 65 | 37782.04 | 8.10E+01 | 0.00141286  | 42  | 65   | TRUE   |            |         |        |         |        |        |         |             |       |
| 1     | CTDVSIAH   | 603   | 611  | 9              | HLA-A*02:01 | 603           | 65             | 65        | 4.37E+05 | 66 | 31564.1  | 6.00E+01 | 0.00394639  | 65  | 65   | TRUE   |            |         |        |         |        |        |         |             |       |
| 1     | YTOHTSSMR  | 30    | 38   | 9              | HLA-A*02:01 | 30            | 66             | 66        | 5.13E+04 | 40 | 33660.41 | 6.60E+01 | 0.019971009 | 94  | 66   | TRUE   |            |         |        |         |        |        |         |             |       |
| 1     | IAEQDRNT   | 752   | 760  | 9              | HLA-A*02:01 | 752           | 66             | 66        | 6.58E+04 | 43 | 33599.64 | 6.60E+01 | 0.016641789 | 92  | 66   | TRUE   |            |         |        |         |        |        |         |             |       |
| 1     | GFMKQYGE   | 814   | 822  | 9              | HLA-A*02:01 | 814           | 66             | 66        | 8.79E+04 | 46 | 39736.73 | 8.70E+01 | 0.00400129  | 66  | 66   | TRUE   |            |         |        |         |        |        |         |             |       |
| 1     | QTGVADYN   | 401   | 409  | 9              | HLA-A*02:01 | 401           | 66             | 66        | 4.07E+05 | 65 | 33446.57 | 6.60E+01 | 0.00619726  | 76  | 66   | TRUE   |            |         |        |         |        |        |         |             |       |
| 1     | KFPSVYAVE  | 333   | 341  | 9              | HLA-A*02:01 | 333           | 66             | 66        | 4.25E+05 | 66 | 32617.81 | 6.30E+01 | 0.00503385  | 71  | 66   | TRUE   |            |         |        |         |        |        |         |             |       |
| 1     | LPSGFNTLK  | 209   | 217  | 9              | HLA-A*02:01 | 209           | 66             | 66        | 4.30E+05 | 66 | 35029.59 | 7.10E+01 | 0.00389852  | 65  | 66   | TRUE   |            |         |        |         |        |        |         |             |       |
| 1     | KDGLFLVYK  | 190   | 198  | 9              | HLA-A*02:01 | 190           | 66             | 66        | 4.44E+05 | 66 | 29404.59 | 5.40E+01 | 0.01344931  | 90  | 66   | TRUE   |            |         |        |         |        |        |         |             |       |
| 1     | VVRFPNITN  | 313   | 321  | 9              | HLA-A*02:01 | 313           | 66             | 66        | 4.44E+05 | 66 | 33879.26 | 6.70E+01 | 0.00228139  | 53  | 66   | TRUE   |            |         |        |         |        |        |         |             |       |
| 1     | FNGIGVTQN  | 888   | 896  | 9              | HLA-A*02:01 | 888           | 66             | 66        | 4.45E+05 | 66 | 35277.95 | 7.20E+01 | 0.00138995  | 42  | 66   | TRUE   |            |         |        |         |        |        |         |             |       |
| 1     | GFYTTGTG   | 482   | 490  | 9              | HLA-A*02:01 | 482           | 66             | 66        | 4.45E+05 | 66 | 36178.62 | 7.50E+01 | 0.00274757  | 53  | 66   | TRUE   |            |         |        |         |        |        |         |             |       |
| 1     | APATVCGPK  | 506   | 514  | 9              | HLA-A*02:01 | 506           | 66             | 66        | 8.36E+05 | 74 | 33500.89 | 6.60E+01 | 0.00242605  | 54  | 66   | TRUE   |            |         |        |         |        |        |         |             |       |
| 1     | VFAQYQOMY  | 763   | 771  | 9              | HLA-A*02:01 | 763           | 66             | 66        | 8.77E+05 | 75 | 30172.6  | 5.60E+01 | 0.00411055  | 66  | 66   | TRUE   |            |         |        |         |        |        |         |             |       |
| 1     | TGVADYNY   | 402   | 410  | 9              | HLA-A*02:01 | 402           | 66             | 66        | 1.77E+06 | 82 | 32654.88 | 6.30E+01 | 0.00402717  | 66  | 66   | TRUE   |            |         |        |         |        |        |         |             |       |
| 1     | LNESLDLQ   | 1175  | 1183 | 9              | HLA-A*02:01 | 1175          | 66             | 66        | 3.71E+06 | 89 | 33458.87 | 6.60E+01 | 0.00195209  | 49  | 66   | TRUE   |            |         |        |         |        |        |         |             |       |
| 1     | HTSPDVLG   | 1141  | 1149 | 9              | HLA-A*02:01 | 1141          | 67             | 67        | 8.51E+04 | 46 | 33753.4  | 6.70E+01 | 0.00435712  | 68  | 67   | TRUE   |            |         |        |         |        |        |         |             |       |
| 1     | RDPKTSIL   | 563   | 571  | 9              | HLA-A*02:01 | 563           | 67             | 67        | 1.14E+05 | 50 | 33810.05 | 6.70E+01 | 0.019787913 | 94  | 67   | TRUE   |            |         |        |         |        |        |         |             |       |
| 1     | DVNCTDVS   | 600   | 608  | 9              | HLA-A*02:01 | 600           | 67             | 67        | 1.50E+05 | 53 | 34025.48 | 6.70E+01 | 0.028131961 | 98  | 67   | TRUE   |            |         |        |         |        |        |         |             |       |
| 1     | RSDTLTYLQ  | 48    | 56   | 9              | HLA-A*02:01 | 48            | 67             | 67        | 4.46E+05 | 67 | 28777.91 | 5.20E+01 | 0.016768723 | 92  | 67   | TRUE   |            |         |        |         |        |        |         |             |       |
| 1     | QESLTTTST  | 917   | 925  | 9              | HLA-A*02:01 | 917           | 67             | 67        | 4.48E+05 | 67 | 37456.03 | 7.90E+01 | 0.00193197  | 49  | 67   | TRUE   |            |         |        |         |        |        |         |             |       |
| 1     | YENQKQIAN  | 899   | 907  | 9              | HLA-A*02:01 | 899           | 67             | 67        | 4.51E+05 | 67 | 39925.05 | 8.80E+01 | 0.00127997  | 40  | 67   | TRUE   |            |         |        |         |        |        |         |             |       |
| 1     | AYFPREGVF  | 1069  | 1077 | 9              | HLA-A*02:01 | 1069          | 67             | 67        | 4.60E+05 | 67 | 33966.61 | 6.70E+01 | 0.00077304  | 30  | 67   | TRUE   |            |         |        |         |        |        |         |             |       |
| 1     | ERNFTTAPA  | 1054  | 1062 | 9              | HLA-A*02:01 | 1054          | 67             | 67        | 4.68E+05 | 67 | 34164.18 | 6.80E+01 | 0.00066589  | 27  | 67   | TRUE   |            |         |        |         |        |        |         |             |       |
| 1     | ATVCGPKLS  | 508   | 516  | 9              | HLA-A*02:01 | 508           | 68             | 68        | 1.21E+05 | 51 | 34335.76 | 6.80E+01 | 0.02471724  | 96  | 68   | TRUE   |            |         |        |         |        |        |         |             |       |
| 1     | TONHTSSMRG | 31    | 39   | 9              | HLA-A*02:01 | 31            | 68             | 68        | 1.22E+05 | 51 | 34306.04 | 6.80E+01 | 0.00535316  | 94  | 68   | TRUE   |            |         |        |         |        |        |         |             |       |
| 1     | SYEDWPG    | 645   | 653  | 9              | HLA-A*02:01 | 645           | 68             | 68        | 3.57E+05 | 64 | 37442.6  | 7.90E+01 | 0.00453064  | 68  | 68   | TRUE   |            |         |        |         |        |        |         |             |       |
| 1     | SGNCDVIG   | 1105  | 1113 | 9              | HLA-A*02:01 | 1105          | 68             | 68        | 3.79E+05 | 65 | 34084.8  | 6.80E+01 | 0.020941125 | 95  | 68   | TRUE   |            |         |        |         |        |        |         |             |       |
| 1     | TTTSLALGK  | 921   | 929  | 9              | HLA-A*02:01 | 921           | 68             | 68        | 4.97E+05 | 68 | 35298.57 | 7.20E+01 | 0.00127732  | 39  | 68   | TRUE   |            |         |        |         |        |        |         |             |       |
| 1     | NTRNIDATS  | 424   | 432  | 9              | HLA-A*02:01 | 424           | 68             | 68        | 5.14E+05 | 68 | 33778.62 | 6.70E+01 | 0.00866962  | 82  | 68   | TRUE   |            |         |        |         |        |        |         |             |       |
| 1     | FHTINTHFG  | 69    | 77   | 9              | HLA-A*02:01 | 69            | 68             | 68        | 5.38E+05 | 68 | 37507.51 | 8.00E+01 | 0.00093411  | 33  | 68   | TRUE   |            |         |        |         |        |        |         |             |       |
| 1     | WPLNDYGFY  | 476   | 484  | 9              | HLA-A*02:01 | 476           | 68             | 68        | 6.70E+05 | 72 | 34113.21 | 6.80E+01 | 0.00207778  | 51  | 68   | TRUE   |            |         |        |         |        |        |         |             |       |
| 1     | TREVFQAVK  | 760   | 768  | 9              | HLA-A*02:01 | 760           | 68             | 68        | 3.69E+07 | 99 | 34335.01 | 6.80E+01 | 0.00412762  | 66  | 68   | TRUE   |            |         |        |         |        |        |         |             |       |
| 1     | VQAPNNTQH  | 25    | 33   | 9              | HLA-A*02:01 | 25            | 69             | 69        | 1.09E+05 | 49 | 37120.35 | 7.80E+01 | 0.0046366   | 69  | 69   | TRUE   |            |         |        |         |        |        |         |             |       |
| 1     | GNNVFQTAH  | 625   | 633  | 9              | HLA-A*02:01 | 625           | 69             | 69        | 1.40E+05 | 52 | 34511.19 | 6.90E+01 | 0.010834279 | 86  | 69   | TRUE   |            |         |        |         |        |        |         |             |       |
| 1     | GSLDRLCT   | 13    | 21   | 9              | HLA-A*02:01 | 13            | 69             | 69        | 2.35E+05 | 59 | 34475.35 | 6.90E+01 | 0.00926559  | 85  | 69   | TRUE   |            |         |        |         |        |        |         |             |       |
| 1     | TSGSDLRD   | 11    | 19   | 9              | HLA-A*02:01 | 11            | 69             | 69        | 3.24E+05 | 63 | 37324.12 | 7.90E+01 | 0.00461424  | 69  | 69   | TRUE   |            |         |        |         |        |        |         |             |       |
| 1     | IQEIDRLN   | 1161  | 1169 | 9              | HLA-A*02:01 | 1161          | 69             | 69        | 3.30E+05 | 63 | 34496.25 | 6.90E+01 | 0.013464803 | 90  | 69   | TRUE   |            |         |        |         |        |        |         |             |       |
| 1     | DEIRSDTL   | 44    | 52   | 9              | HLA-A*02:01 | 44            | 69             | 69        | 3.32E+05 | 63 | 34545.54 | 6.90E+01 | 0.011277167 | 87  | 69   | TRUE   |            |         |        |         |        |        |         |             |       |
| 1     | NTSTSTFK   | 357   | 365  | 9              | HLA-A*02:01 | 357           | 69             | 69        | 5.24E+05 | 69 | 30580.14 | 5.70E+01 | 0.0078001   | 80  | 69   | TRUE   |            |         |        |         |        |        |         |             |       |
| 1     | TAGWTFGAG  | 865   | 873  | 9              | HLA-A*02:01 | 865           | 69             | 69        | 5.35E+05 | 69 | 33791.04 | 6.70E+01 | 0.014066952 | 90  | 69   | TRUE   |            |         |        |         |        |        |         |             |       |
| 1     | SGTATAGWT  | 861   | 869  | 9              | HLA-A*02:01 | 861           | 69             | 69        | 5.30E+05 | 69 | 39380.62 | 8.60E+01 | 0.00243222  | 54  | 69   | TRUE   |            |         |        |         |        |        |         |             |       |
| 1     | HEGKAYFPR  | 1065  | 1073 | 9              | HLA-A*02:01 | 1065          | 69             | 69        | 5.36E+05 | 69 | 36465.12 | 7.60E+01 | 0.00184332  | 48  | 69   | TRUE   |            |         |        |         |        |        |         |             |       |
| 1     | TSKSQVAY   | 669   | 677  | 9              | HLA-A*02:01 | 669           | 69             | 69        | 5.36E+05 | 69 | 29996.51 | 5.50E+01 | 0.00581835  | 74  | 69   | TRUE   |            |         |        |         |        |        |         |             |       |
| 1     | AGFMQKYGE  | 813   | 821  | 9              | HLA-A*02:01 | 813           | 69             | 69        | 5.46E+05 | 69 | 36696.27 | 7.70E+01 | 0.00072946  | 29  | 69   | TRUE   |            |         |        |         |        |        |         |             |       |
| 1     | EHVDTSYEC  | 640   | 648  | 9              | HLA-A*02:01 | 640           | 69             | 69        | 5.46E+05 | 69 | 42120.14 | 9.20E+01 | 0.00097432  | 34  | 69   | TRUE   |            |         |        |         |        |        |         |             |       |
| 1     | LNRLAISGIA | 745   | 753  | 9              | HLA-A*02:01 | 745           | 69             | 69        | 5.51E+05 | 69 | 33798.71 | 6.70E+01 | 0.01544543  | 92  | 69   | TRUE   |            |         |        |         |        |        |         |             |       |
| 1     | YGVSATKLN  | 367   | 375  | 9              | HLA-A*02:01 | 367           | 69             | 69        | 5.55E+05 | 69 | 40452.95 | 9.00E+01 | 0.0007034   | 28  | 69   | TRUE   |            |         |        |         |        |        |         |             |       |
| 1     | LCMTSCSCS  | 1216  | 1224 | 9              | HLA-A*02:01 | 1216          | 69             | 69        | 5.61E+05 | 69 | 26320.99 | 4.60E+01 | 0.03948208  | 99  | 69   | TRUE   |            |         |        |         |        |        |         |             |       |
| 1     | NVLVENQKQ  | 896   | 904  | 9              | HLA-A*02:01 | 896           | 69             | 69        | 5.64E+05 | 69 | 41995.6  | 9.40E+01 | 0.00142135  | 42  | 69   | TRUE   |            |         |        |         |        |        |         |             |       |
| 1     | VSLRLSTSQ  | 663   | 671  | 9              | HLA-A*02:01 | 663           | 69             | 69        | 5.85E+05 | 70 | 34169.36 | 6.80E+01 | 0.00463981  | 69  | 69   | TRUE   |            |         |        |         |        |        |         |             |       |
| 1     | IDQLGKY    | 1180  | 1188 | 9              | HLA-A*02:01 | 1180          | 69             | 69        | 1.59E+06 | 81 | 34397.11 | 6.90E+01 | 0.00385834  | 65  | 69   | TRUE   |            |         |        |         |        |        |         |             |       |
| 1     | SATRLNDLC  | 370   | 378  | 9              | HLA-A*02:01 | 370           | 70             | 70        | 1.29E+05 | 51 | 34697.64 | 7.00E+01 | 0.00732528  | 80  | 70   | TRUE   |            |         |        |         |        |        |         |             |       |
| 1     | VLOGSKRYD  | 1015  | 1023 | 9              | HLA-A*02:01 | 1015          | 70             | 70        | 2.08E+05 | 64 | 39768.55 | 8.80E+01 | 0.00475445  | 75  | 70   | TRUE   |            |         |        |         |        |        |         |             |       |
| 1     | TVSLRST    | 662   | 670  | 9              | HLA-A*02:01 | 662           | 70             | 70        | 2.14E+05 | 57 | 34758.52 | 7.00E+01 | 0.00602656  | 75  | 70   | TRUE   |            |         |        |         |        |        |         |             |       |
| 1     | GFNTLXRF   | 212   | 220  | 9              | HLA-A*02:01 | 212           | 70             | 70        | 3.19E+05 | 63 | 34840.97 | 7.00E+01 | 0.012103194 | 88  | 70   | TRUE</ |            |         |        |         |        |        |         |             |       |

| seq # | peptide    | start | end  | peptide length | allele      | peptide index | median binding | consensus | perc     | smm | IC50     | smm      | percentil   | ann | IC50 | ann  | percentile | comblib | sidene | comblib | sidene | legacy | consent | percentiles | equal |
|-------|------------|-------|------|----------------|-------------|---------------|----------------|-----------|----------|-----|----------|----------|-------------|-----|------|------|------------|---------|--------|---------|--------|--------|---------|-------------|-------|
| 1     | LCFPEVFN   | 322   | 330  | 9              | HLA-A*02:01 | 322           | 74             | 74        | 8.45E+05 | 74  | 36267.2  | 7.50E+01 | 0.00226778  | 53  | 74   | TRUE |            |         |        |         |        |        |         |             |       |
| 1     | LSTDINKQ   | 515   | 523  | 9              | HLA-A*02:01 | 515           | 74             | 74        | 8.45E+05 | 74  | 36267.2  | 7.50E+01 | 0.00366016  | 64  | 74   | TRUE |            |         |        |         |        |        |         |             |       |
| 1     | GLCVLANTR  | 418   | 426  | 9              | HLA-A*02:01 | 418           | 74             | 74        | 2.19E+06 | 85  | 26795.69 | 4.70E+01 | 0.00585868  | 74  | 74   | TRUE |            |         |        |         |        |        |         |             |       |
| 1     | ASVVNIQKE  | 1156  | 1164 | 9              | HLA-A*02:01 | 1156          | 74             | 74        | 2.96E+06 | 87  | 35861.37 | 7.40E+01 | 0.00174904  | 47  | 74   | TRUE |            |         |        |         |        |        |         |             |       |
| 1     | EKSNVVRGW  | 93    | 101  | 9              | HLA-A*02:01 | 93            | 74             | 74        | 3.67E+06 | 89  | 35969.43 | 7.40E+01 | 0.00359501  | 63  | 74   | TRUE |            |         |        |         |        |        |         |             |       |
| 1     | PTNFSIT    | 697   | 706  | 9              | HLA-A*02:01 | 697           | 75             | 75        | 2.90E+05 | 61  | 36309.17 | 7.50E+01 | 0.00619156  | 76  | 75   | TRUE |            |         |        |         |        |        |         |             |       |
| 1     | RWDSDFTS   | 553   | 561  | 9              | HLA-A*02:01 | 553           | 75             | 75        | 5.82E+05 | 70  | 40982.93 | 9.10E+01 | 0.00611505  | 75  | 75   | TRUE |            |         |        |         |        |        |         |             |       |
| 1     | NATKTPSYV  | 330   | 338  | 9              | HLA-A*02:01 | 330           | 75             | 75        | 8.53E+05 | 75  | 34201.53 | 6.80E+01 | 0.0099816   | 85  | 75   | TRUE |            |         |        |         |        |        |         |             |       |
| 1     | VYVKQPID   | 196   | 204  | 9              | HLA-A*02:01 | 196           | 75             | 75        | 8.55E+05 | 75  | 45094.44 | 1.00E+02 | 0.00330598  | 61  | 75   | TRUE |            |         |        |         |        |        |         |             |       |
| 1     | VKQLSSNFG  | 945   | 953  | 9              | HLA-A*02:01 | 945           | 75             | 75        | 8.67E+05 | 75  | 37601.39 | 8.00E+01 | 0.00337287  | 62  | 75   | TRUE |            |         |        |         |        |        |         |             |       |
| 1     | TFEYISDAF  | 160   | 168  | 9              | HLA-A*02:01 | 160           | 75             | 75        | 8.71E+05 | 75  | 29355.3  | 5.40E+01 | 0.03809781  | 99  | 75   | TRUE |            |         |        |         |        |        |         |             |       |
| 1     | LPDLPKPT   | 788   | 796  | 9              | HLA-A*02:01 | 788           | 75             | 75        | 8.81E+05 | 75  | 39216.92 | 8.60E+01 | 0.00129688  | 40  | 75   | TRUE |            |         |        |         |        |        |         |             |       |
| 1     | TFGAGAAQL  | 869   | 877  | 9              | HLA-A*02:01 | 869           | 75             | 75        | 8.83E+05 | 75  | 36119.96 | 7.50E+01 | 0.00170451  | 46  | 75   | TRUE |            |         |        |         |        |        |         |             |       |
| 1     | MPVSMAKTS  | 709   | 717  | 9              | HLA-A*02:01 | 709           | 75             | 75        | 8.96E+05 | 75  | 38075.89 | 8.20E+01 | 0.00029349  | 15  | 75   | TRUE |            |         |        |         |        |        |         |             |       |
| 1     | TDNTFVSGN  | 1099  | 1107 | 9              | HLA-A*02:01 | 1099          | 75             | 75        | 9.02E+05 | 75  | 39556.99 | 8.70E+01 | 0.00408884  | 66  | 75   | TRUE |            |         |        |         |        |        |         |             |       |
| 1     | SNVVRGVWF  | 95    | 103  | 9              | HLA-A*02:01 | 95            | 75             | 75        | 9.14E+05 | 75  | 23953.54 | 4.10E+01 | 0.01095973  | 87  | 75   | TRUE |            |         |        |         |        |        |         |             |       |
| 1     | GLQDDVNVQ  | 928   | 936  | 9              | HLA-A*02:01 | 928           | 75             | 75        | 9.16E+05 | 75  | 36571.8  | 7.60E+01 | 0.00279705  | 58  | 75   | TRUE |            |         |        |         |        |        |         |             |       |
| 1     | SCGSCOKF   | 1231  | 1239 | 9              | HLA-A*02:01 | 1231          | 75             | 75        | 1.47E+06 | 80  | 36094.95 | 7.50E+01 | 0.00661165  | 25  | 75   | TRUE |            |         |        |         |        |        |         |             |       |
| 1     | ELGSGINAR  | 821   | 829  | 9              | HLA-A*02:01 | 821           | 75             | 75        | 1.66E+06 | 82  | 36322.96 | 7.50E+01 | 0.00191337  | 49  | 75   | TRUE |            |         |        |         |        |        |         |             |       |
| 1     | QLKGIEQY   | 1183  | 1191 | 9              | HLA-A*02:01 | 1183          | 75             | 75        | 3.43E+06 | 88  | 35596.19 | 7.30E+01 | 0.00061174  | 75  | 75   | TRUE |            |         |        |         |        |        |         |             |       |
| 1     | KGACSGSC   | 1227  | 1235 | 9              | HLA-A*02:01 | 1227          | 76             | 76        | 2.52E+05 | 59  | 36522.36 | 7.60E+01 | 0.011649205 | 88  | 76   | TRUE |            |         |        |         |        |        |         |             |       |
| 1     | ITGRQLSQ   | 979   | 987  | 9              | HLA-A*02:01 | 979           | 76             | 76        | 5.12E+05 | 68  | 37757.54 | 8.00E+01 | 0.00619013  | 76  | 76   | TRUE |            |         |        |         |        |        |         |             |       |
| 1     | KYEYKIVK   | 1187  | 1195 | 9              | HLA-A*02:01 | 1187          | 76             | 76        | 5.31E+05 | 69  | 36506.96 | 7.60E+01 | 0.00618443  | 76  | 76   | TRUE |            |         |        |         |        |        |         |             |       |
| 1     | QDQNVCTDVS | 599   | 607  | 9              | HLA-A*02:01 | 599           | 76             | 76        | 9.31E+05 | 76  | 41627.37 | 9.30E+01 | 0.00056416  | 24  | 76   | TRUE |            |         |        |         |        |        |         |             |       |
| 1     | ANLAATKMS  | 1004  | 1012 | 9              | HLA-A*02:01 | 1004          | 76             | 76        | 9.31E+05 | 76  | 40136.84 | 8.90E+01 | 0.00053064  | 23  | 76   | TRUE |            |         |        |         |        |        |         |             |       |
| 1     | GDDVRQIAP  | 391   | 399  | 9              | HLA-A*02:01 | 391           | 76             | 76        | 9.33E+05 | 76  | 39282.3  | 8.60E+01 | 0.00130768  | 40  | 76   | TRUE |            |         |        |         |        |        |         |             |       |
| 1     | RFGNGVGTQ  | 887   | 895  | 9              | HLA-A*02:01 | 887           | 76             | 76        | 9.38E+05 | 76  | 30166.72 | 5.60E+01 | 0.01620317  | 92  | 76   | TRUE |            |         |        |         |        |        |         |             |       |
| 1     | DVQAPNYTQ  | 24    | 32   | 9              | HLA-A*02:01 | 24            | 76             | 76        | 9.38E+05 | 76  | 40000.72 | 8.80E+01 | 0.00055195  | 24  | 76   | TRUE |            |         |        |         |        |        |         |             |       |
| 1     | AICHEGKAY  | 1062  | 1070 | 9              | HLA-A*02:01 | 1062          | 76             | 76        | 9.42E+05 | 76  | 34617.76 | 6.90E+01 | 0.06309573  | 100 | 76   | TRUE |            |         |        |         |        |        |         |             |       |
| 1     | KNLNLSD    | 1173  | 1181 | 9              | HLA-A*02:01 | 1173          | 76             | 76        | 9.60E+05 | 76  | 40606.43 | 9.00E+01 | 0.00477419  | 70  | 76   | TRUE |            |         |        |         |        |        |         |             |       |
| 1     | PSGDDVRRF  | 309   | 317  | 9              | HLA-A*02:01 | 309           | 76             | 76        | 1.00E+06 | 76  | 37075.39 | 7.80E+01 | 0.00136364  | 41  | 76   | TRUE |            |         |        |         |        |        |         |             |       |
| 1     | EGVVFVNGT  | 1074  | 1082 | 9              | HLA-A*02:01 | 1074          | 76             | 76        | 1.02E+06 | 76  | 27622.96 | 4.90E+01 | 0.0097949   | 85  | 76   | TRUE |            |         |        |         |        |        |         |             |       |
| 1     | DIPGAGIC   | 649   | 657  | 9              | HLA-A*02:01 | 649           | 76             | 76        | 1.02E+06 | 76  | 34606    | 7.30E+01 | 0.02006781  | 94  | 76   | TRUE |            |         |        |         |        |        |         |             |       |
| 1     | APAIHEGK   | 1060  | 1068 | 9              | HLA-A*02:01 | 1060          | 76             | 76        | 2.09E+06 | 84  | 36488.79 | 7.60E+01 | 0.00184035  | 48  | 76   | TRUE |            |         |        |         |        |        |         |             |       |
| 1     | ECODIGAG   | 647   | 655  | 9              | HLA-A*02:01 | 647           | 76             | 76        | 1.56E+07 | 97  | 36205.64 | 7.50E+01 | 0.0062431   | 76  | 76   | TRUE |            |         |        |         |        |        |         |             |       |
| 1     | VAVLYQDVN  | 594   | 602  | 9              | HLA-A*02:01 | 594           | 77             | 77        | 3.10E+05 | 62  | 38756.29 | 8.40E+01 | 0.00665886  | 77  | 77   | TRUE |            |         |        |         |        |        |         |             |       |
| 1     | IADVNYKPL  | 405   | 413  | 9              | HLA-A*02:01 | 405           | 77             | 77        | 3.55E+05 | 64  | 36641.5  | 7.70E+01 | 0.017151417 | 93  | 77   | TRUE |            |         |        |         |        |        |         |             |       |
| 1     | EKSGNFKHL  | 174   | 182  | 9              | HLA-A*02:01 | 174           | 77             | 77        | 6.34E+05 | 71  | 36853.81 | 7.70E+01 | 0.01559966  | 92  | 77   | TRUE |            |         |        |         |        |        |         |             |       |
| 1     | PLKPTKRFS  | 791   | 799  | 9              | HLA-A*02:01 | 791           | 77             | 77        | 1.04E+06 | 77  | 36857.81 | 7.70E+01 | 0.00232702  | 53  | 77   | TRUE |            |         |        |         |        |        |         |             |       |
| 1     | PLVKLVKL   | 1245  | 1253 | 9              | HLA-A*02:01 | 1245          | 77             | 77        | 1.07E+06 | 77  | 39673.57 | 8.70E+01 | 0.00359749  | 63  | 77   | TRUE |            |         |        |         |        |        |         |             |       |
| 1     | TPTLKYFGG  | 773   | 781  | 9              | HLA-A*02:01 | 773           | 77             | 77        | 1.10E+06 | 77  | 36921.68 | 7.80E+01 | 0.00506524  | 71  | 77   | TRUE |            |         |        |         |        |        |         |             |       |
| 1     | ERKKSINCV  | 341   | 349  | 9              | HLA-A*02:01 | 341           | 77             | 77        | 1.31E+06 | 79  | 36918.09 | 7.70E+01 | 0.00352696  | 63  | 77   | TRUE |            |         |        |         |        |        |         |             |       |
| 1     | PPALNCYWP  | 469   | 477  | 9              | HLA-A*02:01 | 469           | 77             | 77        | 1.42E+06 | 80  | 36731.61 | 7.70E+01 | 0.00069263  | 28  | 77   | TRUE |            |         |        |         |        |        |         |             |       |
| 1     | LSGIAAEQD  | 749   | 757  | 9              | HLA-A*02:01 | 749           | 77             | 77        | 2.25E+06 | 85  | 36737.96 | 7.70E+01 | 0.00496478  | 71  | 77   | TRUE |            |         |        |         |        |        |         |             |       |
| 1     | NFTTAPAI   | 1056  | 1064 | 9              | HLA-A*02:01 | 1056          | 78             | 78        | 4.41E+05 | 68  | 37194.32 | 7.80E+01 | 0.029661971 | 98  | 78   | TRUE |            |         |        |         |        |        |         |             |       |
| 1     | PAWRYSTG   | 617   | 625  | 9              | HLA-A*02:01 | 617           | 78             | 78        | 4.96E+05 | 68  | 37058.84 | 7.80E+01 | 0.00485279  | 82  | 78   | TRUE |            |         |        |         |        |        |         |             |       |
| 1     | YDPLQFELD  | 1120  | 1128 | 9              | HLA-A*02:01 | 1120          | 78             | 78        | 6.50E+05 | 71  | 38947.56 | 8.50E+01 | 0.00691005  | 78  | 78   | TRUE |            |         |        |         |        |        |         |             |       |
| 1     | DYSVLYNST  | 351   | 359  | 9              | HLA-A*02:01 | 351           | 78             | 78        | 9.06E+05 | 75  | 36987.65 | 7.80E+01 | 0.022356304 | 96  | 78   | TRUE |            |         |        |         |        |        |         |             |       |
| 1     | TDSDRPDKT  | 559   | 567  | 9              | HLA-A*02:01 | 559           | 78             | 78        | 9.10E+05 | 75  | 43854    | 9.80E+01 | 0.00706968  | 78  | 78   | TRUE |            |         |        |         |        |        |         |             |       |
| 1     | NHTSPDVL   | 1140  | 1148 | 9              | HLA-A*02:01 | 1140          | 78             | 78        | 9.75E+05 | 76  | 37318.09 | 7.90E+01 | 0.00710232  | 78  | 78   | TRUE |            |         |        |         |        |        |         |             |       |
| 1     | LTSPSKRRF  | 538   | 546  | 9              | HLA-A*02:01 | 538           | 78             | 78        | 1.13E+06 | 78  | 42578.95 | 9.60E+01 | 0.00536661  | 72  | 78   | TRUE |            |         |        |         |        |        |         |             |       |
| 1     | TSTGNNYK   | 431   | 439  | 9              | HLA-A*02:01 | 431           | 78             | 78        | 1.14E+06 | 78  | 40422.3  | 9.00E+01 | 0.00556032  | 73  | 78   | TRUE |            |         |        |         |        |        |         |             |       |
| 1     | ADAGFMKQY  | 811   | 819  | 9              | HLA-A*02:01 | 811           | 78             | 78        | 1.15E+06 | 78  | 33196.35 | 6.50E+01 | 0.010125116 | 85  | 78   | TRUE |            |         |        |         |        |        |         |             |       |
| 1     | DYGFYTTTG  | 480   | 488  | 9              | HLA-A*02:01 | 480           | 78             | 78        | 1.16E+06 | 78  | 40790.5  | 9.10E+01 | 0.00586678  | 75  | 78   | TRUE |            |         |        |         |        |        |         |             |       |
| 1     | DRNTREVFA  | 757   | 765  | 9              | HLA-A*02:01 | 757           | 78             | 78        | 1.16E+06 | 78  | 39509.08 | 8.70E+01 | 0.00257395  | 56  | 78   | TRUE |            |         |        |         |        |        |         |             |       |
| 1     | ITQILRAAE  | 991   | 999  | 9              | HLA-A*02:01 | 991           | 78             | 78        | 1.18E+06 | 78  | 31400.25 | 5.90E+01 | 0.00704693  | 78  | 78   | TRUE |            |         |        |         |        |        |         |             |       |
| 1     | QFGRDVSDF  | 550   | 558  | 9              | HLA-A*02:01 | 550           | 78             | 78        | 1.18E+06 | 78  | 36760.24 | 7.70E+01 | 0.010836774 | 86  | 78   | TRUE |            |         |        |         |        |        |         |             |       |
| 1     | QDQAPNNT   | 23    | 31   | 9              | HLA-A*02:01 | 23            | 78             | 78        | 1.19E+06 | 78  | 41454.76 | 9.30E+01 | 0.00778997  | 57  | 78   | TRUE |            |         |        |         |        |        |         |             |       |
| 1     | NFNFGITG   | 526   | 534  | 9              | HLA-A*02:01 | 526           | 78             | 78        | 1.20E+06 | 78  | 34432.86 | 7.80E+01 | 0.01999401  | 94  | 78   | TRUE |            |         |        |         |        |        |         |             |       |
| 1     | QSLQTYTQ   | 984   | 992  | 9              | HLA-A*02:01 | 984           | 78             | 78        | 1.20E+06 | 78  | 30072.86 | 5.60E+01 | 0.00830807  | 80  | 78   | TRUE |            |         |        |         |        |        |         |             |       |
| 1     | VCGPKLSTD  | 580   | 588  | 9              | HLA-A*02:01 | 580           | 78             | 78        | 1.22E+06 | 78  | 38796.97 | 8.40E+01 | 0.00320258  | 61  | 78   | TRUE |            |         |        |         |        |        |         |             |       |
| 1     | CHEGKAYFP  | 1064  | 1072 | 9              | HLA-A*02:01 | 1064          | 78             | 78        | 1.71E+06 | 82  | 36956.85 | 7.80E+01 | 0.00058412  | 25  | 78   | TRUE |            |         |        |         |        |        |         |             |       |
| 1     | DCNMVICYD  | 719   | 727  | 9              | HLA-A*02:01 | 719           | 78             | 78        | 1.85E+06 | 83  | 36068.01 | 7.40E+01 | 0.00688177  | 78  | 78   | TRUE |            |         |        |         |        |        |         |             |       |
| 1     | SPCSFGGVS  | 574   | 582  | 9              | HLA-A*02:01 | 574           | 78             | 78        | 2.50E+06 | 86  | 37109.91 | 7.80E+01 | 0.00586949  | 75  | 78   | TRUE |            |         |        |         |        |        |         |             |       |
| 1     | KYDENGIT   | 265   | 273  | 9              | HLA-A*02:01 | 265           | 79             | 79        | 6.05E+04 | 42  | 37386.38 | 7.90E+01 | 0.00901986  | 83  | 79   | TRUE |            |         |        |         |        |        |         |             |       |
| 1     | VKQMYKPT   | 767   | 775  | 9              | HLA-A*02:01 | 767           | 79             | 79        | 9.21E+04 | 47  | 37668.16 | 8.00E+01 | 0.00712853  | 79  | 79   | TRUE |            |         |        |         |        |        |         |             |       |
| 1     | KSGNFHKL   | 175   | 183  | 9              | HLA-A*02:01 | 175           | 79             | 79        | 2.37E+05 | 59  | 37600.97 | 8.00E+01 | 0.00713181  | 79  | 79   | TRUE |            |         |        |         |        |        |         |             |       |
| 1     | STALGLQD   | 924   | 932  | 9              | HLA-A*02:01 | 924           | 79             | 79        | 3.40E+05 | 63  | 38810.84 | 8.40E+01 | 0.0074319   | 79  | 79   | TRUE |            |         |        |         |        |        |         |             |       |
| 1     | SPDGKCPK   | 461   | 469  | 9              | HLA-A*02:01 | 461           | 79             | 79        | 5.72E+05 | 70  | 38724.01 | 8.40E+01 | 0.00714003  | 79  | 79   | TRUE |            |         |        |         |        |        |         |             |       |
| 1     | SDTLTLQD   | 49    | 57   | 9              | HLA-A*02:01 | 49            | 79             | 79        | 5.84E+05 | 70  | 37884.79 | 8.10E+01 | 0.00733669  | 79  | 79   | TRUE |            |         |        |         |        |        |         |             |       |
| 1     | AVSKPMGTQ  | 139   | 147  | 9              | HLA-A*02:01 | 139           | 79             | 79        | 6.84E+05 | 72  | 37425.24 | 7.90E+01 | 0.020878534 | 95  | 79   | TRUE |            |         |        |         |        |        |         |             |       |
| 1     | VSDFIDVR   | 555   | 563  | 9              | HLA-A*02:01 | 555           | 79             | 79        | 7.10E+05 | 72  | 37453.87 | 7.80E+01 | 0.00845668  | 82  | 79   | TRUE |            |         |        |         |        |        |         |             |       |
| 1     | GAHEIDYFV  | 646   | 654  | 9              | HLA-A*02:01 | 646           | 79             | 79        | 1.29E+06 | 76  | 34254.86 | 6.80E+01 | 0.04075679  | 100 | 79   | TRUE |            |         |        |         |        |        |         |             |       |
| 1     | NIESTITTE  | 699   | 707  | 9              | HLA-A*02:01 | 699           | 79             | 79        | 1.54E+06 | 81  | 37284.1  | 6.40E+01 | 0.00742848  | 79  | 79   | TRUE |            |         |        |         |        |        |         |             |       |
| 1     | HGKLPPFER  | 445   | 453  | 9              | HLA-A*02:01 | 445           | 79             | 79        | 2.41E+06 | 85  | 37287    | 7.90E+01 | 0.00370339  | 64  | 79   | TRUE |            |         |        |         |        |        |         |             |       |
| 1     | LAELKCSVK  | 283   | 291  | 9              | HLA-A*02:01 | 283           | 79             | 79        | 2.47E+06 |     |          |          |             |     |      |      |            |         |        |         |        |        |         |             |       |

| seq # | peptide    | start | end  | peptide length | allele      | peptide index | median binding | consensus | perc     | smm | IC50     | smm      | percentil   | ann | IC50 | ann  | percentile | comblib | sidene | comblib | sidene | legacy | consent | percentiles | equal |
|-------|------------|-------|------|----------------|-------------|---------------|----------------|-----------|----------|-----|----------|----------|-------------|-----|------|------|------------|---------|--------|---------|--------|--------|---------|-------------|-------|
| 1     | QERNFTTAP  | 1053  | 1061 | 9              | HLA-A*02:01 | 1053          | 83             | 83        | 3.03E+06 | 87  | 38424.34 | 8.30E+01 | 0.00194581  | 49  | 83   | TRUE |            |         |        |         |        |        |         |             |       |
| 1     | QNPLAEKCK  | 280   | 288  | 9              | HLA-A*02:01 | 280           | 83             | 83        | 4.91E+06 | 91  | 38354.16 | 8.30E+01 | 0.0030486   | 60  | 83   | TRUE |            |         |        |         |        |        |         |             |       |
| 1     | LTAFSPAQD  | 235   | 243  | 9              | HLA-A*02:01 | 235           | 84             | 84        | 1.08E+05 | 49  | 38654.94 | 8.40E+01 | 0.012164661 | 88  | 84   | TRUE |            |         |        |         |        |        |         |             |       |
| 1     | VYAWERKKI  | 337   | 345  | 9              | HLA-A*02:01 | 337           | 84             | 84        | 1.57E+05 | 54  | 41556.26 | 9.30E+01 | 0.00931537  | 84  | 84   | TRUE |            |         |        |         |        |        |         |             |       |
| 1     | WNTNRIDAT  | 423   | 431  | 9              | HLA-A*02:01 | 423           | 84             | 84        | 5.43E+05 | 69  | 40249.06 | 8.90E+01 | 0.0093713   | 84  | 84   | TRUE |            |         |        |         |        |        |         |             |       |
| 1     | AWRYSTGN   | 618   | 626  | 9              | HLA-A*02:01 | 618           | 84             | 84        | 5.31E+05 | 69  | 38639.46 | 8.40E+01 | 0.03279442  | 98  | 84   | TRUE |            |         |        |         |        |        |         |             |       |
| 1     | ATEKSNVVR  | 91    | 99   | 9              | HLA-A*02:01 | 91            | 84             | 84        | 6.30E+05 | 71  | 38828.49 | 8.40E+01 | 0.010553585 | 86  | 84   | TRUE |            |         |        |         |        |        |         |             |       |
| 1     | TRNIDATST  | 425   | 433  | 9              | HLA-A*02:01 | 425           | 84             | 84        | 8.59E+05 | 75  | 39930.66 | 8.80E+01 | 0.00931966  | 84  | 84   | TRUE |            |         |        |         |        |        |         |             |       |
| 1     | HVTYVPSQE  | 1046  | 1054 | 9              | HLA-A*02:01 | 1046          | 84             | 84        | 9.10E+05 | 75  | 38644.9  | 8.40E+01 | 0.01285877  | 89  | 84   | TRUE |            |         |        |         |        |        |         |             |       |
| 1     | VVVGDDVRQ  | 388   | 396  | 9              | HLA-A*02:01 | 388           | 84             | 84        | 1.12E+06 | 78  | 38863.79 | 8.40E+01 | 0.02353423  | 96  | 84   | TRUE |            |         |        |         |        |        |         |             |       |
| 1     | AYTMSLGAD  | 676   | 684  | 9              | HLA-A*02:01 | 676           | 84             | 84        | 1.19E+06 | 78  | 38812.52 | 8.40E+01 | 0.018167702 | 93  | 84   | TRUE |            |         |        |         |        |        |         |             |       |
| 1     | GNPVPFKD   | 77    | 85   | 9              | HLA-A*02:01 | 77            | 84             | 84        | 1.21E+06 | 78  | 38710.6  | 8.40E+01 | 0.010861755 | 87  | 84   | TRUE |            |         |        |         |        |        |         |             |       |
| 1     | LNILSRDL   | 959   | 967  | 9              | HLA-A*02:01 | 959           | 84             | 84        | 2.01E+06 | 84  | 36107.46 | 7.50E+01 | 0.018832154 | 94  | 84   | TRUE |            |         |        |         |        |        |         |             |       |
| 1     | QAGCLIGAE  | 632   | 640  | 9              | HLA-A*02:01 | 632           | 84             | 84        | 2.01E+06 | 84  | 33915.94 | 6.70E+01 | 0.012393672 | 89  | 84   | TRUE |            |         |        |         |        |        |         |             |       |
| 1     | CCSLCKGAC  | 1222  | 1230 | 9              | HLA-A*02:01 | 1222          | 84             | 84        | 2.03E+06 | 84  | 35357.05 | 7.20E+01 | 0.06218706  | 100 | 84   | TRUE |            |         |        |         |        |        |         |             |       |
| 1     | CGDSTECAN  | 725   | 733  | 9              | HLA-A*02:01 | 725           | 84             | 84        | 2.03E+06 | 84  | 39969.15 | 8.80E+01 | 0.00086338  | 32  | 84   | TRUE |            |         |        |         |        |        |         |             |       |
| 1     | TYVPSQERN  | 1048  | 1056 | 9              | HLA-A*02:01 | 1048          | 84             | 84        | 2.08E+06 | 84  | 44953.18 | 1.00E+02 | 0.00180053  | 48  | 84   | TRUE |            |         |        |         |        |        |         |             |       |
| 1     | TGRLOSQIT  | 980   | 988  | 9              | HLA-A*02:01 | 980           | 84             | 84        | 2.16E+06 | 84  | 36143.01 | 7.50E+01 | 0.02360478  | 96  | 84   | TRUE |            |         |        |         |        |        |         |             |       |
| 1     | AAERASAN   | 997   | 1005 | 9              | HLA-A*02:01 | 997           | 84             | 84        | 3.01E+06 | 87  | 38754.61 | 8.40E+01 | 0.0064328   | 76  | 84   | TRUE |            |         |        |         |        |        |         |             |       |
| 1     | NESLIQOE   | 1176  | 1184 | 9              | HLA-A*02:01 | 1176          | 84             | 84        | 1.41E+07 | 97  | 34027.3  | 6.70E+01 | 0.00966051  | 84  | 84   | TRUE |            |         |        |         |        |        |         |             |       |
| 1     | QDRNTREVF  | 756   | 764  | 9              | HLA-A*02:01 | 756           | 84             | 84        | 2.36E+07 | 98  | 38725.25 | 8.40E+01 | 0.00883894  | 83  | 84   | TRUE |            |         |        |         |        |        |         |             |       |
| 1     | NVTGFTHTN  | 65    | 73   | 9              | HLA-A*02:01 | 65            | 85             | 85        | 3.41E+05 | 63  | 39132.14 | 8.50E+01 | 0.01996181  | 94  | 85   | TRUE |            |         |        |         |        |        |         |             |       |
| 1     | LYENKQJIA  | 898   | 906  | 9              | HLA-A*02:01 | 898           | 85             | 85        | 5.05E+05 | 68  | 41927.51 | 9.40E+01 | 0.010027669 | 85  | 85   | TRUE |            |         |        |         |        |        |         |             |       |
| 1     | VKSFDEIKG  | 290   | 298  | 9              | HLA-A*02:01 | 290           | 85             | 85        | 1.15E+06 | 78  | 39790.07 | 8.80E+01 | 0.010185914 | 85  | 85   | TRUE |            |         |        |         |        |        |         |             |       |
| 1     | SGIAAEQDR  | 750   | 758  | 9              | HLA-A*02:01 | 750           | 85             | 85        | 2.21E+06 | 85  | 42452.91 | 9.50E+01 | 0.0002341   | 13  | 85   | TRUE |            |         |        |         |        |        |         |             |       |
| 1     | VRQIAPQQT  | 394   | 402  | 9              | HLA-A*02:01 | 394           | 85             | 85        | 2.23E+06 | 85  | 39099.54 | 8.50E+01 | 0.0204833   | 95  | 85   | TRUE |            |         |        |         |        |        |         |             |       |
| 1     | PTTFMLKYD  | 259   | 267  | 9              | HLA-A*02:01 | 259           | 85             | 85        | 2.25E+06 | 85  | 39744.89 | 8.70E+01 | 0.00175752  | 47  | 85   | TRUE |            |         |        |         |        |        |         |             |       |
| 1     | TDVAVDCSQN | 273   | 281  | 9              | HLA-A*02:01 | 273           | 85             | 85        | 2.30E+06 | 85  | 43062.66 | 9.70E+01 | 0.0085428   | 82  | 85   | TRUE |            |         |        |         |        |        |         |             |       |
| 1     | HTSSMRGVY  | 33    | 41   | 9              | HLA-A*02:01 | 33            | 85             | 85        | 2.32E+06 | 85  | 39053.48 | 8.50E+01 | 0.00167958  | 46  | 85   | TRUE |            |         |        |         |        |        |         |             |       |
| 1     | KEFLDKYFK  | 1131  | 1139 | 9              | HLA-A*02:01 | 1131          | 85             | 85        | 2.38E+06 | 85  | 39045.02 | 8.50E+01 | 0.0017112   | 47  | 85   | TRUE |            |         |        |         |        |        |         |             |       |
| 1     | LDSEKEELD  | 1127  | 1135 | 9              | HLA-A*02:01 | 1127          | 85             | 85        | 2.43E+06 | 85  | 42578.05 | 9.60E+01 | 0.00310099  | 60  | 85   | TRUE |            |         |        |         |        |        |         |             |       |
| 1     | REIVFRKND  | 183   | 191  | 9              | HLA-A*02:01 | 183           | 85             | 85        | 2.44E+06 | 85  | 39915.55 | 8.80E+01 | 0.00966273  | 84  | 85   | TRUE |            |         |        |         |        |        |         |             |       |
| 1     | TGVLTPSSK  | 535   | 543  | 9              | HLA-A*02:01 | 535           | 85             | 85        | 3.94E+06 | 89  | 38994.79 | 8.50E+01 | 0.00350994  | 63  | 85   | TRUE |            |         |        |         |        |        |         |             |       |
| 1     | DCSONPLAE  | 277   | 285  | 9              | HLA-A*02:01 | 277           | 85             | 85        | 3.34E+07 | 99  | 38994.79 | 8.50E+01 | 0.00856249  | 82  | 85   | TRUE |            |         |        |         |        |        |         |             |       |
| 1     | LDKVEAEVQ  | 966   | 974  | 9              | HLA-A*02:01 | 966           | 85             | 85        | 4.25E+07 | 100 | 39019.69 | 8.50E+01 | 0.00924911  | 83  | 85   | TRUE |            |         |        |         |        |        |         |             |       |
| 1     | GVLTTPSSKR | 536   | 544  | 9              | HLA-A*02:01 | 536           | 86             | 86        | 1.35E+05 | 52  | 40964.3  | 9.10E+01 | 0.010505095 | 86  | 86   | TRUE |            |         |        |         |        |        |         |             |       |
| 1     | SGSDLDRCR  | 12    | 20   | 9              | HLA-A*02:01 | 12            | 86             | 86        | 2.42E+05 | 59  | 39362.72 | 8.60E+01 | 0.011857687 | 88  | 86   | TRUE |            |         |        |         |        |        |         |             |       |
| 1     | SVRDPKTSF  | 561   | 569  | 9              | HLA-A*02:01 | 561           | 86             | 86        | 1.90E+06 | 83  | 42281.92 | 9.50E+01 | 0.010399202 | 86  | 86   | TRUE |            |         |        |         |        |        |         |             |       |
| 1     | ACNFELCON  | 127   | 135  | 9              | HLA-A*02:01 | 127           | 86             | 86        | 2.49E+06 | 86  | 35823    | 7.40E+01 | 0.015689171 | 92  | 86   | TRUE |            |         |        |         |        |        |         |             |       |
| 1     | VNIQKEIDR  | 1159  | 1167 | 9              | HLA-A*02:01 | 1159          | 86             | 86        | 2.53E+06 | 86  | 39707.94 | 8.70E+01 | 0.00042678  | 20  | 86   | TRUE |            |         |        |         |        |        |         |             |       |
| 1     | NNTIAIPTN  | 691   | 699  | 9              | HLA-A*02:01 | 691           | 86             | 86        | 2.57E+06 | 86  | 39615.25 | 8.70E+01 | 0.00103276  | 35  | 86   | TRUE |            |         |        |         |        |        |         |             |       |
| 1     | DDVRQIAPG  | 392   | 400  | 9              | HLA-A*02:01 | 392           | 86             | 86        | 2.64E+06 | 86  | 42151.29 | 9.50E+01 | 0.00170844  | 46  | 86   | TRUE |            |         |        |         |        |        |         |             |       |
| 1     | SKPMGTQTH  | 141   | 149  | 9              | HLA-A*02:01 | 141           | 86             | 86        | 2.66E+06 | 86  | 40337.56 | 8.90E+01 | 0.00199618  | 50  | 86   | TRUE |            |         |        |         |        |        |         |             |       |
| 1     | NCTFEYSD   | 158   | 166  | 9              | HLA-A*02:01 | 158           | 86             | 86        | 3.67E+06 | 89  | 39218.62 | 8.60E+01 | 0.00511093  | 71  | 86   | TRUE |            |         |        |         |        |        |         |             |       |
| 1     | VSEKSGNFK  | 172   | 180  | 9              | HLA-A*02:01 | 172           | 86             | 86        | 4.72E+06 | 90  | 38843.19 | 8.40E+01 | 0.010717661 | 86  | 86   | TRUE |            |         |        |         |        |        |         |             |       |
| 1     | GVNVLGSTMN | 100   | 108  | 9              | HLA-A*02:01 | 100           | 87             | 87        | 3.79E+05 | 65  | 39513.36 | 8.70E+01 | 0.021667061 | 95  | 87   | TRUE |            |         |        |         |        |        |         |             |       |
| 1     | NVPFSPQKG  | 457   | 465  | 9              | HLA-A*02:01 | 457           | 87             | 87        | 5.43E+05 | 69  | 39529.6  | 8.70E+01 | 0.024963185 | 87  | 87   | TRUE |            |         |        |         |        |        |         |             |       |
| 1     | APNYTQHTS  | 27    | 35   | 9              | HLA-A*02:01 | 27            | 87             | 87        | 5.56E+05 | 69  | 41937.92 | 9.40E+01 | 0.010929493 | 87  | 87   | TRUE |            |         |        |         |        |        |         |             |       |
| 1     | CKDEDDOSE  | 1236  | 1244 | 9              | HLA-A*02:01 | 1236          | 87             | 87        | 2.81E+06 | 87  | 41626    | 9.30E+01 | 0.00280543  | 58  | 87   | TRUE |            |         |        |         |        |        |         |             |       |
| 1     | YGECLGDIN  | 819   | 827  | 9              | HLA-A*02:01 | 819           | 87             | 87        | 2.86E+06 | 87  | 37142.86 | 7.80E+01 | 0.00981596  | 100 | 87   | TRUE |            |         |        |         |        |        |         |             |       |
| 1     | QVQVMYKTP  | 766   | 774  | 9              | HLA-A*02:01 | 766           | 87             | 87        | 3.39E+06 | 88  | 39719.54 | 8.70E+01 | 0.00665426  | 77  | 87   | TRUE |            |         |        |         |        |        |         |             |       |
| 1     | DDSEPLVKG  | 1241  | 1249 | 9              | HLA-A*02:01 | 1241          | 87             | 87        | 3.54E+06 | 88  | 39693.76 | 8.70E+01 | 0.00592379  | 75  | 87   | TRUE |            |         |        |         |        |        |         |             |       |
| 1     | AEHVDTSYE  | 639   | 647  | 9              | HLA-A*02:01 | 639           | 87             | 87        | 3.75E+06 | 89  | 39550.99 | 8.70E+01 | 0.00105196  | 35  | 87   | TRUE |            |         |        |         |        |        |         |             |       |
| 1     | TSTALGLKG  | 923   | 931  | 9              | HLA-A*02:01 | 923           | 87             | 87        | 9.31E+06 | 95  | 38823.03 | 8.40E+01 | 0.0110535   | 87  | 87   | TRUE |            |         |        |         |        |        |         |             |       |
| 1     | PCPTPALNC  | 466   | 474  | 9              | HLA-A*02:01 | 466           | 87             | 87        | 1.11E+07 | 96  | 39667.99 | 8.70E+01 | 0.00513452  | 71  | 87   | TRUE |            |         |        |         |        |        |         |             |       |
| 1     | DNAAFNCTFE | 154   | 162  | 9              | HLA-A*02:01 | 154           | 87             | 87        | 1.48E+07 | 97  | 39602.37 | 8.70E+01 | 0.00238781  | 54  | 87   | TRUE |            |         |        |         |        |        |         |             |       |
| 1     | QPELDSKE   | 1124  | 1132 | 9              | HLA-A*02:01 | 1124          | 87             | 87        | 1.63E+07 | 97  | 39732.43 | 8.70E+01 | 0.01103622  | 87  | 87   | TRUE |            |         |        |         |        |        |         |             |       |
| 1     | LRSTYSQSI  | 666   | 674  | 9              | HLA-A*02:01 | 666           | 88             | 88        | 2.42E+05 | 59  | 40674.57 | 9.00E+01 | 0.01211714  | 88  | 88   | TRUE |            |         |        |         |        |        |         |             |       |
| 1     | GSCKCFQED  | 1283  | 1291 | 9              | HLA-A*02:01 | 1283          | 88             | 88        | 6.43E+05 | 71  | 39782.22 | 8.80E+01 | 0.01098015  | 94  | 88   | TRUE |            |         |        |         |        |        |         |             |       |
| 1     | KRCTPALNM  | 465   | 473  | 9              | HLA-A*02:01 | 465           | 88             | 88        | 1.54E+06 | 86  | 40214.23 | 8.80E+01 | 0.022068881 | 93  | 88   | TRUE |            |         |        |         |        |        |         |             |       |
| 1     | NKVTLDADG  | 806   | 814  | 9              | HLA-A*02:01 | 806           | 88             | 88        | 1.95E+06 | 83  | 39965.68 | 8.80E+01 | 0.012387966 | 89  | 88   | TRUE |            |         |        |         |        |        |         |             |       |
| 1     | DTSEYCDP   | 643   | 651  | 9              | HLA-A*02:01 | 643           | 88             | 88        | 2.30E+06 | 85  | 39887.91 | 8.80E+01 | 0.042589251 | 100 | 88   | TRUE |            |         |        |         |        |        |         |             |       |
| 1     | GKLRPFERD  | 446   | 454  | 9              | HLA-A*02:01 | 446           | 88             | 88        | 3.16E+06 | 88  | 42617.22 | 9.60E+01 | 0.00597173  | 75  | 88   | TRUE |            |         |        |         |        |        |         |             |       |
| 1     | VPFSPDGKX  | 458   | 466  | 9              | HLA-A*02:01 | 458           | 88             | 88        | 3.33E+06 | 88  | 42477.72 | 9.50E+01 | 0.00390571  | 65  | 88   | TRUE |            |         |        |         |        |        |         |             |       |
| 1     | SEKSGFNKH  | 173   | 181  | 9              | HLA-A*02:01 | 173           | 88             | 88        | 3.34E+06 | 88  | 42420.78 | 9.50E+01 | 0.0091664   | 33  | 88   | TRUE |            |         |        |         |        |        |         |             |       |
| 1     | WRIVSTGNN  | 619   | 627  | 9              | HLA-A*02:01 | 619           | 88             | 88        | 3.34E+06 | 88  | 43914.28 | 9.80E+01 | 0.00353671  | 63  | 88   | TRUE |            |         |        |         |        |        |         |             |       |
| 1     | DAGFMKQYG  | 812   | 820  | 9              | HLA-A*02:01 | 812           | 88             | 88        | 3.52E+06 | 88  | 41792.53 | 9.40E+01 | 0.00133783  | 41  | 88   | TRUE |            |         |        |         |        |        |         |             |       |
| 1     | MRGVYYPDE  | 37    | 45   | 9              | HLA-A*02:01 | 37            | 88             | 88        | 4.26E+06 | 90  | 39952.27 | 8.80E+01 | 0.00664355  | 77  | 88   | TRUE |            |         |        |         |        |        |         |             |       |
| 1     | SOCKFDEDD  | 1234  | 1242 | 9              | HLA-A*02:01 | 1234          | 88             | 88        | 6.34E+06 | 93  | 37914.31 | 8.10E+01 | 0.011898713 | 88  | 88   | TRUE |            |         |        |         |        |        |         |             |       |
| 1     | EDOSEPLVK  | 1240  | 1248 | 9              | HLA-A*02:01 | 1240          | 88             | 88        | 6.97E+06 | 93  | 39851.25 | 8.80E+01 | 0.00229985  | 53  | 88   | TRUE |            |         |        |         |        |        |         |             |       |
| 1     | HVDTSYEDC  | 641   | 649  | 9              | HLA-A*02:01 | 641           | 89             | 89        | 2.72E+05 | 60  | 40344.98 | 8.90E+01 | 0.01564228  | 92  | 89   | TRUE |            |         |        |         |        |        |         |             |       |
| 1     | MAKTSYDCN  | 713   | 721  | 9              | HLA-A*02:01 | 713           | 89             | 89        | 7.36E+05 | 73  | 40184.22 | 9.80E+01 | 0.03992077  | 94  | 89   | TRUE |            |         |        |         |        |        |         |             |       |
| 1     | KYRVRHEK   | 495   | 503  | 9              | HLA-A*02:01 | 495           | 89             | 89        | 2.55E+06 | 86  | 40214.23 | 8.80E+01 | 0.0286142   | 91  | 89   | TRUE |            |         |        |         |        |        |         |             |       |
| 1     | SKRFQPFQK  | 542   | 550  | 9              | HLA-A*02:01 | 542           | 89             | 89        | 3.59E+06 | 89  | 37749.77 | 8.80E+01 | 0.015370925 | 91  | 89   | TRUE |            |         |        |         |        |        |         |             |       |
| 1     | PFSFQPKPC  | 459   | 467  | 9              | HLA-A*02:01 | 459           | 89             | 89        | 3.62E+06 | 89  | 44025.61 | 9.90E+01 | 0.00533335  | 72  | 89   | TRUE |            |         |        |         |        |        |         |             |       |
| 1     | AWERKKISN  | 339   | 347  | 9              | HLA-A*02:01 | 339           | 89             | 89        | 3.65E    |     |          |          |             |     |      |      |            |         |        |         |        |        |         |             |       |

| seq # | peptide   | start | end  | peptide length | allele      | peptide index | median binding | consensus perc | smm IC50    | smm percentile | ann IC50 | ann percentile | comblib_sidne | comblib_sidne | legacy consen | percentiles equal |
|-------|-----------|-------|------|----------------|-------------|---------------|----------------|----------------|-------------|----------------|----------|----------------|---------------|---------------|---------------|-------------------|
| 1     | PDGKPCTPP | 462   | 470  | 9              | HLA-A*02:01 | 462           | 95             | 95             | 1.08E+07    | 95             | 42198.75 | 9.50E+01       | 0.00555009    | 73            | 95            | TRUE              |
| 1     | NGTITDAVD | 269   | 277  | 9              | HLA-A*02:01 | 269           | 95             | 95             | 10867008.33 | 95             | 42077.01 | 94             | 0.030276105   | 98            | 95            | TRUE              |
| 1     | CKFDEDDSD | 1235  | 1243 | 9              | HLA-A*02:01 | 1235          | 95             | 95             | 24553307.34 | 98             | 42377.66 | 95             | 0.02100874    | 95            | 95            | TRUE              |
| 1     | DRLTIGRLQ | 976   | 984  | 9              | HLA-A*02:01 | 976           | 95             | 95             | 112230268   | 100            | 37593.65 | 80             | 0.020715718   | 95            | 95            | TRUE              |
| 1     | DSSIAYSNN | 684   | 692  | 9              | HLA-A*02:01 | 684           | 96             | 96             | 11223026.8  | 96             | 42545.33 | 96             | 0.017790985   | 93            | 96            | TRUE              |
| 1     | QDVVQNAQ  | 931   | 939  | 9              | HLA-A*02:01 | 931           | 96             | 96             | 12419668.39 | 96             | 43558.91 | 98             | 0.00807421    | 81            | 96            | TRUE              |
| 1     | DSFVVKGD  | 385   | 393  | 9              | HLA-A*02:01 | 385           | 96             | 96             | 26675342.24 | 99             | 40916.46 | 91             | 0.023555916   | 96            | 96            | TRUE              |
| 1     | PELDSFKEE | 1125  | 1133 | 9              | HLA-A*02:01 | 1125          | 97             | 97             | 14292559.21 | 97             | 43608.41 | 98             | 0.00238671    | 54            | 97            | TRUE              |
| 1     | LGKLDQVNV | 927   | 935  | 9              | HLA-A*02:01 | 927           | 97             | 97             | 14828936.31 | 97             | 40330.12 | 89             | 0.026804024   | 97            | 97            | TRUE              |
| 1     | SFEIDKGIY | 292   | 300  | 9              | HLA-A*02:01 | 292           | 97             | 97             | 16372311.54 | 97             | 36254.25 | 75             | 0.116654098   | 100           | 97            | TRUE              |
| 1     | NYKYRYLRH | 437   | 445  | 9              | HLA-A*02:01 | 437           | 97             | 97             | 16753671.67 | 97             | 38624.84 | 84             | 0.037792011   | 99            | 97            | TRUE              |
| 1     | TPGTNASSE | 585   | 593  | 9              | HLA-A*02:01 | 585           | 97             | 97             | 17143914.81 | 97             | 44042.28 | 99             | 0.00423253    | 67            | 97            | TRUE              |
| 1     | DNTFVSGNC | 1100  | 1108 | 9              | HLA-A*02:01 | 1100          | 97             | 97             | 18243577.25 | 97             | 40989.56 | 91             | 0.04584585    | 100           | 97            | TRUE              |
| 1     | ECVLQSKSR | 1013  | 1021 | 9              | HLA-A*02:01 | 1013          | 97             | 97             | 20096017.49 | 98             | 43337.02 | 97             | 0.00317541    | 60            | 97            | TRUE              |
| 1     | LNEVAKNLN | 1168  | 1176 | 9              | HLA-A*02:01 | 1168          | 97             | 97             | 23829229.5  | 98             | 42959.8  | 96             | 0.0258226     | 97            | 97            | TRUE              |
| 1     | PDPLKPTKR | 789   | 797  | 9              | HLA-A*02:01 | 789           | 97             | 97             | 26736835.25 | 99             | 43228.83 | 97             | 0.021261799   | 95            | 97            | TRUE              |
| 1     | DPKTSEILD | 564   | 572  | 9              | HLA-A*02:01 | 564           | 97             | 97             | 54589611.05 | 100            | 43461.46 | 97             | 0.00251131    | 55            | 97            | TRUE              |
| 1     | LRPFERDIS | 448   | 456  | 9              | HLA-A*02:01 | 448           | 98             | 98             | 11697956.44 | 96             | 43836.44 | 98             | 0.09298224    | 100           | 98            | TRUE              |
| 1     | DPKPTKRS  | 790   | 798  | 9              | HLA-A*02:01 | 790           | 98             | 98             | 21883158.2  | 98             | 45117.39 | 100            | 0.00380014    | 64            | 98            | TRUE              |
| 1     | SEPLVKGVK | 1243  | 1251 | 9              | HLA-A*02:01 | 1243          | 98             | 98             | 22289996.49 | 98             | 41635.02 | 93             | 0.05679368    | 100           | 98            | TRUE              |
| 1     | LREFVFNK  | 182   | 190  | 9              | HLA-A*02:01 | 182           | 98             | 98             | 22652179.79 | 98             | 32338.44 | 62             | 0.05066406    | 100           | 98            | TRUE              |
| 1     | PDEIFRSOT | 43    | 51   | 9              | HLA-A*02:01 | 43            | 98             | 98             | 45825794.16 | 100            | 43030.04 | 97             | 0.03042286    | 98            | 98            | TRUE              |
| 1     | KNHTSPDVD | 1139  | 1147 | 9              | HLA-A*02:01 | 1139          | 99             | 99             | 4700131.405 | 90             | 44272.57 | 99             | 0.033181804   | 99            | 99            | TRUE              |
| 1     | DSVRDPKTS | 560   | 568  | 9              | HLA-A*02:01 | 560           | 99             | 99             | 9888035.11  | 95             | 44596.13 | 99             | 0.05546257    | 100           | 99            | TRUE              |
| 1     | EFVFNKDG  | 184   | 192  | 9              | HLA-A*02:01 | 184           | 99             | 99             | 29181660.46 | 99             | 44753.7  | 100            | 0.018276793   | 93            | 99            | TRUE              |
| 1     | NPVIFKDG  | 78    | 86   | 9              | HLA-A*02:01 | 78            | 99             | 99             | 29724188.04 | 99             | 38761.31 | 84             | 0.04792918    | 100           | 99            | TRUE              |
| 1     | QKEIDRLNE | 1162  | 1170 | 9              | HLA-A*02:01 | 1162          | 100            | 100            | 115374544.6 | 100            | 41357.99 | 92             | 0.06367955    | 100           | 100           | TRUE              |

| seq # | peptide    | start | end  | peptide length | allele      | peptide index | median binding | ann IC50 | ann percentile | legacy IC50 | legacy rank | scores equal | percentiles equal |
|-------|------------|-------|------|----------------|-------------|---------------|----------------|----------|----------------|-------------|-------------|--------------|-------------------|
| 1     | FIAGLIAV   | 1202  | 1210 | 9              | HLA-A*02:01 | 1202          | 0.09           | 10.29    | 0.09           | 10.29       | 0.09        | TRUE         | TRUE              |
| 1     | MIAAYTAAL  | 851   | 859  | 9              | HLA-A*02:01 | 851           | 0.13           | 14.39    | 0.13           | 14.39       | 0.13        | TRUE         | TRUE              |
| 1     | RLQSLQTYV  | 982   | 990  | 9              | HLA-A*02:01 | 982           | 0.16           | 16.66    | 0.16           | 16.66       | 0.16        | TRUE         | TRUE              |
| 1     | YLKPTTFML  | 256   | 264  | 9              | HLA-A*02:01 | 256           | 0.17           | 18.56    | 0.17           | 18.56       | 0.17        | TRUE         | TRUE              |
| 1     | LLFNKVTLA  | 803   | 811  | 9              | HLA-A*02:01 | 803           | 0.22           | 25.41    | 0.22           | 25.41       | 0.22        | TRUE         | TRUE              |
| 1     | FSISITTEV  | 700   | 708  | 9              | HLA-A*02:01 | 700           | 0.27           | 30.13    | 0.27           | 30.13       | 0.27        | TRUE         | TRUE              |
| 1     | HLMSFPQAA  | 1030  | 1038 | 9              | HLA-A*02:01 | 1030          | 0.28           | 30.89    | 0.28           | 30.89       | 0.28        | TRUE         | TRUE              |
| 1     | LLTDDMIAA  | 846   | 854  | 9              | HLA-A*02:01 | 846           | 0.29           | 32.91    | 0.29           | 32.91       | 0.29        | TRUE         | TRUE              |
| 1     | VLNDILSLR  | 958   | 966  | 9              | HLA-A*02:01 | 958           | 0.3            | 33.57    | 0.3            | 33.57       | 0.3         | TRUE         | TRUE              |
| 1     | VVFLHVTYV  | 1042  | 1050 | 9              | HLA-A*02:01 | 1042          | 0.33           | 36.56    | 0.33           | 36.56       | 0.33        | TRUE         | TRUE              |
| 1     | SIVAYTMSL  | 673   | 681  | 9              | HLA-A*02:01 | 673           | 0.33           | 37.41    | 0.33           | 37.41       | 0.33        | TRUE         | TRUE              |
| 1     | RLDKVEAEV  | 965   | 973  | 9              | HLA-A*02:01 | 965           | 0.35           | 38.95    | 0.35           | 38.95       | 0.35        | TRUE         | TRUE              |
| 1     | VYVYGYQPI  | 195   | 203  | 9              | HLA-A*02:01 | 195           | 0.43           | 47.04    | 0.43           | 47.04       | 0.43        | TRUE         | TRUE              |
| 1     | KOMYKPTTL  | 768   | 776  | 9              | HLA-A*02:01 | 768           | 0.43           | 47.7     | 0.43           | 47.7        | 0.43        | TRUE         | TRUE              |
| 1     | VIADYNNYK  | 404   | 412  | 9              | HLA-A*02:01 | 404           | 0.46           | 50.27    | 0.46           | 50.27       | 0.46        | TRUE         | TRUE              |
| 1     | SITTEVMPIV | 703   | 711  | 9              | HLA-A*02:01 | 703           | 0.46           | 50.81    | 0.46           | 50.81       | 0.46        | TRUE         | TRUE              |
| 1     | VLVNSTFFS  | 354   | 362  | 9              | HLA-A*02:01 | 354           | 0.64           | 70.21    | 0.64           | 70.21       | 0.64        | TRUE         | TRUE              |
| 1     | FIFLLFLT   | 2     | 10   | 9              | HLA-A*02:01 | 2             | 0.66           | 71.52    | 0.66           | 71.52       | 0.66        | TRUE         | TRUE              |
| 1     | NVYADSFVV  | 381   | 389  | 9              | HLA-A*02:01 | 381           | 0.77           | 87.86    | 0.77           | 87.86       | 0.77        | TRUE         | TRUE              |
| 1     | ALVSGTATA  | 858   | 866  | 9              | HLA-A*02:01 | 858           | 0.97           | 122.57   | 0.97           | 122.57      | 0.97        | TRUE         | TRUE              |
| 1     | GLTVLPPLL  | 839   | 847  | 9              | HLA-A*02:01 | 839           | 1.2            | 130.4    | 1.2            | 130.4       | 1.2         | TRUE         | TRUE              |
| 1     | KQLSSNFAGA | 946   | 954  | 9              | HLA-A*02:01 | 946           | 1.2            | 141.16   | 1.2            | 141.16      | 1.2         | TRUE         | TRUE              |
| 1     | FLLLTLTS   | 4     | 12   | 9              | HLA-A*02:01 | 4             | 1.2            | 141.86   | 1.2            | 141.86      | 1.2         | TRUE         | TRUE              |
| 1     | GTSAAAYFV  | 246   | 254  | 9              | HLA-A*02:01 | 246           | 1.4            | 167.91   | 1.4            | 167.91      | 1.4         | TRUE         | TRUE              |
| 1     | NLNESLIDL  | 1174  | 1182 | 9              | HLA-A*02:01 | 1174          | 1.4            | 177.32   | 1.4            | 177.32      | 1.4         | TRUE         | TRUE              |
| 1     | ATAGWTFGA  | 864   | 872  | 9              | HLA-A*02:01 | 864           | 1.6            | 207.35   | 1.6            | 207.35      | 1.6         | TRUE         | TRUE              |
| 1     | IIINNSTNV  | 115   | 123  | 9              | HLA-A*02:01 | 115           | 1.7            | 228.99   | 1.7            | 228.99      | 1.7         | TRUE         | TRUE              |
| 1     | GLIAIVMVT  | 1205  | 1213 | 9              | HLA-A*02:01 | 1205          | 1.8            | 242.04   | 1.8            | 242.04      | 1.8         | TRUE         | TRUE              |
| 1     | TMNNKSQSV  | 106   | 114  | 9              | HLA-A*02:01 | 106           | 1.8            | 254.01   | 1.8            | 254.01      | 1.8         | TRUE         | TRUE              |
| 1     | VLSFELLNA  | 498   | 506  | 9              | HLA-A*02:01 | 498           | 2              | 273.66   | 2              | 273.66      | 2           | TRUE         | TRUE              |
| 1     | ELLNAPATV  | 502   | 510  | 9              | HLA-A*02:01 | 502           | 2              | 279.55   | 2              | 279.55      | 2           | TRUE         | TRUE              |
| 1     | FVSGNCQDV  | 1103  | 1111 | 9              | HLA-A*02:01 | 1103          | 2              | 290.37   | 2              | 290.37      | 2           | TRUE         | TRUE              |
| 1     | SLTTTSTAL  | 919   | 927  | 9              | HLA-A*02:01 | 919           | 2              | 300.04   | 2              | 300.04      | 2           | TRUE         | TRUE              |
| 1     | IITDNTFTV  | 1096  | 1104 | 9              | HLA-A*02:01 | 1096          | 2.2            | 338.82   | 2.2            | 338.82      | 2.2         | TRUE         | TRUE              |
| 1     | AILTAFSPA  | 233   | 241  | 9              | HLA-A*02:01 | 233           | 2.3            | 351.2    | 2.3            | 351.2       | 2.3         | TRUE         | TRUE              |
| 1     | FLPFYSNVT  | 59    | 67   | 9              | HLA-A*02:01 | 59            | 2.4            | 394.17   | 2.4            | 394.17      | 2.4         | TRUE         | TRUE              |
| 1     | ILLCCMTSC  | 1214  | 1222 | 9              | HLA-A*02:01 | 1214          | 2.5            | 403.87   | 2.5            | 403.87      | 2.5         | TRUE         | TRUE              |
| 1     | ELCDNPFFA  | 131   | 139  | 9              | HLA-A*02:01 | 131           | 2.5            | 408.87   | 2.5            | 408.87      | 2.5         | TRUE         | TRUE              |
| 1     | RVVVSFLF   | 495   | 503  | 9              | HLA-A*02:01 | 495           | 2.5            | 419.83   | 2.5            | 419.83      | 2.5         | TRUE         | TRUE              |
| 1     | MIFDNAFNC  | 151   | 159  | 9              | HLA-A*02:01 | 151           | 2.5            | 421.14   | 2.5            | 421.14      | 2.5         | TRUE         | TRUE              |
| 1     | IAIPTNFSI  | 694   | 702  | 9              | HLA-A*02:01 | 694           | 2.8            | 487.32   | 2.8            | 487.32      | 2.8         | TRUE         | TRUE              |
| 1     | FSTFKCYGV  | 361   | 369  | 9              | HLA-A*02:01 | 361           | 2.8            | 504.47   | 2.8            | 504.47      | 2.8         | TRUE         | TRUE              |
| 1     | LLQYGSFCT  | 735   | 743  | 9              | HLA-A*02:01 | 735           | 2.9            | 541.11   | 2.9            | 541.11      | 2.9         | TRUE         | TRUE              |
| 1     | GICASYHTV  | 655   | 663  | 9              | HLA-A*02:01 | 655           | 3              | 546.07   | 3              | 546.07      | 3           | TRUE         | TRUE              |
| 1     | QMAFYRNGI  | 883   | 891  | 9              | HLA-A*02:01 | 883           | 3              | 550.3    | 3              | 550.3       | 3           | TRUE         | TRUE              |
| 1     | TQAGCLIGA  | 631   | 639  | 9              | HLA-A*02:01 | 631           | 3              | 551.45   | 3              | 551.45      | 3           | TRUE         | TRUE              |
| 1     | VLVENQKQI  | 897   | 905  | 9              | HLA-A*02:01 | 897           | 3              | 562.95   | 3              | 562.95      | 3           | TRUE         | TRUE              |
| 1     | YQDVNCTDV  | 598   | 606  | 9              | HLA-A*02:01 | 598           | 3.2            | 612.82   | 3.2            | 612.82      | 3.2         | TRUE         | TRUE              |
| 1     | CMTSSCCSL  | 1218  | 1226 | 9              | HLA-A*02:01 | 1218          | 3.2            | 629.65   | 3.2            | 629.65      | 3.2         | TRUE         | TRUE              |
| 1     | TSYEDCIDI  | 644   | 652  | 9              | HLA-A*02:01 | 644           | 3.2            | 639.51   | 3.2            | 639.51      | 3.2         | TRUE         | TRUE              |
| 1     | LIAIVMVTI  | 1206  | 1214 | 9              | HLA-A*02:01 | 1206          | 3.4            | 691.85   | 3.4            | 691.85      | 3.4         | TRUE         | TRUE              |
| 1     | FMKQYGECL  | 815   | 823  | 9              | HLA-A*02:01 | 815           | 3.4            | 698.66   | 3.4            | 698.66      | 3.4         | TRUE         | TRUE              |
| 1     | AIVMVTILL  | 1208  | 1216 | 9              | HLA-A*02:01 | 1208          | 3.4            | 711.15   | 3.4            | 711.15      | 3.4         | TRUE         | TRUE              |
| 1     | ALGKLQDVV  | 926   | 934  | 9              | HLA-A*02:01 | 926           | 3.4            | 717.01   | 3.4            | 717.01      | 3.4         | TRUE         | TRUE              |
| 1     | VIRACNFEL  | 124   | 132  | 9              | HLA-A*02:01 | 124           | 3.6            | 786.23   | 3.6            | 786.23      | 3.6         | TRUE         | TRUE              |
| 1     | VLAWNTRNI  | 420   | 428  | 9              | HLA-A*02:01 | 420           | 3.7            | 808.52   | 3.7            | 808.52      | 3.7         | TRUE         | TRUE              |
| 1     | YQPYRVVVV  | 491   | 499  | 9              | HLA-A*02:01 | 491           | 3.9            | 862.1    | 3.9            | 862.1       | 3.9         | TRUE         | TRUE              |
| 1     | LQIPFAMQM  | 876   | 884  | 9              | HLA-A*02:01 | 876           | 4              | 896.61   | 4              | 896.61      | 4           | TRUE         | TRUE              |
| 1     | RLNEVAKNL  | 1167  | 1175 | 9              | HLA-A*02:01 | 1167          | 4.1            | 940.92   | 4.1            | 940.92      | 4.1         | TRUE         | TRUE              |
| 1     | YLTVQDLFP  | 53    | 61   | 9              | HLA-A*02:01 | 53            | 4.2            | 975.48   | 4.2            | 975.48      | 4.2         | TRUE         | TRUE              |
| 1     | KLPPDFMGC  | 411   | 419  | 9              | HLA-A*02:01 | 411           | 4.3            | 1013.85  | 4.3            | 1013.85     | 4.3         | TRUE         | TRUE              |
| 1     | RIYSTGNNV  | 620   | 628  | 9              | HLA-A*02:01 | 620           | 4.4            | 1067.65  | 4.4            | 1067.65     | 4.4         | TRUE         | TRUE              |
| 1     | IINNSTNNV  | 116   | 124  | 9              | HLA-A*02:01 | 116           | 4.4            | 1073.84  | 4.4            | 1073.84     | 4.4         | TRUE         | TRUE              |
| 1     | YOTSNNRVV  | 300   | 308  | 9              | HLA-A*02:01 | 300           | 4.6            | 1149.79  | 4.6            | 1149.79     | 4.6         | TRUE         | TRUE              |
| 1     | FLHVTYVPS  | 1044  | 1052 | 9              | HLA-A*02:01 | 1044          | 4.7            | 1187.08  | 4.7            | 1187.08     | 4.7         | TRUE         | TRUE              |
| 1     | VIGIINNVT  | 1111  | 1119 | 9              | HLA-A*02:01 | 1111          | 5              | 1299.39  | 5              | 1299.39     | 5           | TRUE         | TRUE              |
| 1     | TSVDNCMYI  | 716   | 724  | 9              | HLA-A*02:01 | 716           | 5              | 1314.15  | 5              | 1314.15     | 5           | TRUE         | TRUE              |
| 1     | GINASVVNI  | 1153  | 1161 | 9              | HLA-A*02:01 | 1153          | 5.1            | 1346.83  | 5.1            | 1346.83     | 5.1         | TRUE         | TRUE              |
| 1     | GIGYQPYRV  | 488   | 496  | 9              | HLA-A*02:01 | 488           | 5.2            | 1383.29  | 5.2            | 1383.29     | 5.2         | TRUE         | TRUE              |
| 1     | QLNRALSGI  | 744   | 752  | 9              | HLA-A*02:01 | 744           | 5.2            | 1406.79  | 5.2            | 1406.79     | 5.2         | TRUE         | TRUE              |
| 1     | PLAEKCSV   | 282   | 290  | 9              | HLA-A*02:01 | 282           | 5.3            | 1451.87  | 5.3            | 1451.87     | 5.3         | TRUE         | TRUE              |
| 1     | VLVYQDVNCT | 596   | 604  | 9              | HLA-A*02:01 | 596           | 5.3            | 1463.83  | 5.3            | 1463.83     | 5.3         | TRUE         | TRUE              |
| 1     | WTFGAGAAI  | 868   | 876  | 9              | HLA-A*02:01 | 868           | 5.3            | 1468.2   | 5.3            | 1468.2      | 5.3         | TRUE         | TRUE              |
| 1     | CTFEYISDA  | 159   | 167  | 9              | HLA-A*02:01 | 159           | 5.4            | 1478.53  | 5.4            | 1478.53     | 5.4         | TRUE         | TRUE              |
| 1     | QIAPGQTGV  | 396   | 404  | 9              | HLA-A*02:01 | 396           | 5.4            | 1487.84  | 5.4            | 1487.84     | 5.4         | TRUE         | TRUE              |
| 1     | VYTQQLIRA  | 989   | 997  | 9              | HLA-A*02:01 | 989           | 5.6            | 1577.6   | 5.6            | 1577.6      | 5.6         | TRUE         | TRUE              |
| 1     | WLGFIAGLI  | 1199  | 1207 | 9              | HLA-A*02:01 | 1199          | 5.6            | 1603.03  | 5.6            | 1603.03     | 5.6         | TRUE         | TRUE              |
| 1     | QYIKWPWYV  | 1190  | 1198 | 9              | HLA-A*02:01 | 1190          | 5.6            | 1620.14  | 5.6            | 1620.14     | 5.6         | TRUE         | TRUE              |
| 1     | ALNTLVKQL  | 940   | 948  | 9              | HLA-A*02:01 | 940           | 5.7            | 1633.23  | 5.7            | 1633.23     | 5.7         | TRUE         | TRUE              |
| 1     | LITGRLOSL  | 978   | 986  | 9              | HLA-A*02:01 | 978           | 5.7            | 1675.27  | 5.7            | 1675.27     | 5.7         | TRUE         | TRUE              |
| 1     | LLFLTLSG   | 5     | 13   | 9              | HLA-A*02:01 | 5             | 5.7            | 1676.81  | 5.7            | 1676.81     | 5.7         | TRUE         | TRUE              |
| 1     | AVDCSONPL  | 275   | 283  | 9              | HLA-A*02:01 | 275           | 5.8            | 1719.38  | 5.8            | 1719.38     | 5.8         | TRUE         | TRUE              |
| 1     | VNMVTILCC  | 1210  | 1218 | 9              | HLA-A*02:01 | 1210          | 5.9            | 1723.82  | 5.9            | 1723.82     | 5.9         | TRUE         | TRUE              |
| 1     | IAAYTAALV  | 852   | 860  | 9              | HLA-A*02:01 | 852           | 6              | 1800.7   | 6              | 1800.7      | 6           | TRUE         | TRUE              |
| 1     | QLSSNFAGI  | 947   | 955  | 9              | HLA-A*02:01 | 947           | 6              | 1808.71  | 6              | 1808.71     | 6           | TRUE         | TRUE              |
| 1     | AISSVLNDI  | 954   | 962  | 9              | HLA-A*02:01 | 954           | 6.1            | 1829.77  | 6.1            | 1829.77     | 6.1         | TRUE         | TRUE              |
| 1     | FVFNQTSWF  | 1077  | 1085 | 9              | HLA-A*02:01 | 1077          | 6.1            | 1869.65  | 6.1            | 1869.65     | 6.1         | TRUE         | TRUE              |
| 1     | YTAALVSGT  | 855   | 863  | 9              | HLA-A*02:01 | 855           | 6.3            | 1924.22  | 6.3            | 1924.22     | 6.3         | TRUE         | TRUE              |
| 1     | AAAYFVGYL  | 249   | 257  | 9              | HLA-A*02:01 | 249           | 6.4            | 1975.49  | 6.4            | 1975.49     | 6.4         | TRUE         | TRUE              |
| 1     | VWLGFIAGL  | 1198  | 1206 | 9              | HLA-A*02:01 | 1198          | 6.5            | 2036.12  | 6.5            | 2036.12     | 6.5         | TRUE         | TRUE              |
| 1     | ILPDPKPT   | 787   | 795  | 9              | HLA-A*02:01 | 787           | 6.5            | 2037.13  | 6.5            | 2037.13     | 6.5         | TRUE         | TRUE              |
| 1     | FOTQAGGCI  | 629   | 637  | 9              | HLA-A*02:01 | 629           | 6.7            | 2136.71  | 6.7            | 2136.71     | 6.7         | TRUE         | TRUE              |
| 1     | LCDNPFPAV  | 132   | 140  | 9              | HLA-A*02:01 | 132           | 6.9            | 2259.03  | 6.9            | 2259.03     | 6.9         | TRUE         | TRUE              |
| 1     | AISQIQESL  | 912   | 920  | 9              | HLA-A*02:01 | 912           | 7.1            | 2333.11  | 7.1            | 2333.11     | 7.1         | TRUE         | TRUE              |
| 1     | MFIFLLFLT  | 1     | 9    | 9              | HLA-A*02:01 | 1             | 7.1            | 2359.69  | 7.1            | 2359.69     | 7.1         | TRUE         | TRUE              |
| 1     | FMLKYDENG  | 262   | 270  | 9              | HLA-A*02:01 | 262           | 7.3            | 2462.27  | 7.3            | 2462.27     | 7.3         | TRUE         | TRUE              |
| 1     | LFLPFYSNV  | 58    | 66   | 9              | HLA-A*02:01 | 58            | 7.3            | 2506     | 7.3            | 2506        | 7.3         | TRUE         | TRUE              |
| 1     | AALQIPFAM  | 874   | 882  | 9              | HLA-A*02:01 | 874           | 7.4            | 2535.79  | 7.4            | 2535.79     | 7.4         | TRUE         | TRUE              |
| 1     | VYVWLGFIAG | 1197  | 1205 | 9              | HLA-A*02:01 | 1197          | 7.5            | 2568.76  | 7.5            | 2568.76     | 7.5</       |              |                   |

| seq # | peptide    | start | end  | peptide length | allele      | peptide index | median binding | ann IC50 | ann percentile | legacy IC50 | legacy rank | scores equal | percentiles equal |
|-------|------------|-------|------|----------------|-------------|---------------|----------------|----------|----------------|-------------|-------------|--------------|-------------------|
| 1     | FMGCVLAWN  | 416   | 424  | 9              | HLA-A*02:01 | 416           | 7.6            | 2674.95  | 7.6            | 2674.95     | 7.6         | TRUE         | TRUE              |
| 1     | LLLOYGSFC  | 734   | 742  | 9              | HLA-A*02:01 | 734           | 7.7            | 2742.92  | 7.7            | 2742.92     | 7.7         | TRUE         | TRUE              |
| 1     | SIAYSNNTI  | 686   | 694  | 9              | HLA-A*02:01 | 686           | 8              | 2910.15  | 8              | 2910.15     | 8           | TRUE         | TRUE              |
| 1     | SUDLQELG   | 1178  | 1186 | 9              | HLA-A*02:01 | 1178          | 8.1            | 2973.3   | 8.1            | 2973.3      | 8.1         | TRUE         | TRUE              |
| 1     | ELDSFKEEL  | 1126  | 1134 | 9              | HLA-A*02:01 | 1126          | 8.1            | 3001.36  | 8.1            | 3001.36     | 8.1         | TRUE         | TRUE              |
| 1     | MYTILLCCM  | 1211  | 1219 | 9              | HLA-A*02:01 | 1211          | 8.4            | 3125.64  | 8.4            | 3125.64     | 8.4         | TRUE         | TRUE              |
| 1     | ISDAFSLDV  | 164   | 172  | 9              | HLA-A*02:01 | 164           | 8.4            | 3153.15  | 8.4            | 3153.15     | 8.4         | TRUE         | TRUE              |
| 1     | KLPLGINIT  | 221   | 229  | 9              | HLA-A*02:01 | 221           | 8.5            | 3200.59  | 8.5            | 3200.59     | 8.5         | TRUE         | TRUE              |
| 1     | FITQRNFFS  | 1085  | 1093 | 9              | HLA-A*02:01 | 1085          | 8.7            | 3306.75  | 8.7            | 3306.75     | 8.7         | TRUE         | TRUE              |
| 1     | KLNDLCFSN  | 373   | 381  | 9              | HLA-A*02:01 | 373           | 8.7            | 3317     | 8.7            | 3317        | 8.7         | TRUE         | TRUE              |
| 1     | NTLKPFIKL  | 214   | 222  | 9              | HLA-A*02:01 | 214           | 8.9            | 3454.35  | 8.9            | 3454.35     | 8.9         | TRUE         | TRUE              |
| 1     | GFIAGLIAI  | 1201  | 1209 | 9              | HLA-A*02:01 | 1201          | 9              | 3496.47  | 9              | 3496.47     | 9           | TRUE         | TRUE              |
| 1     | AAPHGVVFL  | 1037  | 1045 | 9              | HLA-A*02:01 | 1037          | 9.1            | 3528.66  | 9.1            | 3528.66     | 9.1         | TRUE         | TRUE              |
| 1     | VVVLSEFLL  | 496   | 504  | 9              | HLA-A*02:01 | 496           | 9.1            | 3574.54  | 9.1            | 3574.54     | 9.1         | TRUE         | TRUE              |
| 1     | FKDGIYFAA  | 83    | 91   | 9              | HLA-A*02:01 | 83            | 9.3            | 3682.77  | 9.3            | 3682.77     | 9.3         | TRUE         | TRUE              |
| 1     | MQMAYRFNG  | 882   | 890  | 9              | HLA-A*02:01 | 882           | 9.3            | 3716     | 9.3            | 3716        | 9.3         | TRUE         | TRUE              |
| 1     | VVIGIINT   | 1110  | 1118 | 9              | HLA-A*02:01 | 1110          | 9.5            | 3845.5   | 9.5            | 3845.5      | 9.5         | TRUE         | TRUE              |
| 1     | LQTYVTQQL  | 986   | 994  | 9              | HLA-A*02:01 | 986           | 9.6            | 3910.02  | 9.6            | 3910.02     | 9.6         | TRUE         | TRUE              |
| 1     | SLGADSSIA  | 680   | 688  | 9              | HLA-A*02:01 | 680           | 9.7            | 3949.05  | 9.7            | 3949.05     | 9.7         | TRUE         | TRUE              |
| 1     | KMSECVLGQ  | 1010  | 1018 | 9              | HLA-A*02:01 | 1010          | 9.8            | 4047.12  | 9.8            | 4047.12     | 9.8         | TRUE         | TRUE              |
| 1     | IAIVMVTIL  | 1207  | 1215 | 9              | HLA-A*02:01 | 1207          | 9.9            | 4092.03  | 9.9            | 4092.03     | 9.9         | TRUE         | TRUE              |
| 1     | FAMQMAYRF  | 880   | 888  | 9              | HLA-A*02:01 | 880           | 11             | 4263.5   | 11             | 4263.5      | 11          | TRUE         | TRUE              |
| 1     | VAYTMSLGA  | 675   | 683  | 9              | HLA-A*02:01 | 675           | 12             | 4409.45  | 12             | 4409.45     | 12          | TRUE         | TRUE              |
| 1     | VFNGTSWFI  | 1078  | 1086 | 9              | HLA-A*02:01 | 1078          | 12             | 4422.26  | 12             | 4422.26     | 12          | TRUE         | TRUE              |
| 1     | IKWPWYVWL  | 1192  | 1200 | 9              | HLA-A*02:01 | 1192          | 12             | 4469.74  | 12             | 4469.74     | 12          | TRUE         | TRUE              |
| 1     | GAALQIPFA  | 873   | 881  | 9              | HLA-A*02:01 | 873           | 12             | 4492.48  | 12             | 4492.48     | 12          | TRUE         | TRUE              |
| 1     | ASYHTVSL   | 658   | 666  | 9              | HLA-A*02:01 | 658           | 12             | 4557.1   | 12             | 4557.1      | 12          | TRUE         | TRUE              |
| 1     | TILLCCMTS  | 1213  | 1221 | 9              | HLA-A*02:01 | 1213          | 12             | 4600.05  | 12             | 4600.05     | 12          | TRUE         | TRUE              |
| 1     | NMYICGDST  | 721   | 729  | 9              | HLA-A*02:01 | 721           | 12             | 4715.71  | 12             | 4715.71     | 12          | TRUE         | TRUE              |
| 1     | ELGKYEQYI  | 1184  | 1192 | 9              | HLA-A*02:01 | 1184          | 12             | 4787.32  | 12             | 4787.32     | 12          | TRUE         | TRUE              |
| 1     | YGFYTTTGI  | 481   | 489  | 9              | HLA-A*02:01 | 481           | 12             | 4807.2   | 12             | 4807.2      | 12          | TRUE         | TRUE              |
| 1     | GINITNFRA  | 225   | 233  | 9              | HLA-A*02:01 | 225           | 12             | 4954.26  | 12             | 4954.26     | 12          | TRUE         | TRUE              |
| 1     | FSQILPDPL  | 784   | 792  | 9              | HLA-A*02:01 | 784           | 13             | 5056.67  | 13             | 5056.67     | 13          | TRUE         | TRUE              |
| 1     | QQIIRAAEI  | 992   | 1000 | 9              | HLA-A*02:01 | 992           | 13             | 5078.32  | 13             | 5078.32     | 13          | TRUE         | TRUE              |
| 1     | LLCCMTSCC  | 1215  | 1223 | 9              | HLA-A*02:01 | 1215          | 13             | 5179.09  | 13             | 5179.09     | 13          | TRUE         | TRUE              |
| 1     | PALNCYWPL  | 470   | 478  | 9              | HLA-A*02:01 | 470           | 13             | 5293.19  | 13             | 5293.19     | 13          | TRUE         | TRUE              |
| 1     | NTRVFFAQV  | 759   | 767  | 9              | HLA-A*02:01 | 759           | 13             | 5448.1   | 13             | 5448.1      | 13          | TRUE         | TRUE              |
| 1     | AGLIAIVMV  | 1204  | 1212 | 9              | HLA-A*02:01 | 1204          | 13             | 5595.06  | 13             | 5595.06     | 13          | TRUE         | TRUE              |
| 1     | TLVLTQDLF  | 51    | 59   | 9              | HLA-A*02:01 | 51            | 14             | 5741.19  | 14             | 5741.19     | 14          | TRUE         | TRUE              |
| 1     | IFLLFLTIT  | 3     | 11   | 9              | HLA-A*02:01 | 3             | 14             | 5801.83  | 14             | 5801.83     | 14          | TRUE         | TRUE              |
| 1     | FLVYKGYQY  | 193   | 201  | 9              | HLA-A*02:01 | 193           | 14             | 5906.21  | 14             | 5906.21     | 14          | TRUE         | TRUE              |
| 1     | KEIDRLNEV  | 1163  | 1171 | 9              | HLA-A*02:01 | 1163          | 14             | 6029.01  | 14             | 6029.01     | 14          | TRUE         | TRUE              |
| 1     | ILDISPCSF  | 570   | 578  | 9              | HLA-A*02:01 | 570           | 14             | 6194.59  | 14             | 6194.59     | 14          | TRUE         | TRUE              |
| 1     | SNFGAIVSV  | 950   | 958  | 9              | HLA-A*02:01 | 950           | 14             | 6207.81  | 14             | 6207.81     | 14          | TRUE         | TRUE              |
| 1     | NGLTVLPL   | 838   | 846  | 9              | HLA-A*02:01 | 838           | 14             | 6240.94  | 14             | 6240.94     | 14          | TRUE         | TRUE              |
| 1     | GLTGTGLVT  | 531   | 539  | 9              | HLA-A*02:01 | 531           | 14             | 6273.84  | 14             | 6273.84     | 14          | TRUE         | TRUE              |
| 1     | TALGKLQDV  | 925   | 933  | 9              | HLA-A*02:01 | 925           | 14             | 6323.53  | 14             | 6323.53     | 14          | TRUE         | TRUE              |
| 1     | FAATEKSNV  | 89    | 97   | 9              | HLA-A*02:01 | 89            | 15             | 6445.23  | 15             | 6445.23     | 15          | TRUE         | TRUE              |
| 1     | NAQALNTLV  | 937   | 945  | 9              | HLA-A*02:01 | 937           | 15             | 6555.94  | 15             | 6555.94     | 15          | TRUE         | TRUE              |
| 1     | VTILLCCMT  | 1212  | 1220 | 9              | HLA-A*02:01 | 1212          | 15             | 6570.5   | 15             | 6570.5      | 15          | TRUE         | TRUE              |
| 1     | DISGINASV  | 1150  | 1158 | 9              | HLA-A*02:01 | 1150          | 15             | 6745.18  | 15             | 6745.18     | 15          | TRUE         | TRUE              |
| 1     | FKPLIGINI  | 220   | 228  | 9              | HLA-A*02:01 | 220           | 15             | 6821.73  | 15             | 6821.73     | 15          | TRUE         | TRUE              |
| 1     | DLPSGFNTL  | 208   | 216  | 9              | HLA-A*02:01 | 208           | 15             | 6837.1   | 15             | 6837.1      | 15          | TRUE         | TRUE              |
| 1     | AODIWGTSA  | 241   | 249  | 9              | HLA-A*02:01 | 241           | 15             | 6897.95  | 15             | 6897.95     | 15          | TRUE         | TRUE              |
| 1     | CSFGGVSVI  | 576   | 584  | 9              | HLA-A*02:01 | 576           | 15             | 7045.19  | 15             | 7045.19     | 15          | TRUE         | TRUE              |
| 1     | VMPVSMAKT  | 708   | 716  | 9              | HLA-A*02:01 | 708           | 15             | 7054.87  | 15             | 7054.87     | 15          | TRUE         | TRUE              |
| 1     | STFFSTFKC  | 358   | 366  | 9              | HLA-A*02:01 | 358           | 16             | 7194.17  | 16             | 7194.17     | 16          | TRUE         | TRUE              |
| 1     | KSFEIDKGI  | 291   | 299  | 9              | HLA-A*02:01 | 291           | 16             | 7219.35  | 16             | 7219.35     | 16          | TRUE         | TRUE              |
| 1     | STECANLLL  | 728   | 736  | 9              | HLA-A*02:01 | 728           | 16             | 7497.25  | 16             | 7497.25     | 16          | TRUE         | TRUE              |
| 1     | MSLGADSSI  | 679   | 687  | 9              | HLA-A*02:01 | 679           | 16             | 7625.78  | 16             | 7625.78     | 16          | TRUE         | TRUE              |
| 1     | LQDVVNQNA  | 930   | 938  | 9              | HLA-A*02:01 | 930           | 16             | 7661.76  | 16             | 7661.76     | 16          | TRUE         | TRUE              |
| 1     | DVSDFTDSV  | 554   | 562  | 9              | HLA-A*02:01 | 554           | 17             | 7938.29  | 17             | 7938.29     | 17          | TRUE         | TRUE              |
| 1     | LTQDLFLPF  | 54    | 62   | 9              | HLA-A*02:01 | 54            | 17             | 8106.15  | 17             | 8106.15     | 17          | TRUE         | TRUE              |
| 1     | VOIDRLITG  | 973   | 981  | 9              | HLA-A*02:01 | 973           | 17             | 8170.43  | 17             | 8170.43     | 17          | TRUE         | TRUE              |
| 1     | DLGFSNVYA  | 376   | 384  | 9              | HLA-A*02:01 | 376           | 17             | 8197.17  | 17             | 8197.17     | 17          | TRUE         | TRUE              |
| 1     | FIEDLLFNK  | 799   | 807  | 9              | HLA-A*02:01 | 799           | 17             | 8286.79  | 17             | 8286.79     | 17          | TRUE         | TRUE              |
| 1     | DLFLNKVTL  | 802   | 810  | 9              | HLA-A*02:01 | 802           | 17             | 8350.43  | 17             | 8350.43     | 17          | TRUE         | TRUE              |
| 1     | DIWGTSAASA | 243   | 251  | 9              | HLA-A*02:01 | 243           | 17             | 8398.91  | 17             | 8398.91     | 17          | TRUE         | TRUE              |
| 1     | FFSPQIITT  | 1091  | 1099 | 9              | HLA-A*02:01 | 1091          | 17             | 8456.81  | 17             | 8456.81     | 17          | TRUE         | TRUE              |
| 1     | DMIAAYTAA  | 850   | 858  | 9              | HLA-A*02:01 | 850           | 17             | 8489.72  | 17             | 8489.72     | 17          | TRUE         | TRUE              |
| 1     | ILTAFSPAQ  | 234   | 242  | 9              | HLA-A*02:01 | 234           | 17             | 8494.96  | 17             | 8494.96     | 17          | TRUE         | TRUE              |
| 1     | QIQESLTTT  | 915   | 923  | 9              | HLA-A*02:01 | 915           | 17             | 8616.79  | 17             | 8616.79     | 17          | TRUE         | TRUE              |
| 1     | AFNCTFEYI  | 156   | 164  | 9              | HLA-A*02:01 | 156           | 17             | 8641.06  | 17             | 8641.06     | 17          | TRUE         | TRUE              |
| 1     | YFPREGVFV  | 1070  | 1078 | 9              | HLA-A*02:01 | 1070          | 18             | 8723.82  | 18             | 8723.82     | 18          | TRUE         | TRUE              |
| 1     | CVNPNFNGL  | 524   | 532  | 9              | HLA-A*02:01 | 524           | 18             | 8779.02  | 18             | 8779.02     | 18          | TRUE         | TRUE              |
| 1     | PIFKLPLGI  | 218   | 226  | 9              | HLA-A*02:01 | 218           | 18             | 9026.57  | 18             | 9026.57     | 18          | TRUE         | TRUE              |
| 1     | KLRPFERDI  | 447   | 455  | 9              | HLA-A*02:01 | 447           | 18             | 9035.84  | 18             | 9035.84     | 18          | TRUE         | TRUE              |
| 1     | FVGYLKPTT  | 253   | 261  | 9              | HLA-A*02:01 | 253           | 18             | 9139.98  | 18             | 9139.98     | 18          | TRUE         | TRUE              |
| 1     | SQKSIVAYT  | 670   | 678  | 9              | HLA-A*02:01 | 670           | 18             | 9150.26  | 18             | 9150.26     | 18          | TRUE         | TRUE              |
| 1     | IAGLIAIVM  | 1203  | 1211 | 9              | HLA-A*02:01 | 1203          | 18             | 9186.67  | 18             | 9186.67     | 18          | TRUE         | TRUE              |
| 1     | SISITTEVM  | 701   | 709  | 9              | HLA-A*02:01 | 701           | 18             | 9359.54  | 18             | 9359.54     | 18          | TRUE         | TRUE              |
| 1     | ALNCYWPLN  | 471   | 479  | 9              | HLA-A*02:01 | 471           | 18             | 9365.42  | 18             | 9365.42     | 18          | TRUE         | TRUE              |
| 1     | QTYVTQOQU  | 987   | 995  | 9              | HLA-A*02:01 | 987           | 19             | 9449.7   | 19             | 9449.7      | 19          | TRUE         | TRUE              |
| 1     | KAYFPREGV  | 1068  | 1076 | 9              | HLA-A*02:01 | 1068          | 19             | 9501.68  | 19             | 9501.68     | 19          | TRUE         | TRUE              |
| 1     | FRSDTLTLY  | 47    | 55   | 9              | HLA-A*02:01 | 47            | 19             | 9602.76  | 19             | 9602.76     | 19          | TRUE         | TRUE              |
| 1     | CASYHTVSL  | 657   | 665  | 9              | HLA-A*02:01 | 657           | 19             | 9770.02  | 19             | 9770.02     | 19          | TRUE         | TRUE              |
| 1     | FAVSKPMGT  | 138   | 146  | 9              | HLA-A*02:01 | 138           | 19             | 9917.21  | 19             | 9917.21     | 19          | TRUE         | TRUE              |
| 1     | YECIDIPIGA | 646   | 654  | 9              | HLA-A*02:01 | 646           | 19             | 9971.65  | 19             | 9971.65     | 19          | TRUE         | TRUE              |
| 1     | SVIHNNTST  | 113   | 121  | 9              | HLA-A*02:01 | 113           | 19             | 10133.05 | 19             | 10133.05    | 19          | TRUE         | TRUE              |
| 1     | SQIQESLTT  | 914   | 922  | 9              | HLA-A*02:01 | 914           | 20             | 10249.72 | 20             | 10249.72    | 20          | TRUE         | TRUE              |
| 1     | KCSVKSFEI  | 287   | 295  | 9              | HLA-A*02:01 | 287           | 20             | 10279.26 | 20             | 10279.26    | 20          | TRUE         | TRUE              |
| 1     | YICGDSTEC  | 723   | 731  | 9              | HLA-A*02:01 | 723           | 20             | 10316.7  | 20             | 10316.7     | 20          | TRUE         | TRUE              |
| 1     | GCUGAEHV   | 634   | 642  | 9              | HLA-A*02:01 | 634           | 20             | 10325.63 | 20             | 10325.63    | 20          | TRUE         | TRUE              |
| 1     | AQKFNGLTIV | 834   | 842  | 9              | HLA-A*02:01 | 834           | 20             | 10368.17 | 20             | 10368.17    | 20          | TRUE         | TRUE              |
| 1     | QIPFAMQMA  | 877   | 885  | 9              | HLA-A*02:01 | 877           | 20             | 10423.73 | 20             | 10423.73    | 20          | TRUE         | TRUE              |
| 1     | FGAGAAALQI | 870   | 878  | 9              | HLA-A*02:01 | 870           | 20             | 10636.91 | 20             | 10636.91    | 20          | TRUE         | TRUE              |
| 1     | ALSGIAAEQ  | 748   | 756  | 9              | HLA-A*02:01 | 748           | 20             | 10705.48 | 20             | 10705.48    | 20          | TRUE         | TRUE              |
| 1     | NITNFRAIL  | 227   | 235  | 9              | HLA-A*02:01 | 227           | 20             | 10801.48 | 20             | 10801.48    | 20          | TRUE         | TRUE              |
| 1     | YFVGVLKPT  | 252   | 260  | 9              | HLA-A*02:01 | 252           | 20             | 10835.89 | 20             | 10835.89    | 20          | TRUE         | TRUE              |
| 1     | SVVNIQKEI  | 1157  |      |                |             |               |                |          |                |             |             |              |                   |

| seq # | peptide     | start | end  | peptide length | allele      | peptide index | median binding | ann IC50 | ann percentile | legacy IC50 | legacy rank | scores equal | percentiles equal |
|-------|-------------|-------|------|----------------|-------------|---------------|----------------|----------|----------------|-------------|-------------|--------------|-------------------|
| 1     | GVSVITPGT   | 580   | 588  | 9              | HLA-A*02:01 | 580           | 21             | 11201.74 | 21             | 11201.74    | 21          | TRUE         | TRUE              |
| 1     | FPOAAPHG    | 1034  | 1042 | 9              | HLA-A*02:01 | 1034          | 21             | 11255.93 | 21             | 11255.93    | 21          | TRUE         | TRUE              |
| 1     | FDEDDSEPV   | 1238  | 1246 | 9              | HLA-A*02:01 | 1238          | 21             | 11257.51 | 21             | 11257.51    | 21          | TRUE         | TRUE              |
| 1     | RAAEIRASA   | 996   | 1004 | 9              | HLA-A*02:01 | 996           | 21             | 11342.37 | 21             | 11342.37    | 21          | TRUE         | TRUE              |
| 1     | ISPCSFGGV   | 573   | 581  | 9              | HLA-A*02:01 | 573           | 21             | 11554.05 | 21             | 11554.05    | 21          | TRUE         | TRUE              |
| 1     | NLCPFGEVF   | 321   | 329  | 9              | HLA-A*02:01 | 321           | 21             | 11598.13 | 21             | 11598.13    | 21          | TRUE         | TRUE              |
| 1     | SVDCNMYIC   | 717   | 725  | 9              | HLA-A*02:01 | 717           | 22             | 11729.76 | 22             | 11729.76    | 22          | TRUE         | TRUE              |
| 1     | AATEKSNVV   | 90    | 98   | 9              | HLA-A*02:01 | 90            | 22             | 11753.9  | 22             | 11753.9     | 22          | TRUE         | TRUE              |
| 1     | SVLYNSTFF   | 353   | 361  | 9              | HLA-A*02:01 | 353           | 22             | 11760.01 | 22             | 11760.01    | 22          | TRUE         | TRUE              |
| 1     | FNFNGLTGT   | 527   | 535  | 9              | HLA-A*02:01 | 527           | 22             | 11889.74 | 22             | 11889.74    | 22          | TRUE         | TRUE              |
| 1     | RVVPSGDVV   | 306   | 314  | 9              | HLA-A*02:01 | 306           | 22             | 11982.21 | 22             | 11982.21    | 22          | TRUE         | TRUE              |
| 1     | CVLGQSKRV   | 1014  | 1022 | 9              | HLA-A*02:01 | 1014          | 22             | 12186.56 | 22             | 12186.56    | 22          | TRUE         | TRUE              |
| 1     | WVYVWLGFA   | 1196  | 1204 | 9              | HLA-A*02:01 | 1196          | 22             | 12220.1  | 22             | 12220.1     | 22          | TRUE         | TRUE              |
| 1     | SMAKTSVDC   | 712   | 720  | 9              | HLA-A*02:01 | 712           | 22             | 12272.58 | 22             | 12272.58    | 22          | TRUE         | TRUE              |
| 1     | GIGVTQNVL   | 890   | 898  | 9              | HLA-A*02:01 | 890           | 23             | 12465.29 | 23             | 12465.29    | 23          | TRUE         | TRUE              |
| 1     | TQDLFLPFY   | 55    | 63   | 9              | HLA-A*02:01 | 55            | 23             | 12502.84 | 23             | 12502.84    | 23          | TRUE         | TRUE              |
| 1     | WPWVYVWLGF  | 1194  | 1202 | 9              | HLA-A*02:01 | 1194          | 23             | 12528.43 | 23             | 12528.43    | 23          | TRUE         | TRUE              |
| 1     | LYLTQDLFL   | 52    | 60   | 9              | HLA-A*02:01 | 52            | 23             | 12607.43 | 23             | 12607.43    | 23          | TRUE         | TRUE              |
| 1     | GNCDVVGII   | 1106  | 1114 | 9              | HLA-A*02:01 | 1106          | 23             | 12675.55 | 23             | 12675.55    | 23          | TRUE         | TRUE              |
| 1     | ALQIPFAMQ   | 875   | 883  | 9              | HLA-A*02:01 | 875           | 23             | 12721.72 | 23             | 12721.72    | 23          | TRUE         | TRUE              |
| 1     | FCGKGYHLM   | 1024  | 1032 | 9              | HLA-A*02:01 | 1024          | 23             | 12753.41 | 23             | 12753.41    | 23          | TRUE         | TRUE              |
| 1     | YHLMSPQOA   | 1029  | 1037 | 9              | HLA-A*02:01 | 1029          | 23             | 12764.45 | 23             | 12764.45    | 23          | TRUE         | TRUE              |
| 1     | LQSLQTYVT   | 983   | 991  | 9              | HLA-A*02:01 | 983           | 23             | 12769.85 | 23             | 12769.85    | 23          | TRUE         | TRUE              |
| 1     | NLLLOYGSF   | 733   | 741  | 9              | HLA-A*02:01 | 733           | 23             | 12869.44 | 23             | 12869.44    | 23          | TRUE         | TRUE              |
| 1     | PLTTDDMIA   | 845   | 853  | 9              | HLA-A*02:01 | 845           | 23             | 12869.44 | 23             | 12869.44    | 23          | TRUE         | TRUE              |
| 1     | LGFIAGLIA   | 1200  | 1208 | 9              | HLA-A*02:01 | 1200          | 23             | 12989.46 | 23             | 12989.46    | 23          | TRUE         | TRUE              |
| 1     | STGNNVFQT   | 623   | 631  | 9              | HLA-A*02:01 | 623           | 24             | 13116.85 | 24             | 13116.85    | 24          | TRUE         | TRUE              |
| 1     | YTMSLGADS   | 677   | 685  | 9              | HLA-A*02:01 | 677           | 24             | 13160.35 | 24             | 13160.35    | 24          | TRUE         | TRUE              |
| 1     | LNLDLCSNV   | 374   | 382  | 9              | HLA-A*02:01 | 374           | 24             | 13337.68 | 24             | 13337.68    | 24          | TRUE         | TRUE              |
| 1     | DILSRDLKV   | 961   | 969  | 9              | HLA-A*02:01 | 961           | 24             | 13420.04 | 24             | 13420.04    | 24          | TRUE         | TRUE              |
| 1     | AGWTFGAGA   | 866   | 874  | 9              | HLA-A*02:01 | 866           | 24             | 13569.85 | 24             | 13569.85    | 24          | TRUE         | TRUE              |
| 1     | AATKMSCEV   | 1007  | 1015 | 9              | HLA-A*02:01 | 1007          | 24             | 13572.35 | 24             | 13572.35    | 24          | TRUE         | TRUE              |
| 1     | VVNQNAQAL   | 933   | 941  | 9              | HLA-A*02:01 | 933           | 24             | 13609.4  | 24             | 13609.4     | 24          | TRUE         | TRUE              |
| 1     | HLREFVFKN   | 181   | 189  | 9              | HLA-A*02:01 | 181           | 24             | 13623.84 | 24             | 13623.84    | 24          | TRUE         | TRUE              |
| 1     | CSQNPLAEL   | 278   | 286  | 9              | HLA-A*02:01 | 278           | 24             | 13747.62 | 24             | 13747.62    | 24          | TRUE         | TRUE              |
| 1     | FCTQLNRAL   | 741   | 749  | 9              | HLA-A*02:01 | 741           | 24             | 13758.94 | 24             | 13758.94    | 24          | TRUE         | TRUE              |
| 1     | RLITGRLOS   | 977   | 985  | 9              | HLA-A*02:01 | 977           | 24             | 13798.74 | 24             | 13798.74    | 24          | TRUE         | TRUE              |
| 1     | SGFNTLKPI   | 211   | 219  | 9              | HLA-A*02:01 | 211           | 24             | 13799.49 | 24             | 13799.49    | 24          | TRUE         | TRUE              |
| 1     | HTMIFDNFA   | 149   | 157  | 9              | HLA-A*02:01 | 149           | 25             | 13940.56 | 25             | 13940.56    | 25          | TRUE         | TRUE              |
| 1     | LLNAPATVC   | 503   | 511  | 9              | HLA-A*02:01 | 503           | 25             | 13968.64 | 25             | 13968.64    | 25          | TRUE         | TRUE              |
| 1     | GGFNFSQIL   | 780   | 788  | 9              | HLA-A*02:01 | 780           | 25             | 14001.63 | 25             | 14001.63    | 25          | TRUE         | TRUE              |
| 1     | IAYSNTNTIA  | 687   | 695  | 9              | HLA-A*02:01 | 687           | 25             | 14156.55 | 25             | 14156.55    | 25          | TRUE         | TRUE              |
| 1     | TLADAGFMK   | 809   | 817  | 9              | HLA-A*02:01 | 809           | 25             | 14227.49 | 25             | 14227.49    | 25          | TRUE         | TRUE              |
| 1     | QIANQFNKA   | 904   | 912  | 9              | HLA-A*02:01 | 904           | 25             | 14253.52 | 25             | 14253.52    | 25          | TRUE         | TRUE              |
| 1     | IFRSDTLYL   | 46    | 54   | 9              | HLA-A*02:01 | 46            | 25             | 14269.57 | 25             | 14269.57    | 25          | TRUE         | TRUE              |
| 1     | RGWVFGSTM   | 99    | 107  | 9              | HLA-A*02:01 | 99            | 25             | 14422.78 | 25             | 14422.78    | 25          | TRUE         | TRUE              |
| 1     | KLQDVNVQN   | 929   | 937  | 9              | HLA-A*02:01 | 929           | 26             | 14583.15 | 26             | 14583.15    | 26          | TRUE         | TRUE              |
| 1     | CPFGGEVFA   | 323   | 331  | 9              | HLA-A*02:01 | 323           | 26             | 14616.32 | 26             | 14616.32    | 26          | TRUE         | TRUE              |
| 1     | MLKYDENGT   | 263   | 271  | 9              | HLA-A*02:01 | 263           | 26             | 14673.52 | 26             | 14673.52    | 26          | TRUE         | TRUE              |
| 1     | FNKNTHSPDV  | 1138  | 1146 | 9              | HLA-A*02:01 | 1138          | 26             | 14692.27 | 26             | 14692.27    | 26          | TRUE         | TRUE              |
| 1     | VYDPLQPEL   | 1119  | 1127 | 9              | HLA-A*02:01 | 1119          | 26             | 14708.49 | 26             | 14708.49    | 26          | TRUE         | TRUE              |
| 1     | IYQTSNFRV   | 299   | 307  | 9              | HLA-A*02:01 | 299           | 26             | 14767.02 | 26             | 14767.02    | 26          | TRUE         | TRUE              |
| 1     | VVRGWVFGS   | 97    | 105  | 9              | HLA-A*02:01 | 97            | 26             | 14834.27 | 26             | 14834.27    | 26          | TRUE         | TRUE              |
| 1     | VSGNCDVVI   | 1104  | 1112 | 9              | HLA-A*02:01 | 1104          | 26             | 14932.5  | 26             | 14932.5     | 26          | TRUE         | TRUE              |
| 1     | IEDLLFNKV   | 800   | 808  | 9              | HLA-A*02:01 | 800           | 26             | 14990.3  | 26             | 14990.3     | 26          | TRUE         | TRUE              |
| 1     | NASSEVAVL   | 589   | 597  | 9              | HLA-A*02:01 | 589           | 26             | 15001.98 | 26             | 15001.98    | 26          | TRUE         | TRUE              |
| 1     | PWYVWLGF    | 1195  | 1203 | 9              | HLA-A*02:01 | 1195          | 26             | 15025.04 | 26             | 15025.04    | 26          | TRUE         | TRUE              |
| 1     | LSFELNAP    | 499   | 507  | 9              | HLA-A*02:01 | 499           | 26             | 15054.17 | 26             | 15054.17    | 26          | TRUE         | TRUE              |
| 1     | KGYQPIDVV   | 198   | 206  | 9              | HLA-A*02:01 | 198           | 26             | 15107.21 | 26             | 15107.21    | 26          | TRUE         | TRUE              |
| 1     | ITNFRALIT   | 228   | 236  | 9              | HLA-A*02:01 | 228           | 26             | 15172.4  | 26             | 15172.4     | 26          | TRUE         | TRUE              |
| 1     | NCNDVIGII   | 1107  | 1115 | 9              | HLA-A*02:01 | 1107          | 26             | 15178.31 | 26             | 15178.31    | 26          | TRUE         | TRUE              |
| 1     | YADSFVVKG   | 383   | 391  | 9              | HLA-A*02:01 | 383           | 26             | 15190.79 | 26             | 15190.79    | 26          | TRUE         | TRUE              |
| 1     | AAYFVGULK   | 250   | 258  | 9              | HLA-A*02:01 | 250           | 26             | 15222.23 | 26             | 15222.23    | 26          | TRUE         | TRUE              |
| 1     | ITTEVMPVS   | 704   | 712  | 9              | HLA-A*02:01 | 704           | 27             | 15266.09 | 27             | 15266.09    | 27          | TRUE         | TRUE              |
| 1     | STAHADQL    | 607   | 615  | 9              | HLA-A*02:01 | 607           | 27             | 15277.66 | 27             | 15277.66    | 27          | TRUE         | TRUE              |
| 1     | SLQTYVTQQ   | 985   | 993  | 9              | HLA-A*02:01 | 985           | 27             | 15487.54 | 27             | 15487.54    | 27          | TRUE         | TRUE              |
| 1     | LPDDFMGCV   | 412   | 420  | 9              | HLA-A*02:01 | 412           | 27             | 15509.17 | 27             | 15509.17    | 27          | TRUE         | TRUE              |
| 1     | ICAQKFNGL   | 832   | 840  | 9              | HLA-A*02:01 | 832           | 27             | 15524.28 | 27             | 15524.28    | 27          | TRUE         | TRUE              |
| 1     | RSFIEDLLF   | 797   | 805  | 9              | HLA-A*02:01 | 797           | 27             | 15557.23 | 27             | 15557.23    | 27          | TRUE         | TRUE              |
| 1     | FSLDVSEKS   | 168   | 176  | 9              | HLA-A*02:01 | 168           | 27             | 15627.92 | 27             | 15627.92    | 27          | TRUE         | TRUE              |
| 1     | NINGIGVTQNV | 889   | 897  | 9              | HLA-A*02:01 | 889           | 27             | 15660.25 | 27             | 15660.25    | 27          | TRUE         | TRUE              |
| 1     | DLFLPFYSN   | 57    | 65   | 9              | HLA-A*02:01 | 57            | 27             | 15671.27 | 27             | 15671.27    | 27          | TRUE         | TRUE              |
| 1     | LTVLPPILT   | 840   | 848  | 9              | HLA-A*02:01 | 840           | 27             | 15684.84 | 27             | 15684.84    | 27          | TRUE         | TRUE              |
| 1     | LIRAAEIRA   | 994   | 1002 | 9              | HLA-A*02:01 | 994           | 27             | 15695.36 | 27             | 15695.36    | 27          | TRUE         | TRUE              |
| 1     | KWPVWYVWL   | 1193  | 1201 | 9              | HLA-A*02:01 | 1193          | 27             | 15755.43 | 27             | 15755.43    | 27          | TRUE         | TRUE              |
| 1     | CCMTSCCSC   | 1217  | 1225 | 9              | HLA-A*02:01 | 1217          | 27             | 15758.83 | 27             | 15758.83    | 27          | TRUE         | TRUE              |
| 1     | YSVLNYSFT   | 352   | 360  | 9              | HLA-A*02:01 | 352           | 27             | 15759.18 | 27             | 15759.18    | 27          | TRUE         | TRUE              |
| 1     | NAFNCTFEY   | 155   | 163  | 9              | HLA-A*02:01 | 155           | 27             | 15839.69 | 27             | 15839.69    | 27          | TRUE         | TRUE              |
| 1     | NIQKEIDRL   | 1160  | 1168 | 9              | HLA-A*02:01 | 1160          | 28             | 15911.67 | 28             | 15911.67    | 28          | TRUE         | TRUE              |
| 1     | LKPIFKLPL   | 216   | 224  | 9              | HLA-A*02:01 | 216           | 28             | 15981.2  | 28             | 15981.2     | 28          | TRUE         | TRUE              |
| 1     | FNLGTGTGV   | 529   | 537  | 9              | HLA-A*02:01 | 529           | 28             | 16061.8  | 28             | 16061.8     | 28          | TRUE         | TRUE              |
| 1     | VTOQLIRAA   | 990   | 998  | 9              | HLA-A*02:01 | 990           | 28             | 16105.66 | 28             | 16105.66    | 28          | TRUE         | TRUE              |
| 1     | STSQKSIVA   | 668   | 676  | 9              | HLA-A*02:01 | 668           | 28             | 16136    | 28             | 16136       | 28          | TRUE         | TRUE              |
| 1     | FGGFNFSQI   | 779   | 787  | 9              | HLA-A*02:01 | 779           | 28             | 16136.18 | 28             | 16136.18    | 28          | TRUE         | TRUE              |
| 1     | YSNVTGFHT   | 63    | 71   | 9              | HLA-A*02:01 | 63            | 28             | 16241.45 | 28             | 16241.45    | 28          | TRUE         | TRUE              |
| 1     | AQVKQMYKT   | 765   | 773  | 9              | HLA-A*02:01 | 765           | 28             | 16403.57 | 28             | 16403.57    | 28          | TRUE         | TRUE              |
| 1     | INHTFGNPT   | 72    | 80   | 9              | HLA-A*02:01 | 72            | 28             | 16426.31 | 28             | 16426.31    | 28          | TRUE         | TRUE              |
| 1     | KLSTDLIKN   | 514   | 522  | 9              | HLA-A*02:01 | 514           | 28             | 16471.51 | 28             | 16471.51    | 28          | TRUE         | TRUE              |
| 1     | LOYGSFCTQ   | 736   | 744  | 9              | HLA-A*02:01 | 736           | 28             | 16475.79 | 28             | 16475.79    | 28          | TRUE         | TRUE              |
| 1     | TNFRAILTA   | 229   | 237  | 9              | HLA-A*02:01 | 229           | 28             | 16482.03 | 28             | 16482.03    | 28          | TRUE         | TRUE              |
| 1     | NSTNVVIRA   | 119   | 127  | 9              | HLA-A*02:01 | 119           | 28             | 16593.15 | 28             | 16593.15    | 28          | TRUE         | TRUE              |
| 1     | DQLTPAWRI   | 613   | 621  | 9              | HLA-A*02:01 | 613           | 29             | 16621.54 | 29             | 16621.54    | 29          | TRUE         | TRUE              |
| 1     | ISSVINDIL   | 955   | 963  | 9              | HLA-A*02:01 | 955           | 29             | 16683.15 | 29             | 16683.15    | 29          | TRUE         | TRUE              |
| 1     | ISGINASVV   | 1151  | 1159 | 9              | HLA-A*02:01 | 1151          | 29             | 16723.28 | 29             | 16723.28    | 29          | TRUE         | TRUE              |
| 1     | VRFPNITNL   | 314   | 322  | 9              | HLA-A*02:01 | 314           | 29             | 16857.71 | 29             | 16857.71    | 29          | TRUE         | TRUE              |
| 1     | QKFNGLTVL   | 835   | 843  | 9              | HLA-A*02:01 | 835           | 29             | 16919.84 | 29             | 16919.84    | 29          | TRUE         | TRUE              |
| 1     | IPTNFSISI   | 696   | 704  | 9              | HLA-A*02:01 | 696           | 29             | 16964.38 | 29             | 16964.38    | 29          | TRUE         | TRUE              |
| 1     | YIKWVWYVW   | 1191  | 1199 | 9              | HLA-A*02:01 | 1191          | 29             | 17003.34 | 29             | 17003.34    | 29          | TRUE         | TRUE              |
| 1     | SFELNAPA    | 500</ |      |                |             |               |                |          |                |             |             |              |                   |

| seq # | peptide    | start | end  | peptide length | allele      | peptide index | median binding | ann IC50 | ann percentile | legacy IC50 | legacy rank | scores equal | percentiles equal |
|-------|------------|-------|------|----------------|-------------|---------------|----------------|----------|----------------|-------------|-------------|--------------|-------------------|
| 1     | MGCVLAWNT  | 417   | 425  | 9              | HLA-A*02:01 | 417           | 30             | 17484.31 | 30             | 17484.31    | 30          | TRUE         | TRUE              |
| 1     | STNNVIRAC  | 120   | 128  | 9              | HLA-A*02:01 | 120           | 30             | 17494.33 | 30             | 17494.33    | 30          | TRUE         | TRUE              |
| 1     | FRAILTAFS  | 231   | 239  | 9              | HLA-A*02:01 | 231           | 30             | 17540.01 | 30             | 17540.01    | 30          | TRUE         | TRUE              |
| 1     | GVFVFNGTS  | 1075  | 1083 | 9              | HLA-A*02:01 | 1075          | 30             | 17587.14 | 30             | 17587.14    | 30          | TRUE         | TRUE              |
| 1     | NCTDVSTAI  | 602   | 610  | 9              | HLA-A*02:01 | 602           | 30             | 17630.39 | 30             | 17630.39    | 30          | TRUE         | TRUE              |
| 1     | IANQFNKAI  | 905   | 913  | 9              | HLA-A*02:01 | 905           | 30             | 17632.87 | 30             | 17632.87    | 30          | TRUE         | TRUE              |
| 1     | GADSSIAYS  | 682   | 690  | 9              | HLA-A*02:01 | 682           | 30             | 17677.38 | 30             | 17677.38    | 30          | TRUE         | TRUE              |
| 1     | ATKFPSSVYA | 331   | 339  | 9              | HLA-A*02:01 | 331           | 30             | 17684.07 | 30             | 17684.07    | 30          | TRUE         | TRUE              |
| 1     | YKGYQPIDV  | 197   | 205  | 9              | HLA-A*02:01 | 197           | 30             | 17741.19 | 30             | 17741.19    | 30          | TRUE         | TRUE              |
| 1     | SSMRGVVYP  | 35    | 43   | 9              | HLA-A*02:01 | 35            | 30             | 17887.29 | 30             | 17887.29    | 30          | TRUE         | TRUE              |
| 1     | GVVFLHVTY  | 1041  | 1049 | 9              | HLA-A*02:01 | 1041          | 31             | 17901.22 | 31             | 17901.22    | 31          | TRUE         | TRUE              |
| 1     | YRVVVLSE   | 494   | 502  | 9              | HLA-A*02:01 | 494           | 31             | 18002.03 | 31             | 18002.03    | 31          | TRUE         | TRUE              |
| 1     | SVITPGTNA  | 582   | 590  | 9              | HLA-A*02:01 | 582           | 31             | 18160.3  | 31             | 18160.3     | 31          | TRUE         | TRUE              |
| 1     | CVADSVLY   | 348   | 356  | 9              | HLA-A*02:01 | 348           | 31             | 18163.24 | 31             | 18163.24    | 31          | TRUE         | TRUE              |
| 1     | HGVVFLHVT  | 1040  | 1048 | 9              | HLA-A*02:01 | 1040          | 31             | 18214.8  | 31             | 18214.8     | 31          | TRUE         | TRUE              |
| 1     | SMRGVYYPD  | 36    | 44   | 9              | HLA-A*02:01 | 36            | 31             | 18303.31 | 31             | 18303.31    | 31          | TRUE         | TRUE              |
| 1     | SNCVADYSV  | 346   | 354  | 9              | HLA-A*02:01 | 346           | 31             | 18476.62 | 31             | 18476.62    | 31          | TRUE         | TRUE              |
| 1     | FNGTLVLP   | 837   | 845  | 9              | HLA-A*02:01 | 837           | 32             | 18547.33 | 32             | 18547.33    | 32          | TRUE         | TRUE              |
| 1     | LTDDMIAAY  | 847   | 855  | 9              | HLA-A*02:01 | 847           | 32             | 18571.42 | 32             | 18571.42    | 32          | TRUE         | TRUE              |
| 1     | EVAVLYQDV  | 593   | 601  | 9              | HLA-A*02:01 | 593           | 32             | 18618.09 | 32             | 18618.09    | 32          | TRUE         | TRUE              |
| 1     | ESLDLQEL   | 1177  | 1185 | 9              | HLA-A*02:01 | 1177          | 32             | 18638.46 | 32             | 18638.46    | 32          | TRUE         | TRUE              |
| 1     | OKSVWAYTM  | 671   | 679  | 9              | HLA-A*02:01 | 671           | 32             | 18678.62 | 32             | 18678.62    | 32          | TRUE         | TRUE              |
| 1     | TMIFDNAFN  | 150   | 158  | 9              | HLA-A*02:01 | 150           | 32             | 18736.71 | 32             | 18736.71    | 32          | TRUE         | TRUE              |
| 1     | LTLTSGSDL  | 8     | 16   | 9              | HLA-A*02:01 | 8             | 32             | 18833.46 | 32             | 18833.46    | 32          | TRUE         | TRUE              |
| 1     | NVFTQOAGC  | 627   | 635  | 9              | HLA-A*02:01 | 627           | 32             | 18867.94 | 32             | 18867.94    | 32          | TRUE         | TRUE              |
| 1     | FKHLREFVF  | 179   | 187  | 9              | HLA-A*02:01 | 179           | 32             | 18887.33 | 32             | 18887.33    | 32          | TRUE         | TRUE              |
| 1     | PLGINITNF  | 223   | 231  | 9              | HLA-A*02:01 | 223           | 32             | 18949.15 | 32             | 18949.15    | 32          | TRUE         | TRUE              |
| 1     | VLKGVKLHY  | 1246  | 1254 | 9              | HLA-A*02:01 | 1246          | 32             | 18978.49 | 32             | 18978.49    | 32          | TRUE         | TRUE              |
| 1     | SOERNFTTA  | 1052  | 1060 | 9              | HLA-A*02:01 | 1052          | 32             | 18978.7  | 32             | 18978.7     | 32          | TRUE         | TRUE              |
| 1     | GTATAGWTF  | 862   | 870  | 9              | HLA-A*02:01 | 862           | 32             | 19075.05 | 32             | 19075.05    | 32          | TRUE         | TRUE              |
| 1     | FPREGVVFV  | 1071  | 1079 | 9              | HLA-A*02:01 | 1071          | 32             | 19145.96 | 32             | 19145.96    | 32          | TRUE         | TRUE              |
| 1     | DDFMGCVLA  | 414   | 422  | 9              | HLA-A*02:01 | 414           | 33             | 19239.01 | 33             | 19239.01    | 33          | TRUE         | TRUE              |
| 1     | VSATKLNDL  | 369   | 377  | 9              | HLA-A*02:01 | 369           | 33             | 19298.01 | 33             | 19298.01    | 33          | TRUE         | TRUE              |
| 1     | SCSCCLKGA  | 1221  | 1229 | 9              | HLA-A*02:01 | 1221          | 33             | 19298.42 | 33             | 19298.42    | 33          | TRUE         | TRUE              |
| 1     | KSNVVRGWV  | 94    | 102  | 9              | HLA-A*02:01 | 94            | 33             | 19318.48 | 33             | 19318.48    | 33          | TRUE         | TRUE              |
| 1     | VVLSEFELL  | 497   | 505  | 9              | HLA-A*02:01 | 497           | 33             | 19418.86 | 33             | 19418.86    | 33          | TRUE         | TRUE              |
| 1     | ASSEVAVLY  | 590   | 598  | 9              | HLA-A*02:01 | 590           | 33             | 19447.87 | 33             | 19447.87    | 33          | TRUE         | TRUE              |
| 1     | LMSFPQAAP  | 1031  | 1039 | 9              | HLA-A*02:01 | 1031          | 33             | 19502.44 | 33             | 19502.44    | 33          | TRUE         | TRUE              |
| 1     | TAALVSGTA  | 856   | 864  | 9              | HLA-A*02:01 | 856           | 33             | 19532.65 | 33             | 19532.65    | 33          | TRUE         | TRUE              |
| 1     | FEYISDAFS  | 161   | 169  | 9              | HLA-A*02:01 | 161           | 33             | 19569.46 | 33             | 19569.46    | 33          | TRUE         | TRUE              |
| 1     | SVLNDILSR  | 957   | 965  | 9              | HLA-A*02:01 | 957           | 33             | 19677.1  | 33             | 19677.1     | 33          | TRUE         | TRUE              |
| 1     | FSNVYADSF  | 379   | 387  | 9              | HLA-A*02:01 | 379           | 33             | 19687.32 | 33             | 19687.32    | 33          | TRUE         | TRUE              |
| 1     | LTPAWRIYS  | 615   | 623  | 9              | HLA-A*02:01 | 615           | 33             | 19751.97 | 33             | 19751.97    | 33          | TRUE         | TRUE              |
| 1     | SOSIHIINN  | 111   | 119  | 9              | HLA-A*02:01 | 111           | 34             | 19817.48 | 34             | 19817.48    | 34          | TRUE         | TRUE              |
| 1     | TTSTALGKL  | 922   | 930  | 9              | HLA-A*02:01 | 922           | 34             | 19868.36 | 34             | 19868.36    | 34          | TRUE         | TRUE              |
| 1     | FELCDNPF   | 130   | 138  | 9              | HLA-A*02:01 | 130           | 34             | 19881.25 | 34             | 19881.25    | 34          | TRUE         | TRUE              |
| 1     | YFGGFNFSQ  | 778   | 786  | 9              | HLA-A*02:01 | 778           | 34             | 19948.27 | 34             | 19948.27    | 34          | TRUE         | TRUE              |
| 1     | DFMGCVLAW  | 415   | 423  | 9              | HLA-A*02:01 | 415           | 34             | 20000.57 | 34             | 20000.57    | 34          | TRUE         | TRUE              |
| 1     | TAFSPAQDI  | 236   | 244  | 9              | HLA-A*02:01 | 236           | 34             | 20332.01 | 34             | 20332.01    | 34          | TRUE         | TRUE              |
| 1     | TNFSISIT   | 698   | 706  | 9              | HLA-A*02:01 | 698           | 35             | 20403.19 | 35             | 20403.19    | 35          | TRUE         | TRUE              |
| 1     | KISNCVADY  | 344   | 352  | 9              | HLA-A*02:01 | 344           | 35             | 20411.79 | 35             | 20411.79    | 35          | TRUE         | TRUE              |
| 1     | ITTDNTFVS  | 1097  | 1105 | 9              | HLA-A*02:01 | 1097          | 35             | 20447.83 | 35             | 20447.83    | 35          | TRUE         | TRUE              |
| 1     | RNFTTAPAI  | 1055  | 1063 | 9              | HLA-A*02:01 | 1055          | 35             | 20541.18 | 35             | 20541.18    | 35          | TRUE         | TRUE              |
| 1     | IHADQLTPA  | 610   | 618  | 9              | HLA-A*02:01 | 610           | 35             | 20551.63 | 35             | 20551.63    | 35          | TRUE         | TRUE              |
| 1     | CANLLQYQ   | 731   | 739  | 9              | HLA-A*02:01 | 731           | 35             | 20566.76 | 35             | 20566.76    | 35          | TRUE         | TRUE              |
| 1     | NITNLCPFG  | 318   | 326  | 9              | HLA-A*02:01 | 318           | 35             | 20657.74 | 35             | 20657.74    | 35          | TRUE         | TRUE              |
| 1     | NVVRACNF   | 122   | 130  | 9              | HLA-A*02:01 | 122           | 35             | 20683.01 | 35             | 20683.01    | 35          | TRUE         | TRUE              |
| 1     | YNSTFFSTF  | 356   | 364  | 9              | HLA-A*02:01 | 356           | 35             | 20820.89 | 35             | 20820.89    | 35          | TRUE         | TRUE              |
| 1     | YISDAFSLD  | 163   | 171  | 9              | HLA-A*02:01 | 163           | 35             | 20839.81 | 35             | 20839.81    | 35          | TRUE         | TRUE              |
| 1     | EIDKGIVQT  | 294   | 302  | 9              | HLA-A*02:01 | 294           | 35             | 20874.11 | 35             | 20874.11    | 35          | TRUE         | TRUE              |
| 1     | SFIEDLLFN  | 798   | 806  | 9              | HLA-A*02:01 | 798           | 36             | 20919.11 | 36             | 20919.11    | 36          | TRUE         | TRUE              |
| 1     | ITTEVMPVSM | 705   | 713  | 9              | HLA-A*02:01 | 705           | 36             | 20919.11 | 36             | 20919.11    | 36          | TRUE         | TRUE              |
| 1     | AYSNNITAI  | 688   | 696  | 9              | HLA-A*02:01 | 688           | 36             | 20948.33 | 36             | 20948.33    | 36          | TRUE         | TRUE              |
| 1     | SAAAYFVGY  | 248   | 256  | 9              | HLA-A*02:01 | 248           | 36             | 20956.49 | 36             | 20956.49    | 36          | TRUE         | TRUE              |
| 1     | FGGVSIVTP  | 578   | 586  | 9              | HLA-A*02:01 | 578           | 36             | 21023.71 | 36             | 21023.71    | 36          | TRUE         | TRUE              |
| 1     | IVAYTMSLG  | 674   | 682  | 9              | HLA-A*02:01 | 674           | 36             | 21038.28 | 36             | 21038.28    | 36          | TRUE         | TRUE              |
| 1     | PHGVVFLHV  | 1039  | 1047 | 9              | HLA-A*02:01 | 1039          | 36             | 21063.09 | 36             | 21063.09    | 36          | TRUE         | TRUE              |
| 1     | KYFGGFNFS  | 777   | 785  | 9              | HLA-A*02:01 | 777           | 36             | 21087.51 | 36             | 21087.51    | 36          | TRUE         | TRUE              |
| 1     | TMSLGADSS  | 678   | 686  | 9              | HLA-A*02:01 | 678           | 36             | 21103.48 | 36             | 21103.48    | 36          | TRUE         | TRUE              |
| 1     | FVFKNKDGF  | 185   | 193  | 9              | HLA-A*02:01 | 185           | 36             | 21125.18 | 36             | 21125.18    | 36          | TRUE         | TRUE              |
| 1     | SNVTGFHTI  | 64    | 72   | 9              | HLA-A*02:01 | 64            | 36             | 21127.24 | 36             | 21127.24    | 36          | TRUE         | TRUE              |
| 1     | QMYKTPTLK  | 769   | 777  | 9              | HLA-A*02:01 | 769           | 36             | 21182.63 | 36             | 21182.63    | 36          | TRUE         | TRUE              |
| 1     | IINNVTYDP  | 1114  | 1122 | 9              | HLA-A*02:01 | 1114          | 36             | 21192.48 | 36             | 21192.48    | 36          | TRUE         | TRUE              |
| 1     | FSPDGKPCP  | 460   | 468  | 9              | HLA-A*02:01 | 460           | 36             | 21197.76 | 36             | 21197.76    | 36          | TRUE         | TRUE              |
| 1     | FDNANFCTF  | 153   | 161  | 9              | HLA-A*02:01 | 153           | 36             | 21212.68 | 36             | 21212.68    | 36          | TRUE         | TRUE              |
| 1     | AAYTAALVS  | 853   | 861  | 9              | HLA-A*02:01 | 853           | 36             | 21229.66 | 36             | 21229.66    | 36          | TRUE         | TRUE              |
| 1     | FNGTSWFIT  | 1079  | 1087 | 9              | HLA-A*02:01 | 1079          | 36             | 21236.78 | 36             | 21236.78    | 36          | TRUE         | TRUE              |
| 1     | LYNSTFFST  | 355   | 363  | 9              | HLA-A*02:01 | 355           | 36             | 21282.56 | 36             | 21282.56    | 36          | TRUE         | TRUE              |
| 1     | IINNVTYDPL | 1115  | 1123 | 9              | HLA-A*02:01 | 1115          | 36             | 21442.75 | 36             | 21442.75    | 36          | TRUE         | TRUE              |
| 1     | INTIAIPNF  | 692   | 700  | 9              | HLA-A*02:01 | 692           | 36             | 21445.29 | 36             | 21445.29    | 36          | TRUE         | TRUE              |
| 1     | LKYFGGFNF  | 776   | 784  | 9              | HLA-A*02:01 | 776           | 36             | 21449.47 | 36             | 21449.47    | 36          | TRUE         | TRUE              |
| 1     | ADYSVLVNS  | 350   | 358  | 9              | HLA-A*02:01 | 350           | 37             | 21505.25 | 37             | 21505.25    | 37          | TRUE         | TRUE              |
| 1     | FLTLTSGSD  | 7     | 15   | 9              | HLA-A*02:01 | 7             | 37             | 21544.6  | 37             | 21544.6     | 37          | TRUE         | TRUE              |
| 1     | MTSCSCCLK  | 1219  | 1227 | 9              | HLA-A*02:01 | 1219          | 37             | 21595.01 | 37             | 21595.01    | 37          | TRUE         | TRUE              |
| 1     | FQPFQQFGR  | 545   | 553  | 9              | HLA-A*02:01 | 545           | 37             | 21801.37 | 37             | 21801.37    | 37          | TRUE         | TRUE              |
| 1     | VFLHVTYVP  | 1043  | 1051 | 9              | HLA-A*02:01 | 1043          | 37             | 21929.13 | 37             | 21929.13    | 37          | TRUE         | TRUE              |
| 1     | IPFKDGIYF  | 81    | 89   | 9              | HLA-A*02:01 | 81            | 37             | 22014.23 | 37             | 22014.23    | 37          | TRUE         | TRUE              |
| 1     | QYGSFCTQL  | 737   | 745  | 9              | HLA-A*02:01 | 737           | 38             | 22157.85 | 38             | 22157.85    | 38          | TRUE         | TRUE              |
| 1     | CDIPIGAGI  | 648   | 656  | 9              | HLA-A*02:01 | 648           | 38             | 22171.28 | 38             | 22171.28    | 38          | TRUE         | TRUE              |
| 1     | ATKMSCEVL  | 1008  | 1016 | 9              | HLA-A*02:01 | 1008          | 38             | 22175.6  | 38             | 22175.6     | 38          | TRUE         | TRUE              |
| 1     | NFGAISVL   | 951   | 959  | 9              | HLA-A*02:01 | 951           | 38             | 22196.23 | 38             | 22196.23    | 38          | TRUE         | TRUE              |
| 1     | HTVSLLRST  | 661   | 669  | 9              | HLA-A*02:01 | 661           | 38             | 22285.99 | 38             | 22285.99    | 38          | TRUE         | TRUE              |
| 1     | AGAAQLPIF  | 872   | 880  | 9              | HLA-A*02:01 | 872           | 38             | 22418.29 | 38             | 22418.29    | 38          | TRUE         | TRUE              |
| 1     | QDLFLPFYS  | 56    | 64   | 9              | HLA-A*02:01 | 56            | 38             | 22507.74 | 38             | 22507.74    | 38          | TRUE         | TRUE              |
| 1     | KCYGVSATK  | 365   | 373  | 9              | HLA-A*02:01 | 365           | 38             | 22514.3  | 38             | 22514.3     | 38          | TRUE         | TRUE              |
| 1     | VAKNLNESL  | 1171  | 1179 | 9              | HLA-A*02:01 | 1171          | 38             | 22543.31 | 38             | 22543.31    | 38          | TRUE         | TRUE              |
| 1     | QSVIINNNS  | 112   | 120  | 9              | HLA-A*02:01 | 112           | 38             | 22566.25 | 38             | 22566.25    | 38          | TRUE         | TRUE              |
| 1     | SFGGVSVIT  | 577   | 585  | 9              | HLA-A*02:01 | 577           | 38             | 22588.96 | 38             | 22588.96    | 38          | TRUE         | TRUE              |
| 1     | NFRALITAF  | 230   | 238  | 9              |             |               |                |          |                |             |             |              |                   |

| seq # | peptide    | start | end  | peptide length | allele      | peptide index | median binding | ann IC50 | ann percentile | legacy IC50 | legacy rank | scores equal | percentiles equal |
|-------|------------|-------|------|----------------|-------------|---------------|----------------|----------|----------------|-------------|-------------|--------------|-------------------|
| 1     | WVFGSTMMN  | 101   | 109  | 9              | HLA-A*02:01 | 101           | 39             | 22782.39 | 39             | 22782.39    | 39          | TRUE         | TRUE              |
| 1     | PMGQTHTM   | 143   | 151  | 9              | HLA-A*02:01 | 143           | 39             | 22784.86 | 39             | 22784.86    | 39          | TRUE         | TRUE              |
| 1     | FELLNAPAT  | 501   | 509  | 9              | HLA-A*02:01 | 501           | 39             | 22796.44 | 39             | 22796.44    | 39          | TRUE         | TRUE              |
| 1     | OPRYVVVLS  | 492   | 500  | 9              | HLA-A*02:01 | 492           | 39             | 22831.25 | 39             | 22831.25    | 39          | TRUE         | TRUE              |
| 1     | GTSWFITQR  | 1081  | 1089 | 9              | HLA-A*02:01 | 1081          | 39             | 22934.24 | 39             | 22934.24    | 39          | TRUE         | TRUE              |
| 1     | IGQYPYRVV  | 489   | 497  | 9              | HLA-A*02:01 | 489           | 39             | 22954.84 | 39             | 22954.84    | 39          | TRUE         | TRUE              |
| 1     | TLKPIKFLP  | 215   | 223  | 9              | HLA-A*02:01 | 215           | 39             | 23087.61 | 39             | 23087.61    | 39          | TRUE         | TRUE              |
| 1     | TNLCPPGEV  | 320   | 328  | 9              | HLA-A*02:01 | 320           | 39             | 23102.36 | 39             | 23102.36    | 39          | TRUE         | TRUE              |
| 1     | KVTLADAGF  | 807   | 815  | 9              | HLA-A*02:01 | 807           | 39             | 23159.67 | 39             | 23159.67    | 39          | TRUE         | TRUE              |
| 1     | FNFSQILPD  | 782   | 790  | 9              | HLA-A*02:01 | 782           | 40             | 23189.76 | 40             | 23189.76    | 40          | TRUE         | TRUE              |
| 1     | VDLGDISGI  | 1146  | 1154 | 9              | HLA-A*02:01 | 1146          | 40             | 23234.21 | 40             | 23234.21    | 40          | TRUE         | TRUE              |
| 1     | CTTFDDVQA  | 19    | 27   | 9              | HLA-A*02:01 | 19            | 40             | 23283.28 | 40             | 23283.28    | 40          | TRUE         | TRUE              |
| 1     | VTQNVLYEN  | 893   | 901  | 9              | HLA-A*02:01 | 893           | 40             | 23365.3  | 40             | 23365.3     | 40          | TRUE         | TRUE              |
| 1     | RNFFSPQIL  | 1089  | 1097 | 9              | HLA-A*02:01 | 1089          | 40             | 23369.09 | 40             | 23369.09    | 40          | TRUE         | TRUE              |
| 1     | EQYIKWPWY  | 1189  | 1197 | 9              | HLA-A*02:01 | 1189          | 40             | 23404.77 | 40             | 23404.77    | 40          | TRUE         | TRUE              |
| 1     | GTNASSEVA  | 587   | 595  | 9              | HLA-A*02:01 | 587           | 40             | 23454.2  | 40             | 23454.2     | 40          | TRUE         | TRUE              |
| 1     | AYRFNGIGV  | 885   | 893  | 9              | HLA-A*02:01 | 885           | 40             | 23472.23 | 40             | 23472.23    | 40          | TRUE         | TRUE              |
| 1     | FGNPVPIFK  | 76    | 84   | 9              | HLA-A*02:01 | 76            | 40             | 23501.19 | 40             | 23501.19    | 40          | TRUE         | TRUE              |
| 1     | YLRHGKLRP  | 442   | 450  | 9              | HLA-A*02:01 | 442           | 40             | 23509.85 | 40             | 23509.85    | 40          | TRUE         | TRUE              |
| 1     | FNKVTLADA  | 805   | 813  | 9              | HLA-A*02:01 | 805           | 40             | 23598.53 | 40             | 23598.53    | 40          | TRUE         | TRUE              |
| 1     | VLTPSSKRF  | 537   | 545  | 9              | HLA-A*02:01 | 537           | 40             | 23675.51 | 40             | 23675.51    | 40          | TRUE         | TRUE              |
| 1     | YSNNTIAIP  | 689   | 697  | 9              | HLA-A*02:01 | 689           | 41             | 23733.48 | 41             | 23733.48    | 41          | TRUE         | TRUE              |
| 1     | QLTPAWRIY  | 614   | 622  | 9              | HLA-A*02:01 | 614           | 41             | 23738.87 | 41             | 23738.87    | 41          | TRUE         | TRUE              |
| 1     | TFVSGNCDV  | 1102  | 1110 | 9              | HLA-A*02:01 | 1102          | 41             | 23803.95 | 41             | 23803.95    | 41          | TRUE         | TRUE              |
| 1     | VLPLLTDD   | 842   | 850  | 9              | HLA-A*02:01 | 842           | 41             | 23812.18 | 41             | 23812.18    | 41          | TRUE         | TRUE              |
| 1     | SSIASYNNT  | 685   | 693  | 9              | HLA-A*02:01 | 685           | 41             | 23840.54 | 41             | 23840.54    | 41          | TRUE         | TRUE              |
| 1     | EQDRNTREV  | 755   | 763  | 9              | HLA-A*02:01 | 755           | 41             | 23909.52 | 41             | 23909.52    | 41          | TRUE         | TRUE              |
| 1     | SNVVRGVWF  | 95    | 103  | 9              | HLA-A*02:01 | 95            | 41             | 23953.54 | 41             | 23953.54    | 41          | TRUE         | TRUE              |
| 1     | ICGDSTECA  | 724   | 732  | 9              | HLA-A*02:01 | 724           | 41             | 23965.71 | 41             | 23965.71    | 41          | TRUE         | TRUE              |
| 1     | SNVYADSVF  | 380   | 388  | 9              | HLA-A*02:01 | 380           | 41             | 24017.38 | 41             | 24017.38    | 41          | TRUE         | TRUE              |
| 1     | AVLYQDVNC  | 595   | 603  | 9              | HLA-A*02:01 | 595           | 41             | 24028.54 | 41             | 24028.54    | 41          | TRUE         | TRUE              |
| 1     | FFSTFKCYG  | 360   | 368  | 9              | HLA-A*02:01 | 360           | 41             | 24035.57 | 41             | 24035.57    | 41          | TRUE         | TRUE              |
| 1     | PYRVVVLFS  | 493   | 501  | 9              | HLA-A*02:01 | 493           | 41             | 24115.02 | 41             | 24115.02    | 41          | TRUE         | TRUE              |
| 1     | APHGVVFLH  | 1038  | 1046 | 9              | HLA-A*02:01 | 1038          | 42             | 24249.51 | 42             | 24249.51    | 42          | TRUE         | TRUE              |
| 1     | ISNCVADYS  | 345   | 353  | 9              | HLA-A*02:01 | 345           | 42             | 24266.04 | 42             | 24266.04    | 42          | TRUE         | TRUE              |
| 1     | YEQYIKWPW  | 1188  | 1196 | 9              | HLA-A*02:01 | 1188          | 42             | 24270.51 | 42             | 24270.51    | 42          | TRUE         | TRUE              |
| 1     | EILDSPSC   | 569   | 577  | 9              | HLA-A*02:01 | 569           | 42             | 24271.04 | 42             | 24271.04    | 42          | TRUE         | TRUE              |
| 1     | GQSKRVDFC  | 1017  | 1025 | 9              | HLA-A*02:01 | 1017          | 42             | 24274.18 | 42             | 24274.18    | 42          | TRUE         | TRUE              |
| 1     | SEILDSPSC  | 568   | 576  | 9              | HLA-A*02:01 | 568           | 42             | 24300.47 | 42             | 24300.47    | 42          | TRUE         | TRUE              |
| 1     | YWPLNDYGF  | 475   | 483  | 9              | HLA-A*02:01 | 475           | 42             | 24304.4  | 42             | 24304.4     | 42          | TRUE         | TRUE              |
| 1     | GYQPYRVVV  | 490   | 498  | 9              | HLA-A*02:01 | 490           | 42             | 24362.86 | 42             | 24362.86    | 42          | TRUE         | TRUE              |
| 1     | INITNFRAI  | 226   | 234  | 9              | HLA-A*02:01 | 226           | 42             | 24450.26 | 42             | 24450.26    | 42          | TRUE         | TRUE              |
| 1     | KRSFIEDLL  | 796   | 804  | 9              | HLA-A*02:01 | 796           | 42             | 24463.23 | 42             | 24463.23    | 42          | TRUE         | TRUE              |
| 1     | EYISDAFSL  | 162   | 170  | 9              | HLA-A*02:01 | 162           | 42             | 24469.58 | 42             | 24469.58    | 42          | TRUE         | TRUE              |
| 1     | IPIGAGICA  | 650   | 658  | 9              | HLA-A*02:01 | 650           | 42             | 24485.46 | 42             | 24485.46    | 42          | TRUE         | TRUE              |
| 1     | GIYFAATEK  | 86    | 94   | 9              | HLA-A*02:01 | 86            | 42             | 24518.35 | 42             | 24518.35    | 42          | TRUE         | TRUE              |
| 1     | ITNLCPGGE  | 319   | 327  | 9              | HLA-A*02:01 | 319           | 42             | 24643.61 | 42             | 24643.61    | 42          | TRUE         | TRUE              |
| 1     | NKQSQVIII  | 109   | 117  | 9              | HLA-A*02:01 | 109           | 42             | 24658.54 | 42             | 24658.54    | 42          | TRUE         | TRUE              |
| 1     | IPFAMQMAY  | 878   | 886  | 9              | HLA-A*02:01 | 878           | 42             | 24674.56 | 42             | 24674.56    | 42          | TRUE         | TRUE              |
| 1     | DSTECANLL  | 727   | 735  | 9              | HLA-A*02:01 | 727           | 43             | 24740.59 | 43             | 24740.59    | 43          | TRUE         | TRUE              |
| 1     | YYPDEIFRS  | 41    | 49   | 9              | HLA-A*02:01 | 41            | 43             | 24746.75 | 43             | 24746.75    | 43          | TRUE         | TRUE              |
| 1     | KDGIYFAAT  | 84    | 92   | 9              | HLA-A*02:01 | 84            | 43             | 24766.84 | 43             | 24766.84    | 43          | TRUE         | TRUE              |
| 1     | QIITDNTF   | 1095  | 1103 | 9              | HLA-A*02:01 | 1095          | 43             | 24771.39 | 43             | 24771.39    | 43          | TRUE         | TRUE              |
| 1     | IGAGICASY  | 652   | 660  | 9              | HLA-A*02:01 | 652           | 43             | 24799.83 | 43             | 24799.83    | 43          | TRUE         | TRUE              |
| 1     | KQYGECLGD  | 817   | 825  | 9              | HLA-A*02:01 | 817           | 43             | 24814.85 | 43             | 24814.85    | 43          | TRUE         | TRUE              |
| 1     | IQESLTTTS  | 916   | 924  | 9              | HLA-A*02:01 | 916           | 43             | 24817.54 | 43             | 24817.54    | 43          | TRUE         | TRUE              |
| 1     | LIKNQCVNF  | 519   | 527  | 9              | HLA-A*02:01 | 519           | 43             | 24920.33 | 43             | 24920.33    | 43          | TRUE         | TRUE              |
| 1     | INARDLICA  | 826   | 834  | 9              | HLA-A*02:01 | 826           | 43             | 24958.64 | 43             | 24958.64    | 43          | TRUE         | TRUE              |
| 1     | EVFAQVKQM  | 762   | 770  | 9              | HLA-A*02:01 | 762           | 43             | 24977.28 | 43             | 24977.28    | 43          | TRUE         | TRUE              |
| 1     | TFGNVPVIF  | 75    | 83   | 9              | HLA-A*02:01 | 75            | 43             | 24984.58 | 43             | 24984.58    | 43          | TRUE         | TRUE              |
| 1     | GVYYPDEIF  | 39    | 47   | 9              | HLA-A*02:01 | 39            | 43             | 25003.78 | 43             | 25003.78    | 43          | TRUE         | TRUE              |
| 1     | LTGTGVLTP  | 532   | 540  | 9              | HLA-A*02:01 | 532           | 43             | 25018.39 | 43             | 25018.39    | 43          | TRUE         | TRUE              |
| 1     | PLQPELDSF  | 1122  | 1130 | 9              | HLA-A*02:01 | 1122          | 43             | 25026.51 | 43             | 25026.51    | 43          | TRUE         | TRUE              |
| 1     | LNDYGYTTT  | 478   | 486  | 9              | HLA-A*02:01 | 478           | 43             | 25027.33 | 43             | 25027.33    | 43          | TRUE         | TRUE              |
| 1     | TNASSEVAV  | 588   | 596  | 9              | HLA-A*02:01 | 588           | 43             | 25035.73 | 43             | 25035.73    | 43          | TRUE         | TRUE              |
| 1     | ITAIPTNFS  | 693   | 701  | 9              | HLA-A*02:01 | 693           | 43             | 25042.49 | 43             | 25042.49    | 43          | TRUE         | TRUE              |
| 1     | ICHEGKAYF  | 1063  | 1071 | 9              | HLA-A*02:01 | 1063          | 43             | 25121.74 | 43             | 25121.74    | 43          | TRUE         | TRUE              |
| 1     | SANLAATKM  | 1003  | 1011 | 9              | HLA-A*02:01 | 1003          | 44             | 25191.42 | 44             | 25191.42    | 44          | TRUE         | TRUE              |
| 1     | NQNAQALNT  | 935   | 943  | 9              | HLA-A*02:01 | 935           | 44             | 25212.69 | 44             | 25212.69    | 44          | TRUE         | TRUE              |
| 1     | KNQCVNFNF  | 521   | 529  | 9              | HLA-A*02:01 | 521           | 44             | 25221.43 | 44             | 25221.43    | 44          | TRUE         | TRUE              |
| 1     | STFKCYGVS  | 362   | 370  | 9              | HLA-A*02:01 | 362           | 44             | 25229.61 | 44             | 25229.61    | 44          | TRUE         | TRUE              |
| 1     | QURAAEIR   | 993   | 1001 | 9              | HLA-A*02:01 | 993           | 44             | 25251.46 | 44             | 25251.46    | 44          | TRUE         | TRUE              |
| 1     | KSQSIVIIIN | 110   | 118  | 9              | HLA-A*02:01 | 110           | 44             | 25261.57 | 44             | 25261.57    | 44          | TRUE         | TRUE              |
| 1     | YRFNGIGVT  | 886   | 894  | 9              | HLA-A*02:01 | 886           | 44             | 25356.32 | 44             | 25356.32    | 44          | TRUE         | TRUE              |
| 1     | SWFITQRNF  | 1083  | 1091 | 9              | HLA-A*02:01 | 1083          | 44             | 25376.08 | 44             | 25376.08    | 44          | TRUE         | TRUE              |
| 1     | FNCTFEYIS  | 157   | 165  | 9              | HLA-A*02:01 | 157           | 44             | 25384.04 | 44             | 25384.04    | 44          | TRUE         | TRUE              |
| 1     | FKCYGVSAT  | 364   | 372  | 9              | HLA-A*02:01 | 364           | 44             | 25388.98 | 44             | 25388.98    | 44          | TRUE         | TRUE              |
| 1     | FPSVYAWER  | 334   | 342  | 9              | HLA-A*02:01 | 334           | 44             | 25390.08 | 44             | 25390.08    | 44          | TRUE         | TRUE              |
| 1     | GTQTHTMIF  | 145   | 153  | 9              | HLA-A*02:01 | 145           | 44             | 25429.95 | 44             | 25429.95    | 44          | TRUE         | TRUE              |
| 1     | SFCTQLNRA  | 740   | 748  | 9              | HLA-A*02:01 | 740           | 44             | 25434.9  | 44             | 25434.9     | 44          | TRUE         | TRUE              |
| 1     | VITPGTNAS  | 583   | 591  | 9              | HLA-A*02:01 | 583           | 44             | 25457.2  | 44             | 25457.2     | 44          | TRUE         | TRUE              |
| 1     | NQFNKAISQ  | 907   | 915  | 9              | HLA-A*02:01 | 907           | 44             | 25462.72 | 44             | 25462.72    | 44          | TRUE         | TRUE              |
| 1     | MSECVLQGS  | 1011  | 1019 | 9              | HLA-A*02:01 | 1011          | 44             | 25473.74 | 44             | 25473.74    | 44          | TRUE         | TRUE              |
| 1     | SSEVAVLQY  | 591   | 599  | 9              | HLA-A*02:01 | 591           | 44             | 25490.27 | 44             | 25490.27    | 44          | TRUE         | TRUE              |
| 1     | AQALNTLVK  | 938   | 946  | 9              | HLA-A*02:01 | 938           | 44             | 25491.37 | 44             | 25491.37    | 44          | TRUE         | TRUE              |
| 1     | PFFAVSKPM  | 136   | 144  | 9              | HLA-A*02:01 | 136           | 44             | 25491.37 | 44             | 25491.37    | 44          | TRUE         | TRUE              |
| 1     | REGVVFVNG  | 1073  | 1081 | 9              | HLA-A*02:01 | 1073          | 44             | 25500.48 | 44             | 25500.48    | 44          | TRUE         | TRUE              |
| 1     | SSVLNDILS  | 956   | 964  | 9              | HLA-A*02:01 | 956           | 44             | 25608.59 | 44             | 25608.59    | 44          | TRUE         | TRUE              |
| 1     | AMQMAYRFN  | 881   | 889  | 9              | HLA-A*02:01 | 881           | 45             | 25625.23 | 45             | 25625.23    | 45          | TRUE         | TRUE              |
| 1     | VGYLKPTTF  | 254   | 262  | 9              | HLA-A*02:01 | 254           | 45             | 25654.35 | 45             | 25654.35    | 45          | TRUE         | TRUE              |
| 1     | LIGAHEVDT  | 636   | 644  | 9              | HLA-A*02:01 | 636           | 45             | 25695.74 | 45             | 25695.74    | 45          | TRUE         | TRUE              |
| 1     | VADYSVLVN  | 349   | 357  | 9              | HLA-A*02:01 | 349           | 45             | 25729.12 | 45             | 25729.12    | 45          | TRUE         | TRUE              |
| 1     | ITQRNFFSP  | 1086  | 1094 | 9              | HLA-A*02:01 | 1086          | 45             | 25732.19 | 45             | 25732.19    | 45          | TRUE         | TRUE              |
| 1     | NKDGFLVYV  | 189   | 197  | 9              | HLA-A*02:01 | 189           | 45             | 25813.9  | 45             | 25813.9     | 45          | TRUE         | TRUE              |
| 1     | FGRDVSDF   | 551   | 559  | 9              | HLA-A*02:01 | 551           | 45             | 25822.56 | 45             | 25822.56    | 45          | TRUE         | TRUE              |
| 1     | CLKGACSCG  | 1225  | 1233 | 9              | HLA-A*02:01 | 1225          | 45             | 25829.26 | 45             | 25829.26    | 45          | TRUE         | TRUE              |
| 1     | DTLYLTQDL  | 50    | 58   | 9              | HLA-A*02:01 | 50            | 45             | 25831.77 | 45             | 25831.77    | 45          | TRUE         | TRUE              |
| 1     | TTFDVQAP   | 20    | 28   | 9              | HLA-A*02:01 | 20            | 45             | 25888.57 | 45             | 25888.57    | 45          | TRUE         | TRUE              |
| 1     | TDDMIAAYT  | 848   | 856  | 9              | HLA-A*02:01 | 848           | 45             | 25956.16 | 45             | 25956.16    | 45          | TRUE         | TRUE              |
| 1     |            |       |      |                |             |               |                |          |                |             |             |              |                   |

| seq # | peptide    | start | end  | peptide length | allele      | peptide index | median binding | ann IC50 | ann percentile | legacy IC50 | legacy rank | scores equal | percentiles equal |
|-------|------------|-------|------|----------------|-------------|---------------|----------------|----------|----------------|-------------|-------------|--------------|-------------------|
| 1     | LCFSNVVAD  | 377   | 385  | 9              | HLA-A*02:01 | 377           | 46             | 26128.61 | 46             | 26128.61    | 46          | TRUE         | TRUE              |
| 1     | NFELCDNPF  | 129   | 137  | 9              | HLA-A*02:01 | 129           | 46             | 26153.79 | 46             | 26153.79    | 46          | TRUE         | TRUE              |
| 1     | NVVRGWVFG  | 96    | 104  | 9              | HLA-A*02:01 | 96            | 46             | 26163.97 | 46             | 26163.97    | 46          | TRUE         | TRUE              |
| 1     | KAISQIQES  | 911   | 919  | 9              | HLA-A*02:01 | 911           | 46             | 26201.66 | 46             | 26201.66    | 46          | TRUE         | TRUE              |
| 1     | EVMPVSMMAK | 707   | 715  | 9              | HLA-A*02:01 | 707           | 46             | 26207.61 | 46             | 26207.61    | 46          | TRUE         | TRUE              |
| 1     | TQLNRALSG  | 743   | 751  | 9              | HLA-A*02:01 | 743           | 46             | 26252.46 | 46             | 26252.46    | 46          | TRUE         | TRUE              |
| 1     | IDRLITGRL  | 975   | 983  | 9              | HLA-A*02:01 | 975           | 46             | 26304.77 | 46             | 26304.77    | 46          | TRUE         | TRUE              |
| 1     | LCMTSCCS   | 1216  | 1224 | 9              | HLA-A*02:01 | 1216          | 46             | 26320.99 | 46             | 26320.99    | 46          | TRUE         | TRUE              |
| 1     | SPAQDIWGT  | 239   | 247  | 9              | HLA-A*02:01 | 239           | 46             | 26342.09 | 46             | 26342.09    | 46          | TRUE         | TRUE              |
| 1     | DSEPLKGV   | 1242  | 1250 | 9              | HLA-A*02:01 | 1242          | 46             | 26372.02 | 46             | 26372.02    | 46          | TRUE         | TRUE              |
| 1     | QYGECLGDI  | 818   | 826  | 9              | HLA-A*02:01 | 818           | 46             | 26378.87 | 46             | 26378.87    | 46          | TRUE         | TRUE              |
| 1     | FGEVFNATK  | 325   | 333  | 9              | HLA-A*02:01 | 325           | 46             | 26393.42 | 46             | 26393.42    | 46          | TRUE         | TRUE              |
| 1     | GYHLMSFPQ  | 1028  | 1036 | 9              | HLA-A*02:01 | 1028          | 46             | 26455.47 | 46             | 26455.47    | 46          | TRUE         | TRUE              |
| 1     | AEVDRIUR   | 971   | 979  | 9              | HLA-A*02:01 | 971           | 46             | 26456.61 | 46             | 26456.61    | 46          | TRUE         | TRUE              |
| 1     | IRACNFELC  | 125   | 133  | 9              | HLA-A*02:01 | 125           | 46             | 26460.33 | 46             | 26460.33    | 46          | TRUE         | TRUE              |
| 1     | LGDISGINA  | 1148  | 1156 | 9              | HLA-A*02:01 | 1148          | 46             | 26533.44 | 46             | 26533.44    | 46          | TRUE         | TRUE              |
| 1     | RDLICAQKF  | 829   | 837  | 9              | HLA-A*02:01 | 829           | 47             | 26602.73 | 47             | 26602.73    | 47          | TRUE         | TRUE              |
| 1     | LLRSTSQKS  | 665   | 673  | 9              | HLA-A*02:01 | 665           | 47             | 26617.12 | 47             | 26617.12    | 47          | TRUE         | TRUE              |
| 1     | ITDAVDCSQ  | 272   | 280  | 9              | HLA-A*02:01 | 272           | 47             | 26618.27 | 47             | 26618.27    | 47          | TRUE         | TRUE              |
| 1     | IFDNAFNCT  | 152   | 160  | 9              | HLA-A*02:01 | 152           | 47             | 26625.76 | 47             | 26625.76    | 47          | TRUE         | TRUE              |
| 1     | INNNTNVI   | 117   | 125  | 9              | HLA-A*02:01 | 117           | 47             | 26634.4  | 47             | 26634.4     | 47          | TRUE         | TRUE              |
| 1     | ELKCSVKSF  | 285   | 293  | 9              | HLA-A*02:01 | 285           | 47             | 26646.22 | 47             | 26646.22    | 47          | TRUE         | TRUE              |
| 1     | NCVADYSVL  | 347   | 355  | 9              | HLA-A*02:01 | 347           | 47             | 26658.34 | 47             | 26658.34    | 47          | TRUE         | TRUE              |
| 1     | YKPTFLKYF  | 771   | 779  | 9              | HLA-A*02:01 | 771           | 47             | 26702.51 | 47             | 26702.51    | 47          | TRUE         | TRUE              |
| 1     | TSNFRVVP   | 302   | 310  | 9              | HLA-A*02:01 | 302           | 47             | 26719.56 | 47             | 26719.56    | 47          | TRUE         | TRUE              |
| 1     | TVYDLPQE   | 1118  | 1126 | 9              | HLA-A*02:01 | 1118          | 47             | 26763.81 | 47             | 26763.81    | 47          | TRUE         | TRUE              |
| 1     | EIDRLNEVA  | 1164  | 1172 | 9              | HLA-A*02:01 | 1164          | 47             | 26770.47 | 47             | 26770.47    | 47          | TRUE         | TRUE              |
| 1     | GCVLAWNTR  | 418   | 426  | 9              | HLA-A*02:01 | 418           | 47             | 26795.69 | 47             | 26795.69    | 47          | TRUE         | TRUE              |
| 1     | SYHTVSLLR  | 659   | 667  | 9              | HLA-A*02:01 | 659           | 47             | 26881.06 | 47             | 26881.06    | 47          | TRUE         | TRUE              |
| 1     | QPIDVVRDL  | 201   | 209  | 9              | HLA-A*02:01 | 201           | 47             | 26923.86 | 47             | 26923.86    | 47          | TRUE         | TRUE              |
| 1     | YTTTGIGYQ  | 484   | 492  | 9              | HLA-A*02:01 | 484           | 47             | 26932.3  | 47             | 26932.3     | 47          | TRUE         | TRUE              |
| 1     | TVLPLLLTD  | 841   | 849  | 9              | HLA-A*02:01 | 841           | 47             | 26932.89 | 47             | 26932.89    | 47          | TRUE         | TRUE              |
| 1     | GLFYVYKGY  | 192   | 200  | 9              | HLA-A*02:01 | 192           | 47             | 26952.42 | 47             | 26952.42    | 47          | TRUE         | TRUE              |
| 1     | TKFPSVYAW  | 332   | 340  | 9              | HLA-A*02:01 | 332           | 47             | 26960.59 | 47             | 26960.59    | 47          | TRUE         | TRUE              |
| 1     | GYLKPTTFM  | 255   | 263  | 9              | HLA-A*02:01 | 255           | 48             | 26974    | 48             | 26974       | 48          | TRUE         | TRUE              |
| 1     | WGTSAAAYF  | 245   | 253  | 9              | HLA-A*02:01 | 245           | 48             | 26974.89 | 48             | 26974.89    | 48          | TRUE         | TRUE              |
| 1     | ATKLNDLCF  | 371   | 379  | 9              | HLA-A*02:01 | 371           | 48             | 26988.6  | 48             | 26988.6     | 48          | TRUE         | TRUE              |
| 1     | GDVVRFPNI  | 311   | 319  | 9              | HLA-A*02:01 | 311           | 48             | 26991.82 | 48             | 26991.82    | 48          | TRUE         | TRUE              |
| 1     | TTDNTFVSG  | 1098  | 1106 | 9              | HLA-A*02:01 | 1098          | 48             | 26994.74 | 48             | 26994.74    | 48          | TRUE         | TRUE              |
| 1     | FAQVKQMYK  | 764   | 772  | 9              | HLA-A*02:01 | 764           | 48             | 27026.59 | 48             | 27026.59    | 48          | TRUE         | TRUE              |
| 1     | SNNTIAIPT  | 690   | 698  | 9              | HLA-A*02:01 | 690           | 48             | 27088.95 | 48             | 27088.95    | 48          | TRUE         | TRUE              |
| 1     | KQIANQFNK  | 903   | 911  | 9              | HLA-A*02:01 | 903           | 48             | 27104.49 | 48             | 27104.49    | 48          | TRUE         | TRUE              |
| 1     | YHTVSLIRS  | 660   | 668  | 9              | HLA-A*02:01 | 660           | 48             | 27108    | 48             | 27108       | 48          | TRUE         | TRUE              |
| 1     | AGICASYHT  | 654   | 662  | 9              | HLA-A*02:01 | 654           | 48             | 27116.22 | 48             | 27116.22    | 48          | TRUE         | TRUE              |
| 1     | KTSVDCNMY  | 715   | 723  | 9              | HLA-A*02:01 | 715           | 48             | 27118.28 | 48             | 27118.28    | 48          | TRUE         | TRUE              |
| 1     | YQPIDVVRD  | 200   | 208  | 9              | HLA-A*02:01 | 200           | 48             | 27125.91 | 48             | 27125.91    | 48          | TRUE         | TRUE              |
| 1     | HTFGNVPV   | 74    | 82   | 9              | HLA-A*02:01 | 74            | 48             | 27167.31 | 48             | 27167.31    | 48          | TRUE         | TRUE              |
| 1     | KSIVAYTMS  | 672   | 680  | 9              | HLA-A*02:01 | 672           | 48             | 27234.13 | 48             | 27234.13    | 48          | TRUE         | TRUE              |
| 1     | AIHADQLTP  | 609   | 617  | 9              | HLA-A*02:01 | 609           | 48             | 27240.91 | 48             | 27240.91    | 48          | TRUE         | TRUE              |
| 1     | GGVSIVTPG  | 579   | 587  | 9              | HLA-A*02:01 | 579           | 48             | 27304.35 | 48             | 27304.35    | 48          | TRUE         | TRUE              |
| 1     | IRASANLAA  | 1000  | 1008 | 9              | HLA-A*02:01 | 1000          | 48             | 27393.42 | 48             | 27393.42    | 48          | TRUE         | TRUE              |
| 1     | SONPLAELK  | 279   | 287  | 9              | HLA-A*02:01 | 279           | 48             | 27395.49 | 48             | 27395.49    | 48          | TRUE         | TRUE              |
| 1     | CDVVIGIIN  | 1108  | 1116 | 9              | HLA-A*02:01 | 1108          | 49             | 27453.06 | 49             | 27453.06    | 49          | TRUE         | TRUE              |
| 1     | ODMIAAYTA  | 849   | 857  | 9              | HLA-A*02:01 | 849           | 49             | 27516.69 | 49             | 27516.69    | 49          | TRUE         | TRUE              |
| 1     | KFNGLTVLP  | 836   | 844  | 9              | HLA-A*02:01 | 836           | 49             | 27519.37 | 49             | 27519.37    | 49          | TRUE         | TRUE              |
| 1     | TGFHTINH   | 67    | 75   | 9              | HLA-A*02:01 | 67            | 49             | 27520.56 | 49             | 27520.56    | 49          | TRUE         | TRUE              |
| 1     | RGVYYPDEI  | 38    | 46   | 9              | HLA-A*02:01 | 38            | 49             | 27529.51 | 49             | 27529.51    | 49          | TRUE         | TRUE              |
| 1     | NFFSPQIIT  | 1090  | 1098 | 9              | HLA-A*02:01 | 1090          | 49             | 27581.68 | 49             | 27581.68    | 49          | TRUE         | TRUE              |
| 1     | GIINNTVYD  | 1113  | 1121 | 9              | HLA-A*02:01 | 1113          | 49             | 27614.52 | 49             | 27614.52    | 49          | TRUE         | TRUE              |
| 1     | DGFLVYKGY  | 191   | 199  | 9              | HLA-A*02:01 | 191           | 49             | 27625.28 | 49             | 27625.28    | 49          | TRUE         | TRUE              |
| 1     | FTDSVRDPK  | 558   | 566  | 9              | HLA-A*02:01 | 558           | 49             | 27644.12 | 49             | 27644.12    | 49          | TRUE         | TRUE              |
| 1     | TEVMPPVMA  | 706   | 714  | 9              | HLA-A*02:01 | 706           | 49             | 27646.81 | 49             | 27646.81    | 49          | TRUE         | TRUE              |
| 1     | NFKHLREFV  | 178   | 186  | 9              | HLA-A*02:01 | 178           | 49             | 27665.96 | 49             | 27665.96    | 49          | TRUE         | TRUE              |
| 1     | MSFPQAAPH  | 1032  | 1040 | 9              | HLA-A*02:01 | 1032          | 49             | 27676.13 | 49             | 27676.13    | 49          | TRUE         | TRUE              |
| 1     | GFTHTINH   | 68    | 76   | 9              | HLA-A*02:01 | 68            | 49             | 27677.33 | 49             | 27677.33    | 49          | TRUE         | TRUE              |
| 1     | EGVVFVNGT  | 1074  | 1082 | 9              | HLA-A*02:01 | 1074          | 49             | 27694.7  | 49             | 27694.7     | 49          | TRUE         | TRUE              |
| 1     | AYFVGYLKP  | 251   | 259  | 9              | HLA-A*02:01 | 251           | 49             | 27730.7  | 49             | 27730.7     | 49          | TRUE         | TRUE              |
| 1     | NCVWPLNDY  | 473   | 481  | 9              | HLA-A*02:01 | 473           | 49             | 27759.81 | 49             | 27759.81    | 49          | TRUE         | TRUE              |
| 1     | ECANLLLQY  | 730   | 738  | 9              | HLA-A*02:01 | 730           | 49             | 27775.73 | 49             | 27775.73    | 49          | TRUE         | TRUE              |
| 1     | LIDLQELGK  | 1179  | 1187 | 9              | HLA-A*02:01 | 1179          | 49             | 27789.56 | 49             | 27789.56    | 49          | TRUE         | TRUE              |
| 1     | TFFSTFKCY  | 359   | 367  | 9              | HLA-A*02:01 | 359           | 49             | 27791.96 | 49             | 27791.96    | 49          | TRUE         | TRUE              |
| 1     | GKPCPTPAL  | 464   | 472  | 9              | HLA-A*02:01 | 464           | 50             | 27833.79 | 50             | 27833.79    | 50          | TRUE         | TRUE              |
| 1     | FYTTTGIGY  | 483   | 491  | 9              | HLA-A*02:01 | 483           | 50             | 27836.81 | 50             | 27836.81    | 50          | TRUE         | TRUE              |
| 1     | VVIRACNFE  | 123   | 131  | 9              | HLA-A*02:01 | 123           | 50             | 27893.79 | 50             | 27893.79    | 50          | TRUE         | TRUE              |
| 1     | SLLRSTSQK  | 664   | 672  | 9              | HLA-A*02:01 | 664           | 50             | 27932.15 | 50             | 27932.15    | 50          | TRUE         | TRUE              |
| 1     | ARDLICAQK  | 828   | 836  | 9              | HLA-A*02:01 | 828           | 50             | 27992.06 | 50             | 27992.06    | 50          | TRUE         | TRUE              |
| 1     | TSSMRGVVY  | 34    | 42   | 9              | HLA-A*02:01 | 34            | 50             | 28010.53 | 50             | 28010.53    | 50          | TRUE         | TRUE              |
| 1     | IAPGQTGVI  | 397   | 405  | 9              | HLA-A*02:01 | 397           | 50             | 28014.16 | 50             | 28014.16    | 50          | TRUE         | TRUE              |
| 1     | SFVVKGDDV  | 386   | 394  | 9              | HLA-A*02:01 | 386           | 50             | 28124.71 | 50             | 28124.71    | 50          | TRUE         | TRUE              |
| 1     | MGTQTHTMI  | 144   | 152  | 9              | HLA-A*02:01 | 144           | 50             | 28143.29 | 50             | 28143.29    | 50          | TRUE         | TRUE              |
| 1     | YRYLRHGLK  | 440   | 448  | 9              | HLA-A*02:01 | 440           | 50             | 28152.73 | 50             | 28152.73    | 50          | TRUE         | TRUE              |
| 1     | ITPGTNASS  | 584   | 592  | 9              | HLA-A*02:01 | 584           | 50             | 28153.33 | 50             | 28153.33    | 50          | TRUE         | TRUE              |
| 1     | AALVSGTAT  | 857   | 865  | 9              | HLA-A*02:01 | 857           | 51             | 28262.9  | 51             | 28262.9     | 51          | TRUE         | TRUE              |
| 1     | GVTQNVLYE  | 892   | 900  | 9              | HLA-A*02:01 | 892           | 51             | 28264.12 | 51             | 28264.12    | 51          | TRUE         | TRUE              |
| 1     | LKGVKLHYT  | 1247  | 1255 | 9              | HLA-A*02:01 | 1247          | 51             | 28305.75 | 51             | 28305.75    | 51          | TRUE         | TRUE              |
| 1     | CLIGAEHVD  | 635   | 643  | 9              | HLA-A*02:01 | 635           | 51             | 28318.62 | 51             | 28318.62    | 51          | TRUE         | TRUE              |
| 1     | TKRSFIEDL  | 795   | 803  | 9              | HLA-A*02:01 | 795           | 51             | 28320.15 | 51             | 28320.15    | 51          | TRUE         | TRUE              |
| 1     | TLVKQLSSN  | 943   | 951  | 9              | HLA-A*02:01 | 943           | 51             | 28337    | 51             | 28337       | 51          | TRUE         | TRUE              |
| 1     | LKYDENGTI  | 264   | 272  | 9              | HLA-A*02:01 | 264           | 51             | 28355.41 | 51             | 28355.41    | 51          | TRUE         | TRUE              |
| 1     | TECANLLQL  | 729   | 737  | 9              | HLA-A*02:01 | 729           | 51             | 28365.83 | 51             | 28365.83    | 51          | TRUE         | TRUE              |
| 1     | QFNKAISQI  | 908   | 916  | 9              | HLA-A*02:01 | 908           | 51             | 28375.05 | 51             | 28375.05    | 51          | TRUE         | TRUE              |
| 1     | FNTLKIPIK  | 213   | 221  | 9              | HLA-A*02:01 | 213           | 51             | 28399    | 51             | 28399       | 51          | TRUE         | TRUE              |
| 1     | STDLKNQOC  | 516   | 524  | 9              | HLA-A*02:01 | 516           | 51             | 28417.45 | 51             | 28417.45    | 51          | TRUE         | TRUE              |
| 1     | TPAWRIYST  | 616   | 624  | 9              | HLA-A*02:01 | 616           | 51             | 28460.22 | 51             | 28460.22    | 51          | TRUE         | TRUE              |
| 1     | QRNFFSPQI  | 1088  | 1096 | 9              | HLA-A*02:01 | 1088          | 51             | 28504.91 | 51             | 28504.91    | 51          | TRUE         | TRUE              |
| 1     | FRVVPSPGV  | 305   | 313  | 9              | HLA-A*02:01 | 305           | 51             | 28510.15 | 51             | 28510.15    | 51          | TRUE         | TRUE              |
| 1     | TVCGPKLST  | 509   | 517  | 9              | HLA-A*02:01 | 509           | 51             | 28543.17 | 51             | 28543.17    | 51          | TRUE         | TRUE              |
| 1     | EIRASANLA  | 999   | 1007 | 9              | HLA-A*02:01 | 999           | 51             | 28550.28 | 51             | 28550.28    | 51          | TRUE         | TRUE              |
| 1     | NDYGFYTTT  | 479   | 487  | 9              | HLA-A       |               |                |          |                |             |             |              |                   |

| seq # | peptide    | start | end  | peptide length | allele      | peptide index | median binding | ann IC50 | ann percentile | legacy IC50 | legacy rank | scores equal | percentiles equal |
|-------|------------|-------|------|----------------|-------------|---------------|----------------|----------|----------------|-------------|-------------|--------------|-------------------|
| 1     | DISNVFPSP  | 454   | 462  | 9              | HLA-A*02:01 | 454           | 52             | 28664.5  | 52             | 28664.5     | 52          | TRUE         | TRUE              |
| 1     | RFPNITNLC  | 315   | 323  | 9              | HLA-A*02:01 | 315           | 52             | 28681.25 | 52             | 28681.25    | 52          | TRUE         | TRUE              |
| 1     | GKGYHLMF   | 1026  | 1034 | 9              | HLA-A*02:01 | 1026          | 52             | 28695.83 | 52             | 28695.83    | 52          | TRUE         | TRUE              |
| 1     | NLAATKMSE  | 1005  | 1013 | 9              | HLA-A*02:01 | 1005          | 52             | 28723.47 | 52             | 28723.47    | 52          | TRUE         | TRUE              |
| 1     | KPTTFMLKY  | 258   | 266  | 9              | HLA-A*02:01 | 258           | 52             | 28725.66 | 52             | 28725.66    | 52          | TRUE         | TRUE              |
| 1     | NQCYNFNFN  | 522   | 530  | 9              | HLA-A*02:01 | 522           | 52             | 28739.02 | 52             | 28739.02    | 52          | TRUE         | TRUE              |
| 1     | CTPPALNCY  | 467   | 475  | 9              | HLA-A*02:01 | 467           | 52             | 28741.21 | 52             | 28741.21    | 52          | TRUE         | TRUE              |
| 1     | QILPDLPKP  | 786   | 794  | 9              | HLA-A*02:01 | 786           | 52             | 28770.45 | 52             | 28770.45    | 52          | TRUE         | TRUE              |
| 1     | RSDTLYLTQ  | 48    | 56   | 9              | HLA-A*02:01 | 48            | 52             | 28777.91 | 52             | 28777.91    | 52          | TRUE         | TRUE              |
| 1     | YKLPDFMFG  | 410   | 418  | 9              | HLA-A*02:01 | 410           | 52             | 28812.51 | 52             | 28812.51    | 52          | TRUE         | TRUE              |
| 1     | INDLCFSNVY | 375   | 383  | 9              | HLA-A*02:01 | 375           | 52             | 28828.1  | 52             | 28828.1     | 52          | TRUE         | TRUE              |
| 1     | VVRDLPSPG  | 205   | 213  | 9              | HLA-A*02:01 | 205           | 52             | 28871.49 | 52             | 28871.49    | 52          | TRUE         | TRUE              |
| 1     | RALSGIAAE  | 747   | 755  | 9              | HLA-A*02:01 | 747           | 52             | 28907.43 | 52             | 28907.43    | 52          | TRUE         | TRUE              |
| 1     | FPNITNLC   | 316   | 324  | 9              | HLA-A*02:01 | 316           | 53             | 28975.07 | 53             | 28975.07    | 53          | TRUE         | TRUE              |
| 1     | VRGWVFGST  | 98    | 106  | 9              | HLA-A*02:01 | 98            | 53             | 29024.65 | 53             | 29024.65    | 53          | TRUE         | TRUE              |
| 1     | TDVSTAIHA  | 604   | 612  | 9              | HLA-A*02:01 | 604           | 53             | 29031.24 | 53             | 29031.24    | 53          | TRUE         | TRUE              |
| 1     | GSFCQLNRR  | 739   | 747  | 9              | HLA-A*02:01 | 739           | 53             | 29050.72 | 53             | 29050.72    | 53          | TRUE         | TRUE              |
| 1     | AEIRASANL  | 998   | 1006 | 9              | HLA-A*02:01 | 998           | 53             | 29065.5  | 53             | 29065.5     | 53          | TRUE         | TRUE              |
| 1     | SOLDRCTTF  | 14    | 22   | 9              | HLA-A*02:01 | 14            | 53             | 29070.21 | 53             | 29070.21    | 53          | TRUE         | TRUE              |
| 1     | LICAQKFNG  | 831   | 839  | 9              | HLA-A*02:01 | 831           | 53             | 29108.29 | 53             | 29108.29    | 53          | TRUE         | TRUE              |
| 1     | FSPAQDIWG  | 238   | 246  | 9              | HLA-A*02:01 | 238           | 53             | 29147.7  | 53             | 29147.7     | 53          | TRUE         | TRUE              |
| 1     | QCVNFNFNG  | 523   | 531  | 9              | HLA-A*02:01 | 523           | 53             | 29163.46 | 53             | 29163.46    | 53          | TRUE         | TRUE              |
| 1     | CDNPFFAVS  | 133   | 141  | 9              | HLA-A*02:01 | 133           | 53             | 29209.89 | 53             | 29209.89    | 53          | TRUE         | TRUE              |
| 1     | KGYHLMSP   | 1027  | 1035 | 9              | HLA-A*02:01 | 1027          | 53             | 29221.27 | 53             | 29221.27    | 53          | TRUE         | TRUE              |
| 1     | FKEELDKYF  | 1130  | 1138 | 9              | HLA-A*02:01 | 1130          | 53             | 29251.31 | 53             | 29251.31    | 53          | TRUE         | TRUE              |
| 1     | THTMIFDNA  | 148   | 156  | 9              | HLA-A*02:01 | 148           | 53             | 29252.59 | 53             | 29252.59    | 53          | TRUE         | TRUE              |
| 1     | LSSNFGAIS  | 948   | 956  | 9              | HLA-A*02:01 | 948           | 53             | 29264.61 | 53             | 29264.61    | 53          | TRUE         | TRUE              |
| 1     | LQPELDSFK  | 1123  | 1131 | 9              | HLA-A*02:01 | 1123          | 53             | 29286.15 | 53             | 29286.15    | 53          | TRUE         | TRUE              |
| 1     | TLKYFGGFN  | 775   | 783  | 9              | HLA-A*02:01 | 775           | 53             | 29288.68 | 53             | 29288.68    | 53          | TRUE         | TRUE              |
| 1     | SEVALVYQD  | 592   | 600  | 9              | HLA-A*02:01 | 592           | 53             | 29296.92 | 53             | 29296.92    | 53          | TRUE         | TRUE              |
| 1     | TFKCVGVSA  | 363   | 371  | 9              | HLA-A*02:01 | 363           | 53             | 29307.39 | 53             | 29307.39    | 53          | TRUE         | TRUE              |
| 1     | TTGIGYOPY  | 486   | 494  | 9              | HLA-A*02:01 | 486           | 54             | 29348.32 | 54             | 29348.32    | 54          | TRUE         | TRUE              |
| 1     | GTGVLTPSS  | 534   | 542  | 9              | HLA-A*02:01 | 534           | 54             | 29349.91 | 54             | 29349.91    | 54          | TRUE         | TRUE              |
| 1     | TFEYISDAF  | 160   | 168  | 9              | HLA-A*02:01 | 160           | 54             | 29355.3  | 54             | 29355.3     | 54          | TRUE         | TRUE              |
| 1     | TQRNFSPQ   | 1087  | 1095 | 9              | HLA-A*02:01 | 1087          | 54             | 29378.83 | 54             | 29378.83    | 54          | TRUE         | TRUE              |
| 1     | KDGFLYVYK  | 190   | 198  | 9              | HLA-A*02:01 | 190           | 54             | 29404.59 | 54             | 29404.59    | 54          | TRUE         | TRUE              |
| 1     | AIPTNFNSI  | 695   | 703  | 9              | HLA-A*02:01 | 695           | 54             | 29416.37 | 54             | 29416.37    | 54          | TRUE         | TRUE              |
| 1     | NQKGIANQF  | 901   | 909  | 9              | HLA-A*02:01 | 901           | 54             | 29420.82 | 54             | 29420.82    | 54          | TRUE         | TRUE              |
| 1     | SSNFGAISI  | 949   | 957  | 9              | HLA-A*02:01 | 949           | 54             | 29431.96 | 54             | 29431.96    | 54          | TRUE         | TRUE              |
| 1     | FGAISSVLN  | 952   | 960  | 9              | HLA-A*02:01 | 952           | 54             | 29448.2  | 54             | 29448.2     | 54          | TRUE         | TRUE              |
| 1     | FEIDKGIYQ  | 293   | 301  | 9              | HLA-A*02:01 | 293           | 54             | 29461.27 | 54             | 29461.27    | 54          | TRUE         | TRUE              |
| 1     | PCSFGGVSV  | 575   | 583  | 9              | HLA-A*02:01 | 575           | 54             | 29463.18 | 54             | 29463.18    | 54          | TRUE         | TRUE              |
| 1     | QTOAGCIJG  | 630   | 638  | 9              | HLA-A*02:01 | 630           | 54             | 29464.46 | 54             | 29464.46    | 54          | TRUE         | TRUE              |
| 1     | TITDAVDCS  | 271   | 279  | 9              | HLA-A*02:01 | 271           | 54             | 29470.52 | 54             | 29470.52    | 54          | TRUE         | TRUE              |
| 1     | ISITTEVMP  | 702   | 710  | 9              | HLA-A*02:01 | 702           | 54             | 29481.03 | 54             | 29481.03    | 54          | TRUE         | TRUE              |
| 1     | VNMFNFNGLT | 525   | 533  | 9              | HLA-A*02:01 | 525           | 54             | 29496.36 | 54             | 29496.36    | 54          | TRUE         | TRUE              |
| 1     | PVIFPKDGI  | 79    | 87   | 9              | HLA-A*02:01 | 79            | 54             | 29497.31 | 54             | 29497.31    | 54          | TRUE         | TRUE              |
| 1     | SLDVSSEKSG | 169   | 177  | 9              | HLA-A*02:01 | 169           | 54             | 29514.23 | 54             | 29514.23    | 54          | TRUE         | TRUE              |
| 1     | FTTAPAICH  | 1057  | 1065 | 9              | HLA-A*02:01 | 1057          | 54             | 29529.57 | 54             | 29529.57    | 54          | TRUE         | TRUE              |
| 1     | FKNKDGFY   | 187   | 195  | 9              | HLA-A*02:01 | 187           | 54             | 29570.81 | 54             | 29570.81    | 54          | TRUE         | TRUE              |
| 1     | GECLGDINA  | 820   | 828  | 9              | HLA-A*02:01 | 820           | 54             | 29579.45 | 54             | 29579.45    | 54          | TRUE         | TRUE              |
| 1     | CYGVSATKL  | 366   | 374  | 9              | HLA-A*02:01 | 366           | 54             | 29625.88 | 54             | 29625.88    | 54          | TRUE         | TRUE              |
| 1     | CNFECDNP   | 128   | 136  | 9              | HLA-A*02:01 | 128           | 54             | 29648.97 | 54             | 29648.97    | 54          | TRUE         | TRUE              |
| 1     | DFCGKGYHL  | 1023  | 1031 | 9              | HLA-A*02:01 | 1023          | 54             | 29661.17 | 54             | 29661.17    | 54          | TRUE         | TRUE              |
| 1     | GRLOSQTQY  | 981   | 989  | 9              | HLA-A*02:01 | 981           | 54             | 29702.92 | 54             | 29702.92    | 54          | TRUE         | TRUE              |
| 1     | LRHGKLRPF  | 443   | 451  | 9              | HLA-A*02:01 | 443           | 54             | 29702.92 | 54             | 29702.92    | 54          | TRUE         | TRUE              |
| 1     | LVKLQSSNF  | 944   | 952  | 9              | HLA-A*02:01 | 944           | 55             | 29725.11 | 55             | 29725.11    | 55          | TRUE         | TRUE              |
| 1     | RVDFCGKGY  | 1021  | 1029 | 9              | HLA-A*02:01 | 1021          | 55             | 29757.6  | 55             | 29757.6     | 55          | TRUE         | TRUE              |
| 1     | DVVGIIINN  | 1109  | 1117 | 9              | HLA-A*02:01 | 1109          | 55             | 29811.1  | 55             | 29811.1     | 55          | TRUE         | TRUE              |
| 1     | LGINITNFR  | 224   | 232  | 9              | HLA-A*02:01 | 224           | 55             | 29924.53 | 55             | 29924.53    | 55          | TRUE         | TRUE              |
| 1     | LPPLLTDDM  | 843   | 851  | 9              | HLA-A*02:01 | 843           | 55             | 29935.23 | 55             | 29935.23    | 55          | TRUE         | TRUE              |
| 1     | DISPSCFSGG | 572   | 580  | 9              | HLA-A*02:01 | 572           | 55             | 29948.49 | 55             | 29948.49    | 55          | TRUE         | TRUE              |
| 1     | QIDRLITGR  | 974   | 982  | 9              | HLA-A*02:01 | 974           | 55             | 29966.98 | 55             | 29966.98    | 55          | TRUE         | TRUE              |
| 1     | VPSGDVVRF  | 308   | 316  | 9              | HLA-A*02:01 | 308           | 55             | 29967.95 | 55             | 29967.95    | 55          | TRUE         | TRUE              |
| 1     | TSQKSIVAY  | 669   | 677  | 9              | HLA-A*02:01 | 669           | 55             | 29996.51 | 55             | 29996.51    | 55          | TRUE         | TRUE              |
| 1     | VVFVNGTSW  | 1076  | 1084 | 9              | HLA-A*02:01 | 1076          | 55             | 30048.8  | 55             | 30048.8     | 55          | TRUE         | TRUE              |
| 1     | QSLQTYVTQ  | 984   | 992  | 9              | HLA-A*02:01 | 984           | 56             | 30072.86 | 56             | 30072.86    | 56          | TRUE         | TRUE              |
| 1     | AGCLGIAEH  | 633   | 641  | 9              | HLA-A*02:01 | 633           | 56             | 30100.86 | 56             | 30100.86    | 56          | TRUE         | TRUE              |
| 1     | YAWERKKIS  | 338   | 346  | 9              | HLA-A*02:01 | 338           | 56             | 30141.6  | 56             | 30141.6     | 56          | TRUE         | TRUE              |
| 1     | RFNGIGVTQ  | 887   | 895  | 9              | HLA-A*02:01 | 887           | 56             | 30166.72 | 56             | 30166.72    | 56          | TRUE         | TRUE              |
| 1     | SQILPDPKL  | 785   | 793  | 9              | HLA-A*02:01 | 785           | 56             | 30169.99 | 56             | 30169.99    | 56          | TRUE         | TRUE              |
| 1     | VFAQVKQMY  | 763   | 771  | 9              | HLA-A*02:01 | 763           | 56             | 30172.6  | 56             | 30172.6     | 56          | TRUE         | TRUE              |
| 1     | GVIADYNYK  | 403   | 411  | 9              | HLA-A*02:01 | 403           | 56             | 30202.66 | 56             | 30202.66    | 56          | TRUE         | TRUE              |
| 1     | LVSGTATAG  | 859   | 867  | 9              | HLA-A*02:01 | 859           | 56             | 30236.33 | 56             | 30236.33    | 56          | TRUE         | TRUE              |
| 1     | LFILTLTSGS | 6     | 14   | 9              | HLA-A*02:01 | 6             | 56             | 30240.25 | 56             | 30240.25    | 56          | TRUE         | TRUE              |
| 1     | IGIINNTVY  | 1112  | 1120 | 9              | HLA-A*02:01 | 1112          | 56             | 30252.03 | 56             | 30252.03    | 56          | TRUE         | TRUE              |
| 1     | LADAGFMKQ  | 810   | 818  | 9              | HLA-A*02:01 | 810           | 56             | 30307.06 | 56             | 30307.06    | 56          | TRUE         | TRUE              |
| 1     | TQTHTMIFD  | 146   | 154  | 9              | HLA-A*02:01 | 146           | 56             | 30327.42 | 56             | 30327.42    | 56          | TRUE         | TRUE              |
| 1     | WFITQRNFF  | 1084  | 1092 | 9              | HLA-A*02:01 | 1084          | 56             | 30347.76 | 56             | 30347.76    | 56          | TRUE         | TRUE              |
| 1     | MAYRFRNGIG | 884   | 892  | 9              | HLA-A*02:01 | 884           | 56             | 30357.94 | 56             | 30357.94    | 56          | TRUE         | TRUE              |
| 1     | NASVWNQIK  | 1155  | 1163 | 9              | HLA-A*02:01 | 1155          | 56             | 30371.75 | 56             | 30371.75    | 56          | TRUE         | TRUE              |
| 1     | NRAISGIAA  | 746   | 754  | 9              | HLA-A*02:01 | 746           | 56             | 30377.66 | 56             | 30377.66    | 56          | TRUE         | TRUE              |
| 1     | QALNTLVKQ  | 939   | 947  | 9              | HLA-A*02:01 | 939           | 56             | 30397.04 | 5.60E+01       | 3.04E+04    | 56          | TRUE         | TRUE              |
| 1     | KPIFKLPLG  | 217   | 225  | 9              | HLA-A*02:01 | 217           | 57             | 30437.87 | 5.70E+01       | 3.04E+04    | 57          | TRUE         | TRUE              |
| 1     | TSWFITQRN  | 1082  | 1090 | 9              | HLA-A*02:01 | 1082          | 57             | 30457.96 | 5.70E+01       | 3.05E+04    | 57          | TRUE         | TRUE              |
| 1     | ANLLQYGS   | 732   | 740  | 9              | HLA-A*02:01 | 732           | 57             | 30491.27 | 5.70E+01       | 3.05E+04    | 57          | TRUE         | TRUE              |
| 1     | LGDINARDL  | 823   | 831  | 9              | HLA-A*02:01 | 823           | 57             | 30499.51 | 5.70E+01       | 3.05E+04    | 57          | TRUE         | TRUE              |
| 1     | TGTGVLTPS  | 533   | 541  | 9              | HLA-A*02:01 | 533           | 57             | 30540.45 | 5.70E+01       | 3.05E+04    | 57          | TRUE         | TRUE              |
| 1     | GDSTECANL  | 726   | 734  | 9              | HLA-A*02:01 | 726           | 57             | 30559.64 | 5.70E+01       | 3.06E+04    | 57          | TRUE         | TRUE              |
| 1     | NSTFFSTFK  | 357   | 365  | 9              | HLA-A*02:01 | 357           | 57             | 30580.14 | 5.70E+01       | 3.06E+04    | 57          | TRUE         | TRUE              |
| 1     | TAPAICHEG  | 1059  | 1067 | 9              | HLA-A*02:01 | 1059          | 57             | 30642.74 | 5.70E+01       | 3.06E+04    | 57          | TRUE         | TRUE              |
| 1     | TDLIKNQCV  | 517   | 525  | 9              | HLA-A*02:01 | 517           | 57             | 30660.31 | 5.70E+01       | 3.07E+04    | 57          | TRUE         | TRUE              |
| 1     | FQOFGRDVS  | 548   | 556  | 9              | HLA-A*02:01 | 548           | 57             | 30674.57 | 5.70E+01       | 3.07E+04    | 57          | TRUE         | TRUE              |
| 1     | QAAPHGVVF  | 1036  | 1044 | 9              | HLA-A*02:01 | 1036          | 57             | 30725.73 | 5.70E+01       | 3.07E+04    | 57          | TRUE         | TRUE              |
| 1     | NTLVKQLSS  | 942   | 950  | 9              | HLA-A*02:01 | 942           | 57             | 30731.04 | 5.70E+01       | 3.07E+04    | 57          | TRUE         | TRUE              |
| 1     | SPVDLDGI   | 1143  | 1151 | 9              | HLA-A*02:01 | 1143          | 57             | 30737.37 | 5.70E+01       | 3.07E+04    | 57          | TRUE         | TRUE              |
| 1     | TSAAAYFVG  | 247   | 255  | 9              | HLA-A*02:01 | 247           | 57             | 30772.65 | 5.70E+01       | 3.08E+04    | 57          | TRUE         | TRUE              |
| 1     | CAQKFNGLT  | 833   | 841  | 9              | HLA-A*02:01 | 83            |                |          |                |             |             |              |                   |

| seq # | peptide    | start | end  | peptide length | allele      | peptide index | median binding | ann IC50 | ann percentile | legacy IC50 | legacy rank | scores equal | percentiles equal |
|-------|------------|-------|------|----------------|-------------|---------------|----------------|----------|----------------|-------------|-------------|--------------|-------------------|
| 1     | PNITNLCPF  | 317   | 325  | 9              | HLA-A*02:01 | 317           | 58             | 30830.97 | 5.80E+01       | 3.08E+04    | 58          | TRUE         | TRUE              |
| 1     | GAGICASYH  | 653   | 661  | 9              | HLA-A*02:01 | 653           | 58             | 30921.84 | 5.80E+01       | 3.09E+04    | 58          | TRUE         | TRUE              |
| 1     | KTPPTLYFG  | 772   | 780  | 9              | HLA-A*02:01 | 772           | 58             | 30942.92 | 5.80E+01       | 3.09E+04    | 58          | TRUE         | TRUE              |
| 1     | GTITDAVDC  | 270   | 278  | 9              | HLA-A*02:01 | 270           | 58             | 30963.34 | 5.80E+01       | 3.10E+04    | 58          | TRUE         | TRUE              |
| 1     | VRDPKTSEI  | 562   | 570  | 9              | HLA-A*02:01 | 562           | 58             | 30979.1  | 5.80E+01       | 3.10E+04    | 58          | TRUE         | TRUE              |
| 1     | LKPITFMKLK | 257   | 265  | 9              | HLA-A*02:01 | 257           | 58             | 31007.26 | 5.80E+01       | 3.10E+04    | 58          | TRUE         | TRUE              |
| 1     | PVSMAKTSTV | 710   | 718  | 9              | HLA-A*02:01 | 710           | 58             | 31052.59 | 5.80E+01       | 3.11E+04    | 58          | TRUE         | TRUE              |
| 1     | LFNKYTLAD  | 804   | 812  | 9              | HLA-A*02:01 | 804           | 58             | 31058.64 | 5.80E+01       | 3.11E+04    | 58          | TRUE         | TRUE              |
| 1     | IGVTQNVLY  | 891   | 899  | 9              | HLA-A*02:01 | 891           | 58             | 31081.5  | 5.80E+01       | 3.11E+04    | 58          | TRUE         | TRUE              |
| 1     | IWGTSAAY   | 244   | 252  | 9              | HLA-A*02:01 | 244           | 58             | 31084.19 | 5.80E+01       | 3.11E+04    | 58          | TRUE         | TRUE              |
| 1     | LSRLDKVEA  | 963   | 971  | 9              | HLA-A*02:01 | 963           | 59             | 31247.39 | 5.90E+01       | 3.12E+04    | 59          | TRUE         | TRUE              |
| 1     | EPVLKGVKL  | 1244  | 1252 | 9              | HLA-A*02:01 | 1244          | 59             | 31296.46 | 5.90E+01       | 3.13E+04    | 59          | TRUE         | TRUE              |
| 1     | AKTSVDCNM  | 714   | 722  | 9              | HLA-A*02:01 | 714           | 59             | 31303.24 | 5.90E+01       | 3.13E+04    | 59          | TRUE         | TRUE              |
| 1     | GNFKHLEF   | 177   | 185  | 9              | HLA-A*02:01 | 177           | 59             | 31333.05 | 5.90E+01       | 3.13E+04    | 59          | TRUE         | TRUE              |
| 1     | LPLGINITN  | 222   | 230  | 9              | HLA-A*02:01 | 222           | 59             | 31351.71 | 5.90E+01       | 3.14E+04    | 59          | TRUE         | TRUE              |
| 1     | PFGEVFNAT  | 324   | 332  | 9              | HLA-A*02:01 | 324           | 59             | 31396.51 | 5.90E+01       | 3.14E+04    | 59          | TRUE         | TRUE              |
| 1     | TQQLURAAE  | 991   | 999  | 9              | HLA-A*02:01 | 991           | 59             | 31400.25 | 5.90E+01       | 3.14E+04    | 59          | TRUE         | TRUE              |
| 1     | CFSNVYADS  | 378   | 386  | 9              | HLA-A*02:01 | 378           | 60             | 31506.42 | 6.00E+01       | 3.15E+04    | 60          | TRUE         | TRUE              |
| 1     | QTHTMIFDN  | 147   | 155  | 9              | HLA-A*02:01 | 147           | 60             | 31519.73 | 6.00E+01       | 3.15E+04    | 60          | TRUE         | TRUE              |
| 1     | YSTGNNVFD  | 622   | 630  | 9              | HLA-A*02:01 | 622           | 60             | 31534.74 | 6.00E+01       | 3.15E+04    | 60          | TRUE         | TRUE              |
| 1     | TSEILDISP  | 567   | 575  | 9              | HLA-A*02:01 | 567           | 60             | 31543.95 | 6.00E+01       | 3.15E+04    | 60          | TRUE         | TRUE              |
| 1     | CTDVSIAIH  | 603   | 611  | 9              | HLA-A*02:01 | 603           | 60             | 31564.1  | 6.00E+01       | 3.16E+04    | 60          | TRUE         | TRUE              |
| 1     | KGDDVRQIA  | 390   | 398  | 9              | HLA-A*02:01 | 390           | 60             | 31581.51 | 6.00E+01       | 3.16E+04    | 60          | TRUE         | TRUE              |
| 1     | LAATKMSEC  | 1006  | 1014 | 9              | HLA-A*02:01 | 1006          | 60             | 31588.01 | 6.00E+01       | 3.16E+04    | 60          | TRUE         | TRUE              |
| 1     | INASVVNIQ  | 1154  | 1162 | 9              | HLA-A*02:01 | 1154          | 60             | 31603.04 | 6.00E+01       | 3.16E+04    | 60          | TRUE         | TRUE              |
| 1     | VFNATKFPS  | 328   | 336  | 9              | HLA-A*02:01 | 328           | 60             | 31603.74 | 6.00E+01       | 3.16E+04    | 60          | TRUE         | TRUE              |
| 1     | TAIHADQLT  | 608   | 616  | 9              | HLA-A*02:01 | 608           | 60             | 31619.13 | 6.00E+01       | 3.16E+04    | 60          | TRUE         | TRUE              |
| 1     | NNYKYRYL   | 435   | 443  | 9              | HLA-A*02:01 | 435           | 60             | 31686.25 | 6.00E+01       | 3.17E+04    | 60          | TRUE         | TRUE              |
| 1     | VVYPDEIFR  | 40    | 48   | 9              | HLA-A*02:01 | 40            | 60             | 31699.61 | 6.00E+01       | 3.17E+04    | 60          | TRUE         | TRUE              |
| 1     | YKYRYLRHG  | 438   | 446  | 9              | HLA-A*02:01 | 438           | 60             | 31705.46 | 6.00E+01       | 3.17E+04    | 60          | TRUE         | TRUE              |
| 1     | NGTSTWFIT  | 1080  | 1088 | 9              | HLA-A*02:01 | 1080          | 60             | 31728.1  | 6.00E+01       | 3.17E+04    | 60          | TRUE         | TRUE              |
| 1     | LAECLKSVK  | 283   | 291  | 9              | HLA-A*02:01 | 283           | 60             | 31732.22 | 6.00E+01       | 3.17E+04    | 60          | TRUE         | TRUE              |
| 1     | FYSNVTFGH  | 62    | 70   | 9              | HLA-A*02:01 | 62            | 60             | 31744.93 | 6.00E+01       | 3.17E+04    | 60          | TRUE         | TRUE              |
| 1     | CSCLKGACS  | 1223  | 1231 | 9              | HLA-A*02:01 | 1223          | 60             | 31784.79 | 6.00E+01       | 3.18E+04    | 60          | TRUE         | TRUE              |
| 1     | AYTAALVSG  | 854   | 862  | 9              | HLA-A*02:01 | 854           | 61             | 31815.41 | 6.10E+01       | 3.18E+04    | 61          | TRUE         | TRUE              |
| 1     | SNFRVVPSP  | 303   | 311  | 9              | HLA-A*02:01 | 303           | 61             | 31825.06 | 6.10E+01       | 3.18E+04    | 61          | TRUE         | TRUE              |
| 1     | ATSTGNNY   | 430   | 438  | 9              | HLA-A*02:01 | 430           | 61             | 31900.22 | 6.10E+01       | 3.19E+04    | 61          | TRUE         | TRUE              |
| 1     | EAEVDQIRL  | 970   | 978  | 9              | HLA-A*02:01 | 970           | 61             | 31976.93 | 6.10E+01       | 3.20E+04    | 61          | TRUE         | TRUE              |
| 1     | SGDVRFPFN  | 310   | 318  | 9              | HLA-A*02:01 | 310           | 61             | 31978.66 | 6.10E+01       | 3.20E+04    | 61          | TRUE         | TRUE              |
| 1     | TQNVLYENQ  | 894   | 902  | 9              | HLA-A*02:01 | 894           | 61             | 31997.7  | 6.10E+01       | 3.20E+04    | 61          | TRUE         | TRUE              |
| 1     | YGSFCTQLN  | 738   | 746  | 9              | HLA-A*02:01 | 738           | 61             | 32006    | 6.10E+01       | 3.20E+04    | 61          | TRUE         | TRUE              |
| 1     | GPKLSTDLI  | 512   | 520  | 9              | HLA-A*02:01 | 512           | 61             | 32025.05 | 6.10E+01       | 3.20E+04    | 61          | TRUE         | TRUE              |
| 1     | TSCSCCLKG  | 1220  | 1228 | 9              | HLA-A*02:01 | 1220          | 61             | 32027.82 | 6.10E+01       | 3.20E+04    | 61          | TRUE         | TRUE              |
| 1     | ERDISNVFP  | 452   | 460  | 9              | HLA-A*02:01 | 452           | 61             | 32045.86 | 6.10E+01       | 3.20E+04    | 61          | TRUE         | TRUE              |
| 1     | TKLNDLCFS  | 372   | 380  | 9              | HLA-A*02:01 | 372           | 61             | 32104.86 | 6.10E+01       | 3.21E+04    | 61          | TRUE         | TRUE              |
| 1     | VNCTDVSTA  | 601   | 609  | 9              | HLA-A*02:01 | 601           | 61             | 32123.62 | 6.10E+01       | 3.21E+04    | 61          | TRUE         | TRUE              |
| 1     | VYPSQERNF  | 1049  | 1057 | 9              | HLA-A*02:01 | 1049          | 62             | 32175.1  | 6.20E+01       | 3.22E+04    | 62          | TRUE         | TRUE              |
| 1     | PIGAGICAS  | 651   | 659  | 9              | HLA-A*02:01 | 651           | 62             | 32266.78 | 6.20E+01       | 3.23E+04    | 62          | TRUE         | TRUE              |
| 1     | QAPNYTQHT  | 26    | 34   | 9              | HLA-A*02:01 | 26            | 62             | 32273.42 | 6.20E+01       | 3.23E+04    | 62          | TRUE         | TRUE              |
| 1     | CGPKLSTDL  | 511   | 519  | 9              | HLA-A*02:01 | 511           | 62             | 32286.7  | 6.20E+01       | 3.23E+04    | 62          | TRUE         | TRUE              |
| 1     | PFKDGIFYA  | 82    | 90   | 9              | HLA-A*02:01 | 82            | 62             | 32291.24 | 6.20E+01       | 3.23E+04    | 62          | TRUE         | TRUE              |
| 1     | DLQLGKYE   | 1181  | 1189 | 9              | HLA-A*02:01 | 1181          | 62             | 32334.58 | 6.20E+01       | 3.23E+04    | 62          | TRUE         | TRUE              |
| 1     | LREFVYKKN  | 182   | 190  | 9              | HLA-A*02:01 | 182           | 62             | 32338.44 | 6.20E+01       | 3.23E+04    | 62          | TRUE         | TRUE              |
| 1     | GKYEYQIKW  | 1186  | 1194 | 9              | HLA-A*02:01 | 1186          | 62             | 32395.51 | 6.20E+01       | 3.24E+04    | 62          | TRUE         | TRUE              |
| 1     | YNYKYRYLR  | 436   | 444  | 9              | HLA-A*02:01 | 436           | 62             | 32407.8  | 6.20E+01       | 3.24E+04    | 62          | TRUE         | TRUE              |
| 1     | ITFMKLKYE  | 260   | 268  | 9              | HLA-A*02:01 | 260           | 62             | 32422.52 | 6.20E+01       | 3.24E+04    | 62          | TRUE         | TRUE              |
| 1     | KHLEFVFK   | 180   | 188  | 9              | HLA-A*02:01 | 180           | 62             | 32426.38 | 6.20E+01       | 3.24E+04    | 62          | TRUE         | TRUE              |
| 1     | IYFAATEKS  | 87    | 95   | 9              | HLA-A*02:01 | 87            | 63             | 32529.33 | 6.30E+01       | 3.25E+04    | 63          | TRUE         | TRUE              |
| 1     | LGADSIAY   | 681   | 689  | 9              | HLA-A*02:01 | 681           | 63             | 32553.99 | 6.30E+01       | 3.26E+04    | 63          | TRUE         | TRUE              |
| 1     | NGLTGTGVL  | 530   | 538  | 9              | HLA-A*02:01 | 530           | 63             | 32558.56 | 6.30E+01       | 3.26E+04    | 63          | TRUE         | TRUE              |
| 1     | LPFYSNVYTG | 60    | 68   | 9              | HLA-A*02:01 | 60            | 63             | 32581.82 | 6.30E+01       | 3.26E+04    | 63          | TRUE         | TRUE              |
| 1     | KFPSYVAYE  | 333   | 341  | 9              | HLA-A*02:01 | 333           | 63             | 32617.81 | 6.30E+01       | 3.26E+04    | 63          | TRUE         | TRUE              |
| 1     | ENGITDAV   | 268   | 276  | 9              | HLA-A*02:01 | 268           | 63             | 32618.15 | 6.30E+01       | 3.26E+04    | 63          | TRUE         | TRUE              |
| 1     | EIFRSOTLY  | 45    | 53   | 9              | HLA-A*02:01 | 45            | 63             | 32632.98 | 6.30E+01       | 3.26E+04    | 63          | TRUE         | TRUE              |
| 1     | STGNNYKY   | 432   | 440  | 9              | HLA-A*02:01 | 432           | 63             | 32640.03 | 6.30E+01       | 3.26E+04    | 63          | TRUE         | TRUE              |
| 1     | TGVIAADYNY | 402   | 410  | 9              | HLA-A*02:01 | 402           | 63             | 32654.88 | 6.30E+01       | 3.27E+04    | 63          | TRUE         | TRUE              |
| 1     | ASANLAATK  | 1002  | 1010 | 9              | HLA-A*02:01 | 1002          | 63             | 32658.41 | 6.30E+01       | 3.27E+04    | 63          | TRUE         | TRUE              |
| 1     | PTLKYGGF   | 774   | 782  | 9              | HLA-A*02:01 | 774           | 63             | 32705.44 | 6.30E+01       | 3.27E+04    | 63          | TRUE         | TRUE              |
| 1     | NARDLICAQ  | 827   | 835  | 9              | HLA-A*02:01 | 827           | 63             | 32720.67 | 6.30E+01       | 3.27E+04    | 63          | TRUE         | TRUE              |
| 1     | DRCTTFDDV  | 17    | 25   | 9              | HLA-A*02:01 | 17            | 63             | 32729.51 | 6.30E+01       | 3.27E+04    | 63          | TRUE         | TRUE              |
| 1     | VFQTQAGCL  | 628   | 636  | 9              | HLA-A*02:01 | 628           | 63             | 32732    | 6.30E+01       | 3.27E+04    | 63          | TRUE         | TRUE              |
| 1     | HTINHTFGN  | 70    | 78   | 9              | HLA-A*02:01 | 70            | 63             | 32735.88 | 6.30E+01       | 3.27E+04    | 63          | TRUE         | TRUE              |
| 1     | CNMVYGGDS  | 720   | 728  | 9              | HLA-A*02:01 | 720           | 63             | 32751.83 | 6.30E+01       | 3.28E+04    | 63          | TRUE         | TRUE              |
| 1     | NFSISITTE  | 699   | 707  | 9              | HLA-A*02:01 | 699           | 64             | 32784.1  | 6.40E+01       | 3.28E+04    | 64          | TRUE         | TRUE              |
| 1     | DINARDJIC  | 825   | 833  | 9              | HLA-A*02:01 | 825           | 64             | 32828.11 | 6.40E+01       | 3.28E+04    | 64          | TRUE         | TRUE              |
| 1     | AKNLNESLI  | 1172  | 1180 | 9              | HLA-A*02:01 | 1172          | 64             | 32835.58 | 6.40E+01       | 3.28E+04    | 64          | TRUE         | TRUE              |
| 1     | GAGAAQLIP  | 871   | 879  | 9              | HLA-A*02:01 | 871           | 64             | 32841.25 | 6.40E+01       | 3.28E+04    | 64          | TRUE         | TRUE              |
| 1     | SVKSFEIDK  | 289   | 297  | 9              | HLA-A*02:01 | 289           | 64             | 32849.79 | 6.40E+01       | 3.28E+04    | 64          | TRUE         | TRUE              |
| 1     | DLDRCTTFD  | 15    | 23   | 9              | HLA-A*02:01 | 15            | 64             | 32877.15 | 6.40E+01       | 3.29E+04    | 64          | TRUE         | TRUE              |
| 1     | RACNFELCD  | 126   | 134  | 9              | HLA-A*02:01 | 126           | 64             | 32881.07 | 6.40E+01       | 3.29E+04    | 64          | TRUE         | TRUE              |
| 1     | ELDKYFNH   | 1133  | 1141 | 9              | HLA-A*02:01 | 1133          | 64             | 32887.84 | 6.40E+01       | 3.29E+04    | 64          | TRUE         | TRUE              |
| 1     | IDVVRDLPS  | 203   | 211  | 9              | HLA-A*02:01 | 203           | 64             | 32888.9  | 6.40E+01       | 3.29E+04    | 64          | TRUE         | TRUE              |
| 1     | RFQPFQOFG  | 544   | 552  | 9              | HLA-A*02:01 | 544           | 64             | 32959.44 | 6.40E+01       | 3.30E+04    | 64          | TRUE         | TRUE              |
| 1     | PDDFMGCVL  | 413   | 421  | 9              | HLA-A*02:01 | 413           | 64             | 32969.43 | 6.40E+01       | 3.30E+04    | 64          | TRUE         | TRUE              |
| 1     | LTSTTALG   | 920   | 928  | 9              | HLA-A*02:01 | 920           | 64             | 32971.21 | 6.40E+01       | 3.30E+04    | 64          | TRUE         | TRUE              |
| 1     | VSGTATAGW  | 860   | 868  | 9              | HLA-A*02:01 | 860           | 64             | 32971.21 | 6.40E+01       | 3.30E+04    | 64          | TRUE         | TRUE              |
| 1     | PFYSNVYTG  | 61    | 69   | 9              | HLA-A*02:01 | 61            | 64             | 32973    | 6.40E+01       | 3.30E+04    | 64          | TRUE         | TRUE              |
| 1     | YPDEIFRSD  | 42    | 50   | 9              | HLA-A*02:01 | 42            | 64             | 32999.4  | 6.40E+01       | 3.30E+04    | 64          | TRUE         | TRUE              |
| 1     | ESLTTSTA   | 918   | 926  | 9              | HLA-A*02:01 | 918           | 64             | 33016.54 | 6.40E+01       | 3.30E+04    | 64          | TRUE         | TRUE              |
| 1     | PFQQFGRDV  | 547   | 555  | 9              | HLA-A*02:01 | 547           | 64             | 33049.07 | 6.40E+01       | 3.30E+04    | 64          | TRUE         | TRUE              |
| 1     | ILSLRDKVE  | 962   | 970  | 9              | HLA-A*02:01 | 962           | 64             | 33069.45 | 6.40E+01       | 3.31E+04    | 64          | TRUE         | TRUE              |
| 1     | GFNFSQLP   | 781   | 789  | 9              | HLA-A*02:01 | 781           | 65             | 33147.55 | 6.50E+01       | 3.31E+04    | 65          | TRUE         | TRUE              |
| 1     | RSTQSQIV   | 667   | 675  | 9              | HLA-A*02:01 | 667           | 65             | 33182.72 | 6.50E+01       | 3.32E+04    | 65          | TRUE         | TRUE              |
| 1     | GAISSVLND  | 953   | 961  | 9              | HLA-A*02:01 | 953           | 65             | 33184.52 | 6.50E+01       | 3.32E+04    | 65          | TRUE         | TRUE              |
| 1</   |            |       |      |                |             |               |                |          |                |             |             |              |                   |

| seq # | peptide    | start | end  | peptide length | allele      | peptide index | median binding | ann IC50 | ann percentile | legacy IC50 | legacy rank | scores equal | percentiles equal |
|-------|------------|-------|------|----------------|-------------|---------------|----------------|----------|----------------|-------------|-------------|--------------|-------------------|
| 1     | VKGDVVRQI  | 389   | 397  | 9              | HLA-A*02:01 | 389           | 65             | 33393.06 | 6.50E+01       | 3.34E+04    | 65          | TRUE         | TRUE              |
| 1     | GACSCGSCC  | 1228  | 1236 | 9              | HLA-A*02:01 | 1228          | 66             | 33435.36 | 6.60E+01       | 3.34E+04    | 66          | TRUE         | TRUE              |
| 1     | QTGWADYN   | 401   | 409  | 9              | HLA-A*02:01 | 401           | 66             | 33446.57 | 6.60E+01       | 3.34E+04    | 66          | TRUE         | TRUE              |
| 1     | LNESLIDQL  | 1175  | 1183 | 9              | HLA-A*02:01 | 1175          | 66             | 33458.87 | 6.60E+01       | 3.35E+04    | 66          | TRUE         | TRUE              |
| 1     | APATVCGPK  | 506   | 514  | 9              | HLA-A*02:01 | 506           | 66             | 33500.89 | 6.60E+01       | 3.35E+04    | 66          | TRUE         | TRUE              |
| 1     | RDLPSCGNT  | 207   | 215  | 9              | HLA-A*02:01 | 207           | 66             | 33510.68 | 6.60E+01       | 3.35E+04    | 66          | TRUE         | TRUE              |
| 1     | IAAEQDRNT  | 752   | 760  | 9              | HLA-A*02:01 | 752           | 66             | 33599.64 | 6.60E+01       | 3.36E+04    | 66          | TRUE         | TRUE              |
| 1     | IFKLPLGIN  | 219   | 227  | 9              | HLA-A*02:01 | 219           | 66             | 33608.72 | 6.60E+01       | 3.36E+04    | 66          | TRUE         | TRUE              |
| 1     | VTYVPSQER  | 1047  | 1055 | 9              | HLA-A*02:01 | 1047          | 66             | 33633.46 | 6.60E+01       | 3.36E+04    | 66          | TRUE         | TRUE              |
| 1     | VIPFKDGIY  | 80    | 88   | 9              | HLA-A*02:01 | 80            | 66             | 33640.38 | 6.60E+01       | 3.36E+04    | 66          | TRUE         | TRUE              |
| 1     | VIHNNSTN   | 114   | 122  | 9              | HLA-A*02:01 | 114           | 66             | 33642.57 | 6.60E+01       | 3.36E+04    | 66          | TRUE         | TRUE              |
| 1     | TTTTGIGYQP | 485   | 493  | 9              | HLA-A*02:01 | 485           | 66             | 33655.68 | 6.60E+01       | 3.37E+04    | 66          | TRUE         | TRUE              |
| 1     | YTQHTSSMR  | 30    | 38   | 9              | HLA-A*02:01 | 30            | 66             | 33660.41 | 6.60E+01       | 3.37E+04    | 66          | TRUE         | TRUE              |
| 1     | ITAPAICHE  | 1058  | 1066 | 9              | HLA-A*02:01 | 1058          | 67             | 33724.55 | 6.70E+01       | 3.37E+04    | 67          | TRUE         | TRUE              |
| 1     | RQIAPGQTG  | 395   | 403  | 9              | HLA-A*02:01 | 395           | 67             | 33731.12 | 6.70E+01       | 3.37E+04    | 67          | TRUE         | TRUE              |
| 1     | HTSPVDVLG  | 1141  | 1149 | 9              | HLA-A*02:01 | 1141          | 67             | 33753.4  | 6.70E+01       | 3.38E+04    | 67          | TRUE         | TRUE              |
| 1     | NTRNIDATS  | 424   | 432  | 9              | HLA-A*02:01 | 424           | 67             | 33778.62 | 6.70E+01       | 3.38E+04    | 67          | TRUE         | TRUE              |
| 1     | TAGWTFGAG  | 865   | 873  | 9              | HLA-A*02:01 | 865           | 67             | 33791.04 | 6.70E+01       | 3.38E+04    | 67          | TRUE         | TRUE              |
| 1     | LNRLSLGIA  | 745   | 753  | 9              | HLA-A*02:01 | 745           | 67             | 33798.71 | 6.70E+01       | 3.38E+04    | 67          | TRUE         | TRUE              |
| 1     | RDPKTSFIL  | 563   | 571  | 9              | HLA-A*02:01 | 563           | 67             | 33810.05 | 6.70E+01       | 3.38E+04    | 67          | TRUE         | TRUE              |
| 1     | VVRFNPITN  | 313   | 321  | 9              | HLA-A*02:01 | 313           | 67             | 33879.26 | 6.70E+01       | 3.39E+04    | 67          | TRUE         | TRUE              |
| 1     | OAGGLIGAE  | 632   | 640  | 9              | HLA-A*02:01 | 632           | 67             | 33915.94 | 6.70E+01       | 3.39E+04    | 67          | TRUE         | TRUE              |
| 1     | VYADS FVVK | 382   | 390  | 9              | HLA-A*02:01 | 382           | 67             | 33936.86 | 6.70E+01       | 3.39E+04    | 67          | TRUE         | TRUE              |
| 1     | AYFPREGVF  | 1069  | 1077 | 9              | HLA-A*02:01 | 1069          | 67             | 33966.61 | 6.70E+01       | 3.40E+04    | 67          | TRUE         | TRUE              |
| 1     | GEVFNATKF  | 326   | 334  | 9              | HLA-A*02:01 | 326           | 67             | 33991.99 | 6.70E+01       | 3.40E+04    | 67          | TRUE         | TRUE              |
| 1     | TATAGWTFG  | 863   | 871  | 9              | HLA-A*02:01 | 863           | 67             | 33992.36 | 6.70E+01       | 3.40E+04    | 67          | TRUE         | TRUE              |
| 1     | DVNCTDVS   | 600   | 608  | 9              | HLA-A*02:01 | 600           | 67             | 34025.48 | 6.70E+01       | 3.40E+04    | 67          | TRUE         | TRUE              |
| 1     | NESLIDQL   | 1176  | 1184 | 9              | HLA-A*02:01 | 1176          | 67             | 34027.3  | 6.70E+01       | 3.40E+04    | 67          | TRUE         | TRUE              |
| 1     | PQAAHPGVV  | 1035  | 1043 | 9              | HLA-A*02:01 | 1035          | 67             | 34029.52 | 6.70E+01       | 3.40E+04    | 67          | TRUE         | TRUE              |
| 1     | SGNCDVVG   | 1105  | 1113 | 9              | HLA-A*02:01 | 1105          | 68             | 34084.8  | 6.80E+01       | 3.41E+04    | 68          | TRUE         | TRUE              |
| 1     | WPLNDYGFY  | 476   | 484  | 9              | HLA-A*02:01 | 476           | 68             | 34113.21 | 6.80E+01       | 3.41E+04    | 68          | TRUE         | TRUE              |
| 1     | FDDVQAPNY  | 22    | 30   | 9              | HLA-A*02:01 | 22            | 68             | 34126.86 | 6.80E+01       | 3.41E+04    | 68          | TRUE         | TRUE              |
| 1     | QQQGRDVS   | 549   | 557  | 9              | HLA-A*02:01 | 549           | 68             | 34129.45 | 6.80E+01       | 3.41E+04    | 68          | TRUE         | TRUE              |
| 1     | IKNQCVNFN  | 520   | 528  | 9              | HLA-A*02:01 | 520           | 68             | 34145.33 | 6.80E+01       | 3.41E+04    | 68          | TRUE         | TRUE              |
| 1     | NAPATVCGP  | 505   | 513  | 9              | HLA-A*02:01 | 505           | 68             | 34149.03 | 6.80E+01       | 3.41E+04    | 68          | TRUE         | TRUE              |
| 1     | ERNFTTAPA  | 1054  | 1062 | 9              | HLA-A*02:01 | 1054          | 68             | 34164.18 | 6.80E+01       | 3.42E+04    | 68          | TRUE         | TRUE              |
| 1     | VSLRLSTSQ  | 663   | 671  | 9              | HLA-A*02:01 | 663           | 68             | 34169.36 | 6.80E+01       | 3.42E+04    | 68          | TRUE         | TRUE              |
| 1     | EVQIRLIT   | 972   | 980  | 9              | HLA-A*02:01 | 972           | 68             | 34180.82 | 6.80E+01       | 3.42E+04    | 68          | TRUE         | TRUE              |
| 1     | DNPFPAVSK  | 134   | 142  | 9              | HLA-A*02:01 | 134           | 68             | 34192.66 | 6.80E+01       | 3.42E+04    | 68          | TRUE         | TRUE              |
| 1     | NATKFPVS   | 330   | 338  | 9              | HLA-A*02:01 | 330           | 68             | 34201.53 | 6.80E+01       | 3.42E+04    | 68          | TRUE         | TRUE              |
| 1     | GAEHVDTSG  | 638   | 646  | 9              | HLA-A*02:01 | 638           | 68             | 34254.86 | 6.80E+01       | 3.43E+04    | 68          | TRUE         | TRUE              |
| 1     | TOHTSSMRG  | 31    | 39   | 9              | HLA-A*02:01 | 31            | 68             | 34306.04 | 6.80E+01       | 3.43E+04    | 68          | TRUE         | TRUE              |
| 1     | TREVFQVQK  | 760   | 768  | 9              | HLA-A*02:01 | 760           | 68             | 34335.01 | 6.80E+01       | 3.43E+04    | 68          | TRUE         | TRUE              |
| 1     | ATVCGPKLS  | 508   | 516  | 9              | HLA-A*02:01 | 508           | 68             | 34335.76 | 6.80E+01       | 3.43E+04    | 68          | TRUE         | TRUE              |
| 1     | KPMGTQTH   | 142   | 150  | 9              | HLA-A*02:01 | 142           | 69             | 34350.25 | 6.90E+01       | 3.44E+04    | 69          | TRUE         | TRUE              |
| 1     | IDLQELGKY  | 1180  | 1188 | 9              | HLA-A*02:01 | 1180          | 69             | 34397.11 | 6.90E+01       | 3.44E+04    | 69          | TRUE         | TRUE              |
| 1     | NYKLPPDFM  | 409   | 417  | 9              | HLA-A*02:01 | 409           | 69             | 34426.89 | 6.90E+01       | 3.44E+04    | 69          | TRUE         | TRUE              |
| 1     | NFNFNGLTG  | 526   | 534  | 9              | HLA-A*02:01 | 526           | 69             | 34432.86 | 6.90E+01       | 3.44E+04    | 69          | TRUE         | TRUE              |
| 1     | GSDLRDCT   | 13    | 21   | 9              | HLA-A*02:01 | 13            | 69             | 34475.35 | 6.90E+01       | 3.45E+04    | 69          | TRUE         | TRUE              |
| 1     | AFSLDVS    | 167   | 175  | 9              | HLA-A*02:01 | 167           | 69             | 34479.82 | 6.90E+01       | 3.45E+04    | 69          | TRUE         | TRUE              |
| 1     | GYQPIDVVR  | 199   | 207  | 9              | HLA-A*02:01 | 199           | 69             | 34494.39 | 6.90E+01       | 3.45E+04    | 69          | TRUE         | TRUE              |
| 1     | IQKEIDRLN  | 1161  | 1169 | 9              | HLA-A*02:01 | 1161          | 69             | 34496.25 | 6.90E+01       | 3.45E+04    | 69          | TRUE         | TRUE              |
| 1     | ADQLTPAWR  | 612   | 620  | 9              | HLA-A*02:01 | 612           | 69             | 34504.09 | 6.90E+01       | 3.45E+04    | 69          | TRUE         | TRUE              |
| 1     | GNNVFTQQA  | 625   | 633  | 9              | HLA-A*02:01 | 625           | 69             | 34511.19 | 6.90E+01       | 3.45E+04    | 69          | TRUE         | TRUE              |
| 1     | DEIFRSOTL  | 44    | 52   | 9              | HLA-A*02:01 | 44            | 69             | 34545.54 | 6.90E+01       | 3.45E+04    | 69          | TRUE         | TRUE              |
| 1     | SECVLGQSK  | 1012  | 1020 | 9              | HLA-A*02:01 | 1012          | 69             | 34546.66 | 6.90E+01       | 3.45E+04    | 69          | TRUE         | TRUE              |
| 1     | ISIQQUEST  | 913   | 921  | 9              | HLA-A*02:01 | 913           | 69             | 34591.56 | 6.90E+01       | 3.46E+04    | 69          | TRUE         | TRUE              |
| 1     | AICHEGKAY  | 1062  | 1070 | 9              | HLA-A*02:01 | 1062          | 69             | 34617.76 | 6.90E+01       | 3.46E+04    | 69          | TRUE         | TRUE              |
| 1     | PSSKRFQFP  | 540   | 548  | 9              | HLA-A*02:01 | 540           | 70             | 34641.36 | 7.00E+01       | 3.46E+04    | 70          | TRUE         | TRUE              |
| 1     | PREGVVFVN  | 1072  | 1080 | 9              | HLA-A*02:01 | 1072          | 70             | 34676.61 | 7.00E+01       | 3.47E+04    | 70          | TRUE         | TRUE              |
| 1     | SATKNDLCL  | 370   | 378  | 9              | HLA-A*02:01 | 370           | 70             | 34697.64 | 7.00E+01       | 3.47E+04    | 70          | TRUE         | TRUE              |
| 1     | DIPIGAGIC  | 649   | 657  | 9              | HLA-A*02:01 | 649           | 70             | 34698    | 7.00E+01       | 3.47E+04    | 70          | TRUE         | TRUE              |
| 1     | TVSLRLSTS  | 662   | 670  | 9              | HLA-A*02:01 | 662           | 70             | 34758.52 | 7.00E+01       | 3.48E+04    | 70          | TRUE         | TRUE              |
| 1     | QTSNFRVVP  | 301   | 309  | 9              | HLA-A*02:01 | 301           | 70             | 34763.78 | 7.00E+01       | 3.48E+04    | 70          | TRUE         | TRUE              |
| 1     | CSVKSFEID  | 288   | 296  | 9              | HLA-A*02:01 | 288           | 70             | 34770.53 | 7.00E+01       | 3.48E+04    | 70          | TRUE         | TRUE              |
| 1     | PFAMQMAYR  | 879   | 887  | 9              | HLA-A*02:01 | 879           | 70             | 34814.22 | 7.00E+01       | 3.48E+04    | 70          | TRUE         | TRUE              |
| 1     | PPLLTDDMI  | 844   | 852  | 9              | HLA-A*02:01 | 844           | 70             | 34833.8  | 7.00E+01       | 3.48E+04    | 70          | TRUE         | TRUE              |
| 1     | GFNTLKPFI  | 212   | 220  | 9              | HLA-A*02:01 | 212           | 70             | 34840.97 | 7.00E+01       | 3.48E+04    | 70          | TRUE         | TRUE              |
| 1     | IGAELHVDTS | 637   | 645  | 9              | HLA-A*02:01 | 637           | 70             | 34878.31 | 7.00E+01       | 3.49E+04    | 70          | TRUE         | TRUE              |
| 1     | FNKAISQIL  | 909   | 917  | 9              | HLA-A*02:01 | 909           | 70             | 34883.6  | 7.00E+01       | 3.49E+04    | 70          | TRUE         | TRUE              |
| 1     | TLTSGSLDL  | 9     | 17   | 9              | HLA-A*02:01 | 9             | 70             | 34918.33 | 7.00E+01       | 3.49E+04    | 70          | TRUE         | TRUE              |
| 1     | OHTSSMRGV  | 32    | 40   | 9              | HLA-A*02:01 | 32            | 70             | 34928.15 | 7.00E+01       | 3.49E+04    | 70          | TRUE         | TRUE              |
| 1     | GWTFGAGAA  | 867   | 875  | 9              | HLA-A*02:01 | 867           | 71             | 34945.54 | 7.10E+01       | 3.49E+04    | 71          | TRUE         | TRUE              |
| 1     | RDISNVFVS  | 453   | 461  | 9              | HLA-A*02:01 | 453           | 71             | 34970.14 | 7.10E+01       | 3.50E+04    | 71          | TRUE         | TRUE              |
| 1     | DVVRFPNIT  | 312   | 320  | 9              | HLA-A*02:01 | 312           | 71             | 34972.39 | 7.10E+01       | 3.50E+04    | 71          | TRUE         | TRUE              |
| 1     | MYKPTPLKY  | 770   | 778  | 9              | HLA-A*02:01 | 770           | 71             | 34974.67 | 7.10E+01       | 3.50E+04    | 71          | TRUE         | TRUE              |
| 1     | DVDLGDISG  | 1145  | 1153 | 9              | HLA-A*02:01 | 1145          | 71             | 35003.05 | 7.10E+01       | 3.50E+04    | 71          | TRUE         | TRUE              |
| 1     | TGNNVFQTQ  | 624   | 632  | 9              | HLA-A*02:01 | 624           | 71             | 35004.95 | 7.10E+01       | 3.50E+04    | 71          | TRUE         | TRUE              |
| 1     | LPSGFNTLK  | 209   | 217  | 9              | HLA-A*02:01 | 209           | 71             | 35029.59 | 7.10E+01       | 3.50E+04    | 71          | TRUE         | TRUE              |
| 1     | PQIITDNT   | 1094  | 1102 | 9              | HLA-A*02:01 | 1094          | 71             | 35048.16 | 7.10E+01       | 3.50E+04    | 71          | TRUE         | TRUE              |
| 1     | VDCNMVIGG  | 718   | 726  | 9              | HLA-A*02:01 | 718           | 71             | 35133.21 | 7.10E+01       | 3.51E+04    | 71          | TRUE         | TRUE              |
| 1     | SFKEELDKY  | 1129  | 1137 | 9              | HLA-A*02:01 | 1129          | 71             | 35165.92 | 7.10E+01       | 3.52E+04    | 71          | TRUE         | TRUE              |
| 1     | TINHFTGNP  | 71    | 79   | 9              | HLA-A*02:01 | 71            | 71             | 35173.16 | 7.10E+01       | 3.52E+04    | 71          | TRUE         | TRUE              |
| 1     | DGIYFAATE  | 85    | 93   | 9              | HLA-A*02:01 | 85            | 71             | 35226.09 | 7.10E+01       | 3.52E+04    | 71          | TRUE         | TRUE              |
| 1     | NPFPAVSKP  | 135   | 143  | 9              | HLA-A*02:01 | 135           | 72             | 35250.09 | 7.20E+01       | 3.53E+04    | 72          | TRUE         | TRUE              |
| 1     | IDRLNEVAK  | 1165  | 1173 | 9              | HLA-A*02:01 | 1165          | 72             | 35252    | 7.20E+01       | 3.53E+04    | 72          | TRUE         | TRUE              |
| 1     | PATVCGPKL  | 507   | 515  | 9              | HLA-A*02:01 | 507           | 72             | 35258.12 | 7.20E+01       | 3.53E+04    | 72          | TRUE         | TRUE              |
| 1     | NTVYDPLQP  | 1117  | 1125 | 9              | HLA-A*02:01 | 1117          | 72             | 35261.55 | 7.20E+01       | 3.53E+04    | 72          | TRUE         | TRUE              |
| 1     | FNIGIVTQN  | 888   | 896  | 9              | HLA-A*02:01 | 888           | 72             | 35277.95 | 7.20E+01       | 3.53E+04    | 72          | TRUE         | TRUE              |
| 1     | FERDISNVP  | 451   | 459  | 9              | HLA-A*02:01 | 451           | 72             | 35290.17 | 7.20E+01       | 3.53E+04    | 72          | TRUE         | TRUE              |
| 1     | TTTTSTALGK | 921   | 929  | 9              | HLA-A*02:01 | 921           | 72             | 35298.57 | 7.20E+01       | 3.53E+04    | 72          | TRUE         | TRUE              |
| 1     | VFKNKDGFEL | 186   | 194  | 9              | HLA-A*02:01 | 186           | 72             | 35311.93 | 7.20E+01       | 3.53E+04    | 72          | TRUE         | TRUE              |
| 1     | LOELGKYEQ  | 1182  | 1190 | 9              | HLA-A*02:01 | 1182          | 72             | 35339.09 | 7.20E+01       | 3.53E+04    | 72          | TRUE         | TRUE              |
| 1     | CCSLKGAC   | 1222  | 1230 | 9              | HLA-A*02:01 | 1222          | 72             | 35357.05 | 7.20E+         |             |             |              |                   |

| seq # | peptide    | start | end  | peptide length | allele      | peptide index | median binding | ann IC50 | ann percentile | legacy IC50 | legacy rank | scores equal | percentiles equal |
|-------|------------|-------|------|----------------|-------------|---------------|----------------|----------|----------------|-------------|-------------|--------------|-------------------|
| 1     | DLICAQKFN  | 830   | 838  | 9              | HLA-A*02:01 | 830           | 73             | 35556.93 | 7.30E+01       | 3.56E+04    | 73          | TRUE         | TRUE              |
| 1     | LNTLVKQLS  | 941   | 949  | 9              | HLA-A*02:01 | 941           | 73             | 35561.17 | 7.30E+01       | 3.56E+04    | 73          | TRUE         | TRUE              |
| 1     | VEAEVQIDR  | 969   | 977  | 9              | HLA-A*02:01 | 969           | 73             | 35588.89 | 7.30E+01       | 3.56E+04    | 73          | TRUE         | TRUE              |
| 1     | QELGKYEQY  | 1183  | 1191 | 9              | HLA-A*02:01 | 1183          | 73             | 35596.19 | 7.30E+01       | 3.56E+04    | 73          | TRUE         | TRUE              |
| 1     | PIDVVVRDLP | 202   | 210  | 9              | HLA-A*02:01 | 202           | 73             | 35611.23 | 7.30E+01       | 3.56E+04    | 73          | TRUE         | TRUE              |
| 1     | LNCYWPLND  | 472   | 480  | 9              | HLA-A*02:01 | 472           | 73             | 35692.62 | 7.30E+01       | 3.57E+04    | 73          | TRUE         | TRUE              |
| 1     | ACNFELCDN  | 127   | 135  | 9              | HLA-A*02:01 | 127           | 74             | 35823    | 7.40E+01       | 3.58E+04    | 74          | TRUE         | TRUE              |
| 1     | ASVVNIQKE  | 1156  | 1164 | 9              | HLA-A*02:01 | 1156          | 74             | 35861.37 | 7.40E+01       | 3.59E+04    | 74          | TRUE         | TRUE              |
| 1     | SKRVDFCGK  | 1019  | 1027 | 9              | HLA-A*02:01 | 1019          | 74             | 35888.16 | 7.40E+01       | 3.59E+04    | 74          | TRUE         | TRUE              |
| 1     | CGKGYHMLS  | 1025  | 1033 | 9              | HLA-A*02:01 | 1025          | 74             | 35943.73 | 7.40E+01       | 3.59E+04    | 74          | TRUE         | TRUE              |
| 1     | VFGSTMNNK  | 102   | 110  | 9              | HLA-A*02:01 | 102           | 74             | 35957.34 | 7.40E+01       | 3.60E+04    | 74          | TRUE         | TRUE              |
| 1     | EKSNNVVRVG | 93    | 101  | 9              | HLA-A*02:01 | 93            | 74             | 35969.43 | 7.40E+01       | 3.60E+04    | 74          | TRUE         | TRUE              |
| 1     | VVPSGDVVR  | 307   | 315  | 9              | HLA-A*02:01 | 307           | 74             | 35980.7  | 7.40E+01       | 3.60E+04    | 74          | TRUE         | TRUE              |
| 1     | AELKSVKS   | 284   | 292  | 9              | HLA-A*02:01 | 284           | 74             | 36000.57 | 7.40E+01       | 3.60E+04    | 74          | TRUE         | TRUE              |
| 1     | DVNVQNAQA  | 932   | 940  | 9              | HLA-A*02:01 | 932           | 74             | 36030.58 | 7.40E+01       | 3.60E+04    | 74          | TRUE         | TRUE              |
| 1     | DCNMYYICGD | 719   | 727  | 9              | HLA-A*02:01 | 719           | 74             | 36068.01 | 7.40E+01       | 3.61E+04    | 74          | TRUE         | TRUE              |
| 1     | SDAFSLDVS  | 165   | 173  | 9              | HLA-A*02:01 | 165           | 74             | 36070.75 | 7.40E+01       | 3.61E+04    | 74          | TRUE         | TRUE              |
| 1     | SCGSGCKFD  | 1231  | 1239 | 9              | HLA-A*02:01 | 1231          | 75             | 36094.95 | 7.50E+01       | 3.61E+04    | 75          | TRUE         | TRUE              |
| 1     | LNILSLRLD  | 959   | 967  | 9              | HLA-A*02:01 | 959           | 75             | 36107.46 | 7.50E+01       | 3.61E+04    | 75          | TRUE         | TRUE              |
| 1     | TFGAGAAIQ  | 869   | 877  | 9              | HLA-A*02:01 | 869           | 75             | 36119.96 | 7.50E+01       | 3.61E+04    | 75          | TRUE         | TRUE              |
| 1     | TGRLQSLQT  | 980   | 988  | 9              | HLA-A*02:01 | 980           | 75             | 36143.01 | 7.50E+01       | 3.61E+04    | 75          | TRUE         | TRUE              |
| 1     | LGQSKRVDF  | 1016  | 1024 | 9              | HLA-A*02:01 | 1016          | 75             | 36146.53 | 7.50E+01       | 3.61E+04    | 75          | TRUE         | TRUE              |
| 1     | GFYTTTGIG  | 482   | 490  | 9              | HLA-A*02:01 | 482           | 75             | 36178.62 | 7.50E+01       | 3.62E+04    | 75          | TRUE         | TRUE              |
| 1     | ECDPGAG    | 647   | 655  | 9              | HLA-A*02:01 | 647           | 75             | 36205.64 | 7.50E+01       | 3.62E+04    | 75          | TRUE         | TRUE              |
| 1     | PTNFSISIT  | 697   | 705  | 9              | HLA-A*02:01 | 697           | 75             | 36209.17 | 7.50E+01       | 3.62E+04    | 75          | TRUE         | TRUE              |
| 1     | SFEIDKGIY  | 292   | 300  | 9              | HLA-A*02:01 | 292           | 75             | 36254.25 | 7.50E+01       | 3.63E+04    | 75          | TRUE         | TRUE              |
| 1     | LCPFGEVFN  | 322   | 330  | 9              | HLA-A*02:01 | 322           | 75             | 36267.2  | 7.50E+01       | 3.63E+04    | 75          | TRUE         | TRUE              |
| 1     | LSTDLIKNQ  | 515   | 523  | 9              | HLA-A*02:01 | 515           | 75             | 36267.2  | 7.50E+01       | 3.63E+04    | 75          | TRUE         | TRUE              |
| 1     | ECLGDINAR  | 821   | 829  | 9              | HLA-A*02:01 | 821           | 75             | 36322.96 | 7.50E+01       | 3.63E+04    | 75          | TRUE         | TRUE              |
| 1     | EVFNATKFP  | 327   | 335  | 9              | HLA-A*02:01 | 327           | 76             | 36410.7  | 7.60E+01       | 3.64E+04    | 76          | TRUE         | TRUE              |
| 1     | LDISPCSGF  | 571   | 579  | 9              | HLA-A*02:01 | 571           | 76             | 36413.86 | 7.60E+01       | 3.64E+04    | 76          | TRUE         | TRUE              |
| 1     | STMNNKSQS  | 105   | 113  | 9              | HLA-A*02:01 | 105           | 76             | 36444.59 | 7.60E+01       | 3.64E+04    | 76          | TRUE         | TRUE              |
| 1     | LKGACSCGS  | 1226  | 1234 | 9              | HLA-A*02:01 | 1226          | 76             | 36447.37 | 7.60E+01       | 3.64E+04    | 76          | TRUE         | TRUE              |
| 1     | AFSPAQDIW  | 237   | 245  | 9              | HLA-A*02:01 | 237           | 76             | 36447.77 | 7.60E+01       | 3.64E+04    | 76          | TRUE         | TRUE              |
| 1     | HEGKAYFPR  | 1065  | 1073 | 9              | HLA-A*02:01 | 1065          | 76             | 36465.12 | 7.60E+01       | 3.65E+04    | 76          | TRUE         | TRUE              |
| 1     | APAICHEGK  | 1060  | 1068 | 9              | HLA-A*02:01 | 1060          | 76             | 36488.79 | 7.60E+01       | 3.65E+04    | 76          | TRUE         | TRUE              |
| 1     | KYEQYKWP   | 1187  | 1195 | 9              | HLA-A*02:01 | 1187          | 76             | 36506.96 | 7.60E+01       | 3.65E+04    | 76          | TRUE         | TRUE              |
| 1     | NIDATSTGN  | 427   | 435  | 9              | HLA-A*02:01 | 427           | 76             | 36508.13 | 7.60E+01       | 3.65E+04    | 76          | TRUE         | TRUE              |
| 1     | KGACSCGSC  | 1227  | 1235 | 9              | HLA-A*02:01 | 1227          | 76             | 36522.36 | 7.60E+01       | 3.65E+04    | 76          | TRUE         | TRUE              |
| 1     | VDTSYECDI  | 642   | 650  | 9              | HLA-A*02:01 | 642           | 76             | 36567.44 | 7.60E+01       | 3.66E+04    | 76          | TRUE         | TRUE              |
| 1     | GKLODVVNQ  | 928   | 936  | 9              | HLA-A*02:01 | 928           | 76             | 36571.8  | 7.60E+01       | 3.66E+04    | 76          | TRUE         | TRUE              |
| 1     | IDKGYQTS   | 295   | 303  | 9              | HLA-A*02:01 | 295           | 76             | 36593.56 | 7.60E+01       | 3.66E+04    | 76          | TRUE         | TRUE              |
| 1     | IADYNYKPL  | 405   | 413  | 9              | HLA-A*02:01 | 405           | 77             | 36641.5  | 7.70E+01       | 3.66E+04    | 77          | TRUE         | TRUE              |
| 1     | DKVEAEVOI  | 967   | 975  | 9              | HLA-A*02:01 | 967           | 77             | 36658.16 | 7.70E+01       | 3.67E+04    | 77          | TRUE         | TRUE              |
| 1     | AGFMKQYGE  | 813   | 821  | 9              | HLA-A*02:01 | 813           | 77             | 36696.27 | 7.70E+01       | 3.67E+04    | 77          | TRUE         | TRUE              |
| 1     | PPALNCYWP  | 469   | 477  | 9              | HLA-A*02:01 | 469           | 77             | 36731.61 | 7.70E+01       | 3.67E+04    | 77          | TRUE         | TRUE              |
| 1     | LSGIAAEQD  | 749   | 757  | 9              | HLA-A*02:01 | 749           | 77             | 36737.96 | 7.70E+01       | 3.67E+04    | 77          | TRUE         | TRUE              |
| 1     | PKTSEILDI  | 565   | 573  | 9              | HLA-A*02:01 | 565           | 77             | 36750.69 | 7.70E+01       | 3.68E+04    | 77          | TRUE         | TRUE              |
| 1     | FFAVSKPMG  | 137   | 145  | 9              | HLA-A*02:01 | 137           | 77             | 36757.07 | 7.70E+01       | 3.68E+04    | 77          | TRUE         | TRUE              |
| 1     | QFGRDVSDF  | 550   | 558  | 9              | HLA-A*02:01 | 550           | 77             | 36760.24 | 7.70E+01       | 3.68E+04    | 77          | TRUE         | TRUE              |
| 1     | KGIYQTSNF  | 297   | 305  | 9              | HLA-A*02:01 | 297           | 77             | 36804.81 | 7.70E+01       | 3.68E+04    | 77          | TRUE         | TRUE              |
| 1     | VDCSQNPLA  | 276   | 284  | 9              | HLA-A*02:01 | 276           | 77             | 36849.44 | 7.70E+01       | 3.68E+04    | 77          | TRUE         | TRUE              |
| 1     | EKSGNFKHL  | 174   | 182  | 9              | HLA-A*02:01 | 174           | 77             | 36853.81 | 7.70E+01       | 3.69E+04    | 77          | TRUE         | TRUE              |
| 1     | PLKPTKRFS  | 791   | 799  | 9              | HLA-A*02:01 | 791           | 77             | 36857.81 | 7.70E+01       | 3.69E+04    | 77          | TRUE         | TRUE              |
| 1     | NNSTNVVIR  | 118   | 126  | 9              | HLA-A*02:01 | 118           | 77             | 36860.99 | 7.70E+01       | 3.69E+04    | 77          | TRUE         | TRUE              |
| 1     | LHVTVPVSQ  | 1045  | 1053 | 9              | HLA-A*02:01 | 1045          | 77             | 36891.72 | 7.70E+01       | 3.69E+04    | 77          | TRUE         | TRUE              |
| 1     | MNNKSQSVI  | 107   | 115  | 9              | HLA-A*02:01 | 107           | 77             | 36893.31 | 7.70E+01       | 3.69E+04    | 77          | TRUE         | TRUE              |
| 1     | ERKKISNCV  | 341   | 349  | 9              | HLA-A*02:01 | 341           | 77             | 36918.09 | 7.70E+01       | 3.69E+04    | 77          | TRUE         | TRUE              |
| 1     | TPTLKYYFG  | 773   | 781  | 9              | HLA-A*02:01 | 773           | 78             | 36921.68 | 7.80E+01       | 3.69E+04    | 78          | TRUE         | TRUE              |
| 1     | CHEGKAYFP  | 1064  | 1072 | 9              | HLA-A*02:01 | 1064          | 78             | 36956.85 | 7.80E+01       | 3.70E+04    | 78          | TRUE         | TRUE              |
| 1     | VSVITPGTN  | 581   | 589  | 9              | HLA-A*02:01 | 581           | 78             | 36972.44 | 7.80E+01       | 3.70E+04    | 78          | TRUE         | TRUE              |
| 1     | DYSVLYNST  | 351   | 359  | 9              | HLA-A*02:01 | 351           | 78             | 36987.65 | 7.80E+01       | 3.70E+04    | 78          | TRUE         | TRUE              |
| 1     | PFERDISNV  | 450   | 458  | 9              | HLA-A*02:01 | 450           | 78             | 37047.72 | 7.80E+01       | 3.70E+04    | 78          | TRUE         | TRUE              |
| 1     | PAWRIYSTG  | 617   | 625  | 9              | HLA-A*02:01 | 617           | 78             | 37058.54 | 7.80E+01       | 3.71E+04    | 78          | TRUE         | TRUE              |
| 1     | PSGDVVRFP  | 309   | 317  | 9              | HLA-A*02:01 | 309           | 78             | 37075.39 | 7.80E+01       | 3.71E+04    | 78          | TRUE         | TRUE              |
| 1     | TFDDVQAPN  | 21    | 29   | 9              | HLA-A*02:01 | 21            | 78             | 37104.7  | 7.80E+01       | 3.71E+04    | 78          | TRUE         | TRUE              |
| 1     | SPCSFGGVS  | 574   | 582  | 9              | HLA-A*02:01 | 574           | 78             | 37109.91 | 7.80E+01       | 3.71E+04    | 78          | TRUE         | TRUE              |
| 1     | VQAPNYTQH  | 25    | 33   | 9              | HLA-A*02:01 | 25            | 78             | 37120.35 | 7.80E+01       | 3.71E+04    | 78          | TRUE         | TRUE              |
| 1     | YGECIGDIN  | 819   | 827  | 9              | HLA-A*02:01 | 819           | 78             | 37142.86 | 7.80E+01       | 3.71E+04    | 78          | TRUE         | TRUE              |
| 1     | NFTTAPAI   | 1056  | 1064 | 9              | HLA-A*02:01 | 1056          | 78             | 37194.32 | 7.80E+01       | 3.72E+04    | 78          | TRUE         | TRUE              |
| 1     | GDISGINAS  | 1149  | 1157 | 9              | HLA-A*02:01 | 1149          | 79             | 37216.88 | 7.90E+01       | 3.72E+04    | 79          | TRUE         | TRUE              |
| 1     | DENGITIDA  | 267   | 275  | 9              | HLA-A*02:01 | 267           | 79             | 37248.7  | 7.90E+01       | 3.72E+04    | 79          | TRUE         | TRUE              |
| 1     | QSKRVDFCG  | 1018  | 1026 | 9              | HLA-A*02:01 | 1018          | 79             | 37251.5  | 7.90E+01       | 3.73E+04    | 79          | TRUE         | TRUE              |
| 1     | HGKLRFPER  | 445   | 453  | 9              | HLA-A*02:01 | 445           | 79             | 37287    | 7.90E+01       | 3.73E+04    | 79          | TRUE         | TRUE              |
| 1     | DVRQIAPGQ  | 393   | 401  | 9              | HLA-A*02:01 | 393           | 79             | 37288.62 | 7.90E+01       | 3.73E+04    | 79          | TRUE         | TRUE              |
| 1     | NHTSPDVL   | 1140  | 1148 | 9              | HLA-A*02:01 | 1140          | 79             | 37318.09 | 7.90E+01       | 3.73E+04    | 79          | TRUE         | TRUE              |
| 1     | TSGSDLDR   | 11    | 19   | 9              | HLA-A*02:01 | 11            | 79             | 37324.12 | 7.90E+01       | 3.73E+04    | 79          | TRUE         | TRUE              |
| 1     | LAWNTRNID  | 421   | 429  | 9              | HLA-A*02:01 | 421           | 79             | 37362.11 | 7.90E+01       | 3.74E+04    | 79          | TRUE         | TRUE              |
| 1     | KYDENGIT   | 265   | 273  | 9              | HLA-A*02:01 | 265           | 79             | 37386.38 | 7.90E+01       | 3.74E+04    | 79          | TRUE         | TRUE              |
| 1     | NFRVVPSPG  | 304   | 312  | 9              | HLA-A*02:01 | 304           | 79             | 37424.01 | 7.90E+01       | 3.74E+04    | 79          | TRUE         | TRUE              |
| 1     | AVSKPMGTQ  | 139   | 147  | 9              | HLA-A*02:01 | 139           | 79             | 37425.24 | 7.90E+01       | 3.74E+04    | 79          | TRUE         | TRUE              |
| 1     | SYECDPIIG  | 645   | 653  | 9              | HLA-A*02:01 | 645           | 79             | 37442.64 | 7.90E+01       | 3.74E+04    | 79          | TRUE         | TRUE              |
| 1     | VSDFTDSVR  | 555   | 563  | 9              | HLA-A*02:01 | 555           | 79             | 37451.97 | 7.90E+01       | 3.75E+04    | 79          | TRUE         | TRUE              |
| 1     | QESLTTTST  | 917   | 925  | 9              | HLA-A*02:01 | 917           | 79             | 37456.03 | 7.90E+01       | 3.75E+04    | 79          | TRUE         | TRUE              |
| 1     | PSQERNFTT  | 1051  | 1059 | 9              | HLA-A*02:01 | 1051          | 80             | 37494.94 | 8.00E+01       | 3.75E+04    | 80          | TRUE         | TRUE              |
| 1     | ICASYHTVS  | 656   | 664  | 9              | HLA-A*02:01 | 656           | 80             | 37504.27 | 8.00E+01       | 3.75E+04    | 80          | TRUE         | TRUE              |
| 1     | FHTINHFTG  | 69    | 77   | 9              | HLA-A*02:01 | 69            | 80             | 37507.51 | 8.00E+01       | 3.75E+04    | 80          | TRUE         | TRUE              |
| 1     | GDINARDLI  | 824   | 832  | 9              | HLA-A*02:01 | 824           | 80             | 37590.82 | 8.00E+01       | 3.76E+04    | 80          | TRUE         | TRUE              |
| 1     | DRUITGRLO  | 976   | 984  | 9              | HLA-A*02:01 | 976           | 80             | 37593.65 | 8.00E+01       | 3.76E+04    | 80          | TRUE         | TRUE              |
| 1     | NNKSQSVII  | 108   | 116  | 9              | HLA-A*02:01 | 108           | 80             | 37599.35 | 8.00E+01       | 3.76E+04    | 80          | TRUE         | TRUE              |
| 1     | KSGNFKHLR  | 175   | 183  | 9              | HLA-A*02:01 | 175           | 80             | 37600.97 | 8.00E+01       | 3.76E+04    | 80          | TRUE         | TRUE              |
| 1     | VKQLSSNFG  | 945   | 953  | 9              | HLA-A*02:01 | 945           | 80             | 37601.39 | 8.00E+01       | 3.76E+04    | 80          | TRUE         | TRUE              |
| 1     | RKKISNCVA  | 342   | 350  | 9              | HLA-A*02:01 | 342           | 80             | 37609.51 | 8.00E+01       | 3.76E+04    | 80          | TRUE         | TRUE              |
| 1     | RNTRVFAAQ  | 758   | 766  | 9              | HLA-A*02:01 | 758           | 80             | 37617.25 | 8.00E+0        |             |             |              |                   |

| seq # | peptide    | start | end  | peptide length | allele      | peptide index | median binding | ann IC50 | ann percentile | legacy IC50 | legacy rank | scores equal | percentiles equal |
|-------|------------|-------|------|----------------|-------------|---------------|----------------|----------|----------------|-------------|-------------|--------------|-------------------|
| 1     | KVFAEAVQID | 968   | 976  | 9              | HLA-A*02:01 | 968           | 81             | 37782.04 | 8.10E+01       | 3.78E+04    | 81          | TRUE         | TRUE              |
| 1     | EDLLFNKVT  | 801   | 809  | 9              | HLA-A*02:01 | 801           | 81             | 37820.48 | 8.10E+01       | 3.78E+04    | 81          | TRUE         | TRUE              |
| 1     | IRAAEIRAS  | 995   | 1003 | 9              | HLA-A*02:01 | 995           | 81             | 37828.68 | 8.10E+01       | 3.78E+04    | 81          | TRUE         | TRUE              |
| 1     | DGKPKTPPA  | 463   | 471  | 9              | HLA-A*02:01 | 463           | 81             | 37845.47 | 8.10E+01       | 3.78E+04    | 81          | TRUE         | TRUE              |
| 1     | SDTLVLTQD  | 49    | 57   | 9              | HLA-A*02:01 | 49            | 81             | 37884.79 | 8.10E+01       | 3.79E+04    | 81          | TRUE         | TRUE              |
| 1     | ACSCGSCCK  | 1229  | 1237 | 9              | HLA-A*02:01 | 1229          | 81             | 37886.03 | 8.10E+01       | 3.79E+04    | 81          | TRUE         | TRUE              |
| 1     | TSPDVLGD   | 1142  | 1150 | 9              | HLA-A*02:01 | 1142          | 81             | 37899.55 | 8.10E+01       | 3.79E+04    | 81          | TRUE         | TRUE              |
| 1     | SCCKFDEDD  | 1234  | 1242 | 9              | HLA-A*02:01 | 1234          | 81             | 37914.31 | 8.10E+01       | 3.79E+04    | 81          | TRUE         | TRUE              |
| 1     | ADSFVVVKGD | 384   | 392  | 9              | HLA-A*02:01 | 384           | 81             | 37934.41 | 8.10E+01       | 3.79E+04    | 81          | TRUE         | TRUE              |
| 1     | INFNGLTGTG | 528   | 536  | 9              | HLA-A*02:01 | 528           | 82             | 38048.69 | 8.20E+01       | 3.80E+04    | 82          | TRUE         | TRUE              |
| 1     | MPVSMAKTS  | 709   | 717  | 9              | HLA-A*02:01 | 709           | 82             | 38075.89 | 8.20E+01       | 3.81E+04    | 82          | TRUE         | TRUE              |
| 1     | NDILSRLLDK | 960   | 968  | 9              | HLA-A*02:01 | 960           | 82             | 38099.37 | 8.20E+01       | 3.81E+04    | 82          | TRUE         | TRUE              |
| 1     | DVSEKSGNF  | 171   | 179  | 9              | HLA-A*02:01 | 171           | 82             | 38114.63 | 8.20E+01       | 3.81E+04    | 82          | TRUE         | TRUE              |
| 1     | KKISNCVAD  | 343   | 351  | 9              | HLA-A*02:01 | 343           | 82             | 38117.93 | 8.20E+01       | 3.81E+04    | 82          | TRUE         | TRUE              |
| 1     | LNAPATVCG  | 504   | 512  | 9              | HLA-A*02:01 | 504           | 82             | 38123.7  | 8.20E+01       | 3.81E+04    | 82          | TRUE         | TRUE              |
| 1     | ADSSIAYSN  | 683   | 691  | 9              | HLA-A*02:01 | 683           | 82             | 38134.84 | 8.20E+01       | 3.81E+04    | 82          | TRUE         | TRUE              |
| 1     | DSFKELDK   | 1128  | 1136 | 9              | HLA-A*02:01 | 1128          | 82             | 38174.06 | 8.20E+01       | 3.82E+04    | 82          | TRUE         | TRUE              |
| 1     | CGSCCKFDE  | 1232  | 1240 | 9              | HLA-A*02:01 | 1232          | 82             | 38289.48 | 8.20E+01       | 3.83E+04    | 82          | TRUE         | TRUE              |
| 1     | LYVYKGYQP  | 194   | 202  | 9              | HLA-A*02:01 | 194           | 83             | 38323.45 | 8.30E+01       | 3.83E+04    | 83          | TRUE         | TRUE              |
| 1     | GNVNYKYRY  | 434   | 442  | 9              | HLA-A*02:01 | 434           | 83             | 38339.22 | 8.30E+01       | 3.83E+04    | 83          | TRUE         | TRUE              |
| 1     | QNPLAELKC  | 280   | 288  | 9              | HLA-A*02:01 | 280           | 83             | 38354.16 | 8.30E+01       | 3.84E+04    | 83          | TRUE         | TRUE              |
| 1     | KRVDFCGKG  | 1020  | 1028 | 9              | HLA-A*02:01 | 1020          | 83             | 38415.62 | 8.30E+01       | 3.84E+04    | 83          | TRUE         | TRUE              |
| 1     | QERNFTTAP  | 1053  | 1061 | 9              | HLA-A*02:01 | 1053          | 83             | 38424.34 | 8.30E+01       | 3.84E+04    | 83          | TRUE         | TRUE              |
| 1     | NTFVSGNCD  | 1101  | 1109 | 9              | HLA-A*02:01 | 1101          | 83             | 38545.93 | 8.30E+01       | 3.85E+04    | 83          | TRUE         | TRUE              |
| 1     | NYTQHTSSM  | 29    | 37   | 9              | HLA-A*02:01 | 29            | 84             | 38610.22 | 8.40E+01       | 3.86E+04    | 84          | TRUE         | TRUE              |
| 1     | NYKYRYLRH  | 437   | 445  | 9              | HLA-A*02:01 | 437           | 84             | 38624.84 | 8.40E+01       | 3.86E+04    | 84          | TRUE         | TRUE              |
| 1     | AWRIYSTGN  | 618   | 626  | 9              | HLA-A*02:01 | 618           | 84             | 38639.46 | 8.40E+01       | 3.86E+04    | 84          | TRUE         | TRUE              |
| 1     | HVTYVPSQE  | 1046  | 1054 | 9              | HLA-A*02:01 | 1046          | 84             | 38644.9  | 8.40E+01       | 3.86E+04    | 84          | TRUE         | TRUE              |
| 1     | LTAFSPAQD  | 235   | 243  | 9              | HLA-A*02:01 | 235           | 84             | 38654.94 | 8.40E+01       | 3.87E+04    | 84          | TRUE         | TRUE              |
| 1     | WERKPSINC  | 340   | 348  | 9              | HLA-A*02:01 | 340           | 84             | 38679.21 | 8.40E+01       | 3.87E+04    | 84          | TRUE         | TRUE              |
| 1     | GNPVPFKD   | 77    | 85   | 9              | HLA-A*02:01 | 77            | 84             | 38710.6  | 8.40E+01       | 3.87E+04    | 84          | TRUE         | TRUE              |
| 1     | LYQDVNCTD  | 597   | 605  | 9              | HLA-A*02:01 | 597           | 84             | 38718.14 | 8.40E+01       | 3.87E+04    | 84          | TRUE         | TRUE              |
| 1     | SPDGKPCPT  | 461   | 469  | 9              | HLA-A*02:01 | 461           | 84             | 38724.01 | 8.40E+01       | 3.87E+04    | 84          | TRUE         | TRUE              |
| 1     | QDRNTRVTF  | 756   | 764  | 9              | HLA-A*02:01 | 756           | 84             | 38725.25 | 8.40E+01       | 3.87E+04    | 84          | TRUE         | TRUE              |
| 1     | NHFTGNPVI  | 73    | 81   | 9              | HLA-A*02:01 | 73            | 84             | 38744.54 | 8.40E+01       | 3.87E+04    | 84          | TRUE         | TRUE              |
| 1     | AAEIRASAN  | 997   | 1005 | 9              | HLA-A*02:01 | 997           | 84             | 38754.61 | 8.40E+01       | 3.88E+04    | 84          | TRUE         | TRUE              |
| 1     | VAVLYQDVN  | 594   | 602  | 9              | HLA-A*02:01 | 594           | 84             | 38756.29 | 8.40E+01       | 3.88E+04    | 84          | TRUE         | TRUE              |
| 1     | NPVVPFKDG  | 78    | 86   | 9              | HLA-A*02:01 | 78            | 84             | 38761.31 | 8.40E+01       | 3.88E+04    | 84          | TRUE         | TRUE              |
| 1     | SRLDKVEAE  | 964   | 972  | 9              | HLA-A*02:01 | 964           | 84             | 38777.26 | 8.40E+01       | 3.88E+04    | 84          | TRUE         | TRUE              |
| 1     | VCGPKLSTD  | 510   | 518  | 9              | HLA-A*02:01 | 510           | 84             | 38796.97 | 8.40E+01       | 3.88E+04    | 84          | TRUE         | TRUE              |
| 1     | KFDEDDSEP  | 1237  | 1245 | 9              | HLA-A*02:01 | 1237          | 84             | 38805.8  | 8.40E+01       | 3.88E+04    | 84          | TRUE         | TRUE              |
| 1     | STALGKLQD  | 924   | 932  | 9              | HLA-A*02:01 | 924           | 84             | 38810.84 | 8.40E+01       | 3.88E+04    | 84          | TRUE         | TRUE              |
| 1     | AYTMSIGAD  | 676   | 684  | 9              | HLA-A*02:01 | 676           | 84             | 38812.52 | 8.40E+01       | 3.88E+04    | 84          | TRUE         | TRUE              |
| 1     | TSTALGKLQ  | 923   | 931  | 9              | HLA-A*02:01 | 923           | 84             | 38823.03 | 8.40E+01       | 3.88E+04    | 84          | TRUE         | TRUE              |
| 1     | ATEKSNVVR  | 91    | 99   | 9              | HLA-A*02:01 | 91            | 84             | 38828.49 | 8.40E+01       | 3.88E+04    | 84          | TRUE         | TRUE              |
| 1     | VSEKSGNFK  | 172   | 180  | 9              | HLA-A*02:01 | 172           | 84             | 38843.19 | 8.40E+01       | 3.88E+04    | 84          | TRUE         | TRUE              |
| 1     | RCTTFDDVQ  | 18    | 26   | 9              | HLA-A*02:01 | 18            | 84             | 38852.43 | 8.40E+01       | 3.89E+04    | 84          | TRUE         | TRUE              |
| 1     | VVKGDDVRQ  | 388   | 396  | 9              | HLA-A*02:01 | 388           | 84             | 38863.79 | 8.40E+01       | 3.89E+04    | 84          | TRUE         | TRUE              |
| 1     | LKPTKRSFI  | 792   | 800  | 9              | HLA-A*02:01 | 792           | 85             | 38900.8  | 8.50E+01       | 3.89E+04    | 85          | TRUE         | TRUE              |
| 1     | YDPLPELDD  | 1120  | 1128 | 9              | HLA-A*02:01 | 1120          | 85             | 38947.56 | 8.50E+01       | 3.89E+04    | 85          | TRUE         | TRUE              |
| 1     | DCSQNPLAE  | 277   | 285  | 9              | HLA-A*02:01 | 277           | 85             | 38994.79 | 8.50E+01       | 3.90E+04    | 85          | TRUE         | TRUE              |
| 1     | TGVLVTPSSK | 535   | 543  | 9              | HLA-A*02:01 | 535           | 85             | 38994.79 | 8.50E+01       | 3.90E+04    | 85          | TRUE         | TRUE              |
| 1     | LDKVEAEVQ  | 966   | 974  | 9              | HLA-A*02:01 | 966           | 85             | 39019.69 | 8.50E+01       | 3.90E+04    | 85          | TRUE         | TRUE              |
| 1     | KEELDKYFK  | 1131  | 1139 | 9              | HLA-A*02:01 | 1131          | 85             | 39045.02 | 8.50E+01       | 3.90E+04    | 85          | TRUE         | TRUE              |
| 1     | HTSSMRGVY  | 33    | 41   | 9              | HLA-A*02:01 | 33            | 85             | 39053.48 | 8.50E+01       | 3.91E+04    | 85          | TRUE         | TRUE              |
| 1     | LDRCCTFDD  | 16    | 24   | 9              | HLA-A*02:01 | 16            | 85             | 39054.73 | 8.50E+01       | 3.91E+04    | 85          | TRUE         | TRUE              |
| 1     | VRQIAPGQT  | 394   | 402  | 9              | HLA-A*02:01 | 394           | 85             | 39099.54 | 8.50E+01       | 3.91E+04    | 85          | TRUE         | TRUE              |
| 1     | NVTGFTHTN  | 65    | 73   | 9              | HLA-A*02:01 | 65            | 85             | 39132.14 | 8.50E+01       | 3.91E+04    | 85          | TRUE         | TRUE              |
| 1     | IMKQYGECLG | 816   | 824  | 9              | HLA-A*02:01 | 816           | 86             | 39183.83 | 8.60E+01       | 3.92E+04    | 86          | TRUE         | TRUE              |
| 1     | LPDPLPKTK  | 788   | 796  | 9              | HLA-A*02:01 | 788           | 86             | 39216.92 | 8.60E+01       | 3.92E+04    | 86          | TRUE         | TRUE              |
| 1     | NCTFEYISD  | 158   | 166  | 9              | HLA-A*02:01 | 158           | 86             | 39218.62 | 8.60E+01       | 3.92E+04    | 86          | TRUE         | TRUE              |
| 1     | NPLAELKCS  | 281   | 289  | 9              | HLA-A*02:01 | 281           | 86             | 39244.93 | 8.60E+01       | 3.92E+04    | 86          | TRUE         | TRUE              |
| 1     | GDDVRQIAP  | 391   | 399  | 9              | HLA-A*02:01 | 391           | 86             | 39282.3  | 8.60E+01       | 3.93E+04    | 86          | TRUE         | TRUE              |
| 1     | YDENGITTD  | 266   | 274  | 9              | HLA-A*02:01 | 266           | 86             | 39298.04 | 8.60E+01       | 3.93E+04    | 86          | TRUE         | TRUE              |
| 1     | DEDDSEPV   | 1239  | 1247 | 9              | HLA-A*02:01 | 1239          | 86             | 39362.72 | 8.60E+01       | 3.94E+04    | 86          | TRUE         | TRUE              |
| 1     | SGSDLDRC   | 12    | 20   | 9              | HLA-A*02:01 | 12            | 86             | 39362.72 | 8.60E+01       | 3.94E+04    | 86          | TRUE         | TRUE              |
| 1     | SGTATAGWT  | 861   | 869  | 9              | HLA-A*02:01 | 861           | 86             | 39380.62 | 8.60E+01       | 3.94E+04    | 86          | TRUE         | TRUE              |
| 1     | DRNTREVEA  | 757   | 765  | 9              | HLA-A*02:01 | 757           | 87             | 39509.08 | 8.70E+01       | 3.95E+04    | 87          | TRUE         | TRUE              |
| 1     | GWVFGSTMN  | 100   | 108  | 9              | HLA-A*02:01 | 100           | 87             | 39513.36 | 8.70E+01       | 3.95E+04    | 87          | TRUE         | TRUE              |
| 1     | INVVPSPDGK | 457   | 465  | 9              | HLA-A*02:01 | 457           | 87             | 39529.6  | 8.70E+01       | 3.95E+04    | 87          | TRUE         | TRUE              |
| 1     | AEHVDTSYE  | 639   | 647  | 9              | HLA-A*02:01 | 639           | 87             | 39550.99 | 8.70E+01       | 3.96E+04    | 87          | TRUE         | TRUE              |
| 1     | TDNTFVSGN  | 1099  | 1107 | 9              | HLA-A*02:01 | 1099          | 87             | 39556.99 | 8.70E+01       | 3.96E+04    | 87          | TRUE         | TRUE              |
| 1     | IDATSTGNY  | 428   | 436  | 9              | HLA-A*02:01 | 428           | 87             | 39580.54 | 8.70E+01       | 3.96E+04    | 87          | TRUE         | TRUE              |
| 1     | ONAFNCTFE  | 154   | 162  | 9              | HLA-A*02:01 | 154           | 87             | 39602.37 | 8.70E+01       | 3.96E+04    | 87          | TRUE         | TRUE              |
| 1     | PAQDIWGT   | 240   | 248  | 9              | HLA-A*02:01 | 240           | 87             | 39609.68 | 8.70E+01       | 3.96E+04    | 87          | TRUE         | TRUE              |
| 1     | NNTIAIPTN  | 691   | 699  | 9              | HLA-A*02:01 | 691           | 87             | 39615.25 | 8.70E+01       | 3.96E+04    | 87          | TRUE         | TRUE              |
| 1     | PCTPPALNC  | 466   | 474  | 9              | HLA-A*02:01 | 466           | 87             | 39667.99 | 8.70E+01       | 3.97E+04    | 87          | TRUE         | TRUE              |
| 1     | PVLKGVKLH  | 1245  | 1253 | 9              | HLA-A*02:01 | 1245          | 87             | 39673.57 | 8.70E+01       | 3.97E+04    | 87          | TRUE         | TRUE              |
| 1     | DDSEPV     | 1241  | 1249 | 9              | HLA-A*02:01 | 1241          | 87             | 39693.76 | 8.70E+01       | 3.97E+04    | 87          | TRUE         | TRUE              |
| 1     | VNIQKEIDR  | 1159  | 1167 | 9              | HLA-A*02:01 | 1159          | 87             | 39707.94 | 8.70E+01       | 3.97E+04    | 87          | TRUE         | TRUE              |
| 1     | QVQGMKYTP  | 766   | 774  | 9              | HLA-A*02:01 | 766           | 87             | 39719.54 | 8.70E+01       | 3.97E+04    | 87          | TRUE         | TRUE              |
| 1     | QPELDSFKE  | 1124  | 1132 | 9              | HLA-A*02:01 | 1124          | 87             | 39732.43 | 8.70E+01       | 3.97E+04    | 87          | TRUE         | TRUE              |
| 1     | GFMMQYGE   | 814   | 822  | 9              | HLA-A*02:01 | 814           | 87             | 39736.73 | 8.70E+01       | 3.97E+04    | 87          | TRUE         | TRUE              |
| 1     | SFPOAAHPG  | 1033  | 1041 | 9              | HLA-A*02:01 | 1033          | 87             | 39736.73 | 8.70E+01       | 3.97E+04    | 87          | TRUE         | TRUE              |
| 1     | PTTFMLKYD  | 259   | 267  | 9              | HLA-A*02:01 | 259           | 87             | 39744.89 | 8.70E+01       | 3.97E+04    | 87          | TRUE         | TRUE              |
| 1     | VLGSKRVD   | 1015  | 1023 | 9              | HLA-A*02:01 | 1015          | 88             | 39768.55 | 8.80E+01       | 3.98E+04    | 88          | TRUE         | TRUE              |
| 1     | SNVPSPDG   | 456   | 464  | 9              | HLA-A*02:01 | 456           | 88             | 39779.32 | 8.80E+01       | 3.98E+04    | 88          | TRUE         | TRUE              |
| 1     | FGSTMNKS   | 103   | 111  | 9              | HLA-A*02:01 | 103           | 88             | 39781.04 | 8.80E+01       | 3.98E+04    | 88          | TRUE         | TRUE              |
| 1     | GSCCKFDED  | 1233  | 1241 | 9              | HLA-A*02:01 | 1233          | 88             | 39782.32 | 8.80E+01       | 3.98E+04    | 88          | TRUE         | TRUE              |
| 1     | VKSFEIDKG  | 290   | 298  | 9              | HLA-A*02:01 | 290           | 88             | 39790.07 | 8.80E+01       | 3.98E+04    | 88          | TRUE         | TRUE              |
| 1     | SSKRFQPFQ  | 541   | 549  | 9              | HLA-A*02:01 | 541           | 88             | 39802.98 | 8.80E+01       | 3.98E+04    | 88          | TRUE         | TRUE              |
| 1     | SGINASVVN  | 1152  | 1160 | 9              | HLA-A*02:01 | 1152          | 88             | 39814.61 | 8.80E+01       | 3.98E+04    | 88          | TRUE         | TRUE              |
| 1     | EDDSEPV    | 1240  | 1248 | 9              | HLA-A*02:01 | 1240          | 88             | 39851.25 | 8.80E+01       | 3.99E+04    | 88          | TRUE         | TRUE              |
| 1     | ADVNYKLPD  | 406   | 414  | 9              | HLA-A*02:01 | 406           |                |          |                |             |             |              |                   |

| seq # | peptide    | start | end  | peptide length | allele      | peptide index | median binding | ann IC50 | ann percentile | legacy IC50 | legacy rank | scores equal | percentiles equal |
|-------|------------|-------|------|----------------|-------------|---------------|----------------|----------|----------------|-------------|-------------|--------------|-------------------|
| 1     | DVQAPNITYQ | 24    | 32   | 9              | HLA-A*02:01 | 24            | 88             | 40000.72 | 8.80E+01       | 4.00E+04    | 88          | TRUE         | TRUE              |
| 1     | KPCTPPALN  | 465   | 473  | 9              | HLA-A*02:01 | 465           | 88             | 40014.13 | 8.80E+01       | 4.00E+04    | 88          | TRUE         | TRUE              |
| 1     | TFMLKYVDEN | 261   | 269  | 9              | HLA-A*02:01 | 261           | 88             | 40041.86 | 8.80E+01       | 4.00E+04    | 88          | TRUE         | TRUE              |
| 1     | DVSTAIHAD  | 605   | 613  | 9              | HLA-A*02:01 | 605           | 89             | 40090.41 | 8.90E+01       | 4.01E+04    | 89          | TRUE         | TRUE              |
| 1     | ANLAATKMS  | 1004  | 1012 | 9              | HLA-A*02:01 | 1004          | 89             | 40136.84 | 8.90E+01       | 4.01E+04    | 89          | TRUE         | TRUE              |
| 1     | REVFAQVKQ  | 761   | 769  | 9              | HLA-A*02:01 | 761           | 89             | 40139.9  | 8.90E+01       | 4.01E+04    | 89          | TRUE         | TRUE              |
| 1     | TGIGYQPYR  | 487   | 495  | 9              | HLA-A*02:01 | 487           | 89             | 40161.18 | 8.90E+01       | 4.02E+04    | 89          | TRUE         | TRUE              |
| 1     | TEKSNVVRG  | 92    | 100  | 9              | HLA-A*02:01 | 92            | 89             | 40182.92 | 8.90E+01       | 4.02E+04    | 89          | TRUE         | TRUE              |
| 1     | GRDVSDFD   | 552   | 560  | 9              | HLA-A*02:01 | 552           | 89             | 40193.78 | 8.90E+01       | 4.02E+04    | 89          | TRUE         | TRUE              |
| 1     | MAKTSVDCN  | 713   | 721  | 9              | HLA-A*02:01 | 713           | 89             | 40194.22 | 8.90E+01       | 4.02E+04    | 89          | TRUE         | TRUE              |
| 1     | EGKAYFPRE  | 1066  | 1074 | 9              | HLA-A*02:01 | 1066          | 89             | 40195.52 | 8.90E+01       | 4.02E+04    | 89          | TRUE         | TRUE              |
| 1     | SGNFKHLRE  | 176   | 184  | 9              | HLA-A*02:01 | 176           | 89             | 40201.17 | 8.90E+01       | 4.02E+04    | 89          | TRUE         | TRUE              |
| 1     | MYICGDSTE  | 722   | 730  | 9              | HLA-A*02:01 | 722           | 89             | 40210.32 | 8.90E+01       | 4.02E+04    | 89          | TRUE         | TRUE              |
| 1     | KYRRLRHGK  | 439   | 447  | 9              | HLA-A*02:01 | 439           | 89             | 40214.24 | 8.90E+01       | 4.02E+04    | 89          | TRUE         | TRUE              |
| 1     | VRDLPSGFN  | 206   | 214  | 9              | HLA-A*02:01 | 206           | 89             | 40238.16 | 8.90E+01       | 4.02E+04    | 89          | TRUE         | TRUE              |
| 1     | WNTRNIDAT  | 423   | 431  | 9              | HLA-A*02:01 | 423           | 89             | 40249.06 | 8.90E+01       | 4.02E+04    | 89          | TRUE         | TRUE              |
| 1     | QNVLYENQK  | 895   | 903  | 9              | HLA-A*02:01 | 895           | 89             | 40252.09 | 8.90E+01       | 4.03E+04    | 89          | TRUE         | TRUE              |
| 1     | LGKLQDVVN  | 927   | 935  | 9              | HLA-A*02:01 | 927           | 89             | 40330.12 | 8.90E+01       | 4.03E+04    | 89          | TRUE         | TRUE              |
| 1     | SKPMGTQTH  | 141   | 149  | 9              | HLA-A*02:01 | 141           | 89             | 40337.56 | 8.90E+01       | 4.03E+04    | 89          | TRUE         | TRUE              |
| 1     | HVDTSYECD  | 641   | 649  | 9              | HLA-A*02:01 | 641           | 89             | 40344.98 | 8.90E+01       | 4.03E+04    | 89          | TRUE         | TRUE              |
| 1     | LKCSVKSFE  | 286   | 294  | 9              | HLA-A*02:01 | 286           | 89             | 40361.14 | 8.90E+01       | 4.04E+04    | 89          | TRUE         | TRUE              |
| 1     | PKLSTDULK  | 513   | 521  | 9              | HLA-A*02:01 | 513           | 90             | 40408.3  | 9.00E+01       | 4.04E+04    | 90          | TRUE         | TRUE              |
| 1     | TSTGNNYNYK | 431   | 439  | 9              | HLA-A*02:01 | 431           | 90             | 40422.3  | 9.00E+01       | 4.04E+04    | 90          | TRUE         | TRUE              |
| 1     | TYVTQQLR   | 988   | 996  | 9              | HLA-A*02:01 | 988           | 90             | 40441.99 | 9.00E+01       | 4.04E+04    | 90          | TRUE         | TRUE              |
| 1     | YGVSATKLN  | 367   | 375  | 9              | HLA-A*02:01 | 367           | 90             | 40452.95 | 9.00E+01       | 4.05E+04    | 90          | TRUE         | TRUE              |
| 1     | VDFCGKGYH  | 1022  | 1030 | 9              | HLA-A*02:01 | 1022          | 90             | 40454.69 | 9.00E+01       | 4.05E+04    | 90          | TRUE         | TRUE              |
| 1     | PSVYAWERK  | 335   | 343  | 9              | HLA-A*02:01 | 335           | 90             | 40462.57 | 9.00E+01       | 4.05E+04    | 90          | TRUE         | TRUE              |
| 1     | DVVRLDPSG  | 204   | 212  | 9              | HLA-A*02:01 | 204           | 90             | 40510.75 | 9.00E+01       | 4.05E+04    | 90          | TRUE         | TRUE              |
| 1     | SDFTSVDRD  | 556   | 564  | 9              | HLA-A*02:01 | 556           | 90             | 40603.78 | 9.00E+01       | 4.06E+04    | 90          | TRUE         | TRUE              |
| 1     | KNLNESLID  | 1173  | 1181 | 9              | HLA-A*02:01 | 1173          | 90             | 40606.43 | 9.00E+01       | 4.06E+04    | 90          | TRUE         | TRUE              |
| 1     | LRSTSQKSI  | 666   | 674  | 9              | HLA-A*02:01 | 666           | 90             | 40674.57 | 9.00E+01       | 4.07E+04    | 90          | TRUE         | TRUE              |
| 1     | TNNVIRACN  | 121   | 129  | 9              | HLA-A*02:01 | 121           | 91             | 40770.19 | 9.10E+01       | 4.08E+04    | 91          | TRUE         | TRUE              |
| 1     | DYGFYTTTG  | 480   | 488  | 9              | HLA-A*02:01 | 480           | 91             | 40790.5  | 9.10E+01       | 4.08E+04    | 91          | TRUE         | TRUE              |
| 1     | QPFOQGRD   | 546   | 554  | 9              | HLA-A*02:01 | 546           | 91             | 40844.8  | 9.10E+01       | 4.08E+04    | 91          | TRUE         | TRUE              |
| 1     | PGQTGVIAV  | 399   | 407  | 9              | HLA-A*02:01 | 399           | 91             | 40853.65 | 9.10E+01       | 4.09E+04    | 91          | TRUE         | TRUE              |
| 1     | TGNNYKYR   | 433   | 441  | 9              | HLA-A*02:01 | 433           | 91             | 40874.42 | 9.10E+01       | 4.09E+04    | 91          | TRUE         | TRUE              |
| 1     | DPLQPELDS  | 1121  | 1129 | 9              | HLA-A*02:01 | 1121          | 91             | 40914.69 | 9.10E+01       | 4.09E+04    | 91          | TRUE         | TRUE              |
| 1     | DSFVVKGDD  | 385   | 393  | 9              | HLA-A*02:01 | 385           | 91             | 40916.46 | 9.10E+01       | 4.09E+04    | 91          | TRUE         | TRUE              |
| 1     | GVLTSSKR   | 536   | 544  | 9              | HLA-A*02:01 | 536           | 91             | 40964.3  | 9.10E+01       | 4.10E+04    | 91          | TRUE         | TRUE              |
| 1     | RDVSDFTDS  | 553   | 561  | 9              | HLA-A*02:01 | 553           | 91             | 40982.93 | 9.10E+01       | 4.10E+04    | 91          | TRUE         | TRUE              |
| 1     | DNTFVSGNC  | 1100  | 1108 | 9              | HLA-A*02:01 | 1100          | 91             | 40989.56 | 9.10E+01       | 4.10E+04    | 91          | TRUE         | TRUE              |
| 1     | LDKYFKNHT  | 1134  | 1142 | 9              | HLA-A*02:01 | 1134          | 92             | 41068.6  | 9.20E+01       | 4.11E+04    | 92          | TRUE         | TRUE              |
| 1     | ENQKQIANQ  | 900   | 908  | 9              | HLA-A*02:01 | 900           | 92             | 41078.38 | 9.20E+01       | 4.11E+04    | 92          | TRUE         | TRUE              |
| 1     | PSGFNTLKP  | 210   | 218  | 9              | HLA-A*02:01 | 210           | 92             | 41085.48 | 9.20E+01       | 4.11E+04    | 92          | TRUE         | TRUE              |
| 1     | GKAYFPREG  | 1067  | 1075 | 9              | HLA-A*02:01 | 1067          | 92             | 41086.38 | 9.20E+01       | 4.11E+04    | 92          | TRUE         | TRUE              |
| 1     | KYFKNHTSP  | 1136  | 1144 | 9              | HLA-A*02:01 | 1136          | 92             | 41172.26 | 9.20E+01       | 4.12E+04    | 92          | TRUE         | TRUE              |
| 1     | EHVDTSYEC  | 640   | 648  | 9              | HLA-A*02:01 | 640           | 92             | 41210.14 | 9.20E+01       | 4.12E+04    | 92          | TRUE         | TRUE              |
| 1     | QKEIDRLNE  | 1162  | 1170 | 9              | HLA-A*02:01 | 1162          | 92             | 41357.99 | 9.20E+01       | 4.14E+04    | 92          | TRUE         | TRUE              |
| 1     | KPTKRSFIE  | 793   | 801  | 9              | HLA-A*02:01 | 793           | 93             | 41390.22 | 9.30E+01       | 4.14E+04    | 93          | TRUE         | TRUE              |
| 1     | DAVDCSQNP  | 274   | 282  | 9              | HLA-A*02:01 | 274           | 93             | 41421.14 | 9.30E+01       | 4.14E+04    | 93          | TRUE         | TRUE              |
| 1     | DDVQAPNYT  | 23    | 31   | 9              | HLA-A*02:01 | 23            | 93             | 41454.76 | 9.30E+01       | 4.15E+04    | 93          | TRUE         | TRUE              |
| 1     | NKAIJSQIE  | 910   | 918  | 9              | HLA-A*02:01 | 910           | 93             | 41485.28 | 9.30E+01       | 4.15E+04    | 93          | TRUE         | TRUE              |
| 1     | VYAWERKKI  | 337   | 345  | 9              | HLA-A*02:01 | 337           | 93             | 41556.26 | 9.30E+01       | 4.16E+04    | 93          | TRUE         | TRUE              |
| 1     | VVNIQKIED  | 1158  | 1166 | 9              | HLA-A*02:01 | 1158          | 93             | 41595.84 | 9.30E+01       | 4.16E+04    | 93          | TRUE         | TRUE              |
| 1     | CKFDEDDSE  | 1236  | 1244 | 9              | HLA-A*02:01 | 1236          | 93             | 41626    | 9.30E+01       | 4.16E+04    | 93          | TRUE         | TRUE              |
| 1     | QDVNCTDVS  | 599   | 607  | 9              | HLA-A*02:01 | 599           | 93             | 41627.37 | 9.30E+01       | 4.16E+04    | 93          | TRUE         | TRUE              |
| 1     | SEPLVKGVK  | 1243  | 1251 | 9              | HLA-A*02:01 | 1243          | 93             | 41635.02 | 9.30E+01       | 4.16E+04    | 93          | TRUE         | TRUE              |
| 1     | RNIDATSTG  | 426   | 434  | 9              | HLA-A*02:01 | 426           | 93             | 41642.68 | 9.30E+01       | 4.16E+04    | 93          | TRUE         | TRUE              |
| 1     | VSMAKTSVD  | 711   | 719  | 9              | HLA-A*02:01 | 711           | 93             | 41690.02 | 9.30E+01       | 4.17E+04    | 93          | TRUE         | TRUE              |
| 1     | AAEQDRNTR  | 753   | 761  | 9              | HLA-A*02:01 | 753           | 93             | 41711.67 | 9.30E+01       | 4.17E+04    | 93          | TRUE         | TRUE              |
| 1     | VPSQERNFT  | 1050  | 1058 | 9              | HLA-A*02:01 | 1050          | 93             | 41725.66 | 9.30E+01       | 4.17E+04    | 93          | TRUE         | TRUE              |
| 1     | DAGFMKOYG  | 812   | 820  | 9              | HLA-A*02:01 | 812           | 94             | 41792.53 | 9.40E+01       | 4.18E+04    | 94          | TRUE         | TRUE              |
| 1     | NEVAKNLNE  | 1169  | 1177 | 9              | HLA-A*02:01 | 1169          | 94             | 41858.59 | 9.40E+01       | 4.19E+04    | 94          | TRUE         | TRUE              |
| 1     | PGTNASSEV  | 586   | 594  | 9              | HLA-A*02:01 | 586           | 94             | 41899.83 | 9.40E+01       | 4.19E+04    | 94          | TRUE         | TRUE              |
| 1     | LYENQKQIA  | 898   | 906  | 9              | HLA-A*02:01 | 898           | 94             | 41927.51 | 9.40E+01       | 4.19E+04    | 94          | TRUE         | TRUE              |
| 1     | APNYTQHTS  | 27    | 35   | 9              | HLA-A*02:01 | 27            | 94             | 41937.92 | 9.40E+01       | 4.19E+04    | 94          | TRUE         | TRUE              |
| 1     | PTKRSFIED  | 794   | 802  | 9              | HLA-A*02:01 | 794           | 94             | 41965.17 | 9.40E+01       | 4.20E+04    | 94          | TRUE         | TRUE              |
| 1     | NVLYENQKQ  | 896   | 904  | 9              | HLA-A*02:01 | 896           | 94             | 41995.6  | 9.40E+01       | 4.20E+04    | 94          | TRUE         | TRUE              |
| 1     | NNTVYDPLQ  | 1116  | 1124 | 9              | HLA-A*02:01 | 1116          | 94             | 42034.7  | 9.40E+01       | 4.20E+04    | 94          | TRUE         | TRUE              |
| 1     | YFAATEKSN  | 88    | 96   | 9              | HLA-A*02:01 | 88            | 94             | 42045.16 | 9.40E+01       | 4.20E+04    | 94          | TRUE         | TRUE              |
| 1     | INGTITDAVD | 269   | 277  | 9              | HLA-A*02:01 | 269           | 94             | 42077.01 | 9.40E+01       | 4.21E+04    | 94          | TRUE         | TRUE              |
| 1     | QKQJANQFN  | 902   | 910  | 9              | HLA-A*02:01 | 902           | 95             | 42122.57 | 9.50E+01       | 4.21E+04    | 95          | TRUE         | TRUE              |
| 1     | DDVRQIAPG  | 392   | 400  | 9              | HLA-A*02:01 | 392           | 95             | 42151.29 | 9.50E+01       | 4.22E+04    | 95          | TRUE         | TRUE              |
| 1     | PDGKPCPTQ  | 462   | 470  | 9              | HLA-A*02:01 | 462           | 95             | 42198.75 | 9.50E+01       | 4.22E+04    | 95          | TRUE         | TRUE              |
| 1     | NNVFQQTQAG | 626   | 634  | 9              | HLA-A*02:01 | 626           | 95             | 42210.62 | 9.50E+01       | 4.22E+04    | 95          | TRUE         | TRUE              |
| 1     | ANQFNKAIS  | 906   | 914  | 9              | HLA-A*02:01 | 906           | 95             | 42237.58 | 9.50E+01       | 4.22E+04    | 95          | TRUE         | TRUE              |
| 1     | RHGKLRPFE  | 444   | 452  | 9              | HLA-A*02:01 | 444           | 95             | 42239.87 | 9.50E+01       | 4.22E+04    | 95          | TRUE         | TRUE              |
| 1     | SVRDPKTSE  | 561   | 569  | 9              | HLA-A*02:01 | 561           | 95             | 42281.92 | 9.50E+01       | 4.23E+04    | 95          | TRUE         | TRUE              |
| 1     | LGKYEYQIK  | 1185  | 1193 | 9              | HLA-A*02:01 | 1185          | 95             | 42340.53 | 9.50E+01       | 4.23E+04    | 95          | TRUE         | TRUE              |
| 1     | RYLRHGLKL  | 441   | 449  | 9              | HLA-A*02:01 | 441           | 95             | 42373.53 | 9.50E+01       | 4.24E+04    | 95          | TRUE         | TRUE              |
| 1     | CKFKDEDD   | 1235  | 1243 | 9              | HLA-A*02:01 | 1235          | 95             | 42377.66 | 9.50E+01       | 4.24E+04    | 95          | TRUE         | TRUE              |
| 1     | SEKSGNFKH  | 173   | 181  | 9              | HLA-A*02:01 | 173           | 95             | 42420.78 | 9.50E+01       | 4.24E+04    | 95          | TRUE         | TRUE              |
| 1     | SGIAAEQDR  | 750   | 758  | 9              | HLA-A*02:01 | 750           | 95             | 42452.91 | 9.50E+01       | 4.25E+04    | 95          | TRUE         | TRUE              |
| 1     | VPFSPDGPK  | 458   | 466  | 9              | HLA-A*02:01 | 458           | 95             | 42477.72 | 9.50E+01       | 4.25E+04    | 95          | TRUE         | TRUE              |
| 1     | DSSIAYSNN  | 684   | 692  | 9              | HLA-A*02:01 | 684           | 96             | 42545.33 | 9.60E+01       | 4.25E+04    | 96          | TRUE         | TRUE              |
| 1     | LDSFKEELD  | 1127  | 1135 | 9              | HLA-A*02:01 | 1127          | 96             | 42578.05 | 9.60E+01       | 4.26E+04    | 96          | TRUE         | TRUE              |
| 1     | LTPSSKRFQ  | 538   | 546  | 9              | HLA-A*02:01 | 538           | 96             | 42578.95 | 9.60E+01       | 4.26E+04    | 96          | TRUE         | TRUE              |
| 1     | GKLRPFERO  | 446   | 454  | 9              | HLA-A*02:01 | 446           | 96             | 42617.22 | 9.60E+01       | 4.26E+04    | 96          | TRUE         | TRUE              |
| 1     | DKYFKNHTS  | 1135  | 1143 | 9              | HLA-A*02:01 | 1135          | 96             | 42652.28 | 9.60E+01       | 4.27E+04    | 96          | TRUE         | TRUE              |
| 1     | GIAAEQDRN  | 751   | 759  | 9              | HLA-A*02:01 | 751           | 96             | 42900.81 | 9.60E+01       | 4.29E+04    | 96          | TRUE         | TRUE              |
| 1     | TPSSKRFQP  | 539   | 547  | 9              | HLA-A*02:01 | 539           | 96             | 42904.07 | 9.60E+01       | 4.29E+04    | 96          | TRUE         | TRUE              |
| 1     | LNEVAKNLN  | 1168  | 1176 | 9              | HLA-A*02:01 | 1168          | 96             | 42959.8  | 9.60E+01       | 4.30E+04    | 96          | TRUE         | TRUE              |
| 1     | PDEIFRSOT  | 43    | 51   | 9              | HLA-A*02:01 | 43            | 97             | 43030.04 | 9.70E+01       | 4.30E+04    | 97          | TRUE         | TRUE              |
| 1     | DFTDSVRDP  | 557   | 565  | 9              | HLA-A*02:   |               |                |          |                |             |             |              |                   |

| seq # | peptide   | start | end  | peptide length | allele      | peptide index | median binding | ann IC50 | ann percentile | legacy IC50 | legacy rank | scores equal | percentiles equal |
|-------|-----------|-------|------|----------------|-------------|---------------|----------------|----------|----------------|-------------|-------------|--------------|-------------------|
| 1     | EELDKYFKN | 1132  | 1140 | 9              | HLA-A*02:01 | 1132          | 98             | 43467.57 | 98             | 43467.57    | 98          | TRUE         | TRUE              |
| 1     | QDVVNQNAQ | 931   | 939  | 9              | HLA-A*02:01 | 931           | 98             | 43558.91 | 98             | 43558.91    | 98          | TRUE         | TRUE              |
| 1     | PELDSFKKE | 1125  | 1133 | 9              | HLA-A*02:01 | 1125          | 98             | 43608.41 | 98             | 43608.41    | 98          | TRUE         | TRUE              |
| 1     | DVNYKLPDD | 407   | 415  | 9              | HLA-A*02:01 | 407           | 98             | 43630.61 | 98             | 43630.61    | 98          | TRUE         | TRUE              |
| 1     | AWERKKISN | 339   | 347  | 9              | HLA-A*02:01 | 339           | 98             | 43798.97 | 98             | 43798.97    | 98          | TRUE         | TRUE              |
| 1     | LRPFERDIS | 448   | 456  | 9              | HLA-A*02:01 | 448           | 98             | 43836.44 | 98             | 43836.44    | 98          | TRUE         | TRUE              |
| 1     | GSTMNNKSQ | 104   | 112  | 9              | HLA-A*02:01 | 104           | 98             | 43840.71 | 98             | 43840.71    | 98          | TRUE         | TRUE              |
| 1     | TDSVRDPKT | 559   | 567  | 9              | HLA-A*02:01 | 559           | 98             | 43854    | 98             | 43854       | 98          | TRUE         | TRUE              |
| 1     | WRIYSTGNN | 619   | 627  | 9              | HLA-A*02:01 | 619           | 98             | 43914.28 | 98             | 43914.28    | 98          | TRUE         | TRUE              |
| 1     | DRLNEVAKN | 1166  | 1174 | 9              | HLA-A*02:01 | 1166          | 98             | 44014.65 | 98             | 44014.65    | 98          | TRUE         | TRUE              |
| 1     | PFSPDGKPC | 459   | 467  | 9              | HLA-A*02:01 | 459           | 99             | 44025.61 | 99             | 44025.61    | 99          | TRUE         | TRUE              |
| 1     | TPGTNASSE | 585   | 593  | 9              | HLA-A*02:01 | 585           | 99             | 44042.28 | 99             | 44042.28    | 99          | TRUE         | TRUE              |
| 1     | PDVDLGDIS | 1144  | 1152 | 9              | HLA-A*02:01 | 1144          | 99             | 44249.11 | 99             | 44249.11    | 99          | TRUE         | TRUE              |
| 1     | KNHTSPDVD | 1139  | 1147 | 9              | HLA-A*02:01 | 1139          | 99             | 44272.57 | 99             | 44272.57    | 99          | TRUE         | TRUE              |
| 1     | AEQDRNTRE | 754   | 762  | 9              | HLA-A*02:01 | 754           | 99             | 44452.1  | 99             | 44452.1     | 99          | TRUE         | TRUE              |
| 1     | DSVRDPKTS | 560   | 568  | 9              | HLA-A*02:01 | 560           | 99             | 44596.13 | 99             | 44596.13    | 99          | TRUE         | TRUE              |
| 1     | EFVFNKNDG | 184   | 192  | 9              | HLA-A*02:01 | 184           | 100            | 44753.7  | 100            | 44753.7     | 100         | TRUE         | TRUE              |
| 1     | TYVPSQERN | 1048  | 1056 | 9              | HLA-A*02:01 | 1048          | 100            | 44953.18 | 100            | 44953.18    | 100         | TRUE         | TRUE              |
| 1     | DKGIYQTSN | 296   | 304  | 9              | HLA-A*02:01 | 296           | 100            | 45031.55 | 100            | 45031.55    | 100         | TRUE         | TRUE              |
| 1     | VYKGYQPID | 196   | 204  | 9              | HLA-A*02:01 | 196           | 100            | 45094.44 | 100            | 45094.44    | 100         | TRUE         | TRUE              |
| 1     | DPLKPTKRS | 790   | 798  | 9              | HLA-A*02:01 | 790           | 100            | 45117.39 | 100            | 45117.39    | 100         | TRUE         | TRUE              |
| 1     | PNYQHTSS  | 28    | 36   | 9              | HLA-A*02:01 | 28            | 100            | 45424.99 | 100            | 45424.99    | 100         | TRUE         | TRUE              |
| 1     | LDVSEKSGN | 170   | 178  | 9              | HLA-A*02:01 | 170           | 100            | 45758.45 | 100            | 45758.45    | 100         | TRUE         | TRUE              |

| seq # | peptide    | start | end  | peptide length | allele      | peptide index | median binding | smmpmbec IC50 | smmpmbec p | legacy IC50 | legacy rank | scores equal | percentiles equal |
|-------|------------|-------|------|----------------|-------------|---------------|----------------|---------------|------------|-------------|-------------|--------------|-------------------|
| 1     | FIAGLAI    | 1202  | 1210 | 9              | HLA-A*02:01 | 1202          | 0.4            | 20.53194064   | 0.4        | 20.53194064 | 0.4         | TRUE         | TRUE              |
| 1     | RLQSLQTYV  | 982   | 990  | 9              | HLA-A*02:01 | 982           | 0.7            | 36.5115273    | 0.7        | 36.5115273  | 0.7         | TRUE         | TRUE              |
| 1     | FIFLFLTL   | 2     | 10   | 9              | HLA-A*02:01 | 2             | 0.7            | 41.44097837   | 0.7        | 41.44097837 | 0.7         | TRUE         | TRUE              |
| 1     | VIADVNYKL  | 404   | 412  | 9              | HLA-A*02:01 | 404           | 0.8            | 48.68890416   | 0.8        | 48.68890416 | 0.8         | TRUE         | TRUE              |
| 1     | LYKPTFFML  | 256   | 264  | 9              | HLA-A*02:01 | 256           | 1              | 53.63274187   | 1          | 53.63274187 | 1           | TRUE         | TRUE              |
| 1     | VLNDSLRL   | 958   | 966  | 9              | HLA-A*02:01 | 958           | 1.1            | 56.41959964   | 1.1        | 56.41959964 | 1.1         | TRUE         | TRUE              |
| 1     | RLDKVEAEV  | 965   | 973  | 9              | HLA-A*02:01 | 965           | 1.1            | 58.000268     | 1.1        | 58.000268   | 1.1         | TRUE         | TRUE              |
| 1     | VVFLHVTYV  | 1042  | 1050 | 9              | HLA-A*02:01 | 1042          | 1.2            | 61.4369999    | 1.2        | 61.4369999  | 1.2         | TRUE         | TRUE              |
| 1     | MIAAYTAAL  | 851   | 859  | 9              | HLA-A*02:01 | 851           | 1.2            | 62.72345896   | 1.2        | 62.72345896 | 1.2         | TRUE         | TRUE              |
| 1     | LLFNKVTLA  | 803   | 811  | 9              | HLA-A*02:01 | 803           | 1.2            | 62.86805146   | 1.2        | 62.86805146 | 1.2         | TRUE         | TRUE              |
| 1     | LLTDDMIAA  | 846   | 854  | 9              | HLA-A*02:01 | 846           | 1.3            | 70.2150161    | 1.3        | 70.2150161  | 1.3         | TRUE         | TRUE              |
| 1     | HLMSFPQAA  | 1030  | 1038 | 9              | HLA-A*02:01 | 1030          | 1.6            | 96.2564853    | 1.6        | 96.2564853  | 1.6         | TRUE         | TRUE              |
| 1     | FSISITTEV  | 700   | 708  | 9              | HLA-A*02:01 | 700           | 1.8            | 107.5053308   | 1.8        | 107.5053308 | 1.8         | TRUE         | TRUE              |
| 1     | NVYADSFVV  | 381   | 389  | 9              | HLA-A*02:01 | 381           | 2.3            | 151.1576042   | 2.3        | 151.1576042 | 2.3         | TRUE         | TRUE              |
| 1     | SIVAYTMSL  | 673   | 681  | 9              | HLA-A*02:01 | 673           | 2.3            | 152.9079268   | 2.3        | 152.9079268 | 2.3         | TRUE         | TRUE              |
| 1     | FLFLTLTS   | 4     | 12   | 9              | HLA-A*02:01 | 4             | 2.4            | 165.7410172   | 2.4        | 165.7410172 | 2.4         | TRUE         | TRUE              |
| 1     | KQMYKPTPL  | 768   | 776  | 9              | HLA-A*02:01 | 768           | 2.4            | 168.0467045   | 2.4        | 168.0467045 | 2.4         | TRUE         | TRUE              |
| 1     | VLVNSTFFS  | 354   | 362  | 9              | HLA-A*02:01 | 354           | 2.5            | 178.4144395   | 2.5        | 178.4144395 | 2.5         | TRUE         | TRUE              |
| 1     | QYKWPWYV   | 1190  | 1198 | 9              | HLA-A*02:01 | 1190          | 2.6            | 183.8357622   | 2.6        | 183.8357622 | 2.6         | TRUE         | TRUE              |
| 1     | SITTEVMVP  | 703   | 711  | 9              | HLA-A*02:01 | 703           | 2.7            | 201.1083024   | 2.7        | 201.1083024 | 2.7         | TRUE         | TRUE              |
| 1     | ALVSGTATA  | 858   | 866  | 9              | HLA-A*02:01 | 858           | 2.8            | 204.8471849   | 2.8        | 204.8471849 | 2.8         | TRUE         | TRUE              |
| 1     | NINSLIDL   | 1174  | 1182 | 9              | HLA-A*02:01 | 1174          | 2.8            | 210.1019097   | 2.8        | 210.1019097 | 2.8         | TRUE         | TRUE              |
| 1     | VYVGYQPI   | 195   | 203  | 9              | HLA-A*02:01 | 195           | 2.9            | 211.0716961   | 2.9        | 211.0716961 | 2.9         | TRUE         | TRUE              |
| 1     | GLTVLPPL   | 839   | 847  | 9              | HLA-A*02:01 | 839           | 2.9            | 212.5347752   | 2.9        | 212.5347752 | 2.9         | TRUE         | TRUE              |
| 1     | FVSGNCVV   | 1103  | 1111 | 9              | HLA-A*02:01 | 1103          | 3.1            | 233.576959    | 3.1        | 233.576959  | 3.1         | TRUE         | TRUE              |
| 1     | GLIAVMVT   | 1205  | 1213 | 9              | HLA-A*02:01 | 1205          | 3.1            | 240.674457    | 3.1        | 240.674457  | 3.1         | TRUE         | TRUE              |
| 1     | ELCDNPFFA  | 131   | 139  | 9              | HLA-A*02:01 | 131           | 3.2            | 242.90139     | 3.2        | 242.90139   | 3.2         | TRUE         | TRUE              |
| 1     | YLTDQLFLP  | 53    | 61   | 9              | HLA-A*02:01 | 53            | 3.2            | 243.4613355   | 3.2        | 243.4613355 | 3.2         | TRUE         | TRUE              |
| 1     | ATAGWTFGA  | 864   | 872  | 9              | HLA-A*02:01 | 864           | 3.2            | 248.5592902   | 3.2        | 248.5592902 | 3.2         | TRUE         | TRUE              |
| 1     | IITDNTFV   | 1096  | 1104 | 9              | HLA-A*02:01 | 1096          | 3.2            | 250.859181    | 3.2        | 250.859181  | 3.2         | TRUE         | TRUE              |
| 1     | FLPFYSNVT  | 59    | 67   | 9              | HLA-A*02:01 | 59            | 3.3            | 255.5230013   | 3.3        | 255.5230013 | 3.3         | TRUE         | TRUE              |
| 1     | KQLLSNFGA  | 946   | 954  | 9              | HLA-A*02:01 | 946           | 3.3            | 259.6749161   | 3.3        | 259.6749161 | 3.3         | TRUE         | TRUE              |
| 1     | GTSAAAYFV  | 246   | 254  | 9              | HLA-A*02:01 | 246           | 3.3            | 261.4748966   | 3.3        | 261.4748966 | 3.3         | TRUE         | TRUE              |
| 1     | IHNSTNV    | 115   | 123  | 9              | HLA-A*02:01 | 115           | 3.4            | 269.4201043   | 3.4        | 269.4201043 | 3.4         | TRUE         | TRUE              |
| 1     | ILLCMTSC   | 1214  | 1222 | 9              | HLA-A*02:01 | 1214          | 3.4            | 272.5398421   | 3.4        | 272.5398421 | 3.4         | TRUE         | TRUE              |
| 1     | AINVMVTLL  | 1208  | 1216 | 9              | HLA-A*02:01 | 1208          | 3.5            | 281.4686305   | 3.5        | 281.4686305 | 3.5         | TRUE         | TRUE              |
| 1     | ELLNAPATV  | 502   | 510  | 9              | HLA-A*02:01 | 502           | 3.6            | 288.688843    | 3.6        | 288.688843  | 3.6         | TRUE         | TRUE              |
| 1     | ALGKQLDVV  | 926   | 934  | 9              | HLA-A*02:01 | 926           | 3.7            | 305.7947324   | 3.7        | 305.7947324 | 3.7         | TRUE         | TRUE              |
| 1     | VLSFELLNA  | 498   | 506  | 9              | HLA-A*02:01 | 498           | 3.8            | 322.4259588   | 3.8        | 322.4259588 | 3.8         | TRUE         | TRUE              |
| 1     | TMNNSQSV   | 106   | 114  | 9              | HLA-A*02:01 | 106           | 3.8            | 325.4093295   | 3.8        | 325.4093295 | 3.8         | TRUE         | TRUE              |
| 1     | CMTSCSCL   | 1218  | 1226 | 9              | HLA-A*02:01 | 1218          | 4              | 355.164868    | 4          | 355.164868  | 4           | TRUE         | TRUE              |
| 1     | RVVVLSEFL  | 495   | 503  | 9              | HLA-A*02:01 | 495           | 4.1            | 367.646131    | 4.1        | 367.646131  | 4.1         | TRUE         | TRUE              |
| 1     | VIRACNFEL  | 124   | 132  | 9              | HLA-A*02:01 | 124           | 4.1            | 375.3444512   | 4.1        | 375.3444512 | 4.1         | TRUE         | TRUE              |
| 1     | VLAWNTRNI  | 420   | 428  | 9              | HLA-A*02:01 | 420           | 4.1            | 376.2097095   | 4.1        | 376.2097095 | 4.1         | TRUE         | TRUE              |
| 1     | SLTTSTAL   | 919   | 927  | 9              | HLA-A*02:01 | 919           | 4.1            | 377.9462147   | 4.1        | 377.9462147 | 4.1         | TRUE         | TRUE              |
| 1     | YQDVNCTDV  | 598   | 606  | 9              | HLA-A*02:01 | 598           | 4.1            | 384.9727594   | 4.1        | 384.9727594 | 4.1         | TRUE         | TRUE              |
| 1     | LLQYGSFCT  | 735   | 743  | 9              | HLA-A*02:01 | 735           | 4.1            | 386.7497129   | 4.1        | 386.7497129 | 4.1         | TRUE         | TRUE              |
| 1     | FSTFKCYGV  | 361   | 369  | 9              | HLA-A*02:01 | 361           | 4.1            | 388.5348685   | 4.1        | 388.5348685 | 4.1         | TRUE         | TRUE              |
| 1     | VLVENQKQI  | 897   | 905  | 9              | HLA-A*02:01 | 897           | 4.1            | 390.328264    | 4.1        | 390.328264  | 4.1         | TRUE         | TRUE              |
| 1     | PLAEKCSV   | 282   | 290  | 9              | HLA-A*02:01 | 282           | 4.2            | 404.0452449   | 4.2        | 404.0452449 | 4.2         | TRUE         | TRUE              |
| 1     | FMKQYGECL  | 815   | 823  | 9              | HLA-A*02:01 | 815           | 4.3            | 415.3650969   | 4.3        | 415.3650969 | 4.3         | TRUE         | TRUE              |
| 1     | LIAMVMTI   | 1206  | 1214 | 9              | HLA-A*02:01 | 1206          | 4.3            | 415.3650969   | 4.3        | 415.3650969 | 4.3         | TRUE         | TRUE              |
| 1     | FMGCVLAWN  | 416   | 424  | 9              | HLA-A*02:01 | 416           | 4.4            | 436.9482457   | 4.4        | 436.9482457 | 4.4         | TRUE         | TRUE              |
| 1     | KLNDLCFSN  | 373   | 381  | 9              | HLA-A*02:01 | 373           | 4.5            | 450.2254077   | 4.5        | 450.2254077 | 4.5         | TRUE         | TRUE              |
| 1     | AILTAFSPA  | 233   | 241  | 9              | HLA-A*02:01 | 233           | 4.5            | 452.3035537   | 4.5        | 452.3035537 | 4.5         | TRUE         | TRUE              |
| 1     | GIGYQPYRV  | 488   | 496  | 9              | HLA-A*02:01 | 488           | 4.7            | 484.65199     | 4.7        | 484.65199   | 4.7         | TRUE         | TRUE              |
| 1     | RLKPDFMGC  | 411   | 419  | 9              | HLA-A*02:01 | 411           | 4.8            | 498.2301443   | 4.8        | 498.2301443 | 4.8         | TRUE         | TRUE              |
| 1     | GICASYHTV  | 655   | 663  | 9              | HLA-A*02:01 | 655           | 4.8            | 501.6837107   | 4.8        | 501.6837107 | 4.8         | TRUE         | TRUE              |
| 1     | MIFDNFNC   | 151   | 159  | 9              | HLA-A*02:01 | 151           | 4.9            | 508.6628263   | 4.9        | 508.6628263 | 4.9         | TRUE         | TRUE              |
| 1     | YQPYRVVVL  | 491   | 499  | 9              | HLA-A*02:01 | 491           | 4.9            | 526.5383401   | 4.9        | 526.5383401 | 4.9         | TRUE         | TRUE              |
| 1     | TQAGCUGA   | 631   | 639  | 9              | HLA-A*02:01 | 631           | 4.9            | 532.6353667   | 4.9        | 532.6353667 | 4.9         | TRUE         | TRUE              |
| 1     | PLNDGYFYT  | 477   | 485  | 9              | HLA-A*02:01 | 477           | 5              | 538.8029936   | 5          | 538.8029936 | 5           | TRUE         | TRUE              |
| 1     | YQTSNFRVV  | 300   | 308  | 9              | HLA-A*02:01 | 300           | 5              | 538.8029936   | 5          | 538.8029936 | 5           | TRUE         | TRUE              |
| 1     | QIAPGQTGV  | 396   | 404  | 9              | HLA-A*02:01 | 396           | 5              | 548.8200891   | 5          | 548.8200891 | 5           | TRUE         | TRUE              |
| 1     | RLNEVAKNL  | 1167  | 1175 | 9              | HLA-A*02:01 | 1167          | 5              | 550.0852501   | 5          | 550.0852501 | 5           | TRUE         | TRUE              |
| 1     | WLGFAGLI   | 1199  | 1207 | 9              | HLA-A*02:01 | 1199          | 5.1            | 557.7376982   | 5.1        | 557.7376982 | 5.1         | TRUE         | TRUE              |
| 1     | IAIPTNFSI  | 694   | 702  | 9              | HLA-A*02:01 | 694           | 5.1            | 565.4966025   | 5.1        | 565.4966025 | 5.1         | TRUE         | TRUE              |
| 1     | QMAFYRNGI  | 883   | 891  | 9              | HLA-A*02:01 | 883           | 5.3            | 585.3693783   | 5.3        | 585.3693783 | 5.3         | TRUE         | TRUE              |
| 1     | VVLGFIAGL  | 1198  | 1206 | 9              | HLA-A*02:01 | 1198          | 5.3            | 589.426965    | 5.3        | 589.426965  | 5.3         | TRUE         | TRUE              |
| 1     | ALNTLVKQL  | 940   | 948  | 9              | HLA-A*02:01 | 940           | 5.4            | 607.337364    | 5.4        | 607.337364  | 5.4         | TRUE         | TRUE              |
| 1     | IKWPPWYVWL | 1192  | 1200 | 9              | HLA-A*02:01 | 1192          | 5.7            | 646.2938153   | 5.7        | 646.2938153 | 5.7         | TRUE         | TRUE              |
| 1     | VLVQDVNCT  | 596   | 604  | 9              | HLA-A*02:01 | 596           | 5.8            | 667.467309    | 5.8        | 667.467309  | 5.8         | TRUE         | TRUE              |
| 1     | IHNSTNVV   | 116   | 124  | 9              | HLA-A*02:01 | 116           | 5.9            | 681.4437301   | 5.9        | 681.4437301 | 5.9         | TRUE         | TRUE              |
| 1     | FNATKFPVS  | 329   | 337  | 9              | HLA-A*02:01 | 329           | 5.9            | 687.7490513   | 5.9        | 687.7490513 | 5.9         | TRUE         | TRUE              |
| 1     | FMLKYDENG  | 262   | 270  | 9              | HLA-A*02:01 | 262           | 6.4            | 762.833927    | 6.4        | 762.833927  | 6.4         | TRUE         | TRUE              |
| 1     | MFIFLLFLT  | 1     | 9    | 9              | HLA-A*02:01 | 1             | 6.5            | 800.6265723   | 6.5        | 800.6265723 | 6.5         | TRUE         | TRUE              |
| 1     | LLLQYGSFC  | 734   | 742  | 9              | HLA-A*02:01 | 734           | 6.6            | 826.856224    | 6.6        | 826.856224  | 6.6         | TRUE         | TRUE              |
| 1     | VYVQQLIRA  | 989   | 997  | 9              | HLA-A*02:01 | 989           | 6.8            | 857.8868286   | 6.8        | 857.8868286 | 6.8         | TRUE         | TRUE              |
| 1     | RIYSTGNV   | 620   | 628  | 9              | HLA-A*02:01 | 620           | 6.9            | 875.8505358   | 6.9        | 875.8505358 | 6.9         | TRUE         | TRUE              |
| 1     | VIGIINTV   | 1111  | 1119 | 9              | HLA-A*02:01 | 1111          | 6.9            | 883.9546811   | 6.9        | 883.9546811 | 6.9         | TRUE         | TRUE              |
| 1     | SLGADSSIA  | 680   | 688  | 9              | HLA-A*02:01 | 680           | 6.9            | 902.4642357   | 6.9        | 902.4642357 | 6.9         | TRUE         | TRUE              |
| 1     | VYVWLGFAG  | 1197  | 1205 | 9              | HLA-A*02:01 | 1197          | 7              | 908.7198189   | 7          | 908.7198189 | 7           | TRUE         | TRUE              |
| 1     | LFLPYSNV   | 58    | 66   | 9              | HLA-A*02:01 | 58            | 7              | 910.8146345   | 7          | 910.8146345 | 7           | TRUE         | TRUE              |
| 1     | IAAYTAALV  | 852   | 860  | 9              | HLA-A*02:01 | 852           | 7.1            | 923.4853282   | 7.1        | 923.4853282 | 7.1         | TRUE         | TRUE              |
| 1     | CTFEYISDA  | 159   | 167  | 9              | HLA-A*02:01 | 159           | 7.1            | 932.030233    | 7.1        | 932.030233  | 7.1         | TRUE         | TRUE              |
| 1     | QLNRALSGI  | 744   | 752  | 9              | HLA-A*02:01 | 744           | 7.1            | 938.4907576   | 7.1        | 938.4907576 | 7.1         | TRUE         | TRUE              |
| 1     | VMVTILLCC  | 1210  | 1218 | 9              | HLA-A*02:01 | 1210          | 7.3            | 984.985869    | 7.3        | 984.985869  | 7.3         | TRUE         | TRUE              |
| 1     | KEIDRLNEV  | 1163  | 1171 | 9              | HLA-A*02:01 | 1163          | 7.3            | 991.8134649   | 7.3        | 991.8134649 | 7.3         | TRUE         | TRUE              |
| 1     | AVDCSQNPL  | 275   | 283  | 9              | HLA-A*02:01 | 275           | 7.5            | 1026.667939   | 7.5        | 1026.667939 | 7.5         | TRUE         | TRUE              |
| 1     | FKDGIYFAA  | 83    | 91   | 9              | HLA-A*02:01 | 83            | 7.5            | 1031.406823   | 7.5        | 1031.406823 | 7.5         | TRUE         | TRUE              |
| 1     | LQIPFAMQM  | 876   | 884  | 9              | HLA-A*02:01 | 876           | 7.5            | 1031.406823   | 7.5        | 1031.406823 | 7.5         | TRUE         | TRUE              |
| 1     | FLHVTYVPS  | 1044  | 1052 | 9              | HLA-A*02:01 | 1044          | 7.5            | 1040.950313   | 7.5        | 1040.950313 | 7.5         | TRUE         | TRUE              |
| 1     | FV         |       |      |                |             |               |                |               |            |             |             |              |                   |

| seq # | peptide    | start | end  | peptide length | allele      | peptide index | median binding | smmpmbec IC <sub>50</sub> | smmpmbec p <sub>el</sub> | legacy IC <sub>50</sub> | legacy rank | scores equal | percentiles equal |
|-------|------------|-------|------|----------------|-------------|---------------|----------------|---------------------------|--------------------------|-------------------------|-------------|--------------|-------------------|
| 1     | VFNQTSWFI  | 1078  | 1086 | 9              | HLA-A*02:01 | 1078          | 8.4            | 1292.498358               | 8.4                      | 1292.498358             | 8.4         | TRUE         | TRUE              |
| 1     | GINASVUNI  | 1153  | 1161 | 9              | HLA-A*02:01 | 1153          | 8.4            | 1295.477874               | 8.4                      | 1295.477874             | 8.4         | TRUE         | TRUE              |
| 1     | DVSDFTDSV  | 554   | 562  | 9              | HLA-A*02:01 | 554           | 8.7            | 1372.239764               | 8.7                      | 1372.239764             | 8.7         | TRUE         | TRUE              |
| 1     | ALNCYWPIN  | 471   | 479  | 9              | HLA-A*02:01 | 471           | 8.7            | 1375.403104               | 8.7                      | 1375.403104             | 8.7         | TRUE         | TRUE              |
| 1     | FQTQAGCLI  | 629   | 637  | 9              | HLA-A*02:01 | 629           | 8.8            | 1404.203335               | 8.8                      | 1404.203335             | 8.8         | TRUE         | TRUE              |
| 1     | ILPDLKPT   | 787   | 795  | 9              | HLA-A*02:01 | 787           | 8.9            | 1443.543914               | 8.9                      | 1443.543914             | 8.9         | TRUE         | TRUE              |
| 1     | YTAALVSGT  | 855   | 863  | 9              | HLA-A*02:01 | 855           | 9              | 1470.381399               | 9                        | 1470.381399             | 9           | TRUE         | TRUE              |
| 1     | FPQAAHPGV  | 1034  | 1042 | 9              | HLA-A*02:01 | 1034          | 9.1            | 1494.273175               | 9.1                      | 1494.273175             | 9.1         | TRUE         | TRUE              |
| 1     | LITGRQLSL  | 978   | 986  | 9              | HLA-A*02:01 | 978           | 9.2            | 1504.630981               | 9.2                      | 1504.630981             | 9.2         | TRUE         | TRUE              |
| 1     | AISSVLNDI  | 954   | 962  | 9              | HLA-A*02:01 | 954           | 9.3            | 1553.924807               | 9.3                      | 1553.924807             | 9.3         | TRUE         | TRUE              |
| 1     | SIAYSNNTI  | 686   | 694  | 9              | HLA-A*02:01 | 686           | 9.7            | 1646.000641               | 9.7                      | 1646.000641             | 9.7         | TRUE         | TRUE              |
| 1     | AAQLPIPFAM | 874   | 882  | 9              | HLA-A*02:01 | 874           | 9.9            | 1711.70926                | 9.9                      | 1711.70926              | 9.9         | TRUE         | TRUE              |
| 1     | DMIAAYTAA  | 850   | 858  | 9              | HLA-A*02:01 | 850           | 9.9            | 1715.655157               | 9.9                      | 1715.655157             | 9.9         | TRUE         | TRUE              |
| 1     | AAPHGVVFL  | 1037  | 1045 | 9              | HLA-A*02:01 | 1037          | 9.9            | 1719.61015                | 9.9                      | 1719.61015              | 9.9         | TRUE         | TRUE              |
| 1     | DISGINAVF  | 1150  | 1158 | 9              | HLA-A*02:01 | 1150          | 9.9            | 1719.61015                | 9.9                      | 1719.61015              | 9.9         | TRUE         | TRUE              |
| 1     | FLYVYGYQ   | 193   | 201  | 9              | HLA-A*02:01 | 193           | 10             | 1739.522298               | 10                       | 1739.522298             | 10          | TRUE         | TRUE              |
| 1     | KLPLGINIT  | 221   | 229  | 9              | HLA-A*02:01 | 221           | 10             | 1743.532311               | 10                       | 1743.532311             | 10          | TRUE         | TRUE              |
| 1     | FITQRNFFS  | 1085  | 1093 | 9              | HLA-A*02:01 | 1085          | 10             | 1751.58009                | 10                       | 1751.58009              | 10          | TRUE         | TRUE              |
| 1     | YECDIPIGA  | 646   | 654  | 9              | HLA-A*02:01 | 646           | 10             | 1755.617899               | 10                       | 1755.617899             | 10          | TRUE         | TRUE              |
| 1     | IYQTSNFRV  | 299   | 307  | 9              | HLA-A*02:01 | 299           | 10             | 1759.665016               | 10                       | 1759.665016             | 10          | TRUE         | TRUE              |
| 1     | DLCSNVVYA  | 376   | 384  | 9              | HLA-A*02:01 | 376           | 10             | 1763.721463               | 10                       | 1763.721463             | 10          | TRUE         | TRUE              |
| 1     | AISQIQEQL  | 912   | 920  | 9              | HLA-A*02:01 | 912           | 10             | 1763.721463               | 10                       | 1763.721463             | 10          | TRUE         | TRUE              |
| 1     | FAMQAMAYRF | 880   | 888  | 9              | HLA-A*02:01 | 880           | 11             | 1796.511493               | 11                       | 1796.511493             | 11          | TRUE         | TRUE              |
| 1     | WTFGAGAAL  | 868   | 876  | 9              | HLA-A*02:01 | 868           | 12             | 1817.314116               | 12                       | 1817.314116             | 12          | TRUE         | TRUE              |
| 1     | NTLKPFIKL  | 214   | 222  | 9              | HLA-A*02:01 | 214           | 12             | 1821.503458               | 12                       | 1821.503458             | 12          | TRUE         | TRUE              |
| 1     | LCDNPFPAV  | 132   | 140  | 9              | HLA-A*02:01 | 132           | 12             | 1825.702457               | 12                       | 1825.702457             | 12          | TRUE         | TRUE              |
| 1     | ELGKYEQYI  | 1184  | 1192 | 9              | HLA-A*02:01 | 1184          | 12             | 1859.6448                 | 12                       | 1859.6448               | 12          | TRUE         | TRUE              |
| 1     | YGFYTTTGI  | 481   | 489  | 9              | HLA-A*02:01 | 481           | 12             | 1868.22853                | 12                       | 1868.22853              | 12          | TRUE         | TRUE              |
| 1     | ISDAFSLDV  | 164   | 172  | 9              | HLA-A*02:01 | 164           | 12             | 1894.218178               | 12                       | 1894.218178             | 12          | TRUE         | TRUE              |
| 1     | GINITNFRA  | 225   | 233  | 9              | HLA-A*02:01 | 225           | 12             | 1907.348271               | 12                       | 1907.348271             | 12          | TRUE         | TRUE              |
| 1     | DLPSGFNTL  | 208   | 216  | 9              | HLA-A*02:01 | 208           | 12             | 1916.152191               | 12                       | 1916.152191             | 12          | TRUE         | TRUE              |
| 1     | ELDSFKEEL  | 1126  | 1134 | 9              | HLA-A*02:01 | 1126          | 12             | 1960.78511                | 12                       | 1960.78511              | 12          | TRUE         | TRUE              |
| 1     | FIEDLIFNK  | 799   | 807  | 9              | HLA-A*02:01 | 799           | 12             | 1978.92803                | 12                       | 1978.92803              | 12          | TRUE         | TRUE              |
| 1     | IVMVTLLC   | 1209  | 1217 | 9              | HLA-A*02:01 | 1209          | 12             | 2001.842937               | 12                       | 2001.842937             | 12          | TRUE         | TRUE              |
| 1     | VVVSLSFELL | 496   | 504  | 9              | HLA-A*02:01 | 496           | 12             | 2011.083024               | 12                       | 2011.083024             | 12          | TRUE         | TRUE              |
| 1     | FAATEKSNV  | 89    | 97   | 9              | HLA-A*02:01 | 89            | 12             | 2015.719049               | 12                       | 2015.719049             | 12          | TRUE         | TRUE              |
| 1     | AQDIWGTSA  | 241   | 249  | 9              | HLA-A*02:01 | 241           | 12             | 2029.691346               | 12                       | 2029.691346             | 12          | TRUE         | TRUE              |
| 1     | FSQILPDPL  | 784   | 792  | 9              | HLA-A*02:01 | 784           | 12             | 2048.471849               | 12                       | 2048.471849             | 12          | TRUE         | TRUE              |
| 1     | FDEEDSEPV  | 1238  | 1246 | 9              | HLA-A*02:01 | 1238          | 12             | 2053.194064               | 12                       | 2053.194064             | 12          | TRUE         | TRUE              |
| 1     | ILDISPCSF  | 570   | 578  | 9              | HLA-A*02:01 | 570           | 12             | 2145.013353               | 12                       | 2145.013353             | 12          | TRUE         | TRUE              |
| 1     | IMVITLLCOM | 1211  | 1219 | 9              | HLA-A*02:01 | 1211          | 12             | 2174.853461               | 12                       | 2174.853461             | 12          | TRUE         | TRUE              |
| 1     | PALNCYWPL  | 470   | 478  | 9              | HLA-A*02:01 | 470           | 13             | 2194.977132               | 13                       | 2194.977132             | 13          | TRUE         | TRUE              |
| 1     | SNFGAIVSV  | 950   | 958  | 9              | HLA-A*02:01 | 950           | 13             | 2205.108686               | 13                       | 2205.108686             | 13          | TRUE         | TRUE              |
| 1     | IAIVMTVIL  | 1207  | 1215 | 9              | HLA-A*02:01 | 1207          | 13             | 2266.887669               | 13                       | 2266.887669             | 13          | TRUE         | TRUE              |
| 1     | YFREGVVFV  | 1070  | 1078 | 9              | HLA-A*02:01 | 1070          | 13             | 2309.03226                | 13                       | 2309.03226              | 13          | TRUE         | TRUE              |
| 1     | AGLIAIVMV  | 1204  | 1212 | 9              | HLA-A*02:01 | 1204          | 13             | 2379.194789               | 13                       | 2379.194789             | 13          | TRUE         | TRUE              |
| 1     | VYDPLQPEL  | 1119  | 1127 | 9              | HLA-A*02:01 | 1119          | 13             | 2395.68658                | 13                       | 2395.68658              | 13          | TRUE         | TRUE              |
| 1     | NGLTVLPLP  | 838   | 846  | 9              | HLA-A*02:01 | 838           | 13             | 2401.209207               | 13                       | 2401.209207             | 13          | TRUE         | TRUE              |
| 1     | GAALQIPFA  | 873   | 881  | 9              | HLA-A*02:01 | 873           | 13             | 2412.292686               | 13                       | 2412.292686             | 13          | TRUE         | TRUE              |
| 1     | YICGDSTEC  | 723   | 731  | 9              | HLA-A*02:01 | 723           | 13             | 2537.639934               | 13                       | 2537.639934             | 13          | TRUE         | TRUE              |
| 1     | DLILFNKVT  | 802   | 810  | 9              | HLA-A*02:01 | 802           | 13             | 2567.024419               | 13                       | 2567.024419             | 13          | TRUE         | TRUE              |
| 1     | NAQALNTLV  | 937   | 945  | 9              | HLA-A*02:01 | 937           | 14             | 2688.00455                | 14                       | 2688.00455              | 14          | TRUE         | TRUE              |
| 1     | FKLPLGINI  | 220   | 228  | 9              | HLA-A*02:01 | 220           | 14             | 2694.201043               | 14                       | 2694.201043             | 14          | TRUE         | TRUE              |
| 1     | LLCCMTSCC  | 1215  | 1223 | 9              | HLA-A*02:01 | 1215          | 14             | 2700.411818               | 14                       | 2700.411818             | 14          | TRUE         | TRUE              |
| 1     | LPDDFMGCV  | 412   | 420  | 9              | HLA-A*02:01 | 412           | 14             | 2700.411818               | 14                       | 2700.411818             | 14          | TRUE         | TRUE              |
| 1     | NTREVFQAV  | 759   | 767  | 9              | HLA-A*02:01 | 759           | 14             | 2719.130179               | 14                       | 2719.130179             | 14          | TRUE         | TRUE              |
| 1     | LQTYVTQQL  | 986   | 994  | 9              | HLA-A*02:01 | 986           | 14             | 2860.421278               | 14                       | 2860.421278             | 14          | TRUE         | TRUE              |
| 1     | FFSPQITTT  | 1091  | 1099 | 9              | HLA-A*02:01 | 1091          | 14             | 2880.248771               | 14                       | 2880.248771             | 14          | TRUE         | TRUE              |
| 1     | KLQDVVNQN  | 929   | 937  | 9              | HLA-A*02:01 | 929           | 14             | 2886.88843                | 14                       | 2886.88843              | 14          | TRUE         | TRUE              |
| 1     | PLTDDMIA   | 845   | 853  | 9              | HLA-A*02:01 | 845           | 14             | 2906.899385               | 14                       | 2906.899385             | 14          | TRUE         | TRUE              |
| 1     | ASYHTVSL   | 658   | 666  | 9              | HLA-A*02:01 | 658           | 14             | 2913.60048                | 14                       | 2913.60048              | 14          | TRUE         | TRUE              |
| 1     | VAYTMSLGA  | 675   | 683  | 9              | HLA-A*02:01 | 675           | 14             | 2967.768357               | 14                       | 2967.768357             | 14          | TRUE         | TRUE              |
| 1     | KNKDGFLVY  | 188   | 196  | 9              | HLA-A*02:01 | 188           | 14             | 2981.466953               | 14                       | 2981.466953             | 14          | TRUE         | TRUE              |
| 1     | VMPVSMYAKT | 708   | 716  | 9              | HLA-A*02:01 | 708           | 14             | 3002.133495               | 14                       | 3002.133495             | 14          | TRUE         | TRUE              |
| 1     | VVGIIINNT  | 1110  | 1118 | 9              | HLA-A*02:01 | 1110          | 14             | 3072.062167               | 14                       | 3072.062167             | 14          | TRUE         | TRUE              |
| 1     | FRSDTLYLT  | 47    | 55   | 9              | HLA-A*02:01 | 47            | 14             | 3086.242162               | 14                       | 3086.242162             | 14          | TRUE         | TRUE              |
| 1     | DILSRDLKV  | 961   | 969  | 9              | HLA-A*02:01 | 961           | 15             | 3158.129977               | 15                       | 3158.129977             | 15          | TRUE         | TRUE              |
| 1     | QQILRAAEI  | 992   | 1000 | 9              | HLA-A*02:01 | 992           | 15             | 3158.129977               | 15                       | 3158.129977             | 15          | TRUE         | TRUE              |
| 1     | DIWGTSA    | 243   | 251  | 9              | HLA-A*02:01 | 243           | 15             | 3209.445461               | 15                       | 3209.445461             | 15          | TRUE         | TRUE              |
| 1     | KLSTDLIKN  | 514   | 522  | 9              | HLA-A*02:01 | 514           | 15             | 3239.142094               | 15                       | 3239.142094             | 15          | TRUE         | TRUE              |
| 1     | RVVPSGDVV  | 306   | 314  | 9              | HLA-A*02:01 | 306           | 15             | 3246.609088               | 15                       | 3246.609088             | 15          | TRUE         | TRUE              |
| 1     | NMYIKGDS   | 721   | 729  | 9              | HLA-A*02:01 | 721           | 15             | 3269.113507               | 15                       | 3269.113507             | 15          | TRUE         | TRUE              |
| 1     | TLADAGFMK  | 809   | 817  | 9              | HLA-A*02:01 | 809           | 15             | 3329.890865               | 15                       | 3329.890865             | 15          | TRUE         | TRUE              |
| 1     | CVLGQSKRV  | 1014  | 1022 | 9              | HLA-A*02:01 | 1014          | 15             | 3345.260943               | 15                       | 3345.260943             | 15          | TRUE         | TRUE              |
| 1     | AATEKSNVV  | 90    | 98   | 9              | HLA-A*02:01 | 90            | 15             | 3438.982771               | 15                       | 3438.982771             | 15          | TRUE         | TRUE              |
| 1     | YFVGYLKPT  | 252   | 260  | 9              | HLA-A*02:01 | 252           | 15             | 3626.01837                | 15                       | 3626.01837              | 15          | TRUE         | TRUE              |
| 1     | AFNCTFEYI  | 156   | 164  | 9              | HLA-A*02:01 | 156           | 16             | 3668.005684               | 16                       | 3668.005684             | 16          | TRUE         | TRUE              |
| 1     | LYLTQDLFL  | 52    | 60   | 9              | HLA-A*02:01 | 52            | 16             | 3676.46131                | 16                       | 3676.46131              | 16          | TRUE         | TRUE              |
| 1     | YISDAFSLD  | 163   | 171  | 9              | HLA-A*02:01 | 163           | 16             | 3693.431085               | 16                       | 3693.431085             | 16          | TRUE         | TRUE              |
| 1     | TMIFDNAFN  | 150   | 158  | 9              | HLA-A*02:01 | 150           | 16             | 3701.945323               | 16                       | 3701.945323             | 16          | TRUE         | TRUE              |
| 1     | PIFKPLPGI  | 218   | 226  | 9              | HLA-A*02:01 | 218           | 16             | 3796.907351               | 16                       | 3796.907351             | 16          | TRUE         | TRUE              |
| 1     | VQIDRLITG  | 973   | 981  | 9              | HLA-A*02:01 | 973           | 16             | 3903.28264                | 16                       | 3903.28264              | 16          | TRUE         | TRUE              |
| 1     | HLREVFVKV  | 181   | 189  | 9              | HLA-A*02:01 | 181           | 16             | 3985.015363               | 16                       | 3985.015363             | 16          | TRUE         | TRUE              |
| 1     | FKNHTSPDV  | 1138  | 1146 | 9              | HLA-A*02:01 | 1138          | 16             | 4049.766653               | 16                       | 4049.766653             | 16          | TRUE         | TRUE              |
| 1     | CVNPNFNGI  | 524   | 532  | 9              | HLA-A*02:01 | 524           | 16             | 4077.838295               | 16                       | 4077.838295             | 16          | TRUE         | TRUE              |
| 1     | TALGLKQDV  | 925   | 933  | 9              | HLA-A*02:01 | 925           | 16             | 4125.057437               | 16                       | 4125.057437             | 16          | TRUE         | TRUE              |
| 1     | LTQDLFPF   | 54    | 62   | 9              | HLA-A*02:01 | 54            | 16             | 4134.566676               | 16                       | 4134.566676             | 16          | TRUE         | TRUE              |
| 1     | FGAGAAALQI | 870   | 878  | 9              | HLA-A*02:01 | 870           | 16             | 4163.226123               | 16                       | 4163.226123             | 16          | TRUE         | TRUE              |
| 1     | GLTGTGLVT  | 531   | 539  | 9              | HLA-A*02:01 | 531           | 17             | 4211.43401                | 17                       | 4211.43401              | 17          | TRUE         | TRUE              |
| 1     | LQDVVNQNA  | 930   | 938  | 9              | HLA-A*02:01 | 930           | 17             | 4471.260778               | 17                       | 4471.260778             | 17          | TRUE         | TRUE              |
| 1     | ILTAFAFPAQ | 234   | 242  | 9              | HLA-A*02:01 | 234           | 17             | 4491.89918                | 17                       | 4491.89918              | 17          | TRUE         | TRUE              |
| 1     | KWPVYVWVLG | 1193  | 1201 | 9              | HLA-A*02:01 | 1193          | 17             | 4502.25408                | 17                       | 4502.25408              | 17          | TRUE         | TRUE              |
| 1     | KLRFPERDI  | 447   | 455  | 9              | HLA-A*02:01 | 447           | 17             | 4512.632844               | 17                       | 4512.632844             | 17          | TRUE         | TRUE              |
| 1     | MSLGADSSI  | 679   |      |                |             |               |                |                           |                          |                         |             |              |                   |

| seq # | peptide    | start | end  | peptide length | allele      | peptide index | median binding | smmpmbec IC50 | smmpmbec p | legacy IC50 | legacy rank | scores equal | percentiles equal |
|-------|------------|-------|------|----------------|-------------|---------------|----------------|---------------|------------|-------------|-------------|--------------|-------------------|
| 1     | CSFGGVSVI  | 576   | 584  | 9              | HLA-A*02:01 | 576           | 18             | 5229.136757   | 18         | 5229.136757 | 18          | TRUE         | TRUE              |
| 1     | SVVNIQKEI  | 1157  | 1165 | 9              | HLA-A*02:01 | 1157          | 18             | 5277.521363   | 18         | 5277.521363 | 18          | TRUE         | TRUE              |
| 1     | LQSLQTVYT  | 983   | 991  | 9              | HLA-A*02:01 | 983           | 18             | 5314.103394   | 18         | 5314.103394 | 18          | TRUE         | TRUE              |
| 1     | IFRSDTLYL  | 46    | 54   | 9              | HLA-A*02:01 | 46            | 18             | 5326.35367    | 18         | 5326.35367  | 18          | TRUE         | TRUE              |
| 1     | IHADQLTPA  | 610   | 618  | 9              | HLA-A*02:01 | 610           | 18             | 5363.274187   | 18         | 5363.274187 | 18          | TRUE         | TRUE              |
| 1     | VVRGWVFGS  | 97    | 105  | 9              | HLA-A*02:01 | 97            | 18             | 5388.029936   | 18         | 5388.029936 | 18          | TRUE         | TRUE              |
| 1     | SVDCNMYIC  | 717   | 725  | 9              | HLA-A*02:01 | 717           | 18             | 5412.899952   | 18         | 5412.899952 | 18          | TRUE         | TRUE              |
| 1     | GNCDVVIGI  | 1106  | 1114 | 9              | HLA-A*02:01 | 1106          | 18             | 5425.377975   | 18         | 5425.377975 | 18          | TRUE         | TRUE              |
| 1     | ALSGIAAEQ  | 748   | 756  | 9              | HLA-A*02:01 | 748           | 19             | 5500.852501   | 19         | 5500.852501 | 19          | TRUE         | TRUE              |
| 1     | SSMRGVVYP  | 35    | 43   | 9              | HLA-A*02:01 | 35            | 19             | 5538.982589   | 19         | 5538.982589 | 19          | TRUE         | TRUE              |
| 1     | TLYLTQDLF  | 51    | 59   | 9              | HLA-A*02:01 | 51            | 19             | 5628.983816   | 19         | 5628.983816 | 19          | TRUE         | TRUE              |
| 1     | FNFNGLTGT  | 527   | 535  | 9              | HLA-A*02:01 | 527           | 19             | 5707.290781   | 19         | 5707.290781 | 19          | TRUE         | TRUE              |
| 1     | VTLADAGFM  | 808   | 816  | 9              | HLA-A*02:01 | 808           | 19             | 5746.85183    | 19         | 5746.85183  | 19          | TRUE         | TRUE              |
| 1     | QIQESLTTT  | 915   | 923  | 9              | HLA-A*02:01 | 915           | 19             | 5760.099692   | 19         | 5760.099692 | 19          | TRUE         | TRUE              |
| 1     | SMRGVYYPD  | 36    | 44   | 9              | HLA-A*02:01 | 36            | 19             | 5894.26965    | 19         | 5894.26965  | 19          | TRUE         | TRUE              |
| 1     | ISPCFGGV   | 573   | 581  | 9              | HLA-A*02:01 | 573           | 19             | 6031.564828   | 19         | 6031.564828 | 19          | TRUE         | TRUE              |
| 1     | YYPDEIFRS  | 41    | 49   | 9              | HLA-A*02:01 | 41            | 19             | 6045.46902    | 19         | 6045.46902  | 19          | TRUE         | TRUE              |
| 1     | YKGYQPIDV  | 197   | 205  | 9              | HLA-A*02:01 | 197           | 19             | 6115.472252   | 19         | 6115.472252 | 19          | TRUE         | TRUE              |
| 1     | VWVWLGFIA  | 1196  | 1204 | 9              | HLA-A*02:01 | 1196          | 19             | 6186.286084   | 19         | 6186.286084 | 19          | TRUE         | TRUE              |
| 1     | KSFEIDKGI  | 291   | 299  | 9              | HLA-A*02:01 | 291           | 19             | 6229.16737    | 19         | 6229.16737  | 19          | TRUE         | TRUE              |
| 1     | LNLDLCSNV  | 374   | 382  | 9              | HLA-A*02:01 | 374           | 19             | 6229.16737    | 19         | 6229.16737  | 19          | TRUE         | TRUE              |
| 1     | VVNQNAQAL  | 933   | 941  | 9              | HLA-A*02:01 | 933           | 19             | 6257.9199     | 19         | 6257.9199   | 19          | TRUE         | TRUE              |
| 1     | AQVKQMYKT  | 765   | 773  | 9              | HLA-A*02:01 | 765           | 19             | 6286.805146   | 19         | 6286.805146 | 19          | TRUE         | TRUE              |
| 1     | QIANQFNKA  | 904   | 912  | 9              | HLA-A*02:01 | 904           | 20             | 6448.073808   | 20         | 6448.073808 | 20          | TRUE         | TRUE              |
| 1     | STECANLLL  | 728   | 736  | 9              | HLA-A*02:01 | 728           | 20             | 6477.836765   | 20         | 6477.836765 | 20          | TRUE         | TRUE              |
| 1     | AATKMSECV  | 1007  | 1015 | 9              | HLA-A*02:01 | 1007          | 20             | 6477.836765   | 20         | 6477.836765 | 20          | TRUE         | TRUE              |
| 1     | FELCDNPF   | 130   | 138  | 9              | HLA-A*02:01 | 130           | 20             | 6659.321771   | 20         | 6659.321771 | 20          | TRUE         | TRUE              |
| 1     | SQKSIIVAT  | 670   | 678  | 9              | HLA-A*02:01 | 670           | 20             | 6720.939716   | 20         | 6720.939716 | 20          | TRUE         | TRUE              |
| 1     | RLITGRLOS  | 977   | 985  | 9              | HLA-A*02:01 | 977           | 20             | 6814.437301   | 20         | 6814.437301 | 20          | TRUE         | TRUE              |
| 1     | CVADYSVLY  | 348   | 356  | 9              | HLA-A*02:01 | 348           | 20             | 6814.4373     | 20         | 6814.4373   | 20          | TRUE         | TRUE              |
| 1     | SMAKTSVDC  | 712   | 720  | 9              | HLA-A*02:01 | 712           | 20             | 6830.146202   | 20         | 6830.146202 | 20          | TRUE         | TRUE              |
| 1     | SVLYNSTFF  | 353   | 361  | 9              | HLA-A*02:01 | 353           | 20             | 6957.1281     | 20         | 6957.1281   | 20          | TRUE         | TRUE              |
| 1     | KCSVSFEI   | 287   | 295  | 9              | HLA-A*02:01 | 287           | 20             | 6973.165937   | 20         | 6973.165937 | 20          | TRUE         | TRUE              |
| 1     | FQPFQQFGR  | 545   | 553  | 9              | HLA-A*02:01 | 545           | 20             | 6989.240744   | 20         | 6989.240744 | 20          | TRUE         | TRUE              |
| 1     | NIQKEIDRL  | 1160  | 1168 | 9              | HLA-A*02:01 | 1160          | 20             | 7005.352608   | 20         | 7005.352608 | 20          | TRUE         | TRUE              |
| 1     | TILLCMTS   | 1213  | 1221 | 9              | HLA-A*02:01 | 1213          | 20             | 7053.911393   | 20         | 7053.911393 | 20          | TRUE         | TRUE              |
| 1     | SVLIHNNST  | 113   | 121  | 9              | HLA-A*02:01 | 113           | 21             | 7201.61666    | 21         | 7201.61666  | 21          | TRUE         | TRUE              |
| 1     | GYQPYRVVV  | 490   | 498  | 9              | HLA-A*02:01 | 490           | 21             | 7201.616655   | 21         | 7201.616655 | 21          | TRUE         | TRUE              |
| 1     | KAYFPREGV  | 1068  | 1076 | 9              | HLA-A*02:01 | 1068          | 21             | 7218.218096   | 21         | 7218.218096 | 21          | TRUE         | TRUE              |
| 1     | AYSNNITAI  | 688   | 696  | 9              | HLA-A*02:01 | 688           | 21             | 7251.535877   | 21         | 7251.535877 | 21          | TRUE         | TRUE              |
| 1     | STFTSFKFC  | 358   | 366  | 9              | HLA-A*02:01 | 358           | 21             | 7335.504705   | 21         | 7335.504705 | 21          | TRUE         | TRUE              |
| 1     | DQLTPAWRI  | 613   | 621  | 9              | HLA-A*02:01 | 613           | 21             | 7420.445846   | 21         | 7420.445846 | 21          | TRUE         | TRUE              |
| 1     | GVSVITPGT  | 580   | 588  | 9              | HLA-A*02:01 | 580           | 21             | 7420.445846   | 21         | 7420.445846 | 21          | TRUE         | TRUE              |
| 1     | VDLGDISGI  | 1146  | 1154 | 9              | HLA-A*02:01 | 1146          | 21             | 7437.55174    | 21         | 7437.55174  | 21          | TRUE         | TRUE              |
| 1     | KGYQPIDVV  | 198   | 206  | 9              | HLA-A*02:01 | 198           | 21             | 7454.697068   | 21         | 7454.697068 | 21          | TRUE         | TRUE              |
| 1     | IAQKFNGLT  | 834   | 842  | 9              | HLA-A*02:01 | 834           | 21             | 7752.289811   | 21         | 7752.289811 | 21          | TRUE         | TRUE              |
| 1     | STAIHADQL  | 607   | 615  | 9              | HLA-A*02:01 | 607           | 21             | 7788.072755   | 21         | 7788.072755 | 21          | TRUE         | TRUE              |
| 1     | MLKYDENG   | 263   | 271  | 9              | HLA-A*02:01 | 263           | 22             | 7987.851823   | 22         | 7987.851823 | 22          | TRUE         | TRUE              |
| 1     | AGWTFGAGA  | 866   | 874  | 9              | HLA-A*02:01 | 866           | 22             | 8043.220967   | 22         | 8043.220967 | 22          | TRUE         | TRUE              |
| 1     | LLNAPATVC  | 503   | 511  | 9              | HLA-A*02:01 | 503           | 22             | 8173.912794   | 22         | 8173.912794 | 22          | TRUE         | TRUE              |
| 1     | CPFGVEFNA  | 323   | 331  | 9              | HLA-A*02:01 | 323           | 22             | 8192.755609   | 22         | 8192.755609 | 22          | TRUE         | TRUE              |
| 1     | YADSFVVK   | 383   | 391  | 9              | HLA-A*02:01 | 383           | 22             | 8192.755609   | 22         | 8192.755609 | 22          | TRUE         | TRUE              |
| 1     | IEDLFFNKV  | 800   | 808  | 9              | HLA-A*02:01 | 800           | 22             | 8192.755609   | 22         | 8192.755609 | 22          | TRUE         | TRUE              |
| 1     | YTMISLGADS | 677   | 685  | 9              | HLA-A*02:01 | 677           | 22             | 8539.451966   | 22         | 8539.451966 | 22          | TRUE         | TRUE              |
| 1     | NITNFRAIL  | 227   | 235  | 9              | HLA-A*02:01 | 227           | 22             | 8559.137436   | 22         | 8559.137436 | 22          | TRUE         | TRUE              |
| 1     | STGNNVFQT  | 623   | 631  | 9              | HLA-A*02:01 | 623           | 22             | 8758.505358   | 22         | 8758.505358 | 22          | TRUE         | TRUE              |
| 1     | PMGTQTHTM  | 143   | 151  | 9              | HLA-A*02:01 | 143           | 22             | 8880.348305   | 22         | 8880.348305 | 22          | TRUE         | TRUE              |
| 1     | SVLNDILSR  | 957   | 965  | 9              | HLA-A*02:01 | 957           | 22             | 8900.819622   | 22         | 8900.819622 | 22          | TRUE         | TRUE              |
| 1     | TFVSGNCDV  | 1102  | 1110 | 9              | HLA-A*02:01 | 1102          | 22             | 9045.446306   | 22         | 9045.446306 | 22          | TRUE         | TRUE              |
| 1     | STSQKSIVA  | 668   | 676  | 9              | HLA-A*02:01 | 668           | 22             | 9066.298213   | 22         | 9066.298213 | 22          | TRUE         | TRUE              |
| 1     | ILURAAEIRA | 994   | 1002 | 9              | HLA-A*02:01 | 994           | 23             | 9406.542023   | 23         | 9406.542023 | 23          | TRUE         | TRUE              |
| 1     | GIGVGTQNL  | 890   | 898  | 9              | HLA-A*02:01 | 890           | 23             | 9471.745057   | 23         | 9471.745057 | 23          | TRUE         | TRUE              |
| 1     | VTILCCMT   | 1212  | 1220 | 9              | HLA-A*02:01 | 1212          | 23             | 9493.579684   | 23         | 9493.579684 | 23          | TRUE         | TRUE              |
| 1     | ITDNTFVS   | 1097  | 1105 | 9              | HLA-A*02:01 | 1097          | 23             | 9559.386035   | 23         | 9559.386035 | 23          | TRUE         | TRUE              |
| 1     | NASSEVAVL  | 589   | 597  | 9              | HLA-A*02:01 | 589           | 23             | 9714.713563   | 23         | 9714.713563 | 23          | TRUE         | TRUE              |
| 1     | NGIGVTQNV  | 889   | 897  | 9              | HLA-A*02:01 | 889           | 23             | 9759.554643   | 23         | 9759.554643 | 23          | TRUE         | TRUE              |
| 1     | SQIQESLTT  | 914   | 922  | 9              | HLA-A*02:01 | 914           | 23             | 9782.05274    | 23         | 9782.05274  | 23          | TRUE         | TRUE              |
| 1     | SISITTEVM  | 701   | 709  | 9              | HLA-A*02:01 | 701           | 23             | 9782.05274    | 23         | 9782.05274  | 23          | TRUE         | TRUE              |
| 1     | LYNSTFFST  | 355   | 363  | 9              | HLA-A*02:01 | 355           | 23             | 9804.602701   | 23         | 9804.602701 | 23          | TRUE         | TRUE              |
| 1     | QIPFAMQMA  | 877   | 885  | 9              | HLA-A*02:01 | 877           | 23             | 9895.323572   | 23         | 9895.323572 | 23          | TRUE         | TRUE              |
| 1     | CLGDINARD  | 822   | 830  | 9              | HLA-A*02:01 | 822           | 23             | 10079.29137   | 23         | 10079.29137 | 23          | TRUE         | TRUE              |
| 1     | FSLDVSEKS  | 168   | 176  | 9              | HLA-A*02:01 | 168           | 23             | 10125.81527   | 23         | 10125.81527 | 23          | TRUE         | TRUE              |
| 1     | EYISDAFSL  | 162   | 170  | 9              | HLA-A*02:01 | 162           | 24             | 10337.84461   | 24         | 10337.84461 | 24          | TRUE         | TRUE              |
| 1     | VRFPNITNL  | 314   | 322  | 9              | HLA-A*02:01 | 314           | 24             | 10409.50313   | 24         | 10409.50313 | 24          | TRUE         | TRUE              |
| 1     | TQDLFLPFY  | 55    | 63   | 9              | HLA-A*02:01 | 55            | 24             | 10505.82107   | 24         | 10505.82107 | 24          | TRUE         | TRUE              |
| 1     | SNCVADYSV  | 346   | 354  | 9              | HLA-A*02:01 | 346           | 24             | 10530.03949   | 24         | 10530.03949 | 24          | TRUE         | TRUE              |
| 1     | QMYKTPTLK  | 769   | 777  | 9              | HLA-A*02:01 | 769           | 24             | 10603.03024   | 24         | 10603.03024 | 24          | TRUE         | TRUE              |
| 1     | QTVYTQQQL  | 987   | 995  | 9              | HLA-A*02:01 | 987           | 24             | 10676.52693   | 24         | 10676.52693 | 24          | TRUE         | TRUE              |
| 1     | QKFVNGTLV  | 835   | 843  | 9              | HLA-A*02:01 | 835           | 24             | 10701.13887   | 24         | 10701.13887 | 24          | TRUE         | TRUE              |
| 1     | RGVYYPDEI  | 38    | 46   | 9              | HLA-A*02:01 | 38            | 24             | 10875.01839   | 24         | 10875.01839 | 24          | TRUE         | TRUE              |
| 1     | LMSFPOAAP  | 1031  | 1039 | 9              | HLA-A*02:01 | 1031          | 24             | 10875.0184    | 24         | 10875.0184  | 24          | TRUE         | TRUE              |
| 1     | VTQQLIRAA  | 990   | 998  | 9              | HLA-A*02:01 | 990           | 24             | 10900.0879    | 24         | 10900.0879  | 24          | TRUE         | TRUE              |
| 1     | SVITPGTNA  | 582   | 590  | 9              | HLA-A*02:01 | 582           | 24             | 11026.30496   | 24         | 11026.30496 | 24          | TRUE         | TRUE              |
| 1     | EIDKGIYQT  | 294   | 302  | 9              | HLA-A*02:01 | 294           | 24             | 11026.30496   | 24         | 11026.30496 | 24          | TRUE         | TRUE              |
| 1     | LTLTSGSDL  | 8     | 16   | 9              | HLA-A*02:01 | 8             | 24             | 11283.1406    | 24         | 11283.1406  | 24          | TRUE         | TRUE              |
| 1     | FGGFNFSGI  | 779   | 787  | 9              | HLA-A*02:01 | 779           | 25             | 11545.95871   | 25         | 11545.95871 | 25          | TRUE         | TRUE              |
| 1     | FSPDGKPC   | 460   | 468  | 9              | HLA-A*02:01 | 460           | 25             | 11545.95871   | 25         | 11545.95871 | 25          | TRUE         | TRUE              |
| 1     | IPTNFISII  | 696   | 704  | 9              | HLA-A*02:01 | 696           | 25             | 11760.61411   | 25         | 11760.61411 | 25          | TRUE         | TRUE              |
| 1     | SGFNTLKPI  | 211   | 219  | 9              | HLA-A*02:01 | 211           | 25             | 11760.61411   | 25         | 11760.61411 | 25          | TRUE         | TRUE              |
| 1     | YIKWPWYVW  | 1191  | 1199 | 9              | HLA-A*02:01 | 1191          | 25             | 11787.72512   | 25         | 11787.72512 | 25          | TRUE         | TRUE              |
| 1     | GCLGAEHV   | 634   | 642  | 9              | HLA-A*02:01 | 634           | 25             | 11842.13479   | 25         | 11842.13479 | 25          | TRUE         | TRUE              |
| 1     | FVFKNKDGF  | 185   | 193  | 9              | HLA-A*02:01 | 185           | 25             | 11979.26025   | 25         | 11979.26025 | 25          | TRUE         | TRUE              |
| 1     | FNGLTGTGV  | 529   | 537  | 9              | HLA-A*02:01 | 529           | 25             | 11979.26025   | 25         | 11979.26025 | 25          | TRUE         | TRUE              |
| 1     | RNFTTAPAI  | 1055  | 1063 | 9              | HLA-A*02:01 | 1055          | 25             | 12062.29651   | 25         | 12062.29651 | 25          | TRUE         | TRUE              |

| seq # | peptide    | start | end  | peptide length | allele      | peptide index | median binding | smmpmbec IC50 | smmpmbec p | legacy IC50 | legacy rank | scores equal | percentiles equal |
|-------|------------|-------|------|----------------|-------------|---------------|----------------|---------------|------------|-------------|-------------|--------------|-------------------|
| 1     | NAFNCTFEY  | 155   | 163  | 9              | HLA-A*02:01 | 155           | 26             | 13722.39764   | 26         | 13722.39764 | 26          | TRUE         | TRUE              |
| 1     | FLTLTSGSD  | 7     | 15   | 9              | HLA-A*02:01 | 7             | 26             | 13945.36867   | 26         | 13945.36867 | 26          | TRUE         | TRUE              |
| 1     | GIINNTVYD  | 1113  | 1121 | 9              | HLA-A*02:01 | 1113          | 26             | 14204.63243   | 26         | 14204.63243 | 26          | TRUE         | TRUE              |
| 1     | FCGKGVHLM  | 1024  | 1032 | 9              | HLA-A*02:01 | 1024          | 26             | 14237.37749   | 26         | 14237.37749 | 26          | TRUE         | TRUE              |
| 1     | CSQNPLAEL  | 278   | 286  | 9              | HLA-A*02:01 | 278           | 26             | 14303.09424   | 26         | 14303.09424 | 26          | TRUE         | TRUE              |
| 1     | SFIEDLLFN  | 798   | 806  | 9              | HLA-A*02:01 | 798           | 26             | 14402.23855   | 26         | 14402.23855 | 26          | TRUE         | TRUE              |
| 1     | EQDRNTRFV  | 755   | 763  | 9              | HLA-A*02:01 | 755           | 27             | 14502.0701    | 27         | 14502.0701  | 27          | TRUE         | TRUE              |
| 1     | SNVTGFHTI  | 64    | 72   | 9              | HLA-A*02:01 | 64            | 27             | 14502.0701    | 27         | 14502.0701  | 27          | TRUE         | TRUE              |
| 1     | TTSTALGKL  | 922   | 930  | 9              | HLA-A*02:01 | 922           | 27             | 14737.70978   | 27         | 14737.70978 | 27          | TRUE         | TRUE              |
| 1     | SNVYADSFV  | 380   | 388  | 9              | HLA-A*02:01 | 380           | 27             | 14874.07613   | 27         | 14874.07613 | 27          | TRUE         | TRUE              |
| 1     | IINNTVYDP  | 1114  | 1122 | 9              | HLA-A*02:01 | 1114          | 27             | 14874.07613   | 27         | 14874.07613 | 27          | TRUE         | TRUE              |
| 1     | VTQNVLIVEN | 893   | 901  | 9              | HLA-A*02:01 | 893           | 27             | 14942.73175   | 27         | 14942.73175 | 27          | TRUE         | TRUE              |
| 1     | SLRSTSQK   | 664   | 672  | 9              | HLA-A*02:01 | 664           | 27             | 14977.1783    | 27         | 14977.1783  | 27          | TRUE         | TRUE              |
| 1     | ELIDISPCS  | 569   | 577  | 9              | HLA-A*02:01 | 569           | 27             | 15080.99514   | 27         | 15080.99514 | 27          | TRUE         | TRUE              |
| 1     | KTSEILDIS  | 566   | 574  | 9              | HLA-A*02:01 | 566           | 27             | 15185.5316    | 27         | 15185.5316  | 27          | TRUE         | TRUE              |
| 1     | CLIGAEHVD  | 635   | 643  | 9              | HLA-A*02:01 | 635           | 27             | 15255.62483   | 27         | 15255.62483 | 27          | TRUE         | TRUE              |
| 1     | ISGINASVW  | 1151  | 1159 | 9              | HLA-A*02:01 | 1151          | 27             | 15255.62483   | 27         | 15255.62483 | 27          | TRUE         | TRUE              |
| 1     | LTPAWRIYS  | 615   | 623  | 9              | HLA-A*02:01 | 615           | 27             | 15503.5088    | 27         | 15503.5088  | 27          | TRUE         | TRUE              |
| 1     | GADSSIAYS  | 682   | 690  | 9              | HLA-A*02:01 | 682           | 27             | 15539.24807   | 27         | 15539.24807 | 27          | TRUE         | TRUE              |
| 1     | NLLLOYGSF  | 733   | 741  | 9              | HLA-A*02:01 | 733           | 27             | 15539.24807   | 27         | 15539.24807 | 27          | TRUE         | TRUE              |
| 1     | YLRHGKLRP  | 442   | 450  | 9              | HLA-A*02:01 | 442           | 27             | 15937.85972   | 27         | 15937.85972 | 27          | TRUE         | TRUE              |
| 1     | RASANLAAT  | 1001  | 1009 | 9              | HLA-A*02:01 | 1001          | 27             | 15937.85972   | 27         | 15937.85972 | 27          | TRUE         | TRUE              |
| 1     | VSATKLNDL  | 369   | 377  | 9              | HLA-A*02:01 | 369           | 27             | 16011.42554   | 27         | 16011.42554 | 27          | TRUE         | TRUE              |
| 1     | SOERNFTTA  | 1052  | 1060 | 9              | HLA-A*02:01 | 1052          | 27             | 16085.33092   | 27         | 16085.33092 | 27          | TRUE         | TRUE              |
| 1     | NLCPPGEVF  | 321   | 329  | 9              | HLA-A*02:01 | 321           | 28             | 16309.10016   | 28         | 16309.10016 | 28          | TRUE         | TRUE              |
| 1     | DLFLPFYSN  | 57    | 65   | 9              | HLA-A*02:01 | 57            | 28             | 16346.69652   | 28         | 16346.69652 | 28          | TRUE         | TRUE              |
| 1     | FELLNAPAT  | 501   | 509  | 9              | HLA-A*02:01 | 501           | 28             | 16460.00641   | 28         | 16460.00641 | 28          | TRUE         | TRUE              |
| 1     | LKYDENGTI  | 264   | 272  | 9              | HLA-A*02:01 | 264           | 28             | 16921.15486   | 28         | 16921.15486 | 28          | TRUE         | TRUE              |
| 1     | YSNVTGFHT  | 63    | 71   | 9              | HLA-A*02:01 | 63            | 28             | 16999.25936   | 28         | 16999.25936 | 28          | TRUE         | TRUE              |
| 1     | KYFGGFNFS  | 777   | 785  | 9              | HLA-A*02:01 | 777           | 28             | 17077.72437   | 28         | 17077.72437 | 28          | TRUE         | TRUE              |
| 1     | VVLISFELLN | 497   | 505  | 9              | HLA-A*02:01 | 497           | 28             | 17117.0926    | 28         | 17117.0926  | 28          | TRUE         | TRUE              |
| 1     | INARDLICA  | 826   | 834  | 9              | HLA-A*02:01 | 826           | 28             | 17156.55157   | 28         | 17156.55157 | 28          | TRUE         | TRUE              |
| 1     | LSFELLNAP  | 499   | 507  | 9              | HLA-A*02:01 | 499           | 28             | 17235.74261   | 28         | 17235.74261 | 28          | TRUE         | TRUE              |
| 1     | TNLCPPGEV  | 320   | 328  | 9              | HLA-A*02:01 | 320           | 28             | 17235.74261   | 28         | 17235.74261 | 28          | TRUE         | TRUE              |
| 1     | WVFGSTMNN  | 101   | 109  | 9              | HLA-A*02:01 | 101           | 28             | 17435.32311   | 28         | 17435.32311 | 28          | TRUE         | TRUE              |
| 1     | TLVKQLSSN  | 943   | 951  | 9              | HLA-A*02:01 | 943           | 29             | 17515.8009    | 29         | 17515.8009  | 29          | TRUE         | TRUE              |
| 1     | SSIAYSNNT  | 685   | 693  | 9              | HLA-A*02:01 | 685           | 29             | 17882.57273   | 29         | 17882.57273 | 29          | TRUE         | TRUE              |
| 1     | ITNFRALIT  | 228   | 236  | 9              | HLA-A*02:01 | 228           | 29             | 18006.5288    | 29         | 18006.5288  | 29          | TRUE         | TRUE              |
| 1     | PVSMAKTSV  | 710   | 718  | 9              | HLA-A*02:01 | 710           | 29             | 18048.03814   | 29         | 18048.03814 | 29          | TRUE         | TRUE              |
| 1     | AGICASYHT  | 654   | 662  | 9              | HLA-A*02:01 | 654           | 29             | 18173.14116   | 29         | 18173.14116 | 29          | TRUE         | TRUE              |
| 1     | FPSVYAWER  | 334   | 342  | 9              | HLA-A*02:01 | 334           | 29             | 18341.29517   | 29         | 18341.29517 | 29          | TRUE         | TRUE              |
| 1     | YFGGFNFSS  | 778   | 786  | 9              | HLA-A*02:01 | 778           | 29             | 18511.00508   | 29         | 18511.00508 | 29          | TRUE         | TRUE              |
| 1     | GTNASSEVA  | 587   | 595  | 9              | HLA-A*02:01 | 587           | 29             | 18596.448     | 29         | 18596.448   | 29          | TRUE         | TRUE              |
| 1     | IAGLIAIWM  | 1203  | 1211 | 9              | HLA-A*02:01 | 1203          | 29             | 18639.31724   | 29         | 18639.31724 | 29          | TRUE         | TRUE              |
| 1     | TTFDDVQAP  | 20    | 28   | 9              | HLA-A*02:01 | 20            | 29             | 18725.35242   | 29         | 18725.35242 | 29          | TRUE         | TRUE              |
| 1     | VSGNCDVVI  | 1104  | 1112 | 9              | HLA-A*02:01 | 1104          | 29             | 18725.35242   | 29         | 18725.35242 | 29          | TRUE         | TRUE              |
| 1     | IANQFNKAI  | 905   | 913  | 9              | HLA-A*02:01 | 905           | 29             | 18768.51881   | 29         | 18768.51881 | 29          | TRUE         | TRUE              |
| 1     | PFKDGIIYA  | 82    | 90   | 9              | HLA-A*02:01 | 82            | 29             | 18942.18178   | 29         | 18942.18178 | 29          | TRUE         | TRUE              |
| 1     | KSNVVRGWV  | 94    | 102  | 9              | HLA-A*02:01 | 94            | 29             | 19029.61492   | 29         | 19029.61492 | 29          | TRUE         | TRUE              |
| 1     | TNASSEVAV  | 588   | 596  | 9              | HLA-A*02:01 | 588           | 29             | 19029.61492   | 29         | 19029.61492 | 29          | TRUE         | TRUE              |
| 1     | SPAQDIWGT  | 239   | 247  | 9              | HLA-A*02:01 | 239           | 29             | 19117.45163   | 29         | 19117.45163 | 29          | TRUE         | TRUE              |
| 1     | IVAYTMSLG  | 674   | 682  | 9              | HLA-A*02:01 | 674           | 29             | 19205.69378   | 29         | 19205.69378 | 29          | TRUE         | TRUE              |
| 1     | IINNTVYDPL | 1115  | 1123 | 9              | HLA-A*02:01 | 1115          | 30             | 19698.35682   | 30         | 19698.35682 | 30          | TRUE         | TRUE              |
| 1     | ISSVLNDIL  | 955   | 963  | 9              | HLA-A*02:01 | 955           | 30             | 20018.42937   | 30         | 20018.42937 | 30          | TRUE         | TRUE              |
| 1     | FFSTFKCYG  | 360   | 368  | 9              | HLA-A*02:01 | 360           | 30             | 20018.42937   | 30         | 20018.42937 | 30          | TRUE         | TRUE              |
| 1     | NITNLCPFG  | 318   | 326  | 9              | HLA-A*02:01 | 318           | 30             | 20018.42937   | 30         | 20018.42937 | 30          | TRUE         | TRUE              |
| 1     | NSTNVVIRA  | 119   | 127  | 9              | HLA-A*02:01 | 119           | 30             | 20018.42937   | 30         | 20018.42937 | 30          | TRUE         | TRUE              |
| 1     | FGNPVPIFK  | 76    | 84   | 9              | HLA-A*02:01 | 76            | 30             | 20157.19049   | 30         | 20157.19049 | 30          | TRUE         | TRUE              |
| 1     | QYGSFCTQL  | 737   | 745  | 9              | HLA-A*02:01 | 737           | 30             | 20484.71849   | 30         | 20484.71849 | 30          | TRUE         | TRUE              |
| 1     | FCTQLNRAL  | 741   | 749  | 9              | HLA-A*02:01 | 741           | 30             | 20626.71177   | 30         | 20626.71177 | 30          | TRUE         | TRUE              |
| 1     | ICAQKFNGL  | 832   | 840  | 9              | HLA-A*02:01 | 832           | 30             | 20913.65792   | 30         | 20913.65792 | 30          | TRUE         | TRUE              |
| 1     | MTSCSCCLK  | 1219  | 1227 | 9              | HLA-A*02:01 | 1219          | 30             | 20961.86888   | 30         | 20961.86888 | 30          | TRUE         | TRUE              |
| 1     | LNDDGYFTT  | 478   | 486  | 9              | HLA-A*02:01 | 478           | 30             | 21107.16961   | 30         | 21107.16961 | 30          | TRUE         | TRUE              |
| 1     | EVAVLYQDV  | 593   | 601  | 9              | HLA-A*02:01 | 593           | 30             | 21155.82666   | 30         | 21155.82666 | 30          | TRUE         | TRUE              |
| 1     | YSLVYNSTF  | 352   | 360  | 9              | HLA-A*02:01 | 352           | 30             | 21204.59588   | 30         | 21204.59588 | 30          | TRUE         | TRUE              |
| 1     | VFLHVTYVP  | 1043  | 1051 | 9              | HLA-A*02:01 | 1043          | 31             | 21253.47752   | 31         | 21253.47752 | 31          | TRUE         | TRUE              |
| 1     | KAISQIQES  | 911   | 919  | 9              | HLA-A*02:01 | 911           | 31             | 22203.93769   | 31         | 22203.93769 | 31          | TRUE         | TRUE              |
| 1     | FPREGVVFV  | 1071  | 1079 | 9              | HLA-A*02:01 | 1071          | 31             | 22512.82524   | 31         | 22512.82524 | 31          | TRUE         | TRUE              |
| 1     | GYLKPTTFM  | 255   | 263  | 9              | HLA-A*02:01 | 255           | 31             | 22512.82524   | 31         | 22512.82524 | 31          | TRUE         | TRUE              |
| 1     | SAAAYFVGY  | 248   | 256  | 9              | HLA-A*02:01 | 248           | 31             | 22564.72266   | 31         | 22564.72266 | 31          | TRUE         | TRUE              |
| 1     | GKPCPTPAL  | 464   | 472  | 9              | HLA-A*02:01 | 464           | 31             | 22616.73972   | 31         | 22616.73972 | 31          | TRUE         | TRUE              |
| 1     | YKLPDFDMQ  | 410   | 418  | 9              | HLA-A*02:01 | 410           | 31             | 22773.51147   | 31         | 22773.51147 | 31          | TRUE         | TRUE              |
| 1     | LQYGSFCTQ  | 736   | 744  | 9              | HLA-A*02:01 | 736           | 31             | 22773.51147   | 31         | 22773.51147 | 31          | TRUE         | TRUE              |
| 1     | PVPIPKDGI  | 79    | 87   | 9              | HLA-A*02:01 | 79            | 31             | 22878.62922   | 31         | 22878.62922 | 31          | TRUE         | TRUE              |
| 1     | AMQMAYRFN  | 881   | 889  | 9              | HLA-A*02:01 | 881           | 31             | 22984.23217   | 31         | 22984.23217 | 31          | TRUE         | TRUE              |
| 1     | FKCYGVSAT  | 364   | 372  | 9              | HLA-A*02:01 | 364           | 31             | 23250.37704   | 31         | 23250.37704 | 31          | TRUE         | TRUE              |
| 1     | SFCTQLNRN  | 740   | 748  | 9              | HLA-A*02:01 | 740           | 31             | 23411.54095   | 31         | 23411.54095 | 31          | TRUE         | TRUE              |
| 1     | CVLAWNTRN  | 419   | 427  | 9              | HLA-A*02:01 | 419           | 31             | 23465.51013   | 31         | 23465.51013 | 31          | TRUE         | TRUE              |
| 1     | KISNCVADY  | 344   | 352  | 9              | HLA-A*02:01 | 344           | 32             | 23682.63382   | 32         | 23682.63382 | 32          | TRUE         | TRUE              |
| 1     | LKPIFLKPL  | 216   | 224  | 9              | HLA-A*02:01 | 216           | 32             | 23956.8658    | 32         | 23956.8658  | 32          | TRUE         | TRUE              |
| 1     | NFGAISVVL  | 951   | 959  | 9              | HLA-A*02:01 | 951           | 32             | 24067.44566   | 32         | 24067.44566 | 32          | TRUE         | TRUE              |
| 1     | VLTPTSSKRF | 537   | 545  | 9              | HLA-A*02:01 | 537           | 32             | 24122.9269    | 32         | 24122.9269  | 32          | TRUE         | TRUE              |
| 1     | SFELLNAPA  | 500   | 508  | 9              | HLA-A*02:01 | 500           | 32             | 24178.5359    | 32         | 24178.5359  | 32          | TRUE         | TRUE              |
| 1     | VITPGTNAS  | 583   | 591  | 9              | HLA-A*02:01 | 583           | 32             | 24290.139     | 32         | 24290.139   | 32          | TRUE         | TRUE              |
| 1     | FGRDVSDFI  | 551   | 559  | 9              | HLA-A*02:01 | 551           | 32             | 24798.76197   | 32         | 24798.76197 | 32          | TRUE         | TRUE              |
| 1     | GIYQTSNFR  | 298   | 306  | 9              | HLA-A*02:01 | 298           | 32             | 25143.74711   | 32         | 25143.74711 | 32          | TRUE         | TRUE              |
| 1     | NCTDVSITAI | 602   | 610  | 9              | HLA-A*02:01 | 602           | 32             | 25143.74711   | 32         | 25143.74711 | 32          | TRUE         | TRUE              |
| 1     | ATKFPVSYYA | 331   | 339  | 9              | HLA-A*02:01 | 331           | 32             | 25259.80537   | 32         | 25259.80537 | 32          | TRUE         | TRUE              |
| 1     | TITDAVDCS  | 271   | 279  | 9              | HLA-A*02:01 | 271           | 32             | 25259.80537   | 32         | 25259.80537 | 32          | TRUE         | TRUE              |
| 1     | YQPIDVVRD  | 200   | 208  | 9              | HLA-A*02:01 | 200           | 32             | 25376.39934   | 32         | 25376.39934 | 32          | TRUE         | TRUE              |
| 1     | IAPGQTGVI  | 397   | 405  | 9              | HLA-A*02:01 | 397           | 32             | 25434.89798   | 32         | 25434.89798 | 32          | TRUE         | TRUE              |
| 1     | FNGTSWFTI  | 1079  | 1087 | 9              | HLA-A*02:01 | 1079          | 32             | 25670.24419   | 32         | 25670.24419 | 32          | TRUE         | TRUE              |
| 1     | HTINHTFGN  | 70    | 78   | 9              | HLA-A*02:01 | 70            | 33             | 26818.22314   | 33         | 26818.22314 | 33          | TRUE         | TRUE              |
| 1     | TPAWRIYST  | 616   | 624  | 9              | HLA-A*02:01 | 616           | 33             | 26818.22314   | 33         | 26818.22314 | 33          | TRUE         |                   |

| seq # | peptide    | start | end  | peptide length | allele      | peptide index | median binding | smmpmbec IC50 | smmpmbec p | legacy IC50 | legacy rank | scores equal | percentiles equal |
|-------|------------|-------|------|----------------|-------------|---------------|----------------|---------------|------------|-------------|-------------|--------------|-------------------|
| 1     | GIWFAATEK  | 86    | 94   | 9              | HLA-A*02:01 | 86            | 34             | 28538.42492   | 34         | 28538.42492 | 34          | TRUE         | TRUE              |
| 1     | ESLIDLOEL  | 1177  | 1185 | 9              | HLA-A*02:01 | 1177          | 34             | 28802.48771   | 34         | 28802.48771 | 34          | TRUE         | TRUE              |
| 1     | VAKNNLNE   | 1171  | 1179 | 9              | HLA-A*02:01 | 1171          | 34             | 29337.96594   | 34         | 29337.96594 | 34          | TRUE         | TRUE              |
| 1     | SOSWIINN   | 111   | 119  | 9              | HLA-A*02:01 | 111           | 34             | 29541.327     | 34         | 29541.327   | 34          | TRUE         | TRUE              |
| 1     | GVIADYNYK  | 403   | 411  | 9              | HLA-A*02:01 | 403           | 34             | 29609.42679   | 34         | 29609.42679 | 34          | TRUE         | TRUE              |
| 1     | CDIPIGAGI  | 648   | 656  | 9              | HLA-A*02:01 | 648           | 34             | 29677.68357   | 34         | 29677.68357 | 34          | TRUE         | TRUE              |
| 1     | TDLIKNGCV  | 517   | 525  | 9              | HLA-A*02:01 | 517           | 34             | 29746.0977    | 34         | 29746.0977  | 34          | TRUE         | TRUE              |
| 1     | YEYQKWVWP  | 1188  | 1196 | 9              | HLA-A*02:01 | 1188          | 34             | 29746.0977    | 34         | 29746.0977  | 34          | TRUE         | TRUE              |
| 1     | YWPLNDYGF  | 475   | 483  | 9              | HLA-A*02:01 | 475           | 34             | 29883.39945   | 34         | 29883.39945 | 34          | TRUE         | TRUE              |
| 1     | IPIGAGICA  | 650   | 658  | 9              | HLA-A*02:01 | 650           | 34             | 30090.54128   | 34         | 30090.54128 | 34          | TRUE         | TRUE              |
| 1     | IGQSKRVDFC | 1017  | 1025 | 9              | HLA-A*02:01 | 1017          | 34             | 30159.90714   | 34         | 30159.90714 | 34          | TRUE         | TRUE              |
| 1     | DISPSCFSGG | 572   | 580  | 9              | HLA-A*02:01 | 572           | 34             | 30299.11894   | 34         | 30299.11894 | 34          | TRUE         | TRUE              |
| 1     | TLTSGSDLD  | 9     | 17   | 9              | HLA-A*02:01 | 9             | 34             | 30299.11894   | 34         | 30299.11894 | 34          | TRUE         | TRUE              |
| 1     | OFNKAISQI  | 908   | 916  | 9              | HLA-A*02:01 | 908           | 34             | 30368.96563   | 34         | 30368.96563 | 34          | TRUE         | TRUE              |
| 1     | QILPDPLKP  | 786   | 794  | 9              | HLA-A*02:01 | 786           | 34             | 30438.97332   | 34         | 30438.97332 | 34          | TRUE         | TRUE              |
| 1     | KTPTLKYFG  | 772   | 780  | 9              | HLA-A*02:01 | 772           | 34             | 30509.1424    | 34         | 30509.1424  | 34          | TRUE         | TRUE              |
| 1     | HTMIFDNFA  | 149   | 157  | 9              | HLA-A*02:01 | 149           | 34             | 30720.62167   | 34         | 30720.62167 | 34          | TRUE         | TRUE              |
| 1     | ITQRNFSSP  | 1086  | 1094 | 9              | HLA-A*02:01 | 1086          | 35             | 30933.56685   | 35         | 30933.56685 | 35          | TRUE         | TRUE              |
| 1     | TAALVSGTA  | 856   | 864  | 9              | HLA-A*02:01 | 856           | 35             | 31291.76067   | 35         | 31291.76067 | 35          | TRUE         | TRUE              |
| 1     | LICAQKFN   | 831   | 839  | 9              | HLA-A*02:01 | 831           | 35             | 31873.51794   | 35         | 31873.51794 | 35          | TRUE         | TRUE              |
| 1     | AVLYQDVNC  | 595   | 603  | 9              | HLA-A*02:01 | 595           | 35             | 31946.994     | 35         | 31946.994   | 35          | TRUE         | TRUE              |
| 1     | INITNFRAI  | 226   | 234  | 9              | HLA-A*02:01 | 226           | 35             | 32020.63941   | 35         | 32020.63941 | 35          | TRUE         | TRUE              |
| 1     | YNYKRYRLR  | 436   | 444  | 9              | HLA-A*02:01 | 436           | 35             | 32168.43997   | 35         | 32168.43997 | 35          | TRUE         | TRUE              |
| 1     | DLDRCTTFD  | 15    | 23   | 9              | HLA-A*02:01 | 15            | 35             | 32242.59588   | 35         | 32242.59588 | 35          | TRUE         | TRUE              |
| 1     | QDWGTSAA   | 242   | 250  | 9              | HLA-A*02:01 | 242           | 35             | 32242.59588   | 35         | 32242.59588 | 35          | TRUE         | TRUE              |
| 1     | GTSWFITQR  | 1081  | 1089 | 9              | HLA-A*02:01 | 1081          | 35             | 32466.09088   | 35         | 32466.09088 | 35          | TRUE         | TRUE              |
| 1     | CTTFDDVQA  | 19    | 27   | 9              | HLA-A*02:01 | 19            | 35             | 32917.73919   | 35         | 32917.73919 | 35          | TRUE         | TRUE              |
| 1     | LTVLPLLT   | 840   | 848  | 9              | HLA-A*02:01 | 840           | 35             | 32917.73919   | 35         | 32917.73919 | 35          | TRUE         | TRUE              |
| 1     | VDCSQNPILA | 276   | 284  | 9              | HLA-A*02:01 | 276           | 35             | 33069.68057   | 35         | 33069.68057 | 35          | TRUE         | TRUE              |
| 1     | IFDNANFCT  | 152   | 160  | 9              | HLA-A*02:01 | 152           | 35             | 33222.32328   | 35         | 33222.32328 | 35          | TRUE         | TRUE              |
| 1     | MCGVLAWNT  | 417   | 425  | 9              | HLA-A*02:01 | 417           | 35             | 33452.60943   | 35         | 33452.60943 | 35          | TRUE         | TRUE              |
| 1     | GVVFVNGTS  | 1075  | 1083 | 9              | HLA-A*02:01 | 1075          | 35             | 33452.60943   | 35         | 33452.60943 | 35          | TRUE         | TRUE              |
| 1     | HTVSLRST   | 661   | 669  | 9              | HLA-A*02:01 | 661           | 36             | 33839.97239   | 36         | 33839.97239 | 36          | TRUE         | TRUE              |
| 1     | IGYQPYRVV  | 489   | 497  | 9              | HLA-A*02:01 | 489           | 36             | 33839.97239   | 36         | 33839.97239 | 36          | TRUE         | TRUE              |
| 1     | ICGDSSTCA  | 724   | 732  | 9              | HLA-A*02:01 | 724           | 36             | 33917.98158   | 36         | 33917.98158 | 36          | TRUE         | TRUE              |
| 1     | RAILTAFSP  | 232   | 240  | 9              | HLA-A*02:01 | 232           | 36             | 34153.0898    | 36         | 34153.0898  | 36          | TRUE         | TRUE              |
| 1     | VRDPKTSI   | 562   | 570  | 9              | HLA-A*02:01 | 562           | 36             | 34310.7333    | 36         | 34310.7333  | 36          | TRUE         | TRUE              |
| 1     | VKGGDVRQI  | 389   | 397  | 9              | HLA-A*02:01 | 389           | 36             | 34310.7333    | 36         | 34310.7333  | 36          | TRUE         | TRUE              |
| 1     | ALQIPFAMQ  | 875   | 883  | 9              | HLA-A*02:01 | 875           | 36             | 34389.82771   | 36         | 34389.82771 | 36          | TRUE         | TRUE              |
| 1     | KPMGTQHT   | 142   | 150  | 9              | HLA-A*02:01 | 142           | 36             | 34469.10445   | 36         | 34469.10445 | 36          | TRUE         | TRUE              |
| 1     | NVFTQAGC   | 627   | 635  | 9              | HLA-A*02:01 | 627           | 36             | 35029.18234   | 36         | 35029.18234 | 36          | TRUE         | TRUE              |
| 1     | YTTTIGYGY  | 484   | 492  | 9              | HLA-A*02:01 | 484           | 36             | 35598.36076   | 36         | 35598.36076 | 36          | TRUE         | TRUE              |
| 1     | LLRSTQKS   | 665   | 673  | 9              | HLA-A*02:01 | 665           | 36             | 35845.11681   | 36         | 35845.11681 | 36          | TRUE         | TRUE              |
| 1     | DTLYLTDL   | 50    | 58   | 9              | HLA-A*02:01 | 50            | 36             | 36260.1837    | 36         | 36260.1837  | 36          | TRUE         | TRUE              |
| 1     | QPIDVVRDL  | 201   | 209  | 9              | HLA-A*02:01 | 201           | 36             | 36260.1837    | 36         | 36260.1837  | 36          | TRUE         | TRUE              |
| 1     | LQPELDSFK  | 1123  | 1131 | 9              | HLA-A*02:01 | 1123          | 36             | 36343.77206   | 36         | 36343.77206 | 36          | TRUE         | TRUE              |
| 1     | RGWVFGSTM  | 99    | 107  | 9              | HLA-A*02:01 | 99            | 36             | 36511.52729   | 36         | 36511.52729 | 36          | TRUE         | TRUE              |
| 1     | FDNANFCTF  | 153   | 161  | 9              | HLA-A*02:01 | 153           | 36             | 36849.36429   | 36         | 36849.36429 | 36          | TRUE         | TRUE              |
| 1     | IRASANLAA  | 1000  | 1008 | 9              | HLA-A*02:01 | 1000          | 36             | 36849.36429   | 36         | 36849.36429 | 36          | TRUE         | TRUE              |
| 1     | YRFNGIVGT  | 886   | 894  | 9              | HLA-A*02:01 | 886           | 36             | 36849.36429   | 36         | 36849.36429 | 36          | TRUE         | TRUE              |
| 1     | VADYSVLVN  | 349   | 357  | 9              | HLA-A*02:01 | 349           | 37             | 37190.32726   | 37         | 37190.32726 | 37          | TRUE         | TRUE              |
| 1     | VVRDLPSCG  | 205   | 213  | 9              | HLA-A*02:01 | 205           | 37             | 37276.05982   | 37         | 37276.05982 | 37          | TRUE         | TRUE              |
| 1     | LAATKMSEC  | 1006  | 1014 | 9              | HLA-A*02:01 | 1006          | 37             | 37448.11829   | 37         | 37448.11829 | 37          | TRUE         | TRUE              |
| 1     | NTIAIPTNF  | 692   | 700  | 9              | HLA-A*02:01 | 692           | 37             | 37620.97095   | 37         | 37620.97095 | 37          | TRUE         | TRUE              |
| 1     | TKFPSVVAW  | 332   | 340  | 9              | HLA-A*02:01 | 332           | 37             | 37881.74707   | 37         | 37881.74707 | 37          | TRUE         | TRUE              |
| 1     | QDLFLPFYS  | 56    | 64   | 9              | HLA-A*02:01 | 56            | 37             | 38320.39702   | 37         | 38320.39702 | 37          | TRUE         | TRUE              |
| 1     | RNFFSPQII  | 1089  | 1097 | 9              | HLA-A*02:01 | 1089          | 37             | 38853.48685   | 37         | 38853.48685 | 37          | TRUE         | TRUE              |
| 1     | WPWVYWLGF  | 1194  | 1202 | 9              | HLA-A*02:01 | 1194          | 37             | 39032.8264    | 37         | 39032.8264  | 37          | TRUE         | TRUE              |
| 1     | CYWPPLNDY  | 474   | 482  | 9              | HLA-A*02:01 | 474           | 37             | 39303.38902   | 37         | 39303.38902 | 37          | TRUE         | TRUE              |
| 1     | TAFSPAQDI  | 236   | 244  | 9              | HLA-A*02:01 | 236           | 37             | 39303.38902   | 37         | 39303.38902 | 37          | TRUE         | TRUE              |
| 1     | FRAILTAFS  | 231   | 239  | 9              | HLA-A*02:01 | 231           | 37             | 39303.38902   | 37         | 39303.38902 | 37          | TRUE         | TRUE              |
| 1     | RSTSQKIV   | 667   | 675  | 9              | HLA-A*02:01 | 667           | 37             | 39484.80522   | 37         | 39484.80522 | 37          | TRUE         | TRUE              |
| 1     | INNNTNVVI  | 117   | 125  | 9              | HLA-A*02:01 | 117           | 37             | 39484.80522   | 37         | 39484.80522 | 37          | TRUE         | TRUE              |
| 1     | LFLTITSGS  | 6     | 14   | 9              | HLA-A*02:01 | 6             | 37             | 39667.0588    | 37         | 39667.0588  | 37          | TRUE         | TRUE              |
| 1     | EIDRLNEVA  | 1164  | 1172 | 9              | HLA-A*02:01 | 1164          | 37             | 40126.3817    | 37         | 40126.3817  | 37          | TRUE         | TRUE              |
| 1     | NGNAQALNT  | 935   | 943  | 9              | HLA-A*02:01 | 935           | 38             | 40497.66653   | 38         | 40497.66653 | 38          | TRUE         | TRUE              |
| 1     | AIHAQDLTP  | 609   | 617  | 9              | HLA-A*02:01 | 609           | 38             | 40591.0233    | 38         | 40591.0233  | 38          | TRUE         | TRUE              |
| 1     | PLQPELDSF  | 1122  | 1130 | 9              | HLA-A*02:01 | 1122          | 38             | 40591.0233    | 38         | 40591.0233  | 38          | TRUE         | TRUE              |
| 1     | FEYISDAFS  | 161   | 169  | 9              | HLA-A*02:01 | 161           | 38             | 40684.59527   | 38         | 40684.59527 | 38          | TRUE         | TRUE              |
| 1     | STGNVNYKY  | 432   | 440  | 9              | HLA-A*02:01 | 432           | 38             | 40778.38295   | 38         | 40778.38295 | 38          | TRUE         | TRUE              |
| 1     | DISNVFPSP  | 454   | 462  | 9              | HLA-A*02:01 | 454           | 38             | 40778.38295   | 38         | 40778.38295 | 38          | TRUE         | TRUE              |
| 1     | AWNTRNIDA  | 422   | 430  | 9              | HLA-A*02:01 | 422           | 38             | 40966.60741   | 38         | 40966.60741 | 38          | TRUE         | TRUE              |
| 1     | QYGECLGDI  | 818   | 826  | 9              | HLA-A*02:01 | 818           | 38             | 41155.7007    | 38         | 41155.7007  | 38          | TRUE         | TRUE              |
| 1     | FTDSVRDPK  | 558   | 566  | 9              | HLA-A*02:01 | 558           | 38             | 41440.97837   | 38         | 41440.97837 | 38          | TRUE         | TRUE              |
| 1     | TIAPITNFS  | 693   | 701  | 9              | HLA-A*02:01 | 693           | 38             | 41824.42702   | 38         | 41824.42702 | 38          | TRUE         | TRUE              |
| 1     | DSTECANLL  | 727   | 735  | 9              | HLA-A*02:01 | 727           | 38             | 42017.4798    | 38         | 42017.4798  | 38          | TRUE         | TRUE              |
| 1     | AAYFVGYLK  | 250   | 258  | 9              | HLA-A*02:01 | 250           | 38             | 42406.26276   | 38         | 42406.26276 | 38          | TRUE         | TRUE              |
| 1     | QIDRLITGR  | 974   | 982  | 9              | HLA-A*02:01 | 974           | 38             | 42504.01929   | 38         | 42504.01929 | 38          | TRUE         | TRUE              |
| 1     | ATKMECVL   | 1008  | 1016 | 9              | HLA-A*02:01 | 1008          | 38             | 42700.20893   | 38         | 42700.20893 | 38          | TRUE         | TRUE              |
| 1     | LVSIGTATAG | 859   | 867  | 9              | HLA-A*02:01 | 859           | 38             | 42700.20893   | 38         | 42700.20893 | 38          | TRUE         | TRUE              |
| 1     | FEIDKGIYQ  | 293   | 301  | 9              | HLA-A*02:01 | 293           | 38             | 42897.30414   | 38         | 42897.30414 | 38          | TRUE         | TRUE              |
| 1     | NLAATKMSE  | 1005  | 1013 | 9              | HLA-A*02:01 | 1005          | 38             | 43194.65405   | 38         | 43194.65405 | 38          | TRUE         | TRUE              |
| 1     | TNFSISITT  | 698   | 706  | 9              | HLA-A*02:01 | 698           | 38             | 43997.70262   | 38         | 43997.70262 | 38          | TRUE         | TRUE              |
| 1     | TVYDPLQPE  | 1118  | 1126 | 9              | HLA-A*02:01 | 1118          | 38             | 43997.70262   | 38         | 43997.70262 | 38          | TRUE         | TRUE              |
| 1     | YNSTFFSTF  | 356   | 364  | 9              | HLA-A*02:01 | 356           | 38             | 44099.1278    | 38         | 44099.1278  | 38          | TRUE         | TRUE              |
| 1     | AIPTNFIS   | 695   | 703  | 9              | HLA-A*02:01 | 695           | 39             | 44712.60778   | 39         | 44712.60778 | 39          | TRUE         | TRUE              |
| 1     | KGDDVRQIA  | 390   | 398  | 9              | HLA-A*02:01 | 390           | 39             | 44815.68098   | 39         | 44815.68098 | 39          | TRUE         | TRUE              |
| 1     | QLIRAAEIR  | 993   | 1001 | 9              | HLA-A*02:01 | 993           | 39             | 44918.9918    | 39         | 44918.9918  | 39          | TRUE         | TRUE              |
| 1     | LGFIAGLIA  | 1200  | 1208 | 9              | HLA-A*02:01 | 1200          | 39             | 45022.5408    | 39         | 45022.5408  | 39          | TRUE         | TRUE              |
| 1     | FAQVKQMYK  | 764   | 772  | 9              | HLA-A*02:01 | 764           | 39             | 45126.32844   | 39         | 45126.32844 | 39          | TRUE         | TRUE              |
| 1     | IQESLTTTTS | 916   | 924  | 9              | HLA-A*02:01 | 916           | 39             | 45334.6221    | 39         | 45334.6221  | 39          | TRUE         | TRUE              |
| 1     | SLDVSSEKSG | 169   | 177  | 9              | HLA-A*02:01 | 169           | 39             | 45543.87722   | 39         | 45543.87722 | 39          | TRUE         | TRUE              |
| 1     | TQLNRALSG  | 743   | 751  | 9              | HLA-A*02:01 | 743           | 39             | 46497.54249   | 39         | 46497.54249 | 39          | TRUE         | TRUE              |
| 1     | FVVKGGDVR  | 387   | 395  | 9              | HLA-A*02:01 | 387           | 39             | 46604.7304    | 39         | 46604.7304  | 39          |              |                   |

| seq # | peptide    | start | end  | peptide length | allele      | peptide index | median binding | smmpmbec IC <sub>50</sub> | smmpmbec p <sub>e</sub> | legacy IC <sub>50</sub> | legacy rank | scores equal | percentiles equal |
|-------|------------|-------|------|----------------|-------------|---------------|----------------|---------------------------|-------------------------|-------------------------|-------------|--------------|-------------------|
| 1     | DDMIAAYTA  | 849   | 857  | 9              | HLA-A*02:01 | 849           | 39             | 48913.6419                | 39                      | 48913.6419              | 39          | TRUE         | TRUE              |
| 1     | DVNVQNAQA  | 932   | 940  | 9              | HLA-A*02:01 | 932           | 40             | 49139.41704               | 40                      | 49139.41704             | 40          | TRUE         | TRUE              |
| 1     | YAWERKKIS  | 338   | 346  | 9              | HLA-A*02:01 | 338           | 40             | 49480.03521               | 40                      | 49480.03521             | 40          | TRUE         | TRUE              |
| 1     | RDISNVFVS  | 453   | 461  | 9              | HLA-A*02:01 | 453           | 40             | 50168.37107               | 40                      | 50168.37107             | 40          | TRUE         | TRUE              |
| 1     | NYNYKYRYL  | 435   | 443  | 9              | HLA-A*02:01 | 435           | 40             | 50399.93775               | 40                      | 50399.93775             | 40          | TRUE         | TRUE              |
| 1     | LIGAEHYDT  | 636   | 644  | 9              | HLA-A*02:01 | 636           | 40             | 50749.29342               | 40                      | 50749.29342             | 40          | TRUE         | TRUE              |
| 1     | FSPAQDIWG  | 238   | 246  | 9              | HLA-A*02:01 | 238           | 40             | 51811.95743               | 40                      | 51811.95743             | 40          | TRUE         | TRUE              |
| 1     | ATSTGNYNY  | 430   | 438  | 9              | HLA-A*02:01 | 430           | 40             | 52171.10076               | 40                      | 52171.10076             | 40          | TRUE         | TRUE              |
| 1     | QNAQALNTL  | 936   | 944  | 9              | HLA-A*02:01 | 936           | 40             | 52171.10076               | 40                      | 52171.10076             | 40          | TRUE         | TRUE              |
| 1     | NGLTGTGVL  | 530   | 538  | 9              | HLA-A*02:01 | 530           | 40             | 52171.10076               | 40                      | 52171.10076             | 40          | TRUE         | TRUE              |
| 1     | VFNATKFPS  | 328   | 336  | 9              | HLA-A*02:01 | 328           | 40             | 52291.36757               | 40                      | 52291.36757             | 40          | TRUE         | TRUE              |
| 1     | KRSFIEDLL  | 796   | 804  | 9              | HLA-A*02:01 | 796           | 40             | 52653.83401               | 40                      | 52653.83401             | 40          | TRUE         | TRUE              |
| 1     | KDGIYFAAT  | 84    | 92   | 9              | HLA-A*02:01 | 84            | 40             | 52775.21363               | 40                      | 52775.21363             | 40          | TRUE         | TRUE              |
| 1     | FNCTFEYIS  | 157   | 165  | 9              | HLA-A*02:01 | 157           | 41             | 54128.99952               | 41                      | 54128.99952             | 41          | TRUE         | TRUE              |
| 1     | LKGVKLHYT  | 1247  | 1255 | 9              | HLA-A*02:01 | 1247          | 41             | 54128.99952               | 41                      | 54128.99952             | 41          | TRUE         | TRUE              |
| 1     | PQAAHPGVV  | 1035  | 1043 | 9              | HLA-A*02:01 | 1035          | 41             | 54253.77975               | 41                      | 54253.77975             | 41          | TRUE         | TRUE              |
| 1     | SFVVKGDDV  | 386   | 394  | 9              | HLA-A*02:01 | 386           | 41             | 54755.7838                | 41                      | 54755.7838              | 41          | TRUE         | TRUE              |
| 1     | SCSCCLKGA  | 1221  | 1229 | 9              | HLA-A*02:01 | 1221          | 41             | 54882.00891               | 41                      | 54882.00891             | 41          | TRUE         | TRUE              |
| 1     | GDSTECANL  | 726   | 734  | 9              | HLA-A*02:01 | 726           | 41             | 55008.52501               | 41                      | 55008.52501             | 41          | TRUE         | TRUE              |
| 1     | YKYRYLRHG  | 438   | 446  | 9              | HLA-A*02:01 | 438           | 41             | 55135.33276               | 41                      | 55135.33276             | 41          | TRUE         | TRUE              |
| 1     | TFKCYGVSA  | 363   | 371  | 9              | HLA-A*02:01 | 363           | 41             | 55517.51262               | 41                      | 55517.51262             | 41          | TRUE         | TRUE              |
| 1     | ITNLCPFGE  | 319   | 327  | 9              | HLA-A*02:01 | 319           | 41             | 55645.49371               | 41                      | 55645.49371             | 41          | TRUE         | TRUE              |
| 1     | PLGINITNF  | 223   | 231  | 9              | HLA-A*02:01 | 223           | 41             | 55773.76982               | 41                      | 55773.76982             | 41          | TRUE         | TRUE              |
| 1     | ITPGTNASS  | 584   | 592  | 9              | HLA-A*02:01 | 584           | 41             | 56160.37512               | 41                      | 56160.37512             | 41          | TRUE         | TRUE              |
| 1     | AAYTAALVS  | 853   | 861  | 9              | HLA-A*02:01 | 853           | 41             | 56289.83816               | 41                      | 56289.83816             | 41          | TRUE         | TRUE              |
| 1     | EVMPVSMAK  | 707   | 715  | 9              | HLA-A*02:01 | 707           | 41             | 56419.59964               | 41                      | 56419.59964             | 41          | TRUE         | TRUE              |
| 1     | QIITTDNTF  | 1095  | 1103 | 9              | HLA-A*02:01 | 1095          | 41             | 56680.02068               | 41                      | 56680.02068             | 41          | TRUE         | TRUE              |
| 1     | GDVVRFPNI  | 311   | 319  | 9              | HLA-A*02:01 | 311           | 41             | 56810.68162               | 41                      | 56810.68162             | 41          | TRUE         | TRUE              |
| 1     | AALVSGTAT  | 857   | 865  | 9              | HLA-A*02:01 | 857           | 41             | 56810.68162               | 41                      | 56810.68162             | 41          | TRUE         | TRUE              |
| 1     | KFNGLTVLP  | 836   | 844  | 9              | HLA-A*02:01 | 836           | 42             | 57468.5183                | 42                      | 57468.5183              | 42          | TRUE         | TRUE              |
| 1     | TLKPIFKLP  | 215   | 223  | 9              | HLA-A*02:01 | 215           | 42             | 58000.26796               | 42                      | 58000.26796             | 42          | TRUE         | TRUE              |
| 1     | QAPNYTOHT  | 26    | 34   | 9              | HLA-A*02:01 | 26            | 42             | 58267.98503               | 42                      | 58267.98503             | 42          | TRUE         | TRUE              |
| 1     | TVLPLITD   | 841   | 849  | 9              | HLA-A*02:01 | 841           | 42             | 58536.93783               | 42                      | 58536.93783             | 42          | TRUE         | TRUE              |
| 1     | SFGGVSVIT  | 577   | 585  | 9              | HLA-A*02:01 | 577           | 42             | 58671.87941               | 42                      | 58671.87941             | 42          | TRUE         | TRUE              |
| 1     | VIHNNSTN   | 114   | 122  | 9              | HLA-A*02:01 | 114           | 42             | 58942.6965                | 42                      | 58942.6965              | 42          | TRUE         | TRUE              |
| 1     | VYYPEIFR   | 40    | 48   | 9              | HLA-A*02:01 | 40            | 42             | 59078.57345               | 42                      | 59078.57345             | 42          | TRUE         | TRUE              |
| 1     | SNNTIAIPT  | 690   | 698  | 9              | HLA-A*02:01 | 690           | 42             | 59488.08656               | 42                      | 59488.08656             | 42          | TRUE         | TRUE              |
| 1     | HADQLTPAW  | 611   | 619  | 9              | HLA-A*02:01 | 611           | 42             | 59900.43827               | 42                      | 59900.43827             | 42          | TRUE         | TRUE              |
| 1     | MMNKSQSVI  | 107   | 115  | 9              | HLA-A*02:01 | 107           | 42             | 60454.6902                | 42                      | 60454.6902              | 42          | TRUE         | TRUE              |
| 1     | SANLAATKM  | 1003  | 1011 | 9              | HLA-A*02:01 | 1003          | 42             | 60733.7364                | 42                      | 60733.7364              | 42          | TRUE         | TRUE              |
| 1     | MGTQTHMTI  | 144   | 152  | 9              | HLA-A*02:01 | 144           | 42             | 61014.07057               | 42                      | 61014.07057             | 42          | TRUE         | TRUE              |
| 1     | TGIGYQYPR  | 487   | 495  | 9              | HLA-A*02:01 | 487           | 42             | 61436.9999                | 42                      | 61436.9999              | 42          | TRUE         | TRUE              |
| 1     | QKSVWAYTM  | 671   | 679  | 9              | HLA-A*02:01 | 671           | 42             | 61862.86084               | 42                      | 61862.86084             | 42          | TRUE         | TRUE              |
| 1     | GTGVLTPSS  | 534   | 542  | 9              | HLA-A*02:01 | 534           | 42             | 62291.6737                | 42                      | 62291.6737              | 42          | TRUE         | TRUE              |
| 1     | TDDMIAAYT  | 848   | 856  | 9              | HLA-A*02:01 | 848           | 42             | 62435.27084               | 42                      | 62435.27084             | 42          | TRUE         | TRUE              |
| 1     | CLKGACSCG  | 1225  | 1233 | 9              | HLA-A*02:01 | 1225          | 42             | 62723.45896               | 42                      | 62723.45896             | 42          | TRUE         | TRUE              |
| 1     | GTQHTMIF   | 145   | 153  | 9              | HLA-A*02:01 | 145           | 42             | 63012.97729               | 42                      | 63012.97729             | 42          | TRUE         | TRUE              |
| 1     | KYDENGITIT | 265   | 273  | 9              | HLA-A*02:01 | 265           | 42             | 63303.83198               | 42                      | 63303.83198             | 42          | TRUE         | TRUE              |
| 1     | VDTSYECDI  | 642   | 650  | 9              | HLA-A*02:01 | 642           | 42             | 63449.76238               | 42                      | 63449.76238             | 42          | TRUE         | TRUE              |
| 1     | MSFFQAAPH  | 1032  | 1040 | 9              | HLA-A*02:01 | 1032          | 43             | 64036.8558                | 43                      | 64036.8558              | 43          | TRUE         | TRUE              |
| 1     | STFKCYGVS  | 362   | 370  | 9              | HLA-A*02:01 | 362           | 43             | 64184.476                 | 43                      | 64184.476               | 43          | TRUE         | TRUE              |
| 1     | RDLPVSFNT  | 207   | 215  | 9              | HLA-A*02:01 | 207           | 43             | 64629.38153               | 43                      | 64629.38153             | 43          | TRUE         | TRUE              |
| 1     | TTDPTFVSG  | 1098  | 1106 | 9              | HLA-A*02:01 | 1098          | 43             | 64778.36765               | 43                      | 64778.36765             | 43          | TRUE         | TRUE              |
| 1     | KGYHLMSPF  | 1027  | 1035 | 9              | HLA-A*02:01 | 1027          | 43             | 64927.69721               | 43                      | 64927.69721             | 43          | TRUE         | TRUE              |
| 1     | VYPSQERNF  | 1049  | 1057 | 9              | HLA-A*02:01 | 1049          | 43             | 65077.37101               | 43                      | 65077.37101             | 43          | TRUE         | TRUE              |
| 1     | EVFAQVKQM  | 762   | 770  | 9              | HLA-A*02:01 | 762           | 43             | 65227.38984               | 43                      | 65227.38984             | 43          | TRUE         | TRUE              |
| 1     | ISNCAVDYS  | 345   | 353  | 9              | HLA-A*02:01 | 345           | 43             | 65227.38984               | 43                      | 65227.38984             | 43          | TRUE         | TRUE              |
| 1     | KVTLADAGF  | 807   | 815  | 9              | HLA-A*02:01 | 807           | 43             | 65377.7545                | 43                      | 65377.7545              | 43          | TRUE         | TRUE              |
| 1     | VLKGVKLHY  | 1246  | 1254 | 9              | HLA-A*02:01 | 1246          | 43             | 66134.79322               | 43                      | 66134.79322             | 43          | TRUE         | TRUE              |
| 1     | YTOHTSMR   | 30    | 38   | 9              | HLA-A*02:01 | 30            | 43             | 66440.05756               | 43                      | 66440.05756             | 43          | TRUE         | TRUE              |
| 1     | FSPQITTD   | 1092  | 1100 | 9              | HLA-A*02:01 | 1092          | 43             | 66593.21771               | 43                      | 66593.21771             | 43          | TRUE         | TRUE              |
| 1     | TFDDVQAPN  | 21    | 29   | 9              | HLA-A*02:01 | 21            | 43             | 67054.81984               | 43                      | 67054.81984             | 43          | TRUE         | TRUE              |
| 1     | TDVSTAIHA  | 604   | 612  | 9              | HLA-A*02:01 | 604           | 43             | 67209.39716               | 43                      | 67209.39716             | 43          | TRUE         | TRUE              |
| 1     | NVVRGWVFG  | 96    | 104  | 9              | HLA-A*02:01 | 96            | 43             | 67519.62165               | 43                      | 67519.62165             | 43          | TRUE         | TRUE              |
| 1     | TQTHTMIFD  | 146   | 154  | 9              | HLA-A*02:01 | 146           | 43             | 67831.27806               | 43                      | 67831.27806             | 43          | TRUE         | TRUE              |
| 1     | LCFSNVYAD  | 377   | 385  | 9              | HLA-A*02:01 | 377           | 43             | 68144.37301               | 43                      | 68144.37301             | 43          | TRUE         | TRUE              |
| 1     | LGDISGINA  | 1148  | 1156 | 9              | HLA-A*02:01 | 1148          | 43             | 68301.46202               | 43                      | 68301.46202             | 43          | TRUE         | TRUE              |
| 1     | KFDEDDSEP  | 1237  | 1245 | 9              | HLA-A*02:01 | 1237          | 43             | 68458.91315               | 43                      | 68458.91315             | 43          | TRUE         | TRUE              |
| 1     | TTEVMPVSM  | 705   | 713  | 9              | HLA-A*02:01 | 705           | 43             | 68458.91315               | 43                      | 68458.91315             | 43          | TRUE         | TRUE              |
| 1     | NFKHLREFV  | 178   | 186  | 9              | HLA-A*02:01 | 178           | 44             | 69092.35567               | 44                      | 69092.35567             | 44          | TRUE         | TRUE              |
| 1     | LTITTSALG  | 920   | 928  | 9              | HLA-A*02:01 | 920           | 44             | 69411.2715                | 44                      | 69411.2715              | 44          | TRUE         | TRUE              |
| 1     | IPFKDGIYF  | 81    | 89   | 9              | HLA-A*02:01 | 81            | 44             | 70864.70768               | 44                      | 70864.70768             | 44          | TRUE         | TRUE              |
| 1     | DDFMGCVL   | 414   | 422  | 9              | HLA-A*02:01 | 414           | 44             | 71191.80431               | 44                      | 71191.80431             | 44          | TRUE         | TRUE              |
| 1     | IAAEDQRNT  | 752   | 760  | 9              | HLA-A*02:01 | 752           | 44             | 71850.53397               | 44                      | 71850.53397             | 44          | TRUE         | TRUE              |
| 1     | DFCGKGYYL  | 1023  | 1031 | 9              | HLA-A*02:01 | 1023          | 44             | 72016.1666                | 44                      | 72016.1666              | 44          | TRUE         | TRUE              |
| 1     | TKLNDLCFS  | 372   | 380  | 9              | HLA-A*02:01 | 372           | 44             | 72016.16655               | 44                      | 72016.16655             | 44          | TRUE         | TRUE              |
| 1     | NQFNKAISQ  | 907   | 915  | 9              | HLA-A*02:01 | 907           | 44             | 72682.52394               | 44                      | 72682.52394             | 44          | TRUE         | TRUE              |
| 1     | RALSGLIAE  | 747   | 755  | 9              | HLA-A*02:01 | 747           | 44             | 73018.01123               | 44                      | 73018.01123             | 44          | TRUE         | TRUE              |
| 1     | HTFGNPVPI  | 74    | 82   | 9              | HLA-A*02:01 | 74            | 44             | 73186.33513               | 44                      | 73186.33513             | 44          | TRUE         | TRUE              |
| 1     | IGAELHVDTS | 637   | 645  | 9              | HLA-A*02:01 | 637           | 44             | 74033.79295               | 44                      | 74033.79295             | 44          | TRUE         | TRUE              |
| 1     | TAPACHIEG  | 1059  | 1067 | 9              | HLA-A*02:01 | 1059          | 45             | 75584.0223                | 45                      | 75584.0223              | 45          | TRUE         | TRUE              |
| 1     | VNFMFNGLT  | 525   | 533  | 9              | HLA-A*02:01 | 525           | 45             | 75758.26151               | 45                      | 75758.26151             | 45          | TRUE         | TRUE              |
| 1     | QRNFSPQOI  | 1088  | 1096 | 9              | HLA-A*02:01 | 1088          | 45             | 77522.89811               | 45                      | 77522.89811             | 45          | TRUE         | TRUE              |
| 1     | STMMNKSQS  | 105   | 113  | 9              | HLA-A*02:01 | 105           | 45             | 77701.60685               | 45                      | 77701.60685             | 45          | TRUE         | TRUE              |
| 1     | NIDATSTGN  | 427   | 435  | 9              | HLA-A*02:01 | 427           | 45             | 77880.72755               | 45                      | 77880.72755             | 45          | TRUE         | TRUE              |
| 1     | NFFSPQIIT  | 1090  | 1098 | 9              | HLA-A*02:01 | 1090          | 45             | 78240.20866               | 45                      | 78240.20866             | 45          | TRUE         | TRUE              |
| 1     | GWTFSGAGAA | 867   | 875  | 9              | HLA-A*02:01 | 867           | 45             | 78782.54388               | 45                      | 78782.54388             | 45          | TRUE         | TRUE              |
| 1     | NCVADYSVL  | 347   | 355  | 9              | HLA-A*02:01 | 347           | 45             | 78782.54388               | 45                      | 78782.54388             | 45          | TRUE         | TRUE              |
| 1     | FRVVPVSGDV | 305   | 313  | 9              | HLA-A*02:01 | 305           | 45             | 79694.80274               | 45                      | 79694.80274             | 45          | TRUE         | TRUE              |
| 1     | AQALNTLVK  | 938   | 946  | 9              | HLA-A*02:01 | 938           | 45             | 80247.2207                | 45                      | 80247.2207              | 45          | TRUE         | TRUE              |
| 1     | FFAVSKPMG  | 137   | 145  | 9              | HLA-A*02:01 | 137           | 45             | 80617.6251                | 45                      | 80617.6251              | 45          | TRUE         | TRUE              |
| 1     | SEILDSPC   | 568   | 576  | 9              | HLA-A*02:01 | 568           | 45             | 80617.6251                | 45                      | 80617.6251              | 45          | TRUE         | TRUE              |
| 1     | TAIHADQLT  | 608   | 616  | 9              | HLA-A*02:01 | 608           | 45             | 80617.62506               | 45                      | 80617.62506             | 45          | TRUE         | TRUE              |
| 1     | KNQCVNFNF  | 521   | 529  | 9              | HLA-A*02:01 | 521           | 45             | 80617.62506               | 45                      |                         |             |              |                   |

| seq # | peptide    | start | end  | peptide length | allele      | peptide index | median binding | smmpmbec    | smmpmbec pe | legacy IC50 | legacy rank | scores equal | percentiles equal |
|-------|------------|-------|------|----------------|-------------|---------------|----------------|-------------|-------------|-------------|-------------|--------------|-------------------|
| 1     | ASSEVAVLY  | 590   | 598  | 9              | HLA-A*02:01 | 590           | 46             | 86982.12231 | 46          | 86982.12231 | 46          | TRUE         | TRUE              |
| 1     | HGVVFLHVT  | 1040  | 1048 | 9              | HLA-A*02:01 | 1040          | 46             | 87786.95798 | 46          | 87786.95798 | 46          | TRUE         | TRUE              |
| 1     | KPIKFLPLG  | 217   | 225  | 9              | HLA-A*02:01 | 217           | 47             | 88803.48305 | 47          | 88803.48305 | 47          | TRUE         | TRUE              |
| 1     | CYGVSAATKL | 366   | 374  | 9              | HLA-A*02:01 | 366           | 47             | 89008.19622 | 47          | 89008.19622 | 47          | TRUE         | TRUE              |
| 1     | NCDFVIGII  | 1107  | 1115 | 9              | HLA-A*02:01 | 1107          | 47             | 89831.77892 | 47          | 89831.77892 | 47          | TRUE         | TRUE              |
| 1     | NDVGFYTTT  | 479   | 487  | 9              | HLA-A*02:01 | 479           | 47             | 90454.46306 | 47          | 90454.46306 | 47          | TRUE         | TRUE              |
| 1     | CCMTSCSCS  | 1217  | 1225 | 9              | HLA-A*02:01 | 1217          | 47             | 91081.46345 | 47          | 91081.46345 | 47          | TRUE         | TRUE              |
| 1     | SDLDRCFTF  | 14    | 22   | 9              | HLA-A*02:01 | 14            | 47             | 91924.2299  | 47          | 91924.2299  | 47          | TRUE         | TRUE              |
| 1     | LIDLQELGK  | 1179  | 1187 | 9              | HLA-A*02:01 | 1179          | 47             | 92348.53282 | 47          | 92348.53282 | 47          | TRUE         | TRUE              |
| 1     | VVIRACNFE  | 123   | 131  | 9              | HLA-A*02:01 | 123           | 47             | 92561.41817 | 47          | 92561.41817 | 47          | TRUE         | TRUE              |
| 1     | DLICAKQFN  | 830   | 838  | 9              | HLA-A*02:01 | 830           | 47             | 92988.66227 | 47          | 92988.66227 | 47          | TRUE         | TRUE              |
| 1     | LKNNQCVNF  | 519   | 527  | 9              | HLA-A*02:01 | 519           | 47             | 92988.66227 | 47          | 92988.66227 | 47          | TRUE         | TRUE              |
| 1     | ESLTTTSTA  | 918   | 926  | 9              | HLA-A*02:01 | 918           | 47             | 93203.02327 | 47          | 93203.02327 | 47          | TRUE         | TRUE              |
| 1     | YKPTPLKVF  | 771   | 779  | 9              | HLA-A*02:01 | 771           | 47             | 93203.02327 | 47          | 93203.02327 | 47          | TRUE         | TRUE              |
| 1     | FNGLTVLPP  | 837   | 845  | 9              | HLA-A*02:01 | 837           | 47             | 93849.07576 | 47          | 93849.07576 | 47          | TRUE         | TRUE              |
| 1     | EIRASANLA  | 999   | 1007 | 9              | HLA-A*02:01 | 999           | 48             | 94282.26342 | 48          | 94282.26342 | 48          | TRUE         | TRUE              |
| 1     | VKQMYKTPT  | 767   | 775  | 9              | HLA-A*02:01 | 767           | 48             | 95814.22696 | 48          | 95814.22696 | 48          | TRUE         | TRUE              |
| 1     | ANLLQLQYS  | 732   | 740  | 9              | HLA-A*02:01 | 732           | 48             | 96256.4853  | 48          | 96256.4853  | 48          | TRUE         | TRUE              |
| 1     | GGTGVADIY  | 400   | 408  | 9              | HLA-A*02:01 | 400           | 48             | 96256.4853  | 48          | 96256.4853  | 48          | TRUE         | TRUE              |
| 1     | FGGVSVITP  | 578   | 586  | 9              | HLA-A*02:01 | 578           | 48             | 97820.5274  | 48          | 97820.5274  | 48          | TRUE         | TRUE              |
| 1     | TVCGPKLST  | 509   | 517  | 9              | HLA-A*02:01 | 509           | 48             | 97820.5274  | 48          | 97820.5274  | 48          | TRUE         | TRUE              |
| 1     | IYFAATEKS  | 87    | 95   | 9              | HLA-A*02:01 | 87            | 48             | 98046.02701 | 48          | 98046.02701 | 48          | TRUE         | TRUE              |
| 1     | CANLLQOYG  | 731   | 739  | 9              | HLA-A*02:01 | 731           | 48             | 98725.6496  | 48          | 98725.6496  | 48          | TRUE         | TRUE              |
| 1     | GDINARDUL  | 824   | 832  | 9              | HLA-A*02:01 | 824           | 48             | 99409.98311 | 48          | 99409.98311 | 48          | TRUE         | TRUE              |
| 1     | DLIKNQCVN  | 518   | 526  | 9              | HLA-A*02:01 | 518           | 48             | 100099.0602 | 48          | 100099.0602 | 48          | TRUE         | TRUE              |
| 1     | AEVQIDRLR  | 971   | 979  | 9              | HLA-A*02:01 | 971           | 48             | 101025.2654 | 48          | 101025.2654 | 48          | TRUE         | TRUE              |
| 1     | AKNLNESLI  | 1172  | 1180 | 9              | HLA-A*02:01 | 1172          | 48             | 101025.2654 | 48          | 101025.2654 | 48          | TRUE         | TRUE              |
| 1     | TSAAAYFVG  | 247   | 255  | 9              | HLA-A*02:01 | 247           | 48             | 101025.2654 | 48          | 101025.2654 | 48          | TRUE         | TRUE              |
| 1     | DEDDSEPLV  | 1239  | 1247 | 9              | HLA-A*02:01 | 1239          | 48             | 101960.0407 | 48          | 101960.0407 | 48          | TRUE         | TRUE              |
| 1     | LADAGFMKQ  | 810   | 818  | 9              | HLA-A*02:01 | 810           | 49             | 102195.0828 | 49          | 102195.0828 | 49          | TRUE         | TRUE              |
| 1     | VYADSVFVK  | 382   | 390  | 9              | HLA-A*02:01 | 382           | 49             | 102666.7939 | 49          | 102666.7939 | 49          | TRUE         | TRUE              |
| 1     | PIGAGIKCAS | 651   | 659  | 9              | HLA-A*02:01 | 651           | 49             | 102903.4653 | 49          | 102903.4653 | 49          | TRUE         | TRUE              |
| 1     | LKPTKRSFI  | 792   | 800  | 9              | HLA-A*02:01 | 792           | 49             | 103378.4461 | 49          | 103378.4461 | 49          | TRUE         | TRUE              |
| 1     | YSTGNNVFQ  | 622   | 630  | 9              | HLA-A*02:01 | 622           | 49             | 103378.4461 | 49          | 103378.4461 | 49          | TRUE         | TRUE              |
| 1     | ITDAVDCSQ  | 272   | 280  | 9              | HLA-A*02:01 | 272           | 49             | 103855.6193 | 49          | 103855.6193 | 49          | TRUE         | TRUE              |
| 1     | GVTONVLYE  | 892   | 900  | 9              | HLA-A*02:01 | 892           | 49             | 104095.0313 | 49          | 104095.0313 | 49          | TRUE         | TRUE              |
| 1     | SQILPDPLK  | 785   | 793  | 9              | HLA-A*02:01 | 785           | 49             | 104334.9951 | 49          | 104334.9951 | 49          | TRUE         | TRUE              |
| 1     | RFPNITNLC  | 315   | 323  | 9              | HLA-A*02:01 | 315           | 49             | 104575.5121 | 49          | 104575.5121 | 49          | TRUE         | TRUE              |
| 1     | MAYRFNGIG  | 884   | 892  | 9              | HLA-A*02:01 | 884           | 49             | 105058.2107 | 49          | 105058.2107 | 49          | TRUE         | TRUE              |
| 1     | GFMKGQYEC  | 814   | 822  | 9              | HLA-A*02:01 | 814           | 49             | 105543.1374 | 49          | 105543.1374 | 49          | TRUE         | TRUE              |
| 1     | NTLVKQLSS  | 942   | 950  | 9              | HLA-A*02:01 | 942           | 49             | 108250.5222 | 49          | 108250.5222 | 49          | TRUE         | TRUE              |
| 1     | FNKVLADLA  | 805   | 813  | 9              | HLA-A*02:01 | 805           | 49             | 108750.1839 | 49          | 108750.1839 | 49          | TRUE         | TRUE              |
| 1     | FTTAPAIHC  | 1057  | 1065 | 9              | HLA-A*02:01 | 1057          | 49             | 109000.879  | 49          | 109000.879  | 49          | TRUE         | TRUE              |
| 1     | QHTSSMRGV  | 32    | 40   | 9              | HLA-A*02:01 | 32            | 49             | 109504.0042 | 49          | 109504.0042 | 49          | TRUE         | TRUE              |
| 1     | KSQSVIINI  | 110   | 118  | 9              | HLA-A*02:01 | 110           | 49             | 110263.0496 | 49          | 110263.0496 | 49          | TRUE         | TRUE              |
| 1     | FKNKDGLFY  | 187   | 195  | 9              | HLA-A*02:01 | 187           | 49             | 110772.0008 | 49          | 110772.0008 | 49          | TRUE         | TRUE              |
| 1     | GGVSVITPG  | 579   | 587  | 9              | HLA-A*02:01 | 579           | 50             | 111796.9615 | 50          | 111796.9615 | 50          | TRUE         | TRUE              |
| 1     | SNFRVVPSP  | 303   | 311  | 9              | HLA-A*02:01 | 303           | 50             | 113091.5093 | 50          | 113091.5093 | 50          | TRUE         | TRUE              |
| 1     | PFFASPKPM  | 136   | 144  | 9              | HLA-A*02:01 | 136           | 50             | 113091.5093 | 50          | 113091.5093 | 50          | TRUE         | TRUE              |
| 1     | TFGNPVPIF  | 75    | 83   | 9              | HLA-A*02:01 | 75            | 50             | 113613.516  | 50          | 113613.516  | 50          | TRUE         | TRUE              |
| 1     | CAQKFNGLT  | 833   | 841  | 9              | HLA-A*02:01 | 833           | 50             | 114401.0472 | 50          | 114401.0472 | 50          | TRUE         | TRUE              |
| 1     | FYSNVTFGH  | 62    | 70   | 9              | HLA-A*02:01 | 62            | 50             | 114664.7689 | 50          | 114664.7689 | 50          | TRUE         | TRUE              |
| 1     | SSNFGAISS  | 949   | 957  | 9              | HLA-A*02:01 | 949           | 50             | 115459.5871 | 50          | 115459.5871 | 50          | TRUE         | TRUE              |
| 1     | GNNVFQTAQ  | 625   | 633  | 9              | HLA-A*02:01 | 625           | 50             | 116796.5461 | 50          | 116796.5461 | 50          | TRUE         | TRUE              |
| 1     | GFHTINHTF  | 68    | 76   | 9              | HLA-A*02:01 | 68            | 50             | 117335.6545 | 50          | 117335.6545 | 50          | TRUE         | TRUE              |
| 1     | LGINITNFR  | 224   | 232  | 9              | HLA-A*02:01 | 224           | 50             | 117335.6545 | 50          | 117335.6545 | 50          | TRUE         | TRUE              |
| 1     | ATVCGPKLS  | 508   | 516  | 9              | HLA-A*02:01 | 508           | 50             | 117335.6545 | 50          | 117335.6545 | 50          | TRUE         | TRUE              |
| 1     | VVPSGDVVR  | 307   | 315  | 9              | HLA-A*02:01 | 307           | 50             | 117606.1411 | 50          | 117606.1411 | 50          | TRUE         | TRUE              |
| 1     | QLTPAWRIY  | 614   | 622  | 9              | HLA-A*02:01 | 614           | 50             | 118148.9864 | 50          | 118148.9864 | 50          | TRUE         | TRUE              |
| 1     | YPDEIFRSD  | 42    | 50   | 9              | HLA-A*02:01 | 42            | 51             | 119792.6025 | 51          | 119792.6025 | 51          | TRUE         | TRUE              |
| 1     | RSFIEDLLF  | 797   | 805  | 9              | HLA-A*02:01 | 797           | 51             | 120901.0298 | 51          | 120901.0298 | 51          | TRUE         | TRUE              |
| 1     | LGADSIAYI  | 681   | 689  | 9              | HLA-A*02:01 | 681           | 51             | 121179.7354 | 51          | 121179.7354 | 51          | TRUE         | TRUE              |
| 1     | VFKNKDGFL  | 186   | 194  | 9              | HLA-A*02:01 | 186           | 51             | 121459.0836 | 51          | 121459.0836 | 51          | TRUE         | TRUE              |
| 1     | FGAISVLIN  | 952   | 960  | 9              | HLA-A*02:01 | 952           | 51             | 121459.0836 | 51          | 121459.0836 | 51          | TRUE         | TRUE              |
| 1     | VQAPNVTQH  | 25    | 33   | 9              | HLA-A*02:01 | 25            | 51             | 122300.9977 | 51          | 122300.9977 | 51          | TRUE         | TRUE              |
| 1     | YGSFCTQLN  | 738   | 746  | 9              | HLA-A*02:01 | 738           | 51             | 122865.5135 | 51          | 122865.5135 | 51          | TRUE         | TRUE              |
| 1     | GELCGDINA  | 820   | 828  | 9              | HLA-A*02:01 | 820           | 51             | 123148.7477 | 51          | 123148.7477 | 51          | TRUE         | TRUE              |
| 1     | CGPKLSTLD  | 511   | 519  | 9              | HLA-A*02:01 | 511           | 51             | 123717.1765 | 51          | 123717.1765 | 51          | TRUE         | TRUE              |
| 1     | GVYYPDEIF  | 39    | 47   | 9              | HLA-A*02:01 | 39            | 51             | 125438.2539 | 51          | 125438.2539 | 51          | TRUE         | TRUE              |
| 1     | GVVFLHVTY  | 1041  | 1049 | 9              | HLA-A*02:01 | 1041          | 51             | 125727.4189 | 51          | 125727.4189 | 51          | TRUE         | TRUE              |
| 1     | GAISSVLND  | 953   | 961  | 9              | HLA-A*02:01 | 953           | 51             | 126307.7503 | 51          | 126307.7503 | 51          | TRUE         | TRUE              |
| 1     | SPDVDLGD   | 1143  | 1151 | 9              | HLA-A*02:01 | 1143          | 51             | 126598.9198 | 51          | 126598.9198 | 51          | TRUE         | TRUE              |
| 1     | RFQPFQOFG  | 544   | 552  | 9              | HLA-A*02:01 | 544           | 51             | 128360.0862 | 51          | 128360.0862 | 51          | TRUE         | TRUE              |
| 1     | KSIVAYTMS  | 672   | 680  | 9              | HLA-A*02:01 | 672           | 51             | 128952.5694 | 51          | 128952.5694 | 51          | TRUE         | TRUE              |
| 1     | LSRLDKVEA  | 963   | 971  | 9              | HLA-A*02:01 | 963           | 52             | 130746.4784 | 52          | 130746.4784 | 52          | TRUE         | TRUE              |
| 1     | NHTFGNPVI  | 73    | 81   | 9              | HLA-A*02:01 | 73            | 52             | 133484.2421 | 52          | 133484.2421 | 52          | TRUE         | TRUE              |
| 1     | PGTNASSEV  | 586   | 594  | 9              | HLA-A*02:01 | 586           | 52             | 133791.9551 | 52          | 133791.9551 | 52          | TRUE         | TRUE              |
| 1     | TATAGWTFG  | 863   | 871  | 9              | HLA-A*02:01 | 863           | 52             | 134409.5107 | 52          | 134409.5107 | 52          | TRUE         | TRUE              |
| 1     | PCSFGGVSV  | 575   | 583  | 9              | HLA-A*02:01 | 575           | 52             | 136279.3332 | 52          | 136279.3332 | 52          | TRUE         | TRUE              |
| 1     | DVNCDTVST  | 600   | 608  | 9              | HLA-A*02:01 | 600           | 52             | 136593.4895 | 52          | 136593.4895 | 52          | TRUE         | TRUE              |
| 1     | TQHTSSMRD  | 31    | 39   | 9              | HLA-A*02:01 | 31            | 52             | 137540.3104 | 52          | 137540.3104 | 52          | TRUE         | TRUE              |
| 1     | QQQFGRDVS  | 549   | 557  | 9              | HLA-A*02:01 | 549           | 52             | 139453.6867 | 52          | 139453.6867 | 52          | TRUE         | TRUE              |
| 1     | DLGDSIGIN  | 1147  | 1155 | 9              | HLA-A*02:01 | 1147          | 52             | 140420.3335 | 5.20E+01    | 1.40E+05    | 52          | TRUE         | TRUE              |
| 1     | DSEPLVLGV  | 1242  | 1250 | 9              | HLA-A*02:01 | 1242          | 52             | 141068.4843 | 5.20E+01    | 1.41E+05    | 52          | TRUE         | TRUE              |
| 1     | LTAFSPAQD  | 235   | 243  | 9              | HLA-A*02:01 | 235           | 52             | 141393.6807 | 5.20E+01    | 1.41E+05    | 52          | TRUE         | TRUE              |
| 1     | ENGITIDAV  | 268   | 276  | 9              | HLA-A*02:01 | 268           | 52             | 142046.3243 | 5.20E+01    | 1.42E+05    | 52          | TRUE         | TRUE              |
| 1     | GKYEYQIKW  | 1186  | 1194 | 9              | HLA-A*02:01 | 1186          | 52             | 142046.3243 | 5.20E+01    | 1.42E+05    | 52          | TRUE         | TRUE              |
| 1     | FKHLREFVF  | 179   | 187  | 9              | HLA-A*02:01 | 179           | 52             | 142701.9803 | 5.20E+01    | 1.43E+05    | 52          | TRUE         | TRUE              |
| 1     | RDPKTSFIL  | 563   | 571  | 9              | HLA-A*02:01 | 563           | 53             | 144022.3855 | 5.30E+01    | 1.44E+05    | 53          | TRUE         | TRUE              |
| 1     | TEVMPVPSMA | 706   | 714  | 9              | HLA-A*02:01 | 706           | 53             | 144354.3914 | 5.30E+01    | 1.44E+05    | 53          | TRUE         | TRUE              |
| 1     | WIFITQRNFF | 1084  | 1092 | 9              | HLA-A*02:01 | 1084          | 53             | 144687.1626 | 5.30E+01    | 1.45E+05    | 53          | TRUE         | TRUE              |
| 1     | NYTQHTSSM  | 29    | 37   | 9              | HLA-A*02:01 | 29            | 53             | 145020.701  | 5.30E+01    | 1.45E+05    | 53          | TRUE         | TRUE              |
| 1     | EVAKNLNES  | 1170  | 1178 | 9              | HLA-A*02:01 | 1170          | 53             | 145020.701  | 5.30E+01    | 1.45E+05    | 53          | TRUE         | TRUE              |
| 1     | TTTGIGYQP  | 485   | 493  | 9              | HLA-A*02:01 | 485           | 53             | 145690      |             |             |             |              |                   |

| seq # | peptide    | start | end  | peptide length | allele      | peptide index | median binding | smmpmbec IC50 | smmpmbec p <sub>el</sub> | legacy IC50 | legacy rank | scores equal | percentiles equal |
|-------|------------|-------|------|----------------|-------------|---------------|----------------|---------------|--------------------------|-------------|-------------|--------------|-------------------|
| 1     | SATKNDLCL  | 370   | 378  | 9              | HLA-A*02:01 | 370           | 53             | 155035.088    | 5.30E+01                 | 1.55E+05    | 53          | TRUE         | TRUE              |
| 1     | YNYKLPDF   | 408   | 416  | 9              | HLA-A*02:01 | 408           | 53             | 155750.6974   | 5.30E+01                 | 1.56E+05    | 53          | TRUE         | TRUE              |
| 1     | AKTSVDCNM  | 714   | 722  | 9              | HLA-A*02:01 | 714           | 54             | 158281.4427   | 5.40E+01                 | 1.58E+05    | 54          | TRUE         | TRUE              |
| 1     | VSMAKTSVD  | 711   | 719  | 9              | HLA-A*02:01 | 711           | 54             | 158281.4427   | 5.40E+01                 | 1.58E+05    | 54          | TRUE         | TRUE              |
| 1     | ICHEGKAYF  | 1063  | 1071 | 9              | HLA-A*02:01 | 1063          | 54             | 159746.0028   | 5.40E+01                 | 1.60E+05    | 54          | TRUE         | TRUE              |
| 1     | TKRSFIEDL  | 795   | 803  | 9              | HLA-A*02:01 | 795           | 54             | 160114.2554   | 5.40E+01                 | 1.60E+05    | 54          | TRUE         | TRUE              |
| 1     | FGSTMNNKS  | 103   | 111  | 9              | HLA-A*02:01 | 103           | 54             | 161595.7743   | 5.40E+01                 | 1.62E+05    | 54          | TRUE         | TRUE              |
| 1     | PFERDISNV  | 450   | 458  | 9              | HLA-A*02:01 | 450           | 54             | 161968.2911   | 5.40E+01                 | 1.62E+05    | 54          | TRUE         | TRUE              |
| 1     | RQIAPGQTG  | 395   | 403  | 9              | HLA-A*02:01 | 395           | 54             | 163091.0016   | 5.40E+01                 | 1.63E+05    | 54          | TRUE         | TRUE              |
| 1     | SLCKGACSC  | 1224  | 1232 | 9              | HLA-A*02:01 | 1224          | 54             | 163091.0016   | 5.40E+01                 | 1.63E+05    | 54          | TRUE         | TRUE              |
| 1     | ICASYHTVS  | 656   | 664  | 9              | HLA-A*02:01 | 656           | 54             | 163091.0016   | 5.40E+01                 | 1.63E+05    | 54          | TRUE         | TRUE              |
| 1     | GIAAEQDRN  | 751   | 759  | 9              | HLA-A*02:01 | 751           | 54             | 164221.4945   | 5.40E+01                 | 1.64E+05    | 54          | TRUE         | TRUE              |
| 1     | GDISGINAS  | 1149  | 1157 | 9              | HLA-A*02:01 | 1149          | 54             | 166123.0897   | 5.40E+01                 | 1.66E+05    | 54          | TRUE         | TRUE              |
| 1     | ELDKYFKNH  | 1133  | 1141 | 9              | HLA-A*02:01 | 1133          | 54             | 167274.6      | 5.40E+01                 | 1.67E+05    | 54          | TRUE         | TRUE              |
| 1     | REGVVFVNG  | 1073  | 1081 | 9              | HLA-A*02:01 | 1073          | 55             | 168434.0921   | 5.50E+01                 | 1.68E+05    | 55          | TRUE         | TRUE              |
| 1     | TGTGVLTPS  | 533   | 541  | 9              | HLA-A*02:01 | 533           | 55             | 168822.3728   | 5.50E+01                 | 1.69E+05    | 55          | TRUE         | TRUE              |
| 1     | PSQERNFTT  | 1051  | 1059 | 9              | HLA-A*02:01 | 1051          | 55             | 169992.5936   | 5.50E+01                 | 1.70E+05    | 55          | TRUE         | TRUE              |
| 1     | VTYVPSQER  | 1047  | 1055 | 9              | HLA-A*02:01 | 1047          | 55             | 170384.467    | 5.50E+01                 | 1.70E+05    | 55          | TRUE         | TRUE              |
| 1     | NGCVNFNFN  | 522   | 530  | 9              | HLA-A*02:01 | 522           | 55             | 170777.2437   | 5.50E+01                 | 1.71E+05    | 55          | TRUE         | TRUE              |
| 1     | LYQDVNCTD  | 597   | 605  | 9              | HLA-A*02:01 | 597           | 55             | 171565.5157   | 5.50E+01                 | 1.72E+05    | 55          | TRUE         | TRUE              |
| 1     | VYVAWERKKI | 337   | 345  | 9              | HLA-A*02:01 | 337           | 55             | 171961.015    | 5.50E+01                 | 1.72E+05    | 55          | TRUE         | TRUE              |
| 1     | PATVCGPKL  | 507   | 515  | 9              | HLA-A*02:01 | 507           | 55             | 171961.015    | 5.50E+01                 | 1.72E+05    | 55          | TRUE         | TRUE              |
| 1     | IGAGICASY  | 652   | 660  | 9              | HLA-A*02:01 | 652           | 55             | 172754.751    | 5.50E+01                 | 1.73E+05    | 55          | TRUE         | TRUE              |
| 1     | POIITDNT   | 1094  | 1102 | 9              | HLA-A*02:01 | 1094          | 55             | 173152.9919   | 5.50E+01                 | 1.73E+05    | 55          | TRUE         | TRUE              |
| 1     | GVLTSSKR   | 536   | 544  | 9              | HLA-A*02:01 | 536           | 55             | 173952.2298   | 5.50E+01                 | 1.74E+05    | 55          | TRUE         | TRUE              |
| 1     | SEVAVLYQD  | 592   | 600  | 9              | HLA-A*02:01 | 592           | 55             | 174353.2311   | 5.50E+01                 | 1.74E+05    | 55          | TRUE         | TRUE              |
| 1     | LPLGINITN  | 222   | 230  | 9              | HLA-A*02:01 | 222           | 55             | 175966.5016   | 5.50E+01                 | 1.76E+05    | 55          | TRUE         | TRUE              |
| 1     | PTLKYGGF   | 774   | 782  | 9              | HLA-A*02:01 | 774           | 55             | 180480.3814   | 5.50E+01                 | 1.80E+05    | 55          | TRUE         | TRUE              |
| 1     | NVVRACNF   | 122   | 130  | 9              | HLA-A*02:01 | 122           | 55             | 180896.4316   | 5.50E+01                 | 1.81E+05    | 55          | TRUE         | TRUE              |
| 1     | QTHTIMFDN  | 147   | 155  | 9              | HLA-A*02:01 | 147           | 56             | 183835.7622   | 5.60E+01                 | 1.84E+05    | 56          | TRUE         | TRUE              |
| 1     | VSGTATAGW  | 860   | 868  | 9              | HLA-A*02:01 | 860           | 56             | 183835.7622   | 5.60E+01                 | 1.84E+05    | 56          | TRUE         | TRUE              |
| 1     | AELKCSVKS  | 284   | 292  | 9              | HLA-A*02:01 | 284           | 56             | 187253.5242   | 5.60E+01                 | 1.87E+05    | 56          | TRUE         | TRUE              |
| 1     | KTSVDCNMY  | 715   | 723  | 9              | HLA-A*02:01 | 715           | 56             | 188117.8472   | 5.60E+01                 | 1.88E+05    | 56          | TRUE         | TRUE              |
| 1     | LGDINARDL  | 823   | 831  | 9              | HLA-A*02:01 | 823           | 56             | 188117.8472   | 5.60E+01                 | 1.88E+05    | 56          | TRUE         | TRUE              |
| 1     | GSFCTQLNR  | 739   | 747  | 9              | HLA-A*02:01 | 739           | 56             | 188986.1597   | 5.60E+01                 | 1.89E+05    | 56          | TRUE         | TRUE              |
| 1     | KYFKNHTSP  | 1136  | 1144 | 9              | HLA-A*02:01 | 1136          | 56             | 188986.1597   | 5.60E+01                 | 1.89E+05    | 56          | TRUE         | TRUE              |
| 1     | ILSLRDKVE  | 962   | 970  | 9              | HLA-A*02:01 | 962           | 56             | 189858.4802   | 5.60E+01                 | 1.90E+05    | 56          | TRUE         | TRUE              |
| 1     | QTAQAGCLG  | 630   | 638  | 9              | HLA-A*02:01 | 630           | 56             | 192056.9378   | 5.60E+01                 | 1.92E+05    | 56          | TRUE         | TRUE              |
| 1     | IPFAMQMAY  | 878   | 886  | 9              | HLA-A*02:01 | 878           | 56             | 192499.6747   | 5.60E+01                 | 1.92E+05    | 56          | TRUE         | TRUE              |
| 1     | KCYGVSATK  | 365   | 373  | 9              | HLA-A*02:01 | 365           | 56             | 192943.4323   | 5.60E+01                 | 1.93E+05    | 56          | TRUE         | TRUE              |
| 1     | AYFVGYLKP  | 251   | 259  | 9              | HLA-A*02:01 | 251           | 56             | 193388.2129   | 5.60E+01                 | 1.93E+05    | 56          | TRUE         | TRUE              |
| 1     | GKGVHLMSF  | 1026  | 1034 | 9              | HLA-A*02:01 | 1026          | 56             | 195177.612    | 5.60E+01                 | 1.95E+05    | 56          | TRUE         | TRUE              |
| 1     | TINHFFGNP  | 71    | 79   | 9              | HLA-A*02:01 | 71            | 56             | 195627.5428   | 5.60E+01                 | 1.96E+05    | 56          | TRUE         | TRUE              |
| 1     | TORNFFSPQ  | 1087  | 1095 | 9              | HLA-A*02:01 | 1087          | 56             | 195627.5428   | 5.60E+01                 | 1.96E+05    | 56          | TRUE         | TRUE              |
| 1     | DVVRDLPSG  | 204   | 212  | 9              | HLA-A*02:01 | 204           | 57             | 200184.2937   | 5.70E+01                 | 2.00E+05    | 57          | TRUE         | TRUE              |
| 1     | IYSTGNVVF  | 621   | 629  | 9              | HLA-A*02:01 | 621           | 57             | 201571.9049   | 5.70E+01                 | 2.02E+05    | 57          | TRUE         | TRUE              |
| 1     | VPSGDDVRF  | 308   | 316  | 9              | HLA-A*02:01 | 308           | 57             | 202036.5761   | 5.70E+01                 | 2.02E+05    | 57          | TRUE         | TRUE              |
| 1     | ISITTEVMP  | 702   | 710  | 9              | HLA-A*02:01 | 702           | 57             | 202969.1346   | 5.70E+01                 | 2.03E+05    | 57          | TRUE         | TRUE              |
| 1     | RNIDATSTG  | 426   | 434  | 9              | HLA-A*02:01 | 426           | 57             | 203437.0268   | 5.70E+01                 | 2.03E+05    | 57          | TRUE         | TRUE              |
| 1     | TSWFITQRN  | 1082  | 1090 | 9              | HLA-A*02:01 | 1082          | 57             | 203905.9975   | 5.70E+01                 | 2.04E+05    | 57          | TRUE         | TRUE              |
| 1     | DVVRFPNIT  | 312   | 320  | 9              | HLA-A*02:01 | 312           | 57             | 203905.9975   | 5.70E+01                 | 2.04E+05    | 57          | TRUE         | TRUE              |
| 1     | THTIMFDNA  | 148   | 156  | 9              | HLA-A*02:01 | 148           | 57             | 204376.0494   | 5.70E+01                 | 2.04E+05    | 57          | TRUE         | TRUE              |
| 1     | STDLKNQC   | 516   | 524  | 9              | HLA-A*02:01 | 516           | 57             | 205319.4064   | 5.70E+01                 | 2.05E+05    | 57          | TRUE         | TRUE              |
| 1     | LVKQLSSNF  | 944   | 952  | 9              | HLA-A*02:01 | 944           | 57             | 206742.6125   | 5.70E+01                 | 2.07E+05    | 57          | TRUE         | TRUE              |
| 1     | EYIKWPWVY  | 1189  | 1197 | 9              | HLA-A*02:01 | 1189          | 57             | 207219.2035   | 5.70E+01                 | 2.07E+05    | 57          | TRUE         | TRUE              |
| 1     | LSSNFSAIS  | 948   | 956  | 9              | HLA-A*02:01 | 948           | 57             | 207696.8931   | 5.70E+01                 | 2.08E+05    | 57          | TRUE         | TRUE              |
| 1     | GFNFSQLP   | 781   | 789  | 9              | HLA-A*02:01 | 781           | 57             | 208655.5784   | 5.70E+01                 | 2.09E+05    | 57          | TRUE         | TRUE              |
| 1     | FYTTTIGY   | 483   | 491  | 9              | HLA-A*02:01 | 483           | 57             | 208655.5784   | 5.70E+01                 | 2.09E+05    | 57          | TRUE         | TRUE              |
| 1     | NTVVDPLQP  | 1117  | 1125 | 9              | HLA-A*02:01 | 1117          | 57             | 211558.2666   | 5.70E+01                 | 2.12E+05    | 57          | TRUE         | TRUE              |
| 1     | FKELDKYF   | 1130  | 1138 | 9              | HLA-A*02:01 | 1130          | 58             | 216486.0917   | 5.80E+01                 | 2.16E+05    | 58          | TRUE         | TRUE              |
| 1     | LPFYSVNTG  | 60    | 68   | 9              | HLA-A*02:01 | 60            | 58             | 219497.7132   | 5.80E+01                 | 2.19E+05    | 58          | TRUE         | TRUE              |
| 1     | QAAPHGVVF  | 1036  | 1044 | 9              | HLA-A*02:01 | 1036          | 58             | 219497.7132   | 5.80E+01                 | 2.19E+05    | 58          | TRUE         | TRUE              |
| 1     | ISIQIESTL  | 913   | 921  | 9              | HLA-A*02:01 | 913           | 58             | 220510.8686   | 5.80E+01                 | 2.21E+05    | 58          | TRUE         | TRUE              |
| 1     | NAPATVCGP  | 505   | 513  | 9              | HLA-A*02:01 | 505           | 58             | 221019.1987   | 5.80E+01                 | 2.21E+05    | 58          | TRUE         | TRUE              |
| 1     | QPYRVVVL   | 492   | 500  | 9              | HLA-A*02:01 | 492           | 58             | 221528.7005   | 5.80E+01                 | 2.22E+05    | 58          | TRUE         | TRUE              |
| 1     | DGKPCPTPA  | 463   | 471  | 9              | HLA-A*02:01 | 463           | 58             | 223578.4804   | 5.80E+01                 | 2.24E+05    | 58          | TRUE         | TRUE              |
| 1     | VGVLKPTTF  | 254   | 262  | 9              | HLA-A*02:01 | 254           | 58             | 223578.4804   | 5.80E+01                 | 2.24E+05    | 58          | TRUE         | TRUE              |
| 1     | LKGACSCGS  | 1226  | 1234 | 9              | HLA-A*02:01 | 1226          | 58             | 224093.882    | 5.80E+01                 | 2.24E+05    | 58          | TRUE         | TRUE              |
| 1     | GACSCSCSC  | 1228  | 1236 | 9              | HLA-A*02:01 | 1228          | 58             | 224610.4718   | 5.80E+01                 | 2.25E+05    | 58          | TRUE         | TRUE              |
| 1     | SGSDLDRCT  | 12    | 20   | 9              | HLA-A*02:01 | 12            | 58             | 224610.4718   | 5.80E+01                 | 2.25E+05    | 58          | TRUE         | TRUE              |
| 1     | KGITYQSNF  | 297   | 305  | 9              | HLA-A*02:01 | 297           | 58             | 225128.2524   | 5.80E+01                 | 2.25E+05    | 58          | TRUE         | TRUE              |
| 1     | PFGEVFNAT  | 324   | 332  | 9              | HLA-A*02:01 | 324           | 58             | 226167.3972   | 5.80E+01                 | 2.26E+05    | 58          | TRUE         | TRUE              |
| 1     | ADSSIAYSN  | 683   | 691  | 9              | HLA-A*02:01 | 683           | 58             | 229313.6991   | 5.80E+01                 | 2.29E+05    | 58          | TRUE         | TRUE              |
| 1     | LFNKVTLAD  | 804   | 812  | 9              | HLA-A*02:01 | 804           | 58             | 230903.2257   | 5.80E+01                 | 2.31E+05    | 58          | TRUE         | TRUE              |
| 1     | LQELGKYEQ  | 1182  | 1190 | 9              | HLA-A*02:01 | 1182          | 58             | 231969.0266   | 5.80E+01                 | 2.32E+05    | 58          | TRUE         | TRUE              |
| 1     | APHGVVFLH  | 1038  | 1046 | 9              | HLA-A*02:01 | 1038          | 59             | 232503.7704   | 5.90E+01                 | 2.33E+05    | 59          | TRUE         | TRUE              |
| 1     | GNFKHLREF  | 177   | 185  | 9              | HLA-A*02:01 | 177           | 59             | 234655.1013   | 5.90E+01                 | 2.35E+05    | 59          | TRUE         | TRUE              |
| 1     | SSVLNDILS  | 956   | 964  | 9              | HLA-A*02:01 | 956           | 59             | 234655.1013   | 5.90E+01                 | 2.35E+05    | 59          | TRUE         | TRUE              |
| 1     | VTGFHTINH  | 66    | 74   | 9              | HLA-A*02:01 | 66            | 59             | 239017.6653   | 5.90E+01                 | 2.39E+05    | 59          | TRUE         | TRUE              |
| 1     | DGFLVYVYG  | 191   | 199  | 9              | HLA-A*02:01 | 191           | 59             | 241229.2686   | 5.90E+01                 | 2.41E+05    | 59          | TRUE         | TRUE              |
| 1     | AFSLDVSEK  | 167   | 175  | 9              | HLA-A*02:01 | 167           | 59             | 242901.39     | 5.90E+01                 | 2.43E+05    | 59          | TRUE         | TRUE              |
| 1     | ASANLAATK  | 1002  | 1010 | 9              | HLA-A*02:01 | 1002          | 59             | 244585.102    | 5.90E+01                 | 2.45E+05    | 59          | TRUE         | TRUE              |
| 1     | FNTLKPIKF  | 213   | 221  | 9              | HLA-A*02:01 | 213           | 59             | 246848.2201   | 5.90E+01                 | 2.47E+05    | 59          | TRUE         | TRUE              |
| 1     | YHTVSLIRS  | 660   | 668  | 9              | HLA-A*02:01 | 660           | 59             | 250859.181    | 5.90E+01                 | 2.51E+05    | 59          | TRUE         | TRUE              |
| 1     | LHVTVPVSQ  | 1045  | 1053 | 9              | HLA-A*02:01 | 1045          | 59             | 252598.0537   | 5.90E+01                 | 2.53E+05    | 59          | TRUE         | TRUE              |
| 1     | GSOLDRCTT  | 13    | 21   | 9              | HLA-A*02:01 | 13            | 60             | 253180.3524   | 6.00E+01                 | 2.53E+05    | 60          | TRUE         | TRUE              |
| 1     | LRSTSQSKI  | 666   | 674  | 9              | HLA-A*02:01 | 666           | 60             | 254935.3148   | 6.00E+01                 | 2.55E+05    | 60          | TRUE         | TRUE              |
| 1     | YFKNHTSPD  | 1137  | 1145 | 9              | HLA-A*02:01 | 1137          | 60             | 255523.0013   | 6.00E+01                 | 2.56E+05    | 60          | TRUE         | TRUE              |
| 1     | TVSLRSTS   | 662   | 670  | 9              | HLA-A*02:01 | 662           | 60             | 256112.0427   | 6.00E+01                 | 2.56E+05    | 60          | TRUE         | TRUE              |
| 1     | DKVEAEVQI  | 967   | 975  | 9              | HLA-A*02:01 | 967           | 60             | 256112.0427   | 6.00E+01                 | 2.56E+05    | 60          | TRUE         | TRUE              |
| 1     | FERDISNVP  | 451   | 459  | 9              | HLA-A*02:01 | 451           | 60             | 256702.4419   | 6.00E+01                 | 2.57E+05    | 60          | TRUE         | TRUE              |
| 1     | ELKCSVKSF  | 285   | 293  | 9              |             |               |                |               |                          |             |             |              |                   |

| seq # | peptide    | start | end  | peptide length | allele      | peptide index | median binding | smmpmbec IC50 | smmpmbec p <sub>el</sub> | legacy IC50 | legacy rank | scores equal | percentiles equal |
|-------|------------|-------|------|----------------|-------------|---------------|----------------|---------------|--------------------------|-------------|-------------|--------------|-------------------|
| 1     | NRALSGIAA  | 746   | 754  | 9              | HLA-A*02:01 | 746           | 60             | 273797.8289   | 6.00E+01                 | 2.74E+05    | 60          | TRUE         | TRUE              |
| 1     | OCVNFNFNG  | 523   | 531  | 9              | HLA-A*02:01 | 523           | 61             | 277606.7361   | 6.10E+01                 | 2.78E+05    | 61          | TRUE         | TRUE              |
| 1     | EVFNATKFP  | 327   | 335  | 9              | HLA-A*02:01 | 327           | 61             | 280175.3996   | 6.10E+01                 | 2.80E+05    | 61          | TRUE         | TRUE              |
| 1     | DLQELGKYE  | 1181  | 1189 | 9              | HLA-A*02:01 | 1181          | 61             | 282117.4827   | 6.10E+01                 | 2.82E+05    | 61          | TRUE         | TRUE              |
| 1     | MSECVLGQS  | 1011  | 1019 | 9              | HLA-A*02:01 | 1011          | 61             | 283419.6778   | 6.10E+01                 | 2.83E+05    | 61          | TRUE         | TRUE              |
| 1     | PFYSNVTFG  | 61    | 69   | 9              | HLA-A*02:01 | 61            | 61             | 285384.2492   | 6.10E+01                 | 2.85E+05    | 61          | TRUE         | TRUE              |
| 1     | KFPSVYAWE  | 333   | 341  | 9              | HLA-A*02:01 | 333           | 61             | 287362.4383   | 6.10E+01                 | 2.87E+05    | 61          | TRUE         | TRUE              |
| 1     | KSGNFKHLR  | 175   | 183  | 9              | HLA-A*02:01 | 175           | 61             | 287362.4383   | 6.10E+01                 | 2.87E+05    | 61          | TRUE         | TRUE              |
| 1     | PAICHEGKA  | 1061  | 1069 | 9              | HLA-A*02:01 | 1061          | 61             | 288688.843    | 6.10E+01                 | 2.89E+05    | 61          | TRUE         | TRUE              |
| 1     | TFMLKYDEN  | 261   | 269  | 9              | HLA-A*02:01 | 261           | 61             | 290689.9385   | 6.10E+01                 | 2.91E+05    | 61          | TRUE         | TRUE              |
| 1     | VVFVNGTSW  | 1076  | 1084 | 9              | HLA-A*02:01 | 1076          | 61             | 292031.7023   | 6.10E+01                 | 2.92E+05    | 61          | TRUE         | TRUE              |
| 1     | VLGQSKRVD  | 1015  | 1023 | 9              | HLA-A*02:01 | 1015          | 61             | 293379.6594   | 6.10E+01                 | 2.93E+05    | 61          | TRUE         | TRUE              |
| 1     | GNYNKYRYR  | 434   | 442  | 9              | HLA-A*02:01 | 434           | 61             | 293379.6594   | 6.10E+01                 | 2.93E+05    | 61          | TRUE         | TRUE              |
| 1     | SWFITQRNF  | 1083  | 1091 | 9              | HLA-A*02:01 | 1083          | 62             | 296776.8357   | 6.20E+01                 | 2.97E+05    | 62          | TRUE         | TRUE              |
| 1     | CNFECLDNP  | 128   | 136  | 9              | HLA-A*02:01 | 128           | 62             | 297460.977    | 6.20E+01                 | 2.97E+05    | 62          | TRUE         | TRUE              |
| 1     | QALNTLVKQ  | 939   | 947  | 9              | HLA-A*02:01 | 939           | 62             | 297460.977    | 6.20E+01                 | 2.97E+05    | 62          | TRUE         | TRUE              |
| 1     | DEIFRSDTL  | 44    | 52   | 9              | HLA-A*02:01 | 44            | 62             | 299522.878    | 6.20E+01                 | 3.00E+05    | 62          | TRUE         | TRUE              |
| 1     | LNAPATVCG  | 504   | 512  | 9              | HLA-A*02:01 | 504           | 62             | 300905.4128   | 6.20E+01                 | 3.01E+05    | 62          | TRUE         | TRUE              |
| 1     | CDNPFFAVS  | 133   | 141  | 9              | HLA-A*02:01 | 133           | 62             | 305091.424    | 6.20E+01                 | 3.05E+05    | 62          | TRUE         | TRUE              |
| 1     | YFAATEKSN  | 88    | 96   | 9              | HLA-A*02:01 | 88            | 62             | 306499.6621   | 6.20E+01                 | 3.06E+05    | 62          | TRUE         | TRUE              |
| 1     | DVSTAIDAH  | 605   | 613  | 9              | HLA-A*02:01 | 605           | 62             | 308624.216    | 6.20E+01                 | 3.09E+05    | 62          | TRUE         | TRUE              |
| 1     | VEAEVQIDR  | 969   | 977  | 9              | HLA-A*02:01 | 969           | 62             | 310048.761    | 6.20E+01                 | 3.10E+05    | 62          | TRUE         | TRUE              |
| 1     | VAVLYQDVN  | 594   | 602  | 9              | HLA-A*02:01 | 594           | 62             | 310763.4971   | 6.20E+01                 | 3.11E+05    | 62          | TRUE         | TRUE              |
| 1     | RPFERDISN  | 449   | 457  | 9              | HLA-A*02:01 | 449           | 62             | 311479.8809   | 6.20E+01                 | 3.11E+05    | 62          | TRUE         | TRUE              |
| 1     | SYECDPIIG  | 645   | 653  | 9              | HLA-A*02:01 | 645           | 62             | 312917.6067   | 6.20E+01                 | 3.13E+05    | 62          | TRUE         | TRUE              |
| 1     | LDISPCSGF  | 571   | 579  | 9              | HLA-A*02:01 | 571           | 62             | 314361.9688   | 6.20E+01                 | 3.14E+05    | 62          | TRUE         | TRUE              |
| 1     | FDDVQAPNY  | 22    | 30   | 9              | HLA-A*02:01 | 22            | 62             | 315086.648    | 6.20E+01                 | 3.15E+05    | 62          | TRUE         | TRUE              |
| 1     | PTNFSISIT  | 697   | 705  | 9              | HLA-A*02:01 | 697           | 62             | 315086.648    | 6.20E+01                 | 3.15E+05    | 62          | TRUE         | TRUE              |
| 1     | IKNQCVNFN  | 520   | 528  | 9              | HLA-A*02:01 | 520           | 62             | 317270.7243   | 6.20E+01                 | 3.17E+05    | 62          | TRUE         | TRUE              |
| 1     | AFSPAQDIW  | 237   | 245  | 9              | HLA-A*02:01 | 237           | 63             | 318002.1088   | 6.30E+01                 | 3.18E+05    | 63          | TRUE         | TRUE              |
| 1     | VRGWVFGST  | 98    | 106  | 9              | HLA-A*02:01 | 98            | 63             | 318002.1088   | 6.30E+01                 | 3.18E+05    | 63          | TRUE         | TRUE              |
| 1     | LYVYGYQOP  | 194   | 202  | 9              | HLA-A*02:01 | 194           | 63             | 318735.1794   | 6.30E+01                 | 3.19E+05    | 63          | TRUE         | TRUE              |
| 1     | TTFMKLKYE  | 260   | 268  | 9              | HLA-A*02:01 | 260           | 63             | 320944.5461   | 6.30E+01                 | 3.21E+05    | 63          | TRUE         | TRUE              |
| 1     | SGNCDVIGV  | 1105  | 1113 | 9              | HLA-A*02:01 | 1105          | 63             | 320944.5461   | 6.30E+01                 | 3.21E+05    | 63          | TRUE         | TRUE              |
| 1     | HVDTSYECD  | 641   | 649  | 9              | HLA-A*02:01 | 641           | 63             | 321684.3997   | 6.30E+01                 | 3.22E+05    | 63          | TRUE         | TRUE              |
| 1     | GFNTLKPIF  | 212   | 220  | 9              | HLA-A*02:01 | 212           | 63             | 323169.2274   | 6.30E+01                 | 3.23E+05    | 63          | TRUE         | TRUE              |
| 1     | RVDFCGKGK  | 1021  | 1029 | 9              | HLA-A*02:01 | 1021          | 63             | 323914.2094   | 6.30E+01                 | 3.24E+05    | 63          | TRUE         | TRUE              |
| 1     | MYICGDSTE  | 722   | 730  | 9              | HLA-A*02:01 | 722           | 63             | 325409.3295   | 6.30E+01                 | 3.25E+05    | 63          | TRUE         | TRUE              |
| 1     | NFSQILPDP  | 783   | 791  | 9              | HLA-A*02:01 | 783           | 63             | 326159.4755   | 6.30E+01                 | 3.26E+05    | 63          | TRUE         | TRUE              |
| 1     | GAGAAQLIP  | 871   | 879  | 9              | HLA-A*02:01 | 871           | 63             | 327664.9592   | 6.30E+01                 | 3.28E+05    | 63          | TRUE         | TRUE              |
| 1     | SGDVRFPFN  | 310   | 318  | 9              | HLA-A*02:01 | 310           | 63             | 332223.2328   | 6.30E+01                 | 3.32E+05    | 63          | TRUE         | TRUE              |
| 1     | SFPQAAAPHG | 1033  | 1041 | 9              | HLA-A*02:01 | 1033          | 63             | 333756.7056   | 6.30E+01                 | 3.34E+05    | 63          | TRUE         | TRUE              |
| 1     | DVDLDGISG  | 1145  | 1153 | 9              | HLA-A*02:01 | 1145          | 63             | 336844.9184   | 6.30E+01                 | 3.37E+05    | 63          | TRUE         | TRUE              |
| 1     | DVIGIINN   | 1109  | 1117 | 9              | HLA-A*02:01 | 1109          | 63             | 343898.277    | 6.30E+01                 | 3.44E+05    | 63          | TRUE         | TRUE              |
| 1     | IQKEIDRLN  | 1161  | 1169 | 9              | HLA-A*02:01 | 1161          | 63             | 346282.066    | 6.30E+01                 | 3.46E+05    | 63          | TRUE         | TRUE              |
| 1     | LTSGSDLDL  | 10    | 18   | 9              | HLA-A*02:01 | 10            | 63             | 347080.3286   | 6.30E+01                 | 3.47E+05    | 63          | TRUE         | TRUE              |
| 1     | YRVVLSFE   | 494   | 502  | 9              | HLA-A*02:01 | 494           | 63             | 347880.4314   | 6.30E+01                 | 3.48E+05    | 63          | TRUE         | TRUE              |
| 1     | APGQTKGVI  | 398   | 406  | 9              | HLA-A*02:01 | 398           | 63             | 351099.3294   | 6.30E+01                 | 3.51E+05    | 63          | TRUE         | TRUE              |
| 1     | AGFMKQOYE  | 813   | 821  | 9              | HLA-A*02:01 | 813           | 64             | 351908.697    | 6.40E+01                 | 3.52E+05    | 64          | TRUE         | TRUE              |
| 1     | KKISNCVAD  | 343   | 351  | 9              | HLA-A*02:01 | 343           | 64             | 355164.8681   | 6.40E+01                 | 3.55E+05    | 64          | TRUE         | TRUE              |
| 1     | QSVIINNS   | 112   | 120  | 9              | HLA-A*02:01 | 112           | 64             | 358451.1681   | 6.40E+01                 | 3.58E+05    | 64          | TRUE         | TRUE              |
| 1     | NVTGFHTIN  | 65    | 73   | 9              | HLA-A*02:01 | 65            | 64             | 361767.8759   | 6.40E+01                 | 3.62E+05    | 64          | TRUE         | TRUE              |
| 1     | RACNFELCD  | 126   | 134  | 9              | HLA-A*02:01 | 126           | 64             | 364275.5311   | 6.40E+01                 | 3.64E+05    | 64          | TRUE         | TRUE              |
| 1     | CSCGSCCKF  | 1230  | 1238 | 9              | HLA-A*02:01 | 1230          | 64             | 366800.5684   | 6.40E+01                 | 3.67E+05    | 64          | TRUE         | TRUE              |
| 1     | RSDTLYLITQ | 48    | 56   | 9              | HLA-A*02:01 | 48            | 64             | 376209.7095   | 6.40E+01                 | 3.76E+05    | 64          | TRUE         | TRUE              |
| 1     | IADYNYKLP  | 405   | 413  | 9              | HLA-A*02:01 | 405           | 65             | 377946.2147   | 6.50E+01                 | 3.78E+05    | 65          | TRUE         | TRUE              |
| 1     | EAEVQIDRL  | 970   | 978  | 9              | HLA-A*02:01 | 970           | 65             | 378817.4707   | 6.50E+01                 | 3.79E+05    | 65          | TRUE         | TRUE              |
| 1     | TSGLDLDR   | 11    | 19   | 9              | HLA-A*02:01 | 11            | 65             | 378817.4707   | 6.50E+01                 | 3.79E+05    | 65          | TRUE         | TRUE              |
| 1     | FNIGIVTQN  | 888   | 896  | 9              | HLA-A*02:01 | 888           | 65             | 382322.6256   | 6.50E+01                 | 3.82E+05    | 65          | TRUE         | TRUE              |
| 1     | GPKLSTDL   | 512   | 520  | 9              | HLA-A*02:01 | 512           | 65             | 382322.6256   | 6.50E+01                 | 3.82E+05    | 65          | TRUE         | TRUE              |
| 1     | GVSAATKLD  | 368   | 376  | 9              | HLA-A*02:01 | 368           | 65             | 382322.6256   | 6.50E+01                 | 3.82E+05    | 65          | TRUE         | TRUE              |
| 1     | LPPLITDDM  | 843   | 851  | 9              | HLA-A*02:01 | 843           | 65             | 387641.2631   | 6.50E+01                 | 3.88E+05    | 65          | TRUE         | TRUE              |
| 1     | IMKQVGECLG | 816   | 824  | 9              | HLA-A*02:01 | 816           | 65             | 388534.8685   | 6.50E+01                 | 3.89E+05    | 65          | TRUE         | TRUE              |
| 1     | EIFRSDTLY  | 45    | 53   | 9              | HLA-A*02:01 | 45            | 65             | 394848.0522   | 6.50E+01                 | 3.95E+05    | 65          | TRUE         | TRUE              |
| 1     | LPSGFNTLK  | 209   | 217  | 9              | HLA-A*02:01 | 209           | 65             | 398501.5363   | 6.50E+01                 | 3.99E+05    | 65          | TRUE         | TRUE              |
| 1     | YENKQKIAN  | 899   | 907  | 9              | HLA-A*02:01 | 899           | 65             | 401263.817    | 6.50E+01                 | 4.01E+05    | 65          | TRUE         | TRUE              |
| 1     | CFSNVYADS  | 378   | 386  | 9              | HLA-A*02:01 | 378           | 65             | 403115.9666   | 6.50E+01                 | 4.03E+05    | 65          | TRUE         | TRUE              |
| 1     | QTSNFRVVP  | 301   | 309  | 9              | HLA-A*02:01 | 301           | 65             | 404976.6653   | 6.50E+01                 | 4.05E+05    | 65          | TRUE         | TRUE              |
| 1     | LAWNTRNID  | 421   | 429  | 9              | HLA-A*02:01 | 421           | 65             | 405910.233    | 6.50E+01                 | 4.06E+05    | 65          | TRUE         | TRUE              |
| 1     | NARDLICAQ  | 827   | 835  | 9              | HLA-A*02:01 | 827           | 65             | 405910.233    | 6.50E+01                 | 4.06E+05    | 65          | TRUE         | TRUE              |
| 1     | GAGICASYH  | 653   | 661  | 9              | HLA-A*02:01 | 653           | 65             | 408723.8683   | 6.50E+01                 | 4.09E+05    | 65          | TRUE         | TRUE              |
| 1     | QESLITTTST | 917   | 925  | 9              | HLA-A*02:01 | 917           | 66             | 412505.7437   | 6.60E+01                 | 4.13E+05    | 66          | TRUE         | TRUE              |
| 1     | ERNFTTAPA  | 1054  | 1062 | 9              | HLA-A*02:01 | 1054          | 66             | 416322.6123   | 6.60E+01                 | 4.16E+05    | 66          | TRUE         | TRUE              |
| 1     | GFYTTTGIG  | 482   | 490  | 9              | HLA-A*02:01 | 482           | 66             | 416322.6123   | 6.60E+01                 | 4.16E+05    | 66          | TRUE         | TRUE              |
| 1     | SDAFSLDVS  | 165   | 173  | 9              | HLA-A*02:01 | 165           | 66             | 427002.0893   | 6.60E+01                 | 4.27E+05    | 66          | TRUE         | TRUE              |
| 1     | IWGTSAAY   | 244   | 252  | 9              | HLA-A*02:01 | 244           | 66             | 428973.0414   | 6.60E+01                 | 4.29E+05    | 66          | TRUE         | TRUE              |
| 1     | QTGVADIYN  | 401   | 409  | 9              | HLA-A*02:01 | 401           | 66             | 435943.2926   | 6.60E+01                 | 4.36E+05    | 66          | TRUE         | TRUE              |
| 1     | AYFPREGVF  | 1069  | 1077 | 9              | HLA-A*02:01 | 1069          | 66             | 439977.0262   | 6.60E+01                 | 4.40E+05    | 66          | TRUE         | TRUE              |
| 1     | GWVFGSTMN  | 100   | 108  | 9              | HLA-A*02:01 | 100           | 67             | 445071.72     | 6.70E+01                 | 4.45E+05    | 67          | TRUE         | TRUE              |
| 1     | WNTRNIDAT  | 423   | 431  | 9              | HLA-A*02:01 | 423           | 67             | 446097.7163   | 6.70E+01                 | 4.46E+05    | 67          | TRUE         | TRUE              |
| 1     | KVEAEVQID  | 968   | 976  | 9              | HLA-A*02:01 | 968           | 67             | 447126.0778   | 6.70E+01                 | 4.47E+05    | 67          | TRUE         | TRUE              |
| 1     | INSTFFSTFK | 357   | 365  | 9              | HLA-A*02:01 | 357           | 67             | 449189.918    | 6.70E+01                 | 4.49E+05    | 67          | TRUE         | TRUE              |
| 1     | SGTATAGWT  | 861   | 869  | 9              | HLA-A*02:01 | 861           | 67             | 449189.918    | 6.70E+01                 | 4.49E+05    | 67          | TRUE         | TRUE              |
| 1     | TTTSTALGK  | 921   | 929  | 9              | HLA-A*02:01 | 921           | 67             | 456488.667    | 6.70E+01                 | 4.56E+05    | 67          | TRUE         | TRUE              |
| 1     | TTGIGYQPY  | 486   | 494  | 9              | HLA-A*02:01 | 486           | 67             | 459652.8953   | 6.70E+01                 | 4.60E+05    | 67          | TRUE         | TRUE              |
| 1     | LNRLASGIA  | 745   | 753  | 9              | HLA-A*02:01 | 745           | 67             | 463906.0111   | 6.70E+01                 | 4.64E+05    | 67          | TRUE         | TRUE              |
| 1     | KDGLFYVYK  | 190   | 198  | 9              | HLA-A*02:01 | 190           | 67             | 470359.5866   | 6.70E+01                 | 4.70E+05    | 67          | TRUE         | TRUE              |
| 1     | ITGRQLSQD  | 979   | 987  | 9              | HLA-A*02:01 | 979           | 67             | 472530.6678   | 6.70E+01                 | 4.73E+05    | 67          | TRUE         | TRUE              |
| 1     | VVRFNPITN  | 313   | 321  | 9              | HLA-A*02:01 | 313           | 67             | 472530.6678   | 6.70E+01                 | 4.73E+05    | 67          | TRUE         | TRUE              |
| 1     | TAGWTFGAG  | 865   | 873  | 9              | HLA-A*02:01 | 865           | 67             | 474711.7703   | 6.70E+01                 | 4.75E+05    | 67          | TRUE         | TRUE              |
| 1     | DINARDLIC  | 825   | 833  | 9              | HLA-A*02:01 | 825           | 67             | 475806.0939   | 6.70E+01                 | 4.76E+05    | 67          | TRUE         | TRUE              |
| 1     | RDUCAQCKF  | 829   | 837  | 9              | HLA-A*02:01 | 829           | 67             | 478002.3151</ |                          |             |             |              |                   |

| seq # | peptide    | start | end  | peptide length | allele      | peptide index | median binding | smmpmbec IC50 | smmpmbec p <sub>el</sub> | legacy IC50 | legacy rank | scores equal | percentiles equal |
|-------|------------|-------|------|----------------|-------------|---------------|----------------|---------------|--------------------------|-------------|-------------|--------------|-------------------|
| 1     | LKPTTFMLK  | 257   | 265  | 9              | HLA-A*02:01 | 257           | 68             | 513369.4255   | 6.80E+01                 | 5.13E+05    | 68          | TRUE         | TRUE              |
| 1     | NASVVNIQK  | 1155  | 1163 | 9              | HLA-A*02:01 | 1155          | 68             | 513369.4255   | 6.80E+01                 | 5.13E+05    | 68          | TRUE         | TRUE              |
| 1     | NVPFSPDGK  | 457   | 465  | 9              | HLA-A*02:01 | 457           | 68             | 516927.9323   | 6.80E+01                 | 5.17E+05    | 68          | TRUE         | TRUE              |
| 1     | KHLREFVFK  | 180   | 188  | 9              | HLA-A*02:01 | 180           | 68             | 518119.5743   | 6.80E+01                 | 5.18E+05    | 68          | TRUE         | TRUE              |
| 1     | VSLLRSTSQ  | 663   | 671  | 9              | HLA-A*02:01 | 663           | 68             | 518119.5743   | 6.80E+01                 | 5.18E+05    | 68          | TRUE         | TRUE              |
| 1     | FGEVFNATK  | 325   | 333  | 9              | HLA-A*02:01 | 325           | 68             | 519313.9632   | 6.80E+01                 | 5.19E+05    | 68          | TRUE         | TRUE              |
| 1     | TSCCSCLKG  | 1220  | 1228 | 9              | HLA-A*02:01 | 1220          | 69             | 521711.008    | 6.90E+01                 | 5.22E+05    | 69          | TRUE         | TRUE              |
| 1     | YGVVSATLKN | 367   | 375  | 9              | HLA-A*02:01 | 367           | 69             | 524119.1162   | 6.90E+01                 | 5.24E+05    | 69          | TRUE         | TRUE              |
| 1     | TSPDVLGD   | 1142  | 1150 | 9              | HLA-A*02:01 | 1142          | 69             | 525327.3355   | 6.90E+01                 | 5.25E+05    | 69          | TRUE         | TRUE              |
| 1     | LYENQKQIA  | 898   | 906  | 9              | HLA-A*02:01 | 898           | 69             | 528968.7307   | 6.90E+01                 | 5.29E+05    | 69          | TRUE         | TRUE              |
| 1     | FHTINHFTG  | 69    | 77   | 9              | HLA-A*02:01 | 69            | 69             | 530188.1295   | 6.90E+01                 | 5.30E+05    | 69          | TRUE         | TRUE              |
| 1     | YDENGTITD  | 266   | 274  | 9              | HLA-A*02:01 | 266           | 69             | 530188.1295   | 6.90E+01                 | 5.30E+05    | 69          | TRUE         | TRUE              |
| 1     | TSQKSIWAY  | 669   | 677  | 9              | HLA-A*02:01 | 669           | 69             | 537563.781    | 6.90E+01                 | 5.38E+05    | 69          | TRUE         | TRUE              |
| 1     | CTDVSIAIH  | 603   | 611  | 9              | HLA-A*02:01 | 603           | 69             | 538802.9936   | 6.90E+01                 | 5.39E+05    | 69          | TRUE         | TRUE              |
| 1     | EHDVTSYEC  | 640   | 648  | 9              | HLA-A*02:01 | 640           | 69             | 543788.4763   | 6.90E+01                 | 5.44E+05    | 69          | TRUE         | TRUE              |
| 1     | NGT5WFITQ  | 1080  | 1088 | 9              | HLA-A*02:01 | 1080          | 69             | 547557.838    | 6.90E+01                 | 5.48E+05    | 69          | TRUE         | TRUE              |
| 1     | GKAYFPREG  | 1067  | 1075 | 9              | HLA-A*02:01 | 1067          | 69             | 550085.2501   | 6.90E+01                 | 5.50E+05    | 69          | TRUE         | TRUE              |
| 1     | PFAMQMAYR  | 879   | 887  | 9              | HLA-A*02:01 | 879           | 69             | 557737.6982   | 6.90E+01                 | 5.58E+05    | 69          | TRUE         | TRUE              |
| 1     | PDDFMGCVL  | 413   | 421  | 9              | HLA-A*02:01 | 413           | 69             | 559023.4164   | 6.90E+01                 | 5.59E+05    | 69          | TRUE         | TRUE              |
| 1     | SNVPFSPDG  | 456   | 464  | 9              | HLA-A*02:01 | 456           | 70             | 573363.4438   | 7.00E+01                 | 5.73E+05    | 70          | TRUE         | TRUE              |
| 1     | INTRNIDATS | 424   | 432  | 9              | HLA-A*02:01 | 424           | 70             | 584023.0661   | 7.00E+01                 | 5.84E+05    | 70          | TRUE         | TRUE              |
| 1     | HVTYVPSQE  | 1046  | 1054 | 9              | HLA-A*02:01 | 1046          | 70             | 585369.3783   | 7.00E+01                 | 5.85E+05    | 70          | TRUE         | TRUE              |
| 1     | AVSKPMGTQ  | 139   | 147  | 9              | HLA-A*02:01 | 139           | 70             | 586718.7941   | 7.00E+01                 | 5.87E+05    | 70          | TRUE         | TRUE              |
| 1     | PAWRIYSTG  | 617   | 625  | 9              | HLA-A*02:01 | 617           | 70             | 589426.965    | 7.00E+01                 | 5.89E+05    | 70          | TRUE         | TRUE              |
| 1     | TFSTFKCY   | 359   | 367  | 9              | HLA-A*02:01 | 359           | 70             | 592147.636    | 7.00E+01                 | 5.92E+05    | 70          | TRUE         | TRUE              |
| 1     | DENGITIDA  | 267   | 275  | 9              | HLA-A*02:01 | 267           | 70             | 596252.2076   | 7.00E+01                 | 5.96E+05    | 70          | TRUE         | TRUE              |
| 1     | SGINASVVN  | 1152  | 1160 | 9              | HLA-A*02:01 | 1152          | 70             | 599004.3827   | 7.00E+01                 | 5.99E+05    | 70          | TRUE         | TRUE              |
| 1     | APNYTQHTS  | 27    | 35   | 9              | HLA-A*02:01 | 27            | 70             | 600385.2304   | 7.00E+01                 | 6.00E+05    | 70          | TRUE         | TRUE              |
| 1     | SPDGKPCPT  | 461   | 469  | 9              | HLA-A*02:01 | 461           | 70             | 607337.364    | 7.00E+01                 | 6.07E+05    | 70          | TRUE         | TRUE              |
| 1     | SVKSFEIDK  | 289   | 297  | 9              | HLA-A*02:01 | 289           | 71             | 611547.2252   | 7.10E+01                 | 6.12E+05    | 71          | TRUE         | TRUE              |
| 1     | VDCNMVYCG  | 718   | 726  | 9              | HLA-A*02:01 | 718           | 71             | 614369.999    | 7.10E+01                 | 6.14E+05    | 71          | TRUE         | TRUE              |
| 1     | NNKSQSVII  | 108   | 116  | 9              | HLA-A*02:01 | 108           | 71             | 614369.999    | 7.10E+01                 | 6.14E+05    | 71          | TRUE         | TRUE              |
| 1     | SDFTSVDRD  | 556   | 564  | 9              | HLA-A*02:01 | 556           | 71             | 615786.2681   | 7.10E+01                 | 6.16E+05    | 71          | TRUE         | TRUE              |
| 1     | NQKQIANQF  | 901   | 909  | 9              | HLA-A*02:01 | 901           | 71             | 618628.6084   | 7.10E+01                 | 6.19E+05    | 71          | TRUE         | TRUE              |
| 1     | TQNVLYENQ  | 894   | 902  | 9              | HLA-A*02:01 | 894           | 71             | 622916.737    | 7.10E+01                 | 6.23E+05    | 71          | TRUE         | TRUE              |
| 1     | IGVTQNVLY  | 891   | 899  | 9              | HLA-A*02:01 | 891           | 71             | 624352.7084   | 7.10E+01                 | 6.24E+05    | 71          | TRUE         | TRUE              |
| 1     | VIPFKDGIY  | 80    | 88   | 9              | HLA-A*02:01 | 80            | 71             | 625791.99     | 7.10E+01                 | 6.26E+05    | 71          | TRUE         | TRUE              |
| 1     | LNCYWPLND  | 472   | 480  | 9              | HLA-A*02:01 | 472           | 71             | 627234.5896   | 7.10E+01                 | 6.27E+05    | 71          | TRUE         | TRUE              |
| 1     | EKSGNFKHL  | 174   | 182  | 9              | HLA-A*02:01 | 174           | 71             | 627234.5896   | 7.10E+01                 | 6.27E+05    | 71          | TRUE         | TRUE              |
| 1     | GFLYVYKGY  | 192   | 200  | 9              | HLA-A*02:01 | 192           | 71             | 627234.5896   | 7.10E+01                 | 6.27E+05    | 71          | TRUE         | TRUE              |
| 1     | WPLNDYGFY  | 476   | 484  | 9              | HLA-A*02:01 | 476           | 71             | 635960.2919   | 7.10E+01                 | 6.36E+05    | 71          | TRUE         | TRUE              |
| 1     | KPTTFMLKY  | 258   | 266  | 9              | HLA-A*02:01 | 258           | 71             | 638895.7512   | 7.10E+01                 | 6.39E+05    | 71          | TRUE         | TRUE              |
| 1     | LSTDLUKNQ  | 515   | 523  | 9              | HLA-A*02:01 | 515           | 71             | 641844.76     | 7.10E+01                 | 6.42E+05    | 71          | TRUE         | TRUE              |
| 1     | DAVDSCQNP  | 274   | 282  | 9              | HLA-A*02:01 | 274           | 71             | 644807.3808   | 7.10E+01                 | 6.45E+05    | 71          | TRUE         | TRUE              |
| 1     | DRCTTFDDV  | 17    | 25   | 9              | HLA-A*02:01 | 17            | 71             | 649276.9721   | 7.10E+01                 | 6.49E+05    | 71          | TRUE         | TRUE              |
| 1     | GSCKFDED   | 1233  | 1241 | 9              | HLA-A*02:01 | 1233          | 71             | 655284.6579   | 7.10E+01                 | 6.55E+05    | 71          | TRUE         | TRUE              |
| 1     | PKTSEILDI  | 565   | 573  | 9              | HLA-A*02:01 | 565           | 71             | 664400.5756   | 7.10E+01                 | 6.64E+05    | 71          | TRUE         | TRUE              |
| 1     | IDVVRDLPS  | 203   | 211  | 9              | HLA-A*02:01 | 203           | 72             | 665932.1771   | 7.20E+01                 | 6.66E+05    | 72          | TRUE         | TRUE              |
| 1     | AWRIYSTGN  | 618   | 626  | 9              | HLA-A*02:01 | 618           | 72             | 667467.3093   | 7.20E+01                 | 6.67E+05    | 72          | TRUE         | TRUE              |
| 1     | GYQPIDVVR  | 199   | 207  | 9              | HLA-A*02:01 | 199           | 72             | 676752.7045   | 7.20E+01                 | 6.77E+05    | 72          | TRUE         | TRUE              |
| 1     | SSEVAVLVY  | 591   | 599  | 9              | HLA-A*02:01 | 591           | 72             | 695712.81     | 7.20E+01                 | 6.96E+05    | 72          | TRUE         | TRUE              |
| 1     | ATEKSNVVR  | 91    | 99   | 9              | HLA-A*02:01 | 91            | 72             | 698924.0744   | 7.20E+01                 | 6.99E+05    | 72          | TRUE         | TRUE              |
| 1     | PNITNLCPF  | 317   | 325  | 9              | HLA-A*02:01 | 317           | 72             | 700535.2608   | 7.20E+01                 | 7.01E+05    | 72          | TRUE         | TRUE              |
| 1     | EVQIDRLIT  | 972   | 980  | 9              | HLA-A*02:01 | 972           | 72             | 710280.6771   | 7.20E+01                 | 7.10E+05    | 72          | TRUE         | TRUE              |
| 1     | TFGAGAAALQ | 869   | 877  | 9              | HLA-A*02:01 | 869           | 72             | 711918.0431   | 7.20E+01                 | 7.12E+05    | 72          | TRUE         | TRUE              |
| 1     | ATKLNDLCF  | 371   | 379  | 9              | HLA-A*02:01 | 371           | 72             | 716852.8232   | 7.20E+01                 | 7.17E+05    | 72          | TRUE         | TRUE              |
| 1     | MAKTSVDCN  | 713   | 721  | 9              | HLA-A*02:01 | 713           | 72             | 725153.5877   | 7.20E+01                 | 7.25E+05    | 72          | TRUE         | TRUE              |
| 1     | ISNVFSPSD  | 455   | 463  | 9              | HLA-A*02:01 | 455           | 72             | 725153.5877   | 7.20E+01                 | 7.25E+05    | 72          | TRUE         | TRUE              |
| 1     | KRVDFCGKG  | 1020  | 1028 | 9              | HLA-A*02:01 | 1020          | 72             | 725153.5877   | 7.20E+01                 | 7.25E+05    | 72          | TRUE         | TRUE              |
| 1     | RFNGIGVTQ  | 887   | 895  | 9              | HLA-A*02:01 | 887           | 73             | 730180.1123   | 7.30E+01                 | 7.30E+05    | 73          | TRUE         | TRUE              |
| 1     | RDVSDFTDS  | 553   | 561  | 9              | HLA-A*02:01 | 553           | 73             | 733550.4705   | 7.30E+01                 | 7.34E+05    | 73          | TRUE         | TRUE              |
| 1     | CNMYICGDS  | 720   | 728  | 9              | HLA-A*02:01 | 720           | 73             | 742044.5846   | 7.30E+01                 | 7.42E+05    | 73          | TRUE         | TRUE              |
| 1     | VSKPMGTQT  | 140   | 148  | 9              | HLA-A*02:01 | 140           | 73             | 743755.174    | 7.30E+01                 | 7.44E+05    | 73          | TRUE         | TRUE              |
| 1     | VFGSTMNNK  | 102   | 110  | 9              | HLA-A*02:01 | 102           | 73             | 748910.6386   | 7.30E+01                 | 7.49E+05    | 73          | TRUE         | TRUE              |
| 1     | INASVVNIQ  | 1154  | 1162 | 9              | HLA-A*02:01 | 1154          | 73             | 752367.4531   | 7.30E+01                 | 7.52E+05    | 73          | TRUE         | TRUE              |
| 1     | NFNGLTGTG  | 528   | 536  | 9              | HLA-A*02:01 | 528           | 73             | 752367.4531   | 7.30E+01                 | 7.52E+05    | 73          | TRUE         | TRUE              |
| 1     | TFEYISDAF  | 168   | 176  | 9              | HLA-A*02:01 | 168           | 73             | 755840.223    | 7.30E+01                 | 7.56E+05    | 73          | TRUE         | TRUE              |
| 1     | ACSCGSCCK  | 1229  | 1237 | 9              | HLA-A*02:01 | 1229          | 73             | 757582.615    | 7.30E+01                 | 7.58E+05    | 73          | TRUE         | TRUE              |
| 1     | IRAAEIRAS  | 995   | 1003 | 9              | HLA-A*02:01 | 995           | 73             | 769892.3424   | 7.30E+01                 | 7.70E+05    | 73          | TRUE         | TRUE              |
| 1     | GKLQDVVNQ  | 928   | 936  | 9              | HLA-A*02:01 | 928           | 73             | 771667.128    | 7.30E+01                 | 7.72E+05    | 73          | TRUE         | TRUE              |
| 1     | IGIINNVTY  | 1112  | 1120 | 9              | HLA-A*02:01 | 1112          | 73             | 773446.004    | 7.30E+01                 | 7.73E+05    | 73          | TRUE         | TRUE              |
| 1     | SNVVRGWVF  | 95    | 103  | 9              | HLA-A*02:01 | 95            | 73             | 777016.0685   | 7.30E+01                 | 7.77E+05    | 73          | TRUE         | TRUE              |
| 1     | APATVCGPK  | 506   | 514  | 9              | HLA-A*02:01 | 506           | 74             | 780602.6117   | 7.40E+01                 | 7.81E+05    | 74          | TRUE         | TRUE              |
| 1     | KRFQPFQOF  | 543   | 551  | 9              | HLA-A*02:01 | 543           | 74             | 806176.2506   | 7.40E+01                 | 8.06E+05    | 74          | TRUE         | TRUE              |
| 1     | DVQAPNYTQ  | 24    | 32   | 9              | HLA-A*02:01 | 24            | 74             | 808034.6788   | 7.40E+01                 | 8.08E+05    | 74          | TRUE         | TRUE              |
| 1     | NPFFFAVSKP | 135   | 143  | 9              | HLA-A*02:01 | 135           | 74             | 811764.397    | 7.40E+01                 | 8.12E+05    | 74          | TRUE         | TRUE              |
| 1     | ANLAATKMS  | 1004  | 1012 | 9              | HLA-A*02:01 | 1004          | 74             | 815511.3316   | 7.40E+01                 | 8.16E+05    | 74          | TRUE         | TRUE              |
| 1     | TSSMRGVVY  | 34    | 42   | 9              | HLA-A*02:01 | 34            | 74             | 817391.2794   | 7.40E+01                 | 8.17E+05    | 74          | TRUE         | TRUE              |
| 1     | NDLCLSNVY  | 375   | 383  | 9              | HLA-A*02:01 | 375           | 74             | 826856.2243   | 7.40E+01                 | 8.27E+05    | 74          | TRUE         | TRUE              |
| 1     | SDTLTYLTD  | 49    | 57   | 9              | HLA-A*02:01 | 49            | 74             | 836430.7682   | 7.40E+01                 | 8.36E+05    | 74          | TRUE         | TRUE              |
| 1     | LCPFGEVFN  | 322   | 330  | 9              | HLA-A*02:01 | 322           | 74             | 842228.6293   | 7.40E+01                 | 8.42E+05    | 74          | TRUE         | TRUE              |
| 1     | PPLLTDDMI  | 844   | 852  | 9              | HLA-A*02:01 | 844           | 74             | 844170.1668   | 7.40E+01                 | 8.44E+05    | 74          | TRUE         | TRUE              |
| 1     | VSDFTDSVR  | 555   | 563  | 9              | HLA-A*02:01 | 555           | 75             | 850021.675    | 7.50E+01                 | 8.50E+05    | 75          | TRUE         | TRUE              |
| 1     | EGVVFVNGT  | 1074  | 1082 | 9              | HLA-A*02:01 | 1074          | 75             | 855913.7436   | 7.50E+01                 | 8.56E+05    | 75          | TRUE         | TRUE              |
| 1     | NATKFP5VY  | 330   | 338  | 9              | HLA-A*02:01 | 330           | 75             | 857886.8286   | 7.50E+01                 | 8.58E+05    | 75          | TRUE         | TRUE              |
| 1     | VPSQERNFT  | 1050  | 1058 | 9              | HLA-A*02:01 | 1050          | 75             | 865824.7577   | 7.50E+01                 | 8.66E+05    | 75          | TRUE         | TRUE              |
| 1     | NFELCDNPF  | 129   | 137  | 9              | HLA-A*02:01 | 129           | 75             | 869821.2231   | 7.50E+01                 | 8.70E+05    | 75          | TRUE         | TRUE              |
| 1     | LRHGKLRPF  | 443   | 451  | 9              | HLA-A*02:01 | 443           | 75             | 885992.407    | 7.50E+01                 | 8.86E+05    | 75          | TRUE         | TRUE              |
| 1     | TRNIDATST  | 425   | 433  | 9              | HLA-A*02:01 | 425           | 75             | 885992.407    | 7.50E+01                 | 8.86E+05    | 75          | TRUE         | TRUE              |
| 1     | MPVSMMAKTS | 709   | 717  | 9              | HLA-A*02:01 | 709           | 75             | 896251.7156   | 7.50E+01                 | 8.96E+05    | 75          | TRUE         | TRUE              |
| 1     | VKQLSSNFG  | 945   | 953  | 9              | HLA-A*02:01 | 945           | 75             | 900388.6256   | 7.50E+01                 | 9.00E+05    | 75          | TRUE         | TRUE              |
| 1     | AICHGKAY   | 1062  | 1070 | 9              | HLA-A*02:01 | 1062          | 75             | 90038         |                          |             |             |              |                   |

| seq # | peptide    | start | end  | peptide length | allele      | peptide index | median binding | smmpmbec IC50 | smmpmbec p <sub>el</sub> | legacy IC50 | legacy rank | scores equal | percentiles equal |
|-------|------------|-------|------|----------------|-------------|---------------|----------------|---------------|--------------------------|-------------|-------------|--------------|-------------------|
| 1     | KNLNESLID  | 1173  | 1181 | 9              | HLA-A*02:01 | 1173          | 76             | 1017255.391   | 7.60E+01                 | 1.02E+06    | 76          | TRUE         | TRUE              |
| 1     | PIDVVRDLP  | 202   | 210  | 9              | HLA-A*02:01 | 202           | 76             | 1024306.668   | 7.60E+01                 | 1.02E+06    | 76          | TRUE         | TRUE              |
| 1     | YDLPPELD   | 1120  | 1128 | 9              | HLA-A*02:01 | 1120          | 77             | 1038556.193   | 7.70E+01                 | 1.04E+06    | 77          | TRUE         | TRUE              |
| 1     | OSLQTYVTQ  | 984   | 992  | 9              | HLA-A*02:01 | 984           | 77             | 1045755.121   | 7.70E+01                 | 1.05E+06    | 77          | TRUE         | TRUE              |
| 1     | NHSTSPVDL  | 1140  | 1148 | 9              | HLA-A*02:01 | 1140          | 77             | 1055431.374   | 7.70E+01                 | 1.06E+06    | 77          | TRUE         | TRUE              |
| 1     | TECANLLLO  | 729   | 737  | 9              | HLA-A*02:01 | 729           | 77             | 1055431.374   | 7.70E+01                 | 1.06E+06    | 77          | TRUE         | TRUE              |
| 1     | LTPSSKRFRQ | 538   | 546  | 9              | HLA-A*02:01 | 538           | 77             | 1057864.395   | 7.70E+01                 | 1.06E+06    | 77          | TRUE         | TRUE              |
| 1     | VYKGYPQID  | 196   | 204  | 9              | HLA-A*02:01 | 196           | 77             | 1060303.024   | 7.70E+01                 | 1.06E+06    | 77          | TRUE         | TRUE              |
| 1     | TDNTFVSGN  | 1099  | 1107 | 9              | HLA-A*02:01 | 1099          | 77             | 1067652.693   | 7.70E+01                 | 1.07E+06    | 77          | TRUE         | TRUE              |
| 1     | ADQLTPAWR  | 612   | 620  | 9              | HLA-A*02:01 | 612           | 77             | 1110273.566   | 7.70E+01                 | 1.11E+06    | 77          | TRUE         | TRUE              |
| 1     | NFSISITTE  | 699   | 707  | 9              | HLA-A*02:01 | 699           | 77             | 1110273.566   | 7.70E+01                 | 1.11E+06    | 77          | TRUE         | TRUE              |
| 1     | GEVFNATFK  | 326   | 334  | 9              | HLA-A*02:01 | 326           | 78             | 1123129.928   | 7.80E+01                 | 1.12E+06    | 78          | TRUE         | TRUE              |
| 1     | QDVNCTDVS  | 599   | 607  | 9              | HLA-A*02:01 | 599           | 78             | 1136135.16    | 7.80E+01                 | 1.14E+06    | 78          | TRUE         | TRUE              |
| 1     | TPTLKYFGG  | 773   | 781  | 9              | HLA-A*02:01 | 773           | 78             | 1138754.22    | 7.80E+01                 | 1.14E+06    | 78          | TRUE         | TRUE              |
| 1     | EELDKYFKN  | 1132  | 1140 | 9              | HLA-A*02:01 | 1132          | 78             | 1141379.321   | 7.80E+01                 | 1.14E+06    | 78          | TRUE         | TRUE              |
| 1     | DRNTRVFVA  | 757   | 765  | 9              | HLA-A*02:01 | 757           | 78             | 1149290.985   | 7.80E+01                 | 1.15E+06    | 78          | TRUE         | TRUE              |
| 1     | DYGFYTTTG  | 480   | 488  | 9              | HLA-A*02:01 | 480           | 78             | 1154595.871   | 7.80E+01                 | 1.15E+06    | 78          | TRUE         | TRUE              |
| 1     | PLKPTKRFS  | 791   | 799  | 9              | HLA-A*02:01 | 791           | 78             | 1176061.411   | 7.80E+01                 | 1.18E+06    | 78          | TRUE         | TRUE              |
| 1     | VKSFEIDKG  | 290   | 298  | 9              | HLA-A*02:01 | 290           | 78             | 1181489.864   | 7.80E+01                 | 1.18E+06    | 78          | TRUE         | TRUE              |
| 1     | NFNFNGLTG  | 526   | 534  | 9              | HLA-A*02:01 | 526           | 78             | 1195170.871   | 7.80E+01                 | 1.20E+06    | 78          | TRUE         | TRUE              |
| 1     | PVLKGVKLH  | 1245  | 1253 | 9              | HLA-A*02:01 | 1245          | 78             | 1197926.025   | 7.80E+01                 | 1.20E+06    | 78          | TRUE         | TRUE              |
| 1     | DIPIGAGIC  | 649   | 657  | 9              | HLA-A*02:01 | 649           | 78             | 1286555.135   | 7.80E+01                 | 1.23E+06    | 78          | TRUE         | TRUE              |
| 1     | ERKKSNVCV  | 341   | 349  | 9              | HLA-A*02:01 | 341           | 78             | 1286555.135   | 7.80E+01                 | 1.23E+06    | 78          | TRUE         | TRUE              |
| 1     | GDDVRQJAP  | 391   | 399  | 9              | HLA-A*02:01 | 391           | 79             | 1242882.291   | 7.90E+01                 | 1.24E+06    | 79          | TRUE         | TRUE              |
| 1     | GAEHVDTSY  | 638   | 646  | 9              | HLA-A*02:01 | 638           | 79             | 1260172.506   | 7.90E+01                 | 1.26E+06    | 79          | TRUE         | TRUE              |
| 1     | TDSVRDPKT  | 559   | 567  | 9              | HLA-A*02:01 | 559           | 79             | 1268907.604   | 7.90E+01                 | 1.27E+06    | 79          | TRUE         | TRUE              |
| 1     | QAGCLIGAE  | 632   | 640  | 9              | HLA-A*02:01 | 632           | 79             | 1286559.867   | 7.90E+01                 | 1.29E+06    | 79          | TRUE         | TRUE              |
| 1     | GNPVIPFKD  | 77    | 85   | 9              | HLA-A*02:01 | 77            | 79             | 1292498.358   | 7.90E+01                 | 1.29E+06    | 79          | TRUE         | TRUE              |
| 1     | QFGRDVSDF  | 550   | 558  | 9              | HLA-A*02:01 | 550           | 79             | 1304457.698   | 7.90E+01                 | 1.30E+06    | 79          | TRUE         | TRUE              |
| 1     | SSKRQFPQF  | 541   | 549  | 9              | HLA-A*02:01 | 541           | 79             | 1304457.698   | 7.90E+01                 | 1.30E+06    | 79          | TRUE         | TRUE              |
| 1     | DAFSLDVSE  | 166   | 174  | 9              | HLA-A*02:01 | 166           | 79             | 1313499.767   | 7.90E+01                 | 1.31E+06    | 79          | TRUE         | TRUE              |
| 1     | TYVTQQIUR  | 988   | 996  | 9              | HLA-A*02:01 | 988           | 79             | 1319562.606   | 7.90E+01                 | 1.32E+06    | 79          | TRUE         | TRUE              |
| 1     | VVNIQKEID  | 1158  | 1166 | 9              | HLA-A*02:01 | 1158          | 79             | 1328709.377   | 7.90E+01                 | 1.33E+06    | 79          | TRUE         | TRUE              |
| 1     | VDFCGKGVH  | 1022  | 1030 | 9              | HLA-A*02:01 | 1022          | 79             | 1350299.168   | 7.90E+01                 | 1.35E+06    | 79          | TRUE         | TRUE              |
| 1     | RNTRVFAQ   | 758   | 766  | 9              | HLA-A*02:01 | 758           | 79             | 1369083.7     | 7.90E+01                 | 1.37E+06    | 79          | TRUE         | TRUE              |
| 1     | DDVQAPNYT  | 23    | 31   | 9              | HLA-A*02:01 | 23            | 80             | 1372239.764   | 8.00E+01                 | 1.37E+06    | 80          | TRUE         | TRUE              |
| 1     | ADAGFMKQY  | 811   | 819  | 9              | HLA-A*02:01 | 811           | 80             | 1375403.104   | 8.00E+01                 | 1.38E+06    | 80          | TRUE         | TRUE              |
| 1     | AYTMSLGAD  | 676   | 684  | 9              | HLA-A*02:01 | 676           | 80             | 1436911.432   | 8.00E+01                 | 1.44E+06    | 80          | TRUE         | TRUE              |
| 1     | SVRDPKSTE  | 561   | 569  | 9              | HLA-A*02:01 | 561           | 80             | 1443543.914   | 8.00E+01                 | 1.44E+06    | 80          | TRUE         | TRUE              |
| 1     | NPLAELKCS  | 281   | 289  | 9              | HLA-A*02:01 | 281           | 80             | 1490836.442   | 8.00E+01                 | 1.49E+06    | 80          | TRUE         | TRUE              |
| 1     | EPVLKGVKL  | 1244  | 1252 | 9              | HLA-A*02:01 | 1244          | 81             | 1504630.981   | 8.10E+01                 | 1.50E+06    | 81          | TRUE         | TRUE              |
| 1     | SFKEELDKY  | 1129  | 1137 | 9              | HLA-A*02:01 | 1129          | 81             | 1511576.042   | 8.10E+01                 | 1.51E+06    | 81          | TRUE         | TRUE              |
| 1     | VCGPKLSTD  | 510   | 518  | 9              | HLA-A*02:01 | 510           | 81             | 1511576.042   | 8.10E+01                 | 1.51E+06    | 81          | TRUE         | TRUE              |
| 1     | CHEGKAYFP  | 1064  | 1072 | 9              | HLA-A*02:01 | 1064          | 81             | 1536137.177   | 8.10E+01                 | 1.54E+06    | 81          | TRUE         | TRUE              |
| 1     | CSCLKGACS  | 1223  | 1231 | 9              | HLA-A*02:01 | 1223          | 81             | 1539678.339   | 8.10E+01                 | 1.54E+06    | 81          | TRUE         | TRUE              |
| 1     | PPALNCYWP  | 469   | 477  | 9              | HLA-A*02:01 | 469           | 81             | 1561097.399   | 8.10E+01                 | 1.56E+06    | 81          | TRUE         | TRUE              |
| 1     | KPCTPPALN  | 465   | 473  | 9              | HLA-A*02:01 | 465           | 81             | 1568303.097   | 8.10E+01                 | 1.57E+06    | 81          | TRUE         | TRUE              |
| 1     | TSEILDISP  | 567   | 575  | 9              | HLA-A*02:01 | 567           | 81             | 1571918.409   | 8.10E+01                 | 1.57E+06    | 81          | TRUE         | TRUE              |
| 1     | VNQNAQALN  | 934   | 942  | 9              | HLA-A*02:01 | 934           | 81             | 1579174.054   | 8.10E+01                 | 1.58E+06    | 81          | TRUE         | TRUE              |
| 1     | PSSKRFPQF  | 540   | 548  | 9              | HLA-A*02:01 | 540           | 81             | 1615957.743   | 8.10E+01                 | 1.62E+06    | 81          | TRUE         | TRUE              |
| 1     | GRQLSLQTY  | 981   | 989  | 9              | HLA-A*02:01 | 981           | 81             | 1623416.666   | 8.10E+01                 | 1.62E+06    | 81          | TRUE         | TRUE              |
| 1     | DKYFKNNHS  | 1135  | 1143 | 9              | HLA-A*02:01 | 1135          | 81             | 1627159.027   | 8.10E+01                 | 1.63E+06    | 81          | TRUE         | TRUE              |
| 1     | ARDUCAQK   | 828   | 836  | 9              | HLA-A*02:01 | 828           | 82             | 1699925.936   | 8.20E+01                 | 1.70E+06    | 82          | TRUE         | TRUE              |
| 1     | TGVIADYNY  | 402   | 410  | 9              | HLA-A*02:01 | 402           | 82             | 1719610.15    | 8.20E+01                 | 1.72E+06    | 82          | TRUE         | TRUE              |
| 1     | NYKLDDDFM  | 409   | 417  | 9              | HLA-A*02:01 | 409           | 82             | 1763721.463   | 8.20E+01                 | 1.76E+06    | 82          | TRUE         | TRUE              |
| 1     | SCGSCCKDF  | 1231  | 1239 | 9              | HLA-A*02:01 | 1231          | 83             | 1804803.814   | 8.30E+01                 | 1.80E+06    | 83          | TRUE         | TRUE              |
| 1     | KEELDKYFK  | 1131  | 1139 | 9              | HLA-A*02:01 | 1131          | 83             | 1813134.41    | 8.30E+01                 | 1.81E+06    | 83          | TRUE         | TRUE              |
| 1     | TPSSKRFPQ  | 539   | 547  | 9              | HLA-A*02:01 | 539           | 83             | 1821503.458   | 8.30E+01                 | 1.82E+06    | 83          | TRUE         | TRUE              |
| 1     | ECLGDINAR  | 821   | 829  | 9              | HLA-A*02:01 | 821           | 83             | 1821503.458   | 8.30E+01                 | 1.82E+06    | 83          | TRUE         | TRUE              |
| 1     | LDKYFKNHT  | 1134  | 1142 | 9              | HLA-A*02:01 | 1134          | 83             | 1834129.517   | 8.30E+01                 | 1.83E+06    | 83          | TRUE         | TRUE              |
| 1     | VSVITPGTN  | 581   | 589  | 9              | HLA-A*02:01 | 581           | 83             | 1838357.622   | 8.30E+01                 | 1.84E+06    | 83          | TRUE         | TRUE              |
| 1     | CGKGYHMLS  | 1025  | 1033 | 9              | HLA-A*02:01 | 1025          | 83             | 1872535.242   | 8.30E+01                 | 1.87E+06    | 83          | TRUE         | TRUE              |
| 1     | NNSTNVVIR  | 118   | 126  | 9              | HLA-A*02:01 | 118           | 83             | 1911745.163   | 8.30E+01                 | 1.91E+06    | 83          | TRUE         | TRUE              |
| 1     | IDLQELGKY  | 1180  | 1188 | 9              | HLA-A*02:01 | 1180          | 83             | 1924996.747   | 8.30E+01                 | 1.92E+06    | 83          | TRUE         | TRUE              |
| 1     | CKFDEDDSE  | 1236  | 1244 | 9              | HLA-A*02:01 | 1236          | 83             | 1933882.129   | 8.30E+01                 | 1.93E+06    | 83          | TRUE         | TRUE              |
| 1     | WERKKISNC  | 340   | 348  | 9              | HLA-A*02:01 | 340           | 83             | 1956275.428   | 8.30E+01                 | 1.96E+06    | 83          | TRUE         | TRUE              |
| 1     | NKVTLDADG  | 806   | 814  | 9              | HLA-A*02:01 | 806           | 83             | 1965305.185   | 8.30E+01                 | 1.97E+06    | 83          | TRUE         | TRUE              |
| 1     | CGDSTECAN  | 725   | 733  | 9              | HLA-A*02:01 | 725           | 84             | 1974376.622   | 8.40E+01                 | 1.97E+06    | 84          | TRUE         | TRUE              |
| 1     | CSVKSFEID  | 288   | 296  | 9              | HLA-A*02:01 | 288           | 84             | 1978928.03    | 8.40E+01                 | 1.98E+06    | 84          | TRUE         | TRUE              |
| 1     | QSKRVDFCG  | 1018  | 1026 | 9              | HLA-A*02:01 | 1018          | 84             | 2034370.268   | 8.40E+01                 | 2.03E+06    | 84          | TRUE         | TRUE              |
| 1     | GRDVSDFTD  | 552   | 560  | 9              | HLA-A*02:01 | 552           | 84             | 2057927.165   | 8.40E+01                 | 2.06E+06    | 84          | TRUE         | TRUE              |
| 1     | ASVNVNIQKE | 1156  | 1164 | 9              | HLA-A*02:01 | 1156          | 84             | 2072192.035   | 8.40E+01                 | 2.07E+06    | 84          | TRUE         | TRUE              |
| 1     | DCNMVYICGD | 719   | 727  | 9              | HLA-A*02:01 | 719           | 84             | 2086555.784   | 8.40E+01                 | 2.09E+06    | 84          | TRUE         | TRUE              |
| 1     | IDATSTGNY  | 428   | 436  | 9              | HLA-A*02:01 | 428           | 84             | 2091365.792   | 8.40E+01                 | 2.09E+06    | 84          | TRUE         | TRUE              |
| 1     | RYLRHNGKLR | 441   | 449  | 9              | HLA-A*02:01 | 441           | 84             | 2110716.961   | 8.40E+01                 | 2.11E+06    | 84          | TRUE         | TRUE              |
| 1     | APAICHEGK  | 1060  | 1068 | 9              | HLA-A*02:01 | 1060          | 84             | 2159881.875   | 8.40E+01                 | 2.16E+06    | 84          | TRUE         | TRUE              |
| 1     | KPTKRFSIE  | 793   | 801  | 9              | HLA-A*02:01 | 793           | 84             | 2164860.917   | 8.40E+01                 | 2.16E+06    | 84          | TRUE         | TRUE              |
| 1     | TGNNVFQTQ  | 624   | 632  | 9              | HLA-A*02:01 | 624           | 85             | 2215287.005   | 8.50E+01                 | 2.22E+06    | 85          | TRUE         | TRUE              |
| 1     | TYVPSQERN  | 1048  | 1056 | 9              | HLA-A*02:01 | 1048          | 85             | 2220393.769   | 8.50E+01                 | 2.22E+06    | 85          | TRUE         | TRUE              |
| 1     | TGRLQSLQT  | 980   | 988  | 9              | HLA-A*02:01 | 980           | 85             | 2220393.769   | 8.50E+01                 | 2.22E+06    | 85          | TRUE         | TRUE              |
| 1     | NNNTIAPTIN | 691   | 699  | 9              | HLA-A*02:01 | 691           | 85             | 2230642.641   | 8.50E+01                 | 2.23E+06    | 85          | TRUE         | TRUE              |
| 1     | AEHVDTSYE  | 639   | 647  | 9              | HLA-A*02:01 | 639           | 85             | 2240938.82    | 8.50E+01                 | 2.24E+06    | 85          | TRUE         | TRUE              |
| 1     | LAELKCSVK  | 283   | 291  | 9              | HLA-A*02:01 | 283           | 85             | 2246104.718   | 8.50E+01                 | 2.25E+06    | 85          | TRUE         | TRUE              |
| 1     | VSTAIHADQ  | 606   | 614  | 9              | HLA-A*02:01 | 606           | 85             | 2246104.718   | 8.50E+01                 | 2.25E+06    | 85          | TRUE         | TRUE              |
| 1     | VRQIAPGQT  | 394   | 402  | 9              | HLA-A*02:01 | 394           | 85             | 2266887.669   | 8.50E+01                 | 2.27E+06    | 85          | TRUE         | TRUE              |
| 1     | LNLDLSRLD  | 959   | 967  | 9              | HLA-A*02:01 | 959           | 85             | 2277351.147   | 8.50E+01                 | 2.28E+06    | 85          | TRUE         | TRUE              |
| 1     | NCYWPPLNDY | 473   | 481  | 9              | HLA-A*02:01 | 473           | 85             | 2282600.983   | 8.50E+01                 | 2.28E+06    | 85          | TRUE         | TRUE              |
| 1     | LNESLIDLO  | 1175  | 1183 | 9              | HLA-A*02:01 | 1175          | 85             | 2282600.983   | 8.50E+01                 | 2.28E+06    | 85          | TRUE         | TRUE              |
| 1     | SPCSFGGVS  | 574   | 582  | 9              | HLA-A*02:01 | 574           | 85             | 2335769.59    | 8.50E+01                 | 2.34E+06    | 85          | TRUE         | TRUE              |
| 1     | YGECLDGIN  | 819   | 827  | 9              | HLA-A*02:01 | 819           | 85             | 2341154.095   | 8.50E+01                 | 2.34E+06    | 85          | TRUE         | TRUE              |
| 1     | HTSSMRGVY  | 33    | 41   | 9              | HLA-A*02:01 | 33            | 85             | 2362816.527   | 8.50E+01                 | 2.36E+06    | 85          | TRUE         | TRUE              |
| 1     | AGCLUGAEH  | 63    |      |                |             |               |                |               |                          |             |             |              |                   |

| seq # | peptide    | start | end  | peptide length | allele      | peptide index | median binding | smmpmbec IC <sub>50</sub> | smmpmbec p <sub>el</sub> | legacy IC <sub>50</sub> | legacy rank | scores equal | percentiles equal |
|-------|------------|-------|------|----------------|-------------|---------------|----------------|---------------------------|--------------------------|-------------------------|-------------|--------------|-------------------|
| 1     | CGSCCKDFE  | 1232  | 1240 | 9              | HLA-A*02:01 | 1232          | 86             | 2543489.798               | 8.60E+01                 | 2.54E+06                | 86          | TRUE         | TRUE              |
| 1     | AEQDRNTR   | 754   | 762  | 9              | HLA-A*02:01 | 754           | 86             | 2561120.427               | 8.60E+01                 | 2.56E+06                | 86          | TRUE         | TRUE              |
| 1     | DTSYCEDPI  | 643   | 651  | 9              | HLA-A*02:01 | 643           | 86             | 2561120.427               | 8.60E+01                 | 2.56E+06                | 86          | TRUE         | TRUE              |
| 1     | ADSFVVKGD  | 384   | 392  | 9              | HLA-A*02:01 | 384           | 86             | 2572942.022               | 8.60E+01                 | 2.57E+06                | 86          | TRUE         | TRUE              |
| 1     | VNIQKEIDR  | 1159  | 1167 | 9              | HLA-A*02:01 | 1159          | 86             | 2584818.183               | 8.60E+01                 | 2.58E+06                | 86          | TRUE         | TRUE              |
| 1     | HGKLRPFER  | 445   | 453  | 9              | HLA-A*02:01 | 445           | 86             | 2596749.161               | 8.60E+01                 | 2.60E+06                | 86          | TRUE         | TRUE              |
| 1     | PTTFMLKYD  | 259   | 267  | 9              | HLA-A*02:01 | 259           | 86             | 2645026.332               | 8.60E+01                 | 2.65E+06                | 86          | TRUE         | TRUE              |
| 1     | FNKAISQIQ  | 909   | 917  | 9              | HLA-A*02:01 | 909           | 86             | 2651123.748               | 8.60E+01                 | 2.65E+06                | 86          | TRUE         | TRUE              |
| 1     | QERNFTTAP  | 1053  | 1061 | 9              | HLA-A*02:01 | 1053          | 86             | 2688004.55                | 8.60E+01                 | 2.69E+06                | 86          | TRUE         | TRUE              |
| 1     | LSGIAAEQD  | 749   | 757  | 9              | HLA-A*02:01 | 749           | 86             | 2750616.222               | 8.60E+01                 | 2.75E+06                | 86          | TRUE         | TRUE              |
| 1     | REFVFNKND  | 183   | 191  | 9              | HLA-A*02:01 | 183           | 87             | 2756957.048               | 8.70E+01                 | 2.76E+06                | 87          | TRUE         | TRUE              |
| 1     | KYRYLRHGK  | 439   | 447  | 9              | HLA-A*02:01 | 439           | 87             | 2795310.141               | 8.70E+01                 | 2.80E+06                | 87          | TRUE         | TRUE              |
| 1     | NNTVYDPLQ  | 1116  | 1124 | 9              | HLA-A*02:01 | 1116          | 87             | 2827678.306               | 8.70E+01                 | 2.83E+06                | 87          | TRUE         | TRUE              |
| 1     | LGQSKRVDF  | 1016  | 1024 | 9              | HLA-A*02:01 | 1016          | 87             | 2906899.385               | 8.70E+01                 | 2.91E+06                | 87          | TRUE         | TRUE              |
| 1     | PYRVVLSF   | 493   | 501  | 9              | HLA-A*02:01 | 493           | 87             | 2940559.693               | 8.70E+01                 | 2.94E+06                | 87          | TRUE         | TRUE              |
| 1     | SKPMGTQTH  | 141   | 149  | 9              | HLA-A*02:01 | 141           | 87             | 2967768.357               | 8.70E+01                 | 2.97E+06                | 87          | TRUE         | TRUE              |
| 1     | MRGVVYPDE  | 37    | 45   | 9              | HLA-A*02:01 | 37            | 87             | 2988339.94                | 8.70E+01                 | 2.99E+06                | 87          | TRUE         | TRUE              |
| 1     | DVRQIAPGQ  | 393   | 401  | 9              | HLA-A*02:01 | 393           | 87             | 3009054.128               | 8.70E+01                 | 3.01E+06                | 87          | TRUE         | TRUE              |
| 1     | AAERISAN   | 997   | 1005 | 9              | HLA-A*02:01 | 997           | 87             | 3036896.563               | 8.70E+01                 | 3.04E+06                | 87          | TRUE         | TRUE              |
| 1     | EDLFFNKVT  | 801   | 809  | 9              | HLA-A*02:01 | 801           | 87             | 3050914.24                | 8.70E+01                 | 3.05E+06                | 87          | TRUE         | TRUE              |
| 1     | SEKSGNFKH  | 173   | 181  | 9              | HLA-A*02:01 | 173           | 88             | 3180021.088               | 8.80E+01                 | 3.18E+06                | 88          | TRUE         | TRUE              |
| 1     | TDADVDCSQN | 273   | 281  | 9              | HLA-A*02:01 | 273           | 88             | 3180021.088               | 8.80E+01                 | 3.18E+06                | 88          | TRUE         | TRUE              |
| 1     | SKRFQPFQQ  | 542   | 550  | 9              | HLA-A*02:01 | 542           | 88             | 3187351.794               | 8.80E+01                 | 3.19E+06                | 88          | TRUE         | TRUE              |
| 1     | QELGKYEQY  | 1183  | 1191 | 9              | HLA-A*02:01 | 1183          | 88             | 3187351.794               | 8.80E+01                 | 3.19E+06                | 88          | TRUE         | TRUE              |
| 1     | ANQFNKAIS  | 906   | 914  | 9              | HLA-A*02:01 | 906           | 88             | 3216843.997               | 8.80E+01                 | 3.22E+06                | 88          | TRUE         | TRUE              |
| 1     | NNVFQTQAG  | 626   | 634  | 9              | HLA-A*02:01 | 626           | 88             | 3239142.094               | 8.80E+01                 | 3.24E+06                | 88          | TRUE         | TRUE              |
| 1     | WRIYSTGNN  | 619   | 627  | 9              | HLA-A*02:01 | 619           | 88             | 3329890.865               | 8.80E+01                 | 3.33E+06                | 88          | TRUE         | TRUE              |
| 1     | SPQIITDNT  | 1093  | 1101 | 9              | HLA-A*02:01 | 1093          | 88             | 3376214.261               | 8.80E+01                 | 3.38E+06                | 88          | TRUE         | TRUE              |
| 1     | ERDISNVFP  | 452   | 460  | 9              | HLA-A*02:01 | 452           | 88             | 3383997.239               | 8.80E+01                 | 3.38E+06                | 88          | TRUE         | TRUE              |
| 1     | DDVRQIAPG  | 392   | 400  | 9              | HLA-A*02:01 | 392           | 88             | 3423182.08                | 8.80E+01                 | 3.42E+06                | 88          | TRUE         | TRUE              |
| 1     | TGVLTPSSK  | 535   | 543  | 9              | HLA-A*02:01 | 535           | 88             | 3470803.286               | 8.80E+01                 | 3.47E+06                | 88          | TRUE         | TRUE              |
| 1     | REVFAQVKK  | 761   | 769  | 9              | HLA-A*02:01 | 761           | 88             | 3494861.745               | 8.80E+01                 | 3.49E+06                | 88          | TRUE         | TRUE              |
| 1     | DAGFMQYQG  | 812   | 820  | 9              | HLA-A*02:01 | 812           | 89             | 3551648.681               | 8.90E+01                 | 3.55E+06                | 89          | TRUE         | TRUE              |
| 1     | QVQGMYYTP  | 766   | 774  | 9              | HLA-A*02:01 | 766           | 89             | 3642755.311               | 8.90E+01                 | 3.64E+06                | 89          | TRUE         | TRUE              |
| 1     | TGNYNYKYR  | 433   | 441  | 9              | HLA-A*02:01 | 433           | 89             | 3642755.311               | 8.90E+01                 | 3.64E+06                | 89          | TRUE         | TRUE              |
| 1     | LDSFKEELD  | 1127  | 1135 | 9              | HLA-A*02:01 | 1127          | 89             | 3684936.429               | 8.90E+01                 | 3.68E+06                | 89          | TRUE         | TRUE              |
| 1     | VPFSPDGPK  | 458   | 466  | 9              | HLA-A*02:01 | 458           | 89             | 3710479.188               | 8.90E+01                 | 3.71E+06                | 89          | TRUE         | TRUE              |
| 1     | EKSNVVRGW  | 93    | 101  | 9              | HLA-A*02:01 | 93            | 89             | 3894305.339               | 8.90E+01                 | 3.89E+06                | 89          | TRUE         | TRUE              |
| 1     | VSEKSGNFK  | 172   | 180  | 9              | HLA-A*02:01 | 172           | 89             | 3921299.374               | 8.90E+01                 | 3.92E+06                | 89          | TRUE         | TRUE              |
| 1     | LGKYEQYIK  | 1185  | 1193 | 9              | HLA-A*02:01 | 1185          | 89             | 4077838.295               | 8.90E+01                 | 4.08E+06                | 89          | TRUE         | TRUE              |
| 1     | SKRVDFCGK  | 1019  | 1027 | 9              | HLA-A*02:01 | 1019          | 89             | 4077838.295               | 8.90E+01                 | 4.08E+06                | 89          | TRUE         | TRUE              |
| 1     | TEKSNVVRG  | 92    | 100  | 9              | HLA-A*02:01 | 92            | 90             | 4182442.702               | 9.00E+01                 | 4.18E+06                | 90          | TRUE         | TRUE              |
| 1     | CDVVIIGIN  | 1108  | 1116 | 9              | HLA-A*02:01 | 1108          | 90             | 4192084.228               | 9.00E+01                 | 4.19E+06                | 90          | TRUE         | TRUE              |
| 1     | AAEQDRNTR  | 753   | 761  | 9              | HLA-A*02:01 | 753           | 90             | 4250401.93                | 9.00E+01                 | 4.25E+06                | 90          | TRUE         | TRUE              |
| 1     | QKQIANQFN  | 902   | 910  | 9              | HLA-A*02:01 | 902           | 90             | 4379555.154               | 9.00E+01                 | 4.38E+06                | 90          | TRUE         | TRUE              |
| 1     | PFSPOGKPC  | 459   | 467  | 9              | HLA-A*02:01 | 459           | 90             | 4389651.071               | 9.00E+01                 | 4.39E+06                | 90          | TRUE         | TRUE              |
| 1     | GKRLRPFER  | 446   | 454  | 9              | HLA-A*02:01 | 446           | 90             | 4389651.071               | 9.00E+01                 | 4.39E+06                | 90          | TRUE         | TRUE              |
| 1     | NCTFEYISD  | 158   | 166  | 9              | HLA-A*02:01 | 158           | 90             | 4460977.163               | 9.00E+01                 | 4.46E+06                | 90          | TRUE         | TRUE              |
| 1     | DDSEPLVLK  | 1241  | 1249 | 9              | HLA-A*02:01 | 1241          | 90             | 4481568.098               | 9.00E+01                 | 4.48E+06                | 90          | TRUE         | TRUE              |
| 1     | AWERKKISN  | 339   | 347  | 9              | HLA-A*02:01 | 339           | 90             | 4523035.537               | 9.00E+01                 | 4.52E+06                | 90          | TRUE         | TRUE              |
| 1     | DATSTGNYN  | 429   | 437  | 9              | HLA-A*02:01 | 429           | 90             | 4649754.249               | 9.00E+01                 | 4.65E+06                | 90          | TRUE         | TRUE              |
| 1     | DGIYFAATE  | 85    | 93   | 9              | HLA-A*02:01 | 85            | 91             | 4902639.952               | 9.10E+01                 | 4.90E+06                | 91          | TRUE         | TRUE              |
| 1     | PGQTGVADI  | 399   | 407  | 9              | HLA-A*02:01 | 399           | 91             | 5005298.701               | 9.10E+01                 | 5.01E+06                | 91          | TRUE         | TRUE              |
| 1     | KNHTSPDVD  | 1139  | 1147 | 9              | HLA-A*02:01 | 1139          | 91             | 5051612.16                | 9.10E+01                 | 5.05E+06                | 91          | TRUE         | TRUE              |
| 1     | NFRVVPSPG  | 304   | 312  | 9              | HLA-A*02:01 | 304           | 91             | 5157390.311               | 9.10E+01                 | 5.16E+06                | 91          | TRUE         | TRUE              |
| 1     | NKAISQIQE  | 910   | 918  | 9              | HLA-A*02:01 | 910           | 91             | 5181195.743               | 9.10E+01                 | 5.18E+06                | 91          | TRUE         | TRUE              |
| 1     | DFTDSVRDP  | 557   | 565  | 9              | HLA-A*02:01 | 557           | 91             | 5229136.757               | 9.10E+01                 | 5.23E+06                | 91          | TRUE         | TRUE              |
| 1     | LDVSEKSGN  | 170   | 178  | 9              | HLA-A*02:01 | 170           | 91             | 5289687.31                | 9.10E+01                 | 5.29E+06                | 91          | TRUE         | TRUE              |
| 1     | RCTTFDDVQ  | 18    | 26   | 9              | HLA-A*02:01 | 18            | 91             | 5326353.67                | 9.10E+01                 | 5.33E+06                | 91          | TRUE         | TRUE              |
| 1     | SECVLGQSK  | 1012  | 1020 | 9              | HLA-A*02:01 | 1012          | 91             | 5475578.38                | 9.10E+01                 | 5.48E+06                | 91          | TRUE         | TRUE              |
| 1     | QNPLAELCK  | 280   | 288  | 9              | HLA-A*02:01 | 280           | 92             | 5513533.276               | 9.20E+01                 | 5.51E+06                | 92          | TRUE         | TRUE              |
| 1     | PNYTQHTSS  | 28    | 36   | 9              | HLA-A*02:01 | 28            | 92             | 5707290.781               | 9.20E+01                 | 5.71E+06                | 92          | TRUE         | TRUE              |
| 1     | QPQOQGRD   | 546   | 554  | 9              | HLA-A*02:01 | 546           | 92             | 5786687.105               | 9.20E+01                 | 5.79E+06                | 92          | TRUE         | TRUE              |
| 1     | PSGFNTLKP  | 210   | 218  | 9              | HLA-A*02:01 | 210           | 92             | 6017692.613               | 9.20E+01                 | 6.02E+06                | 92          | TRUE         | TRUE              |
| 1     | PTKRSFIED  | 794   | 802  | 9              | HLA-A*02:01 | 794           | 92             | 6059405.266               | 9.20E+01                 | 6.06E+06                | 92          | TRUE         | TRUE              |
| 1     | GSTMNNKSK  | 104   | 112  | 9              | HLA-A*02:01 | 104           | 92             | 6129569.872               | 9.20E+01                 | 6.13E+06                | 92          | TRUE         | TRUE              |
| 1     | QNVLYENQK  | 895   | 903  | 9              | HLA-A*02:01 | 895           | 92             | 6186286.084               | 9.20E+01                 | 6.19E+06                | 92          | TRUE         | TRUE              |
| 1     | NEVAKNLNE  | 1169  | 1177 | 9              | HLA-A*02:01 | 1169          | 93             | 6374263.318               | 9.30E+01                 | 6.37E+06                | 93          | TRUE         | TRUE              |
| 1     | RHGKLRPFE  | 444   | 452  | 9              | HLA-A*02:01 | 444           | 93             | 6522738.984               | 9.30E+01                 | 6.52E+06                | 93          | TRUE         | TRUE              |
| 1     | VRDLPSGFN  | 206   | 214  | 9              | HLA-A*02:01 | 206           | 93             | 6628724.966               | 9.30E+01                 | 6.63E+06                | 93          | TRUE         | TRUE              |
| 1     | SGNFKHLRE  | 176   | 184  | 9              | HLA-A*02:01 | 176           | 93             | 7234857.808               | 9.30E+01                 | 7.23E+06                | 93          | TRUE         | TRUE              |
| 1     | DYNNKLPPD  | 407   | 415  | 9              | HLA-A*02:01 | 407           | 93             | 7369363.857               | 9.30E+01                 | 7.37E+06                | 93          | TRUE         | TRUE              |
| 1     | EDDSEPLVK  | 1240  | 1248 | 9              | HLA-A*02:01 | 1240          | 94             | 7454697.068               | 9.40E+01                 | 7.45E+06                | 94          | TRUE         | TRUE              |
| 1     | TSTALGKLQ  | 923   | 931  | 9              | HLA-A*02:01 | 923           | 94             | 7523674.531               | 9.40E+01                 | 7.52E+06                | 94          | TRUE         | TRUE              |
| 1     | SCCKFDEDD  | 1234  | 1242 | 9              | HLA-A*02:01 | 1234          | 94             | 7824020.866               | 9.40E+01                 | 7.82E+06                | 94          | TRUE         | TRUE              |
| 1     | DKGIYQTSN  | 296   | 304  | 9              | HLA-A*02:01 | 296           | 94             | 8024722.072               | 9.40E+01                 | 8.02E+06                | 94          | TRUE         | TRUE              |
| 1     | TNNVIRACN  | 121   | 129  | 9              | HLA-A*02:01 | 121           | 94             | 8061762.506               | 9.40E+01                 | 8.06E+06                | 94          | TRUE         | TRUE              |
| 1     | PDVDLGDIS  | 1144  | 1152 | 9              | HLA-A*02:01 | 1144          | 94             | 8306728.193               | 9.40E+01                 | 8.31E+06                | 94          | TRUE         | TRUE              |
| 1     | PELDSFKEE  | 1125  | 1133 | 9              | HLA-A*02:01 | 1125          | 94             | 8618466.542               | 9.40E+01                 | 8.62E+06                | 94          | TRUE         | TRUE              |
| 1     | DNAFNCTFE  | 154   | 162  | 9              | HLA-A*02:01 | 154           | 94             | 8678206.899               | 9.40E+01                 | 8.68E+06                | 94          | TRUE         | TRUE              |
| 1     | NESULDLQE  | 1176  | 1184 | 9              | HLA-A*02:01 | 1176          | 94             | 8819216.42                | 9.40E+01                 | 8.82E+06                | 94          | TRUE         | TRUE              |
| 1     | IFKLPLGIN  | 219   | 227  | 9              | HLA-A*02:01 | 219           | 94             | 8900819.622               | 9.40E+01                 | 8.90E+06                | 94          | TRUE         | TRUE              |
| 1     | DNPPFAVSK  | 134   | 142  | 9              | HLA-A*02:01 | 134           | 95             | 9537400.057               | 9.50E+01                 | 9.54E+06                | 95          | TRUE         | TRUE              |
| 1     | DSVRDPKTS  | 560   | 568  | 9              | HLA-A*02:01 | 560           | 96             | 11000945.17               | 9.60E+01                 | 1.10E+07                | 96          | TRUE         | TRUE              |
| 1     | DRLNEVAKN  | 1166  | 1174 | 9              | HLA-A*02:01 | 1166          | 96             | 11128330.11               | 9.60E+01                 | 1.11E+07                | 96          | TRUE         | TRUE              |
| 1     | DSFKEELD   | 1128  | 1136 | 9              | HLA-A*02:01 | 1128          | 96             | 11283140.6                | 9.60E+01                 | 1.13E+07                | 96          | TRUE         | TRUE              |
| 1     | IDRLNEVAK  | 1165  | 1173 | 9              | HLA-A*02:01 | 1165          | 96             | 11492909.85               | 9.60E+01                 | 1.15E+07                | 96          | TRUE         | TRUE              |
| 1     | PKLSTDLIK  | 513   | 521  | 9              | HLA-A*02:01 | 513           | 96             | 11706578.99               | 9.60E+01                 | 1.17E+07                | 96          | TRUE         | TRUE              |
| 1     | QPELDSFKE  | 1124  | 1132 | 9              | HLA-A*02:01 | 1124          | 96             | 11787725.12               | 9.60E+01                 | 1.18E+07                | 96          | TRUE         | TRUE              |
| 1     | TPGTNASSE  | 585   | 593  | 9              | HLA-A*02:01 | 585           | 96             | 12258293.06               | 9.60E+01                 | 1.23E+07                | 96          | TRUE         | TRUE              |
| 1     | DSSIAYSNN  | 684   | 692  | 9              | HLA-A*02:01 | 684           | 96             | 12601725.06               | 9.60E+01                 | 1.26E+07                | 96          | TRUE         | TRUE              |
| 1     | NG         |       |      |                |             |               |                |                           |                          |                         |             |              |                   |

| seq # | peptide    | start | end  | peptide length | allele      | peptide index | median binding | smmpmbec IC <sub>50</sub> | smmpmbec p <sub>el</sub> | legacy IC <sub>50</sub> | legacy rank | scores equal | percentiles equal |
|-------|------------|-------|------|----------------|-------------|---------------|----------------|---------------------------|--------------------------|-------------------------|-------------|--------------|-------------------|
| 1     | NDILSRLLDK | 960   | 968  | 9              | HLA-A*02:01 | 960           | 97             | 16921154.86               | 97                       | 16921154.86             | 97          | TRUE         | TRUE              |
| 1     | DNTFVSGNC  | 1100  | 1108 | 9              | HLA-A*02:01 | 1100          | 97             | 17677872.61               | 97                       | 17677872.61             | 97          | TRUE         | TRUE              |
| 1     | LRFEVFKNK  | 182   | 190  | 9              | HLA-A*02:01 | 182           | 98             | 19428085.23               | 98                       | 19428085.23             | 98          | TRUE         | TRUE              |
| 1     | NYKYRYLRH  | 437   | 445  | 9              | HLA-A*02:01 | 437           | 98             | 19562754.28               | 98                       | 19562754.28             | 98          | TRUE         | TRUE              |
| 1     | SEPVLKGVK  | 1243  | 1251 | 9              | HLA-A*02:01 | 1243          | 98             | 19607851.09               | 98                       | 19607851.09             | 98          | TRUE         | TRUE              |
| 1     | LNEVAKNLN  | 1168  | 1176 | 9              | HLA-A*02:01 | 1168          | 98             | 20437604.94               | 98                       | 20437604.94             | 98          | TRUE         | TRUE              |
| 1     | DPLQPELDS  | 1121  | 1129 | 9              | HLA-A*02:01 | 1121          | 98             | 22931369.91               | 98                       | 22931369.91             | 98          | TRUE         | TRUE              |
| 1     | ENQKQIANQ  | 900   | 908  | 9              | HLA-A*02:01 | 900           | 98             | 23143551.26               | 98                       | 23143551.26             | 98          | TRUE         | TRUE              |
| 1     | ECVLGQSKR  | 1013  | 1021 | 9              | HLA-A*02:01 | 1013          | 98             | 24178535.9                | 98                       | 24178535.9              | 98          | TRUE         | TRUE              |
| 1     | DCSQNPLAE  | 277   | 285  | 9              | HLA-A*02:01 | 277           | 98             | 24178535.9                | 98                       | 24178535.9              | 98          | TRUE         | TRUE              |
| 1     | DPLKPTKRS  | 790   | 798  | 9              | HLA-A*02:01 | 790           | 99             | 25967491.61               | 99                       | 25967491.61             | 99          | TRUE         | TRUE              |
| 1     | CKKFDEDDG  | 1235  | 1243 | 9              | HLA-A*02:01 | 1235          | 99             | 28211748.27               | 99                       | 28211748.27             | 99          | TRUE         | TRUE              |
| 1     | EFVFKNKDG  | 184   | 192  | 9              | HLA-A*02:01 | 184           | 99             | 28670152.3                | 99                       | 28670152.3              | 99          | TRUE         | TRUE              |
| 1     | QDRNTRVF   | 756   | 764  | 9              | HLA-A*02:01 | 756           | 99             | 31147988.09               | 99                       | 31147988.09             | 99          | TRUE         | TRUE              |
| 1     | TREVFQVVK  | 760   | 768  | 9              | HLA-A*02:01 | 760           | 99             | 31219791.6                | 99                       | 31219791.6              | 99          | TRUE         | TRUE              |
| 1     | NPVIPKDG   | 78    | 86   | 9              | HLA-A*02:01 | 78            | 99             | 34231820.8                | 99                       | 34231820.8              | 99          | TRUE         | TRUE              |
| 1     | DSFVVKGDD  | 385   | 393  | 9              | HLA-A*02:01 | 385           | 99             | 36093583.29               | 99                       | 36093583.29             | 99          | TRUE         | TRUE              |
| 1     | PDPLKPTKR  | 789   | 797  | 9              | HLA-A*02:01 | 789           | 100            | 43194654.05               | 100                      | 43194654.05             | 100         | TRUE         | TRUE              |
| 1     | LDKVEAEVQ  | 966   | 974  | 9              | HLA-A*02:01 | 966           | 100            | 43294228.01               | 100                      | 43294228.01             | 100         | TRUE         | TRUE              |
| 1     | PDEIFRSDT  | 43    | 51   | 9              | HLA-A*02:01 | 43            | 100            | 60454690.2                | 100                      | 60454690.2              | 100         | TRUE         | TRUE              |
| 1     | DPKTSEILD  | 564   | 572  | 9              | HLA-A*02:01 | 564           | 100            | 70215016.14               | 100                      | 70215016.14             | 100         | TRUE         | TRUE              |
| 1     | QKEIDRLNE  | 1162  | 1170 | 9              | HLA-A*02:01 | 1162          | 100            | 87786958                  | 100                      | 87786958                | 100         | TRUE         | TRUE              |
| 1     | DRUTGRLQ   | 976   | 984  | 9              | HLA-A*02:01 | 976           | 100            | 100561096.5               | 100                      | 100561096.5             | 100         | TRUE         | TRUE              |

| seq # | peptide    | start | end  | peptide length | allele      | peptide index | median binding | smm IC50    | smm percentil | legacy IC50 | legacy rank | scores equal | percentiles equal |
|-------|------------|-------|------|----------------|-------------|---------------|----------------|-------------|---------------|-------------|-------------|--------------|-------------------|
| 1     | FIAGLAIIV  | 1202  | 1210 | 9              | HLA-A*02:01 | 1202          | 0.4            | 20.18877649 | 0.4           | 20.18877649 | 0.4         | TRUE         | TRUE              |
| 1     | RLQSLQTYV  | 982   | 990  | 9              | HLA-A*02:01 | 982           | 0.7            | 36.73753391 | 0.7           | 36.73753391 | 0.7         | TRUE         | TRUE              |
| 1     | FIFLFLTL   | 2     | 10   | 9              | HLA-A*02:01 | 2             | 0.7            | 41.03080144 | 0.7           | 41.03080144 | 0.7         | TRUE         | TRUE              |
| 1     | VIADVNYKL  | 404   | 412  | 9              | HLA-A*02:01 | 404           | 0.9            | 51.6547186  | 0.9           | 51.6547186  | 0.9         | TRUE         | TRUE              |
| 1     | RLDKVEAEV  | 965   | 973  | 9              | HLA-A*02:01 | 965           | 0.9            | 53.2243051  | 0.9           | 53.2243051  | 0.9         | TRUE         | TRUE              |
| 1     | YLKPTTFML  | 256   | 264  | 9              | HLA-A*02:01 | 256           | 1              | 54.33879457 | 1             | 54.33879457 | 1           | TRUE         | TRUE              |
| 1     | VLNDLSRL   | 958   | 966  | 9              | HLA-A*02:01 | 958           | 1.1            | 58.35929005 | 1.1           | 58.35929005 | 1.1         | TRUE         | TRUE              |
| 1     | LLFNKVTLA  | 803   | 811  | 9              | HLA-A*02:01 | 803           | 1.2            | 63.69568317 | 1.2           | 63.69568317 | 1.2         | TRUE         | TRUE              |
| 1     | VVFLVHTYV  | 1042  | 1050 | 9              | HLA-A*02:01 | 1042          | 1.2            | 64.87987433 | 1.2           | 64.87987433 | 1.2         | TRUE         | TRUE              |
| 1     | MIAAYTAAL  | 851   | 859  | 9              | HLA-A*02:01 | 851           | 1.2            | 65.32960014 | 1.2           | 65.32960014 | 1.2         | TRUE         | TRUE              |
| 1     | LLTDDMIAA  | 846   | 854  | 9              | HLA-A*02:01 | 846           | 1.4            | 78.00276543 | 1.4           | 78.00276543 | 1.4         | TRUE         | TRUE              |
| 1     | HLMSFPQAA  | 1030  | 1038 | 9              | HLA-A*02:01 | 1030          | 1.6            | 101.6506125 | 1.6           | 101.6506125 | 1.6         | TRUE         | TRUE              |
| 1     | FSISITTEV  | 700   | 708  | 9              | HLA-A*02:01 | 700           | 1.8            | 111.9721455 | 1.8           | 111.9721455 | 1.8         | TRUE         | TRUE              |
| 1     | NVYADSFVV  | 381   | 389  | 9              | HLA-A*02:01 | 381           | 2.3            | 151.7434661 | 2.3           | 151.7434661 | 2.3         | TRUE         | TRUE              |
| 1     | QKMVKPTPL  | 768   | 776  | 9              | HLA-A*02:01 | 768           | 2.3            | 154.5645878 | 2.3           | 154.5645878 | 2.3         | TRUE         | TRUE              |
| 1     | FLFLTLTS   | 4     | 12   | 9              | HLA-A*02:01 | 4             | 2.3            | 158.8949154 | 2.3           | 158.8949154 | 2.3         | TRUE         | TRUE              |
| 1     | SIVAYTMSL  | 673   | 681  | 9              | HLA-A*02:01 | 673           | 2.3            | 164.1005362 | 2.3           | 164.1005362 | 2.3         | TRUE         | TRUE              |
| 1     | VLVNSTFFS  | 354   | 362  | 9              | HLA-A*02:01 | 354           | 2.6            | 182.0161819 | 2.6           | 182.0161819 | 2.6         | TRUE         | TRUE              |
| 1     | QYIKWPWVY  | 1190  | 1198 | 9              | HLA-A*02:01 | 1190          | 2.7            | 191.0337056 | 2.7           | 191.0337056 | 2.7         | TRUE         | TRUE              |
| 1     | ALVSGTATA  | 858   | 866  | 9              | HLA-A*02:01 | 858           | 2.8            | 204.225515  | 2.8           | 204.225515  | 2.8         | TRUE         | TRUE              |
| 1     | GLTVLPPLL  | 839   | 847  | 9              | HLA-A*02:01 | 839           | 2.8            | 207.5439127 | 2.8           | 207.5439127 | 2.8         | TRUE         | TRUE              |
| 1     | NINLSLIDL  | 1174  | 1182 | 9              | HLA-A*02:01 | 1174          | 2.8            | 208.9825384 | 2.8           | 208.9825384 | 2.8         | TRUE         | TRUE              |
| 1     | VYVGYQPI   | 195   | 203  | 9              | HLA-A*02:01 | 195           | 2.9            | 215.332707  | 2.9           | 215.332707  | 2.9         | TRUE         | TRUE              |
| 1     | SITTEVMVP  | 703   | 711  | 9              | HLA-A*02:01 | 703           | 2.9            | 217.8261422 | 2.9           | 217.8261422 | 2.9         | TRUE         | TRUE              |
| 1     | FVSGNCDVV  | 1103  | 1111 | 9              | HLA-A*02:01 | 1103          | 3              | 230.202481  | 3             | 230.202481  | 3           | TRUE         | TRUE              |
| 1     | KQLSSNFGA  | 946   | 954  | 9              | HLA-A*02:01 | 946           | 3.2            | 242.1642333 | 3.2           | 242.1642333 | 3.2         | TRUE         | TRUE              |
| 1     | YLTQDLFLP  | 53    | 61   | 9              | HLA-A*02:01 | 53            | 3.2            | 242.7224795 | 3.2           | 242.7224795 | 3.2         | TRUE         | TRUE              |
| 1     | ATAGWTFGA  | 864   | 872  | 9              | HLA-A*02:01 | 864           | 3.3            | 258.291432  | 3.3           | 258.291432  | 3.3         | TRUE         | TRUE              |
| 1     | GLAIVMVT   | 1205  | 1213 | 9              | HLA-A*02:01 | 1205          | 3.3            | 260.681373  | 3.3           | 260.681373  | 3.3         | TRUE         | TRUE              |
| 1     | FLPFYSNVT  | 59    | 67   | 9              | HLA-A*02:01 | 59            | 3.3            | 261.8846237 | 3.3           | 261.8846237 | 3.3         | TRUE         | TRUE              |
| 1     | ILLCCMTSC  | 1214  | 1222 | 9              | HLA-A*02:01 | 1214          | 3.3            | 264.3078123 | 3.3           | 264.3078123 | 3.3         | TRUE         | TRUE              |
| 1     | IIINNSTNV  | 115   | 123  | 9              | HLA-A*02:01 | 115           | 3.4            | 267.9847002 | 3.4           | 267.9847002 | 3.4         | TRUE         | TRUE              |
| 1     | IITDNTFV   | 1096  | 1104 | 9              | HLA-A*02:01 | 1096          | 3.4            | 267.9847002 | 3.4           | 267.9847002 | 3.4         | TRUE         | TRUE              |
| 1     | GTSAAAYFV  | 246   | 254  | 9              | HLA-A*02:01 | 246           | 3.4            | 269.8422814 | 3.4           | 269.8422814 | 3.4         | TRUE         | TRUE              |
| 1     | ALGKLQDVV  | 926   | 934  | 9              | HLA-A*02:01 | 926           | 3.6            | 291.1454451 | 3.6           | 291.1454451 | 3.6         | TRUE         | TRUE              |
| 1     | AIVMVTILL  | 1208  | 1216 | 9              | HLA-A*02:01 | 1208          | 3.6            | 291.8166046 | 3.6           | 291.8166046 | 3.6         | TRUE         | TRUE              |
| 1     | ELLNAPATV  | 502   | 510  | 9              | HLA-A*02:01 | 502           | 3.6            | 293.8393807 | 3.6           | 293.8393807 | 3.6         | TRUE         | TRUE              |
| 1     | ELCDNPFFA  | 131   | 139  | 9              | HLA-A*02:01 | 131           | 3.7            | 306.2739079 | 3.7           | 306.2739079 | 3.7         | TRUE         | TRUE              |
| 1     | TMNNKQSV   | 106   | 114  | 9              | HLA-A*02:01 | 106           | 3.7            | 306.2739079 | 3.7           | 306.2739079 | 3.7         | TRUE         | TRUE              |
| 1     | VLSFELLNA  | 498   | 506  | 9              | HLA-A*02:01 | 498           | 3.7            | 314.854569  | 3.7           | 314.854569  | 3.7         | TRUE         | TRUE              |
| 1     | YQDVNCTDV  | 598   | 606  | 9              | HLA-A*02:01 | 598           | 3.8            | 322.1884741 | 3.8           | 322.1884741 | 3.8         | TRUE         | TRUE              |
| 1     | CMTSCCSCL  | 1218  | 1226 | 9              | HLA-A*02:01 | 1218          | 4              | 350.8407252 | 4             | 350.8407252 | 4           | TRUE         | TRUE              |
| 1     | RVVVLSEFL  | 495   | 503  | 9              | HLA-A*02:01 | 495           | 4              | 364.0072218 | 4             | 364.0072218 | 4           | TRUE         | TRUE              |
| 1     | SLTTTSTAL  | 919   | 927  | 9              | HLA-A*02:01 | 919           | 4              | 364.8463451 | 4             | 364.8463451 | 4           | TRUE         | TRUE              |
| 1     | PLAEKCSV   | 282   | 290  | 9              | HLA-A*02:01 | 282           | 4.1            | 370.7746213 | 4.1           | 370.7746213 | 4.1         | TRUE         | TRUE              |
| 1     | VLAWNTRNI  | 420   | 428  | 9              | HLA-A*02:01 | 420           | 4.1            | 380.2857045 | 4.1           | 380.2857045 | 4.1         | TRUE         | TRUE              |
| 1     | VIRACNFEL  | 124   | 132  | 9              | HLA-A*02:01 | 124           | 4.1            | 385.5760057 | 4.1           | 385.5760057 | 4.1         | TRUE         | TRUE              |
| 1     | LLQYGSFCT  | 735   | 743  | 9              | HLA-A*02:01 | 735           | 4.1            | 391.8411118 | 4.1           | 391.8411118 | 4.1         | TRUE         | TRUE              |
| 1     | VLVENQKQI  | 897   | 905  | 9              | HLA-A*02:01 | 897           | 4.2            | 399.1259819 | 4.2           | 399.1259819 | 4.2         | TRUE         | TRUE              |
| 1     | FSTFKCYGV  | 361   | 369  | 9              | HLA-A*02:01 | 361           | 4.2            | 407.4834739 | 4.2           | 407.4834739 | 4.2         | TRUE         | TRUE              |
| 1     | LIAIVMVTI  | 1206  | 1214 | 9              | HLA-A*02:01 | 1206          | 4.3            | 419.8653158 | 4.3           | 419.8653158 | 4.3         | TRUE         | TRUE              |
| 1     | FMKQYGECL  | 815   | 823  | 9              | HLA-A*02:01 | 815           | 4.3            | 422.7756832 | 4.3           | 422.7756832 | 4.3         | TRUE         | TRUE              |
| 1     | KLPDDFMGC  | 411   | 419  | 9              | HLA-A*02:01 | 411           | 4.4            | 439.6529586 | 4.4           | 439.6529586 | 4.4         | TRUE         | TRUE              |
| 1     | KLNDLCFSN  | 373   | 381  | 9              | HLA-A*02:01 | 373           | 4.5            | 450.9309038 | 4.5           | 450.9309038 | 4.5         | TRUE         | TRUE              |
| 1     | AILTAFSPA  | 233   | 241  | 9              | HLA-A*02:01 | 233           | 4.6            | 457.2039776 | 4.6           | 457.2039776 | 4.6         | TRUE         | TRUE              |
| 1     | GIGYQPYRV  | 488   | 496  | 9              | HLA-A*02:01 | 488           | 4.6            | 472.1826226 | 4.6           | 472.1826226 | 4.6         | TRUE         | TRUE              |
| 1     | MIFDNAFNC  | 151   | 159  | 9              | HLA-A*02:01 | 151           | 4.6            | 473.271116  | 4.6           | 473.271116  | 4.6         | TRUE         | TRUE              |
| 1     | FMGCVLAWN  | 416   | 424  | 9              | HLA-A*02:01 | 416           | 4.6            | 476.5516746 | 4.6           | 476.5516746 | 4.6         | TRUE         | TRUE              |
| 1     | YQPYRVVVL  | 491   | 499  | 9              | HLA-A*02:01 | 491           | 4.8            | 502.4698412 | 4.8           | 502.4698412 | 4.8         | TRUE         | TRUE              |
| 1     | QIAPGQTVG  | 396   | 404  | 9              | HLA-A*02:01 | 396           | 4.9            | 507.1191374 | 4.9           | 507.1191374 | 4.9         | TRUE         | TRUE              |
| 1     | YQTSNFRVV  | 300   | 308  | 9              | HLA-A*02:01 | 300           | 4.9            | 518.9314595 | 4.9           | 518.9314595 | 4.9         | TRUE         | TRUE              |
| 1     | TOAGCLIGA  | 631   | 639  | 9              | HLA-A*02:01 | 631           | 4.9            | 524.9404026 | 4.9           | 524.9404026 | 4.9         | TRUE         | TRUE              |
| 1     | QMAVYRNGI  | 883   | 891  | 9              | HLA-A*02:01 | 883           | 4.9            | 526.1505152 | 4.9           | 526.1505152 | 4.9         | TRUE         | TRUE              |
| 1     | GICASYHTV  | 655   | 663  | 9              | HLA-A*02:01 | 655           | 4.9            | 528.5791156 | 4.9           | 528.5791156 | 4.9         | TRUE         | TRUE              |
| 1     | VWLGFIAGL  | 1198  | 1206 | 9              | HLA-A*02:01 | 1198          | 4.9            | 529.7976163 | 4.9           | 529.7976163 | 4.9         | TRUE         | TRUE              |
| 1     | RLNEVAKNL  | 1167  | 1175 | 9              | HLA-A*02:01 | 1167          | 5.1            | 562.4837755 | 5.1           | 562.4837755 | 5.1         | TRUE         | TRUE              |
| 1     | PLNDYGFYT  | 477   | 485  | 9              | HLA-A*02:01 | 477           | 5.3            | 599.9430132 | 5.3           | 599.9430132 | 5.3         | TRUE         | TRUE              |
| 1     | ALNTLVKQL  | 940   | 948  | 9              | HLA-A*02:01 | 940           | 5.3            | 601.3260247 | 5.3           | 601.3260247 | 5.3         | TRUE         | TRUE              |
| 1     | IAIPTNFSI  | 694   | 702  | 9              | HLA-A*02:01 | 694           | 5.3            | 604.101619  | 5.3           | 604.101619  | 5.3         | TRUE         | TRUE              |
| 1     | WLGFIAAGL  | 1199  | 1207 | 9              | HLA-A*02:01 | 1199          | 5.3            | 605.4942175 | 5.3           | 605.4942175 | 5.3         | TRUE         | TRUE              |
| 1     | VLVYQDVNCT | 596   | 604  | 9              | HLA-A*02:01 | 596           | 6              | 698.4092778 | 6             | 698.4092778 | 6           | TRUE         | TRUE              |
| 1     | FMLKYDENG  | 262   | 270  | 9              | HLA-A*02:01 | 262           | 6.1            | 711.3936757 | 6.1           | 711.3936757 | 6.1         | TRUE         | TRUE              |
| 1     | LLLQYSFSC  | 734   | 742  | 9              | HLA-A*02:01 | 734           | 6.1            | 719.6312263 | 6.1           | 719.6312263 | 6.1         | TRUE         | TRUE              |
| 1     | IINNSTNVV  | 116   | 124  | 9              | HLA-A*02:01 | 116           | 6.1            | 724.6194716 | 6.1           | 724.6194716 | 6.1         | TRUE         | TRUE              |
| 1     | IKWPVYVWL  | 1192  | 1200 | 9              | HLA-A*02:01 | 1192          | 6.1            | 726.289892  | 6.1           | 726.289892  | 6.1         | TRUE         | TRUE              |
| 1     | FNATKFPSV  | 329   | 337  | 9              | HLA-A*02:01 | 329           | 6.5            | 783.6280984 | 6.5           | 783.6280984 | 6.5         | TRUE         | TRUE              |
| 1     | SLGADSSIA  | 680   | 688  | 9              | HLA-A*02:01 | 680           | 6.6            | 831.974471  | 6.6           | 831.974471  | 6.6         | TRUE         | TRUE              |
| 1     | QLNRALSIG  | 744   | 752  | 9              | HLA-A*02:01 | 744           | 6.7            | 837.7414421 | 6.7           | 837.7414421 | 6.7         | TRUE         | TRUE              |
| 1     | VYVQQLURA  | 989   | 997  | 9              | HLA-A*02:01 | 989           | 6.7            | 837.7414421 | 6.7           | 837.7414421 | 6.7         | TRUE         | TRUE              |
| 1     | MFIFLLFLT  | 1     | 9    | 9              | HLA-A*02:01 | 1             | 6.8            | 865.1870294 | 6.8           | 865.1870294 | 6.8         | TRUE         | TRUE              |
| 1     | VIGIINNVT  | 1111  | 1119 | 9              | HLA-A*02:01 | 1111          | 6.9            | 877.2229799 | 6.9           | 877.2229799 | 6.9         | TRUE         | TRUE              |
| 1     | VYVWLGFIAG | 1197  | 1205 | 9              | HLA-A*02:01 | 1197          | 6.9            | 887.3807432 | 6.9           | 887.3807432 | 6.9         | TRUE         | TRUE              |
| 1     | RIYSTGNVNV | 620   | 628  | 9              | HLA-A*02:01 | 620           | 6.9            | 891.4767066 | 6.9           | 891.4767066 | 6.9         | TRUE         | TRUE              |
| 1     | VMVMTILLCC | 1210  | 1218 | 9              | HLA-A*02:01 | 1210          | 6.9            | 901.7995204 | 6.9           | 901.7995204 | 6.9         | TRUE         | TRUE              |
| 1     | IAAYTAALV  | 852   | 860  | 9              | HLA-A*02:01 | 852           | 7              | 914.3448014 | 7             | 914.3448014 | 7           | TRUE         | TRUE              |
| 1     | CTFEYISDA  | 159   | 167  | 9              | HLA-A*02:01 | 159           | 7.1            | 924.932415  | 7.1           | 924.932415  | 7.1         | TRUE         | TRUE              |
| 1     | FLFPFYSNV  | 58    | 66   | 9              | HLA-A*02:01 | 58            | 7.1            | 929.2017092 | 7.1           | 929.2017092 | 7.1         | TRUE         | TRUE              |
| 1     | FLVHTYVPS  | 1044  | 1052 | 9              | HLA-A*02:01 | 1044          | 7.3            | 979.7381063 | 7.3           | 979.7381063 | 7.3         | TRUE         | TRUE              |
| 1     | QLSSNFGAI  | 947   | 955  | 9              | HLA-A*02:01 | 947           | 7.4            | 1007.186741 | 7.4           | 1007.186741 | 7.4         | TRUE         | TRUE              |
| 1     | FKDGIYFAA  | 83    | 91   | 9              | HLA-A*02:01 | 83            | 7.4            | 1023.552209 | 7.4           | 1023.552209 | 7.4         | TRUE         | TRUE              |
| 1     | AVDCSONPL  | 275   | 283  | 9              | HLA-A*02:01 | 275           | 7.6            | 1086.700833 | 7.6           | 1086.700833 | 7.6         | TRUE         | TRUE              |
| 1     | LQIPFAMQM  | 876   | 884  | 9              | HLA-A*02:01 | 876           | 7.7            | 1091.716816 | 7.7           | 1091.716816 | 7.7</       |              |                   |

| seq # | peptide    | start | end  | peptide length | allele      | peptide index | median binding | smm IC50    | smm percentil | legacy IC50 | legacy rank | scores equal | percentiles equal |
|-------|------------|-------|------|----------------|-------------|---------------|----------------|-------------|---------------|-------------|-------------|--------------|-------------------|
| 1     | YTAALVSGT  | 855   | 863  | 9              | HLA-A*02:01 | 855           | 8.8            | 1403.16906  | 8.8           | 1403.16906  | 8.8         | TRUE         | TRUE              |
| 1     | VFNGTSWFI  | 1078  | 1086 | 9              | HLA-A*02:01 | 1078          | 8.8            | 1412.895364 | 8.8           | 1412.895364 | 8.8         | TRUE         | TRUE              |
| 1     | FPQAAPHGV  | 1034  | 1042 | 9              | HLA-A*02:01 | 1034          | 8.8            | 1422.689086 | 8.8           | 1422.689086 | 8.8         | TRUE         | TRUE              |
| 1     | FOTQAGCL   | 629   | 637  | 9              | HLA-A*02:01 | 629           | 8.9            | 1449.138851 | 8.9           | 1449.138851 | 8.9         | TRUE         | TRUE              |
| 1     | DVSDFTDSV  | 554   | 562  | 9              | HLA-A*02:01 | 554           | 9              | 1469.298381 | 9             | 1469.298381 | 9           | TRUE         | TRUE              |
| 1     | ILPDPKPT   | 787   | 795  | 9              | HLA-A*02:01 | 787           | 9.1            | 1496.614677 | 9.1           | 1496.614677 | 9.1         | TRUE         | TRUE              |
| 1     | TSVDNMYI   | 716   | 724  | 9              | HLA-A*02:01 | 716           | 9.2            | 1503.522737 | 9.2           | 1503.522737 | 9.2         | TRUE         | TRUE              |
| 1     | LITGRQLSL  | 978   | 986  | 9              | HLA-A*02:01 | 978           | 9.2            | 1517.434661 | 9.2           | 1517.434661 | 9.2         | TRUE         | TRUE              |
| 1     | IAISSVLNDI | 954   | 962  | 9              | HLA-A*02:01 | 954           | 9.3            | 1545.645878 | 9.3           | 1545.645878 | 9.3         | TRUE         | TRUE              |
| 1     | SIAYSNNIT  | 686   | 694  | 9              | HLA-A*02:01 | 686           | 9.3            | 1567.147954 | 9.3           | 1567.147954 | 9.3         | TRUE         | TRUE              |
| 1     | NTLKPIFKL  | 214   | 222  | 9              | HLA-A*02:01 | 214           | 9.5            | 1585.294672 | 9.5           | 1585.294672 | 9.5         | TRUE         | TRUE              |
| 1     | ALNVCWPLN  | 471   | 479  | 9              | HLA-A*02:01 | 471           | 9.5            | 1596.28341  | 9.5           | 1596.28341  | 9.5         | TRUE         | TRUE              |
| 1     | DMIAAYTAA  | 850   | 858  | 9              | HLA-A*02:01 | 850           | 9.7            | 1652.380267 | 9.7           | 1652.380267 | 9.7         | TRUE         | TRUE              |
| 1     | KLPLGINIT  | 221   | 229  | 9              | HLA-A*02:01 | 221           | 9.7            | 1663.83402  | 9.7           | 1663.83402  | 9.7         | TRUE         | TRUE              |
| 1     | DISGINASV  | 1150  | 1158 | 9              | HLA-A*02:01 | 1150          | 9.7            | 1663.83402  | 9.7           | 1663.83402  | 9.7         | TRUE         | TRUE              |
| 1     | IYQTSNFRV  | 299   | 307  | 9              | HLA-A*02:01 | 299           | 9.7            | 1671.513929 | 9.7           | 1671.513929 | 9.7         | TRUE         | TRUE              |
| 1     | AISQIQEQL  | 912   | 920  | 9              | HLA-A*02:01 | 912           | 9.8            | 1690.869148 | 9.8           | 1690.869148 | 9.8         | TRUE         | TRUE              |
| 1     | AALQIPFAM  | 874   | 882  | 9              | HLA-A*02:01 | 874           | 9.9            | 1730.25455  | 9.9           | 1730.25455  | 9.9         | TRUE         | TRUE              |
| 1     | LCDNPFPAV  | 132   | 140  | 9              | HLA-A*02:01 | 132           | 9.9            | 1730.25455  | 9.9           | 1730.25455  | 9.9         | TRUE         | TRUE              |
| 1     | FAATEKSNV  | 89    | 97   | 9              | HLA-A*02:01 | 89            | 10             | 1738.241042 | 10            | 1738.241042 | 10          | TRUE         | TRUE              |
| 1     | AAHPGVVFL  | 1037  | 1045 | 9              | HLA-A*02:01 | 1037          | 10             | 1750.289954 | 10            | 1750.289954 | 10          | TRUE         | TRUE              |
| 1     | WTFGAGAAAL | 868   | 876  | 9              | HLA-A*02:01 | 868           | 10             | 1770.557356 | 10            | 1770.557356 | 10          | TRUE         | TRUE              |
| 1     | FITQRNFFS  | 1085  | 1093 | 9              | HLA-A*02:01 | 1085          | 10             | 1774.638912 | 10            | 1774.638912 | 10          | TRUE         | TRUE              |
| 1     | IVMMTILLC  | 1209  | 1217 | 9              | HLA-A*02:01 | 1209          | 11             | 1786.940122 | 11            | 1786.940122 | 11          | TRUE         | TRUE              |
| 1     | DLPSTGFNTL | 208   | 216  | 9              | HLA-A*02:01 | 208           | 12             | 1824.357725 | 12            | 1824.357725 | 12          | TRUE         | TRUE              |
| 1     | ELDSFKKEEL | 1126  | 1134 | 9              | HLA-A*02:01 | 1126          | 12             | 1849.737069 | 12            | 1849.737069 | 12          | TRUE         | TRUE              |
| 1     | ISDAFSLDV  | 164   | 172  | 9              | HLA-A*02:01 | 164           | 12             | 1884.126249 | 12            | 1884.126249 | 12          | TRUE         | TRUE              |
| 1     | GINITNFRA  | 225   | 233  | 9              | HLA-A*02:01 | 225           | 12             | 1905.943402 | 12            | 1905.943402 | 12          | TRUE         | TRUE              |
| 1     | AQDIWGTSA  | 241   | 249  | 9              | HLA-A*02:01 | 241           | 12             | 1919.154771 | 12            | 1919.154771 | 12          | TRUE         | TRUE              |
| 1     | FAMQAMAYRF | 880   | 888  | 9              | HLA-A*02:01 | 880           | 12             | 1923.57888  | 12            | 1923.57888  | 12          | TRUE         | TRUE              |
| 1     | DLCFSNVYA  | 376   | 384  | 9              | HLA-A*02:01 | 376           | 12             | 1963.857628 | 12            | 1963.857628 | 12          | TRUE         | TRUE              |
| 1     | FDEEDSEPV  | 1238  | 1246 | 9              | HLA-A*02:01 | 1238          | 12             | 1972.922383 | 12            | 1972.922383 | 12          | TRUE         | TRUE              |
| 1     | VVVLSEFLL  | 496   | 504  | 9              | HLA-A*02:01 | 496           | 12             | 2000.368468 | 12            | 2000.368468 | 12          | TRUE         | TRUE              |
| 1     | FSQILPDPL  | 784   | 792  | 9              | HLA-A*02:01 | 784           | 12             | 2046.963035 | 12            | 2046.963035 | 12          | TRUE         | TRUE              |
| 1     | ELGKYEQYI  | 1184  | 1192 | 9              | HLA-A*02:01 | 1184          | 12             | 2065.903351 | 12            | 2065.903351 | 12          | TRUE         | TRUE              |
| 1     | YGFYTTTGI  | 481   | 489  | 9              | HLA-A*02:01 | 481           | 12             | 2075.439127 | 12            | 2075.439127 | 12          | TRUE         | TRUE              |
| 1     | FLVYKGYQ   | 193   | 201  | 9              | HLA-A*02:01 | 193           | 12             | 2114.024421 | 12            | 2114.024421 | 12          | TRUE         | TRUE              |
| 1     | PALNCYWPL  | 470   | 478  | 9              | HLA-A*02:01 | 470           | 12             | 2168.25322  | 12            | 2168.25322  | 12          | TRUE         | TRUE              |
| 1     | ILDISPCSF  | 570   | 578  | 9              | HLA-A*02:01 | 570           | 12             | 2168.25322  | 12            | 2168.25322  | 12          | TRUE         | TRUE              |
| 1     | VYDPLQPEL  | 1119  | 1127 | 9              | HLA-A*02:01 | 1119          | 13             | 2234.138023 | 13            | 2234.138023 | 13          | TRUE         | TRUE              |
| 1     | YFPRGVFV   | 1070  | 1078 | 9              | HLA-A*02:01 | 1070          | 13             | 2270.439846 | 13            | 2270.439846 | 13          | TRUE         | TRUE              |
| 1     | YICGOSTEC  | 723   | 731  | 9              | HLA-A*02:01 | 723           | 13             | 2280.91972  | 13            | 2280.91972  | 13          | TRUE         | TRUE              |
| 1     | DLLFNKVTI  | 802   | 810  | 9              | HLA-A*02:01 | 802           | 13             | 2302.02481  | 13            | 2302.02481  | 13          | TRUE         | TRUE              |
| 1     | GAALQIPFA  | 873   | 881  | 9              | HLA-A*02:01 | 873           | 13             | 2312.650474 | 13            | 2312.650474 | 13          | TRUE         | TRUE              |
| 1     | IAIVMVTIL  | 1207  | 1215 | 9              | HLA-A*02:01 | 1207          | 13             | 2328.681001 | 13            | 2328.681001 | 13          | TRUE         | TRUE              |
| 1     | YECDIPIGA  | 646   | 654  | 9              | HLA-A*02:01 | 646           | 13             | 2449.68363  | 13            | 2449.68363  | 13          | TRUE         | TRUE              |
| 1     | MVTILLCOM  | 1211  | 1219 | 9              | HLA-A*02:01 | 1211          | 13             | 2483.762124 | 13            | 2483.762124 | 13          | TRUE         | TRUE              |
| 1     | FIEDLFNKN  | 799   | 807  | 9              | HLA-A*02:01 | 799           | 13             | 2524.120012 | 13            | 2524.120012 | 13          | TRUE         | TRUE              |
| 1     | AGLIAIVMV  | 1204  | 1212 | 9              | HLA-A*02:01 | 1204          | 13             | 2524.12001  | 13            | 2524.12001  | 13          | TRUE         | TRUE              |
| 1     | NAQALNTLV  | 937   | 945  | 9              | HLA-A*02:01 | 937           | 13             | 2559.234019 | 13            | 2559.234019 | 13          | TRUE         | TRUE              |
| 1     | SNFGAIVSS  | 950   | 958  | 9              | HLA-A*02:01 | 950           | 13             | 2565.133662 | 13            | 2565.133662 | 13          | TRUE         | TRUE              |
| 1     | NGLTVLPLP  | 838   | 846  | 9              | HLA-A*02:01 | 838           | 14             | 2588.868552 | 14            | 2588.868552 | 14          | TRUE         | TRUE              |
| 1     | PLTTDDMIA  | 845   | 853  | 9              | HLA-A*02:01 | 845           | 14             | 2606.813732 | 14            | 2606.813732 | 14          | TRUE         | TRUE              |
| 1     | NTREVFQOV  | 759   | 767  | 9              | HLA-A*02:01 | 759           | 14             | 2643.078123 | 14            | 2643.078123 | 14          | TRUE         | TRUE              |
| 1     | QQLIRAAEI  | 992   | 1000 | 9              | HLA-A*02:01 | 992           | 14             | 2710.878168 | 14            | 2710.878168 | 14          | TRUE         | TRUE              |
| 1     | VMPVSMAKT  | 708   | 716  | 9              | HLA-A*02:01 | 708           | 14             | 2710.878168 | 14            | 2710.878168 | 14          | TRUE         | TRUE              |
| 1     | FKPLGINIG  | 220   | 228  | 9              | HLA-A*02:01 | 220           | 14             | 2723.391013 | 14            | 2723.391013 | 14          | TRUE         | TRUE              |
| 1     | LQTYVTQQL  | 986   | 994  | 9              | HLA-A*02:01 | 986           | 14             | 2825.595563 | 14            | 2825.595563 | 14          | TRUE         | TRUE              |
| 1     | CVLGQSKRV  | 1014  | 1022 | 9              | HLA-A*02:01 | 1014          | 14             | 2898.077532 | 14            | 2898.077532 | 14          | TRUE         | TRUE              |
| 1     | KLQDVVNQN  | 929   | 937  | 9              | HLA-A*02:01 | 929           | 14             | 2931.635689 | 14            | 2931.635689 | 14          | TRUE         | TRUE              |
| 1     | FFSPQIIT   | 1091  | 1099 | 9              | HLA-A*02:01 | 1091          | 14             | 2931.635689 | 14            | 2931.635689 | 14          | TRUE         | TRUE              |
| 1     | LLCCMTSCC  | 1215  | 1223 | 9              | HLA-A*02:01 | 1215          | 14             | 2938.393807 | 14            | 2938.393807 | 14          | TRUE         | TRUE              |
| 1     | KLSTOLIKN  | 514   | 522  | 9              | HLA-A*02:01 | 514           | 14             | 2938.393807 | 14            | 2938.393807 | 14          | TRUE         | TRUE              |
| 1     | DILSRDKV   | 961   | 969  | 9              | HLA-A*02:01 | 961           | 14             | 2951.956816 | 14            | 2951.956816 | 14          | TRUE         | TRUE              |
| 1     | ASYHTVSL   | 658   | 666  | 9              | HLA-A*02:01 | 658           | 14             | 2958.76178  | 14            | 2958.76178  | 14          | TRUE         | TRUE              |
| 1     | VAYTMSLGA  | 675   | 683  | 9              | HLA-A*02:01 | 675           | 14             | 3055.694975 | 14            | 3055.694975 | 14          | TRUE         | TRUE              |
| 1     | LPDFMFGCV  | 412   | 420  | 9              | HLA-A*02:01 | 412           | 14             | 3069.799422 | 14            | 3069.799422 | 14          | TRUE         | TRUE              |
| 1     | DIWGTSAAS  | 243   | 251  | 9              | HLA-A*02:01 | 243           | 14             | 3069.799422 | 14            | 3069.799422 | 14          | TRUE         | TRUE              |
| 1     | YISDAFSLD  | 163   | 171  | 9              | HLA-A*02:01 | 163           | 15             | 3119.67965  | 15            | 3119.67965  | 15          | TRUE         | TRUE              |
| 1     | NNMYIGDST  | 721   | 729  | 9              | HLA-A*02:01 | 721           | 15             | 3126.871254 | 15            | 3126.871254 | 15          | TRUE         | TRUE              |
| 1     | VVIGIINT   | 1110  | 1118 | 9              | HLA-A*02:01 | 1110          | 15             | 3214.474612 | 15            | 3214.474612 | 15          | TRUE         | TRUE              |
| 1     | RVVPSGDVV  | 306   | 314  | 9              | HLA-A*02:01 | 306           | 15             | 3404.944207 | 15            | 3404.944207 | 15          | TRUE         | TRUE              |
| 1     | FRSDTLTYL  | 47    | 55   | 9              | HLA-A*02:01 | 47            | 15             | 3436.449768 | 15            | 3436.449768 | 15          | TRUE         | TRUE              |
| 1     | LYLTQDLFL  | 52    | 60   | 9              | HLA-A*02:01 | 52            | 15             | 3444.371603 | 15            | 3444.371603 | 15          | TRUE         | TRUE              |
| 1     | AATEKSNVV  | 90    | 98   | 9              | HLA-A*02:01 | 90            | 15             | 3573.633412 | 15            | 3573.633412 | 15          | TRUE         | TRUE              |
| 1     | TMIFDNAFN  | 150   | 158  | 9              | HLA-A*02:01 | 150           | 15             | 3598.40466  | 15            | 3598.40466  | 15          | TRUE         | TRUE              |
| 1     | TLADAGFMK  | 809   | 817  | 9              | HLA-A*02:01 | 809           | 15             | 3615.014137 | 15            | 3615.014137 | 15          | TRUE         | TRUE              |
| 1     | PIFKLPLGI  | 218   | 226  | 9              | HLA-A*02:01 | 218           | 15             | 3640.072218 | 15            | 3640.072218 | 15          | TRUE         | TRUE              |
| 1     | FKNHTSPDV  | 1138  | 1146 | 9              | HLA-A*02:01 | 1138          | 16             | 3820.41024  | 16            | 3820.41024  | 16          | TRUE         | TRUE              |
| 1     | TALGKLQDV  | 925   | 933  | 9              | HLA-A*02:01 | 925           | 16             | 3838.044448 | 16            | 3838.044448 | 16          | TRUE         | TRUE              |
| 1     | KNKDGFLYV  | 188   | 196  | 9              | HLA-A*02:01 | 188           | 16             | 3909.399022 | 16            | 3909.399022 | 16          | TRUE         | TRUE              |
| 1     | LQDVVNQNA  | 930   | 938  | 9              | HLA-A*02:01 | 930           | 16             | 3918.411118 | 16            | 3918.411118 | 16          | TRUE         | TRUE              |
| 1     | VOIDRLITG  | 973   | 981  | 9              | HLA-A*02:01 | 973           | 16             | 3963.78418  | 16            | 3963.78418  | 16          | TRUE         | TRUE              |
| 1     | YFVGYLKPT  | 252   | 260  | 9              | HLA-A*02:01 | 252           | 16             | 4018.925911 | 16            | 4018.925911 | 16          | TRUE         | TRUE              |
| 1     | CVNFFNGL   | 524   | 532  | 9              | HLA-A*02:01 | 524           | 16             | 4074.834739 | 16            | 4074.834739 | 16          | TRUE         | TRUE              |
| 1     | HLREFVFKN  | 181   | 189  | 9              | HLA-A*02:01 | 181           | 17             | 4218.033261 | 17            | 4218.033261 | 17          | TRUE         | TRUE              |
| 1     | KLRPFERDI  | 447   | 455  | 9              | HLA-A*02:01 | 447           | 17             | 4247.271271 | 17            | 4247.271271 | 17          | TRUE         | TRUE              |
| 1     | FVGYLKPTT  | 253   | 261  | 9              | HLA-A*02:01 | 253           | 17             | 4376.329367 | 17            | 4376.329367 | 17          | TRUE         | TRUE              |
| 1     | GLTGTGLVT  | 531   | 539  | 9              | HLA-A*02:01 | 531           | 17             | 4396.529586 | 17            | 4396.529586 | 17          | TRUE         | TRUE              |
| 1     | KWPPWVWVLG | 1193  | 1201 | 9              | HLA-A*02:01 | 1193          | 17             | 4416.823044 | 17            | 4416.823044 | 17          | TRUE         | TRUE              |
| 1     | MSLGADESS  | 679   | 687  | 9              | HLA-A*02:01 | 679           | 17             | 4457.691405 | 17            | 4457.691405 | 17          | TRUE         | TRUE              |
| 1     | FGAGAAALQI | 870   | 878  | 9              | HLA-A*02:01 | 870           | 17             | 4467.967444 | 17            | 4467.967444 | 17          | TRUE         | TRUE              |
| 1     | LTQDLFLPI  | 54    | 62   | 9              | HLA-A*02:01 | 54            | 17             | 4509.309038 | 17            | 4509.309038 | 17          | TRUE         | TRUE              |
| 1     | AFNCTFEYI  | 156   | 164  |                |             |               |                |             |               |             |             |              |                   |

| seq # | peptide    | start | end  | peptide length | allele      | peptide index | median binding | smm IC50    | smm percentil | legacy IC50 | legacy rank | scores equal | percentiles equal |
|-------|------------|-------|------|----------------|-------------|---------------|----------------|-------------|---------------|-------------|-------------|--------------|-------------------|
| 1     | FAVSKPMGT  | 138   | 146  | 9              | HLA-A*02:01 | 138           | 18             | 5165.47186  | 18            | 5165.47186  | 18          | TRUE         | TRUE              |
| 1     | SMAKTSVDC  | 712   | 720  | 9              | HLA-A*02:01 | 712           | 18             | 5165.47186  | 18            | 5165.47186  | 18          | TRUE         | TRUE              |
| 1     | SVVNIQKEI  | 1157  | 1165 | 9              | HLA-A*02:01 | 1157          | 18             | 5297.976163 | 18            | 5297.976163 | 18          | TRUE         | TRUE              |
| 1     | CSFGVSVI   | 576   | 584  | 9              | HLA-A*02:01 | 576           | 18             | 5322.43051  | 18            | 5322.43051  | 18          | TRUE         | TRUE              |
| 1     | FQPFQQFGR  | 545   | 553  | 9              | HLA-A*02:01 | 545           | 19             | 5534.902819 | 19            | 5534.902819 | 19          | TRUE         | TRUE              |
| 1     | QIQESLTTT  | 915   | 923  | 9              | HLA-A*02:01 | 915           | 19             | 5611.900987 | 19            | 5611.900987 | 19          | TRUE         | TRUE              |
| 1     | QIANQFNKA  | 904   | 912  | 9              | HLA-A*02:01 | 904           | 19             | 5637.804345 | 19            | 5637.804345 | 19          | TRUE         | TRUE              |
| 1     | TLVLTQDLF  | 51    | 59   | 9              | HLA-A*02:01 | 51            | 19             | 5650.800826 | 19            | 5650.800826 | 19          | TRUE         | TRUE              |
| 1     | SSMRGVVYP  | 35    | 43   | 9              | HLA-A*02:01 | 35            | 19             | 5676.883738 | 19            | 5676.883738 | 19          | TRUE         | TRUE              |
| 1     | IHADQLTPA  | 610   | 618  | 9              | HLA-A*02:01 | 610           | 19             | 5689.970306 | 19            | 5689.970306 | 19          | TRUE         | TRUE              |
| 1     | YKGYQPIDV  | 197   | 205  | 9              | HLA-A*02:01 | 197           | 19             | 5689.970306 | 19            | 5689.970306 | 19          | TRUE         | TRUE              |
| 1     | ILTAFSPAQ  | 234   | 242  | 9              | HLA-A*02:01 | 234           | 19             | 5703.087043 | 19            | 5703.087043 | 19          | TRUE         | TRUE              |
| 1     | IFRSDTLYL  | 46    | 54   | 9              | HLA-A*02:01 | 46            | 19             | 5716.23402  | 19            | 5716.23402  | 19          | TRUE         | TRUE              |
| 1     | VVRGWVFGS  | 97    | 105  | 9              | HLA-A*02:01 | 97            | 19             | 5769.125678 | 19            | 5769.125678 | 19          | TRUE         | TRUE              |
| 1     | AQVKQMYSKT | 765   | 773  | 9              | HLA-A*02:01 | 765           | 19             | 5835.92901  | 19            | 5835.92901  | 19          | TRUE         | TRUE              |
| 1     | STFFSTFKC  | 358   | 366  | 9              | HLA-A*02:01 | 358           | 19             | 5876.381732 | 19            | 5876.381732 | 19          | TRUE         | TRUE              |
| 1     | VTLADAGFM  | 808   | 816  | 9              | HLA-A*02:01 | 808           | 19             | 5971.865254 | 19            | 5971.865254 | 19          | TRUE         | TRUE              |
| 1     | YYPDEIFRS  | 41    | 49   | 9              | HLA-A*02:01 | 41            | 19             | 6054.942175 | 19            | 6054.942175 | 19          | TRUE         | TRUE              |
| 1     | RLITGRLOS  | 977   | 985  | 9              | HLA-A*02:01 | 977           | 19             | 6096.91303  | 19            | 6096.91303  | 19          | TRUE         | TRUE              |
| 1     | SLQTVVTQQ  | 985   | 993  | 9              | HLA-A*02:01 | 985           | 19             | 6167.511955 | 19            | 6167.511955 | 19          | TRUE         | TRUE              |
| 1     | VDLGDISGI  | 1146  | 1154 | 9              | HLA-A*02:01 | 1146          | 19             | 6167.511955 | 19            | 6167.511955 | 19          | TRUE         | TRUE              |
| 1     | VVNQNAQAL  | 933   | 941  | 9              | HLA-A*02:01 | 933           | 19             | 6267.725963 | 19            | 6267.725963 | 19          | TRUE         | TRUE              |
| 1     | KAYFPREGV  | 1068  | 1076 | 9              | HLA-A*02:01 | 1068          | 19             | 6282.174563 | 19            | 6282.174563 | 19          | TRUE         | TRUE              |
| 1     | KCSVKSFEI  | 287   | 295  | 9              | HLA-A*02:01 | 287           | 20             | 6369.568317 | 20            | 6369.568317 | 20          | TRUE         | TRUE              |
| 1     | ALSGLAEQ   | 748   | 756  | 9              | HLA-A*02:01 | 748           | 20             | 6428.505207 | 20            | 6428.505207 | 20          | TRUE         | TRUE              |
| 1     | KSFEIDKGI  | 291   | 299  | 9              | HLA-A*02:01 | 291           | 20             | 6487.987433 | 20            | 6487.987433 | 20          | TRUE         | TRUE              |
| 1     | NIQKEIDRL  | 1160  | 1168 | 9              | HLA-A*02:01 | 1160          | 20             | 6593.408748 | 20            | 6593.408748 | 20          | TRUE         | TRUE              |
| 1     | DQLTPAWRI  | 613   | 621  | 9              | HLA-A*02:01 | 613           | 20             | 6654.416808 | 20            | 6654.416808 | 20          | TRUE         | TRUE              |
| 1     | WVYVWLGFI  | 1196  | 1204 | 9              | HLA-A*02:01 | 1196          | 20             | 6793.756861 | 20            | 6793.756861 | 20          | TRUE         | TRUE              |
| 1     | TILLCLMST  | 1213  | 1221 | 9              | HLA-A*02:01 | 1213          | 20             | 6793.756861 | 20            | 6793.756861 | 20          | TRUE         | TRUE              |
| 1     | SQKISAVYT  | 670   | 678  | 9              | HLA-A*02:01 | 670           | 20             | 6825.115418 | 20            | 6825.115418 | 20          | TRUE         | TRUE              |
| 1     | AAATKMECV  | 1007  | 1015 | 9              | HLA-A*02:01 | 1007          | 20             | 6840.848933 | 20            | 6840.848933 | 20          | TRUE         | TRUE              |
| 1     | ISPCFSGGV  | 573   | 581  | 9              | HLA-A*02:01 | 573           | 20             | 6856.618719 | 20            | 6856.618719 | 20          | TRUE         | TRUE              |
| 1     | STAHADQL   | 607   | 615  | 9              | HLA-A*02:01 | 607           | 20             | 6888.267433 | 20            | 6888.267433 | 20          | TRUE         | TRUE              |
| 1     | LLNAPATVC  | 503   | 511  | 9              | HLA-A*02:01 | 503           | 20             | 6888.267433 | 20            | 6888.267433 | 20          | TRUE         | TRUE              |
| 1     | GYQPRYVVV  | 490   | 498  | 9              | HLA-A*02:01 | 490           | 20             | 6984.092778 | 20            | 6984.092778 | 20          | TRUE         | TRUE              |
| 1     | LNLDLCSNV  | 374   | 382  | 9              | HLA-A*02:01 | 374           | 20             | 7016.329886 | 20            | 7016.329886 | 20          | TRUE         | TRUE              |
| 1     | FNFNGLTGT  | 527   | 535  | 9              | HLA-A*02:01 | 527           | 20             | 7064.964761 | 20            | 7064.964761 | 20          | TRUE         | TRUE              |
| 1     | SVIIHNNST  | 113   | 121  | 9              | HLA-A*02:01 | 113           | 20             | 7064.964761 | 20            | 7064.964761 | 20          | TRUE         | TRUE              |
| 1     | CVADYSVLY  | 348   | 356  | 9              | HLA-A*02:01 | 348           | 20             | 7130.336075 | 20            | 7130.336075 | 20          | TRUE         | TRUE              |
| 1     | SVLYNSTFF  | 353   | 361  | 9              | HLA-A*02:01 | 353           | 20             | 7146.7732   | 20            | 7146.7732   | 20          | TRUE         | TRUE              |
| 1     | STECANLLI  | 728   | 736  | 9              | HLA-A*02:01 | 728           | 21             | 7262.89892  | 21            | 7262.89892  | 21          | TRUE         | TRUE              |
| 1     | AQKFNGLTV  | 834   | 842  | 9              | HLA-A*02:01 | 834           | 21             | 7296.422938 | 21            | 7296.422938 | 21          | TRUE         | TRUE              |
| 1     | AYSNNITAI  | 688   | 696  | 9              | HLA-A*02:01 | 688           | 21             | 7363.935909 | 21            | 7363.935909 | 21          | TRUE         | TRUE              |
| 1     | GVSVITPGT  | 580   | 588  | 9              | HLA-A*02:01 | 580           | 21             | 7397.926292 | 21            | 7397.926292 | 21          | TRUE         | TRUE              |
| 1     | YTMISLGADS | 677   | 685  | 9              | HLA-A*02:01 | 677           | 21             | 7535.464011 | 21            | 7535.464011 | 21          | TRUE         | TRUE              |
| 1     | SVLNDILSR  | 957   | 965  | 9              | HLA-A*02:01 | 957           | 21             | 7675.558746 | 21            | 7675.558746 | 21          | TRUE         | TRUE              |
| 1     | KGYQPIDVV  | 198   | 206  | 9              | HLA-A*02:01 | 198           | 21             | 7728.76318  | 21            | 7728.76318  | 21          | TRUE         | TRUE              |
| 1     | PMGTQTHMT  | 143   | 151  | 9              | HLA-A*02:01 | 143           | 21             | 7764.437528 | 21            | 7764.437528 | 21          | TRUE         | TRUE              |
| 1     | MLKYDENG   | 263   | 271  | 9              | HLA-A*02:01 | 263           | 21             | 7764.437528 | 21            | 7764.437528 | 21          | TRUE         | TRUE              |
| 1     | GNCDVVGII  | 1106  | 1114 | 9              | HLA-A*02:01 | 1106          | 22             | 7963.610307 | 22            | 7963.610307 | 22          | TRUE         | TRUE              |
| 1     | YADSFVVKG  | 383   | 391  | 9              | HLA-A*02:01 | 383           | 22             | 7981.968324 | 22            | 7981.968324 | 22          | TRUE         | TRUE              |
| 1     | CPFGVEFNA  | 323   | 331  | 9              | HLA-A*02:01 | 323           | 22             | 8000.368662 | 22            | 8000.368662 | 22          | TRUE         | TRUE              |
| 1     | CLGDINARD  | 822   | 830  | 9              | HLA-A*02:01 | 822           | 22             | 8111.664876 | 22            | 8111.664876 | 22          | TRUE         | TRUE              |
| 1     | NITNFRAIL  | 227   | 235  | 9              | HLA-A*02:01 | 227           | 22             | 8111.664876 | 22            | 8111.664876 | 22          | TRUE         | TRUE              |
| 1     | STSQKSIVA  | 668   | 676  | 9              | HLA-A*02:01 | 668           | 22             | 8205.593529 | 22            | 8205.593529 | 22          | TRUE         | TRUE              |
| 1     | AGWTFGAGA  | 866   | 874  | 9              | HLA-A*02:01 | 866           | 22             | 8552.833153 | 22            | 8552.833153 | 22          | TRUE         | TRUE              |
| 1     | STGNNVFQT  | 623   | 631  | 9              | HLA-A*02:01 | 623           | 22             | 8752.05423  | 22            | 8752.05423  | 22          | TRUE         | TRUE              |
| 1     | SIQIESLTT  | 914   | 922  | 9              | HLA-A*02:01 | 914           | 22             | 8955.915762 | 22            | 8955.915762 | 22          | TRUE         | TRUE              |
| 1     | IEDLLFNKV  | 800   | 808  | 9              | HLA-A*02:01 | 800           | 22             | 8976.56128  | 22            | 8976.56128  | 22          | TRUE         | TRUE              |
| 1     | FELCDNPF   | 130   | 138  | 9              | HLA-A*02:01 | 130           | 22             | 9017.995204 | 22            | 9017.995204 | 22          | TRUE         | TRUE              |
| 1     | LIRAAEIRA  | 994   | 1002 | 9              | HLA-A*02:01 | 994           | 23             | 9249.32415  | 23            | 9249.32415  | 23          | TRUE         | TRUE              |
| 1     | VTILLCCMT  | 1212  | 1220 | 9              | HLA-A*02:01 | 1212          | 23             | 9313.437404 | 23            | 9313.437404 | 23          | TRUE         | TRUE              |
| 1     | GIGVTQNVL  | 890   | 898  | 9              | HLA-A*02:01 | 890           | 23             | 9356.42628  | 23            | 9356.42628  | 23          | TRUE         | TRUE              |
| 1     | TFVSGNCDV  | 1102  | 1110 | 9              | HLA-A*02:01 | 1102          | 23             | 9421.281926 | 23            | 9421.281926 | 23          | TRUE         | TRUE              |
| 1     | QIPFAMQMA  | 877   | 885  | 9              | HLA-A*02:01 | 877           | 23             | 9443.000224 | 23            | 9443.000224 | 23          | TRUE         | TRUE              |
| 1     | NASSEVAVL  | 589   | 597  | 9              | HLA-A*02:01 | 589           | 23             | 9443.000224 | 23            | 9443.000224 | 23          | TRUE         | TRUE              |
| 1     | SISITTEVM  | 701   | 709  | 9              | HLA-A*02:01 | 701           | 23             | 9596.436635 | 23            | 9596.436635 | 23          | TRUE         | TRUE              |
| 1     | QTVYTQQUL  | 987   | 995  | 9              | HLA-A*02:01 | 987           | 23             | 9618.558706 | 23            | 9618.558706 | 23          | TRUE         | TRUE              |
| 1     | LMSFPQAAP  | 1031  | 1039 | 9              | HLA-A*02:01 | 1031          | 23             | 9752.366186 | 23            | 9752.366186 | 23          | TRUE         | TRUE              |
| 1     | TLTSLGSDL  | 8     | 16   | 9              | HLA-A*02:01 | 8             | 23             | 9979.52798  | 23            | 9979.52798  | 23          | TRUE         | TRUE              |
| 1     | FSLDVSSEK  | 168   | 176  | 9              | HLA-A*02:01 | 168           | 23             | 9979.52798  | 23            | 9979.52798  | 23          | TRUE         | TRUE              |
| 1     | VLPLPLTDD  | 842   | 850  | 9              | HLA-A*02:01 | 842           | 23             | 10095.08546 | 23            | 10095.08546 | 23          | TRUE         | TRUE              |
| 1     | SVITPGTNA  | 582   | 590  | 9              | HLA-A*02:01 | 582           | 23             | 10118.35704 | 23            | 10118.35704 | 23          | TRUE         | TRUE              |
| 1     | VTQQLIRAA  | 990   | 998  | 9              | HLA-A*02:01 | 990           | 23             | 10141.68226 | 23            | 10141.68226 | 23          | TRUE         | TRUE              |
| 1     | LYNSTFFST  | 355   | 363  | 9              | HLA-A*02:01 | 355           | 23             | 10141.68226 | 23            | 10141.68226 | 23          | TRUE         | TRUE              |
| 1     | NGIGVQTQNV | 889   | 897  | 9              | HLA-A*02:01 | 889           | 24             | 10165.0613  | 24            | 10165.0613  | 24          | TRUE         | TRUE              |
| 1     | TQDLFLPFY  | 55    | 63   | 9              | HLA-A*02:01 | 55            | 24             | 10211.98104 | 24            | 10211.98104 | 24          | TRUE         | TRUE              |
| 1     | ITTDNTFVS  | 1097  | 1105 | 9              | HLA-A*02:01 | 1097          | 24             | 10282.76712 | 24            | 10282.76712 | 24          | TRUE         | TRUE              |
| 1     | QKFNGLTVL  | 835   | 843  | 9              | HLA-A*02:01 | 835           | 24             | 10354.04385 | 24            | 10354.04385 | 24          | TRUE         | TRUE              |
| 1     | QMYKPTPLK  | 769   | 777  | 9              | HLA-A*02:01 | 769           | 24             | 10546.5399  | 24            | 10546.5399  | 24          | TRUE         | TRUE              |
| 1     | VRFPNITNL  | 314   | 322  | 9              | HLA-A*02:01 | 314           | 24             | 10570.85218 | 24            | 10570.85218 | 24          | TRUE         | TRUE              |
| 1     | EYISDAFSL  | 162   | 170  | 9              | HLA-A*02:01 | 162           | 24             | 10693.25688 | 24            | 10693.25688 | 24          | TRUE         | TRUE              |
| 1     | GCLIGAEHV  | 634   | 642  | 9              | HLA-A*02:01 | 634           | 25             | 11326.87219 | 25            | 11326.87219 | 25          | TRUE         | TRUE              |
| 1     | FLTLTSGSD  | 7     | 15   | 9              | HLA-A*02:01 | 7             | 25             | 11405.38632 | 25            | 11405.38632 | 25          | TRUE         | TRUE              |
| 1     | CLIGAEHVD  | 635   | 643  | 9              | HLA-A*02:01 | 635           | 25             | 11510.91906 | 25            | 11510.91906 | 25          | TRUE         | TRUE              |
| 1     | FVFNKNDGF  | 185   | 193  | 9              | HLA-A*02:01 | 185           | 25             | 11564.05104 | 25            | 11564.05104 | 25          | TRUE         | TRUE              |
| 1     | EIDKGIYQT  | 294   | 302  | 9              | HLA-A*02:01 | 294           | 25             | 11671.0519  | 25            | 11671.0519  | 25          | TRUE         | TRUE              |
| 1     | YIKWVWYVW  | 1191  | 1199 | 9              | HLA-A*02:01 | 1191          | 25             | 11942.90561 | 25            | 11942.90561 | 25          | TRUE         | TRUE              |
| 1     | FSPDGPCTP  | 460   | 468  | 9              | HLA-A*02:01 | 460           | 25             | 11998.03156 | 25            | 11998.03156 | 25          | TRUE         | TRUE              |
| 1     | TMSLGADSS  | 678   | 686  | 9              | HLA-A*02:01 | 678           | 25             | 12053.41196 | 25            | 12053.41196 | 25          | TRUE         | TRUE              |
| 1     | FGGFNFQSI  | 779   | 787  | 9              | HLA-A*02:01 | 779           | 26             | 12621.47176 | 26            | 12621.47176 | 26          | TRUE         | TRUE              |
| 1     | IPTNFISJI  | 696   | 704  | 9              | HLA-A*02:01 | 696           | 26             | 12679.72983 | 26            | 12679.72983 | 26          | TRUE         | TRUE              |
| 1     | RGVYYPDEI  | 38    | 46   | 9              | HLA-A*02:01 | 38            | 26             | 12708.95963 | 26            | 12708.95963 | 26          | TRUE         | TRUE</            |

| seq # | peptide    | start | end  | peptide length | allele      | peptide index | median binding | smm IC50    | smm percentil | legacy IC50 | legacy rank | scores equal | percentiles equal |
|-------|------------|-------|------|----------------|-------------|---------------|----------------|-------------|---------------|-------------|-------------|--------------|-------------------|
| 1     | ITTEVMPVS  | 704   | 712  | 9              | HLA-A*02:01 | 704           | 26             | 13338.59235 | 26            | 13338.59235 | 26          | TRUE         | TRUE              |
| 1     | YLRHGKLRP  | 442   | 450  | 9              | HLA-A*02:01 | 442           | 26             | 13338.59235 | 26            | 13338.59235 | 26          | TRUE         | TRUE              |
| 1     | FCGKGYHLM  | 1024  | 1032 | 9              | HLA-A*02:01 | 1024          | 26             | 13586.5753  | 26            | 13586.5753  | 26          | TRUE         | TRUE              |
| 1     | GGFNFSQL   | 780   | 788  | 9              | HLA-A*02:01 | 780           | 26             | 13743.90042 | 26            | 13743.90042 | 26          | TRUE         | TRUE              |
| 1     | TTSTALGKL  | 922   | 930  | 9              | HLA-A*02:01 | 922           | 26             | 13743.90042 | 26            | 13743.90042 | 26          | TRUE         | TRUE              |
| 1     | FNLGTGTGV  | 529   | 537  | 9              | HLA-A*02:01 | 529           | 26             | 13999.41861 | 26            | 13999.41861 | 26          | TRUE         | TRUE              |
| 1     | SLLRSTSQK  | 664   | 672  | 9              | HLA-A*02:01 | 664           | 26             | 14161.52424 | 26            | 14161.52424 | 26          | TRUE         | TRUE              |
| 1     | NAFNCTFEY  | 155   | 163  | 9              | HLA-A*02:01 | 155           | 26             | 14194.16992 | 26            | 14194.16992 | 26          | TRUE         | TRUE              |
| 1     | NLLLOYGSF  | 733   | 741  | 9              | HLA-A*02:01 | 733           | 27             | 14558.27772 | 27            | 14558.27772 | 27          | TRUE         | TRUE              |
| 1     | VTQNVLYEN  | 893   | 901  | 9              | HLA-A*02:01 | 893           | 27             | 14591.83802 | 27            | 14591.83802 | 27          | TRUE         | TRUE              |
| 1     | KTSEILDIS  | 566   | 574  | 9              | HLA-A*02:01 | 566           | 27             | 14692.98381 | 27            | 14692.98381 | 27          | TRUE         | TRUE              |
| 1     | DLFLPFYSN  | 57    | 65   | 9              | HLA-A*02:01 | 57            | 27             | 15000.6473  | 27            | 15000.6473  | 27          | TRUE         | TRUE              |
| 1     | RNFTTAPAI  | 1055  | 1063 | 9              | HLA-A*02:01 | 1055          | 27             | 15174.34661 | 27            | 15174.34661 | 27          | TRUE         | TRUE              |
| 1     | GADSIAYS   | 682   | 690  | 9              | HLA-A*02:01 | 682           | 27             | 15209.32709 | 27            | 15209.32709 | 27          | TRUE         | TRUE              |
| 1     | PVSMAKTSV  | 710   | 718  | 9              | HLA-A*02:01 | 710           | 27             | 15244.38821 | 27            | 15244.38821 | 27          | TRUE         | TRUE              |
| 1     | VSATKLNDL  | 369   | 377  | 9              | HLA-A*02:01 | 369           | 27             | 15279.53016 | 27            | 15279.53016 | 27          | TRUE         | TRUE              |
| 1     | ISGINASVV  | 1151  | 1159 | 9              | HLA-A*02:01 | 1151          | 27             | 15350.05727 | 27            | 15350.05727 | 27          | TRUE         | TRUE              |
| 1     | LTPAWRIYS  | 615   | 623  | 9              | HLA-A*02:01 | 615           | 27             | 15420.90991 | 27            | 15420.90991 | 27          | TRUE         | TRUE              |
| 1     | SFIEDLLFN  | 798   | 806  | 9              | HLA-A*02:01 | 798           | 27             | 15420.90991 | 27            | 15420.90991 | 27          | TRUE         | TRUE              |
| 1     | SQERNFTTA  | 1052  | 1060 | 9              | HLA-A*02:01 | 1052          | 27             | 15420.90991 | 27            | 15420.90991 | 27          | TRUE         | TRUE              |
| 1     | FPSVYAWER  | 334   | 342  | 9              | HLA-A*02:01 | 334           | 27             | 15635.43614 | 27            | 15635.43614 | 27          | TRUE         | TRUE              |
| 1     | TLVKQLSSN  | 943   | 951  | 9              | HLA-A*02:01 | 943           | 27             | 15707.60603 | 27            | 15707.60603 | 27          | TRUE         | TRUE              |
| 1     | IINNTVYDP  | 1114  | 1122 | 9              | HLA-A*02:01 | 1114          | 27             | 15889.49154 | 27            | 15889.49154 | 27          | TRUE         | TRUE              |
| 1     | RASANLAAT  | 1001  | 1009 | 9              | HLA-A*02:01 | 1001          | 28             | 16147.675   | 28            | 16147.675   | 28          | TRUE         | TRUE              |
| 1     | KYGGGFNFS  | 777   | 785  | 9              | HLA-A*02:01 | 777           | 28             | 16869.80257 | 28            | 16869.80257 | 28          | TRUE         | TRUE              |
| 1     | EILDSPCS   | 569   | 577  | 9              | HLA-A*02:01 | 569           | 28             | 16869.8026  | 28            | 16869.8026  | 28          | TRUE         | TRUE              |
| 1     | SNVTGFHTI  | 64    | 72   | 9              | HLA-A*02:01 | 64            | 28             | 16986.73845 | 28            | 16986.73845 | 28          | TRUE         | TRUE              |
| 1     | INHFTGNPV  | 72    | 80   | 9              | HLA-A*02:01 | 72            | 28             | 17025.89693 | 28            | 17025.89693 | 28          | TRUE         | TRUE              |
| 1     | VVLSELLN   | 497   | 505  | 9              | HLA-A*02:01 | 497           | 28             | 17262.75075 | 28            | 17262.75075 | 28          | TRUE         | TRUE              |
| 1     | SNVYADSFV  | 380   | 388  | 9              | HLA-A*02:01 | 380           | 28             | 17302.5455  | 28            | 17302.5455  | 28          | TRUE         | TRUE              |
| 1     | YSNVTFGHT  | 63    | 71   | 9              | HLA-A*02:01 | 63            | 28             | 17302.5455  | 28            | 17302.5455  | 28          | TRUE         | TRUE              |
| 1     | WVVGFTMNN  | 101   | 109  | 9              | HLA-A*02:01 | 101           | 29             | 17705.57356 | 29            | 17705.57356 | 29          | TRUE         | TRUE              |
| 1     | SPAQDIWGT  | 239   | 247  | 9              | HLA-A*02:01 | 239           | 29             | 18034.74475 | 29            | 18034.74475 | 29          | TRUE         | TRUE              |
| 1     | GTNASSEVA  | 587   | 595  | 9              | HLA-A*02:01 | 587           | 29             | 18159.75563 | 29            | 18159.75563 | 29          | TRUE         | TRUE              |
| 1     | ITNFRAILT  | 228   | 236  | 9              | HLA-A*02:01 | 228           | 29             | 18285.63304 | 29            | 18285.63304 | 29          | TRUE         | TRUE              |
| 1     | KSNVVRGWV  | 94    | 102  | 9              | HLA-A*02:01 | 94            | 29             | 18285.63304 | 29            | 18285.63304 | 29          | TRUE         | TRUE              |
| 1     | SSIAYSNN   | 685   | 693  | 9              | HLA-A*02:01 | 685           | 29             | 18370.03569 | 29            | 18370.03569 | 29          | TRUE         | TRUE              |
| 1     | NLCPGGEVF  | 321   | 329  | 9              | HLA-A*02:01 | 321           | 29             | 18668.52475 | 29            | 18668.52475 | 29          | TRUE         | TRUE              |
| 1     | LSFELNAP   | 499   | 507  | 9              | HLA-A*02:01 | 499           | 29             | 18754.69475 | 29            | 18754.69475 | 29          | TRUE         | TRUE              |
| 1     | LKYDENGTI  | 264   | 272  | 9              | HLA-A*02:01 | 264           | 29             | 18754.69475 | 29            | 18754.69475 | 29          | TRUE         | TRUE              |
| 1     | FELLNAPAT  | 501   | 509  | 9              | HLA-A*02:01 | 501           | 29             | 19015.59854 | 29            | 19015.59854 | 29          | TRUE         | TRUE              |
| 1     | OYGSFCTQL  | 737   | 745  | 9              | HLA-A*02:01 | 737           | 29             | 19059.43402 | 29            | 19059.43402 | 29          | TRUE         | TRUE              |
| 1     | YQPIDVVRD  | 200   | 208  | 9              | HLA-A*02:01 | 200           | 29             | 19059.43402 | 29            | 19059.43402 | 29          | TRUE         | TRUE              |
| 1     | TTFDVQAP   | 20    | 28   | 9              | HLA-A*02:01 | 20            | 29             | 19103.37056 | 29            | 19103.37056 | 29          | TRUE         | TRUE              |
| 1     | ISSVLNDIL  | 955   | 963  | 9              | HLA-A*02:01 | 955           | 30             | 19369.12491 | 30            | 19369.12491 | 30          | TRUE         | TRUE              |
| 1     | IANQFNKAI  | 905   | 913  | 9              | HLA-A*02:01 | 905           | 30             | 19458.52873 | 30            | 19458.52873 | 30          | TRUE         | TRUE              |
| 1     | IAGLIAIYM  | 1203  | 1211 | 9              | HLA-A*02:01 | 1203          | 30             | 19503.38527 | 30            | 19503.38527 | 30          | TRUE         | TRUE              |
| 1     | IIVAYTMSLG | 674   | 682  | 9              | HLA-A*02:01 | 674           | 30             | 19503.38527 | 30            | 19503.38527 | 30          | TRUE         | TRUE              |
| 1     | FCTQLNRAL  | 741   | 749  | 9              | HLA-A*02:01 | 741           | 30             | 19820.28979 | 30            | 19820.28979 | 30          | TRUE         | TRUE              |
| 1     | ICAQKFNGL  | 832   | 840  | 9              | HLA-A*02:01 | 832           | 30             | 19957.67748 | 30            | 19957.67748 | 30          | TRUE         | TRUE              |
| 1     | EVAVLYQDV  | 593   | 601  | 9              | HLA-A*02:01 | 593           | 30             | 20096.01749 | 30            | 20096.01749 | 30          | TRUE         | TRUE              |
| 1     | VSGNCDVVI  | 1104  | 1112 | 9              | HLA-A*02:01 | 1104          | 30             | 20142.34359 | 30            | 20142.34359 | 30          | TRUE         | TRUE              |
| 1     | KAISQIQES  | 911   | 919  | 9              | HLA-A*02:01 | 911           | 30             | 20235.31643 | 30            | 20235.31643 | 30          | TRUE         | TRUE              |
| 1     | INARDLICA  | 826   | 834  | 9              | HLA-A*02:01 | 826           | 30             | 20375.58094 | 30            | 20375.58094 | 30          | TRUE         | TRUE              |
| 1     | INTNLCPFG  | 318   | 326  | 9              | HLA-A*02:01 | 318           | 30             | 20611.51905 | 30            | 20611.51905 | 30          | TRUE         | TRUE              |
| 1     | KQYGECLGD  | 817   | 825  | 9              | HLA-A*02:01 | 817           | 30             | 20754.39127 | 30            | 20754.39127 | 30          | TRUE         | TRUE              |
| 1     | PFKQGIYFA  | 82    | 90   | 9              | HLA-A*02:01 | 82            | 30             | 20994.7158  | 30            | 20994.7158  | 30          | TRUE         | TRUE              |
| 1     | AMQGMAYRFN | 881   | 889  | 9              | HLA-A*02:01 | 881           | 30             | 21091.623   | 30            | 21091.623   | 30          | TRUE         | TRUE              |
| 1     | NSTNVVIRA  | 119   | 127  | 9              | HLA-A*02:01 | 119           | 30             | 21091.623   | 30            | 21091.623   | 30          | TRUE         | TRUE              |
| 1     | FFSTFKCYG  | 360   | 368  | 9              | HLA-A*02:01 | 360           | 31             | 21286.78139 | 31            | 21286.78139 | 31          | TRUE         | TRUE              |
| 1     | AGICASYHT  | 654   | 662  | 9              | HLA-A*02:01 | 654           | 31             | 21682.5322  | 31            | 21682.5322  | 31          | TRUE         | TRUE              |
| 1     | TNLCPPGEV  | 320   | 328  | 9              | HLA-A*02:01 | 320           | 31             | 21732.5156  | 31            | 21732.5156  | 31          | TRUE         | TRUE              |
| 1     | GYLKPTTFM  | 255   | 263  | 9              | HLA-A*02:01 | 255           | 31             | 21782.61422 | 31            | 21782.61422 | 31          | TRUE         | TRUE              |
| 1     | TNASSEVAV  | 588   | 596  | 9              | HLA-A*02:01 | 588           | 31             | 21782.61422 | 31            | 21782.61422 | 31          | TRUE         | TRUE              |
| 1     | VFLHVTVVP  | 1043  | 1051 | 9              | HLA-A*02:01 | 1043          | 31             | 21832.82833 | 31            | 21832.82833 | 31          | TRUE         | TRUE              |
| 1     | PVIFPKDGI  | 79    | 87   | 9              | HLA-A*02:01 | 79            | 31             | 21933.60409 | 31            | 21933.60409 | 31          | TRUE         | TRUE              |
| 1     | YKLPDFMFG  | 410   | 418  | 9              | HLA-A*02:01 | 410           | 31             | 22034.84501 | 31            | 22034.84501 | 31          | TRUE         | TRUE              |
| 1     | ADYSVLVNS  | 350   | 358  | 9              | HLA-A*02:01 | 350           | 31             | 22289.99649 | 31            | 22289.99649 | 31          | TRUE         | TRUE              |
| 1     | YSVLVNSTF  | 352   | 360  | 9              | HLA-A*02:01 | 352           | 31             | 22444.50336 | 31            | 22444.50336 | 31          | TRUE         | TRUE              |
| 1     | LKPIFKLPL  | 216   | 224  | 9              | HLA-A*02:01 | 216           | 31             | 22652.17979 | 31            | 22652.17979 | 31          | TRUE         | TRUE              |
| 1     | GIWYQSNFR  | 298   | 306  | 9              | HLA-A*02:01 | 298           | 31             | 22756.7375  | 31            | 22756.7375  | 31          | TRUE         | TRUE              |
| 1     | SAAAYFVGY  | 248   | 256  | 9              | HLA-A*02:01 | 248           | 31             | 22861.77783 | 31            | 22861.77783 | 31          | TRUE         | TRUE              |
| 1     | CVLAWNTRN  | 419   | 427  | 9              | HLA-A*02:01 | 419           | 31             | 23179.81684 | 31            | 23179.81684 | 31          | TRUE         | TRUE              |
| 1     | KISNCVADY  | 344   | 352  | 9              | HLA-A*02:01 | 344           | 31             | 23502.28021 | 31            | 23502.28021 | 31          | TRUE         | TRUE              |
| 1     | YFGGFNFSQ  | 778   | 786  | 9              | HLA-A*02:01 | 778           | 31             | 23502.28021 | 31            | 23502.28021 | 31          | TRUE         | TRUE              |
| 1     | TDLIKNCVQ  | 517   | 525  | 9              | HLA-A*02:01 | 517           | 32             | 23884.16155 | 32            | 23884.16155 | 32          | TRUE         | TRUE              |
| 1     | NFGAISSVL  | 951   | 959  | 9              | HLA-A*02:01 | 951           | 32             | 23884.16155 | 32            | 23884.16155 | 32          | TRUE         | TRUE              |
| 1     | VLTPTSCKRF | 537   | 545  | 9              | HLA-A*02:01 | 537           | 32             | 23994.40583 | 32            | 23994.40583 | 32          | TRUE         | TRUE              |
| 1     | SFCTQLNRRA | 740   | 748  | 9              | HLA-A*02:01 | 740           | 32             | 24105.15897 | 32            | 24105.15897 | 32          | TRUE         | TRUE              |
| 1     | GKPCPTPAL  | 464   | 472  | 9              | HLA-A*02:01 | 464           | 32             | 24553.30734 | 32            | 24553.30734 | 32          | TRUE         | TRUE              |
| 1     | TLTSGSDLD  | 9     | 17   | 9              | HLA-A*02:01 | 9             | 32             | 24553.30734 | 32            | 24553.30734 | 32          | TRUE         | TRUE              |
| 1     | ATKFPVSYA  | 331   | 339  | 9              | HLA-A*02:01 | 331           | 32             | 24609.90856 | 32            | 24609.90856 | 32          | TRUE         | TRUE              |
| 1     | CDIPIGAGI  | 648   | 656  | 9              | HLA-A*02:01 | 648           | 32             | 24666.64026 | 32            | 24666.64026 | 32          | TRUE         | TRUE              |
| 1     | IINNTVYDPL | 1115  | 1123 | 9              | HLA-A*02:01 | 1115          | 32             | 24780.49629 | 32            | 24780.49629 | 32          | TRUE         | TRUE              |
| 1     | FPREGVVFV  | 1071  | 1079 | 9              | HLA-A*02:01 | 1071          | 32             | 24837.62124 | 32            | 24837.62124 | 32          | TRUE         | TRUE              |
| 1     | DLDRCTTFD  | 15    | 23   | 9              | HLA-A*02:01 | 15            | 32             | 24837.62124 | 32            | 24837.62124 | 32          | TRUE         | TRUE              |
| 1     | GQSKRVDFC  | 1017  | 1025 | 9              | HLA-A*02:01 | 1017          | 32             | 24894.87787 | 32            | 24894.87787 | 32          | TRUE         | TRUE              |
| 1     | AVLYQDVNC  | 595   | 603  | 9              | HLA-A*02:01 | 595           | 32             | 25299.38709 | 32            | 25299.38709 | 32          | TRUE         | TRUE              |
| 1     | LNDYGYFTT  | 478   | 486  | 9              | HLA-A*02:01 | 478           | 32             | 25299.38709 | 32            | 25299.38709 | 32          | TRUE         | TRUE              |
| 1     | MTSCCCKCL  | 1219  | 1227 | 9              | HLA-A*02:01 | 1219          | 32             | 25357.7082  | 32            | 25357.7082  | 32          | TRUE         | TRUE              |
| 1     | VITPGTNAS  | 583   | 591  | 9              | HLA-A*02:01 | 583           | 32             | 25357.7082  | 32            | 25357.7082  | 32          | TRUE         | TRUE              |
| 1     | FKCYGVSAT  | 364   | 372  | 9              | HLA-A*02:01 | 364           | 32             | 25533.47944 | 32            | 25533.47944 | 32          | TRUE         | TRUE              |
| 1     | IAPGQTGVI  | 397   | 405  | 9              | HLA-A*02:01 | 397           | 32             | 25769.73782 | 32            | 25769.73782 | 32          | TRUE         | TRUE              |
| 1     | FGNPVIPEK  | 76    | 84   | 9              | HLA-A*02:01 | 76            | 32             | 25829.1432  | 32            | 25829.1432  | 32          | TRUE         | TRUE              |
| 1     | YW         |       |      |                |             |               |                |             |               |             |             |              |                   |

| seq # | peptide    | start | end  | peptide length | allele      | peptide index | median binding | smm IC50    | smm percentil | legacy IC50 | legacy rank | scores equal | percentiles equal |
|-------|------------|-------|------|----------------|-------------|---------------|----------------|-------------|---------------|-------------|-------------|--------------|-------------------|
| 1     | AYRFGNGIV  | 885   | 893  | 9              | HLA-A*02:01 | 885           | 33             | 27422.68658 | 33            | 27422.68658 | 33          | TRUE         | TRUE              |
| 1     | LQYGSFCTQ  | 736   | 744  | 9              | HLA-A*02:01 | 736           | 33             | 27740.22632 | 33            | 27740.22632 | 33          | TRUE         | TRUE              |
| 1     | QILPDIKPK  | 786   | 794  | 9              | HLA-A*02:01 | 786           | 33             | 27740.22632 | 33            | 27740.22632 | 33          | TRUE         | TRUE              |
| 1     | KTPTLKVFG  | 772   | 780  | 9              | HLA-A*02:01 | 772           | 33             | 28126.13131 | 33            | 28126.13131 | 33          | TRUE         | TRUE              |
| 1     | ITQRNFFSP  | 1086  | 1094 | 9              | HLA-A*02:01 | 1086          | 34             | 28190.96874 | 34            | 28190.96874 | 34          | TRUE         | TRUE              |
| 1     | TPAWRYIST  | 616   | 624  | 9              | HLA-A*02:01 | 616           | 34             | 28255.95556 | 34            | 28255.95556 | 34          | TRUE         | TRUE              |
| 1     | TITDAVDCS  | 271   | 279  | 9              | HLA-A*02:01 | 271           | 34             | 28386.3792  | 34            | 28386.3792  | 34          | TRUE         | TRUE              |
| 1     | VAKNLNLSL  | 1171  | 1179 | 9              | HLA-A*02:01 | 1171          | 34             | 28451.81656 | 34            | 28451.81656 | 34          | TRUE         | TRUE              |
| 1     | VDCSQNPILA | 276   | 284  | 9              | HLA-A*02:01 | 276           | 34             | 28517.40477 | 34            | 28517.40477 | 34          | TRUE         | TRUE              |
| 1     | FGRDVSDFT  | 551   | 559  | 9              | HLA-A*02:01 | 551           | 34             | 28649.03513 | 34            | 28649.03513 | 34          | TRUE         | TRUE              |
| 1     | NVFTQAGC   | 627   | 635  | 9              | HLA-A*02:01 | 627           | 34             | 29114.54451 | 34            | 29114.54451 | 34          | TRUE         | TRUE              |
| 1     | AEIRASANL  | 998   | 1006 | 9              | HLA-A*02:01 | 998           | 34             | 29316.35689 | 34            | 29316.35689 | 34          | TRUE         | TRUE              |
| 1     | ESLIDQL    | 1177  | 1185 | 9              | HLA-A*02:01 | 1177          | 34             | 29316.35689 | 34            | 29316.35689 | 34          | TRUE         | TRUE              |
| 1     | QFNKAISQI  | 908   | 916  | 9              | HLA-A*02:01 | 908           | 34             | 29451.67504 | 34            | 29451.67504 | 34          | TRUE         | TRUE              |
| 1     | TAALVSGTA  | 856   | 864  | 9              | HLA-A*02:01 | 856           | 34             | 29451.67504 | 34            | 29451.67504 | 34          | TRUE         | TRUE              |
| 1     | FSNVYADSF  | 379   | 387  | 9              | HLA-A*02:01 | 379           | 34             | 29519.56816 | 34            | 29519.56816 | 34          | TRUE         | TRUE              |
| 1     | YEYQIKWPW  | 1188  | 1196 | 9              | HLA-A*02:01 | 1188          | 34             | 30207.16724 | 34            | 30207.16724 | 34          | TRUE         | TRUE              |
| 1     | GTSWFITQR  | 1081  | 1089 | 9              | HLA-A*02:01 | 1081          | 34             | 30416.55332 | 34            | 30416.55332 | 34          | TRUE         | TRUE              |
| 1     | LAATKMSEC  | 1006  | 1014 | 9              | HLA-A*02:01 | 1006          | 34             | 30486.67072 | 34            | 30486.67072 | 34          | TRUE         | TRUE              |
| 1     | DISPSCFSG  | 572   | 580  | 9              | HLA-A*02:01 | 572           | 34             | 30768.76041 | 34            | 30768.76041 | 34          | TRUE         | TRUE              |
| 1     | CTTFDDVQA  | 19    | 27   | 9              | HLA-A*02:01 | 19            | 35             | 30982.03926 | 35            | 30982.03926 | 35          | TRUE         | TRUE              |
| 1     | LTVLPLIT   | 840   | 848  | 9              | HLA-A*02:01 | 840           | 35             | 31053.46024 | 35            | 31053.46024 | 35          | TRUE         | TRUE              |
| 1     | QDLFLPFSY  | 56    | 64   | 9              | HLA-A*02:01 | 56            | 35             | 31053.46024 | 35            | 31053.46024 | 35          | TRUE         | TRUE              |
| 1     | LICAQKFGN  | 831   | 839  | 9              | HLA-A*02:01 | 831           | 35             | 31268.71254 | 35            | 31268.71254 | 35          | TRUE         | TRUE              |
| 1     | TNFRALITA  | 229   | 237  | 9              | HLA-A*02:01 | 229           | 35             | 31340.79437 | 35            | 31340.79437 | 35          | TRUE         | TRUE              |
| 1     | GIYFAATEK  | 86    | 94   | 9              | HLA-A*02:01 | 86            | 35             | 31485.4569  | 35            | 31485.4569  | 35          | TRUE         | TRUE              |
| 1     | HTMIFDPAF  | 149   | 157  | 9              | HLA-A*02:01 | 149           | 35             | 31630.78717 | 35            | 31630.78717 | 35          | TRUE         | TRUE              |
| 1     | IPIGAGICA  | 650   | 658  | 9              | HLA-A*02:01 | 650           | 35             | 31776.78825 | 35            | 31776.78825 | 35          | TRUE         | TRUE              |
| 1     | LLRSTSQKS  | 665   | 673  | 9              | HLA-A*02:01 | 665           | 35             | 31850.04131 | 35            | 31850.04131 | 35          | TRUE         | TRUE              |
| 1     | FNGTSWFIT  | 1079  | 1087 | 9              | HLA-A*02:01 | 1079          | 35             | 32218.84741 | 35            | 32218.84741 | 35          | TRUE         | TRUE              |
| 1     | QIDRLITGR  | 974   | 982  | 9              | HLA-A*02:01 | 974           | 35             | 32218.84741 | 35            | 32218.84741 | 35          | TRUE         | TRUE              |
| 1     | YNNKYRYLR  | 436   | 444  | 9              | HLA-A*02:01 | 436           | 35             | 32442.17779 | 35            | 32442.17779 | 35          | TRUE         | TRUE              |
| 1     | DTLYITQDL  | 50    | 58   | 9              | HLA-A*02:01 | 50            | 35             | 32742.36157 | 35            | 32742.36157 | 35          | TRUE         | TRUE              |
| 1     | KPMGTQTHT  | 142   | 150  | 9              | HLA-A*02:01 | 142           | 35             | 33121.50024 | 35            | 33121.50024 | 35          | TRUE         | TRUE              |
| 1     | VRDPKTSEI  | 562   | 570  | 9              | HLA-A*02:01 | 562           | 35             | 33274.38214 | 35            | 33274.38214 | 35          | TRUE         | TRUE              |
| 1     | GVFVFNNGS  | 1075  | 1083 | 9              | HLA-A*02:01 | 1075          | 35             | 33582.26621 | 35            | 33582.26621 | 35          | TRUE         | TRUE              |
| 1     | QLIRAAEIR  | 993   | 1001 | 9              | HLA-A*02:01 | 993           | 36             | 33892.99909 | 36            | 33892.99909 | 36          | TRUE         | TRUE              |
| 1     | HTVSLLRST  | 661   | 669  | 9              | HLA-A*02:01 | 661           | 36             | 34049.44207 | 36            | 34049.44207 | 36          | TRUE         | TRUE              |
| 1     | RAILTAESP  | 232   | 240  | 9              | HLA-A*02:01 | 232           | 36             | 34049.44207 | 36            | 34049.44207 | 36          | TRUE         | TRUE              |
| 1     | QPIDVVRDL  | 201   | 209  | 9              | HLA-A*02:01 | 201           | 36             | 34364.49768 | 36            | 34364.49768 | 36          | TRUE         | TRUE              |
| 1     | IGYQPYRVV  | 489   | 497  | 9              | HLA-A*02:01 | 489           | 36             | 34364.49768 | 36            | 34364.49768 | 36          | TRUE         | TRUE              |
| 1     | AWNTRNRIDA | 422   | 430  | 9              | HLA-A*02:01 | 422           | 36             | 34523.11699 | 36            | 34523.11699 | 36          | TRUE         | TRUE              |
| 1     | GVIADYNYK  | 403   | 411  | 9              | HLA-A*02:01 | 403           | 36             | 34523.11699 | 36            | 34523.11699 | 36          | TRUE         | TRUE              |
| 1     | FDNAFNCTF  | 153   | 161  | 9              | HLA-A*02:01 | 153           | 36             | 35164.94966 | 36            | 35164.94966 | 36          | TRUE         | TRUE              |
| 1     | IFDNAFNCT  | 152   | 160  | 9              | HLA-A*02:01 | 152           | 36             | 35654.14284 | 36            | 35654.14284 | 36          | TRUE         | TRUE              |
| 1     | RSTSQKSVI  | 667   | 675  | 9              | HLA-A*02:01 | 667           | 36             | 36150.14137 | 36            | 36150.14137 | 36          | TRUE         | TRUE              |
| 1     | VKGDVDRQI  | 389   | 397  | 9              | HLA-A*02:01 | 389           | 36             | 36400.72218 | 36            | 36400.72218 | 36          | TRUE         | TRUE              |
| 1     | TKFPSVYAW  | 332   | 340  | 9              | HLA-A*02:01 | 332           | 36             | 36400.72218 | 36            | 36400.72218 | 36          | TRUE         | TRUE              |
| 1     | IRASANLAA  | 1000  | 1008 | 9              | HLA-A*02:01 | 1000          | 36             | 36568.74028 | 36            | 36568.74028 | 36          | TRUE         | TRUE              |
| 1     | TAFSAPAQDI | 236   | 244  | 9              | HLA-A*02:01 | 236           | 36             | 36568.74028 | 36            | 36568.74028 | 36          | TRUE         | TRUE              |
| 1     | VADYSVLVN  | 349   | 357  | 9              | HLA-A*02:01 | 349           | 36             | 36992.1863  | 36            | 36992.1863  | 36          | TRUE         | TRUE              |
| 1     | ALQIPFAMQ  | 875   | 883  | 9              | HLA-A*02:01 | 875           | 36             | 36992.18633 | 36            | 36992.18633 | 36          | TRUE         | TRUE              |
| 1     | NQNAQALNT  | 935   | 943  | 9              | HLA-A*02:01 | 935           | 37             | 37077.46213 | 37            | 37077.46213 | 37          | TRUE         | TRUE              |
| 1     | NTIAIPTNF  | 692   | 700  | 9              | HLA-A*02:01 | 692           | 37             | 37334.47082 | 37            | 37334.47082 | 37          | TRUE         | TRUE              |
| 1     | FRALITAFS  | 231   | 239  | 9              | HLA-A*02:01 | 231           | 37             | 37506.79891 | 37            | 37506.79891 | 37          | TRUE         | TRUE              |
| 1     | ICGDSSTEC  | 724   | 732  | 9              | HLA-A*02:01 | 724           | 37             | 37766.78362 | 37            | 37766.78362 | 37          | TRUE         | TRUE              |
| 1     | RGWVFGSGTM | 99    | 107  | 9              | HLA-A*02:01 | 99            | 37             | 37941.10717 | 37            | 37941.10717 | 37          | TRUE         | TRUE              |
| 1     | MGCVLAWNT  | 417   | 425  | 9              | HLA-A*02:01 | 417           | 37             | 38028.57045 | 37            | 38028.57045 | 37          | TRUE         | TRUE              |
| 1     | AIHADQLTP  | 609   | 617  | 9              | HLA-A*02:01 | 609           | 37             | 38468.92055 | 37            | 38468.92055 | 37          | TRUE         | TRUE              |
| 1     | LQPELDSFK  | 1123  | 1131 | 9              | HLA-A*02:01 | 1123          | 37             | 38557.60057 | 37            | 38557.60057 | 37          | TRUE         | TRUE              |
| 1     | CYWPPLNDYG | 474   | 482  | 9              | HLA-A*02:01 | 474           | 37             | 38557.60057 | 37            | 38557.60057 | 37          | TRUE         | TRUE              |
| 1     | LFLLTITSGS | 6     | 14   | 9              | HLA-A*02:01 | 6             | 37             | 38557.60057 | 37            | 38557.60057 | 37          | TRUE         | TRUE              |
| 1     | SLDSSEKSG  | 169   | 177  | 9              | HLA-A*02:01 | 169           | 37             | 38646.48502 | 37            | 38646.48502 | 37          | TRUE         | TRUE              |
| 1     | EIDRLNEVA  | 1164  | 1172 | 9              | HLA-A*02:01 | 1164          | 37             | 38735.57436 | 37            | 38735.57436 | 37          | TRUE         | TRUE              |
| 1     | TIAPITNFS  | 693   | 701  | 9              | HLA-A*02:01 | 693           | 37             | 38914.36965 | 37            | 38914.36965 | 37          | TRUE         | TRUE              |
| 1     | INITNFRAI  | 226   | 234  | 9              | HLA-A*02:01 | 226           | 37             | 39004.07654 | 37            | 39004.07654 | 37          | TRUE         | TRUE              |
| 1     | YRFNGIGVT  | 886   | 894  | 9              | HLA-A*02:01 | 886           | 37             | 39546.67729 | 37            | 39546.67729 | 37          | TRUE         | TRUE              |
| 1     | DDMIAAYTA  | 849   | 857  | 9              | HLA-A*02:01 | 849           | 37             | 39820.80176 | 37            | 39820.80176 | 37          | TRUE         | TRUE              |
| 1     | FTDSVRDPK  | 558   | 566  | 9              | HLA-A*02:01 | 558           | 37             | 39912.59819 | 37            | 39912.59819 | 37          | TRUE         | TRUE              |
| 1     | FVVKGGDVR  | 387   | 395  | 9              | HLA-A*02:01 | 387           | 37             | 39912.59819 | 37            | 39912.59819 | 37          | TRUE         | TRUE              |
| 1     | PLOPELDSF  | 1122  | 1130 | 9              | HLA-A*02:01 | 1122          | 37             | 39912.59819 | 37            | 39912.59819 | 37          | TRUE         | TRUE              |
| 1     | VVRDPLPSGF | 205   | 213  | 9              | HLA-A*02:01 | 205           | 37             | 39912.59819 | 37            | 39912.59819 | 37          | TRUE         | TRUE              |
| 1     | STGNVNYKY  | 432   | 440  | 9              | HLA-A*02:01 | 432           | 37             | 40004.60623 | 37            | 40004.60623 | 37          | TRUE         | TRUE              |
| 1     | DISNVPEFP  | 454   | 462  | 9              | HLA-A*02:01 | 454           | 37             | 40096.82638 | 37            | 40096.82638 | 37          | TRUE         | TRUE              |
| 1     | ATKMSCEVL  | 1008  | 1016 | 9              | HLA-A*02:01 | 1008          | 38             | 41410.45477 | 38            | 41410.45477 | 38          | TRUE         | TRUE              |
| 1     | FQQFGRDVS  | 548   | 556  | 9              | HLA-A*02:01 | 548           | 38             | 41505.91573 | 38            | 41505.91573 | 38          | TRUE         | TRUE              |
| 1     | WPWVYVLGF  | 1194  | 1202 | 9              | HLA-A*02:01 | 1194          | 38             | 41986.53158 | 38            | 41986.53158 | 38          | TRUE         | TRUE              |
| 1     | AIPTNFSIS  | 695   | 703  | 9              | HLA-A*02:01 | 695           | 38             | 41986.53158 | 38            | 41986.53158 | 38          | TRUE         | TRUE              |
| 1     | QYGECLGDI  | 818   | 826  | 9              | HLA-A*02:01 | 818           | 38             | 42083.32054 | 38            | 42083.32054 | 38          | TRUE         | TRUE              |
| 1     | YAWERKKIS  | 338   | 346  | 9              | HLA-A*02:01 | 338           | 38             | 42570.62242 | 38            | 42570.62242 | 38          | TRUE         | TRUE              |
| 1     | GDSTECANL  | 726   | 734  | 9              | HLA-A*02:01 | 726           | 38             | 42767.11949 | 38            | 42767.11949 | 38          | TRUE         | TRUE              |
| 1     | LVSGETATAG | 859   | 867  | 9              | HLA-A*02:01 | 859           | 38             | 42964.52354 | 38            | 42964.52354 | 38          | TRUE         | TRUE              |
| 1     | TQLNRALSG  | 743   | 751  | 9              | HLA-A*02:01 | 743           | 38             | 43162.83877 | 38            | 43162.83877 | 38          | TRUE         | TRUE              |
| 1     | RDISNVPEFS | 453   | 461  | 9              | HLA-A*02:01 | 453           | 38             | 43462.0293  | 38            | 43462.0293  | 38          | TRUE         | TRUE              |
| 1     | KGDDVRQIA  | 390   | 398  | 9              | HLA-A*02:01 | 390           | 38             | 44066.6463  | 38            | 44066.6463  | 38          | TRUE         | TRUE              |
| 1     | KDGIYFAAT  | 84    | 92   | 9              | HLA-A*02:01 | 84            | 38             | 44066.64633 | 38            | 44066.64633 | 38          | TRUE         | TRUE              |
| 1     | PQAAHPGVV  | 1035  | 1043 | 9              | HLA-A*02:01 | 1035          | 39             | 44885.90645 | 39            | 44885.90645 | 39          | TRUE         | TRUE              |
| 1     | FEYISDAFS  | 161   | 169  | 9              | HLA-A*02:01 | 161           | 39             | 44989.37915 | 39            | 44989.37915 | 39          | TRUE         | TRUE              |
| 1     | GDVVRFPNI  | 311   | 319  | 9              | HLA-A*02:01 | 311           | 39             | 45510.33161 | 39            | 45510.33161 | 39          | TRUE         | TRUE              |
| 1     | NKQSIVIII  | 109   | 117  | 9              | HLA-A*02:01 | 109           | 39             | 45615.24376 | 39            | 45615.24376 | 39          | TRUE         | TRUE              |
| 1     | DFMGCVLAW  | 415   | 423  | 9              | HLA-A*02:01 | 415           | 39             | 46037.31641 | 39            | 46037.31641 | 39          | TRUE         | TRUE              |
| 1     | YTTTIGIGYQ | 484   | 492  | 9              | HLA-A*02:01 | 484           | 39             | 46570.40341 | 39            | 46570.40341 | 39          | TRUE         | TRUE              |
| 1     | IQESLTTTTS | 916   | 924  | 9              | HLA-A*02:01 | 916           | 39             | 46785.36263 | 39            | 46785.36263 | 39          | TRUE         | TRUE              |
| 1     | OSTECANLL  | 727   | 735  | 9              | HLA-A*02:01 | 727           | 39             | 47001.31405 |               |             |             |              |                   |







| seq # | peptide    | start | end  | peptide length | allele      | peptide index | median binding | smm IC50    | smm percentil | legacy IC50 | legacy rank | scores equal | percentiles equal |
|-------|------------|-------|------|----------------|-------------|---------------|----------------|-------------|---------------|-------------|-------------|--------------|-------------------|
| 1     | QCVNFNFNG  | 523   | 531  | 9              | HLA-A*02:01 | 523           | 60             | 270464.3321 | 6.00E+01      | 2.70E+05    | 60          | TRUE         | TRUE              |
| 1     | VVFVNGTSW  | 1076  | 1084 | 9              | HLA-A*02:01 | 1076          | 60             | 270464.3321 | 6.00E+01      | 2.70E+05    | 60          | TRUE         | TRUE              |
| 1     | DKVEAEVQI  | 967   | 975  | 9              | HLA-A*02:01 | 967           | 60             | 271712.7388 | 6.00E+01      | 2.72E+05    | 60          | TRUE         | TRUE              |
| 1     | HVDTSYECD  | 641   | 649  | 9              | HLA-A*02:01 | 641           | 60             | 271712.7388 | 6.00E+01      | 2.72E+05    | 60          | TRUE         | TRUE              |
| 1     | LQELGKYEQ  | 1182  | 1190 | 9              | HLA-A*02:01 | 1182          | 60             | 273596.1615 | 6.00E+01      | 2.74E+05    | 60          | TRUE         | TRUE              |
| 1     | TFMLKYDEN  | 261   | 269  | 9              | HLA-A*02:01 | 261           | 60             | 273596.1615 | 6.00E+01      | 2.74E+05    | 60          | TRUE         | TRUE              |
| 1     | GNFKHLREF  | 177   | 185  | 9              | HLA-A*02:01 | 177           | 61             | 279969.0348 | 6.10E+01      | 2.80E+05    | 61          | TRUE         | TRUE              |
| 1     | NFRALITAF  | 230   | 238  | 9              | HLA-A*02:01 | 230           | 61             | 279969.0348 | 6.10E+01      | 2.80E+05    | 61          | TRUE         | TRUE              |
| 1     | KKISNCVAD  | 343   | 351  | 9              | HLA-A*02:01 | 343           | 61             | 285831.4418 | 6.10E+01      | 2.86E+05    | 61          | TRUE         | TRUE              |
| 1     | AFSPAQDIW  | 237   | 245  | 9              | HLA-A*02:01 | 237           | 61             | 286490.3513 | 6.10E+01      | 2.86E+05    | 61          | TRUE         | TRUE              |
| 1     | PAICHEGKA  | 1061  | 1069 | 9              | HLA-A*02:01 | 1061          | 61             | 287150.7798 | 6.10E+01      | 2.87E+05    | 61          | TRUE         | TRUE              |
| 1     | PTNFSISIT  | 697   | 705  | 9              | HLA-A*02:01 | 697           | 61             | 290475.8291 | 6.10E+01      | 2.90E+05    | 61          | TRUE         | TRUE              |
| 1     | GVSAATKLN  | 368   | 376  | 9              | HLA-A*02:01 | 368           | 61             | 291816.6046 | 6.10E+01      | 2.92E+05    | 61          | TRUE         | TRUE              |
| 1     | YFAATEKSN  | 88    | 96   | 9              | HLA-A*02:01 | 88            | 61             | 291816.6046 | 6.10E+01      | 2.92E+05    | 61          | TRUE         | TRUE              |
| 1     | PFYSNVTGF  | 61    | 69   | 9              | HLA-A*02:01 | 61            | 61             | 294516.7504 | 6.10E+01      | 2.95E+05    | 61          | TRUE         | TRUE              |
| 1     | ELKCSVKSF  | 285   | 293  | 9              | HLA-A*02:01 | 285           | 62             | 297241.8804 | 6.20E+01      | 2.97E+05    | 62          | TRUE         | TRUE              |
| 1     | LAWNTRNID  | 421   | 429  | 9              | HLA-A*02:01 | 421           | 62             | 302071.6724 | 6.20E+01      | 3.02E+05    | 62          | TRUE         | TRUE              |
| 1     | RPFERDISN  | 449   | 457  | 9              | HLA-A*02:01 | 449           | 62             | 306273.9079 | 6.20E+01      | 3.06E+05    | 62          | TRUE         | TRUE              |
| 1     | SGDVVRFPN  | 310   | 318  | 9              | HLA-A*02:01 | 310           | 62             | 306979.9422 | 6.20E+01      | 3.07E+05    | 62          | TRUE         | TRUE              |
| 1     | DVDLGDISG  | 1145  | 1153 | 9              | HLA-A*02:01 | 1145          | 62             | 306979.9422 | 6.20E+01      | 3.07E+05    | 62          | TRUE         | TRUE              |
| 1     | EVFNATKFP  | 327   | 335  | 9              | HLA-A*02:01 | 327           | 62             | 307687.6041 | 6.20E+01      | 3.08E+05    | 62          | TRUE         | TRUE              |
| 1     | NFSQILPDP  | 783   | 791  | 9              | HLA-A*02:01 | 783           | 62             | 307687.6041 | 6.20E+01      | 3.08E+05    | 62          | TRUE         | TRUE              |
| 1     | VAVLYQDVN  | 594   | 602  | 9              | HLA-A*02:01 | 594           | 62             | 309820.3926 | 6.20E+01      | 3.10E+05    | 62          | TRUE         | TRUE              |
| 1     | VEAEVOIDR  | 969   | 977  | 9              | HLA-A*02:01 | 969           | 62             | 312687.1254 | 6.20E+01      | 3.13E+05    | 62          | TRUE         | TRUE              |
| 1     | FERDISNVP  | 451   | 459  | 9              | HLA-A*02:01 | 451           | 62             | 314130.4236 | 6.20E+01      | 3.14E+05    | 62          | TRUE         | TRUE              |
| 1     | LYVYKGYQP  | 194   | 202  | 9              | HLA-A*02:01 | 194           | 62             | 315580.3838 | 6.20E+01      | 3.16E+05    | 62          | TRUE         | TRUE              |
| 1     | GFNTLKPIF  | 212   | 220  | 9              | HLA-A*02:01 | 212           | 63             | 319234.6324 | 6.30E+01      | 3.19E+05    | 63          | TRUE         | TRUE              |
| 1     | SFPQAAPHG  | 1033  | 1041 | 9              | HLA-A*02:01 | 1033          | 63             | 319970.5442 | 6.30E+01      | 3.20E+05    | 63          | TRUE         | TRUE              |
| 1     | GYHLMSFPQ  | 1028  | 1036 | 9              | HLA-A*02:01 | 1028          | 63             | 322188.4741 | 6.30E+01      | 3.22E+05    | 63          | TRUE         | TRUE              |
| 1     | RVDFCGCKY  | 1021  | 1029 | 9              | HLA-A*02:01 | 1021          | 63             | 323675.629  | 6.30E+01      | 3.24E+05    | 63          | TRUE         | TRUE              |
| 1     | GAGAAQIP   | 871   | 879  | 9              | HLA-A*02:01 | 871           | 63             | 324421.7779 | 6.30E+01      | 3.24E+05    | 63          | TRUE         | TRUE              |
| 1     | TSGSDLDRC  | 11    | 19   | 9              | HLA-A*02:01 | 11            | 63             | 324421.7779 | 6.30E+01      | 3.24E+05    | 63          | TRUE         | TRUE              |
| 1     | IQKEIDRLN  | 1161  | 1169 | 9              | HLA-A*02:01 | 1161          | 63             | 330453.2291 | 6.30E+01      | 3.30E+05    | 63          | TRUE         | TRUE              |
| 1     | SDAFSLDVS  | 165   | 173  | 9              | HLA-A*02:01 | 165           | 63             | 331215.0024 | 6.30E+01      | 3.31E+05    | 63          | TRUE         | TRUE              |
| 1     | DEIFRSDTL  | 44    | 52   | 9              | HLA-A*02:01 | 44            | 63             | 331978.5319 | 6.30E+01      | 3.32E+05    | 63          | TRUE         | TRUE              |
| 1     | LHVTVPSPQ  | 1045  | 1053 | 9              | HLA-A*02:01 | 1045          | 63             | 332743.8214 | 6.30E+01      | 3.33E+05    | 63          | TRUE         | TRUE              |
| 1     | FNTLKPIKF  | 213   | 221  | 9              | HLA-A*02:01 | 213           | 63             | 333510.8752 | 6.30E+01      | 3.34E+05    | 63          | TRUE         | TRUE              |
| 1     | DVIGIINN   | 1109  | 1117 | 9              | HLA-A*02:01 | 1109          | 63             | 335050.2914 | 6.30E+01      | 3.35E+05    | 63          | TRUE         | TRUE              |
| 1     | QALNTLVKQ  | 939   | 947  | 9              | HLA-A*02:01 | 939           | 63             | 335822.6621 | 6.30E+01      | 3.36E+05    | 63          | TRUE         | TRUE              |
| 1     | QSVIINNS   | 112   | 120  | 9              | HLA-A*02:01 | 112           | 63             | 338150.4736 | 6.30E+01      | 3.38E+05    | 63          | TRUE         | TRUE              |
| 1     | STALCKLQD  | 924   | 932  | 9              | HLA-A*02:01 | 924           | 63             | 340494.4207 | 6.30E+01      | 3.40E+05    | 63          | TRUE         | TRUE              |
| 1     | NVTGFTHTN  | 65    | 73   | 9              | HLA-A*02:01 | 65            | 63             | 341279.3414 | 6.30E+01      | 3.41E+05    | 63          | TRUE         | TRUE              |
| 1     | CNFECDNP   | 128   | 136  | 9              | HLA-A*02:01 | 128           | 63             | 342066.0715 | 6.30E+01      | 3.42E+05    | 63          | TRUE         | TRUE              |
| 1     | APGOTGVIA  | 398   | 406  | 9              | HLA-A*02:01 | 398           | 63             | 343644.9768 | 6.30E+01      | 3.44E+05    | 63          | TRUE         | TRUE              |
| 1     | IKNQCVNFN  | 520   | 528  | 9              | HLA-A*02:01 | 520           | 63             | 346027.01   | 6.30E+01      | 3.46E+05    | 63          | TRUE         | TRUE              |
| 1     | GNMYKYRY   | 434   | 442  | 9              | HLA-A*02:01 | 434           | 63             | 349228.7585 | 6.30E+01      | 3.49E+05    | 63          | TRUE         | TRUE              |
| 1     | RACNFELCD  | 126   | 134  | 9              | HLA-A*02:01 | 126           | 63             | 350840.7252 | 6.30E+01      | 3.51E+05    | 63          | TRUE         | TRUE              |
| 1     | MSECVLGQS  | 1011  | 1019 | 9              | HLA-A*02:01 | 1011          | 64             | 351649.4966 | 6.40E+01      | 3.52E+05    | 64          | TRUE         | TRUE              |
| 1     | QTSNFRVVP  | 301   | 309  | 9              | HLA-A*02:01 | 301           | 64             | 352460.1324 | 6.40E+01      | 3.52E+05    | 64          | TRUE         | TRUE              |
| 1     | IADYNYKLP  | 405   | 413  | 9              | HLA-A*02:01 | 405           | 64             | 354903.2693 | 6.40E+01      | 3.55E+05    | 64          | TRUE         | TRUE              |
| 1     | SYECDDIPG  | 645   | 653  | 9              | HLA-A*02:01 | 645           | 64             | 355721.4058 | 6.40E+01      | 3.56E+05    | 64          | TRUE         | TRUE              |
| 1     | VRGVVVGST  | 98    | 106  | 9              | HLA-A*02:01 | 98            | 64             | 356541.4284 | 6.40E+01      | 3.57E+05    | 64          | TRUE         | TRUE              |
| 1     | CFSNVYADS  | 378   | 386  | 9              | HLA-A*02:01 | 378           | 64             | 363170.0284 | 6.40E+01      | 3.63E+05    | 64          | TRUE         | TRUE              |
| 1     | LPPLTDDM   | 843   | 851  | 9              | HLA-A*02:01 | 843           | 64             | 364846.3451 | 6.40E+01      | 3.65E+05    | 64          | TRUE         | TRUE              |
| 1     | GPKLSTDLI  | 512   | 520  | 9              | HLA-A*02:01 | 512           | 64             | 373344.7082 | 6.40E+01      | 3.73E+05    | 64          | TRUE         | TRUE              |
| 1     | IWGTSAAY   | 244   | 252  | 9              | HLA-A*02:01 | 244           | 64             | 375932.6101 | 6.40E+01      | 3.76E+05    | 64          | TRUE         | TRUE              |
| 1     | SGNCDVVG   | 1105  | 1113 | 9              | HLA-A*02:01 | 1105          | 65             | 378538.4504 | 6.50E+01      | 3.79E+05    | 65          | TRUE         | TRUE              |
| 1     | GWVVGSTMN  | 100   | 108  | 9              | HLA-A*02:01 | 100           | 65             | 378538.4504 | 6.50E+01      | 3.79E+05    | 65          | TRUE         | TRUE              |
| 1     | EIFRSDTLY  | 45    | 53   | 9              | HLA-A*02:01 | 45            | 65             | 379411.0717 | 6.50E+01      | 3.79E+05    | 65          | TRUE         | TRUE              |
| 1     | LNAPATVCG  | 504   | 512  | 9              | HLA-A*02:01 | 504           | 65             | 382041.0236 | 6.50E+01      | 3.82E+05    | 65          | TRUE         | TRUE              |
| 1     | DINARDLIC  | 825   | 833  | 9              | HLA-A*02:01 | 825           | 65             | 391841.1118 | 6.50E+01      | 3.92E+05    | 65          | TRUE         | TRUE              |
| 1     | SDFTSVVRD  | 556   | 564  | 9              | HLA-A*02:01 | 556           | 65             | 394557.2246 | 6.50E+01      | 3.95E+05    | 65          | TRUE         | TRUE              |
| 1     | EAEVQIDRL  | 970   | 978  | 9              | HLA-A*02:01 | 970           | 65             | 396378.418  | 6.50E+01      | 3.96E+05    | 65          | TRUE         | TRUE              |
| 1     | MKQYGECLG  | 816   | 824  | 9              | HLA-A*02:01 | 816           | 65             | 398208.018  | 6.50E+01      | 3.98E+05    | 65          | TRUE         | TRUE              |
| 1     | RDICAQKF   | 829   | 837  | 9              | HLA-A*02:01 | 829           | 65             | 398208.0176 | 6.50E+01      | 3.98E+05    | 65          | TRUE         | TRUE              |
| 1     | CSCGSCCKF  | 1230  | 1238 | 9              | HLA-A*02:01 | 1230          | 65             | 399125.9819 | 6.50E+01      | 3.99E+05    | 65          | TRUE         | TRUE              |
| 1     | CTQLNRALS  | 742   | 750  | 9              | HLA-A*02:01 | 742           | 65             | 400968.2638 | 6.50E+01      | 4.01E+05    | 65          | TRUE         | TRUE              |
| 1     | YDENGITD   | 266   | 274  | 9              | HLA-A*02:01 | 266           | 65             | 402819.0492 | 6.50E+01      | 4.03E+05    | 65          | TRUE         | TRUE              |
| 1     | GAGICASYH  | 653   | 661  | 9              | HLA-A*02:01 | 653           | 65             | 403747.643  | 6.50E+01      | 4.04E+05    | 65          | TRUE         | TRUE              |
| 1     | KVEAEVQID  | 968   | 976  | 9              | HLA-A*02:01 | 968           | 65             | 406546.2879 | 6.50E+01      | 4.07E+05    | 65          | TRUE         | TRUE              |
| 1     | QTGVADVYN  | 401   | 409  | 9              | HLA-A*02:01 | 401           | 65             | 407483.4739 | 6.50E+01      | 4.07E+05    | 65          | TRUE         | TRUE              |
| 1     | ITTFMLKYDE | 260   | 268  | 9              | HLA-A*02:01 | 260           | 65             | 412201.9102 | 6.50E+01      | 4.12E+05    | 65          | TRUE         | TRUE              |
| 1     | DLQELGKYE  | 1181  | 1189 | 9              | HLA-A*02:01 | 1181          | 66             | 419865.3158 | 6.60E+01      | 4.20E+05    | 66          | TRUE         | TRUE              |
| 1     | KFPSVYAWE  | 333   | 341  | 9              | HLA-A*02:01 | 333           | 66             | 424727.1271 | 6.60E+01      | 4.25E+05    | 66          | TRUE         | TRUE              |
| 1     | LPSPGFNTLK | 209   | 217  | 9              | HLA-A*02:01 | 209           | 66             | 429645.2354 | 6.60E+01      | 4.30E+05    | 66          | TRUE         | TRUE              |
| 1     | CTDVSTAIH  | 603   | 611  | 9              | HLA-A*02:01 | 603           | 66             | 436626.4089 | 6.60E+01      | 4.37E+05    | 66          | TRUE         | TRUE              |
| 1     | ITIGIGQPY  | 486   | 494  | 9              | HLA-A*02:01 | 486           | 66             | 436626.409  | 6.60E+01      | 4.37E+05    | 66          | TRUE         | TRUE              |
| 1     | PFQQFGRDV  | 547   | 555  | 9              | HLA-A*02:01 | 547           | 66             | 437632.9367 | 6.60E+01      | 4.38E+05    | 66          | TRUE         | TRUE              |
| 1     | NFTTAPAC   | 1056  | 1064 | 9              | HLA-A*02:01 | 1056          | 66             | 440666.4633 | 6.60E+01      | 4.41E+05    | 66          | TRUE         | TRUE              |
| 1     | KDGLFLVYK  | 190   | 198  | 9              | HLA-A*02:01 | 190           | 66             | 443721.0173 | 6.60E+01      | 4.44E+05    | 66          | TRUE         | TRUE              |
| 1     | VVRFNPNTN  | 313   | 321  | 9              | HLA-A*02:01 | 313           | 66             | 443721.0173 | 6.60E+01      | 4.44E+05    | 66          | TRUE         | TRUE              |
| 1     | FNGIGVTON  | 888   | 896  | 9              | HLA-A*02:01 | 888           | 66             | 444743.8999 | 6.60E+01      | 4.45E+05    | 66          | TRUE         | TRUE              |
| 1     | GFYTTTGIG  | 482   | 490  | 9              | HLA-A*02:01 | 482           | 66             | 444743.8999 | 6.60E+01      | 4.45E+05    | 66          | TRUE         | TRUE              |
| 1     | RSDTLYLTQ  | 48    | 56   | 9              | HLA-A*02:01 | 48            | 67             | 445769.1405 | 6.70E+01      | 4.46E+05    | 67          | TRUE         | TRUE              |
| 1     | TSPDVLGD   | 1142  | 1150 | 9              | HLA-A*02:01 | 1142          | 67             | 445769.1405 | 6.70E+01      | 4.46E+05    | 67          | TRUE         | TRUE              |
| 1     | QESLTTTST  | 917   | 925  | 9              | HLA-A*02:01 | 917           | 67             | 447826.7173 | 6.70E+01      | 4.48E+05    | 67          | TRUE         | TRUE              |
| 1     | YENQKQIAN  | 899   | 907  | 9              | HLA-A*02:01 | 899           | 67             | 450930.9038 | 6.70E+01      | 4.51E+05    | 67          | TRUE         | TRUE              |
| 1     | PFAMQMAYR  | 879   | 887  | 9              | HLA-A*02:01 | 879           | 67             | 458257.9416 | 6.70E+01      | 4.58E+05    | 67          | TRUE         | TRUE              |
| 1     | AYFPREGVF  | 1069  | 1077 | 9              | HLA-A*02:01 | 1069          | 67             | 460373.1641 | 6.70E+01      | 4.60E+05    | 67          | TRUE         | TRUE              |
| 1     | PDDFMGCVL  | 413   | 421  | 9              | HLA-A*02:01 | 413           | 67             | 465704.0341 | 6.70E+01      | 4.66E+05    | 67          | TRUE         | TRUE              |
| 1     | ERNFTTAPA  | 1054  | 1062 | 9              | HLA-A*02:01 | 1054          | 67             | 467853.6263 | 6.70E+01      | 4.68E+05    | 67          | TRUE         | TRUE              |
| 1     | MYICGDSTE  | 722   | 730  | 9              | HLA-A*02:01 | 722           | 68             | 48          |               |             |             |              |                   |

| seq # | peptide    | start | end  | peptide length | allele      | peptide index | median binding | smm IC50    | smm percentil | legacy IC50 | legacy rank | scores equal | percentiles equal |
|-------|------------|-------|------|----------------|-------------|---------------|----------------|-------------|---------------|-------------|-------------|--------------|-------------------|
| 1     | NSTFFSTFK  | 357   | 365  | 9              | HLA-A*02:01 | 357           | 69             | 523733.0732 | 6.90E+01      | 5.24E+05    | 69          | TRUE         | TRUE              |
| 1     | IDVVRDLPS  | 203   | 211  | 9              | HLA-A*02:01 | 203           | 69             | 524940.4026 | 6.90E+01      | 5.25E+05    | 69          | TRUE         | TRUE              |
| 1     | TAGWTFGAG  | 865   | 873  | 9              | HLA-A*02:01 | 865           | 69             | 526150.5152 | 6.90E+01      | 5.26E+05    | 69          | TRUE         | TRUE              |
| 1     | NARDLICAQ  | 827   | 835  | 9              | HLA-A*02:01 | 827           | 69             | 528579.1156 | 6.90E+01      | 5.29E+05    | 69          | TRUE         | TRUE              |
| 1     | SGTAGAGWT  | 861   | 869  | 9              | HLA-A*02:01 | 861           | 69             | 529797.6163 | 6.90E+01      | 5.30E+05    | 69          | TRUE         | TRUE              |
| 1     | KYEYIKWP   | 1187  | 1195 | 9              | HLA-A*02:01 | 1187          | 69             | 531018.926  | 6.90E+01      | 5.31E+05    | 69          | TRUE         | TRUE              |
| 1     | GKAYFPREG  | 1067  | 1075 | 9              | HLA-A*02:01 | 1067          | 69             | 532243.051  | 6.90E+01      | 5.32E+05    | 69          | TRUE         | TRUE              |
| 1     | HEGKAYFPR  | 1065  | 1073 | 9              | HLA-A*02:01 | 1065          | 69             | 535932.3836 | 6.90E+01      | 5.36E+05    | 69          | TRUE         | TRUE              |
| 1     | TSQKSIWAY  | 669   | 677  | 9              | HLA-A*02:01 | 669           | 69             | 535932.3836 | 6.90E+01      | 5.36E+05    | 69          | TRUE         | TRUE              |
| 1     | NVVPSPDGK  | 457   | 465  | 9              | HLA-A*02:01 | 457           | 69             | 543387.946  | 6.90E+01      | 5.43E+05    | 69          | TRUE         | TRUE              |
| 1     | WNTRNIDAT  | 423   | 431  | 9              | HLA-A*02:01 | 423           | 69             | 543387.9457 | 6.90E+01      | 5.43E+05    | 69          | TRUE         | TRUE              |
| 1     | AGFMKQYGE  | 813   | 821  | 9              | HLA-A*02:01 | 813           | 69             | 545896.1105 | 6.90E+01      | 5.46E+05    | 69          | TRUE         | TRUE              |
| 1     | EHVDTSYEC  | 640   | 648  | 9              | HLA-A*02:01 | 640           | 69             | 545896.1105 | 6.90E+01      | 5.46E+05    | 69          | TRUE         | TRUE              |
| 1     | AWRIYSTGN  | 618   | 626  | 9              | HLA-A*02:01 | 618           | 69             | 550947.225  | 6.90E+01      | 5.51E+05    | 69          | TRUE         | TRUE              |
| 1     | LNRALSGIA  | 745   | 753  | 9              | HLA-A*02:01 | 745           | 69             | 550947.225  | 6.90E+01      | 5.51E+05    | 69          | TRUE         | TRUE              |
| 1     | KHLREFVFK  | 180   | 188  | 9              | HLA-A*02:01 | 180           | 69             | 554766.2088 | 6.90E+01      | 5.55E+05    | 69          | TRUE         | TRUE              |
| 1     | YGVVSATLKN | 367   | 375  | 9              | HLA-A*02:01 | 367           | 69             | 554766.2088 | 6.90E+01      | 5.55E+05    | 69          | TRUE         | TRUE              |
| 1     | APNYTQHTS  | 27    | 35   | 9              | HLA-A*02:01 | 27            | 69             | 556045.077  | 6.90E+01      | 5.56E+05    | 69          | TRUE         | TRUE              |
| 1     | LCCMTSCCS  | 1216  | 1224 | 9              | HLA-A*02:01 | 1216          | 69             | 561190.0987 | 6.90E+01      | 5.61E+05    | 69          | TRUE         | TRUE              |
| 1     | NVLYENQKQ  | 896   | 904  | 9              | HLA-A*02:01 | 896           | 69             | 563780.435  | 6.90E+01      | 5.64E+05    | 69          | TRUE         | TRUE              |
| 1     | LKPPTFMK   | 257   | 265  | 9              | HLA-A*02:01 | 257           | 70             | 571623.402  | 7.00E+01      | 5.72E+05    | 70          | TRUE         | TRUE              |
| 1     | SPDGKPCPT  | 461   | 469  | 9              | HLA-A*02:01 | 461           | 70             | 571623.402  | 7.00E+01      | 5.72E+05    | 70          | TRUE         | TRUE              |
| 1     | RDVSDFTDS  | 553   | 561  | 9              | HLA-A*02:01 | 553           | 70             | 582250.6741 | 7.00E+01      | 5.82E+05    | 70          | TRUE         | TRUE              |
| 1     | SDTLVLTQD  | 49    | 57   | 9              | HLA-A*02:01 | 49            | 70             | 583592.9005 | 7.00E+01      | 5.84E+05    | 70          | TRUE         | TRUE              |
| 1     | TSCCSCCLKG | 1220  | 1228 | 9              | HLA-A*02:01 | 1220          | 70             | 583592.9005 | 7.00E+01      | 5.84E+05    | 70          | TRUE         | TRUE              |
| 1     | VSLLRSTSQ  | 663   | 671  | 9              | HLA-A*02:01 | 663           | 70             | 584938.2211 | 7.00E+01      | 5.85E+05    | 70          | TRUE         | TRUE              |
| 1     | GYQPIDVVR  | 199   | 207  | 9              | HLA-A*02:01 | 199           | 70             | 586286.6429 | 7.00E+01      | 5.86E+05    | 70          | TRUE         | TRUE              |
| 1     | ISNVFPSPD  | 455   | 463  | 9              | HLA-A*02:01 | 455           | 70             | 590350.5878 | 7.00E+01      | 5.90E+05    | 70          | TRUE         | TRUE              |
| 1     | NQKQIANQF  | 901   | 909  | 9              | HLA-A*02:01 | 901           | 70             | 604101.619  | 7.00E+01      | 6.04E+05    | 70          | TRUE         | TRUE              |
| 1     | VIPFKDGIY  | 80    | 88   | 9              | HLA-A*02:01 | 80            | 70             | 608289.0519 | 7.00E+01      | 6.08E+05    | 70          | TRUE         | TRUE              |
| 1     | VDCNMVYICG | 718   | 726  | 9              | HLA-A*02:01 | 718           | 71             | 611096.787  | 7.10E+01      | 6.11E+05    | 71          | TRUE         | TRUE              |
| 1     | GFLYVYKYG  | 192   | 200  | 9              | HLA-A*02:01 | 192           | 71             | 623892.8378 | 7.10E+01      | 6.24E+05    | 71          | TRUE         | TRUE              |
| 1     | SGINASVVN  | 1152  | 1160 | 9              | HLA-A*02:01 | 1152          | 71             | 625331.0593 | 7.10E+01      | 6.25E+05    | 71          | TRUE         | TRUE              |
| 1     | ATEKSNVVR  | 91    | 99   | 9              | HLA-A*02:01 | 91            | 71             | 629665.647  | 7.10E+01      | 6.30E+05    | 71          | TRUE         | TRUE              |
| 1     | TFFSTFKCY  | 359   | 367  | 9              | HLA-A*02:01 | 359           | 71             | 631117.1763 | 7.10E+01      | 6.31E+05    | 71          | TRUE         | TRUE              |
| 1     | EKSGNFKHL  | 174   | 182  | 9              | HLA-A*02:01 | 174           | 71             | 634030.2809 | 7.10E+01      | 6.34E+05    | 71          | TRUE         | TRUE              |
| 1     | GSCCKFDED  | 1233  | 1241 | 9              | HLA-A*02:01 | 1233          | 71             | 642850.5207 | 7.10E+01      | 6.43E+05    | 71          | TRUE         | TRUE              |
| 1     | KPTTFMLKY  | 258   | 266  | 9              | HLA-A*02:01 | 258           | 71             | 644332.4442 | 7.10E+01      | 6.44E+05    | 71          | TRUE         | TRUE              |
| 1     | SVKSFEEKD  | 289   | 297  | 9              | HLA-A*02:01 | 289           | 71             | 647306.5476 | 7.10E+01      | 6.47E+05    | 71          | TRUE         | TRUE              |
| 1     | FGEVFNATK  | 325   | 333  | 9              | HLA-A*02:01 | 325           | 71             | 650294.3789 | 7.10E+01      | 6.50E+05    | 71          | TRUE         | TRUE              |
| 1     | PKTSEILDI  | 565   | 573  | 9              | HLA-A*02:01 | 565           | 71             | 650294.3789 | 7.10E+01      | 6.50E+05    | 71          | TRUE         | TRUE              |
| 1     | YDPLQPELD  | 1120  | 1128 | 9              | HLA-A*02:01 | 1120          | 71             | 650294.3789 | 7.10E+01      | 6.50E+05    | 71          | TRUE         | TRUE              |
| 1     | DAVDCSQNP  | 274   | 282  | 9              | HLA-A*02:01 | 274           | 71             | 654802.0042 | 7.10E+01      | 6.55E+05    | 71          | TRUE         | TRUE              |
| 1     | EVQIDRLIT  | 972   | 980  | 9              | HLA-A*02:01 | 972           | 71             | 659340.875  | 7.10E+01      | 6.59E+05    | 71          | TRUE         | TRUE              |
| 1     | WPLNDYGFY  | 476   | 484  | 9              | HLA-A*02:01 | 476           | 72             | 670054.3022 | 7.20E+01      | 6.70E+05    | 72          | TRUE         | TRUE              |
| 1     | SNVPFSPDG  | 456   | 464  | 9              | HLA-A*02:01 | 456           | 72             | 674698.8967 | 7.20E+01      | 6.75E+05    | 72          | TRUE         | TRUE              |
| 1     | IGVTQNLVY  | 891   | 899  | 9              | HLA-A*02:01 | 891           | 72             | 674698.8967 | 7.20E+01      | 6.75E+05    | 72          | TRUE         | TRUE              |
| 1     | DRCTTFDDV  | 17    | 25   | 9              | HLA-A*02:01 | 17            | 72             | 679375.6861 | 7.20E+01      | 6.79E+05    | 72          | TRUE         | TRUE              |
| 1     | TQNVLVENQ  | 894   | 902  | 9              | HLA-A*02:01 | 894           | 72             | 680941.8088 | 7.20E+01      | 6.81E+05    | 72          | TRUE         | TRUE              |
| 1     | AVSKPMGTQ  | 139   | 147  | 9              | HLA-A*02:01 | 139           | 72             | 684084.8933 | 7.20E+01      | 6.84E+05    | 72          | TRUE         | TRUE              |
| 1     | NNKSQSVII  | 108   | 116  | 9              | HLA-A*02:01 | 108           | 72             | 684084.8933 | 7.20E+01      | 6.84E+05    | 72          | TRUE         | TRUE              |
| 1     | DENGITIDA  | 267   | 275  | 9              | HLA-A*02:01 | 267           | 72             | 695200.3787 | 7.20E+01      | 6.95E+05    | 72          | TRUE         | TRUE              |
| 1     | LNCYWPLND  | 472   | 480  | 9              | HLA-A*02:01 | 472           | 72             | 708125.1187 | 7.20E+01      | 7.08E+05    | 72          | TRUE         | TRUE              |
| 1     | ATKLNDLCF  | 371   | 379  | 9              | HLA-A*02:01 | 371           | 72             | 708125.1187 | 7.20E+01      | 7.08E+05    | 72          | TRUE         | TRUE              |
| 1     | VSDFTDSVR  | 555   | 563  | 9              | HLA-A*02:01 | 555           | 72             | 709757.5157 | 7.20E+01      | 7.10E+05    | 72          | TRUE         | TRUE              |
| 1     | NTFVSGNCD  | 1101  | 1109 | 9              | HLA-A*02:01 | 1101          | 72             | 726289.892  | 7.20E+01      | 7.26E+05    | 72          | TRUE         | TRUE              |
| 1     | MAKTSVDCN  | 713   | 721  | 9              | HLA-A*02:01 | 713           | 73             | 736393.5909 | 7.30E+01      | 7.36E+05    | 73          | TRUE         | TRUE              |
| 1     | IRAAEIRAS  | 995   | 1003 | 9              | HLA-A*02:01 | 995           | 73             | 746637.8462 | 7.30E+01      | 7.47E+05    | 73          | TRUE         | TRUE              |
| 1     | NDLCSFNVY  | 375   | 383  | 9              | HLA-A*02:01 | 375           | 73             | 746637.8462 | 7.30E+01      | 7.47E+05    | 73          | TRUE         | TRUE              |
| 1     | NPFFFAVSKP | 135   | 143  | 9              | HLA-A*02:01 | 135           | 73             | 751813.2925 | 7.30E+01      | 7.52E+05    | 73          | TRUE         | TRUE              |
| 1     | PPLLTDDMI  | 844   | 852  | 9              | HLA-A*02:01 | 844           | 73             | 755283.5049 | 7.30E+01      | 7.55E+05    | 73          | TRUE         | TRUE              |
| 1     | KRVDFCGKG  | 1020  | 1028 | 9              | HLA-A*02:01 | 1020          | 73             | 762272.0572 | 7.30E+01      | 7.62E+05    | 73          | TRUE         | TRUE              |
| 1     | NGTSWFITQ  | 1080  | 1088 | 9              | HLA-A*02:01 | 1080          | 73             | 776443.7528 | 7.30E+01      | 7.76E+05    | 73          | TRUE         | TRUE              |
| 1     | NFNGLTGTG  | 528   | 536  | 9              | HLA-A*02:01 | 528           | 73             | 778233.6405 | 7.30E+01      | 7.78E+05    | 73          | TRUE         | TRUE              |
| 1     | KRFQPFQKF  | 543   | 551  | 9              | HLA-A*02:01 | 543           | 74             | 781825.8038 | 7.40E+01      | 7.82E+05    | 74          | TRUE         | TRUE              |
| 1     | ADQLTPAWR  | 612   | 620  | 9              | HLA-A*02:01 | 612           | 74             | 794529.4511 | 7.40E+01      | 7.95E+05    | 74          | TRUE         | TRUE              |
| 1     | VSKPMGTQT  | 140   | 148  | 9              | HLA-A*02:01 | 140           | 74             | 796361.0307 | 7.40E+01      | 7.96E+05    | 74          | TRUE         | TRUE              |
| 1     | VPSQERNFT  | 1050  | 1058 | 9              | HLA-A*02:01 | 1050          | 74             | 800036.8662 | 7.40E+01      | 8.00E+05    | 74          | TRUE         | TRUE              |
| 1     | CNMVYICGS  | 720   | 728  | 9              | HLA-A*02:01 | 720           | 74             | 814910.662  | 7.40E+01      | 8.15E+05    | 74          | TRUE         | TRUE              |
| 1     | IGIINNTVY  | 1112  | 1120 | 9              | HLA-A*02:01 | 1112          | 74             | 828151.895  | 7.40E+01      | 8.28E+05    | 74          | TRUE         | TRUE              |
| 1     | TSSMRGVVY  | 34    | 42   | 9              | HLA-A*02:01 | 34            | 74             | 830060.9824 | 7.40E+01      | 8.30E+05    | 74          | TRUE         | TRUE              |
| 1     | APATVCGPK  | 506   | 514  | 9              | HLA-A*02:01 | 506           | 74             | 835814.6902 | 7.40E+01      | 8.36E+05    | 74          | TRUE         | TRUE              |
| 1     | PIDVVRDLP  | 202   | 210  | 9              | HLA-A*02:01 | 202           | 74             | 837741.4421 | 7.40E+01      | 8.38E+05    | 74          | TRUE         | TRUE              |
| 1     | LCPFGEVFN  | 322   | 330  | 9              | HLA-A*02:01 | 322           | 74             | 845492.9682 | 7.40E+01      | 8.45E+05    | 74          | TRUE         | TRUE              |
| 1     | VFGSTMNNK  | 102   | 110  | 9              | HLA-A*02:01 | 102           | 74             | 845492.9682 | 7.40E+01      | 8.45E+05    | 74          | TRUE         | TRUE              |
| 1     | LSTDLIKQK  | 515   | 523  | 9              | HLA-A*02:01 | 515           | 74             | 845492.9682 | 7.40E+01      | 8.45E+05    | 74          | TRUE         | TRUE              |
| 1     | NATKFPSPVY | 330   | 338  | 9              | HLA-A*02:01 | 330           | 75             | 853316.218  | 7.50E+01      | 8.53E+05    | 75          | TRUE         | TRUE              |
| 1     | VYKGYQPID  | 196   | 204  | 9              | HLA-A*02:01 | 196           | 75             | 855283.3153 | 7.50E+01      | 8.55E+05    | 75          | TRUE         | TRUE              |
| 1     | TRNIDATST  | 425   | 433  | 9              | HLA-A*02:01 | 425           | 75             | 859231.1238 | 7.50E+01      | 8.59E+05    | 75          | TRUE         | TRUE              |
| 1     | VKQLSSNFG  | 945   | 953  | 9              | HLA-A*02:01 | 945           | 75             | 867181.4915 | 7.50E+01      | 8.67E+05    | 75          | TRUE         | TRUE              |
| 1     | TFEYISDAF  | 160   | 168  | 9              | HLA-A*02:01 | 160           | 75             | 871184.2194 | 7.50E+01      | 8.71E+05    | 75          | TRUE         | TRUE              |
| 1     | VFAQVQKMY  | 763   | 771  | 9              | HLA-A*02:01 | 763           | 75             | 877222.98   | 7.50E+01      | 8.77E+05    | 75          | TRUE         | TRUE              |
| 1     | LPDPLKPTK  | 788   | 796  | 9              | HLA-A*02:01 | 788           | 75             | 881272.0572 | 7.50E+01      | 8.81E+05    | 75          | TRUE         | TRUE              |
| 1     | TFGAGAAALQ | 869   | 877  | 9              | HLA-A*02:01 | 869           | 75             | 883303.5991 | 7.50E+01      | 8.83E+05    | 75          | TRUE         | TRUE              |
| 1     | LRHGKLRPF  | 443   | 451  | 9              | HLA-A*02:01 | 443           | 75             | 895591.5762 | 7.50E+01      | 8.96E+05    | 75          | TRUE         | TRUE              |
| 1     | MPVSMAKTS  | 709   | 717  | 9              | HLA-A*02:01 | 709           | 75             | 895591.5762 | 7.50E+01      | 8.96E+05    | 75          | TRUE         | TRUE              |
| 1     | TDNTFVSGN  | 1099  | 1107 | 9              | HLA-A*02:01 | 1099          | 75             | 901799.52   | 7.50E+01      | 9.02E+05    | 75          | TRUE         | TRUE              |
| 1     | DYSVLNST   | 351   | 359  | 9              | HLA-A*02:01 | 351           | 75             | 905962.0379 | 7.50E+01      | 9.06E+05    | 75          | TRUE         | TRUE              |
| 1     | PNITNLCPF  | 317   | 325  | 9              | HLA-A*02:01 | 317           | 75             | 908050.496  | 7.50E+01      | 9.08E+05    | 75          | TRUE         | TRUE              |
| 1     | HVTYVPSQE  | 1046  | 1054 | 9              | HLA-A*02:01 | 1046          | 75             | 910143.7686 | 7.50E+01      | 9.10E+05    | 75          | TRUE         | TRUE              |
| 1     | TDSVRDPKT  | 559   | 567  | 9              | HLA-A*02:01 | 559           | 75             | 910143.7686 | 7.50E+01      | 9.10E+05    | 75          | TRUE         | TRUE              |
| 1     | SNVVRGWVF  | 95    | 103  | 9              | HLA-A*02:01 | 95            | 75             | 914344.8014 |               |             |             |              |                   |

| seq # | peptide   | start | end  | peptide length | allele      | peptide index | median binding | smm IC50    | smm percentil | legacy IC50 | legacy rank | scores equal | percentiles equal |
|-------|-----------|-------|------|----------------|-------------|---------------|----------------|-------------|---------------|-------------|-------------|--------------|-------------------|
| 1     | KNLNESLID | 1173  | 1181 | 9              | HLA-A*02:01 | 1173          | 76             | 959643.6635 | 7.60E+01      | 9.60E+05    | 76          | TRUE         | TRUE              |
| 1     | NHTSPDVL  | 1140  | 1148 | 9              | HLA-A*02:01 | 1140          | 76             | 975236.6186 | 7.60E+01      | 9.75E+05    | 76          | TRUE         | TRUE              |
| 1     | NFELCDNPF | 129   | 137  | 9              | HLA-A*02:01 | 129           | 76             | 997952.798  | 7.60E+01      | 9.98E+05    | 76          | TRUE         | TRUE              |
| 1     | PSGDVVRFP | 309   | 317  | 9              | HLA-A*02:01 | 309           | 76             | 1002559.138 | 7.60E+01      | 1.00E+06    | 76          | TRUE         | TRUE              |
| 1     | EGVVFVNGT | 1074  | 1082 | 9              | HLA-A*02:01 | 1074          | 76             | 1016506.125 | 7.60E+01      | 1.02E+06    | 76          | TRUE         | TRUE              |
| 1     | DIPIGAGIC | 649   | 657  | 9              | HLA-A*02:01 | 649           | 76             | 1023552.209 | 7.60E+01      | 1.02E+06    | 76          | TRUE         | TRUE              |
| 1     | PAQDIWGT  | 240   | 248  | 9              | HLA-A*02:01 | 240           | 77             | 1037791.239 | 7.70E+01      | 1.04E+06    | 77          | TRUE         | TRUE              |
| 1     | PLKPTKRFS | 791   | 799  | 9              | HLA-A*02:01 | 791           | 77             | 1044984.864 | 7.70E+01      | 1.04E+06    | 77          | TRUE         | TRUE              |
| 1     | TYVTQQLR  | 988   | 996  | 9              | HLA-A*02:01 | 988           | 77             | 1059522.052 | 7.70E+01      | 1.06E+06    | 77          | TRUE         | TRUE              |
| 1     | PVLKGVLKH | 1245  | 1253 | 9              | HLA-A*02:01 | 1245          | 77             | 1066866.308 | 7.70E+01      | 1.07E+06    | 77          | TRUE         | TRUE              |
| 1     | TPTLKYFGG | 773   | 781  | 9              | HLA-A*02:01 | 773           | 77             | 1101818.348 | 7.70E+01      | 1.10E+06    | 77          | TRUE         | TRUE              |
| 1     | INASVVNIQ | 1154  | 1162 | 9              | HLA-A*02:01 | 1154          | 77             | 1101818.348 | 7.70E+01      | 1.10E+06    | 77          | TRUE         | TRUE              |
| 1     | VVKGDVVRQ | 388   | 396  | 9              | HLA-A*02:01 | 388           | 78             | 1124889.855 | 7.80E+01      | 1.12E+06    | 78          | TRUE         | TRUE              |
| 1     | LTPSSKRFP | 538   | 546  | 9              | HLA-A*02:01 | 538           | 78             | 1130082.111 | 7.80E+01      | 1.13E+06    | 78          | TRUE         | TRUE              |
| 1     | TSTGNYNYK | 431   | 439  | 9              | HLA-A*02:01 | 431           | 78             | 1143167.845 | 7.80E+01      | 1.14E+06    | 78          | TRUE         | TRUE              |
| 1     | VKSFEIDKG | 290   | 298  | 9              | HLA-A*02:01 | 290           | 78             | 1145803.119 | 7.80E+01      | 1.15E+06    | 78          | TRUE         | TRUE              |
| 1     | ADAGFMKQY | 811   | 819  | 9              | HLA-A*02:01 | 811           | 78             | 1151091.906 | 7.80E+01      | 1.15E+06    | 78          | TRUE         | TRUE              |
| 1     | DYGFYTTTG | 480   | 488  | 9              | HLA-A*02:01 | 480           | 78             | 1164420.922 | 7.80E+01      | 1.16E+06    | 78          | TRUE         | TRUE              |
| 1     | DRNTRVFA  | 757   | 765  | 9              | HLA-A*02:01 | 757           | 78             | 1164420.922 | 7.80E+01      | 1.16E+06    | 78          | TRUE         | TRUE              |
| 1     | VDFCGKYH  | 1022  | 1030 | 9              | HLA-A*02:01 | 1022          | 78             | 1175195.176 | 7.80E+01      | 1.18E+06    | 78          | TRUE         | TRUE              |
| 1     | TQQLURAAE | 991   | 999  | 9              | HLA-A*02:01 | 991           | 78             | 1180619.63  | 7.80E+01      | 1.18E+06    | 78          | TRUE         | TRUE              |
| 1     | QFGRDVSD  | 550   | 558  | 9              | HLA-A*02:01 | 550           | 78             | 1183341.24  | 7.80E+01      | 1.18E+06    | 78          | TRUE         | TRUE              |
| 1     | AYTMSIGAD | 676   | 684  | 9              | HLA-A*02:01 | 676           | 78             | 1194290.561 | 7.80E+01      | 1.19E+06    | 78          | TRUE         | TRUE              |
| 1     | DDVQAPNYT | 23    | 31   | 9              | HLA-A*02:01 | 23            | 78             | 1194290.561 | 7.80E+01      | 1.19E+06    | 78          | TRUE         | TRUE              |
| 1     | NFNFNGLTG | 526   | 534  | 9              | HLA-A*02:01 | 526           | 78             | 1197043.685 | 7.80E+01      | 1.20E+06    | 78          | TRUE         | TRUE              |
| 1     | QSLQTYVTQ | 984   | 992  | 9              | HLA-A*02:01 | 984           | 78             | 1199803.156 | 7.80E+01      | 1.20E+06    | 78          | TRUE         | TRUE              |
| 1     | GNPVPFKD  | 77    | 85   | 9              | HLA-A*02:01 | 77            | 78             | 1208119.794 | 7.80E+01      | 1.21E+06    | 78          | TRUE         | TRUE              |
| 1     | VCGPKLSTD | 510   | 518  | 9              | HLA-A*02:01 | 510           | 78             | 1216494.081 | 7.80E+01      | 1.22E+06    | 78          | TRUE         | TRUE              |
| 1     | GAEHVDTSY | 638   | 646  | 9              | HLA-A*02:01 | 638           | 79             | 1288575.886 | 7.90E+01      | 1.29E+06    | 79          | TRUE         | TRUE              |
| 1     | ERKKSNCV  | 341   | 349  | 9              | HLA-A*02:01 | 341           | 79             | 1306501.763 | 7.90E+01      | 1.31E+06    | 79          | TRUE         | TRUE              |
| 1     | GEVFNATKF | 326   | 334  | 9              | HLA-A*02:01 | 326           | 79             | 1358657.53  | 7.90E+01      | 1.36E+06    | 79          | TRUE         | TRUE              |
| 1     | EELDKYFKN | 1132  | 1140 | 9              | HLA-A*02:01 | 1132          | 80             | 1383916.859 | 8.00E+01      | 1.38E+06    | 80          | TRUE         | TRUE              |
| 1     | SRLDKVEAE | 964   | 972  | 9              | HLA-A*02:01 | 964           | 80             | 1406403.699 | 8.00E+01      | 1.41E+06    | 80          | TRUE         | TRUE              |
| 1     | PPALNCYWP | 469   | 477  | 9              | HLA-A*02:01 | 469           | 80             | 1422689.086 | 8.00E+01      | 1.42E+06    | 80          | TRUE         | TRUE              |
| 1     | NPLAELKCS | 281   | 289  | 9              | HLA-A*02:01 | 281           | 80             | 1452479.461 | 8.00E+01      | 1.45E+06    | 80          | TRUE         | TRUE              |
| 1     | EPVLKGVKL | 1244  | 1252 | 9              | HLA-A*02:01 | 1244          | 80             | 1462547.568 | 8.00E+01      | 1.46E+06    | 80          | TRUE         | TRUE              |
| 1     | LDKYFKNHT | 1134  | 1142 | 9              | HLA-A*02:01 | 1134          | 80             | 1465919.088 | 8.00E+01      | 1.47E+06    | 80          | TRUE         | TRUE              |
| 1     | SCGSCCKFD | 1231  | 1239 | 9              | HLA-A*02:01 | 1231          | 80             | 1472685.463 | 8.00E+01      | 1.47E+06    | 80          | TRUE         | TRUE              |
| 1     | DKYFKNHTS | 1135  | 1143 | 9              | HLA-A*02:01 | 1135          | 80             | 1486312.054 | 8.00E+01      | 1.49E+06    | 80          | TRUE         | TRUE              |
| 1     | GRDVSDFD  | 552   | 560  | 9              | HLA-A*02:01 | 552           | 81             | 1524438.821 | 8.10E+01      | 1.52E+06    | 81          | TRUE         | TRUE              |
| 1     | SFKEELDKY | 1129  | 1137 | 9              | HLA-A*02:01 | 1129          | 81             | 1531475.311 | 8.10E+01      | 1.53E+06    | 81          | TRUE         | TRUE              |
| 1     | SSKRFPQFP | 541   | 549  | 9              | HLA-A*02:01 | 541           | 81             | 1531475.311 | 8.10E+01      | 1.53E+06    | 81          | TRUE         | TRUE              |
| 1     | KPCTPPALN | 465   | 473  | 9              | HLA-A*02:01 | 465           | 81             | 1538544.28  | 8.10E+01      | 1.54E+06    | 81          | TRUE         | TRUE              |
| 1     | NFSISITTE | 699   | 707  | 9              | HLA-A*02:01 | 699           | 81             | 1538544.28  | 8.10E+01      | 1.54E+06    | 81          | TRUE         | TRUE              |
| 1     | CSVKSFEID | 288   | 296  | 9              | HLA-A*02:01 | 288           | 81             | 1552780.255 | 8.10E+01      | 1.55E+06    | 81          | TRUE         | TRUE              |
| 1     | PSSKRFPQF | 540   | 548  | 9              | HLA-A*02:01 | 540           | 81             | 1563543.614 | 8.10E+01      | 1.56E+06    | 81          | TRUE         | TRUE              |
| 1     | CSCLKGACS | 1223  | 1231 | 9              | HLA-A*02:01 | 1223          | 81             | 1567147.954 | 8.10E+01      | 1.57E+06    | 81          | TRUE         | TRUE              |
| 1     | GRLOSLQTY | 981   | 989  | 9              | HLA-A*02:01 | 981           | 81             | 1567147.954 | 8.10E+01      | 1.57E+06    | 81          | TRUE         | TRUE              |
| 1     | TPSSKRFPQ | 539   | 547  | 9              | HLA-A*02:01 | 539           | 81             | 1585294.672 | 8.10E+01      | 1.59E+06    | 81          | TRUE         | TRUE              |
| 1     | IDLQELGKY | 1180  | 1188 | 9              | HLA-A*02:01 | 1180          | 81             | 1592612.06  | 8.10E+01      | 1.59E+06    | 81          | TRUE         | TRUE              |
| 1     | NYKLPPDFM | 409   | 417  | 9              | HLA-A*02:01 | 409           | 81             | 1603651.519 | 8.10E+01      | 1.60E+06    | 81          | TRUE         | TRUE              |
| 1     | TSEILDISP | 567   | 575  | 9              | HLA-A*02:01 | 567           | 81             | 1633465.627 | 8.10E+01      | 1.63E+06    | 81          | TRUE         | TRUE              |
| 1     | RYLRHGLKL | 441   | 449  | 9              | HLA-A*02:01 | 441           | 81             | 1644788.27  | 8.10E+01      | 1.64E+06    | 81          | TRUE         | TRUE              |
| 1     | ECLGDINAR | 821   | 829  | 9              | HLA-A*02:01 | 821           | 82             | 1660007.308 | 8.20E+01      | 1.66E+06    | 82          | TRUE         | TRUE              |
| 1     | TECANLLQ  | 729   | 737  | 9              | HLA-A*02:01 | 729           | 82             | 1671513.929 | 8.20E+01      | 1.67E+06    | 82          | TRUE         | TRUE              |
| 1     | ARDLICAQK | 828   | 836  | 9              | HLA-A*02:01 | 828           | 82             | 1710448.49  | 8.20E+01      | 1.71E+06    | 82          | TRUE         | TRUE              |
| 1     | CHEGKAYFP | 1064  | 1072 | 9              | HLA-A*02:01 | 1064          | 82             | 1710448.49  | 8.20E+01      | 1.71E+06    | 82          | TRUE         | TRUE              |
| 1     | IDATSTGNY | 428   | 436  | 9              | HLA-A*02:01 | 428           | 82             | 1718343.562 | 8.20E+01      | 1.72E+06    | 82          | TRUE         | TRUE              |
| 1     | ADSFVVKGD | 384   | 392  | 9              | HLA-A*02:01 | 384           | 82             | 1742248.102 | 8.20E+01      | 1.74E+06    | 82          | TRUE         | TRUE              |
| 1     | TGVIADYNY | 402   | 410  | 9              | HLA-A*02:01 | 402           | 82             | 1774638.912 | 8.20E+01      | 1.77E+06    | 82          | TRUE         | TRUE              |
| 1     | VNQNAQALN | 934   | 942  | 9              | HLA-A*02:01 | 934           | 83             | 1791059.444 | 8.30E+01      | 1.79E+06    | 83          | TRUE         | TRUE              |
| 1     | CGKGYHMLS | 1025  | 1033 | 9              | HLA-A*02:01 | 1025          | 83             | 1807631.913 | 8.30E+01      | 1.81E+06    | 83          | TRUE         | TRUE              |
| 1     | DAFSLDVSE | 166   | 174  | 9              | HLA-A*02:01 | 166           | 83             | 1837003.569 | 8.30E+01      | 1.84E+06    | 83          | TRUE         | TRUE              |
| 1     | LDRCITFD  | 16    | 24   | 9              | HLA-A*02:01 | 16            | 83             | 1849737.069 | 8.30E+01      | 1.85E+06    | 83          | TRUE         | TRUE              |
| 1     | DCNMVYICD | 719   | 727  | 9              | HLA-A*02:01 | 719           | 83             | 1854001.153 | 8.30E+01      | 1.85E+06    | 83          | TRUE         | TRUE              |
| 1     | WERKKISNC | 340   | 348  | 9              | HLA-A*02:01 | 340           | 83             | 1871156.015 | 8.30E+01      | 1.87E+06    | 83          | TRUE         | TRUE              |
| 1     | VSVITPGTN | 581   | 589  | 9              | HLA-A*02:01 | 581           | 83             | 1871156.015 | 8.30E+01      | 1.87E+06    | 83          | TRUE         | TRUE              |
| 1     | QSKRVDFCG | 1018  | 1026 | 9              | HLA-A*02:01 | 1018          | 83             | 1875469.475 | 8.30E+01      | 1.88E+06    | 83          | TRUE         | TRUE              |
| 1     | SVRDPKTSE | 561   | 569  | 9              | HLA-A*02:01 | 561           | 83             | 1901559.854 | 8.30E+01      | 1.90E+06    | 83          | TRUE         | TRUE              |
| 1     | IDKGYQYTS | 295   | 303  | 9              | HLA-A*02:01 | 295           | 83             | 1936912.491 | 8.30E+01      | 1.94E+06    | 83          | TRUE         | TRUE              |
| 1     | INKVTLDAG | 806   | 814  | 9              | HLA-A*02:01 | 806           | 83             | 1945852.873 | 8.30E+01      | 1.95E+06    | 83          | TRUE         | TRUE              |
| 1     | NNSTNVVIR | 118   | 126  | 9              | HLA-A*02:01 | 118           | 83             | 1954834.522 | 8.30E+01      | 1.95E+06    | 83          | TRUE         | TRUE              |
| 1     | LNILSLRLD | 959   | 967  | 9              | HLA-A*02:01 | 959           | 84             | 2009601.749 | 8.40E+01      | 2.01E+06    | 84          | TRUE         | TRUE              |
| 1     | OAGCLIGAE | 632   | 640  | 9              | HLA-A*02:01 | 632           | 84             | 2014234.359 | 8.40E+01      | 2.01E+06    | 84          | TRUE         | TRUE              |
| 1     | RNTRVFAQ  | 758   | 766  | 9              | HLA-A*02:01 | 758           | 84             | 2018877.649 | 8.40E+01      | 2.02E+06    | 84          | TRUE         | TRUE              |
| 1     | CCSLKGKAC | 1222  | 1230 | 9              | HLA-A*02:01 | 1222          | 84             | 2032871.84  | 8.40E+01      | 2.03E+06    | 84          | TRUE         | TRUE              |
| 1     | CGDSTECAN | 725   | 733  | 9              | HLA-A*02:01 | 725           | 84             | 2032871.84  | 8.40E+01      | 2.03E+06    | 84          | TRUE         | TRUE              |
| 1     | TYVPSQERN | 1048  | 1056 | 9              | HLA-A*02:01 | 1048          | 84             | 2075439.127 | 8.40E+01      | 2.08E+06    | 84          | TRUE         | TRUE              |
| 1     | APACHEGK  | 1060  | 1068 | 9              | HLA-A*02:01 | 1060          | 84             | 2089825.384 | 8.40E+01      | 2.09E+06    | 84          | TRUE         | TRUE              |
| 1     | TGRLQSLQT | 980   | 988  | 9              | HLA-A*02:01 | 980           | 84             | 2158291.001 | 8.40E+01      | 2.16E+06    | 84          | TRUE         | TRUE              |
| 1     | GCVLAWNTR | 418   | 426  | 9              | HLA-A*02:01 | 418           | 85             | 2193360.409 | 8.50E+01      | 2.19E+06    | 85          | TRUE         | TRUE              |
| 1     | SGIAAEQDR | 750   | 758  | 9              | HLA-A*02:01 | 750           | 85             | 2213655.323 | 8.50E+01      | 2.21E+06    | 85          | TRUE         | TRUE              |
| 1     | VRQIAPGQT | 394   | 402  | 9              | HLA-A*02:01 | 394           | 85             | 2234138.023 | 8.50E+01      | 2.23E+06    | 85          | TRUE         | TRUE              |
| 1     | PTTFMLMYD | 259   | 267  | 9              | HLA-A*02:01 | 259           | 85             | 2249624.328 | 8.50E+01      | 2.25E+06    | 85          | TRUE         | TRUE              |
| 1     | LSGIAAEQD | 749   | 757  | 9              | HLA-A*02:01 | 749           | 85             | 2254810.248 | 8.50E+01      | 2.25E+06    | 85          | TRUE         | TRUE              |
| 1     | NCYWPNDY  | 473   | 481  | 9              | HLA-A*02:01 | 473           | 85             | 2270439.846 | 8.50E+01      | 2.27E+06    | 85          | TRUE         | TRUE              |
| 1     | MYKTPILKY | 770   | 778  | 9              | HLA-A*02:01 | 770           | 85             | 2280919.72  | 8.50E+01      | 2.28E+06    | 85          | TRUE         | TRUE              |
| 1     | TDVAQCSQN | 273   | 281  | 9              | HLA-A*02:01 | 273           | 85             | 2302024.81  | 8.50E+01      | 2.30E+06    | 85          | TRUE         | TRUE              |
| 1     | DTSYECDIP | 643   | 651  | 9              | HLA-A*02:01 | 643           | 85             | 2302024.81  | 8.50E+01      | 2.30E+06    | 85          | TRUE         | TRUE              |
| 1     | HTSSMRGVY | 33    | 41   | 9              | HLA-A*02:01 | 33            | 85             | 2323325.184 | 8.50E+01      | 2.32E+06    | 85          | TRUE         | TRUE              |
| 1     | KEELDKYFK | 1131  | 1139 | 9              | HLA-A*02:01 | 1131          | 85             | 2382922.95  | 8.50E+01      | 2.38E+06    | 85          | TRUE         | TRUE              |
| 1     | HGKLRPFER | 445   | 453  | 9              | HLA-A*02:01 | 445           |                |             |               |             |             |              |                   |

| seq # | peptide    | start | end  | peptide length | allele      | peptide index | median binding | smm IC50    | smm percentil | legacy IC50 | legacy rank | scores equal | percentiles equal |
|-------|------------|-------|------|----------------|-------------|---------------|----------------|-------------|---------------|-------------|-------------|--------------|-------------------|
| 1     | LNTLVKQLS  | 941   | 949  | 9              | HLA-A*02:01 | 941           | 86             | 2600818.226 | 8.60E+01      | 2.60E+06    | 86          | TRUE         | TRUE              |
| 1     | VSTAHADQ   | 606   | 614  | 9              | HLA-A*02:01 | 606           | 86             | 2612823.058 | 8.60E+01      | 2.61E+06    | 86          | TRUE         | TRUE              |
| 1     | DDVRIAPAG  | 392   | 400  | 9              | HLA-A*02:01 | 392           | 86             | 2643078.123 | 8.60E+01      | 2.64E+06    | 86          | TRUE         | TRUE              |
| 1     | EDLLFNKVT  | 801   | 809  | 9              | HLA-A*02:01 | 801           | 86             | 2649171.047 | 8.60E+01      | 2.65E+06    | 86          | TRUE         | TRUE              |
| 1     | SKPMGTQTH  | 141   | 149  | 9              | HLA-A*02:01 | 141           | 86             | 2655278.02  | 8.60E+01      | 2.66E+06    | 86          | TRUE         | TRUE              |
| 1     | PYRVVLSF   | 493   | 501  | 9              | HLA-A*02:01 | 493           | 87             | 2761277.156 | 8.70E+01      | 2.76E+06    | 87          | TRUE         | TRUE              |
| 1     | CKFDEDDSE  | 1236  | 1244 | 9              | HLA-A*02:01 | 1236          | 87             | 2806144.3   | 8.70E+01      | 2.81E+06    | 87          | TRUE         | TRUE              |
| 1     | LGQSKRVDF  | 1016  | 1024 | 9              | HLA-A*02:01 | 1016          | 87             | 2851740.477 | 8.70E+01      | 2.85E+06    | 87          | TRUE         | TRUE              |
| 1     | YGECIGDIN  | 819   | 827  | 9              | HLA-A*02:01 | 819           | 87             | 2864903.513 | 8.70E+01      | 2.86E+06    | 87          | TRUE         | TRUE              |
| 1     | TGNNVFQITQ | 624   | 632  | 9              | HLA-A*02:01 | 624           | 87             | 2911454.451 | 8.70E+01      | 2.91E+06    | 87          | TRUE         | TRUE              |
| 1     | ASVVNIQKE  | 1156  | 1164 | 9              | HLA-A*02:01 | 1156          | 87             | 2958761.78  | 8.70E+01      | 2.96E+06    | 87          | TRUE         | TRUE              |
| 1     | KPTKRSFIE  | 793   | 801  | 9              | HLA-A*02:01 | 793           | 87             | 2958761.78  | 8.70E+01      | 2.96E+06    | 87          | TRUE         | TRUE              |
| 1     | SPQITTTDN  | 1093  | 1101 | 9              | HLA-A*02:01 | 1093          | 87             | 2986138.865 | 8.70E+01      | 2.99E+06    | 87          | TRUE         | TRUE              |
| 1     | AAEIRASAN  | 997   | 1005 | 9              | HLA-A*02:01 | 997           | 87             | 3013769.268 | 8.70E+01      | 3.01E+06    | 87          | TRUE         | TRUE              |
| 1     | QERNFTTAP  | 1053  | 1061 | 9              | HLA-A*02:01 | 1053          | 87             | 3034659.719 | 8.70E+01      | 3.03E+06    | 87          | TRUE         | TRUE              |
| 1     | GKLRPFERD  | 446   | 454  | 9              | HLA-A*02:01 | 446           | 88             | 3155803.84  | 8.80E+01      | 3.16E+06    | 88          | TRUE         | TRUE              |
| 1     | CDVVIIGIN  | 1108  | 1116 | 9              | HLA-A*02:01 | 1108          | 88             | 3259192.408 | 8.80E+01      | 3.26E+06    | 88          | TRUE         | TRUE              |
| 1     | VPFSPDGKP  | 458   | 466  | 9              | HLA-A*02:01 | 458           | 88             | 3327438.214 | 8.80E+01      | 3.33E+06    | 88          | TRUE         | TRUE              |
| 1     | SEKSGFNKH  | 173   | 181  | 9              | HLA-A*02:01 | 173           | 88             | 3342796.971 | 8.80E+01      | 3.34E+06    | 88          | TRUE         | TRUE              |
| 1     | WRIYSTGNN  | 619   | 627  | 9              | HLA-A*02:01 | 619           | 88             | 3342796.971 | 8.80E+01      | 3.34E+06    | 88          | TRUE         | TRUE              |
| 1     | ANQFNKAIS  | 906   | 914  | 9              | HLA-A*02:01 | 906           | 88             | 3358226.621 | 8.80E+01      | 3.36E+06    | 88          | TRUE         | TRUE              |
| 1     | QVKQMYKTP  | 766   | 774  | 9              | HLA-A*02:01 | 766           | 88             | 3389299.909 | 8.80E+01      | 3.39E+06    | 88          | TRUE         | TRUE              |
| 1     | QELGKYEYQ  | 1183  | 1191 | 9              | HLA-A*02:01 | 1183          | 88             | 3428546.153 | 8.80E+01      | 3.43E+06    | 88          | TRUE         | TRUE              |
| 1     | TGNYNYYKYR | 433   | 441  | 9              | HLA-A*02:01 | 433           | 88             | 3516494.966 | 8.80E+01      | 3.52E+06    | 88          | TRUE         | TRUE              |
| 1     | DAGFMKQYG  | 812   | 820  | 9              | HLA-A*02:01 | 812           | 88             | 3524601.324 | 8.80E+01      | 3.52E+06    | 88          | TRUE         | TRUE              |
| 1     | DVRIQAPGQ  | 393   | 401  | 9              | HLA-A*02:01 | 393           | 88             | 3532726.369 | 8.80E+01      | 3.53E+06    | 88          | TRUE         | TRUE              |
| 1     | DDSEPVVLKG | 1241  | 1249 | 9              | HLA-A*02:01 | 1241          | 88             | 3540870.144 | 8.80E+01      | 3.54E+06    | 88          | TRUE         | TRUE              |
| 1     | ERDISNVFP  | 452   | 460  | 9              | HLA-A*02:01 | 452           | 89             | 3557214.058 | 8.90E+01      | 3.56E+06    | 89          | TRUE         | TRUE              |
| 1     | AAEQDRNTR  | 753   | 761  | 9              | HLA-A*02:01 | 753           | 89             | 3573633.412 | 8.90E+01      | 3.57E+06    | 89          | TRUE         | TRUE              |
| 1     | SKRFQDPQQ  | 542   | 550  | 9              | HLA-A*02:01 | 542           | 89             | 3590128.555 | 8.90E+01      | 3.59E+06    | 89          | TRUE         | TRUE              |
| 1     | PFSPOGKPC  | 459   | 467  | 9              | HLA-A*02:01 | 459           | 89             | 3623347.605 | 8.90E+01      | 3.62E+06    | 89          | TRUE         | TRUE              |
| 1     | AWERKKISN  | 339   | 347  | 9              | HLA-A*02:01 | 339           | 89             | 3648463.451 | 8.90E+01      | 3.65E+06    | 89          | TRUE         | TRUE              |
| 1     | EKSNVVRGW  | 93    | 101  | 9              | HLA-A*02:01 | 93            | 89             | 3665303.993 | 8.90E+01      | 3.67E+06    | 89          | TRUE         | TRUE              |
| 1     | NCTFEYISD  | 158   | 166  | 9              | HLA-A*02:01 | 158           | 89             | 3665303.993 | 8.90E+01      | 3.67E+06    | 89          | TRUE         | TRUE              |
| 1     | LNESUIDLQ  | 1175  | 1183 | 9              | HLA-A*02:01 | 1175          | 89             | 3707746.213 | 8.90E+01      | 3.71E+06    | 89          | TRUE         | TRUE              |
| 1     | NNVFQIQAG  | 626   | 634  | 9              | HLA-A*02:01 | 626           | 89             | 3716293.451 | 8.90E+01      | 3.72E+06    | 89          | TRUE         | TRUE              |
| 1     | AEHVDTSYE  | 639   | 647  | 9              | HLA-A*02:01 | 639           | 89             | 3750679.891 | 8.90E+01      | 3.75E+06    | 89          | TRUE         | TRUE              |
| 1     | LKCSVKSFE  | 286   | 294  | 9              | HLA-A*02:01 | 286           | 89             | 3767992.242 | 8.90E+01      | 3.77E+06    | 89          | TRUE         | TRUE              |
| 1     | FNKAISIQI  | 909   | 917  | 9              | HLA-A*02:01 | 909           | 89             | 3767992.242 | 8.90E+01      | 3.77E+06    | 89          | TRUE         | TRUE              |
| 1     | CGSCCKFDE  | 1232  | 1240 | 9              | HLA-A*02:01 | 1232          | 89             | 3873557.436 | 8.90E+01      | 3.87E+06    | 89          | TRUE         | TRUE              |
| 1     | QKQIANQFN  | 902   | 910  | 9              | HLA-A*02:01 | 902           | 89             | 3936497.682 | 8.90E+01      | 3.94E+06    | 89          | TRUE         | TRUE              |
| 1     | TGVLTPSSK  | 535   | 543  | 9              | HLA-A*02:01 | 535           | 89             | 3936497.682 | 8.90E+01      | 3.94E+06    | 89          | TRUE         | TRUE              |
| 1     | NFRVVPDGD  | 304   | 312  | 9              | HLA-A*02:01 | 304           | 89             | 3945572.246 | 8.90E+01      | 3.95E+06    | 89          | TRUE         | TRUE              |
| 1     | LDVSEKSGN  | 170   | 178  | 9              | HLA-A*02:01 | 170           | 89             | 4009682.638 | 8.90E+01      | 4.01E+06    | 89          | TRUE         | TRUE              |
| 1     | NNTVYDPLQ  | 1116  | 1124 | 9              | HLA-A*02:01 | 1116          | 89             | 4009682.638 | 8.90E+01      | 4.01E+06    | 89          | TRUE         | TRUE              |
| 1     | QPFQDFGRD  | 546   | 554  | 9              | HLA-A*02:01 | 546           | 90             | 4198653.158 | 9.00E+01      | 4.20E+06    | 90          | TRUE         | TRUE              |
| 1     | PTKRSFIED  | 794   | 802  | 9              | HLA-A*02:01 | 794           | 90             | 4237502.818 | 9.00E+01      | 4.24E+06    | 90          | TRUE         | TRUE              |
| 1     | MRGYYYVPE  | 37    | 45   | 9              | HLA-A*02:01 | 37            | 90             | 4257062.242 | 9.00E+01      | 4.26E+06    | 90          | TRUE         | TRUE              |
| 1     | PGQTGVADI  | 399   | 407  | 9              | HLA-A*02:01 | 399           | 90             | 4257062.24  | 9.00E+01      | 4.26E+06    | 90          | TRUE         | TRUE              |
| 1     | SKRVDFCGK  | 1019  | 1027 | 9              | HLA-A*02:01 | 1019          | 90             | 4276711.949 | 9.00E+01      | 4.28E+06    | 90          | TRUE         | TRUE              |
| 1     | AEQDRNTR   | 754   | 762  | 9              | HLA-A*02:01 | 754           | 90             | 4316283.877 | 9.00E+01      | 4.32E+06    | 90          | TRUE         | TRUE              |
| 1     | KNHTSPDWD  | 1139  | 1147 | 9              | HLA-A*02:01 | 1139          | 90             | 4700131.405 | 9.00E+01      | 4.70E+06    | 90          | TRUE         | TRUE              |
| 1     | VSEKSGNFK  | 172   | 180  | 9              | HLA-A*02:01 | 172           | 90             | 4721826.226 | 9.00E+01      | 4.72E+06    | 90          | TRUE         | TRUE              |
| 1     | LGKYEYQIK  | 1185  | 1193 | 9              | HLA-A*02:01 | 1185          | 91             | 4754556.362 | 9.10E+01      | 4.75E+06    | 91          | TRUE         | TRUE              |
| 1     | DATSTGNYN  | 429   | 437  | 9              | HLA-A*02:01 | 429           | 91             | 4820698.829 | 9.10E+01      | 4.82E+06    | 91          | TRUE         | TRUE              |
| 1     | TEKSNVVRG  | 92    | 100  | 9              | HLA-A*02:01 | 92            | 91             | 4887761.43  | 9.10E+01      | 4.89E+06    | 91          | TRUE         | TRUE              |
| 1     | QNPLAELCK  | 280   | 288  | 9              | HLA-A*02:01 | 280           | 91             | 4910322.312 | 9.10E+01      | 4.91E+06    | 91          | TRUE         | TRUE              |
| 1     | REVFAQVKQ  | 761   | 769  | 9              | HLA-A*02:01 | 761           | 91             | 4932987.33  | 9.10E+01      | 4.93E+06    | 91          | TRUE         | TRUE              |
| 1     | DFTDSVRDP  | 557   | 565  | 9              | HLA-A*02:01 | 557           | 91             | 5322430.51  | 9.10E+01      | 5.32E+06    | 91          | TRUE         | TRUE              |
| 1     | PNYTHQTSS  | 28    | 36   | 9              | HLA-A*02:01 | 28            | 92             | 5573268.932 | 9.20E+01      | 5.57E+06    | 92          | TRUE         | TRUE              |
| 1     | DYNYKLPDD  | 407   | 415  | 9              | HLA-A*02:01 | 407           | 92             | 5650800.826 | 9.20E+01      | 5.65E+06    | 92          | TRUE         | TRUE              |
| 1     | PSGFNTLKP  | 210   | 218  | 9              | HLA-A*02:01 | 210           | 92             | 5650800.826 | 9.20E+01      | 5.65E+06    | 92          | TRUE         | TRUE              |
| 1     | VRDLPSGFN  | 206   | 214  | 9              | HLA-A*02:01 | 206           | 92             | 6110967.866 | 9.20E+01      | 6.11E+06    | 92          | TRUE         | TRUE              |
| 1     | SCCKFDEDD  | 1234  | 1242 | 9              | HLA-A*02:01 | 1234          | 93             | 6340302.81  | 9.30E+01      | 6.34E+06    | 93          | TRUE         | TRUE              |
| 1     | PDVDLGDIS  | 1144  | 1152 | 9              | HLA-A*02:01 | 1144          | 93             | 6669756.823 | 9.30E+01      | 6.67E+06    | 93          | TRUE         | TRUE              |
| 1     | RCTTFDDVQ  | 18    | 26   | 9              | HLA-A*02:01 | 18            | 93             | 6669756.823 | 9.30E+01      | 6.67E+06    | 93          | TRUE         | TRUE              |
| 1     | NKAISIQIE  | 910   | 918  | 9              | HLA-A*02:01 | 910           | 93             | 6888267.433 | 9.30E+01      | 6.89E+06    | 93          | TRUE         | TRUE              |
| 1     | SECVLGQSK  | 1012  | 1020 | 9              | HLA-A*02:01 | 1012          | 93             | 6968029.811 | 9.30E+01      | 6.97E+06    | 93          | TRUE         | TRUE              |
| 1     | EDDSEPVLK  | 1240  | 1248 | 9              | HLA-A*02:01 | 1240          | 93             | 6968029.811 | 9.30E+01      | 6.97E+06    | 93          | TRUE         | TRUE              |
| 1     | GSTMNNKSQ  | 104   | 112  | 9              | HLA-A*02:01 | 104           | 94             | 7432073.57  | 9.40E+01      | 7.43E+06    | 94          | TRUE         | TRUE              |
| 1     | DKGIYQTSN  | 296   | 304  | 9              | HLA-A*02:01 | 296           | 94             | 7587697.352 | 9.40E+01      | 7.59E+06    | 94          | TRUE         | TRUE              |
| 1     | DGIYFAATE  | 85    | 93   | 9              | HLA-A*02:01 | 85            | 94             | 7764437.53  | 9.40E+01      | 7.76E+06    | 94          | TRUE         | TRUE              |
| 1     | QNVLYENQK  | 895   | 903  | 9              | HLA-A*02:01 | 895           | 94             | 7782336.4   | 9.40E+01      | 7.78E+06    | 94          | TRUE         | TRUE              |
| 1     | IFKLPLGIN  | 219   | 227  | 9              | HLA-A*02:01 | 219           | 94             | 8651870.294 | 9.40E+01      | 8.65E+06    | 94          | TRUE         | TRUE              |
| 1     | TNNVIRACN  | 121   | 129  | 9              | HLA-A*02:01 | 121           | 94             | 8914767.066 | 9.40E+01      | 8.91E+06    | 94          | TRUE         | TRUE              |
| 1     | RHGKLRPFE  | 444   | 452  | 9              | HLA-A*02:01 | 444           | 95             | 9143448.01  | 9.50E+01      | 9.14E+06    | 95          | TRUE         | TRUE              |
| 1     | TSTALGKLQ  | 923   | 931  | 9              | HLA-A*02:01 | 923           | 95             | 9313437.4   | 9.50E+01      | 9.31E+06    | 95          | TRUE         | TRUE              |
| 1     | DSVRDPKTS  | 560   | 568  | 9              | HLA-A*02:01 | 560           | 95             | 9888035.11  | 9.50E+01      | 9.89E+06    | 95          | TRUE         | TRUE              |
| 1     | IDRLNEVAK  | 1165  | 1173 | 9              | HLA-A*02:01 | 1165          | 95             | 10118357.04 | 9.50E+01      | 1.01E+07    | 95          | TRUE         | TRUE              |
| 1     | SGNFKHLRE  | 176   | 184  | 9              | HLA-A*02:01 | 176           | 95             | 10211981.04 | 9.50E+01      | 1.02E+07    | 95          | TRUE         | TRUE              |
| 1     | DRLNEVAKN  | 1166  | 1174 | 9              | HLA-A*02:01 | 1166          | 95             | 10473938    | 9.50E+01      | 1.05E+07    | 95          | TRUE         | TRUE              |
| 1     | NEVAKNLNE  | 1169  | 1177 | 9              | HLA-A*02:01 | 1169          | 95             | 10619645.02 | 9.50E+01      | 1.06E+07    | 95          | TRUE         | TRUE              |
| 1     | PDGKPCTPP  | 462   | 470  | 9              | HLA-A*02:01 | 462           | 95             | 10842014.91 | 9.50E+01      | 1.08E+07    | 95          | TRUE         | TRUE              |
| 1     | NGTITDAVD  | 269   | 277  | 9              | HLA-A*02:01 | 269           | 95             | 10867008.33 | 9.50E+01      | 1.09E+07    | 95          | TRUE         | TRUE              |
| 1     | PCTPPALNC  | 466   | 474  | 9              | HLA-A*02:01 | 466           | 96             | 11120133.47 | 9.60E+01      | 1.11E+07    | 96          | TRUE         | TRUE              |
| 1     | DSSIAYSNN  | 684   | 692  | 9              | HLA-A*02:01 | 684           | 96             | 11223026.8  | 9.60E+01      | 1.12E+07    | 96          | TRUE         | TRUE              |
| 1     | PKLSTDLIK  | 513   | 521  | 9              | HLA-A*02:01 | 513           | 96             | 11564051.04 | 9.60E+01      | 1.16E+07    | 96          | TRUE         | TRUE              |
| 1     | DSFKEELDK  | 1128  | 1136 | 9              | HLA-A*02:01 | 1128          | 96             | 11590708.94 | 9.60E+01      | 1.16E+07    | 96          | TRUE         | TRUE              |
| 1     | LRPFERDIS  | 448   | 456  | 9              | HLA-A*02:01 | 448           | 96             | 11697956.44 | 9.60E+01      | 1.17E+07    | 96          | TRUE         | TRUE              |
| 1     | QDVVYNQNAQ | 931   | 939  | 9              | HLA-A*02:01 | 931           | 96             | 12419668.39 | 9.60E+01      | 1.24E+07    | 96          | TRUE         | TRUE              |
| 1     | DNPPFAVSK  | 134   | 142  | 9              | HLA-A*02:01 | 134           | 96             | 12592443.18 | 9.60E+01      | 1.26E+07    | 96          | TRUE         | TRUE              |
| 1     | NDILSLRDK  | 960   | 968  | 9              | HLA-A*0     |               |                |             |               |             |             |              |                   |

| seq # | peptide    | start | end  | peptide length | allele      | peptide index | median binding | smm IC50    | smm percentil | legacy IC50 | legacy rank | scores equal | percentiles equal |
|-------|------------|-------|------|----------------|-------------|---------------|----------------|-------------|---------------|-------------|-------------|--------------|-------------------|
| 1     | TPGTNASSE  | 585   | 593  | 9              | HLA-A*02:01 | 585           | 97             | 17143914.81 | 97            | 17143914.81 | 97          | TRUE         | TRUE              |
| 1     | DNTFVSGNC  | 1100  | 1108 | 9              | HLA-A*02:01 | 1100          | 97             | 18243577.25 | 97            | 18243577.25 | 97          | TRUE         | TRUE              |
| 1     | DPLQPELDS  | 1121  | 1129 | 9              | HLA-A*02:01 | 1121          | 98             | 19235788.8  | 98            | 19235788.8  | 98          | TRUE         | TRUE              |
| 1     | ECVLGQSKR  | 1013  | 1021 | 9              | HLA-A*02:01 | 1013          | 98             | 20096017.49 | 98            | 20096017.49 | 98          | TRUE         | TRUE              |
| 1     | DPLKPTKRS  | 790   | 798  | 9              | HLA-A*02:01 | 790           | 98             | 21883158.2  | 98            | 21883158.2  | 98          | TRUE         | TRUE              |
| 1     | SEPVLGKVK  | 1243  | 1251 | 9              | HLA-A*02:01 | 1243          | 98             | 22289996.49 | 98            | 22289996.49 | 98          | TRUE         | TRUE              |
| 1     | LREFVFKNK  | 182   | 190  | 9              | HLA-A*02:01 | 182           | 98             | 22652179.79 | 98            | 22652179.79 | 98          | TRUE         | TRUE              |
| 1     | QDRNTRVEF  | 756   | 764  | 9              | HLA-A*02:01 | 756           | 98             | 23556458.57 | 98            | 23556458.57 | 98          | TRUE         | TRUE              |
| 1     | LNEVAKNLN  | 1168  | 1176 | 9              | HLA-A*02:01 | 1168          | 98             | 23829229.5  | 98            | 23829229.5  | 98          | TRUE         | TRUE              |
| 1     | CCKFDEDD   | 1235  | 1243 | 9              | HLA-A*02:01 | 1235          | 98             | 24553307.34 | 98            | 24553307.34 | 98          | TRUE         | TRUE              |
| 1     | EGKAYFPRE  | 1066  | 1074 | 9              | HLA-A*02:01 | 1066          | 98             | 24780496.29 | 98            | 24780496.29 | 98          | TRUE         | TRUE              |
| 1     | DSFVVKGDD  | 385   | 393  | 9              | HLA-A*02:01 | 385           | 99             | 26675342.24 | 99            | 26675342.24 | 99          | TRUE         | TRUE              |
| 1     | PDPLKPTKR  | 789   | 797  | 9              | HLA-A*02:01 | 789           | 99             | 26736835.25 | 99            | 26736835.25 | 99          | TRUE         | TRUE              |
| 1     | EFVFKNKDG  | 184   | 192  | 9              | HLA-A*02:01 | 184           | 99             | 29181660.46 | 99            | 29181660.46 | 99          | TRUE         | TRUE              |
| 1     | NPVIFPKDG  | 78    | 86   | 9              | HLA-A*02:01 | 78            | 99             | 29724188.04 | 99            | 29724188.04 | 99          | TRUE         | TRUE              |
| 1     | ENQKQIANQ  | 900   | 908  | 9              | HLA-A*02:01 | 900           | 99             | 31997054.42 | 99            | 31997054.42 | 99          | TRUE         | TRUE              |
| 1     | DCSQNPLAE  | 277   | 285  | 9              | HLA-A*02:01 | 277           | 99             | 33427969.71 | 99            | 33427969.71 | 99          | TRUE         | TRUE              |
| 1     | TREVFQVK   | 760   | 768  | 9              | HLA-A*02:01 | 760           | 99             | 36907106.67 | 99            | 36907106.67 | 99          | TRUE         | TRUE              |
| 1     | LDKVEAEVQ  | 966   | 974  | 9              | HLA-A*02:01 | 966           | 100            | 42472712.71 | 100           | 42472712.71 | 100         | TRUE         | TRUE              |
| 1     | PDEIFRSDT  | 43    | 51   | 9              | HLA-A*02:01 | 43            | 100            | 45825794.16 | 100           | 45825794.16 | 100         | TRUE         | TRUE              |
| 1     | DPKTSEILD  | 564   | 572  | 9              | HLA-A*02:01 | 564           | 100            | 54589611.05 | 100           | 54589611.05 | 100         | TRUE         | TRUE              |
| 1     | DRLITGRLLQ | 976   | 984  | 9              | HLA-A*02:01 | 976           | 100            | 112230268   | 100           | 112230268   | 100         | TRUE         | TRUE              |
| 1     | QKEIDRLNE  | 1162  | 1170 | 9              | HLA-A*02:01 | 1162          | 100            | 115374544.6 | 100           | 115374544.6 | 100         | TRUE         | TRUE              |

| seq # | peptide    | start | end  | peptide length | allele      | peptide index | median binding | comblib_sidne | comblib_sidne | legacy IC50 | legacy rank | scores equal | percentiles equal |
|-------|------------|-------|------|----------------|-------------|---------------|----------------|---------------|---------------|-------------|-------------|--------------|-------------------|
| 1     | FAMQMAYRF  | 880   | 888  | 9              | HLA-A*02:01 | 880           | 0.2            | 2.31E-06      | 0.2           | 2.31E-06    | 0.2         | TRUE         | TRUE              |
| 1     | FSISITTEV  | 700   | 708  | 9              | HLA-A*02:01 | 700           | 0.2            | 2.64E-06      | 0.2           | 2.64E-06    | 0.2         | TRUE         | TRUE              |
| 1     | VLYNSTFFS  | 354   | 362  | 9              | HLA-A*02:01 | 354           | 0.3            | 3.72E-06      | 0.3           | 3.72E-06    | 0.3         | TRUE         | TRUE              |
| 1     | GTSAAAYFV  | 246   | 254  | 9              | HLA-A*02:01 | 246           | 0.7            | 9.62E-06      | 0.7           | 9.62E-06    | 0.7         | TRUE         | TRUE              |
| 1     | RLQSLQTYV  | 982   | 990  | 9              | HLA-A*02:01 | 982           | 0.8            | 1.09E-05      | 0.8           | 1.09E-05    | 0.8         | TRUE         | TRUE              |
| 1     | TSYEQDPI   | 644   | 652  | 9              | HLA-A*02:01 | 644           | 0.8            | 1.17E-05      | 0.8           | 1.17E-05    | 0.8         | TRUE         | TRUE              |
| 1     | FNFSQLPD   | 782   | 790  | 9              | HLA-A*02:01 | 782           | 0.8            | 1.18E-05      | 0.8           | 1.18E-05    | 0.8         | TRUE         | TRUE              |
| 1     | RLDKVEAEV  | 965   | 973  | 9              | HLA-A*02:01 | 965           | 0.9            | 1.47E-05      | 0.9           | 1.47E-05    | 0.9         | TRUE         | TRUE              |
| 1     | FLFLTLTS   | 4     | 12   | 9              | HLA-A*02:01 | 4             | 1              | 1.52E-05      | 1             | 1.52E-05    | 1           | TRUE         | TRUE              |
| 1     | FGNPVPIPK  | 76    | 84   | 9              | HLA-A*02:01 | 76            | 1              | 1.58E-05      | 1             | 1.58E-05    | 1           | TRUE         | TRUE              |
| 1     | FDEDDSEPV  | 1238  | 1246 | 9              | HLA-A*02:01 | 1238          | 1              | 1.63E-05      | 1             | 1.63E-05    | 1           | TRUE         | TRUE              |
| 1     | FVFNGTSWF  | 1077  | 1085 | 9              | HLA-A*02:01 | 1077          | 1              | 1.65E-05      | 1             | 1.65E-05    | 1           | TRUE         | TRUE              |
| 1     | HLMSFPQAA  | 1030  | 1038 | 9              | HLA-A*02:01 | 1030          | 1.1            | 1.88E-05      | 1.1           | 1.88E-05    | 1.1         | TRUE         | TRUE              |
| 1     | ELLNAPATV  | 502   | 510  | 9              | HLA-A*02:01 | 502           | 1.2            | 1.93E-05      | 1.2           | 1.93E-05    | 1.2         | TRUE         | TRUE              |
| 1     | DGKPCCTPPA | 463   | 471  | 9              | HLA-A*02:01 | 463           | 1.4            | 2.22E-05      | 1.4           | 2.22E-05    | 1.4         | TRUE         | TRUE              |
| 1     | FIAGLIAIV  | 1202  | 1210 | 9              | HLA-A*02:01 | 1202          | 1.7            | 2.89E-05      | 1.7           | 2.89E-05    | 1.7         | TRUE         | TRUE              |
| 1     | FELLNAPAT  | 501   | 509  | 9              | HLA-A*02:01 | 501           | 1.7            | 2.92E-05      | 1.7           | 2.92E-05    | 1.7         | TRUE         | TRUE              |
| 1     | FPOAAPHGV  | 1034  | 1042 | 9              | HLA-A*02:01 | 1034          | 1.8            | 3.07E-05      | 1.8           | 3.07E-05    | 1.8         | TRUE         | TRUE              |
| 1     | FNATKFPVS  | 329   | 337  | 9              | HLA-A*02:01 | 329           | 1.8            | 3.12E-05      | 1.8           | 3.12E-05    | 1.8         | TRUE         | TRUE              |
| 1     | DLDRCTTFD  | 15    | 23   | 9              | HLA-A*02:01 | 15            | 1.9            | 3.31E-05      | 1.9           | 3.31E-05    | 1.9         | TRUE         | TRUE              |
| 1     | VVYPDEIFR  | 40    | 48   | 9              | HLA-A*02:01 | 40            | 2              | 3.38E-05      | 2             | 3.38E-05    | 2           | TRUE         | TRUE              |
| 1     | NAFNCTFEY  | 155   | 163  | 9              | HLA-A*02:01 | 155           | 2              | 3.38E-05      | 2             | 3.38E-05    | 2           | TRUE         | TRUE              |
| 1     | FELCDNPF   | 130   | 138  | 9              | HLA-A*02:01 | 130           | 2              | 3.52E-05      | 2             | 3.52E-05    | 2           | TRUE         | TRUE              |
| 1     | RDISNVFES  | 453   | 461  | 9              | HLA-A*02:01 | 453           | 2.1            | 3.68E-05      | 2.1           | 3.68E-05    | 2.1         | TRUE         | TRUE              |
| 1     | FSTFKCYGV  | 361   | 369  | 9              | HLA-A*02:01 | 361           | 2.1            | 3.72E-05      | 2.1           | 3.72E-05    | 2.1         | TRUE         | TRUE              |
| 1     | FEIDKGIYQ  | 293   | 301  | 9              | HLA-A*02:01 | 293           | 2.1            | 3.78E-05      | 2.1           | 3.78E-05    | 2.1         | TRUE         | TRUE              |
| 1     | SNFGAIVSV  | 950   | 958  | 9              | HLA-A*02:01 | 950           | 2.2            | 3.92E-05      | 2.2           | 3.92E-05    | 2.2         | TRUE         | TRUE              |
| 1     | ELCDNPF    | 131   | 139  | 9              | HLA-A*02:01 | 131           | 2.3            | 4.03E-05      | 2.3           | 4.03E-05    | 2.3         | TRUE         | TRUE              |
| 1     | TVYDLPQPE  | 1118  | 1126 | 9              | HLA-A*02:01 | 1118          | 2.3            | 4.07E-05      | 2.3           | 4.07E-05    | 2.3         | TRUE         | TRUE              |
| 1     | AGAAQIIPF  | 872   | 880  | 9              | HLA-A*02:01 | 872           | 2.5            | 4.34E-05      | 2.5           | 4.34E-05    | 2.5         | TRUE         | TRUE              |
| 1     | ALVSGTATA  | 858   | 866  | 9              | HLA-A*02:01 | 858           | 2.6            | 4.57E-05      | 2.6           | 4.57E-05    | 2.6         | TRUE         | TRUE              |
| 1     | NGIGVTONV  | 889   | 897  | 9              | HLA-A*02:01 | 889           | 2.9            | 5.06E-05      | 2.9           | 5.06E-05    | 2.9         | TRUE         | TRUE              |
| 1     | FKLPLGINI  | 220   | 228  | 9              | HLA-A*02:01 | 220           | 2.9            | 5.11E-05      | 2.9           | 5.11E-05    | 2.9         | TRUE         | TRUE              |
| 1     | FLVYKGYQ   | 193   | 201  | 9              | HLA-A*02:01 | 193           | 2.9            | 5.13E-05      | 2.9           | 5.13E-05    | 2.9         | TRUE         | TRUE              |
| 1     | SLIDLQELG  | 1178  | 1186 | 9              | HLA-A*02:01 | 1178          | 2.9            | 5.15E-05      | 2.9           | 5.15E-05    | 2.9         | TRUE         | TRUE              |
| 1     | YLPKPTFML  | 256   | 264  | 9              | HLA-A*02:01 | 256           | 3.2            | 5.55E-05      | 3.2           | 5.55E-05    | 3.2         | TRUE         | TRUE              |
| 1     | KEIDLNEV   | 1163  | 1171 | 9              | HLA-A*02:01 | 1163          | 3.4            | 5.75E-05      | 3.4           | 5.75E-05    | 3.4         | TRUE         | TRUE              |
| 1     | FYSNVTGFH  | 62    | 70   | 9              | HLA-A*02:01 | 62            | 3.5            | 5.89E-05      | 3.5           | 5.89E-05    | 3.5         | TRUE         | TRUE              |
| 1     | VVFLHVTYV  | 1042  | 1050 | 9              | HLA-A*02:01 | 1042          | 3.6            | 6.17E-05      | 3.6           | 6.17E-05    | 3.6         | TRUE         | TRUE              |
| 1     | FITQRNFFS  | 1085  | 1093 | 9              | HLA-A*02:01 | 1085          | 3.6            | 6.24E-05      | 3.6           | 6.24E-05    | 3.6         | TRUE         | TRUE              |
| 1     | ELGKYEYQI  | 1184  | 1192 | 9              | HLA-A*02:01 | 1184          | 3.6            | 6.27E-05      | 3.6           | 6.27E-05    | 3.6         | TRUE         | TRUE              |
| 1     | FFSPQIITT  | 1091  | 1099 | 9              | HLA-A*02:01 | 1091          | 3.7            | 6.47E-05      | 3.7           | 6.47E-05    | 3.7         | TRUE         | TRUE              |
| 1     | LLCCMTSCC  | 1215  | 1223 | 9              | HLA-A*02:01 | 1215          | 3.7            | 6.48E-05      | 3.7           | 6.48E-05    | 3.7         | TRUE         | TRUE              |
| 1     | FLHVTYVPS  | 1044  | 1052 | 9              | HLA-A*02:01 | 1044          | 3.7            | 6.49E-05      | 3.7           | 6.49E-05    | 3.7         | TRUE         | TRUE              |
| 1     | NVYADSFVV  | 381   | 389  | 9              | HLA-A*02:01 | 381           | 3.7            | 6.53E-05      | 3.7           | 6.53E-05    | 3.7         | TRUE         | TRUE              |
| 1     | FRSDTLTYL  | 47    | 55   | 9              | HLA-A*02:01 | 47            | 3.9            | 6.81E-05      | 3.9           | 6.81E-05    | 3.9         | TRUE         | TRUE              |
| 1     | GLIAIVMT   | 1205  | 1213 | 9              | HLA-A*02:01 | 1205          | 3.9            | 6.85E-05      | 3.9           | 6.85E-05    | 3.9         | TRUE         | TRUE              |
| 1     | QOMYKPTPL  | 768   | 776  | 9              | HLA-A*02:01 | 768           | 4.1            | 7.24E-05      | 4.1           | 7.24E-05    | 4.1         | TRUE         | TRUE              |
| 1     | FRAILTAFS  | 231   | 239  | 9              | HLA-A*02:01 | 231           | 4.3            | 7.42E-05      | 4.3           | 7.42E-05    | 4.3         | TRUE         | TRUE              |
| 1     | LLFNKVTLA  | 803   | 811  | 9              | HLA-A*02:01 | 803           | 4.3            | 7.52E-05      | 4.3           | 7.52E-05    | 4.3         | TRUE         | TRUE              |
| 1     | PALNCYWPL  | 470   | 478  | 9              | HLA-A*02:01 | 470           | 4.4            | 7.67E-05      | 4.4           | 7.67E-05    | 4.4         | TRUE         | TRUE              |
| 1     | DLFLPFYSN  | 57    | 65   | 9              | HLA-A*02:01 | 57            | 4.6            | 7.93E-05      | 4.6           | 7.93E-05    | 4.6         | TRUE         | TRUE              |
| 1     | FNTLKPFIK  | 213   | 221  | 9              | HLA-A*02:01 | 213           | 4.6            | 7.98E-05      | 4.6           | 7.98E-05    | 4.6         | TRUE         | TRUE              |
| 1     | ELDSFKEEL  | 1126  | 1134 | 9              | HLA-A*02:01 | 1126          | 4.7            | 8.07E-05      | 4.7           | 8.07E-05    | 4.7         | TRUE         | TRUE              |
| 1     | TNASSEVAV  | 588   | 596  | 9              | HLA-A*02:01 | 588           | 4.7            | 8.12E-05      | 4.7           | 8.12E-05    | 4.7         | TRUE         | TRUE              |
| 1     | FTTAPAICH  | 1057  | 1065 | 9              | HLA-A*02:01 | 1057          | 4.8            | 8.32E-05      | 4.8           | 8.32E-05    | 4.8         | TRUE         | TRUE              |
| 1     | PLAELKCSV  | 282   | 290  | 9              | HLA-A*02:01 | 282           | 4.9            | 8.49E-05      | 4.9           | 8.49E-05    | 4.9         | TRUE         | TRUE              |
| 1     | VLYENKQJQ  | 897   | 905  | 9              | HLA-A*02:01 | 897           | 5              | 8.85E-05      | 5             | 8.85E-05    | 5           | TRUE         | TRUE              |
| 1     | FNGLTVLPP  | 837   | 845  | 9              | HLA-A*02:01 | 837           | 5.1            | 8.97E-05      | 5.1           | 8.97E-05    | 5.1         | TRUE         | TRUE              |
| 1     | VLAWNTRNI  | 420   | 428  | 9              | HLA-A*02:01 | 420           | 5.1            | 9.04E-05      | 5.1           | 9.04E-05    | 5.1         | TRUE         | TRUE              |
| 1     | FTDSVRDPK  | 558   | 566  | 9              | HLA-A*02:01 | 558           | 5.2            | 9.13E-05      | 5.2           | 9.13E-05    | 5.2         | TRUE         | TRUE              |
| 1     | DVSDFTDSV  | 554   | 562  | 9              | HLA-A*02:01 | 554           | 5.2            | 9.21E-05      | 5.2           | 9.21E-05    | 5.2         | TRUE         | TRUE              |
| 1     | TSVDCNMYI  | 716   | 724  | 9              | HLA-A*02:01 | 716           | 5.2            | 9.26E-05      | 5.2           | 9.26E-05    | 5.2         | TRUE         | TRUE              |
| 1     | AYSNTIAI   | 688   | 696  | 9              | HLA-A*02:01 | 688           | 5.4            | 9.38E-05      | 5.4           | 9.38E-05    | 5.4         | TRUE         | TRUE              |
| 1     | FKHLREFVF  | 179   | 187  | 9              | HLA-A*02:01 | 179           | 5.4            | 9.42E-05      | 5.4           | 9.42E-05    | 5.4         | TRUE         | TRUE              |
| 1     | VLNDLSRL   | 958   | 966  | 9              | HLA-A*02:01 | 958           | 5.5            | 9.73E-05      | 5.5           | 9.73E-05    | 5.5         | TRUE         | TRUE              |
| 1     | LNLDLCSNV  | 374   | 382  | 9              | HLA-A*02:01 | 374           | 5.5            | 9.77E-05      | 5.5           | 9.77E-05    | 5.5         | TRUE         | TRUE              |
| 1     | TLYLTQDLF  | 51    | 59   | 9              | HLA-A*02:01 | 51            | 5.7            | 0.00010046    | 5.7           | 0.00010046  | 5.7         | TRUE         | TRUE              |
| 1     | TOAGCLIGA  | 631   | 639  | 9              | HLA-A*02:01 | 631           | 5.7            | 0.00010139    | 5.7           | 0.00010139  | 5.7         | TRUE         | TRUE              |
| 1     | TQDLFLPFY  | 55    | 63   | 9              | HLA-A*02:01 | 55            | 5.9            | 0.00010568    | 5.9           | 0.00010568  | 5.9         | TRUE         | TRUE              |
| 1     | GAAALQIPFA | 873   | 881  | 9              | HLA-A*02:01 | 873           | 6              | 0.00010695    | 6             | 0.00010695  | 6           | TRUE         | TRUE              |
| 1     | LCFSNVYAD  | 377   | 385  | 9              | HLA-A*02:01 | 377           | 6.2            | 0.00011003    | 6.2           | 0.00011003  | 6.2         | TRUE         | TRUE              |
| 1     | FVSGNCDVV  | 1103  | 1111 | 9              | HLA-A*02:01 | 1103          | 6.2            | 0.00011015    | 6.2           | 0.00011015  | 6.2         | TRUE         | TRUE              |
| 1     | NLINESLIDL | 1174  | 1182 | 9              | HLA-A*02:01 | 1174          | 6.2            | 0.00011041    | 6.2           | 0.00011041  | 6.2         | TRUE         | TRUE              |
| 1     | IINNSTNVV  | 116   | 124  | 9              | HLA-A*02:01 | 116           | 6.2            | 0.00011041    | 6.2           | 0.00011041  | 6.2         | TRUE         | TRUE              |
| 1     | GFIAGLIAI  | 1201  | 1209 | 9              | HLA-A*02:01 | 1201          | 6.2            | 0.0001114     | 6.2           | 0.0001114   | 6.2         | TRUE         | TRUE              |
| 1     | KLNDLCFSN  | 373   | 381  | 9              | HLA-A*02:01 | 373           | 6.2            | 0.00011148    | 6.2           | 0.00011148  | 6.2         | TRUE         | TRUE              |
| 1     | ADYSVLVNS  | 350   | 358  | 9              | HLA-A*02:01 | 350           | 6.2            | 0.00011231    | 6.2           | 0.00011231  | 6.2         | TRUE         | TRUE              |
| 1     | LLTDDMIAA  | 846   | 854  | 9              | HLA-A*02:01 | 846           | 6.3            | 0.00011376    | 6.3           | 0.00011376  | 6.3         | TRUE         | TRUE              |
| 1     | TFGNPVIPI  | 75    | 83   | 9              | HLA-A*02:01 | 75            | 6.3            | 0.00011479    | 6.3           | 0.00011479  | 6.3         | TRUE         | TRUE              |
| 1     | FGAGAAALQI | 870   | 878  | 9              | HLA-A*02:01 | 870           | 6.3            | 0.00011508    | 6.3           | 0.00011508  | 6.3         | TRUE         | TRUE              |
| 1     | VLYQDVNCT  | 596   | 604  | 9              | HLA-A*02:01 | 596           | 6.4            | 0.00011561    | 6.4           | 0.00011561  | 6.4         | TRUE         | TRUE              |
| 1     | RIYSTGNVN  | 620   | 628  | 9              | HLA-A*02:01 | 620           | 6.5            | 0.00011722    | 6.5           | 0.00011722  | 6.5         | TRUE         | TRUE              |
| 1     | NOFNKAISQ  | 907   | 915  | 9              | HLA-A*02:01 | 907           | 6.5            | 0.00011768    | 6.5           | 0.00011768  | 6.5         | TRUE         | TRUE              |
| 1     | TLADAGFMK  | 809   | 817  | 9              | HLA-A*02:01 | 809           | 6.5            | 0.00011866    | 6.5           | 0.00011866  | 6.5         | TRUE         | TRUE              |
| 1     | VSMAKTSVD  | 711   | 719  | 9              | HLA-A*02:01 | 711           | 6.5            | 0.0001191     | 6.5           | 0.0001191   | 6.5         | TRUE         | TRUE              |
| 1     | GYHLMSFPQ  | 1028  | 1036 | 9              | HLA-A*02:01 | 1028          | 6.6            | 0.00012048    | 6.6           | 0.00012048  | 6.6         | TRUE         | TRUE              |
| 1     | KGYQPIQDV  | 198   | 206  | 9              | HLA-A*02:01 | 198           | 6.6            | 0.0001205     | 6.6           | 0.0001205   | 6.6         | TRUE         | TRUE              |
| 1     | CLIGAEHVD  | 635   | 643  | 9              | HLA-A*02:01 | 635           | 6.7            | 0.00012165    | 6.7           | 0.00012165  | 6.7         | TRUE         | TRUE              |
| 1     | LLLQVGSFC  | 734   | 742  | 9              | HLA-A*02:01 | 734           | 6.8            | 0.0001234     | 6.8           | 0.0001234   | 6.8         | TRUE         | TRUE              |
| 1     | VVYKGYQPI  | 195   | 203  | 9              | HLA-A*02:01 | 195           | 6.8            | 0.00012359    | 6.8           | 0.00012359  | 6.8         | TRUE         | TRUE              |
| 1     | GNCDVVI    | 1106  | 1114 | 9              | HLA-A*02:01 | 1106          | 6.8            | 0.00012439    | 6.8           | 0.00012439  | 6.8         | TRUE         | TRUE              |
| 1     | SSMRGVYYP  | 35    | 43   | 9              | HLA-A*02:01 | 35            | 6.9            | 0.00012529    | 6.9           | 0.00012529  | 6.9         | TRUE         | TRUE              |
| 1     | FNFNGLTGT  | 527   | 535  | 9              | HLA-A*02:01 | 527           | 6.9            | 0.00012555    | 6.9           | 0.00012555  | 6.9         | TRUE         | TRUE              |
| 1     | LTDDMIAAY  | 847   | 855  | 9              | HLA-A*02:01 | 847           | 7              | 0.00012764    | 7             | 0.00012764  | 7           | TRUE         | TRUE              |
| 1     | ILTAFSPAQ  | 234   | 242  |                |             |               |                |               |               |             |             |              |                   |

| seq # | peptide    | start | end  | peptide length | allele      | peptide index | median binding | comblib_sidne | comblib_sidne | legacy IC50 | legacy rank | scores equal | percentiles equal |
|-------|------------|-------|------|----------------|-------------|---------------|----------------|---------------|---------------|-------------|-------------|--------------|-------------------|
| 1     | QYIKWPWYV  | 1190  | 1198 | 9              | HLA-A*02:01 | 1190          | 7.9            | 0.00014561    | 7.9           | 0.00014561  | 7.9         | TRUE         | TRUE              |
| 1     | IPFAMQMAY  | 878   | 886  | 9              | HLA-A*02:01 | 878           | 7.9            | 0.00014608    | 7.9           | 0.00014608  | 7.9         | TRUE         | TRUE              |
| 1     | MSFPOAAHP  | 1032  | 1040 | 9              | HLA-A*02:01 | 1032          | 8.2            | 0.00015101    | 8.2           | 0.00015101  | 8.2         | TRUE         | TRUE              |
| 1     | SEILDSPC   | 568   | 576  | 9              | HLA-A*02:01 | 568           | 8.2            | 0.00015321    | 8.2           | 0.00015321  | 8.2         | TRUE         | TRUE              |
| 1     | ILPDLPKPT  | 787   | 795  | 9              | HLA-A*02:01 | 787           | 8.3            | 0.00015417    | 8.3           | 0.00015417  | 8.3         | TRUE         | TRUE              |
| 1     | DEDDSEPLV  | 1239  | 1247 | 9              | HLA-A*02:01 | 1239          | 8.4            | 0.00015567    | 8.4           | 0.00015567  | 8.4         | TRUE         | TRUE              |
| 1     | TALGLKQDV  | 925   | 933  | 9              | HLA-A*02:01 | 925           | 8.4            | 0.00015639    | 8.4           | 0.00015639  | 8.4         | TRUE         | TRUE              |
| 1     | SLLRSTSQK  | 664   | 672  | 9              | HLA-A*02:01 | 664           | 8.4            | 0.00015787    | 8.4           | 0.00015787  | 8.4         | TRUE         | TRUE              |
| 1     | ALGKLQDVV  | 926   | 934  | 9              | HLA-A*02:01 | 926           | 8.5            | 0.00015922    | 8.5           | 0.00015922  | 8.5         | TRUE         | TRUE              |
| 1     | NGLTVLPLP  | 838   | 846  | 9              | HLA-A*02:01 | 838           | 8.6            | 0.00015996    | 8.6           | 0.00015996  | 8.6         | TRUE         | TRUE              |
| 1     | KAISQIQES  | 911   | 919  | 9              | HLA-A*02:01 | 911           | 8.6            | 0.00016226    | 8.6           | 0.00016226  | 8.6         | TRUE         | TRUE              |
| 1     | PLNDYGFYT  | 477   | 485  | 9              | HLA-A*02:01 | 477           | 8.7            | 0.00016285    | 8.7           | 0.00016285  | 8.7         | TRUE         | TRUE              |
| 1     | IYFAATEKS  | 87    | 95   | 9              | HLA-A*02:01 | 87            | 8.7            | 0.00016376    | 8.7           | 0.00016376  | 8.7         | TRUE         | TRUE              |
| 1     | KLQDVVNQN  | 929   | 937  | 9              | HLA-A*02:01 | 929           | 8.8            | 0.00016489    | 8.8           | 0.00016489  | 8.8         | TRUE         | TRUE              |
| 1     | IAIPTNFSI  | 694   | 702  | 9              | HLA-A*02:01 | 694           | 8.8            | 0.00016527    | 8.8           | 0.00016527  | 8.8         | TRUE         | TRUE              |
| 1     | VYDPLQPEL  | 1119  | 1127 | 9              | HLA-A*02:01 | 1119          | 8.8            | 0.00016604    | 8.8           | 0.00016604  | 8.8         | TRUE         | TRUE              |
| 1     | MIFDNAFNC  | 151   | 159  | 9              | HLA-A*02:01 | 151           | 9              | 0.00016916    | 9             | 0.00016916  | 9           | TRUE         | TRUE              |
| 1     | AGLIAIVMV  | 1204  | 1212 | 9              | HLA-A*02:01 | 1204          | 9.1            | 0.00017022    | 9.1           | 0.00017022  | 9.1         | TRUE         | TRUE              |
| 1     | FIFLLFLT   | 2     | 10   | 9              | HLA-A*02:01 | 2             | 9.1            | 0.000171      | 9.1           | 0.000171    | 9.1         | TRUE         | TRUE              |
| 1     | EVFNATKFP  | 327   | 335  | 9              | HLA-A*02:01 | 327           | 9.1            | 0.00017104    | 9.1           | 0.00017104  | 9.1         | TRUE         | TRUE              |
| 1     | LCDNPFPAV  | 132   | 140  | 9              | HLA-A*02:01 | 132           | 9.2            | 0.00017155    | 9.2           | 0.00017155  | 9.2         | TRUE         | TRUE              |
| 1     | TDLIKNQCV  | 517   | 525  | 9              | HLA-A*02:01 | 517           | 9.2            | 0.00017155    | 9.2           | 0.00017155  | 9.2         | TRUE         | TRUE              |
| 1     | DILSRDKV   | 961   | 969  | 9              | HLA-A*02:01 | 961           | 9.2            | 0.00017187    | 9.2           | 0.00017187  | 9.2         | TRUE         | TRUE              |
| 1     | FLTLTSGSD  | 7     | 15   | 9              | HLA-A*02:01 | 7             | 9.2            | 0.00017262    | 9.2           | 0.00017262  | 9.2         | TRUE         | TRUE              |
| 1     | TFVSGNCDV  | 1102  | 1110 | 9              | HLA-A*02:01 | 1102          | 9.3            | 0.00017454    | 9.3           | 0.00017454  | 9.3         | TRUE         | TRUE              |
| 1     | SITTEVMVP  | 703   | 711  | 9              | HLA-A*02:01 | 703           | 9.3            | 0.00017498    | 9.3           | 0.00017498  | 9.3         | TRUE         | TRUE              |
| 1     | DDMIAAYTA  | 849   | 857  | 9              | HLA-A*02:01 | 849           | 9.4            | 0.00017807    | 9.4           | 0.00017807  | 9.4         | TRUE         | TRUE              |
| 1     | VIADYNYKL  | 404   | 412  | 9              | HLA-A*02:01 | 404           | 9.4            | 0.00017824    | 9.4           | 0.00017824  | 9.4         | TRUE         | TRUE              |
| 1     | NAQALNTLV  | 937   | 945  | 9              | HLA-A*02:01 | 937           | 9.4            | 0.00017832    | 9.4           | 0.00017832  | 9.4         | TRUE         | TRUE              |
| 1     | FEYISDAFS  | 161   | 169  | 9              | HLA-A*02:01 | 161           | 9.7            | 0.00018281    | 9.7           | 0.00018281  | 9.7         | TRUE         | TRUE              |
| 1     | EQDRNTRFV  | 755   | 763  | 9              | HLA-A*02:01 | 755           | 9.8            | 0.00018323    | 9.8           | 0.00018323  | 9.8         | TRUE         | TRUE              |
| 1     | QIAPGQTGV  | 396   | 404  | 9              | HLA-A*02:01 | 396           | 9.8            | 0.00018365    | 9.8           | 0.00018365  | 9.8         | TRUE         | TRUE              |
| 1     | TAFSPAQDI  | 236   | 244  | 9              | HLA-A*02:01 | 236           | 9.8            | 0.00018374    | 9.8           | 0.00018374  | 9.8         | TRUE         | TRUE              |
| 1     | LLFLTITSG  | 5     | 13   | 9              | HLA-A*02:01 | 5             | 9.9            | 0.00018535    | 9.9           | 0.00018535  | 9.9         | TRUE         | TRUE              |
| 1     | GIINNTVYD  | 1113  | 1121 | 9              | HLA-A*02:01 | 1113          | 10             | 0.00018668    | 10            | 0.00018668  | 10          | TRUE         | TRUE              |
| 1     | RNIDATSTG  | 426   | 434  | 9              | HLA-A*02:01 | 426           | 10             | 0.00018698    | 10            | 0.00018698  | 10          | TRUE         | TRUE              |
| 1     | FDNAFNCTF  | 153   | 161  | 9              | HLA-A*02:01 | 153           | 12             | 0.00019249    | 12            | 0.00019249  | 12          | TRUE         | TRUE              |
| 1     | FNGLTGTGV  | 529   | 537  | 9              | HLA-A*02:01 | 529           | 12             | 0.00019311    | 12            | 0.00019311  | 12          | TRUE         | TRUE              |
| 1     | TMMNKSQSV  | 106   | 114  | 9              | HLA-A*02:01 | 106           | 12             | 0.0001932     | 12            | 0.0001932   | 12          | TRUE         | TRUE              |
| 1     | VQIDRLITG  | 973   | 981  | 9              | HLA-A*02:01 | 973           | 12             | 0.00019498    | 12            | 0.00019498  | 12          | TRUE         | TRUE              |
| 1     | FIEDLFLNK  | 799   | 807  | 9              | HLA-A*02:01 | 799           | 12             | 0.00019692    | 12            | 0.00019692  | 12          | TRUE         | TRUE              |
| 1     | CLGDINARD  | 822   | 830  | 9              | HLA-A*02:01 | 822           | 12             | 0.0001982     | 12            | 0.0001982   | 12          | TRUE         | TRUE              |
| 1     | FPREGVVFV  | 1071  | 1079 | 9              | HLA-A*02:01 | 1071          | 12             | 0.00020119    | 12            | 0.00020119  | 12          | TRUE         | TRUE              |
| 1     | GGVSVITPG  | 579   | 587  | 9              | HLA-A*02:01 | 579           | 12             | 0.00020137    | 12            | 0.00020137  | 12          | TRUE         | TRUE              |
| 1     | FDDVQAPNY  | 22    | 30   | 9              | HLA-A*02:01 | 22            | 12             | 0.00020249    | 12            | 0.00020249  | 12          | TRUE         | TRUE              |
| 1     | SGFNLTLPK  | 211   | 219  | 9              | HLA-A*02:01 | 211           | 12             | 0.00020417    | 12            | 0.00020417  | 12          | TRUE         | TRUE              |
| 1     | FSLDVSEKS  | 168   | 176  | 9              | HLA-A*02:01 | 168           | 12             | 0.00020549    | 12            | 0.00020549  | 12          | TRUE         | TRUE              |
| 1     | FGSTMNNKS  | 103   | 111  | 9              | HLA-A*02:01 | 103           | 12             | 0.00021038    | 12            | 0.00021038  | 12          | TRUE         | TRUE              |
| 1     | LIRAAEIRA  | 994   | 1002 | 9              | HLA-A*02:01 | 994           | 12             | 0.0002138     | 12            | 0.0002138   | 12          | TRUE         | TRUE              |
| 1     | YFKNHTSPD  | 1137  | 1145 | 9              | HLA-A*02:01 | 1137          | 13             | 0.00021727    | 13            | 0.00021727  | 13          | TRUE         | TRUE              |
| 1     | GCLGAEHVF  | 634   | 642  | 9              | HLA-A*02:01 | 634           | 13             | 0.00021847    | 13            | 0.00021847  | 13          | TRUE         | TRUE              |
| 1     | QLSSNFGAI  | 947   | 955  | 9              | HLA-A*02:01 | 947           | 13             | 0.00021928    | 13            | 0.00021928  | 13          | TRUE         | TRUE              |
| 1     | DFMGCVLAW  | 415   | 423  | 9              | HLA-A*02:01 | 415           | 13             | 0.00022019    | 13            | 0.00022019  | 13          | TRUE         | TRUE              |
| 1     | ALSGIAAEQ  | 748   | 756  | 9              | HLA-A*02:01 | 748           | 13             | 0.00022269    | 13            | 0.00022269  | 13          | TRUE         | TRUE              |
| 1     | TKFPSVYAV  | 332   | 340  | 9              | HLA-A*02:01 | 332           | 13             | 0.0002232     | 13            | 0.0002232   | 13          | TRUE         | TRUE              |
| 1     | MIAAYTAAL  | 851   | 859  | 9              | HLA-A*02:01 | 851           | 13             | 0.00022542    | 13            | 0.00022542  | 13          | TRUE         | TRUE              |
| 1     | HTINHTFGN  | 70    | 78   | 9              | HLA-A*02:01 | 70            | 13             | 0.00022615    | 13            | 0.00022615  | 13          | TRUE         | TRUE              |
| 1     | EYISDAFSL  | 162   | 170  | 9              | HLA-A*02:01 | 162           | 13             | 0.00022761    | 13            | 0.00022761  | 13          | TRUE         | TRUE              |
| 1     | KLRPFERDI  | 447   | 455  | 9              | HLA-A*02:01 | 447           | 13             | 0.00022856    | 13            | 0.00022856  | 13          | TRUE         | TRUE              |
| 1     | ILLCMTSC   | 1214  | 1222 | 9              | HLA-A*02:01 | 1214          | 13             | 0.0002319     | 13            | 0.0002319   | 13          | TRUE         | TRUE              |
| 1     | FSPAQDIWG  | 238   | 246  | 9              | HLA-A*02:01 | 238           | 13             | 0.0002327     | 13            | 0.0002327   | 13          | TRUE         | TRUE              |
| 1     | KNKDGFLYV  | 188   | 196  | 9              | HLA-A*02:01 | 188           | 13             | 0.00023324    | 13            | 0.00023324  | 13          | TRUE         | TRUE              |
| 1     | PFYSNVTGF  | 61    | 69   | 9              | HLA-A*02:01 | 61            | 13             | 0.00023372    | 13            | 0.00023372  | 13          | TRUE         | TRUE              |
| 1     | TFDDVOAPN  | 21    | 29   | 9              | HLA-A*02:01 | 21            | 13             | 0.00023394    | 13            | 0.00023394  | 13          | TRUE         | TRUE              |
| 1     | SGIAAEQDR  | 750   | 758  | 9              | HLA-A*02:01 | 750           | 13             | 0.0002341     | 13            | 0.0002341   | 13          | TRUE         | TRUE              |
| 1     | HLREFVFKN  | 181   | 189  | 9              | HLA-A*02:01 | 181           | 13             | 0.00023627    | 13            | 0.00023627  | 13          | TRUE         | TRUE              |
| 1     | ADSSIAYSN  | 683   | 691  | 9              | HLA-A*02:01 | 683           | 13             | 0.00023747    | 13            | 0.00023747  | 13          | TRUE         | TRUE              |
| 1     | ATAGWTFGA  | 864   | 872  | 9              | HLA-A*02:01 | 864           | 13             | 0.00024099    | 13            | 0.00024099  | 13          | TRUE         | TRUE              |
| 1     | FNCTFEYIS  | 157   | 165  | 9              | HLA-A*02:01 | 157           | 13             | 0.00024199    | 13            | 0.00024199  | 13          | TRUE         | TRUE              |
| 1     | FAATEKSNV  | 89    | 97   | 9              | HLA-A*02:01 | 89            | 14             | 0.00024558    | 14            | 0.00024558  | 14          | TRUE         | TRUE              |
| 1     | VVLVSFELLN | 497   | 505  | 9              | HLA-A*02:01 | 497           | 14             | 0.00024957    | 14            | 0.00024957  | 14          | TRUE         | TRUE              |
| 1     | GLTLVPLLP  | 839   | 847  | 9              | HLA-A*02:01 | 839           | 14             | 0.00025177    | 14            | 0.00025177  | 14          | TRUE         | TRUE              |
| 1     | LFLPFYSNV  | 58    | 66   | 9              | HLA-A*02:01 | 58            | 14             | 0.00025229    | 14            | 0.00025229  | 14          | TRUE         | TRUE              |
| 1     | TPAWRYIST  | 616   | 624  | 9              | HLA-A*02:01 | 616           | 14             | 0.00026767    | 14            | 0.00026767  | 14          | TRUE         | TRUE              |
| 1     | FGGVSVITP  | 578   | 586  | 9              | HLA-A*02:01 | 578           | 14             | 0.00026922    | 14            | 0.00026922  | 14          | TRUE         | TRUE              |
| 1     | QLNRALSGI  | 744   | 752  | 9              | HLA-A*02:01 | 744           | 15             | 0.00026977    | 15            | 0.00026977  | 15          | TRUE         | TRUE              |
| 1     | TGIGYQPYR  | 487   | 495  | 9              | HLA-A*02:01 | 487           | 15             | 0.00027252    | 15            | 0.00027252  | 15          | TRUE         | TRUE              |
| 1     | YLTQDLFLP  | 53    | 61   | 9              | HLA-A*02:01 | 53            | 15             | 0.00027359    | 15            | 0.00027359  | 15          | TRUE         | TRUE              |
| 1     | PGTNASSEV  | 586   | 594  | 9              | HLA-A*02:01 | 586           | 15             | 0.00027403    | 15            | 0.00027403  | 15          | TRUE         | TRUE              |
| 1     | SNVYADSFV  | 380   | 388  | 9              | HLA-A*02:01 | 380           | 15             | 0.00027784    | 15            | 0.00027784  | 15          | TRUE         | TRUE              |
| 1     | LKYDENGTI  | 264   | 272  | 9              | HLA-A*02:01 | 264           | 15             | 0.00027797    | 15            | 0.00027797  | 15          | TRUE         | TRUE              |
| 1     | MQMAYRFNG  | 882   | 890  | 9              | HLA-A*02:01 | 882           | 15             | 0.00028314    | 15            | 0.00028314  | 15          | TRUE         | TRUE              |
| 1     | SVKSFEIDK  | 289   | 297  | 9              | HLA-A*02:01 | 289           | 15             | 0.00029127    | 15            | 0.00029127  | 15          | TRUE         | TRUE              |
| 1     | VDCSQNPLA  | 276   | 284  | 9              | HLA-A*02:01 | 276           | 15             | 0.00029268    | 15            | 0.00029268  | 15          | TRUE         | TRUE              |
| 1     | MPVSMAKTS  | 709   | 717  | 9              | HLA-A*02:01 | 709           | 15             | 0.00029349    | 15            | 0.00029349  | 15          | TRUE         | TRUE              |
| 1     | FKDGIYFAA  | 83    | 91   | 9              | HLA-A*02:01 | 83            | 15             | 0.00029376    | 15            | 0.00029376  | 15          | TRUE         | TRUE              |
| 1     | HADQLTPAW  | 611   | 619  | 9              | HLA-A*02:01 | 611           | 15             | 0.00029383    | 15            | 0.00029383  | 15          | TRUE         | TRUE              |
| 1     | AATKMSCEV  | 1007  | 1015 | 9              | HLA-A*02:01 | 1007          | 15             | 0.0002939     | 15            | 0.0002939   | 15          | TRUE         | TRUE              |
| 1     | SNCVADYSV  | 346   | 354  | 9              | HLA-A*02:01 | 346           | 16             | 0.00029771    | 16            | 0.00029771  | 16          | TRUE         | TRUE              |
| 1     | TDVSTAIHA  | 604   | 612  | 9              | HLA-A*02:01 | 604           | 16             | 0.00029813    | 16            | 0.00029813  | 16          | TRUE         | TRUE              |
| 1     | FPSVYAWER  | 334   | 342  | 9              | HLA-A*02:01 | 334           | 16             | 0.00029854    | 16            | 0.00029854  | 16          | TRUE         | TRUE              |
| 1     | IKNQCVNFN  | 520   | 528  | 9              | HLA-A*02:01 | 520           | 16             | 0.00029868    | 16            | 0.00029868  | 16          | TRUE         | TRUE              |
| 1     | DLPSGFNTL  | 208   | 216  | 9              | HLA-A*02:01 | 208           | 16             | 0.00029936    | 16            | 0.00029936  | 16          | TRUE         | TRUE              |
| 1     | NTNLCPFG   | 318   | 326  | 9              | HLA-A*02:01 | 318           | 16             | 0.00030061    | 16            | 0.00030061  | 16          | TRUE         | TRUE              |
| 1     | DLICAQKFN  | 830   | 838  | 9              | HLA-A*02:01 | 830           | 16             | 0.00030088    |               |             |             |              |                   |

| seq # | peptide    | start | end  | peptide length | allele      | peptide index | median binding | comblib_sidne | comblib_sidney | legacy IC50 | legacy rank | scores equal | percentiles equal |
|-------|------------|-------|------|----------------|-------------|---------------|----------------|---------------|----------------|-------------|-------------|--------------|-------------------|
| 1     | QURAAEIR   | 993   | 1001 | 9              | HLA-A*02:01 | 993           | 16             | 0.00031434    | 16             | 0.00031434  | 16          | TRUE         | TRUE              |
| 1     | ANLLLOYGS  | 732   | 740  | 9              | HLA-A*02:01 | 732           | 16             | 0.00032048    | 16             | 0.00032048  | 16          | TRUE         | TRUE              |
| 1     | ADYNYKLPD  | 406   | 414  | 9              | HLA-A*02:01 | 406           | 17             | 0.00032174    | 17             | 0.00032174  | 17          | TRUE         | TRUE              |
| 1     | KAYFPREGV  | 1068  | 1076 | 9              | HLA-A*02:01 | 1068          | 17             | 0.00032226    | 17             | 0.00032226  | 17          | TRUE         | TRUE              |
| 1     | FSPDGKPC   | 460   | 468  | 9              | HLA-A*02:01 | 460           | 17             | 0.00032494    | 17             | 0.00032494  | 17          | TRUE         | TRUE              |
| 1     | DLCSFNVYA  | 376   | 384  | 9              | HLA-A*02:01 | 376           | 17             | 0.00032524    | 17             | 0.00032524  | 17          | TRUE         | TRUE              |
| 1     | FAVSKPMGT  | 138   | 146  | 9              | HLA-A*02:01 | 138           | 17             | 0.00032599    | 17             | 0.00032599  | 17          | TRUE         | TRUE              |
| 1     | ITTDNTFVS  | 1097  | 1105 | 9              | HLA-A*02:01 | 1097          | 17             | 0.00032659    | 17             | 0.00032659  | 17          | TRUE         | TRUE              |
| 1     | IAYSNNNTIA | 687   | 695  | 9              | HLA-A*02:01 | 687           | 17             | 0.00032825    | 17             | 0.00032825  | 17          | TRUE         | TRUE              |
| 1     | SNNTIAIPT  | 690   | 698  | 9              | HLA-A*02:01 | 690           | 17             | 0.00033022    | 17             | 0.00033022  | 17          | TRUE         | TRUE              |
| 1     | FLPFYSNVT  | 59    | 67   | 9              | HLA-A*02:01 | 59            | 17             | 0.00033037    | 17             | 0.00033037  | 17          | TRUE         | TRUE              |
| 1     | NFFSPQIIT  | 1090  | 1098 | 9              | HLA-A*02:01 | 1090          | 17             | 0.00033258    | 17             | 0.00033258  | 17          | TRUE         | TRUE              |
| 1     | LPDDFMGCV  | 412   | 420  | 9              | HLA-A*02:01 | 412           | 17             | 0.00033312    | 17             | 0.00033312  | 17          | TRUE         | TRUE              |
| 1     | IINNSTNV   | 115   | 123  | 9              | HLA-A*02:01 | 115           | 17             | 0.00033343    | 17             | 0.00033343  | 17          | TRUE         | TRUE              |
| 1     | ITFDDVQAP  | 20    | 28   | 9              | HLA-A*02:01 | 20            | 17             | 0.00033504    | 17             | 0.00033504  | 17          | TRUE         | TRUE              |
| 1     | YGSFCTQLN  | 738   | 746  | 9              | HLA-A*02:01 | 738           | 17             | 0.00033744    | 17             | 0.00033744  | 17          | TRUE         | TRUE              |
| 1     | KQIANQFNK  | 903   | 911  | 9              | HLA-A*02:01 | 903           | 17             | 0.00033752    | 17             | 0.00033752  | 17          | TRUE         | TRUE              |
| 1     | IHADQLTPA  | 610   | 618  | 9              | HLA-A*02:01 | 610           | 17             | 0.0003376     | 17             | 0.0003376   | 17          | TRUE         | TRUE              |
| 1     | IEDLLFNKV  | 800   | 808  | 9              | HLA-A*02:01 | 800           | 17             | 0.00033884    | 17             | 0.00033884  | 17          | TRUE         | TRUE              |
| 1     | LPLGINITN  | 222   | 230  | 9              | HLA-A*02:01 | 222           | 17             | 0.00034658    | 17             | 0.00034658  | 17          | TRUE         | TRUE              |
| 1     | SIVAYTMSL  | 673   | 681  | 9              | HLA-A*02:01 | 673           | 17             | 0.00034914    | 17             | 0.00034914  | 17          | TRUE         | TRUE              |
| 1     | RFQPFQOFG  | 544   | 552  | 9              | HLA-A*02:01 | 544           | 17             | 0.00034986    | 17             | 0.00034986  | 17          | TRUE         | TRUE              |
| 1     | LDISPCSG   | 571   | 579  | 9              | HLA-A*02:01 | 571           | 18             | 0.00035188    | 18             | 0.00035188  | 18          | TRUE         | TRUE              |
| 1     | NLAATKMSE  | 1005  | 1013 | 9              | HLA-A*02:01 | 1005          | 18             | 0.00035237    | 18             | 0.00035237  | 18          | TRUE         | TRUE              |
| 1     | IAAYTAALV  | 852   | 860  | 9              | HLA-A*02:01 | 852           | 18             | 0.00035335    | 18             | 0.00035335  | 18          | TRUE         | TRUE              |
| 1     | FSQILPDPL  | 784   | 792  | 9              | HLA-A*02:01 | 784           | 18             | 0.00035547    | 18             | 0.00035547  | 18          | TRUE         | TRUE              |
| 1     | NSTNVVIRA  | 119   | 127  | 9              | HLA-A*02:01 | 119           | 18             | 0.00035793    | 18             | 0.00035793  | 18          | TRUE         | TRUE              |
| 1     | CMTSCCSCL  | 1218  | 1226 | 9              | HLA-A*02:01 | 1218          | 18             | 0.00036141    | 18             | 0.00036141  | 18          | TRUE         | TRUE              |
| 1     | VDCNMYICG  | 718   | 726  | 9              | HLA-A*02:01 | 718           | 18             | 0.00036174    | 18             | 0.00036174  | 18          | TRUE         | TRUE              |
| 1     | INHFTGNPV  | 72    | 80   | 9              | HLA-A*02:01 | 72            | 18             | 0.00036627    | 18             | 0.00036627  | 18          | TRUE         | TRUE              |
| 1     | VTLADAGFM  | 808   | 816  | 9              | HLA-A*02:01 | 808           | 18             | 0.00036728    | 18             | 0.00036728  | 18          | TRUE         | TRUE              |
| 1     | DGLFVYVYG  | 191   | 199  | 9              | HLA-A*02:01 | 191           | 18             | 0.00036745    | 18             | 0.00036745  | 18          | TRUE         | TRUE              |
| 1     | RDUCIAQKF  | 829   | 837  | 9              | HLA-A*02:01 | 829           | 18             | 0.00037188    | 18             | 0.00037188  | 18          | TRUE         | TRUE              |
| 1     | IVQTSNFRV  | 299   | 307  | 9              | HLA-A*02:01 | 299           | 18             | 0.00037342    | 18             | 0.00037342  | 18          | TRUE         | TRUE              |
| 1     | SVYAWERKK  | 336   | 344  | 9              | HLA-A*02:01 | 336           | 19             | 0.0003787     | 19             | 0.0003787   | 19          | TRUE         | TRUE              |
| 1     | LLNAPATVC  | 503   | 511  | 9              | HLA-A*02:01 | 503           | 19             | 0.00038133    | 19             | 0.00038133  | 19          | TRUE         | TRUE              |
| 1     | KLPLGINIT  | 221   | 229  | 9              | HLA-A*02:01 | 221           | 19             | 0.00038637    | 19             | 0.00038637  | 19          | TRUE         | TRUE              |
| 1     | NLCPFGEVF  | 321   | 329  | 9              | HLA-A*02:01 | 321           | 19             | 0.00038815    | 19             | 0.00038815  | 19          | TRUE         | TRUE              |
| 1     | WLGFIAGLI  | 1199  | 1207 | 9              | HLA-A*02:01 | 1199          | 19             | 0.00039355    | 19             | 0.00039355  | 19          | TRUE         | TRUE              |
| 1     | RALSIGIAE  | 747   | 755  | 9              | HLA-A*02:01 | 747           | 20             | 0.00040383    | 20             | 0.00040383  | 20          | TRUE         | TRUE              |
| 1     | IFRSDTLYL  | 46    | 54   | 9              | HLA-A*02:01 | 46            | 20             | 0.00040448    | 20             | 0.00040448  | 20          | TRUE         | TRUE              |
| 1     | YQTSNFRVV  | 300   | 308  | 9              | HLA-A*02:01 | 300           | 20             | 0.00040551    | 20             | 0.00040551  | 20          | TRUE         | TRUE              |
| 1     | GDISGINAS  | 1149  | 1157 | 9              | HLA-A*02:01 | 1149          | 20             | 0.0004087     | 20             | 0.0004087   | 20          | TRUE         | TRUE              |
| 1     | GNMYNRYRY  | 434   | 442  | 9              | HLA-A*02:01 | 434           | 20             | 0.00041191    | 20             | 0.00041191  | 20          | TRUE         | TRUE              |
| 1     | VTQNVLYEN  | 893   | 901  | 9              | HLA-A*02:01 | 893           | 20             | 0.00041419    | 20             | 0.00041419  | 20          | TRUE         | TRUE              |
| 1     | QTYVTQQQL  | 987   | 995  | 9              | HLA-A*02:01 | 987           | 20             | 0.00041976    | 20             | 0.00041976  | 20          | TRUE         | TRUE              |
| 1     | TKMSECVLG  | 1009  | 1017 | 9              | HLA-A*02:01 | 1009          | 20             | 0.00042267    | 20             | 0.00042267  | 20          | TRUE         | TRUE              |
| 1     | YTAALVSGT  | 855   | 863  | 9              | HLA-A*02:01 | 855           | 20             | 0.00042364    | 20             | 0.00042364  | 20          | TRUE         | TRUE              |
| 1     | IRASANLAA  | 1000  | 1008 | 9              | HLA-A*02:01 | 1000          | 20             | 0.00042501    | 20             | 0.00042501  | 20          | TRUE         | TRUE              |
| 1     | LLRSTQSKS  | 665   | 673  | 9              | HLA-A*02:01 | 665           | 20             | 0.0004256     | 20             | 0.0004256   | 20          | TRUE         | TRUE              |
| 1     | QDIWGTSA   | 242   | 250  | 9              | HLA-A*02:01 | 242           | 20             | 0.00042599    | 20             | 0.00042599  | 20          | TRUE         | TRUE              |
| 1     | RNFTTAPAI  | 1055  | 1063 | 9              | HLA-A*02:01 | 1055          | 20             | 0.00042638    | 20             | 0.00042638  | 20          | TRUE         | TRUE              |
| 1     | YECDPIGA   | 646   | 654  | 9              | HLA-A*02:01 | 646           | 20             | 0.00042658    | 20             | 0.00042658  | 20          | TRUE         | TRUE              |
| 1     | VNIQKEIDR  | 1159  | 1167 | 9              | HLA-A*02:01 | 1159          | 20             | 0.00042678    | 20             | 0.00042678  | 20          | TRUE         | TRUE              |
| 1     | PLQELDSF   | 1122  | 1130 | 9              | HLA-A*02:01 | 1122          | 21             | 0.00043934    | 21             | 0.00043934  | 21          | TRUE         | TRUE              |
| 1     | ISGINASVV  | 1151  | 1159 | 9              | HLA-A*02:01 | 1151          | 21             | 0.00043934    | 21             | 0.00043934  | 21          | TRUE         | TRUE              |
| 1     | IITDNTFV   | 1096  | 1104 | 9              | HLA-A*02:01 | 1096          | 21             | 0.00043954    | 21             | 0.00043954  | 21          | TRUE         | TRUE              |
| 1     | TSWFITQRN  | 1082  | 1090 | 9              | HLA-A*02:01 | 1082          | 21             | 0.00044055    | 21             | 0.00044055  | 21          | TRUE         | TRUE              |
| 1     | PWYVWLGFI  | 1195  | 1203 | 9              | HLA-A*02:01 | 1195          | 21             | 0.00044096    | 21             | 0.00044096  | 21          | TRUE         | TRUE              |
| 1     | YVWLGFIAG  | 1197  | 1205 | 9              | HLA-A*02:01 | 1197          | 21             | 0.00045082    | 21             | 0.00045082  | 21          | TRUE         | TRUE              |
| 1     | VDLGDISGI  | 1146  | 1154 | 9              | HLA-A*02:01 | 1146          | 21             | 0.00045331    | 21             | 0.00045331  | 21          | TRUE         | TRUE              |
| 1     | KLSTDLIKN  | 514   | 522  | 9              | HLA-A*02:01 | 514           | 21             | 0.00045415    | 21             | 0.00045415  | 21          | TRUE         | TRUE              |
| 1     | FQTAGGCU   | 629   | 637  | 9              | HLA-A*02:01 | 629           | 21             | 0.00045709    | 21             | 0.00045709  | 21          | TRUE         | TRUE              |
| 1     | FKCYGVSAT  | 364   | 372  | 9              | HLA-A*02:01 | 364           | 21             | 0.00046026    | 21             | 0.00046026  | 21          | TRUE         | TRUE              |
| 1     | AYRFNGIGV  | 885   | 893  | 9              | HLA-A*02:01 | 885           | 21             | 0.00046047    | 21             | 0.00046047  | 21          | TRUE         | TRUE              |
| 1     | FGRDVSDF   | 551   | 559  | 9              | HLA-A*02:01 | 551           | 21             | 0.00046452    | 21             | 0.00046452  | 21          | TRUE         | TRUE              |
| 1     | AKNLNESLI  | 1172  | 1180 | 9              | HLA-A*02:01 | 1172          | 21             | 0.00046559    | 21             | 0.00046559  | 21          | TRUE         | TRUE              |
| 1     | SRLDKVEAE  | 964   | 972  | 9              | HLA-A*02:01 | 964           | 21             | 0.00046817    | 21             | 0.00046817  | 21          | TRUE         | TRUE              |
| 1     | LQSLQTYVT  | 983   | 991  | 9              | HLA-A*02:01 | 983           | 22             | 0.00046881    | 22             | 0.00046881  | 22          | TRUE         | TRUE              |
| 1     | KMSECVLGQ  | 1010  | 1018 | 9              | HLA-A*02:01 | 1010          | 22             | 0.0004761     | 22             | 0.0004761   | 22          | TRUE         | TRUE              |
| 1     | DLKNQCVN   | 518   | 526  | 9              | HLA-A*02:01 | 518           | 22             | 0.00047797    | 22             | 0.00047797  | 22          | TRUE         | TRUE              |
| 1     | WGTSAAYF   | 245   | 253  | 9              | HLA-A*02:01 | 245           | 22             | 0.00047863    | 22             | 0.00047863  | 22          | TRUE         | TRUE              |
| 1     | CSFGGVSVI  | 576   | 584  | 9              | HLA-A*02:01 | 576           | 22             | 0.00048843    | 22             | 0.00048843  | 22          | TRUE         | TRUE              |
| 1     | FMLKYDENG  | 262   | 270  | 9              | HLA-A*02:01 | 262           | 22             | 0.00049204    | 22             | 0.00049204  | 22          | TRUE         | TRUE              |
| 1     | AILTAFSPA  | 233   | 241  | 9              | HLA-A*02:01 | 233           | 22             | 0.00049317    | 22             | 0.00049317  | 22          | TRUE         | TRUE              |
| 1     | SNFRVVP    | 303   | 311  | 9              | HLA-A*02:01 | 303           | 22             | 0.00049636    | 22             | 0.00049636  | 22          | TRUE         | TRUE              |
| 1     | IPTNFSISI  | 696   | 704  | 9              | HLA-A*02:01 | 696           | 22             | 0.00049728    | 22             | 0.00049728  | 22          | TRUE         | TRUE              |
| 1     | FSPQIITD   | 1092  | 1100 | 9              | HLA-A*02:01 | 1092          | 22             | 0.00050338    | 22             | 0.00050338  | 22          | TRUE         | TRUE              |
| 1     | TQLNRALSG  | 743   | 751  | 9              | HLA-A*02:01 | 743           | 23             | 0.0005105     | 23             | 0.0005105   | 23          | TRUE         | TRUE              |
| 1     | SLDVSEKSG  | 169   | 177  | 9              | HLA-A*02:01 | 169           | 23             | 0.00051404    | 23             | 0.00051404  | 23          | TRUE         | TRUE              |
| 1     | FQPFQQFGR  | 545   | 553  | 9              | HLA-A*02:01 | 545           | 23             | 0.0005157     | 23             | 0.0005157   | 23          | TRUE         | TRUE              |
| 1     | TLVKQLSSN  | 943   | 951  | 9              | HLA-A*02:01 | 943           | 23             | 0.00051665    | 23             | 0.00051665  | 23          | TRUE         | TRUE              |
| 1     | TQRNFFSPQ  | 1087  | 1095 | 9              | HLA-A*02:01 | 1087          | 23             | 0.00051844    | 23             | 0.00051844  | 23          | TRUE         | TRUE              |
| 1     | RAITAFSP   | 232   | 240  | 9              | HLA-A*02:01 | 232           | 23             | 0.00052638    | 23             | 0.00052638  | 23          | TRUE         | TRUE              |
| 1     | ANLAATKMS  | 1004  | 1012 | 9              | HLA-A*02:01 | 1004          | 23             | 0.00053064    | 23             | 0.00053064  | 23          | TRUE         | TRUE              |
| 1     | GVSVITPGT  | 580   | 588  | 9              | HLA-A*02:01 | 580           | 23             | 0.00053456    | 23             | 0.00053456  | 23          | TRUE         | TRUE              |
| 1     | MLKYDENG   | 263   | 271  | 9              | HLA-A*02:01 | 263           | 23             | 0.0005358     | 23             | 0.0005358   | 23          | TRUE         | TRUE              |
| 1     | SVLNDILSR  | 957   | 965  | 9              | HLA-A*02:01 | 957           | 23             | 0.00053753    | 23             | 0.00053753  | 23          | TRUE         | TRUE              |
| 1     | RLNEVAKNL  | 1167  | 1175 | 9              | HLA-A*02:01 | 1167          | 24             | 0.00054325    | 24             | 0.00054325  | 24          | TRUE         | TRUE              |
| 1     | AQALNTLVK  | 938   | 946  | 9              | HLA-A*02:01 | 938           | 24             | 0.00054739    | 24             | 0.00054739  | 24          | TRUE         | TRUE              |
| 1     | KLPPDFMGC  | 411   | 419  | 9              | HLA-A*02:01 | 411           | 24             | 0.00054866    | 24             | 0.00054866  | 24          | TRUE         | TRUE              |
| 1     | VFLHVTYVP  | 1043  | 1051 | 9              | HLA-A*02:01 | 1043          | 24             | 0.00055081    | 24             | 0.00055081  | 24          | TRUE         | TRUE              |
| 1     | DVQAPNMYTQ | 24    | 32   | 9              | HLA-A*02:01 | 24            | 24             | 0.00055195    | 24             | 0.00055195  | 24          | TRUE         | TRUE              |
| 1     | LTQDLFLPF  | 54    | 62   | 9              | HLA-A*02:01 | 54            | 24             | 0.00055463    | 24             | 0.00055463  | 24          | TRUE         | TRUE              |
| 1     | VRFPNITNL  | 314   | 322  | 9              | HLA-A*02:01 | 314           | 24             | 0.0005577     | 24             | 0.0005577</ |             |              |                   |

| seq # | peptide    | start | end   | peptide length | allele      | peptide index | median binding | comblib_sidne | comblib_sidne | legacy IC50 | legacy rank | scores equal | percentiles equal |
|-------|------------|-------|-------|----------------|-------------|---------------|----------------|---------------|---------------|-------------|-------------|--------------|-------------------|
| 1     | ALNCWPLN   | 471   | 479   | 9              | HLA-A*02:01 | 471           | 25             | 0.00058506    | 25            | 0.00058506  | 25          | TRUE         | TRUE              |
| 1     | CTFEYISDA  | 159   | 167   | 9              | HLA-A*02:01 | 159           | 25             | 0.00058884    | 25            | 0.00058884  | 25          | TRUE         | TRUE              |
| 1     | POAAPHGVV  | 1035  | 1043  | 9              | HLA-A*02:01 | 1035          | 25             | 0.00059814    | 25            | 0.00059814  | 25          | TRUE         | TRUE              |
| 1     | SFELLNAPA  | 500   | 508   | 9              | HLA-A*02:01 | 500           | 25             | 0.00060104    | 25            | 0.00060104  | 25          | TRUE         | TRUE              |
| 1     | QTHTMIFDN  | 147   | 155   | 9              | HLA-A*02:01 | 147           | 25             | 0.00060284    | 25            | 0.00060284  | 25          | TRUE         | TRUE              |
| 1     | DTLYLTQDL  | 50    | 58    | 9              | HLA-A*02:01 | 50            | 25             | 0.00060842    | 25            | 0.00060842  | 25          | TRUE         | TRUE              |
| 1     | TKLNDLCFS  | 372   | 380   | 9              | HLA-A*02:01 | 372           | 25             | 0.00061094    | 25            | 0.00061094  | 25          | TRUE         | TRUE              |
| 1     | FCTQLNRLA  | 741   | 749   | 9              | HLA-A*02:01 | 741           | 25             | 0.0006115     | 25            | 0.0006115   | 25          | TRUE         | TRUE              |
| 1     | SCGSCKKFD  | 1231  | 1239  | 9              | HLA-A*02:01 | 1231          | 25             | 0.00061165    | 25            | 0.00061165  | 25          | TRUE         | TRUE              |
| 1     | STFFSTFKC  | 358   | 366   | 9              | HLA-A*02:01 | 358           | 26             | 0.00061277    | 26            | 0.00061277  | 26          | TRUE         | TRUE              |
| 1     | SMRGVYYPD  | 36    | 44    | 9              | HLA-A*02:01 | 36            | 26             | 0.0006139     | 26            | 0.0006139   | 26          | TRUE         | TRUE              |
| 1     | FFAVSKPMG  | 137   | 145   | 9              | HLA-A*02:01 | 137           | 26             | 0.00061645    | 26            | 0.00061645  | 26          | TRUE         | TRUE              |
| 1     | GIYFAATEK  | 86    | 94    | 9              | HLA-A*02:01 | 86            | 26             | 0.00061987    | 26            | 0.00061987  | 26          | TRUE         | TRUE              |
| 1     | FGGFNFSQL  | 779   | 787   | 9              | HLA-A*02:01 | 779           | 26             | 0.00062087    | 26            | 0.00062087  | 26          | TRUE         | TRUE              |
| 1     | VIGIINNTV  | 1111  | 1119  | 9              | HLA-A*02:01 | 1111          | 26             | 0.00062087    | 26            | 0.00062087  | 26          | TRUE         | TRUE              |
| 1     | TLTSGSDLD  | 9     | 17    | 9              | HLA-A*02:01 | 9             | 26             | 0.00062101    | 26            | 0.00062101  | 26          | TRUE         | TRUE              |
| 1     | GICASYHTV  | 655   | 663   | 9              | HLA-A*02:01 | 655           | 26             | 0.0006223     | 26            | 0.0006223   | 26          | TRUE         | TRUE              |
| 1     | IAGLIAIYM  | 1203  | 1211  | 9              | HLA-A*02:01 | 1203          | 26             | 0.00062402    | 26            | 0.00062402  | 26          | TRUE         | TRUE              |
| 1     | VVLWGFIAL  | 1198  | 1206  | 9              | HLA-A*02:01 | 1198          | 26             | 0.0006246     | 26            | 0.0006246   | 26          | TRUE         | TRUE              |
| 1     | CVLAWNTRN  | 419   | 427   | 9              | HLA-A*02:01 | 419           | 26             | 0.0006269     | 26            | 0.0006269   | 26          | TRUE         | TRUE              |
| 1     | NFELCDNPF  | 129   | 137   | 9              | HLA-A*02:01 | 129           | 26             | 0.00062791    | 26            | 0.00062791  | 26          | TRUE         | TRUE              |
| 1     | NLLLOYGSF  | 733   | 741   | 9              | HLA-A*02:01 | 733           | 26             | 0.00062951    | 26            | 0.00062951  | 26          | TRUE         | TRUE              |
| 1     | HINNTVYDP  | 1114  | 1122  | 9              | HLA-A*02:01 | 1114          | 26             | 0.0006311     | 26            | 0.0006311   | 26          | TRUE         | TRUE              |
| 1     | MSLGADSSI  | 679   | 687   | 9              | HLA-A*02:01 | 679           | 26             | 0.00063212    | 26            | 0.00063212  | 26          | TRUE         | TRUE              |
| 1     | TILLCCMTS  | 1213  | 1221  | 9              | HLA-A*02:01 | 1213          | 26             | 0.00063241    | 26            | 0.00063241  | 26          | TRUE         | TRUE              |
| 1     | DSTECANLL  | 727   | 735   | 9              | HLA-A*02:01 | 727           | 26             | 0.00063533    | 26            | 0.00063533  | 26          | TRUE         | TRUE              |
| 1     | FNKAISQIQ  | 909   | 917   | 9              | HLA-A*02:01 | 909           | 26             | 0.00063606    | 26            | 0.00063606  | 26          | TRUE         | TRUE              |
| 1     | FAQVKQMYK  | 764   | 772   | 9              | HLA-A*02:01 | 764           | 26             | 0.00064047    | 26            | 0.00064047  | 26          | TRUE         | TRUE              |
| 1     | EILDSPCS   | 569   | 577   | 9              | HLA-A*02:01 | 569           | 26             | 0.00064565    | 26            | 0.00064565  | 26          | TRUE         | TRUE              |
| 1     | FRVVPSPGV  | 305   | 313   | 9              | HLA-A*02:01 | 305           | 27             | 0.00065826    | 27            | 0.00065826  | 27          | TRUE         | TRUE              |
| 1     | RPFERDISN  | 449   | 457   | 9              | HLA-A*02:01 | 449           | 27             | 0.00066039    | 27            | 0.00066039  | 27          | TRUE         | TRUE              |
| 1     | TIATPTNFS  | 693   | 701   | 9              | HLA-A*02:01 | 693           | 27             | 0.00066222    | 27            | 0.00066222  | 27          | TRUE         | TRUE              |
| 1     | YGFYTTTGI  | 481   | 489   | 9              | HLA-A*02:01 | 481           | 27             | 0.00066222    | 27            | 0.00066222  | 27          | TRUE         | TRUE              |
| 1     | NGTWSFITQ  | 1080  | 1088  | 9              | HLA-A*02:01 | 1080          | 27             | 0.00066328    | 27            | 0.00066328  | 27          | TRUE         | TRUE              |
| 1     | AVDCSQNPL  | 275   | 283   | 9              | HLA-A*02:01 | 275           | 27             | 0.00066374    | 27            | 0.00066374  | 27          | TRUE         | TRUE              |
| 1     | ERNFTTAPA  | 1054  | 1062  | 9              | HLA-A*02:01 | 1054          | 27             | 0.00066589    | 27            | 0.00066589  | 27          | TRUE         | TRUE              |
| 1     | IAIVMVTIL  | 1207  | 1215  | 9              | HLA-A*02:01 | 1207          | 27             | 0.00067019    | 27            | 0.00067019  | 27          | TRUE         | TRUE              |
| 1     | ASYHTVSL   | 658   | 666   | 9              | HLA-A*02:01 | 658           | 27             | 0.0006733     | 27            | 0.0006733   | 27          | TRUE         | TRUE              |
| 1     | LQIPFAMQM  | 876   | 884   | 9              | HLA-A*02:01 | 876           | 27             | 0.00067764    | 27            | 0.00067764  | 27          | TRUE         | TRUE              |
| 1     | STGNVNYKY  | 432   | 440   | 9              | HLA-A*02:01 | 432           | 27             | 0.0006792     | 27            | 0.0006792   | 27          | TRUE         | TRUE              |
| 1     | EIDKGIYQT  | 294   | 302   | 9              | HLA-A*02:01 | 294           | 27             | 0.00068077    | 27            | 0.00068077  | 27          | TRUE         | TRUE              |
| 1     | ITNLCPFGE  | 319   | 327   | 9              | HLA-A*02:01 | 319           | 27             | 0.00068234    | 27            | 0.00068234  | 27          | TRUE         | TRUE              |
| 1     | TKRSFIEDL  | 795   | 803   | 9              | HLA-A*02:01 | 795           | 27             | 0.00068391    | 27            | 0.00068391  | 27          | TRUE         | TRUE              |
| 1     | VEAEVOIDR  | 969   | 977   | 9              | HLA-A*02:01 | 969           | 27             | 0.00068612    | 27            | 0.00068612  | 27          | TRUE         | TRUE              |
| 1     | IGYQPYRVV  | 489   | 497   | 9              | HLA-A*02:01 | 489           | 28             | 0.00069024    | 28            | 0.00069024  | 28          | TRUE         | TRUE              |
| 1     | PPALNCYWP  | 469   | 477   | 9              | HLA-A*02:01 | 469           | 28             | 0.00069263    | 28            | 0.00069263  | 28          | TRUE         | TRUE              |
| 1     | CYWPLNDYG  | 474   | 482   | 9              | HLA-A*02:01 | 474           | 28             | 0.00069534    | 28            | 0.00069534  | 28          | TRUE         | TRUE              |
| 1     | GIQYTSNFR  | 298   | 306   | 9              | HLA-A*02:01 | 298           | 28             | 0.00069566    | 28            | 0.00069566  | 28          | TRUE         | TRUE              |
| 1     | YGVSATKLN  | 367   | 375   | 9              | HLA-A*02:01 | 367           | 28             | 0.0007034     | 28            | 0.0007034   | 28          | TRUE         | TRUE              |
| 1     | SCCSCLKGA  | 1221  | 1229  | 9              | HLA-A*02:01 | 1221          | 28             | 0.00070372    | 28            | 0.00070372  | 28          | TRUE         | TRUE              |
| 1     | NKDGFLVYV  | 189   | 197   | 9              | HLA-A*02:01 | 189           | 28             | 0.00070632    | 28            | 0.00070632  | 28          | TRUE         | TRUE              |
| 1     | NKQSIVIII  | 109   | 117   | 9              | HLA-A*02:01 | 109           | 28             | 0.00070632    | 28            | 0.00070632  | 28          | TRUE         | TRUE              |
| 1     | YQDVNCTDV  | 598   | 606   | 9              | HLA-A*02:01 | 598           | 28             | 0.00070795    | 28            | 0.00070795  | 28          | TRUE         | TRUE              |
| 1     | VAYTMSLGA  | 675   | 683   | 9              | HLA-A*02:01 | 675           | 28             | 0.00071812    | 28            | 0.00071812  | 28          | TRUE         | TRUE              |
| 1     | ICGDSSTEA  | 724   | 732   | 9              | HLA-A*02:01 | 724           | 29             | 0.0007251     | 29            | 0.0007251   | 29          | TRUE         | TRUE              |
| 1     | KISNCVADY  | 344   | 352   | 9              | HLA-A*02:01 | 344           | 29             | 0.00072611    | 29            | 0.00072611  | 29          | TRUE         | TRUE              |
| 1     | AGFMKQYGE  | 813   | 821   | 9              | HLA-A*02:01 | 813           | 29             | 0.00072946    | 29            | 0.00072946  | 29          | TRUE         | TRUE              |
| 1     | ILDISPCSF  | 570   | 578   | 9              | HLA-A*02:01 | 570           | 29             | 0.00073451    | 29            | 0.00073451  | 29          | TRUE         | TRUE              |
| 1     | QKQIANQFN  | 902   | 910   | 9              | HLA-A*02:01 | 902           | 29             | 0.00073485    | 29            | 0.00073485  | 29          | TRUE         | TRUE              |
| 1     | QHTSSMRGV  | 32    | 40    | 9              | HLA-A*02:01 | 32            | 29             | 0.00073689    | 29            | 0.00073689  | 29          | TRUE         | TRUE              |
| 1     | YYPDEFIRS  | 41    | 49    | 9              | HLA-A*02:01 | 41            | 29             | 0.00073824    | 29            | 0.00073824  | 29          | TRUE         | TRUE              |
| 1     | VLPLLTDD   | 842   | 850   | 9              | HLA-A*02:01 | 842           | 29             | 0.00073978    | 29            | 0.00073978  | 29          | TRUE         | TRUE              |
| 1     | QQIRAAEI   | 992   | 1000  | 9              | HLA-A*02:01 | 992           | 29             | 0.00074302    | 29            | 0.00074302  | 29          | TRUE         | TRUE              |
| 1     | LNAPATVCG  | 504   | 512   | 9              | HLA-A*02:01 | 504           | 29             | 0.00074439    | 29            | 0.00074439  | 29          | TRUE         | TRUE              |
| 1     | TMIFDNFAFN | 150   | 158   | 9              | HLA-A*02:01 | 150           | 29             | 0.00074679    | 29            | 0.00074679  | 29          | TRUE         | TRUE              |
| 1     | LTPAWRIYS  | 615   | 623   | 9              | HLA-A*02:01 | 615           | 29             | 0.00074817    | 29            | 0.00074817  | 29          | TRUE         | TRUE              |
| 1     | VNFMFNGLT  | 525   | 533   | 9              | HLA-A*02:01 | 525           | 29             | 0.00075301    | 29            | 0.00075301  | 29          | TRUE         | TRUE              |
| 1     | VFNATKFPS  | 328   | 336   | 9              | HLA-A*02:01 | 328           | 29             | 0.00075492    | 29            | 0.00075492  | 29          | TRUE         | TRUE              |
| 1     | GAGICASYH  | 653   | 661   | 9              | HLA-A*02:01 | 653           | 29             | 0.00075753    | 29            | 0.00075753  | 29          | TRUE         | TRUE              |
| 1     | SLGADSSIA  | 680   | 688   | 9              | HLA-A*02:01 | 680           | 29             | 0.00075858    | 29            | 0.00075858  | 29          | TRUE         | TRUE              |
| 1     | YRFNGIGVT  | 886   | 894   | 9              | HLA-A*02:01 | 886           | 30             | 0.00076454    | 30            | 0.00076454  | 30          | TRUE         | TRUE              |
| 1     | CLKGACSCG  | 1225  | 1233  | 9              | HLA-A*02:01 | 1225          | 30             | 0.0007656     | 30            | 0.0007656   | 30          | TRUE         | TRUE              |
| 1     | CPFGEVFNA  | 323   | 331   | 9              | HLA-A*02:01 | 323           | 30             | 0.00076666    | 30            | 0.00076666  | 30          | TRUE         | TRUE              |
| 1     | GTGVLTSS   | 534   | 542   | 9              | HLA-A*02:01 | 534           | 30             | 0.0007709     | 30            | 0.0007709   | 30          | TRUE         | TRUE              |
| 1     | AYFPREGVF  | 1069  | 1077  | 9              | HLA-A*02:01 | 1069          | 30             | 0.00077304    | 30            | 0.00077304  | 30          | TRUE         | TRUE              |
| 1     | FVFNKNDGF  | 185   | 193   | 9              | HLA-A*02:01 | 185           | 30             | 0.00077625    | 30            | 0.00077625  | 30          | TRUE         | TRUE              |
| 1     | YKGYQPIDV  | 197   | 205   | 9              | HLA-A*02:01 | 197           | 30             | 0.00077625    | 30            | 0.00077625  | 30          | TRUE         | TRUE              |
| 1     | YADSFVVKG  | 383   | 391   | 9              | HLA-A*02:01 | 383           | 30             | 0.0007766     | 30            | 0.0007766   | 30          | TRUE         | TRUE              |
| 1     | STMNKSQS   | 105   | 113   | 9              | HLA-A*02:01 | 105           | 30             | 0.00078705    | 30            | 0.00078705  | 30          | TRUE         | TRUE              |
| 1     | PFFAVSKPM  | 136   | 144   | 9              | HLA-A*02:01 | 136           | 30             | 0.00078832    | 30            | 0.00078832  | 30          | TRUE         | TRUE              |
| 1     | KGYHLMFSP  | 1027  | 1035  | 9              | HLA-A*02:01 | 1027          | 30             | 0.00079086    | 30            | 0.00079086  | 30          | TRUE         | TRUE              |
| 1     | SFIEDLLFN  | 798   | 806   | 9              | HLA-A*02:01 | 798           | 30             | 0.00080002    | 30            | 0.00080002  | 30          | TRUE         | TRUE              |
| 1     | PLGINITNF  | 223   | 231   | 9              | HLA-A*02:01 | 223           | 30             | 0.00080316    | 30            | 0.00080316  | 30          | TRUE         | TRUE              |
| 1     | DVDLGDISG  | 1145  | 1153  | 9              | HLA-A*02:01 | 1145          | 30             | 0.00080575    | 30            | 0.00080575  | 30          | TRUE         | TRUE              |
| 1     | EVAVLYQDV  | 593   | 601   | 9              | HLA-A*02:01 | 593           | 30             | 0.00080724    | 30            | 0.00080724  | 30          | TRUE         | TRUE              |
| 1     | FVGYLKPTT  | 253   | 261   | 9              | HLA-A*02:01 | 253           | 31             | 0.0008147     | 31            | 0.0008147   | 31          | TRUE         | TRUE              |
| 1     | NHFTGNPVI  | 73    | 81    | 9              | HLA-A*02:01 | 73            | 31             | 0.00081546    | 31            | 0.00081546  | 31          | TRUE         | TRUE              |
| 1     | GKYEYQIKW  | 1186  | 1194  | 9              | HLA-A*02:01 | 1186          | 31             | 0.00081979    | 31            | 0.00081979  | 31          | TRUE         | TRUE              |
| 1     | DLLFNKVTL  | 802   | 810   | 9              | HLA-A*02:01 | 802           | 31             | 0.00082073    | 31            | 0.00082073  | 31          | TRUE         | TRUE              |
| 1     | KYVGFNFNS  | 777   | 785   | 9              | HLA-A*02:01 | 777           | 31             | 0.00082073    | 31            | 0.00082073  | 31          | TRUE         | TRUE              |
| 1     | SQILPDPLK  | 785   | 793   | 9              | HLA-A*02:01 | 785           | 31             | 0.00082851    | 31            | 0.00082851  | 31          | TRUE         | TRUE              |
| 1     | KPIFKLPLG  | 217   | 225   | 9              | HLA-A*02:01 | 217           | 31             | 0.00082909    | 31            | 0.00082909  | 31          | TRUE         | TRUE              |
| 1     | VVNQNAQAL  | 933   | 941   | 9              | HLA-A*02:01 | 933           | 31             | 0.00083176    | 31            | 0.00083176  | 31          | TRUE         | TRUE              |
| 1     | IPFKDGIYF  | 81    | 89    | 9              | HLA-A*02:01 | 81            | 31             | 0.00083676    | 31            | 0.00083676  | 31          | TRUE         | TRUE              |
| 1     | FMKQYGECL  | 815   | 823   | 9              | HLA-A*02:01 | 815           | 31             | 0.00083946    | 31            | 0.00083946  | 31          | TRUE         | TRUE              |
| 1     | NTLKPIFKL  | 214   | 222</ |                |             |               |                |               |               |             |             |              |                   |

| seq # | peptide    | start | end  | peptide length | allele      | peptide index | median binding | comblib_sidne | comblib_sidne | legacy IC50 | legacy rank | scores equal | percentiles equal |
|-------|------------|-------|------|----------------|-------------|---------------|----------------|---------------|---------------|-------------|-------------|--------------|-------------------|
| 1     | CGDSTECAN  | 725   | 733  | 9              | HLA-A*02:01 | 725           | 32             | 0.00086338    | 32            | 0.00086338  | 32          | TRUE         | TRUE              |
| 1     | SONPLAELK  | 279   | 287  | 9              | HLA-A*02:01 | 279           | 32             | 0.00086756    | 32            | 0.00086756  | 32          | TRUE         | TRUE              |
| 1     | ERDISNVFP  | 452   | 460  | 9              | HLA-A*02:01 | 452           | 32             | 0.00086976    | 32            | 0.00086976  | 32          | TRUE         | TRUE              |
| 1     | INNSTNVVI  | 117   | 125  | 9              | HLA-A*02:01 | 117           | 32             | 0.00087862    | 32            | 0.00087862  | 32          | TRUE         | TRUE              |
| 1     | YTMISLGADS | 677   | 685  | 9              | HLA-A*02:01 | 677           | 32             | 0.00087902    | 32            | 0.00087902  | 32          | TRUE         | TRUE              |
| 1     | FYTTTGIGY  | 483   | 491  | 9              | HLA-A*02:01 | 483           | 32             | 0.00089166    | 32            | 0.00089166  | 32          | TRUE         | TRUE              |
| 1     | MFIFLLFLT  | 1     | 9    | 9              | HLA-A*02:01 | 1             | 32             | 0.0008931     | 32            | 0.0008931   | 32          | TRUE         | TRUE              |
| 1     | YNYKYRYLR  | 436   | 444  | 9              | HLA-A*02:01 | 436           | 32             | 0.00089578    | 32            | 0.00089578  | 32          | TRUE         | TRUE              |
| 1     | EQYKWPWY   | 1189  | 1197 | 9              | HLA-A*02:01 | 1189          | 32             | 0.00089743    | 32            | 0.00089743  | 32          | TRUE         | TRUE              |
| 1     | DISPCSGGG  | 572   | 580  | 9              | HLA-A*02:01 | 572           | 33             | 0.00090615    | 33            | 0.00090615  | 33          | TRUE         | TRUE              |
| 1     | SEKSGNFKH  | 173   | 181  | 9              | HLA-A*02:01 | 173           | 33             | 0.00091664    | 33            | 0.00091664  | 33          | TRUE         | TRUE              |
| 1     | WVFGSTMMN  | 101   | 109  | 9              | HLA-A*02:01 | 101           | 33             | 0.00091664    | 33            | 0.00091664  | 33          | TRUE         | TRUE              |
| 1     | DVROIAPGQ  | 393   | 401  | 9              | HLA-A*02:01 | 393           | 33             | 0.00091812    | 33            | 0.00091812  | 33          | TRUE         | TRUE              |
| 1     | LGADSIAY   | 681   | 689  | 9              | HLA-A*02:01 | 681           | 33             | 0.00092257    | 33            | 0.00092257  | 33          | TRUE         | TRUE              |
| 1     | VDSYECDI   | 642   | 650  | 9              | HLA-A*02:01 | 642           | 33             | 0.00092555    | 33            | 0.00092555  | 33          | TRUE         | TRUE              |
| 1     | RSTSQKIV   | 667   | 675  | 9              | HLA-A*02:01 | 667           | 33             | 0.0009264     | 33            | 0.0009264   | 33          | TRUE         | TRUE              |
| 1     | TTAPAIHE   | 1058  | 1066 | 9              | HLA-A*02:01 | 1058          | 33             | 0.00093325    | 33            | 0.00093325  | 33          | TRUE         | TRUE              |
| 1     | FHTINHTFG  | 69    | 77   | 9              | HLA-A*02:01 | 69            | 33             | 0.00093411    | 33            | 0.00093411  | 33          | TRUE         | TRUE              |
| 1     | AISSVLNDI  | 954   | 962  | 9              | HLA-A*02:01 | 954           | 33             | 0.00093972    | 33            | 0.00093972  | 33          | TRUE         | TRUE              |
| 1     | PKTSEILDI  | 565   | 573  | 9              | HLA-A*02:01 | 565           | 33             | 0.00094363    | 33            | 0.00094363  | 33          | TRUE         | TRUE              |
| 1     | IPIGAGICA  | 650   | 658  | 9              | HLA-A*02:01 | 650           | 34             | 0.00094755    | 34            | 0.00094755  | 34          | TRUE         | TRUE              |
| 1     | STGNNVFQT  | 623   | 631  | 9              | HLA-A*02:01 | 623           | 34             | 0.0009528     | 34            | 0.0009528   | 34          | TRUE         | TRUE              |
| 1     | TNLCPEGEV  | 320   | 328  | 9              | HLA-A*02:01 | 320           | 34             | 0.00095455    | 34            | 0.00095455  | 34          | TRUE         | TRUE              |
| 1     | GGFNFSQL   | 780   | 788  | 9              | HLA-A*02:01 | 780           | 34             | 0.00095499    | 34            | 0.00095499  | 34          | TRUE         | TRUE              |
| 1     | ENGTTDAV   | 268   | 276  | 9              | HLA-A*02:01 | 268           | 34             | 0.00095675    | 34            | 0.00095675  | 34          | TRUE         | TRUE              |
| 1     | QCVNFNFNG  | 523   | 531  | 9              | HLA-A*02:01 | 523           | 34             | 0.00095808    | 34            | 0.00095808  | 34          | TRUE         | TRUE              |
| 1     | FSNVYADSF  | 379   | 387  | 9              | HLA-A*02:01 | 379           | 34             | 0.00097006    | 34            | 0.00097006  | 34          | TRUE         | TRUE              |
| 1     | SQSVIINN   | 111   | 119  | 9              | HLA-A*02:01 | 111           | 34             | 0.00097096    | 34            | 0.00097096  | 34          | TRUE         | TRUE              |
| 1     | QAPNYTQHT  | 26    | 34   | 9              | HLA-A*02:01 | 26            | 34             | 0.0009732     | 34            | 0.0009732   | 34          | TRUE         | TRUE              |
| 1     | EHVDTSYEC  | 640   | 648  | 9              | HLA-A*02:01 | 640           | 34             | 0.00097432    | 34            | 0.00097432  | 34          | TRUE         | TRUE              |
| 1     | INASVNNIQ  | 1154  | 1162 | 9              | HLA-A*02:01 | 1154          | 34             | 0.00097611    | 34            | 0.00097611  | 34          | TRUE         | TRUE              |
| 1     | RFPNITNLC  | 315   | 323  | 9              | HLA-A*02:01 | 315           | 34             | 0.00097994    | 34            | 0.00097994  | 34          | TRUE         | TRUE              |
| 1     | VYTOQURA   | 989   | 997  | 9              | HLA-A*02:01 | 989           | 34             | 0.00098175    | 34            | 0.00098175  | 34          | TRUE         | TRUE              |
| 1     | KOYGECLGD  | 817   | 825  | 9              | HLA-A*02:01 | 817           | 34             | 0.00099334    | 34            | 0.00099334  | 34          | TRUE         | TRUE              |
| 1     | DAVDCSQNP  | 274   | 282  | 9              | HLA-A*02:01 | 274           | 34             | 0.00099426    | 34            | 0.00099426  | 34          | TRUE         | TRUE              |
| 1     | SVVNIQKEI  | 1157  | 1165 | 9              | HLA-A*02:01 | 1157          | 35             | 0.00100231    | 35            | 0.00100231  | 35          | TRUE         | TRUE              |
| 1     | DQLTPAWRI  | 613   | 621  | 9              | HLA-A*02:01 | 613           | 35             | 0.00100508    | 35            | 0.00100508  | 35          | TRUE         | TRUE              |
| 1     | SSNFGAISS  | 949   | 957  | 9              | HLA-A*02:01 | 949           | 35             | 0.00100647    | 35            | 0.00100647  | 35          | TRUE         | TRUE              |
| 1     | CANLLLOYG  | 731   | 739  | 9              | HLA-A*02:01 | 731           | 35             | 0.00101906    | 35            | 0.00101906  | 35          | TRUE         | TRUE              |
| 1     | FMGCVLAWN  | 416   | 424  | 9              | HLA-A*02:01 | 416           | 35             | 0.00102141    | 35            | 0.00102141  | 35          | TRUE         | TRUE              |
| 1     | SSKRFPQFP  | 541   | 549  | 9              | HLA-A*02:01 | 541           | 35             | 0.0010292     | 35            | 0.0010292   | 35          | TRUE         | TRUE              |
| 1     | NNNTIAIPTN | 691   | 699  | 9              | HLA-A*02:01 | 691           | 35             | 0.00103276    | 35            | 0.00103276  | 35          | TRUE         | TRUE              |
| 1     | ITNFRAILT  | 228   | 236  | 9              | HLA-A*02:01 | 228           | 35             | 0.00103992    | 35            | 0.00103992  | 35          | TRUE         | TRUE              |
| 1     | VLSFELLNA  | 498   | 506  | 9              | HLA-A*02:01 | 498           | 35             | 0.00104232    | 35            | 0.00104232  | 35          | TRUE         | TRUE              |
| 1     | LKCSVKSE   | 286   | 294  | 9              | HLA-A*02:01 | 286           | 35             | 0.00104232    | 35            | 0.00104232  | 35          | TRUE         | TRUE              |
| 1     | VAKNNLSE   | 1171  | 1179 | 9              | HLA-A*02:01 | 1171          | 35             | 0.00104761    | 35            | 0.00104761  | 35          | TRUE         | TRUE              |
| 1     | AEHVDTSYE  | 639   | 647  | 9              | HLA-A*02:01 | 639           | 35             | 0.00105196    | 35            | 0.00105196  | 35          | TRUE         | TRUE              |
| 1     | GYQPYRVVV  | 490   | 498  | 9              | HLA-A*02:01 | 490           | 35             | 0.00105487    | 35            | 0.00105487  | 35          | TRUE         | TRUE              |
| 1     | LFLLTSGS   | 6     | 14   | 9              | HLA-A*02:01 | 6             | 35             | 0.00105657    | 35            | 0.00105657  | 35          | TRUE         | TRUE              |
| 1     | APHGVVFLH  | 1038  | 1046 | 9              | HLA-A*02:01 | 1038          | 35             | 0.00105877    | 35            | 0.00105877  | 35          | TRUE         | TRUE              |
| 1     | PNITNLCPF  | 317   | 325  | 9              | HLA-A*02:01 | 317           | 36             | 0.00106316    | 36            | 0.00106316  | 36          | TRUE         | TRUE              |
| 1     | QKFNGLTVL  | 835   | 843  | 9              | HLA-A*02:01 | 835           | 36             | 0.00106905    | 36            | 0.00106905  | 36          | TRUE         | TRUE              |
| 1     | DVVGIGINN  | 1109  | 1117 | 9              | HLA-A*02:01 | 1109          | 36             | 0.00107498    | 36            | 0.00107498  | 36          | TRUE         | TRUE              |
| 1     | FGEVFNATK  | 325   | 333  | 9              | HLA-A*02:01 | 325           | 36             | 0.00107721    | 36            | 0.00107721  | 36          | TRUE         | TRUE              |
| 1     | NFKHLREFV  | 178   | 186  | 9              | HLA-A*02:01 | 178           | 36             | 0.0010787     | 36            | 0.0010787   | 36          | TRUE         | TRUE              |
| 1     | VITPGTNAS  | 583   | 591  | 9              | HLA-A*02:01 | 583           | 36             | 0.00107895    | 36            | 0.00107895  | 36          | TRUE         | TRUE              |
| 1     | GVTONVLYE  | 892   | 900  | 9              | HLA-A*02:01 | 892           | 36             | 0.00108393    | 36            | 0.00108393  | 36          | TRUE         | TRUE              |
| 1     | KKISNCVAD  | 343   | 351  | 9              | HLA-A*02:01 | 343           | 36             | 0.00108418    | 36            | 0.00108418  | 36          | TRUE         | TRUE              |
| 1     | EVMPVSMAK  | 707   | 715  | 9              | HLA-A*02:01 | 707           | 36             | 0.00108468    | 36            | 0.00108468  | 36          | TRUE         | TRUE              |
| 1     | LQTYVTQQL  | 986   | 994  | 9              | HLA-A*02:01 | 986           | 36             | 0.00108643    | 36            | 0.00108643  | 36          | TRUE         | TRUE              |
| 1     | TLKPIFKLP  | 215   | 223  | 9              | HLA-A*02:01 | 215           | 36             | 0.00108668    | 36            | 0.00108668  | 36          | TRUE         | TRUE              |
| 1     | NYTOHTSSM  | 29    | 37   | 9              | HLA-A*02:01 | 29            | 36             | 0.00109698    | 36            | 0.00109698  | 36          | TRUE         | TRUE              |
| 1     | SFPQAAPHG  | 1033  | 1041 | 9              | HLA-A*02:01 | 1033          | 36             | 0.00110129    | 36            | 0.00110129  | 36          | TRUE         | TRUE              |
| 1     | DLQELGKYE  | 1181  | 1189 | 9              | HLA-A*02:01 | 1181          | 36             | 0.00110459    | 36            | 0.00110459  | 36          | TRUE         | TRUE              |
| 1     | VVIGIINN   | 1110  | 1118 | 9              | HLA-A*02:01 | 1110          | 36             | 0.00110917    | 36            | 0.00110917  | 36          | TRUE         | TRUE              |
| 1     | ESLIDQL    | 1177  | 1185 | 9              | HLA-A*02:01 | 1177          | 36             | 0.00111122    | 36            | 0.00111122  | 36          | TRUE         | TRUE              |
| 1     | GRLOSLQTY  | 981   | 989  | 9              | HLA-A*02:01 | 981           | 36             | 0.00111532    | 36            | 0.00111532  | 36          | TRUE         | TRUE              |
| 1     | RVVPSGDVV  | 306   | 314  | 9              | HLA-A*02:01 | 306           | 37             | 0.00114288    | 37            | 0.00114288  | 37          | TRUE         | TRUE              |
| 1     | SGDVRFPN   | 310   | 318  | 9              | HLA-A*02:01 | 310           | 37             | 0.0011434     | 37            | 0.0011434   | 37          | TRUE         | TRUE              |
| 1     | ASANLAATK  | 1002  | 1010 | 9              | HLA-A*02:01 | 1002          | 37             | 0.00114578    | 37            | 0.00114578  | 37          | TRUE         | TRUE              |
| 1     | DKVEAEVQI  | 967   | 975  | 9              | HLA-A*02:01 | 967           | 37             | 0.00114868    | 37            | 0.00114868  | 37          | TRUE         | TRUE              |
| 1     | VVIRACNF   | 123   | 131  | 9              | HLA-A*02:01 | 123           | 37             | 0.00115345    | 37            | 0.00115345  | 37          | TRUE         | TRUE              |
| 1     | FPNITNLCP  | 316   | 324  | 9              | HLA-A*02:01 | 316           | 37             | 0.00115798    | 37            | 0.00115798  | 37          | TRUE         | TRUE              |
| 1     | GACSGSGCC  | 1228  | 1236 | 9              | HLA-A*02:01 | 1228          | 37             | 0.00116011    | 37            | 0.00116011  | 37          | TRUE         | TRUE              |
| 1     | PFERDISNV  | 450   | 458  | 9              | HLA-A*02:01 | 450           | 37             | 0.00116332    | 37            | 0.00116332  | 37          | TRUE         | TRUE              |
| 1     | SSVLNDILS  | 956   | 964  | 9              | HLA-A*02:01 | 956           | 38             | 0.0011825     | 38            | 0.0011825   | 38          | TRUE         | TRUE              |
| 1     | AALQIPFAM  | 874   | 882  | 9              | HLA-A*02:01 | 874           | 38             | 0.00118359    | 38            | 0.00118359  | 38          | TRUE         | TRUE              |
| 1     | VTGFHTINH  | 66    | 74   | 9              | HLA-A*02:01 | 66            | 38             | 0.00120282    | 38            | 0.00120282  | 38          | TRUE         | TRUE              |
| 1     | PSSKRFPQF  | 540   | 548  | 9              | HLA-A*02:01 | 540           | 38             | 0.00121227    | 38            | 0.00121227  | 38          | TRUE         | TRUE              |
| 1     | NTRVFVAQV  | 759   | 767  | 9              | HLA-A*02:01 | 759           | 38             | 0.00121899    | 38            | 0.00121899  | 38          | TRUE         | TRUE              |
| 1     | NMYICGDS   | 721   | 729  | 9              | HLA-A*02:01 | 721           | 38             | 0.00122462    | 38            | 0.00122462  | 38          | TRUE         | TRUE              |
| 1     | YSTGNNVFO  | 622   | 630  | 9              | HLA-A*02:01 | 622           | 38             | 0.00122603    | 38            | 0.00122603  | 38          | TRUE         | TRUE              |
| 1     | TSAAAYFVG  | 247   | 255  | 9              | HLA-A*02:01 | 247           | 38             | 0.00122687    | 38            | 0.00122687  | 38          | TRUE         | TRUE              |
| 1     | TNFRAILTA  | 229   | 237  | 9              | HLA-A*02:01 | 229           | 39             | 0.0012297     | 39            | 0.0012297   | 39          | TRUE         | TRUE              |
| 1     | LLOYGSFCT  | 735   | 743  | 9              | HLA-A*02:01 | 735           | 39             | 0.0012331     | 39            | 0.0012331   | 39          | TRUE         | TRUE              |
| 1     | NASSEVAVL  | 589   | 597  | 9              | HLA-A*02:01 | 589           | 39             | 0.00123367    | 39            | 0.00123367  | 39          | TRUE         | TRUE              |
| 1     | TPPALNCYW  | 468   | 476  | 9              | HLA-A*02:01 | 468           | 39             | 0.00123396    | 39            | 0.00123396  | 39          | TRUE         | TRUE              |
| 1     | YFAATEKSN  | 88    | 96   | 9              | HLA-A*02:01 | 88            | 39             | 0.00123623    | 39            | 0.00123623  | 39          | TRUE         | TRUE              |
| 1     | GINASVVNI  | 1153  | 1161 | 9              | HLA-A*02:01 | 1153          | 39             | 0.00124165    | 39            | 0.00124165  | 39          | TRUE         | TRUE              |
| 1     | FKHEELKYF  | 1130  | 1138 | 9              | HLA-A*02:01 | 1130          | 39             | 0.00124738    | 39            | 0.00124738  | 39          | TRUE         | TRUE              |
| 1     | LQDVVNQNA  | 930   | 938  | 9              | HLA-A*02:01 | 930           | 39             | 0.00124738    | 39            | 0.00124738  | 39          | TRUE         | TRUE              |
| 1     | NPFFAVSKP  | 135   | 143  | 9              | HLA-A*02:01 | 135           | 39             | 0.0012494     | 39            | 0.0012494   | 39          | TRUE         | TRUE              |
| 1     | RQIAPGQTG  | 395   | 403  | 9              | HLA-A*02:01 | 395           | 39             | 0.00125314    | 39            | 0.00125314  | 39          | TRUE         | TRUE              |
| 1     | VFNSTGWF   | 1078  | 1086 | 9              | HLA-A*02:01 | 1078          | 39             | 0.00127028    | 39            | 0.00127028  | 39          | TRUE         | TRUE              |
| 1     | ESLTTSTA   | 918   | 926  | 9              | HLA-A*02:01 | 918           | 39             | 0.00127585    | 39            | 0.00127585  | 39          | TRUE         | TRUE              |
| 1     | TTSTALGK   | 921   | 929  | 9              | HLA-A       |               |                |               |               |             |             |              |                   |

| seq # | peptide    | start | end  | peptide length | allele      | peptide index | median binding | comblib_sidne | comblib_sidney | legacy IC50 | legacy rank | scores equal | percentiles equal |
|-------|------------|-------|------|----------------|-------------|---------------|----------------|---------------|----------------|-------------|-------------|--------------|-------------------|
| 1     | GDDVRQIAP  | 391   | 399  | 9              | HLA-A*02:01 | 391           | 40             | 0.00130768    | 40             | 0.00130768  | 40          | TRUE         | TRUE              |
| 1     | LDLQELGK   | 1179  | 1187 | 9              | HLA-A*02:01 | 1179          | 40             | 0.00131009    | 40             | 0.00131009  | 40          | TRUE         | TRUE              |
| 1     | CVLGQSKRV  | 1014  | 1022 | 9              | HLA-A*02:01 | 1014          | 40             | 0.00131522    | 40             | 0.00131522  | 40          | TRUE         | TRUE              |
| 1     | YISDAFSLD  | 163   | 171  | 9              | HLA-A*02:01 | 163           | 40             | 0.00131856    | 40             | 0.00131856  | 40          | TRUE         | TRUE              |
| 1     | GVIADYNYK  | 403   | 411  | 9              | HLA-A*02:01 | 403           | 40             | 0.00132221    | 40             | 0.00132221  | 40          | TRUE         | TRUE              |
| 1     | LYNSTFFST  | 355   | 363  | 9              | HLA-A*02:01 | 355           | 41             | 0.00132801    | 41             | 0.00132801  | 41          | TRUE         | TRUE              |
| 1     | QPIDVVRDL  | 201   | 209  | 9              | HLA-A*02:01 | 201           | 41             | 0.00133537    | 41             | 0.00133537  | 41          | TRUE         | TRUE              |
| 1     | YFGGFNF5Q  | 778   | 786  | 9              | HLA-A*02:01 | 778           | 41             | 0.00133537    | 41             | 0.00133537  | 41          | TRUE         | TRUE              |
| 1     | DAGFMKQYG  | 812   | 820  | 9              | HLA-A*02:01 | 812           | 41             | 0.00133783    | 41             | 0.00133783  | 41          | TRUE         | TRUE              |
| 1     | YSVLVNSTF  | 352   | 360  | 9              | HLA-A*02:01 | 352           | 41             | 0.00133906    | 41             | 0.00133906  | 41          | TRUE         | TRUE              |
| 1     | AAAYFVGVL  | 249   | 257  | 9              | HLA-A*02:01 | 249           | 41             | 0.00134338    | 41             | 0.00134338  | 41          | TRUE         | TRUE              |
| 1     | AAATAALVS  | 853   | 861  | 9              | HLA-A*02:01 | 853           | 41             | 0.00134958    | 41             | 0.00134958  | 41          | TRUE         | TRUE              |
| 1     | PSGDVVRFP  | 309   | 317  | 9              | HLA-A*02:01 | 309           | 41             | 0.00136364    | 41             | 0.00136364  | 41          | TRUE         | TRUE              |
| 1     | FKNKDGLY   | 187   | 195  | 9              | HLA-A*02:01 | 187           | 41             | 0.00136773    | 41             | 0.00136773  | 41          | TRUE         | TRUE              |
| 1     | TSNFRVVPs  | 302   | 310  | 9              | HLA-A*02:01 | 302           | 41             | 0.00137658    | 41             | 0.00137658  | 41          | TRUE         | TRUE              |
| 1     | ALNTLVKQL  | 940   | 948  | 9              | HLA-A*02:01 | 940           | 41             | 0.00137721    | 41             | 0.00137721  | 41          | TRUE         | TRUE              |
| 1     | NRALSGIAA  | 746   | 754  | 9              | HLA-A*02:01 | 746           | 42             | 0.00138484    | 42             | 0.00138484  | 42          | TRUE         | TRUE              |
| 1     | QDLFLPFYS  | 56    | 64   | 9              | HLA-A*02:01 | 56            | 42             | 0.00138484    | 42             | 0.00138484  | 42          | TRUE         | TRUE              |
| 1     | FNGIGVTQN  | 888   | 896  | 9              | HLA-A*02:01 | 888           | 42             | 0.00138995    | 42             | 0.00138995  | 42          | TRUE         | TRUE              |
| 1     | KGIQTSNF   | 297   | 305  | 9              | HLA-A*02:01 | 297           | 42             | 0.00140281    | 42             | 0.00140281  | 42          | TRUE         | TRUE              |
| 1     | SVIIHNNST  | 113   | 121  | 9              | HLA-A*02:01 | 113           | 42             | 0.00140281    | 42             | 0.00140281  | 42          | TRUE         | TRUE              |
| 1     | TLKYFGGFN  | 775   | 783  | 9              | HLA-A*02:01 | 775           | 42             | 0.00140346    | 42             | 0.00140346  | 42          | TRUE         | TRUE              |
| 1     | DRLNEVAKN  | 1166  | 1174 | 9              | HLA-A*02:01 | 1166          | 42             | 0.0014054     | 42             | 0.0014054   | 42          | TRUE         | TRUE              |
| 1     | TGTGVLTPS  | 533   | 541  | 9              | HLA-A*02:01 | 533           | 42             | 0.00140929    | 42             | 0.00140929  | 42          | TRUE         | TRUE              |
| 1     | KVEAEVQID  | 968   | 976  | 9              | HLA-A*02:01 | 968           | 42             | 0.00141286    | 42             | 0.00141286  | 42          | TRUE         | TRUE              |
| 1     | IFLLTLTLT  | 3     | 11   | 9              | HLA-A*02:01 | 3             | 42             | 0.00141547    | 42             | 0.00141547  | 42          | TRUE         | TRUE              |
| 1     | EGKAYFPRE  | 1066  | 1074 | 9              | HLA-A*02:01 | 1066          | 42             | 0.00141906    | 42             | 0.00141906  | 42          | TRUE         | TRUE              |
| 1     | NVLVENQKQ  | 896   | 904  | 9              | HLA-A*02:01 | 896           | 42             | 0.00142135    | 42             | 0.00142135  | 42          | TRUE         | TRUE              |
| 1     | VVRGWVFGS  | 97    | 105  | 9              | HLA-A*02:01 | 97            | 42             | 0.00142233    | 42             | 0.00142233  | 42          | TRUE         | TRUE              |
| 1     | TECANLLQL  | 729   | 737  | 9              | HLA-A*02:01 | 729           | 42             | 0.00142462    | 42             | 0.00142462  | 42          | TRUE         | TRUE              |
| 1     | TVLPPLTD   | 841   | 849  | 9              | HLA-A*02:01 | 841           | 42             | 0.00142922    | 42             | 0.00142922  | 42          | TRUE         | TRUE              |
| 1     | NVFGTQAGC  | 627   | 635  | 9              | HLA-A*02:01 | 627           | 42             | 0.00144644    | 42             | 0.00144644  | 42          | TRUE         | TRUE              |
| 1     | KPMGTQHT   | 142   | 150  | 9              | HLA-A*02:01 | 142           | 42             | 0.00145077    | 42             | 0.00145077  | 42          | TRUE         | TRUE              |
| 1     | CDPIGAGI   | 648   | 656  | 9              | HLA-A*02:01 | 648           | 43             | 0.0014669     | 43             | 0.0014669   | 43          | TRUE         | TRUE              |
| 1     | VIHNNSTN   | 114   | 122  | 9              | HLA-A*02:01 | 114           | 43             | 0.00147299    | 43             | 0.00147299  | 43          | TRUE         | TRUE              |
| 1     | LITGRQLS   | 978   | 986  | 9              | HLA-A*02:01 | 978           | 43             | 0.00147571    | 43             | 0.00147571  | 43          | TRUE         | TRUE              |
| 1     | SDLDRCTTF  | 14    | 22   | 9              | HLA-A*02:01 | 14            | 43             | 0.00149417    | 43             | 0.00149417  | 43          | TRUE         | TRUE              |
| 1     | QFNKAISQI  | 908   | 916  | 9              | HLA-A*02:01 | 908           | 43             | 0.0015028     | 43             | 0.0015028   | 43          | TRUE         | TRUE              |
| 1     | IRAAEIRAS  | 995   | 1003 | 9              | HLA-A*02:01 | 995           | 43             | 0.001508      | 43             | 0.001508    | 43          | TRUE         | TRUE              |
| 1     | RACNFECD   | 126   | 134  | 9              | HLA-A*02:01 | 126           | 44             | 0.0015181     | 44             | 0.0015181   | 44          | TRUE         | TRUE              |
| 1     | GAGAAQLIP  | 871   | 879  | 9              | HLA-A*02:01 | 871           | 44             | 0.00153568    | 44             | 0.00153568  | 44          | TRUE         | TRUE              |
| 1     | TDDMIAAYT  | 848   | 856  | 9              | HLA-A*02:01 | 848           | 44             | 0.00154668    | 44             | 0.00154668  | 44          | TRUE         | TRUE              |
| 1     | YRVVVLSEF  | 494   | 502  | 9              | HLA-A*02:01 | 494           | 44             | 0.00155024    | 44             | 0.00155024  | 44          | TRUE         | TRUE              |
| 1     | VSGMCDPVI  | 1104  | 1112 | 9              | HLA-A*02:01 | 1104          | 44             | 0.00155167    | 44             | 0.00155167  | 44          | TRUE         | TRUE              |
| 1     | LHVTYVPSQ  | 1045  | 1053 | 9              | HLA-A*02:01 | 1045          | 44             | 0.00155632    | 44             | 0.00155632  | 44          | TRUE         | TRUE              |
| 1     | DAFSLDVSE  | 166   | 174  | 9              | HLA-A*02:01 | 166           | 44             | 0.0015574     | 44             | 0.0015574   | 44          | TRUE         | TRUE              |
| 1     | NKAISQIQE  | 910   | 918  | 9              | HLA-A*02:01 | 910           | 44             | 0.00155955    | 44             | 0.00155955  | 44          | TRUE         | TRUE              |
| 1     | LSFELNAP   | 499   | 507  | 9              | HLA-A*02:01 | 499           | 44             | 0.00156279    | 44             | 0.00156279  | 44          | TRUE         | TRUE              |
| 1     | AFSLDVSEK  | 167   | 175  | 9              | HLA-A*02:01 | 167           | 44             | 0.00156387    | 44             | 0.00156387  | 44          | TRUE         | TRUE              |
| 1     | QNAQALNTL  | 936   | 944  | 9              | HLA-A*02:01 | 936           | 44             | 0.00156603    | 44             | 0.00156603  | 44          | TRUE         | TRUE              |
| 1     | NFSQILPDP  | 783   | 791  | 9              | HLA-A*02:01 | 783           | 44             | 0.00157036    | 44             | 0.00157036  | 44          | TRUE         | TRUE              |
| 1     | NCVWPLNDY  | 473   | 481  | 9              | HLA-A*02:01 | 473           | 45             | 0.00158271    | 45             | 0.00158271  | 45          | TRUE         | TRUE              |
| 1     | GDINARDU   | 824   | 832  | 9              | HLA-A*02:01 | 824           | 45             | 0.00158271    | 45             | 0.00158271  | 45          | TRUE         | TRUE              |
| 1     | YFREGVVF   | 1070  | 1078 | 9              | HLA-A*02:01 | 1070          | 45             | 0.00158453    | 45             | 0.00158453  | 45          | TRUE         | TRUE              |
| 1     | TEKSNVVRG  | 92    | 100  | 9              | HLA-A*02:01 | 92            | 45             | 0.00159221    | 45             | 0.00159221  | 45          | TRUE         | TRUE              |
| 1     | VLTPSKRRF  | 537   | 545  | 9              | HLA-A*02:01 | 537           | 45             | 0.00159588    | 45             | 0.00159588  | 45          | TRUE         | TRUE              |
| 1     | IKWPVYVWL  | 1192  | 1200 | 9              | HLA-A*02:01 | 1192          | 45             | 0.00161436    | 45             | 0.00161436  | 45          | TRUE         | TRUE              |
| 1     | GPKLSTDL   | 512   | 520  | 9              | HLA-A*02:01 | 512           | 45             | 0.0016278     | 45             | 0.0016278   | 45          | TRUE         | TRUE              |
| 1     | PSQERNFTT  | 1051  | 1059 | 9              | HLA-A*02:01 | 1051          | 45             | 0.00163155    | 45             | 0.00163155  | 45          | TRUE         | TRUE              |
| 1     | QKSIVAYTM  | 671   | 679  | 9              | HLA-A*02:01 | 671           | 45             | 0.00163682    | 45             | 0.00163682  | 45          | TRUE         | TRUE              |
| 1     | SNVPFSPDG  | 456   | 464  | 9              | HLA-A*02:01 | 456           | 46             | 0.00164361    | 46             | 0.00164361  | 46          | TRUE         | TRUE              |
| 1     | IDRLITGRL  | 975   | 983  | 9              | HLA-A*02:01 | 975           | 46             | 0.0016573     | 46             | 0.0016573   | 46          | TRUE         | TRUE              |
| 1     | DLGDISGIN  | 1147  | 1155 | 9              | HLA-A*02:01 | 1147          | 46             | 0.0016573     | 46             | 0.0016573   | 46          | TRUE         | TRUE              |
| 1     | EVFAQVKQM  | 762   | 770  | 9              | HLA-A*02:01 | 762           | 46             | 0.00166341    | 46             | 0.00166341  | 46          | TRUE         | TRUE              |
| 1     | AEQDRNTRE  | 754   | 762  | 9              | HLA-A*02:01 | 754           | 46             | 0.00166725    | 46             | 0.00166725  | 46          | TRUE         | TRUE              |
| 1     | DKYFNKHTS  | 1135  | 1143 | 9              | HLA-A*02:01 | 1135          | 46             | 0.00166802    | 46             | 0.00166802  | 46          | TRUE         | TRUE              |
| 1     | DMIAAYTAA  | 850   | 858  | 9              | HLA-A*02:01 | 850           | 46             | 0.00166802    | 46             | 0.00166802  | 46          | TRUE         | TRUE              |
| 1     | KWPVYVWVLG | 1193  | 1201 | 9              | HLA-A*02:01 | 1193          | 46             | 0.0016734     | 46             | 0.0016734   | 46          | TRUE         | TRUE              |
| 1     | ITTEVMPVS  | 704   | 712  | 9              | HLA-A*02:01 | 704           | 46             | 0.00167494    | 46             | 0.00167494  | 46          | TRUE         | TRUE              |
| 1     | QYGECLGDI  | 818   | 826  | 9              | HLA-A*02:01 | 818           | 46             | 0.00167958    | 46             | 0.00167958  | 46          | TRUE         | TRUE              |
| 1     | HTSSMRGVY  | 33    | 41   | 9              | HLA-A*02:01 | 33            | 46             | 0.00167958    | 46             | 0.00167958  | 46          | TRUE         | TRUE              |
| 1     | GLITGTGLVT | 531   | 539  | 9              | HLA-A*02:01 | 531           | 46             | 0.00168267    | 46             | 0.00168267  | 46          | TRUE         | TRUE              |
| 1     | FGAISSVLN  | 952   | 960  | 9              | HLA-A*02:01 | 952           | 46             | 0.00169122    | 46             | 0.00169122  | 46          | TRUE         | TRUE              |
| 1     | YHLMSPFOA  | 1029  | 1037 | 9              | HLA-A*02:01 | 1029          | 46             | 0.001692      | 46             | 0.001692    | 46          | TRUE         | TRUE              |
| 1     | KGDVVRQIA  | 390   | 398  | 9              | HLA-A*02:01 | 390           | 46             | 0.00169434    | 46             | 0.00169434  | 46          | TRUE         | TRUE              |
| 1     | QPYRVVVLs  | 492   | 500  | 9              | HLA-A*02:01 | 492           | 46             | 0.00169668    | 46             | 0.00169668  | 46          | TRUE         | TRUE              |
| 1     | YKLPDFDFMG | 410   | 418  | 9              | HLA-A*02:01 | 410           | 46             | 0.00169824    | 46             | 0.00169824  | 46          | TRUE         | TRUE              |
| 1     | GECLGDINA  | 820   | 828  | 9              | HLA-A*02:01 | 820           | 46             | 0.00170216    | 46             | 0.00170216  | 46          | TRUE         | TRUE              |
| 1     | TFGAGAAALQ | 869   | 877  | 9              | HLA-A*02:01 | 869           | 46             | 0.00170451    | 46             | 0.00170451  | 46          | TRUE         | TRUE              |
| 1     | DDVRQIAPG  | 392   | 400  | 9              | HLA-A*02:01 | 392           | 46             | 0.00170844    | 46             | 0.00170844  | 46          | TRUE         | TRUE              |
| 1     | SIAYSNNTI  | 686   | 694  | 9              | HLA-A*02:01 | 686           | 47             | 0.00171002    | 47             | 0.00171002  | 47          | TRUE         | TRUE              |
| 1     | KEELDKYFK  | 1131  | 1139 | 9              | HLA-A*02:01 | 1131          | 47             | 0.0017112     | 47             | 0.0017112   | 47          | TRUE         | TRUE              |
| 1     | AYTAALVSG  | 854   | 862  | 9              | HLA-A*02:01 | 854           | 47             | 0.00171475    | 47             | 0.00171475  | 47          | TRUE         | TRUE              |
| 1     | KRFQFPQQF  | 543   | 551  | 9              | HLA-A*02:01 | 543           | 47             | 0.00171554    | 47             | 0.00171554  | 47          | TRUE         | TRUE              |
| 1     | YWPLNDYGF  | 475   | 483  | 9              | HLA-A*02:01 | 475           | 47             | 0.00172822    | 47             | 0.00172822  | 47          | TRUE         | TRUE              |
| 1     | RLITGRQLS  | 977   | 985  | 9              | HLA-A*02:01 | 977           | 47             | 0.00172982    | 47             | 0.00172982  | 47          | TRUE         | TRUE              |
| 1     | LRHGKLRPF  | 443   | 451  | 9              | HLA-A*02:01 | 443           | 47             | 0.00173141    | 47             | 0.00173141  | 47          | TRUE         | TRUE              |
| 1     | YFVGYLKPT  | 252   | 260  | 9              | HLA-A*02:01 | 252           | 47             | 0.0017374     | 47             | 0.0017374   | 47          | TRUE         | TRUE              |
| 1     | EELDKYFKN  | 1132  | 1140 | 9              | HLA-A*02:01 | 1132          | 47             | 0.00174663    | 47             | 0.00174663  | 47          | TRUE         | TRUE              |
| 1     | ASVVNIQKE  | 1156  | 1164 | 9              | HLA-A*02:01 | 1156          | 47             | 0.00174904    | 47             | 0.00174904  | 47          | TRUE         | TRUE              |
| 1     | PTTFMLKYD  | 259   | 267  | 9              | HLA-A*02:01 | 259           | 47             | 0.00175752    | 47             | 0.00175752  | 47          | TRUE         | TRUE              |
| 1     | VTVPSPQER  | 1047  | 1055 | 9              | HLA-A*02:01 | 1047          | 47             | 0.00177174    | 47             | 0.00177174  | 47          | TRUE         | TRUE              |
| 1     | NNVFQTOAG  | 626   | 634  | 9              | HLA-A*02:01 | 626           | 47             | 0.00177337    | 47             | 0.00177337  | 47          | TRUE         | TRUE              |
| 1     | INARDLICA  | 826   | 834  | 9              | HLA-A*02:01 | 826           | 48             | 0.00179391    | 48             | 0.00179391  | 48          | TRUE         | TRUE              |
| 1     | TYVPSQERN  | 1048  | 1056 | 9              | HLA-A*02:01 | 1048          | 48             | 0.00180053    | 48             | 0.00180053  | 48          | TRUE         | TRUE              |
|       |            |       |      |                |             |               |                |               |                |             |             |              |                   |

| seq # | peptide    | start | end  | peptide length | allele      | peptide index | median binding | comblib_sidne | comblib_sidne | legacy IC50 | legacy rank | scores equal | percentiles equal |
|-------|------------|-------|------|----------------|-------------|---------------|----------------|---------------|---------------|-------------|-------------|--------------|-------------------|
| 1     | AQKFNGLTV  | 834   | 842  | 9              | HLA-A*02:01 | 834           | 49             | 0.00187932    | 49            | 0.00187932  | 49          | TRUE         | TRUE              |
| 1     | GFNFSGQILP | 781   | 789  | 9              | HLA-A*02:01 | 781           | 49             | 0.00187932    | 49            | 0.00187932  | 49          | TRUE         | TRUE              |
| 1     | RHGKLRPFE  | 444   | 452  | 9              | HLA-A*02:01 | 444           | 49             | 0.00189845    | 49            | 0.00189845  | 49          | TRUE         | TRUE              |
| 1     | IFDNAFNCT  | 152   | 160  | 9              | HLA-A*02:01 | 152           | 49             | 0.00190941    | 49            | 0.00190941  | 49          | TRUE         | TRUE              |
| 1     | ECLGDINAR  | 821   | 829  | 9              | HLA-A*02:01 | 821           | 49             | 0.00191337    | 49            | 0.00191337  | 49          | TRUE         | TRUE              |
| 1     | KFNGLTVLP  | 836   | 844  | 9              | HLA-A*02:01 | 836           | 49             | 0.00191867    | 49            | 0.00191867  | 49          | TRUE         | TRUE              |
| 1     | NGLTGTGVL  | 530   | 538  | 9              | HLA-A*02:01 | 530           | 49             | 0.00192309    | 49            | 0.00192309  | 49          | TRUE         | TRUE              |
| 1     | NEVAKNLNE  | 1169  | 1177 | 9              | HLA-A*02:01 | 1169          | 49             | 0.00192752    | 49            | 0.00192752  | 49          | TRUE         | TRUE              |
| 1     | VGYLKPTTF  | 254   | 262  | 9              | HLA-A*02:01 | 254           | 49             | 0.00192752    | 49            | 0.00192752  | 49          | TRUE         | TRUE              |
| 1     | QESLTTST   | 917   | 925  | 9              | HLA-A*02:01 | 917           | 49             | 0.00193197    | 49            | 0.00193197  | 49          | TRUE         | TRUE              |
| 1     | QERNFTTAP  | 1053  | 1061 | 9              | HLA-A*02:01 | 1053          | 49             | 0.00194581    | 49            | 0.00194581  | 49          | TRUE         | TRUE              |
| 1     | LNESLIDLO  | 1175  | 1183 | 9              | HLA-A*02:01 | 1175          | 49             | 0.00195209    | 49            | 0.00195209  | 49          | TRUE         | TRUE              |
| 1     | RNFFSPQII  | 1089  | 1097 | 9              | HLA-A*02:01 | 1089          | 50             | 0.00198518    | 50            | 0.00198518  | 50          | TRUE         | TRUE              |
| 1     | SISITTEVM  | 701   | 709  | 9              | HLA-A*02:01 | 701           | 50             | 0.00198609    | 50            | 0.00198609  | 50          | TRUE         | TRUE              |
| 1     | SKPMGTQTH  | 141   | 149  | 9              | HLA-A*02:01 | 141           | 50             | 0.00199618    | 50            | 0.00199618  | 50          | TRUE         | TRUE              |
| 1     | GIAAEGDRN  | 751   | 759  | 9              | HLA-A*02:01 | 751           | 50             | 0.00200078    | 50            | 0.00200078  | 50          | TRUE         | TRUE              |
| 1     | VADYSVLVN  | 349   | 357  | 9              | HLA-A*02:01 | 349           | 50             | 0.00201094    | 50            | 0.00201094  | 50          | TRUE         | TRUE              |
| 1     | PIGAGICAS  | 651   | 659  | 9              | HLA-A*02:01 | 651           | 50             | 0.0020128     | 50            | 0.0020128   | 50          | TRUE         | TRUE              |
| 1     | ALQIPFAMQ  | 875   | 883  | 9              | HLA-A*02:01 | 875           | 50             | 0.00203095    | 50            | 0.00203095  | 50          | TRUE         | TRUE              |
| 1     | SVLYNSTFF  | 353   | 361  | 9              | HLA-A*02:01 | 353           | 50             | 0.00203236    | 50            | 0.00203236  | 50          | TRUE         | TRUE              |
| 1     | LOELGKYEQ  | 1182  | 1190 | 9              | HLA-A*02:01 | 1182          | 50             | 0.00203564    | 50            | 0.00203564  | 50          | TRUE         | TRUE              |
| 1     | NASVVNIQK  | 1155  | 1163 | 9              | HLA-A*02:01 | 1155          | 50             | 0.00203939    | 50            | 0.00203939  | 50          | TRUE         | TRUE              |
| 1     | PIFKPLGI   | 218   | 226  | 9              | HLA-A*02:01 | 218           | 50             | 0.0020408     | 50            | 0.0020408   | 50          | TRUE         | TRUE              |
| 1     | LKVFGGFNF  | 776   | 784  | 9              | HLA-A*02:01 | 776           | 50             | 0.00204174    | 50            | 0.00204174  | 50          | TRUE         | TRUE              |
| 1     | VVLSFELL   | 496   | 504  | 9              | HLA-A*02:01 | 496           | 50             | 0.00204174    | 50            | 0.00204174  | 50          | TRUE         | TRUE              |
| 1     | LQYGSFCTQ  | 736   | 744  | 9              | HLA-A*02:01 | 736           | 51             | 0.00205921    | 51            | 0.00205921  | 51          | TRUE         | TRUE              |
| 1     | LNIDYGFYTT | 478   | 486  | 9              | HLA-A*02:01 | 478           | 51             | 0.00206443    | 51            | 0.00206443  | 51          | TRUE         | TRUE              |
| 1     | QLTPAWRIY  | 614   | 622  | 9              | HLA-A*02:01 | 614           | 51             | 0.00206538    | 51            | 0.00206538  | 51          | TRUE         | TRUE              |
| 1     | LYQDVNCTD  | 597   | 605  | 9              | HLA-A*02:01 | 597           | 51             | 0.00206681    | 51            | 0.00206681  | 51          | TRUE         | TRUE              |
| 1     | WPLNDYGFY  | 476   | 484  | 9              | HLA-A*02:01 | 476           | 51             | 0.00207778    | 51            | 0.00207778  | 51          | TRUE         | TRUE              |
| 1     | MAYRFRNGIG | 884   | 892  | 9              | HLA-A*02:01 | 884           | 51             | 0.00208065    | 51            | 0.00208065  | 51          | TRUE         | TRUE              |
| 1     | LQPELDSFK  | 1123  | 1131 | 9              | HLA-A*02:01 | 1123          | 51             | 0.00208113    | 51            | 0.00208113  | 51          | TRUE         | TRUE              |
| 1     | EVAKNLNE   | 1170  | 1178 | 9              | HLA-A*02:01 | 1170          | 51             | 0.00208449    | 51            | 0.00208449  | 51          | TRUE         | TRUE              |
| 1     | PVIFPKDGI  | 79    | 87   | 9              | HLA-A*02:01 | 79            | 51             | 0.00209315    | 51            | 0.00209315  | 51          | TRUE         | TRUE              |
| 1     | NTIAPTNF   | 692   | 700  | 9              | HLA-A*02:01 | 692           | 51             | 0.00209411    | 51            | 0.00209411  | 51          | TRUE         | TRUE              |
| 1     | TGNNVFQTQ  | 624   | 632  | 9              | HLA-A*02:01 | 624           | 51             | 0.00211203    | 51            | 0.00211203  | 51          | TRUE         | TRUE              |
| 1     | PATVCGPKL  | 507   | 515  | 9              | HLA-A*02:01 | 507           | 51             | 0.00211349    | 51            | 0.00211349  | 51          | TRUE         | TRUE              |
| 1     | SAAAYFVG   | 248   | 256  | 9              | HLA-A*02:01 | 248           | 51             | 0.00211934    | 51            | 0.00211934  | 51          | TRUE         | TRUE              |
| 1     | AWNTRNIDA  | 422   | 430  | 9              | HLA-A*02:01 | 422           | 51             | 0.00212618    | 51            | 0.00212618  | 51          | TRUE         | TRUE              |
| 1     | TTIGIGQPY  | 486   | 494  | 9              | HLA-A*02:01 | 486           | 51             | 0.00212814    | 51            | 0.00212814  | 51          | TRUE         | TRUE              |
| 1     | GDVVRFPNI  | 311   | 319  | 9              | HLA-A*02:01 | 311           | 52             | 0.00213501    | 52            | 0.00213501  | 52          | TRUE         | TRUE              |
| 1     | RDLPSGFNT  | 207   | 215  | 9              | HLA-A*02:01 | 207           | 52             | 0.00213501    | 52            | 0.00213501  | 52          | TRUE         | TRUE              |
| 1     | ELDKYFNKH  | 1133  | 1141 | 9              | HLA-A*02:01 | 1133          | 52             | 0.00214882    | 52            | 0.00214882  | 52          | TRUE         | TRUE              |
| 1     | SCLKGACSC  | 1224  | 1232 | 9              | HLA-A*02:01 | 1224          | 52             | 0.00215625    | 52            | 0.00215625  | 52          | TRUE         | TRUE              |
| 1     | GINITNFRA  | 225   | 233  | 9              | HLA-A*02:01 | 225           | 52             | 0.00215774    | 52            | 0.00215774  | 52          | TRUE         | TRUE              |
| 1     | PGQTGVIAID | 399   | 407  | 9              | HLA-A*02:01 | 399           | 52             | 0.00216222    | 52            | 0.00216222  | 52          | TRUE         | TRUE              |
| 1     | FCGKGYYHLM | 1024  | 1032 | 9              | HLA-A*02:01 | 1024          | 52             | 0.00216471    | 52            | 0.00216471  | 52          | TRUE         | TRUE              |
| 1     | YEYQIKWPW  | 1188  | 1196 | 9              | HLA-A*02:01 | 1188          | 52             | 0.0021712     | 52            | 0.0021712   | 52          | TRUE         | TRUE              |
| 1     | FNKVTLADA  | 805   | 813  | 9              | HLA-A*02:01 | 805           | 52             | 0.00217671    | 52            | 0.00217671  | 52          | TRUE         | TRUE              |
| 1     | PDDFMGCVL  | 413   | 421  | 9              | HLA-A*02:01 | 413           | 52             | 0.00221411    | 52            | 0.00221411  | 52          | TRUE         | TRUE              |
| 1     | GQSKRVDFC  | 1017  | 1025 | 9              | HLA-A*02:01 | 1017          | 52             | 0.00221973    | 52            | 0.00221973  | 52          | TRUE         | TRUE              |
| 1     | QALNTLVKQ  | 939   | 947  | 9              | HLA-A*02:01 | 939           | 52             | 0.0022228     | 52            | 0.0022228   | 52          | TRUE         | TRUE              |
| 1     | VVRDLPSGF  | 205   | 213  | 9              | HLA-A*02:01 | 205           | 52             | 0.00222331    | 52            | 0.00222331  | 52          | TRUE         | TRUE              |
| 1     | YRYLRHGKL  | 440   | 448  | 9              | HLA-A*02:01 | 440           | 52             | 0.00223049    | 52            | 0.00223049  | 52          | TRUE         | TRUE              |
| 1     | RASANLAAT  | 1001  | 1009 | 9              | HLA-A*02:01 | 1001          | 52             | 0.0022346     | 52            | 0.0022346   | 52          | TRUE         | TRUE              |
| 1     | FFSTFKCYG  | 360   | 368  | 9              | HLA-A*02:01 | 360           | 52             | 0.00223821    | 52            | 0.00223821  | 52          | TRUE         | TRUE              |
| 1     | PVSMAKTSV  | 710   | 718  | 9              | HLA-A*02:01 | 710           | 52             | 0.00224285    | 52            | 0.00224285  | 52          | TRUE         | TRUE              |
| 1     | TITDAVDCS  | 271   | 279  | 9              | HLA-A*02:01 | 271           | 53             | 0.00224388    | 53            | 0.00224388  | 53          | TRUE         | TRUE              |
| 1     | ELKCSVKFS  | 285   | 293  | 9              | HLA-A*02:01 | 285           | 53             | 0.00225944    | 53            | 0.00225944  | 53          | TRUE         | TRUE              |
| 1     | LCPFGEVFN  | 322   | 330  | 9              | HLA-A*02:01 | 322           | 53             | 0.00226778    | 53            | 0.00226778  | 53          | TRUE         | TRUE              |
| 1     | GFYTTTGIG  | 482   | 490  | 9              | HLA-A*02:01 | 482           | 53             | 0.00227457    | 53            | 0.00227457  | 53          | TRUE         | TRUE              |
| 1     | LKGACSCGS  | 1226  | 1234 | 9              | HLA-A*02:01 | 1226          | 53             | 0.00228034    | 53            | 0.00228034  | 53          | TRUE         | TRUE              |
| 1     | VVRFPNITN  | 313   | 321  | 9              | HLA-A*02:01 | 313           | 53             | 0.00228139    | 53            | 0.00228139  | 53          | TRUE         | TRUE              |
| 1     | KSFEIDKGI  | 291   | 299  | 9              | HLA-A*02:01 | 291           | 53             | 0.00228981    | 53            | 0.00228981  | 53          | TRUE         | TRUE              |
| 1     | TTDNTFVSG  | 1098  | 1106 | 9              | HLA-A*02:01 | 1098          | 53             | 0.00229087    | 53            | 0.00229087  | 53          | TRUE         | TRUE              |
| 1     | AIHADQLTP  | 609   | 617  | 9              | HLA-A*02:01 | 609           | 53             | 0.0022914     | 53            | 0.0022914   | 53          | TRUE         | TRUE              |
| 1     | EDDSPEVLK  | 1240  | 1248 | 9              | HLA-A*02:01 | 1240          | 53             | 0.00229985    | 53            | 0.00229985  | 53          | TRUE         | TRUE              |
| 1     | MNNKSQSVI  | 107   | 115  | 9              | HLA-A*02:01 | 107           | 53             | 0.002311      | 53            | 0.002311    | 53          | TRUE         | TRUE              |
| 1     | TATAGWTFG  | 863   | 871  | 9              | HLA-A*02:01 | 863           | 53             | 0.00232381    | 53            | 0.00232381  | 53          | TRUE         | TRUE              |
| 1     | PLKPTKRFS  | 791   | 799  | 9              | HLA-A*02:01 | 791           | 53             | 0.00232702    | 53            | 0.00232702  | 53          | TRUE         | TRUE              |
| 1     | EIDRLNEVA  | 1164  | 1172 | 9              | HLA-A*02:01 | 1164          | 53             | 0.00233346    | 53            | 0.00233346  | 53          | TRUE         | TRUE              |
| 1     | TMSLGADSS  | 678   | 686  | 9              | HLA-A*02:01 | 678           | 53             | 0.00233346    | 53            | 0.00233346  | 53          | TRUE         | TRUE              |
| 1     | ITDAVDCSG  | 272   | 280  | 9              | HLA-A*02:01 | 272           | 53             | 0.00234261    | 53            | 0.00234261  | 53          | TRUE         | TRUE              |
| 1     | ATSDGNNY   | 430   | 438  | 9              | HLA-A*02:01 | 430           | 53             | 0.00234423    | 53            | 0.00234423  | 53          | TRUE         | TRUE              |
| 1     | DLPQLPELDS | 1121  | 1129 | 9              | HLA-A*02:01 | 1121          | 54             | 0.00234855    | 54            | 0.00234855  | 54          | TRUE         | TRUE              |
| 1     | ECANLLLOQ  | 730   | 738  | 9              | HLA-A*02:01 | 730           | 54             | 0.0023518     | 54            | 0.0023518   | 54          | TRUE         | TRUE              |
| 1     | DVNVNQNAQA | 932   | 940  | 9              | HLA-A*02:01 | 932           | 54             | 0.00236701    | 54            | 0.00236701  | 54          | TRUE         | TRUE              |
| 1     | PLTTDDMIA  | 845   | 853  | 9              | HLA-A*02:01 | 845           | 54             | 0.00237028    | 54            | 0.00237028  | 54          | TRUE         | TRUE              |
| 1     | PELDSFKEE  | 1125  | 1133 | 9              | HLA-A*02:01 | 1125          | 54             | 0.00238671    | 54            | 0.00238671  | 54          | TRUE         | TRUE              |
| 1     | NQNAQALNT  | 935   | 943  | 9              | HLA-A*02:01 | 935           | 54             | 0.00238781    | 54            | 0.00238781  | 54          | TRUE         | TRUE              |
| 1     | DNAFNCTFE  | 154   | 162  | 9              | HLA-A*02:01 | 154           | 54             | 0.00238781    | 54            | 0.00238781  | 54          | TRUE         | TRUE              |
| 1     | NARDLICAQ  | 827   | 835  | 9              | HLA-A*02:01 | 827           | 54             | 0.00239828    | 54            | 0.00239828  | 54          | TRUE         | TRUE              |
| 1     | TAPACHIEG  | 1059  | 1067 | 9              | HLA-A*02:01 | 1059          | 54             | 0.00239994    | 5.40E+01      | 2.40E-03    | 54          | TRUE         | TRUE              |
| 1     | HTMIFDNFA  | 149   | 157  | 9              | HLA-A*02:01 | 149           | 54             | 0.00241657    | 5.40E+01      | 2.42E-03    | 54          | TRUE         | TRUE              |
| 1     | APATVCGPK  | 506   | 514  | 9              | HLA-A*02:01 | 506           | 54             | 0.00242605    | 5.40E+01      | 2.43E-03    | 54          | TRUE         | TRUE              |
| 1     | PCSFGGVSV  | 575   | 583  | 9              | HLA-A*02:01 | 575           | 54             | 0.00242773    | 5.40E+01      | 2.43E-03    | 54          | TRUE         | TRUE              |
| 1     | SGTATAGWT  | 861   | 869  | 9              | HLA-A*02:01 | 861           | 54             | 0.0024322     | 5.40E+01      | 2.43E-03    | 54          | TRUE         | TRUE              |
| 1     | STSQKSIVA  | 668   | 676  | 9              | HLA-A*02:01 | 668           | 55             | 0.00246604    | 5.50E+01      | 2.47E-03    | 55          | TRUE         | TRUE              |
| 1     | GVFVFNSTG  | 1075  | 1083 | 9              | HLA-A*02:01 | 1075          | 55             | 0.00248313    | 5.50E+01      | 2.48E-03    | 55          | TRUE         | TRUE              |
| 1     | DVVRDLPSG  | 204   | 212  | 9              | HLA-A*02:01 | 204           | 55             | 0.00249       | 5.50E+01      | 2.49E-03    | 55          | TRUE         | TRUE              |
| 1     | DPKTSILD   | 564   | 572  | 9              | HLA-A*02:01 | 564           | 55             | 0.00251131    | 5.50E+01      | 2.51E-03    | 55          | TRUE         | TRUE              |
| 1     | LADAGFMKQ  | 810   | 818  | 9              | HLA-A*02:01 | 810           | 55             | 0.0025229     | 5.50E+01      | 2.52E-03    | 55          | TRUE         | TRUE              |
| 1     | ICAQKFNGL  | 832   | 840  | 9              | HLA-A*02:01 | 832           | 56             | 0.00256094    | 5.60E+01      | 2.56E-03    | 56          | TRUE         | TRUE              |
| 1     | QMYKPTLTK  | 769   | 777  | 9              | HLA-A*02:01 | 769           | 56             | 0.00256626    | 5.60E+01      | 2.57E-03    | 56          | TRUE         | TRUE              |
| 1     | FVVKGDDVR  | 387   | 395  | 9              | HLA-A*02:01 | 387           | 56             | 0.00257276    | 5.60E+01      | 2.57E-03    | 56          | TRUE         | TRUE              |
| 1     | DRNTREFFA  | 757   |      |                |             |               |                |               |               |             |             |              |                   |

| seq # | peptide    | start | end  | peptide length | allele      | peptide index | median binding | comblib_sidne | comblib_sidne | legacy IC50 | legacy rank | scores equal | percentiles equal |
|-------|------------|-------|------|----------------|-------------|---------------|----------------|---------------|---------------|-------------|-------------|--------------|-------------------|
| 1     | AAPHGCVFL  | 1037  | 1045 | 9              | HLA-A*02:01 | 1037          | 56             | 0.00264363    | 5.60E+01      | 2.64E-03    | 56          | TRUE         | TRUE              |
| 1     | IAPGQTGVI  | 397   | 405  | 9              | HLA-A*02:01 | 397           | 56             | 0.00264363    | 5.60E+01      | 2.64E-03    | 56          | TRUE         | TRUE              |
| 1     | NAPATVCGP  | 505   | 513  | 9              | HLA-A*02:01 | 505           | 56             | 0.00264423    | 5.60E+01      | 2.64E-03    | 56          | TRUE         | TRUE              |
| 1     | ISNVFSPD   | 455   | 463  | 9              | HLA-A*02:01 | 455           | 57             | 0.00267855    | 5.70E+01      | 2.68E-03    | 57          | TRUE         | TRUE              |
| 1     | KFDEDDSEP  | 1237  | 1245 | 9              | HLA-A*02:01 | 1237          | 57             | 0.00271019    | 5.70E+01      | 2.71E-03    | 57          | TRUE         | TRUE              |
| 1     | WTFGAGAAL  | 868   | 876  | 9              | HLA-A*02:01 | 868           | 57             | 0.0027227     | 5.70E+01      | 2.72E-03    | 57          | TRUE         | TRUE              |
| 1     | SGINASVVN  | 1152  | 1160 | 9              | HLA-A*02:01 | 1152          | 57             | 0.00274284    | 5.70E+01      | 2.74E-03    | 57          | TRUE         | TRUE              |
| 1     | NQCVNFNFN  | 522   | 530  | 9              | HLA-A*02:01 | 522           | 57             | 0.0027555     | 5.70E+01      | 2.76E-03    | 57          | TRUE         | TRUE              |
| 1     | DSFKEELD   | 1128  | 1136 | 9              | HLA-A*02:01 | 1128          | 57             | 0.00276249    | 5.70E+01      | 2.76E-03    | 57          | TRUE         | TRUE              |
| 1     | DDVQAPNYT  | 23    | 31   | 9              | HLA-A*02:01 | 23            | 57             | 0.00278997    | 5.70E+01      | 2.79E-03    | 57          | TRUE         | TRUE              |
| 1     | SSIAYSNNT  | 685   | 693  | 9              | HLA-A*02:01 | 685           | 57             | 0.00279126    | 5.70E+01      | 2.79E-03    | 57          | TRUE         | TRUE              |
| 1     | YSNNITAIPI | 689   | 697  | 9              | HLA-A*02:01 | 689           | 57             | 0.0027919     | 5.70E+01      | 2.79E-03    | 57          | TRUE         | TRUE              |
| 1     | MGCVLAWNT  | 417   | 425  | 9              | HLA-A*02:01 | 417           | 57             | 0.00279254    | 5.70E+01      | 2.79E-03    | 57          | TRUE         | TRUE              |
| 1     | AGICASYHT  | 654   | 662  | 9              | HLA-A*02:01 | 654           | 57             | 0.00279254    | 5.70E+01      | 2.79E-03    | 57          | TRUE         | TRUE              |
| 1     | GKLQDVVNQ  | 928   | 936  | 9              | HLA-A*02:01 | 928           | 58             | 0.00279705    | 5.80E+01      | 2.80E-03    | 58          | TRUE         | TRUE              |
| 1     | KCFDEDDSE  | 1236  | 1244 | 9              | HLA-A*02:01 | 1236          | 58             | 0.00280543    | 5.80E+01      | 2.81E-03    | 58          | TRUE         | TRUE              |
| 1     | ASSEVAVLY  | 590   | 598  | 9              | HLA-A*02:01 | 590           | 58             | 0.00281061    | 5.80E+01      | 2.81E-03    | 58          | TRUE         | TRUE              |
| 1     | PQIITDNT   | 1094  | 1102 | 9              | HLA-A*02:01 | 1094          | 58             | 0.00283009    | 5.80E+01      | 2.83E-03    | 58          | TRUE         | TRUE              |
| 1     | ITTFMLKYDE | 260   | 268  | 9              | HLA-A*02:01 | 260           | 58             | 0.00283139    | 5.80E+01      | 2.83E-03    | 58          | TRUE         | TRUE              |
| 1     | YKPTLKYF   | 771   | 779  | 9              | HLA-A*02:01 | 771           | 58             | 0.00283792    | 5.80E+01      | 2.84E-03    | 58          | TRUE         | TRUE              |
| 1     | IGAEHVDTIS | 637   | 645  | 9              | HLA-A*02:01 | 637           | 58             | 0.00283792    | 5.80E+01      | 2.84E-03    | 58          | TRUE         | TRUE              |
| 1     | CVADYSVLY  | 348   | 356  | 9              | HLA-A*02:01 | 348           | 58             | 0.00287078    | 5.80E+01      | 2.87E-03    | 58          | TRUE         | TRUE              |
| 1     | IGAGICASY  | 652   | 660  | 9              | HLA-A*02:01 | 652           | 58             | 0.00287774    | 5.80E+01      | 2.88E-03    | 58          | TRUE         | TRUE              |
| 1     | YVPSQERNF  | 1049  | 1057 | 9              | HLA-A*02:01 | 1049          | 58             | 0.00288403    | 5.80E+01      | 2.88E-03    | 58          | TRUE         | TRUE              |
| 1     | IANQFNKAI  | 905   | 913  | 9              | HLA-A*02:01 | 905           | 59             | 0.00293224    | 5.90E+01      | 2.93E-03    | 59          | TRUE         | TRUE              |
| 1     | RVVLSFEL   | 495   | 503  | 9              | HLA-A*02:01 | 495           | 59             | 0.00293765    | 5.90E+01      | 2.94E-03    | 59          | TRUE         | TRUE              |
| 1     | QRNFFSPQI  | 1088  | 1096 | 9              | HLA-A*02:01 | 1088          | 59             | 0.00294713    | 5.90E+01      | 2.95E-03    | 59          | TRUE         | TRUE              |
| 1     | GTSWFITQR  | 1081  | 1089 | 9              | HLA-A*02:01 | 1081          | 59             | 0.00296074    | 5.90E+01      | 2.96E-03    | 59          | TRUE         | TRUE              |
| 1     | SANLAATKM  | 1003  | 1011 | 9              | HLA-A*02:01 | 1003          | 59             | 0.00297303    | 5.90E+01      | 2.97E-03    | 59          | TRUE         | TRUE              |
| 1     | VTILLCCMT  | 1212  | 1220 | 9              | HLA-A*02:01 | 1212          | 59             | 0.00298538    | 5.90E+01      | 2.99E-03    | 59          | TRUE         | TRUE              |
| 1     | DGIYFAATE  | 85    | 93   | 9              | HLA-A*02:01 | 85            | 59             | 0.00298676    | 5.90E+01      | 2.99E-03    | 59          | TRUE         | TRUE              |
| 1     | CASYHTVSL  | 657   | 665  | 9              | HLA-A*02:01 | 657           | 59             | 0.00299364    | 5.90E+01      | 2.99E-03    | 59          | TRUE         | TRUE              |
| 1     | KHLREFVFK  | 180   | 188  | 9              | HLA-A*02:01 | 180           | 59             | 0.00299709    | 5.90E+01      | 3.00E-03    | 59          | TRUE         | TRUE              |
| 1     | IGIINNTVY  | 1112  | 1120 | 9              | HLA-A*02:01 | 1112          | 59             | 0.00301301    | 5.90E+01      | 3.01E-03    | 59          | TRUE         | TRUE              |
| 1     | NPLAELKCS  | 281   | 289  | 9              | HLA-A*02:01 | 281           | 59             | 0.00302413    | 5.90E+01      | 3.02E-03    | 59          | TRUE         | TRUE              |
| 1     | AEKCSYKS   | 284   | 292  | 9              | HLA-A*02:01 | 284           | 59             | 0.00303389    | 5.90E+01      | 3.03E-03    | 59          | TRUE         | TRUE              |
| 1     | QNPLAELKC  | 280   | 288  | 9              | HLA-A*02:01 | 280           | 60             | 0.0030486     | 6.00E+01      | 3.05E-03    | 60          | TRUE         | TRUE              |
| 1     | AFNCTFEYI  | 156   | 164  | 9              | HLA-A*02:01 | 156           | 60             | 0.00306126    | 6.00E+01      | 3.06E-03    | 60          | TRUE         | TRUE              |
| 1     | TTEVMPVSM  | 705   | 713  | 9              | HLA-A*02:01 | 705           | 60             | 0.00306196    | 6.00E+01      | 3.06E-03    | 60          | TRUE         | TRUE              |
| 1     | VKGDVDRQI  | 389   | 397  | 9              | HLA-A*02:01 | 389           | 60             | 0.00306196    | 6.00E+01      | 3.06E-03    | 60          | TRUE         | TRUE              |
| 1     | PHGVVFLHV  | 1039  | 1047 | 9              | HLA-A*02:01 | 1039          | 60             | 0.00307044    | 6.00E+01      | 3.07E-03    | 60          | TRUE         | TRUE              |
| 1     | IDRLNEVAK  | 1165  | 1173 | 9              | HLA-A*02:01 | 1165          | 60             | 0.00307397    | 6.00E+01      | 3.07E-03    | 60          | TRUE         | TRUE              |
| 1     | TFFSTFKCY  | 359   | 367  | 9              | HLA-A*02:01 | 359           | 60             | 0.00308248    | 6.00E+01      | 3.08E-03    | 60          | TRUE         | TRUE              |
| 1     | NCDVIGII   | 1107  | 1115 | 9              | HLA-A*02:01 | 1107          | 60             | 0.00308603    | 6.00E+01      | 3.09E-03    | 60          | TRUE         | TRUE              |
| 1     | NFGAIVSVL  | 951   | 959  | 9              | HLA-A*02:01 | 951           | 60             | 0.00309671    | 6.00E+01      | 3.10E-03    | 60          | TRUE         | TRUE              |
| 1     | LDSFKEELD  | 1127  | 1135 | 9              | HLA-A*02:01 | 1127          | 60             | 0.00310099    | 6.00E+01      | 3.10E-03    | 60          | TRUE         | TRUE              |
| 1     | GQTGVADIY  | 400   | 408  | 9              | HLA-A*02:01 | 400           | 60             | 0.003155      | 6.00E+01      | 3.16E-03    | 60          | TRUE         | TRUE              |
| 1     | SLTTSTAL   | 919   | 927  | 9              | HLA-A*02:01 | 919           | 60             | 0.00316228    | 6.00E+01      | 3.16E-03    | 60          | TRUE         | TRUE              |
| 1     | MKQYGECLG  | 816   | 824  | 9              | HLA-A*02:01 | 816           | 60             | 0.00316228    | 6.00E+01      | 3.16E-03    | 60          | TRUE         | TRUE              |
| 1     | NFNGLTGTG  | 528   | 536  | 9              | HLA-A*02:01 | 528           | 60             | 0.00316884    | 6.00E+01      | 3.17E-03    | 60          | TRUE         | TRUE              |
| 1     | SSEAVLYQ   | 591   | 599  | 9              | HLA-A*02:01 | 591           | 60             | 0.00317322    | 6.00E+01      | 3.17E-03    | 60          | TRUE         | TRUE              |
| 1     | ECVLGQSKR  | 1013  | 1021 | 9              | HLA-A*02:01 | 1013          | 60             | 0.00317541    | 6.00E+01      | 3.18E-03    | 60          | TRUE         | TRUE              |
| 1     | FQOFGRDVS  | 548   | 556  | 9              | HLA-A*02:01 | 548           | 60             | 0.00317687    | 6.00E+01      | 3.18E-03    | 60          | TRUE         | TRUE              |
| 1     | TGFHTINH   | 67    | 75   | 9              | HLA-A*02:01 | 67            | 60             | 0.00317687    | 6.00E+01      | 3.18E-03    | 60          | TRUE         | TRUE              |
| 1     | AQVQKMYKT  | 765   | 773  | 9              | HLA-A*02:01 | 765           | 61             | 0.0031989     | 6.10E+01      | 3.20E-03    | 61          | TRUE         | TRUE              |
| 1     | VCGPKLST   | 510   | 518  | 9              | HLA-A*02:01 | 510           | 61             | 0.00320258    | 6.10E+01      | 3.20E-03    | 61          | TRUE         | TRUE              |
| 1     | ISIQIESTL  | 913   | 921  | 9              | HLA-A*02:01 | 913           | 61             | 0.00320479    | 6.10E+01      | 3.20E-03    | 61          | TRUE         | TRUE              |
| 1     | DATSTGNYN  | 429   | 437  | 9              | HLA-A*02:01 | 429           | 61             | 0.0032181     | 6.10E+01      | 3.22E-03    | 61          | TRUE         | TRUE              |
| 1     | ICASYHTVS  | 656   | 664  | 9              | HLA-A*02:01 | 656           | 61             | 0.00323892    | 6.10E+01      | 3.24E-03    | 61          | TRUE         | TRUE              |
| 1     | PFQOFGRDV  | 547   | 555  | 9              | HLA-A*02:01 | 547           | 61             | 0.00324116    | 6.10E+01      | 3.24E-03    | 61          | TRUE         | TRUE              |
| 1     | KSNVVRGVV  | 94    | 102  | 9              | HLA-A*02:01 | 94            | 61             | 0.0032419     | 6.10E+01      | 3.24E-03    | 61          | TRUE         | TRUE              |
| 1     | STFKYGVGS  | 362   | 370  | 9              | HLA-A*02:01 | 362           | 61             | 0.00326588    | 6.10E+01      | 3.27E-03    | 61          | TRUE         | TRUE              |
| 1     | QYGSFCTQL  | 737   | 745  | 9              | HLA-A*02:01 | 737           | 61             | 0.00327491    | 6.10E+01      | 3.27E-03    | 61          | TRUE         | TRUE              |
| 1     | NDYGFYTTT  | 479   | 487  | 9              | HLA-A*02:01 | 479           | 61             | 0.00328398    | 6.10E+01      | 3.28E-03    | 61          | TRUE         | TRUE              |
| 1     | ARDLICAQK  | 828   | 836  | 9              | HLA-A*02:01 | 828           | 61             | 0.00328625    | 6.10E+01      | 3.29E-03    | 61          | TRUE         | TRUE              |
| 1     | GNFKHLREF  | 177   | 185  | 9              | HLA-A*02:01 | 177           | 61             | 0.00330217    | 6.10E+01      | 3.30E-03    | 61          | TRUE         | TRUE              |
| 1     | VYKGYPID   | 196   | 204  | 9              | HLA-A*02:01 | 196           | 61             | 0.00330598    | 6.10E+01      | 3.31E-03    | 61          | TRUE         | TRUE              |
| 1     | KTPTLKYFG  | 772   | 780  | 9              | HLA-A*02:01 | 772           | 61             | 0.00331131    | 6.10E+01      | 3.31E-03    | 61          | TRUE         | TRUE              |
| 1     | CCMTSCCSC  | 1217  | 1225 | 9              | HLA-A*02:01 | 1217          | 62             | 0.0033243     | 6.20E+01      | 3.32E-03    | 62          | TRUE         | TRUE              |
| 1     | VLKGVKLHY  | 1246  | 1254 | 9              | HLA-A*02:01 | 1246          | 62             | 0.0033266     | 6.20E+01      | 3.33E-03    | 62          | TRUE         | TRUE              |
| 1     | NIDATSTGN  | 427   | 435  | 9              | HLA-A*02:01 | 427           | 62             | 0.0033358     | 6.20E+01      | 3.34E-03    | 62          | TRUE         | TRUE              |
| 1     | LDVSEKSGN  | 170   | 178  | 9              | HLA-A*02:01 | 170           | 62             | 0.00333887    | 6.20E+01      | 3.34E-03    | 62          | TRUE         | TRUE              |
| 1     | QIANQFNKA  | 904   | 912  | 9              | HLA-A*02:01 | 904           | 62             | 0.00334195    | 6.20E+01      | 3.34E-03    | 62          | TRUE         | TRUE              |
| 1     | ISPCSFGGV  | 573   | 581  | 9              | HLA-A*02:01 | 573           | 62             | 0.00334811    | 6.20E+01      | 3.35E-03    | 62          | TRUE         | TRUE              |
| 1     | VSKPMGTQT  | 140   | 148  | 9              | HLA-A*02:01 | 140           | 62             | 0.00337132    | 6.20E+01      | 3.37E-03    | 62          | TRUE         | TRUE              |
| 1     | VKQLSSNFG  | 945   | 953  | 9              | HLA-A*02:01 | 945           | 62             | 0.00337287    | 6.20E+01      | 3.37E-03    | 62          | TRUE         | TRUE              |
| 1     | KRSFIEDLL  | 796   | 804  | 9              | HLA-A*02:01 | 796           | 62             | 0.00337598    | 6.20E+01      | 3.38E-03    | 62          | TRUE         | TRUE              |
| 1     | VYADSFVVK  | 382   | 390  | 9              | HLA-A*02:01 | 382           | 62             | 0.00337676    | 6.20E+01      | 3.38E-03    | 62          | TRUE         | TRUE              |
| 1     | FNGTSWFIT  | 1079  | 1087 | 9              | HLA-A*02:01 | 1079          | 62             | 0.00337909    | 6.20E+01      | 3.38E-03    | 62          | TRUE         | TRUE              |
| 1     | TAIHADQLT  | 608   | 616  | 9              | HLA-A*02:01 | 608           | 62             | 0.00338221    | 6.20E+01      | 3.38E-03    | 62          | TRUE         | TRUE              |
| 1     | TPSSKRFQP  | 539   | 547  | 9              | HLA-A*02:01 | 539           | 62             | 0.0033861     | 6.20E+01      | 3.39E-03    | 62          | TRUE         | TRUE              |
| 1     | QIDRLITGR  | 974   | 982  | 9              | HLA-A*02:01 | 974           | 62             | 0.00340722    | 6.20E+01      | 3.41E-03    | 62          | TRUE         | TRUE              |
| 1     | NQKQIANQF  | 901   | 909  | 9              | HLA-A*02:01 | 901           | 62             | 0.00341193    | 6.20E+01      | 3.41E-03    | 62          | TRUE         | TRUE              |
| 1     | LGDISGINA  | 1148  | 1156 | 9              | HLA-A*02:01 | 1148          | 62             | 0.0034435     | 6.20E+01      | 3.44E-03    | 62          | TRUE         | TRUE              |
| 1     | LFNKVTLAD  | 804   | 812  | 9              | HLA-A*02:01 | 804           | 62             | 0.00345939    | 6.20E+01      | 3.46E-03    | 62          | TRUE         | TRUE              |
| 1     | KNQCVNFNF  | 521   | 529  | 9              | HLA-A*02:01 | 521           | 63             | 0.00346577    | 6.30E+01      | 3.47E-03    | 63          | TRUE         | TRUE              |
| 1     | VRDLPSGFN  | 206   | 214  | 9              | HLA-A*02:01 | 206           | 63             | 0.00349623    | 6.30E+01      | 3.50E-03    | 63          | TRUE         | TRUE              |
| 1     | TGVLTPSSK  | 535   | 543  | 9              | HLA-A*02:01 | 535           | 63             | 0.00350994    | 6.30E+01      | 3.51E-03    | 63          | TRUE         | TRUE              |
| 1     | ERKKISNCV  | 341   | 349  | 9              | HLA-A*02:01 | 341           | 63             | 0.00352696    | 6.30E+01      | 3.53E-03    | 63          | TRUE         | TRUE              |
| 1     | KCSVKSFEI  | 287   | 295  | 9              | HLA-A*02:01 | 287           | 63             | 0.00353509    | 6.30E+01      | 3.54E-03    | 63          | TRUE         | TRUE              |
| 1     | WRIYSTGNN  | 619   | 627  | 9              | HLA-A*02:01 | 619           | 63             | 0.00353671    | 6.30E+01      | 3.54E-03    | 63          | TRUE         | TRUE              |
| 1     | GTNASSEVA  | 587   | 595  | 9              | HLA-A*02:01 | 587           | 63             | 0.00357273    | 6.30E+01      | 3.57E-03    | 63          | TRUE         | TRUE              |
| 1</   |            |       |      |                |             |               |                |               |               |             |             |              |                   |

| seq # | peptide    | start | end  | peptide length | allele      | peptide index | median binding | comblib_sidne | comblib_sidne | legacy IC50 | legacy rank | scores equal | percentiles equal |
|-------|------------|-------|------|----------------|-------------|---------------|----------------|---------------|---------------|-------------|-------------|--------------|-------------------|
| 1     | NFRALTFAT  | 230   | 238  | 9              | HLA-A*02:01 | 230           | 64             | 0.00368044    | 6.40E+01      | 3.68E-03    | 64          | TRUE         | TRUE              |
| 1     | HGKLRPFER  | 445   | 453  | 9              | HLA-A*02:01 | 445           | 64             | 0.00370339    | 6.40E+01      | 3.70E-03    | 64          | TRUE         | TRUE              |
| 1     | REGVVFVNG  | 1073  | 1081 | 9              | HLA-A*02:01 | 1073          | 64             | 0.00371535    | 6.40E+01      | 3.72E-03    | 64          | TRUE         | TRUE              |
| 1     | QILPDLPKP  | 786   | 794  | 9              | HLA-A*02:01 | 786           | 64             | 0.00372477    | 6.40E+01      | 3.72E-03    | 64          | TRUE         | TRUE              |
| 1     | PKLSTDLIK  | 513   | 521  | 9              | HLA-A*02:01 | 513           | 64             | 0.00372477    | 6.40E+01      | 3.72E-03    | 64          | TRUE         | TRUE              |
| 1     | NCVADYSVL  | 347   | 355  | 9              | HLA-A*02:01 | 347           | 64             | 0.00372735    | 6.40E+01      | 3.73E-03    | 64          | TRUE         | TRUE              |
| 1     | CNMYICGDS  | 720   | 728  | 9              | HLA-A*02:01 | 720           | 64             | 0.003748      | 6.40E+01      | 3.75E-03    | 64          | TRUE         | TRUE              |
| 1     | ICHEGKAYF  | 1063  | 1071 | 9              | HLA-A*02:01 | 1063          | 64             | 0.00377051    | 6.40E+01      | 3.77E-03    | 64          | TRUE         | TRUE              |
| 1     | VTQQLIRAA  | 990   | 998  | 9              | HLA-A*02:01 | 990           | 64             | 0.00378443    | 6.40E+01      | 3.78E-03    | 64          | TRUE         | TRUE              |
| 1     | QQQGRDVS   | 549   | 557  | 9              | HLA-A*02:01 | 549           | 64             | 0.0037853     | 6.40E+01      | 3.79E-03    | 64          | TRUE         | TRUE              |
| 1     | DPLKPTKRS  | 790   | 798  | 9              | HLA-A*02:01 | 790           | 64             | 0.00380014    | 6.40E+01      | 3.80E-03    | 64          | TRUE         | TRUE              |
| 1     | KRVDFCGKG  | 1020  | 1028 | 9              | HLA-A*02:01 | 1020          | 64             | 0.0038054     | 6.40E+01      | 3.81E-03    | 64          | TRUE         | TRUE              |
| 1     | LPPLITDDM  | 843   | 851  | 9              | HLA-A*02:01 | 843           | 65             | 0.00381593    | 6.50E+01      | 3.82E-03    | 65          | TRUE         | TRUE              |
| 1     | CTPPALNCY  | 467   | 475  | 9              | HLA-A*02:01 | 467           | 65             | 0.00381944    | 6.50E+01      | 3.82E-03    | 65          | TRUE         | TRUE              |
| 1     | RAAEIRASA  | 996   | 1004 | 9              | HLA-A*02:01 | 996           | 65             | 0.00383884    | 6.50E+01      | 3.84E-03    | 65          | TRUE         | TRUE              |
| 1     | IDLQELGKY  | 1180  | 1188 | 9              | HLA-A*02:01 | 1180          | 65             | 0.00385834    | 6.50E+01      | 3.86E-03    | 65          | TRUE         | TRUE              |
| 1     | LPSGFNTLK  | 209   | 217  | 9              | HLA-A*02:01 | 209           | 65             | 0.00389852    | 6.50E+01      | 3.90E-03    | 65          | TRUE         | TRUE              |
| 1     | VPFSPDGKP  | 458   | 466  | 9              | HLA-A*02:01 | 458           | 65             | 0.00390571    | 6.50E+01      | 3.91E-03    | 65          | TRUE         | TRUE              |
| 1     | IVAYTMSLG  | 674   | 682  | 9              | HLA-A*02:01 | 674           | 65             | 0.00392645    | 6.50E+01      | 3.93E-03    | 65          | TRUE         | TRUE              |
| 1     | TTTGIGYQP  | 485   | 493  | 9              | HLA-A*02:01 | 485           | 65             | 0.00393641    | 6.50E+01      | 3.94E-03    | 65          | TRUE         | TRUE              |
| 1     | TEVMPVMSMA | 706   | 714  | 9              | HLA-A*02:01 | 706           | 65             | 0.00394457    | 6.50E+01      | 3.94E-03    | 65          | TRUE         | TRUE              |
| 1     | CTDVSIAIH  | 603   | 611  | 9              | HLA-A*02:01 | 603           | 65             | 0.00394639    | 6.50E+01      | 3.95E-03    | 65          | TRUE         | TRUE              |
| 1     | NCTDSTAI   | 602   | 610  | 9              | HLA-A*02:01 | 602           | 66             | 0.00399393    | 6.60E+01      | 3.99E-03    | 66          | TRUE         | TRUE              |
| 1     | GFMKQYGE   | 814   | 822  | 9              | HLA-A*02:01 | 814           | 66             | 0.00400129    | 6.60E+01      | 4.00E-03    | 66          | TRUE         | TRUE              |
| 1     | TGVIADYNY  | 402   | 410  | 9              | HLA-A*02:01 | 402           | 66             | 0.00402717    | 6.60E+01      | 4.03E-03    | 66          | TRUE         | TRUE              |
| 1     | GYYVDEIF   | 39    | 47   | 9              | HLA-A*02:01 | 39            | 66             | 0.00404576    | 6.60E+01      | 4.05E-03    | 66          | TRUE         | TRUE              |
| 1     | ITPGTNASS  | 584   | 592  | 9              | HLA-A*02:01 | 584           | 66             | 0.00405509    | 6.60E+01      | 4.06E-03    | 66          | TRUE         | TRUE              |
| 1     | DFCGKGHYL  | 1023  | 1031 | 9              | HLA-A*02:01 | 1023          | 66             | 0.00405602    | 6.60E+01      | 4.06E-03    | 66          | TRUE         | TRUE              |
| 1     | YTTTGIGYQ  | 484   | 492  | 9              | HLA-A*02:01 | 484           | 66             | 0.00407099    | 6.60E+01      | 4.07E-03    | 66          | TRUE         | TRUE              |
| 1     | TONTFVSGN  | 1099  | 1107 | 9              | HLA-A*02:01 | 1099          | 66             | 0.00408884    | 6.60E+01      | 4.09E-03    | 66          | TRUE         | TRUE              |
| 1     | PPLITDDMI  | 844   | 852  | 9              | HLA-A*02:01 | 844           | 66             | 0.00410582    | 6.60E+01      | 4.11E-03    | 66          | TRUE         | TRUE              |
| 1     | VFAQVKQMY  | 763   | 771  | 9              | HLA-A*02:01 | 763           | 66             | 0.00411055    | 6.60E+01      | 4.11E-03    | 66          | TRUE         | TRUE              |
| 1     | TREVFQVQK  | 760   | 768  | 9              | HLA-A*02:01 | 760           | 66             | 0.00412762    | 6.60E+01      | 4.13E-03    | 66          | TRUE         | TRUE              |
| 1     | LKPIFLPL   | 216   | 224  | 9              | HLA-A*02:01 | 216           | 67             | 0.00416869    | 6.70E+01      | 4.17E-03    | 67          | TRUE         | TRUE              |
| 1     | DDFMGCVLA  | 414   | 422  | 9              | HLA-A*02:01 | 414           | 67             | 0.00417446    | 6.70E+01      | 4.17E-03    | 67          | TRUE         | TRUE              |
| 1     | SQIESLTT   | 914   | 922  | 9              | HLA-A*02:01 | 914           | 67             | 0.00421697    | 6.70E+01      | 4.22E-03    | 67          | TRUE         | TRUE              |
| 1     | TPGTINASSE | 585   | 593  | 9              | HLA-A*02:01 | 585           | 67             | 0.00423253    | 6.70E+01      | 4.23E-03    | 67          | TRUE         | TRUE              |
| 1     | KVTLADAGF  | 807   | 815  | 9              | HLA-A*02:01 | 807           | 67             | 0.0042462     | 6.70E+01      | 4.25E-03    | 67          | TRUE         | TRUE              |
| 1     | STECANLL   | 728   | 736  | 9              | HLA-A*02:01 | 728           | 67             | 0.00431519    | 6.70E+01      | 4.32E-03    | 67          | TRUE         | TRUE              |
| 1     | NIQKIDRL   | 1160  | 1168 | 9              | HLA-A*02:01 | 1160          | 67             | 0.00432514    | 6.70E+01      | 4.33E-03    | 67          | TRUE         | TRUE              |
| 1     | LIAIVMVTI  | 1206  | 1214 | 9              | HLA-A*02:01 | 1206          | 68             | 0.00435512    | 6.80E+01      | 4.36E-03    | 68          | TRUE         | TRUE              |
| 1     | ITQRNFVSP  | 1086  | 1094 | 9              | HLA-A*02:01 | 1086          | 68             | 0.00435612    | 6.80E+01      | 4.36E-03    | 68          | TRUE         | TRUE              |
| 1     | HTSPVDVLG  | 1141  | 1149 | 9              | HLA-A*02:01 | 1141          | 68             | 0.00435712    | 6.80E+01      | 4.36E-03    | 68          | TRUE         | TRUE              |
| 1     | PSGFNTLKP  | 210   | 218  | 9              | HLA-A*02:01 | 210           | 68             | 0.00443302    | 6.80E+01      | 4.43E-03    | 68          | TRUE         | TRUE              |
| 1     | YNYKLPDF   | 408   | 416  | 9              | HLA-A*02:01 | 408           | 68             | 0.00446478    | 6.80E+01      | 4.46E-03    | 68          | TRUE         | TRUE              |
| 1     | IRACNFELC  | 125   | 133  | 9              | HLA-A*02:01 | 125           | 68             | 0.00450505    | 6.80E+01      | 4.51E-03    | 68          | TRUE         | TRUE              |
| 1     | SYECDIPIG  | 645   | 653  | 9              | HLA-A*02:01 | 645           | 68             | 0.00452064    | 6.80E+01      | 4.52E-03    | 68          | TRUE         | TRUE              |
| 1     | RNTRVFAQ   | 758   | 766  | 9              | HLA-A*02:01 | 758           | 69             | 0.00454465    | 6.90E+01      | 4.54E-03    | 69          | TRUE         | TRUE              |
| 1     | CNFELCDNP  | 128   | 136  | 9              | HLA-A*02:01 | 128           | 69             | 0.00455932    | 6.90E+01      | 4.56E-03    | 69          | TRUE         | TRUE              |
| 1     | DYNYKLPPD  | 407   | 415  | 9              | HLA-A*02:01 | 407           | 69             | 0.0045867     | 6.90E+01      | 4.59E-03    | 69          | TRUE         | TRUE              |
| 1     | YPDEIFRSD  | 42    | 50   | 9              | HLA-A*02:01 | 42            | 69             | 0.00458881    | 6.90E+01      | 4.59E-03    | 69          | TRUE         | TRUE              |
| 1     | LDRCITFDD  | 16    | 24   | 9              | HLA-A*02:01 | 16            | 69             | 0.00459727    | 6.90E+01      | 4.60E-03    | 69          | TRUE         | TRUE              |
| 1     | TSGSOLDRC  | 11    | 19   | 9              | HLA-A*02:01 | 11            | 69             | 0.00461424    | 6.90E+01      | 4.61E-03    | 69          | TRUE         | TRUE              |
| 1     | VQAPNYTOH  | 25    | 33   | 9              | HLA-A*02:01 | 25            | 69             | 0.0046366     | 6.90E+01      | 4.64E-03    | 69          | TRUE         | TRUE              |
| 1     | VSLIRSTSQ  | 663   | 671  | 9              | HLA-A*02:01 | 663           | 69             | 0.00463981    | 6.90E+01      | 4.64E-03    | 69          | TRUE         | TRUE              |
| 1     | YIKWPYYVW  | 1191  | 1199 | 9              | HLA-A*02:01 | 1191          | 69             | 0.0046957     | 6.90E+01      | 4.70E-03    | 69          | TRUE         | TRUE              |
| 1     | SPQIITTON  | 1093  | 1101 | 9              | HLA-A*02:01 | 1093          | 69             | 0.00471846    | 6.90E+01      | 4.72E-03    | 69          | TRUE         | TRUE              |
| 1     | VLGQSKRVD  | 1015  | 1023 | 9              | HLA-A*02:01 | 1015          | 70             | 0.00475445    | 7.00E+01      | 4.75E-03    | 70          | TRUE         | TRUE              |
| 1     | KNLNLSDI   | 1173  | 1181 | 9              | HLA-A*02:01 | 1173          | 70             | 0.00477419    | 7.00E+01      | 4.77E-03    | 70          | TRUE         | TRUE              |
| 1     | PTKRSFIED  | 794   | 802  | 9              | HLA-A*02:01 | 794           | 70             | 0.0047852     | 7.00E+01      | 4.79E-03    | 70          | TRUE         | TRUE              |
| 1     | YLRHGKLRP  | 442   | 450  | 9              | HLA-A*02:01 | 442           | 70             | 0.0047874     | 7.00E+01      | 4.79E-03    | 70          | TRUE         | TRUE              |
| 1     | MYICGDSTE  | 722   | 730  | 9              | HLA-A*02:01 | 722           | 70             | 0.00483281    | 7.00E+01      | 4.83E-03    | 70          | TRUE         | TRUE              |
| 1     | RVDFCGKGY  | 1021  | 1029 | 9              | HLA-A*02:01 | 1021          | 70             | 0.00484172    | 7.00E+01      | 4.84E-03    | 70          | TRUE         | TRUE              |
| 1     | TSEILDISP  | 567   | 575  | 9              | HLA-A*02:01 | 567           | 70             | 0.00486295    | 7.00E+01      | 4.86E-03    | 70          | TRUE         | TRUE              |
| 1     | VPSQERNFT  | 1050  | 1058 | 9              | HLA-A*02:01 | 1050          | 70             | 0.00489328    | 7.00E+01      | 4.89E-03    | 70          | TRUE         | TRUE              |
| 1     | ILSLRDKVE  | 962   | 970  | 9              | HLA-A*02:01 | 962           | 70             | 0.00490908    | 7.00E+01      | 4.91E-03    | 70          | TRUE         | TRUE              |
| 1     | LICAQGFNG  | 831   | 839  | 9              | HLA-A*02:01 | 831           | 70             | 0.00493174    | 7.00E+01      | 4.93E-03    | 70          | TRUE         | TRUE              |
| 1     | QSVIINNNS  | 112   | 120  | 9              | HLA-A*02:01 | 112           | 70             | 0.00494083    | 7.00E+01      | 4.94E-03    | 70          | TRUE         | TRUE              |
| 1     | LSGIAEAQD  | 749   | 757  | 9              | HLA-A*02:01 | 749           | 71             | 0.00496478    | 7.10E+01      | 4.96E-03    | 71          | TRUE         | TRUE              |
| 1     | QIPFAMQMA  | 877   | 885  | 9              | HLA-A*02:01 | 877           | 71             | 0.00498884    | 7.10E+01      | 4.99E-03    | 71          | TRUE         | TRUE              |
| 1     | LTITSTALG  | 920   | 928  | 9              | HLA-A*02:01 | 920           | 71             | 0.00501187    | 7.10E+01      | 5.01E-03    | 71          | TRUE         | TRUE              |
| 1     | KFPSPVYAE  | 333   | 341  | 9              | HLA-A*02:01 | 333           | 71             | 0.00503385    | 7.10E+01      | 5.03E-03    | 71          | TRUE         | TRUE              |
| 1     | RGWVFWGSTM | 99    | 107  | 9              | HLA-A*02:01 | 99            | 71             | 0.00503501    | 7.10E+01      | 5.04E-03    | 71          | TRUE         | TRUE              |
| 1     | STAIHADQL  | 607   | 615  | 9              | HLA-A*02:01 | 607           | 71             | 0.00503501    | 7.10E+01      | 5.04E-03    | 71          | TRUE         | TRUE              |
| 1     | QTQAGCLIG  | 630   | 638  | 9              | HLA-A*02:01 | 630           | 71             | 0.00504661    | 7.10E+01      | 5.05E-03    | 71          | TRUE         | TRUE              |
| 1     | TPTLKYFGG  | 773   | 781  | 9              | HLA-A*02:01 | 773           | 71             | 0.00506524    | 7.10E+01      | 5.07E-03    | 71          | TRUE         | TRUE              |
| 1     | LGIDNARDL  | 823   | 831  | 9              | HLA-A*02:01 | 823           | 71             | 0.00506991    | 7.10E+01      | 5.07E-03    | 71          | TRUE         | TRUE              |
| 1     | IDATSTGNY  | 428   | 436  | 9              | HLA-A*02:01 | 428           | 71             | 0.00508628    | 7.10E+01      | 5.09E-03    | 71          | TRUE         | TRUE              |
| 1     | GEVFNATKF  | 326   | 334  | 9              | HLA-A*02:01 | 326           | 71             | 0.00509331    | 7.10E+01      | 5.09E-03    | 71          | TRUE         | TRUE              |
| 1     | NCTFEYISD  | 158   | 166  | 9              | HLA-A*02:01 | 158           | 71             | 0.00511093    | 7.10E+01      | 5.11E-03    | 71          | TRUE         | TRUE              |
| 1     | PCTPPALNC  | 466   | 474  | 9              | HLA-A*02:01 | 466           | 71             | 0.00513452    | 7.10E+01      | 5.13E-03    | 71          | TRUE         | TRUE              |
| 1     | VPSGDVVR   | 308   | 316  | 9              | HLA-A*02:01 | 308           | 71             | 0.0051357     | 7.10E+01      | 5.14E-03    | 71          | TRUE         | TRUE              |
| 1     | DRCTTFDDV  | 17    | 25   | 9              | HLA-A*02:01 | 17            | 71             | 0.0051357     | 7.10E+01      | 5.14E-03    | 71          | TRUE         | TRUE              |
| 1     | DVSTAIHAD  | 605   | 613  | 9              | HLA-A*02:01 | 605           | 71             | 0.00514399    | 7.10E+01      | 5.14E-03    | 71          | TRUE         | TRUE              |
| 1     | DENGTTTDA  | 267   | 275  | 9              | HLA-A*02:01 | 267           | 71             | 0.00515466    | 7.10E+01      | 5.15E-03    | 71          | TRUE         | TRUE              |
| 1     | GKPCPTPAL  | 464   | 472  | 9              | HLA-A*02:01 | 464           | 72             | 0.00516416    | 7.20E+01      | 5.16E-03    | 72          | TRUE         | TRUE              |
| 1     | VFGSTMNNK  | 102   | 110  | 9              | HLA-A*02:01 | 102           | 72             | 0.00517845    | 7.20E+01      | 5.18E-03    | 72          | TRUE         | TRUE              |
| 1     | KYKFNHTSP  | 1136  | 1144 | 9              | HLA-A*02:01 | 1136          | 72             | 0.00523962    | 7.20E+01      | 5.24E-03    | 72          | TRUE         | TRUE              |
| 1     | LVSGTATAG  | 859   | 867  | 9              | HLA-A*02:01 | 859           | 72             | 0.00524807    | 7.20E+01      | 5.25E-03    | 72          | TRUE         | TRUE              |
| 1     | LNTLVKQLS  | 941   | 949  | 9              | HLA-A*02:01 | 941           | 72             | 0.0052942     | 7.20E+01      | 5.29E-03    | 72          | TRUE         | TRUE              |
| 1     | DIWGTSAAA  | 243   | 251  | 9              | HLA-A*02:01 | 243           | 72             | 0.00531129    | 7.20E+01      | 5.31E-03    | 72          | TRUE         | TRUE              |
| 1     | SFVVKGGDDV | 386   | 394  | 9              | HLA-A*02:01 | 386           | 72             | 0.00531986    | 7.20E+01      | 5.32E-03    | 72          | TRUE         | TRUE              |
| 1     | PFSPPDG    |       |      |                |             |               |                |               |               |             |             |              |                   |

| seq # | peptide    | start | end  | peptide length | allele      | peptide index | median binding | comblib_sidney | comblib_sidney | legacy IC50 | legacy rank | scores equal | percentiles equal |
|-------|------------|-------|------|----------------|-------------|---------------|----------------|----------------|----------------|-------------|-------------|--------------|-------------------|
| 1     | LKPTKRSFI  | 792   | 800  | 9              | HLA-A*02:01 | 792           | 73             | 0.00547016     | 7.30E+01       | 5.47E-03    | 73          | TRUE         | TRUE              |
| 1     | AFSPAQDIW  | 237   | 245  | 9              | HLA-A*02:01 | 237           | 73             | 0.00547772     | 7.30E+01       | 5.48E-03    | 73          | TRUE         | TRUE              |
| 1     | GTATAGWTF  | 862   | 870  | 9              | HLA-A*02:01 | 862           | 73             | 0.00548277     | 7.30E+01       | 5.48E-03    | 73          | TRUE         | TRUE              |
| 1     | CVNFNENGL  | 524   | 532  | 9              | HLA-A*02:01 | 524           | 73             | 0.00549541     | 7.30E+01       | 5.50E-03    | 73          | TRUE         | TRUE              |
| 1     | WVYVWLGFA  | 1196  | 1204 | 9              | HLA-A*02:01 | 1196          | 73             | 0.00553605     | 7.30E+01       | 5.54E-03    | 73          | TRUE         | TRUE              |
| 1     | YQPYRVVVL  | 491   | 499  | 9              | HLA-A*02:01 | 491           | 73             | 0.00554626     | 7.30E+01       | 5.55E-03    | 73          | TRUE         | TRUE              |
| 1     | PDGPKCTPP  | 462   | 470  | 9              | HLA-A*02:01 | 462           | 73             | 0.00555009     | 7.30E+01       | 5.55E-03    | 73          | TRUE         | TRUE              |
| 1     | TSTGNVNYK  | 431   | 439  | 9              | HLA-A*02:01 | 431           | 73             | 0.00556032     | 7.30E+01       | 5.56E-03    | 73          | TRUE         | TRUE              |
| 1     | TSPDVLGLD  | 1142  | 1150 | 9              | HLA-A*02:01 | 1142          | 73             | 0.00559629     | 7.30E+01       | 5.60E-03    | 73          | TRUE         | TRUE              |
| 1     | LAWNTRNRD  | 421   | 429  | 9              | HLA-A*02:01 | 421           | 73             | 0.00561436     | 7.30E+01       | 5.61E-03    | 73          | TRUE         | TRUE              |
| 1     | AKTSVDCNM  | 714   | 722  | 9              | HLA-A*02:01 | 714           | 74             | 0.00566239     | 7.40E+01       | 5.66E-03    | 74          | TRUE         | TRUE              |
| 1     | AEVQIDRLU  | 971   | 979  | 9              | HLA-A*02:01 | 971           | 74             | 0.00572796     | 7.40E+01       | 5.73E-03    | 74          | TRUE         | TRUE              |
| 1     | CDNPFPAVS  | 133   | 141  | 9              | HLA-A*02:01 | 133           | 74             | 0.00573324     | 7.40E+01       | 5.73E-03    | 74          | TRUE         | TRUE              |
| 1     | LAATKMSEC  | 1006  | 1014 | 9              | HLA-A*02:01 | 1006          | 74             | 0.00574778     | 7.40E+01       | 5.75E-03    | 74          | TRUE         | TRUE              |
| 1     | AQDIWGTSA  | 241   | 249  | 9              | HLA-A*02:01 | 241           | 74             | 0.0057544      | 7.40E+01       | 5.75E-03    | 74          | TRUE         | TRUE              |
| 1     | HTFGNPVPI  | 74    | 82   | 9              | HLA-A*02:01 | 74            | 74             | 0.00578496     | 7.40E+01       | 5.78E-03    | 74          | TRUE         | TRUE              |
| 1     | RSFIEDLLF  | 797   | 805  | 9              | HLA-A*02:01 | 797           | 74             | 0.00579162     | 7.40E+01       | 5.79E-03    | 74          | TRUE         | TRUE              |
| 1     | TSQKSIVAY  | 669   | 677  | 9              | HLA-A*02:01 | 669           | 74             | 0.00581835     | 7.40E+01       | 5.82E-03    | 74          | TRUE         | TRUE              |
| 1     | GCVLAWNTR  | 418   | 426  | 9              | HLA-A*02:01 | 418           | 74             | 0.00585868     | 7.40E+01       | 5.86E-03    | 74          | TRUE         | TRUE              |
| 1     | DYGFYTTTG  | 480   | 488  | 9              | HLA-A*02:01 | 480           | 75             | 0.00586678     | 7.50E+01       | 5.87E-03    | 75          | TRUE         | TRUE              |
| 1     | SPCSFGGVS  | 574   | 582  | 9              | HLA-A*02:01 | 574           | 75             | 0.00586949     | 7.50E+01       | 5.87E-03    | 75          | TRUE         | TRUE              |
| 1     | GSFCTQLNR  | 739   | 747  | 9              | HLA-A*02:01 | 739           | 75             | 0.00589115     | 7.50E+01       | 5.89E-03    | 75          | TRUE         | TRUE              |
| 1     | MTSCCCLK   | 1219  | 1227 | 9              | HLA-A*02:01 | 1219          | 75             | 0.00589251     | 7.50E+01       | 5.89E-03    | 75          | TRUE         | TRUE              |
| 1     | VNCTDVSTA  | 601   | 609  | 9              | HLA-A*02:01 | 601           | 75             | 0.00591289     | 7.50E+01       | 5.91E-03    | 75          | TRUE         | TRUE              |
| 1     | DDSEPVKLG  | 1241  | 1249 | 9              | HLA-A*02:01 | 1241          | 75             | 0.00592379     | 7.50E+01       | 5.92E-03    | 75          | TRUE         | TRUE              |
| 1     | ISNCVADYS  | 345   | 353  | 9              | HLA-A*02:01 | 345           | 75             | 0.00592652     | 7.50E+01       | 5.93E-03    | 75          | TRUE         | TRUE              |
| 1     | GKLRPFERD  | 446   | 454  | 9              | HLA-A*02:01 | 446           | 75             | 0.00597173     | 7.50E+01       | 5.97E-03    | 75          | TRUE         | TRUE              |
| 1     | QELGKYEYQ  | 1183  | 1191 | 9              | HLA-A*02:01 | 1183          | 75             | 0.00601174     | 7.50E+01       | 6.01E-03    | 75          | TRUE         | TRUE              |
| 1     | STDLINKQC  | 516   | 524  | 9              | HLA-A*02:01 | 516           | 75             | 0.00601589     | 7.50E+01       | 6.02E-03    | 75          | TRUE         | TRUE              |
| 1     | TVSLSRSTS  | 662   | 670  | 9              | HLA-A*02:01 | 662           | 75             | 0.0060256      | 7.50E+01       | 6.03E-03    | 75          | TRUE         | TRUE              |
| 1     | MGTOHTMI   | 144   | 152  | 9              | HLA-A*02:01 | 144           | 75             | 0.00603949     | 7.50E+01       | 6.04E-03    | 75          | TRUE         | TRUE              |
| 1     | VVPSGDVVR  | 307   | 315  | 9              | HLA-A*02:01 | 307           | 75             | 0.00605899     | 7.50E+01       | 6.06E-03    | 75          | TRUE         | TRUE              |
| 1     | INNTVYDPL  | 1115  | 1123 | 9              | HLA-A*02:01 | 1115          | 75             | 0.00607855     | 7.50E+01       | 6.08E-03    | 75          | TRUE         | TRUE              |
| 1     | PTLKYVGGF  | 774   | 782  | 9              | HLA-A*02:01 | 774           | 75             | 0.00609256     | 7.50E+01       | 6.09E-03    | 75          | TRUE         | TRUE              |
| 1     | RDVSDFDTS  | 553   | 561  | 9              | HLA-A*02:01 | 553           | 75             | 0.00611505     | 7.50E+01       | 6.12E-03    | 75          | TRUE         | TRUE              |
| 1     | GTQHTMIF   | 145   | 153  | 9              | HLA-A*02:01 | 145           | 75             | 0.0061235      | 7.50E+01       | 6.12E-03    | 75          | TRUE         | TRUE              |
| 1     | WERKISNCS  | 340   | 348  | 9              | HLA-A*02:01 | 340           | 76             | 0.00615602     | 7.60E+01       | 6.16E-03    | 76          | TRUE         | TRUE              |
| 1     | CAQKFNGLT  | 833   | 841  | 9              | HLA-A*02:01 | 833           | 76             | 0.00618301     | 7.60E+01       | 6.18E-03    | 76          | TRUE         | TRUE              |
| 1     | KYEQYIKWP  | 1187  | 1195 | 9              | HLA-A*02:01 | 1187          | 76             | 0.00618443     | 7.60E+01       | 6.18E-03    | 76          | TRUE         | TRUE              |
| 1     | ITGRQLSLQ  | 979   | 987  | 9              | HLA-A*02:01 | 979           | 76             | 0.00619013     | 7.60E+01       | 6.19E-03    | 76          | TRUE         | TRUE              |
| 1     | INITNFRAI  | 226   | 234  | 9              | HLA-A*02:01 | 226           | 76             | 0.00619156     | 7.60E+01       | 6.19E-03    | 76          | TRUE         | TRUE              |
| 1     | PTNFSISIT  | 697   | 705  | 9              | HLA-A*02:01 | 697           | 76             | 0.00619156     | 7.60E+01       | 6.19E-03    | 76          | TRUE         | TRUE              |
| 1     | QTGVADIYN  | 401   | 409  | 9              | HLA-A*02:01 | 401           | 76             | 0.00619726     | 7.60E+01       | 6.20E-03    | 76          | TRUE         | TRUE              |
| 1     | DFTDSVRDP  | 557   | 565  | 9              | HLA-A*02:01 | 557           | 76             | 0.00621155     | 7.60E+01       | 6.21E-03    | 76          | TRUE         | TRUE              |
| 1     | TAALVSGTA  | 856   | 864  | 9              | HLA-A*02:01 | 856           | 76             | 0.00622587     | 7.60E+01       | 6.23E-03    | 76          | TRUE         | TRUE              |
| 1     | ECDIPGAG   | 647   | 655  | 9              | HLA-A*02:01 | 647           | 76             | 0.0062431      | 7.60E+01       | 6.24E-03    | 76          | TRUE         | TRUE              |
| 1     | QPFQFGGRD  | 546   | 554  | 9              | HLA-A*02:01 | 546           | 76             | 0.00637823     | 7.60E+01       | 6.38E-03    | 76          | TRUE         | TRUE              |
| 1     | WPWVYVWLG  | 1194  | 1202 | 9              | HLA-A*02:01 | 1194          | 76             | 0.00639146     | 7.60E+01       | 6.39E-03    | 76          | TRUE         | TRUE              |
| 1     | GRDVSDFDT  | 552   | 560  | 9              | HLA-A*02:01 | 552           | 76             | 0.00640472     | 7.60E+01       | 6.40E-03    | 76          | TRUE         | TRUE              |
| 1     | SPDVLGLDI  | 1143  | 1151 | 9              | HLA-A*02:01 | 1143          | 76             | 0.00640619     | 7.60E+01       | 6.41E-03    | 76          | TRUE         | TRUE              |
| 1     | AAEIRASAN  | 997   | 1005 | 9              | HLA-A*02:01 | 997           | 76             | 0.0064328      | 7.60E+01       | 6.43E-03    | 76          | TRUE         | TRUE              |
| 1     | QIQESLTTT  | 915   | 923  | 9              | HLA-A*02:01 | 915           | 76             | 0.00644169     | 7.60E+01       | 6.44E-03    | 76          | TRUE         | TRUE              |
| 1     | NVVIACNFI  | 122   | 130  | 9              | HLA-A*02:01 | 122           | 77             | 0.00647143     | 7.70E+01       | 6.47E-03    | 77          | TRUE         | TRUE              |
| 1     | ADQLTPAWR  | 612   | 620  | 9              | HLA-A*02:01 | 612           | 77             | 0.00655843     | 7.70E+01       | 6.56E-03    | 77          | TRUE         | TRUE              |
| 1     | NVVRGWVFG  | 96    | 104  | 9              | HLA-A*02:01 | 96            | 77             | 0.00656145     | 7.70E+01       | 6.56E-03    | 77          | TRUE         | TRUE              |
| 1     | RGVYYPDEI  | 38    | 46   | 9              | HLA-A*02:01 | 38            | 77             | 0.00656145     | 7.70E+01       | 6.56E-03    | 77          | TRUE         | TRUE              |
| 1     | IYSTGNVVF  | 621   | 629  | 9              | HLA-A*02:01 | 621           | 77             | 0.00657961     | 7.70E+01       | 6.58E-03    | 77          | TRUE         | TRUE              |
| 1     | MRGVYYPDE  | 37    | 45   | 9              | HLA-A*02:01 | 37            | 77             | 0.00664355     | 7.70E+01       | 6.64E-03    | 77          | TRUE         | TRUE              |
| 1     | QVQGMKYTP  | 766   | 774  | 9              | HLA-A*02:01 | 766           | 77             | 0.00665426     | 7.70E+01       | 6.65E-03    | 77          | TRUE         | TRUE              |
| 1     | VAVLYQVDN  | 594   | 602  | 9              | HLA-A*02:01 | 594           | 77             | 0.00665886     | 7.70E+01       | 6.66E-03    | 77          | TRUE         | TRUE              |
| 1     | AMQMAYRFN  | 881   | 889  | 9              | HLA-A*02:01 | 881           | 77             | 0.00668652     | 7.70E+01       | 6.69E-03    | 77          | TRUE         | TRUE              |
| 1     | QAAPHGVVF  | 1036  | 1044 | 9              | HLA-A*02:01 | 1036          | 77             | 0.00668652     | 7.70E+01       | 6.69E-03    | 77          | TRUE         | TRUE              |
| 1     | LGKYEYQIK  | 1185  | 1193 | 9              | HLA-A*02:01 | 1185          | 78             | 0.00671893     | 7.80E+01       | 6.72E-03    | 78          | TRUE         | TRUE              |
| 1     | AEIRASANL  | 998   | 1006 | 9              | HLA-A*02:01 | 998           | 78             | 0.00676083     | 7.80E+01       | 6.76E-03    | 78          | TRUE         | TRUE              |
| 1     | LTVLPPILT  | 840   | 848  | 9              | HLA-A*02:01 | 840           | 78             | 0.00680769     | 7.80E+01       | 6.81E-03    | 78          | TRUE         | TRUE              |
| 1     | DCNMICYGD  | 719   | 727  | 9              | HLA-A*02:01 | 719           | 78             | 0.00688177     | 7.80E+01       | 6.88E-03    | 78          | TRUE         | TRUE              |
| 1     | YDPLQELPD  | 1120  | 1128 | 9              | HLA-A*02:01 | 1120          | 78             | 0.00691035     | 7.80E+01       | 6.91E-03    | 78          | TRUE         | TRUE              |
| 1     | AGWTFGAGA  | 866   | 874  | 9              | HLA-A*02:01 | 866           | 78             | 0.00693426     | 7.80E+01       | 6.93E-03    | 78          | TRUE         | TRUE              |
| 1     | SWFITQRNF  | 1083  | 1091 | 9              | HLA-A*02:01 | 1083          | 78             | 0.00694384     | 7.80E+01       | 6.94E-03    | 78          | TRUE         | TRUE              |
| 1     | CGSCCKDFE  | 1232  | 1240 | 9              | HLA-A*02:01 | 1232          | 78             | 0.00696627     | 7.80E+01       | 6.97E-03    | 78          | TRUE         | TRUE              |
| 1     | REVFAQVKQ  | 761   | 769  | 9              | HLA-A*02:01 | 761           | 78             | 0.0069775      | 7.80E+01       | 6.98E-03    | 78          | TRUE         | TRUE              |
| 1     | ATKMSECVL  | 1008  | 1016 | 9              | HLA-A*02:01 | 1008          | 78             | 0.00701455     | 7.80E+01       | 7.01E-03    | 78          | TRUE         | TRUE              |
| 1     | TOQLIRAAE  | 991   | 999  | 9              | HLA-A*02:01 | 991           | 78             | 0.00704693     | 7.80E+01       | 7.05E-03    | 78          | TRUE         | TRUE              |
| 1     | VSATKLNDL  | 369   | 377  | 9              | HLA-A*02:01 | 369           | 78             | 0.00705992     | 7.80E+01       | 7.06E-03    | 78          | TRUE         | TRUE              |
| 1     | TDSVRDPKT  | 559   | 567  | 9              | HLA-A*02:01 | 559           | 78             | 0.00706968     | 7.80E+01       | 7.07E-03    | 78          | TRUE         | TRUE              |
| 1     | LKGVKLHYT  | 1247  | 1255 | 9              | HLA-A*02:01 | 1247          | 78             | 0.00709578     | 7.80E+01       | 7.10E-03    | 78          | TRUE         | TRUE              |
| 1     | NHSTSPDVL  | 1140  | 1148 | 9              | HLA-A*02:01 | 1140          | 78             | 0.00710232     | 7.80E+01       | 7.10E-03    | 78          | TRUE         | TRUE              |
| 1     | VKQMYKTPT  | 767   | 775  | 9              | HLA-A*02:01 | 767           | 79             | 0.00712853     | 7.90E+01       | 7.13E-03    | 79          | TRUE         | TRUE              |
| 1     | KSGNFKHLR  | 175   | 183  | 9              | HLA-A*02:01 | 175           | 79             | 0.00713181     | 7.90E+01       | 7.13E-03    | 79          | TRUE         | TRUE              |
| 1     | SPDGKPTCP  | 461   | 469  | 9              | HLA-A*02:01 | 461           | 79             | 0.00714003     | 7.90E+01       | 7.14E-03    | 79          | TRUE         | TRUE              |
| 1     | IMVITLLCOM | 1211  | 1219 | 9              | HLA-A*02:01 | 1211          | 79             | 0.00719449     | 7.90E+01       | 7.19E-03    | 79          | TRUE         | TRUE              |
| 1     | LAELKCSVK  | 283   | 291  | 9              | HLA-A*02:01 | 283           | 79             | 0.00733669     | 7.90E+01       | 7.34E-03    | 79          | TRUE         | TRUE              |
| 1     | SDTLTYLTD  | 49    | 57   | 9              | HLA-A*02:01 | 49            | 79             | 0.00733669     | 7.90E+01       | 7.34E-03    | 79          | TRUE         | TRUE              |
| 1     | GWTFGAGAA  | 867   | 875  | 9              | HLA-A*02:01 | 867           | 79             | 0.00738924     | 7.90E+01       | 7.39E-03    | 79          | TRUE         | TRUE              |
| 1     | NFSISITTE  | 699   | 707  | 9              | HLA-A*02:01 | 699           | 79             | 0.00742848     | 7.90E+01       | 7.43E-03    | 79          | TRUE         | TRUE              |
| 1     | STALGLQD   | 924   | 932  | 9              | HLA-A*02:01 | 924           | 79             | 0.0074319      | 7.90E+01       | 7.43E-03    | 79          | TRUE         | TRUE              |
| 1     | PFAMQMAYR  | 879   | 887  | 9              | HLA-A*02:01 | 879           | 79             | 0.0074319      | 7.90E+01       | 7.43E-03    | 79          | TRUE         | TRUE              |
| 1     | NITNFRAL   | 227   | 235  | 9              | HLA-A*02:01 | 227           | 79             | 0.0074817      | 7.90E+01       | 7.48E-03    | 79          | TRUE         | TRUE              |
| 1     | MYKTPTLKY  | 770   | 778  | 9              | HLA-A*02:01 | 770           | 80             | 0.00748514     | 8.00E+01       | 7.49E-03    | 80          | TRUE         | TRUE              |
| 1     | DNPPFAVSK  | 134   | 142  | 9              | HLA-A*02:01 | 134           | 80             | 0.00755614     | 8.00E+01       | 7.56E-03    | 80          | TRUE         | TRUE              |
| 1     | GTITDAVDC  | 270   | 278  | 9              | HLA-A*02:01 | 270           | 80             | 0.00755614     | 8.00E+01       | 7.56E-03    | 80          | TRUE         | TRUE              |
| 1     | SECVLGQSK  | 1012  | 1020 | 9              | HLA-A*02:01 | 1012          | 80             | 0.00755614     | 8.00E+01       | 7.56E-03    | 80          | TRUE</       |                   |

| seq # | peptide    | start | end  | peptide length | allele      | peptide index | median binding | comblib_sidne | comblib_sidne | legacy IC50 | legacy rank | scores equal | percentiles equal |
|-------|------------|-------|------|----------------|-------------|---------------|----------------|---------------|---------------|-------------|-------------|--------------|-------------------|
| 1     | QDVVNQNAQ  | 931   | 939  | 9              | HLA-A*02:01 | 931           | 81             | 0.00807421    | 8.10E+01      | 8.07E-03    | 81          | TRUE         | TRUE              |
| 1     | NDILSRIDK  | 960   | 968  | 9              | HLA-A*02:01 | 960           | 81             | 0.00812269    | 8.10E+01      | 8.12E-03    | 81          | TRUE         | TRUE              |
| 1     | CTQLNRALS  | 742   | 750  | 9              | HLA-A*02:01 | 742           | 81             | 0.00816582    | 8.10E+01      | 8.17E-03    | 81          | TRUE         | TRUE              |
| 1     | VMMVTILCC  | 1210  | 1218 | 9              | HLA-A*02:01 | 1210          | 81             | 0.0081903     | 8.10E+01      | 8.19E-03    | 81          | TRUE         | TRUE              |
| 1     | LGFIAGLIA  | 1200  | 1208 | 9              | HLA-A*02:01 | 1200          | 81             | 0.00822243    | 8.10E+01      | 8.22E-03    | 81          | TRUE         | TRUE              |
| 1     | LYYKGYQP   | 194   | 202  | 9              | HLA-A*02:01 | 194           | 81             | 0.00822811    | 8.10E+01      | 8.23E-03    | 81          | TRUE         | TRUE              |
| 1     | PAQDIWGT   | 240   | 248  | 9              | HLA-A*02:01 | 240           | 81             | 0.00826038    | 8.10E+01      | 8.26E-03    | 81          | TRUE         | TRUE              |
| 1     | QSLQTYVTQ  | 984   | 992  | 9              | HLA-A*02:01 | 984           | 81             | 0.00830807    | 8.10E+01      | 8.31E-03    | 81          | TRUE         | TRUE              |
| 1     | GVSAATKLD  | 368   | 376  | 9              | HLA-A*02:01 | 368           | 82             | 0.00835795    | 8.20E+01      | 8.36E-03    | 82          | TRUE         | TRUE              |
| 1     | NYKLDDFM   | 409   | 417  | 9              | HLA-A*02:01 | 409           | 82             | 0.00839847    | 8.20E+01      | 8.40E-03    | 82          | TRUE         | TRUE              |
| 1     | PAWRIYSTG  | 617   | 625  | 9              | HLA-A*02:01 | 617           | 82             | 0.00845279    | 8.20E+01      | 8.45E-03    | 82          | TRUE         | TRUE              |
| 1     | VSDFTDSVR  | 555   | 563  | 9              | HLA-A*02:01 | 555           | 82             | 0.00845668    | 8.20E+01      | 8.46E-03    | 82          | TRUE         | TRUE              |
| 1     | NNKSQSVII  | 108   | 116  | 9              | HLA-A*02:01 | 108           | 82             | 0.0084879     | 8.20E+01      | 8.49E-03    | 82          | TRUE         | TRUE              |
| 1     | TDADVCSQN  | 273   | 281  | 9              | HLA-A*02:01 | 273           | 82             | 0.0085428     | 8.20E+01      | 8.54E-03    | 82          | TRUE         | TRUE              |
| 1     | KTSEILDIS  | 566   | 574  | 9              | HLA-A*02:01 | 566           | 82             | 0.00855067    | 8.20E+01      | 8.55E-03    | 82          | TRUE         | TRUE              |
| 1     | DCSQNPALAE | 277   | 285  | 9              | HLA-A*02:01 | 277           | 82             | 0.00856249    | 8.20E+01      | 8.56E-03    | 82          | TRUE         | TRUE              |
| 1     | NTRNDATS   | 424   | 432  | 9              | HLA-A*02:01 | 424           | 82             | 0.00866962    | 8.20E+01      | 8.67E-03    | 82          | TRUE         | TRUE              |
| 1     | YQPIDVVRD  | 200   | 208  | 9              | HLA-A*02:01 | 200           | 82             | 0.00873172    | 8.20E+01      | 8.73E-03    | 82          | TRUE         | TRUE              |
| 1     | QDRNTRFV   | 756   | 764  | 9              | HLA-A*02:01 | 756           | 83             | 0.00883894    | 8.30E+01      | 8.84E-03    | 83          | TRUE         | TRUE              |
| 1     | VDFCGKGYH  | 1022  | 1030 | 9              | HLA-A*02:01 | 1022          | 83             | 0.00884301    | 8.30E+01      | 8.84E-03    | 83          | TRUE         | TRUE              |
| 1     | KGKGYHMSF  | 1026  | 1034 | 9              | HLA-A*02:01 | 1026          | 83             | 0.00885116    | 8.30E+01      | 8.85E-03    | 83          | TRUE         | TRUE              |
| 1     | LTLTSGSDL  | 8     | 16   | 9              | HLA-A*02:01 | 8             | 83             | 0.00887156    | 8.30E+01      | 8.87E-03    | 83          | TRUE         | TRUE              |
| 1     | KGAYFPREG  | 1067  | 1075 | 9              | HLA-A*02:01 | 1067          | 83             | 0.00889201    | 8.30E+01      | 8.89E-03    | 83          | TRUE         | TRUE              |
| 1     | LMSFPQAAAP | 1031  | 1039 | 9              | HLA-A*02:01 | 1031          | 83             | 0.00897635    | 8.30E+01      | 8.98E-03    | 83          | TRUE         | TRUE              |
| 1     | KYDENGIT   | 265   | 273  | 9              | HLA-A*02:01 | 265           | 83             | 0.00901986    | 8.30E+01      | 9.02E-03    | 83          | TRUE         | TRUE              |
| 1     | ENQKQIANQ  | 900   | 908  | 9              | HLA-A*02:01 | 900           | 83             | 0.0090469     | 8.30E+01      | 9.05E-03    | 83          | TRUE         | TRUE              |
| 1     | YNSTFFSTF  | 356   | 364  | 9              | HLA-A*02:01 | 356           | 83             | 0.00911591    | 8.30E+01      | 9.12E-03    | 83          | TRUE         | TRUE              |
| 1     | ADSFVVKGD  | 384   | 392  | 9              | HLA-A*02:01 | 384           | 83             | 0.0092151     | 8.30E+01      | 9.22E-03    | 83          | TRUE         | TRUE              |
| 1     | LDKVEAEVQ  | 966   | 974  | 9              | HLA-A*02:01 | 966           | 83             | 0.00924911    | 8.30E+01      | 9.25E-03    | 83          | TRUE         | TRUE              |
| 1     | IGVTQNVLY  | 891   | 899  | 9              | HLA-A*02:01 | 891           | 84             | 0.00931108    | 8.40E+01      | 9.31E-03    | 84          | TRUE         | TRUE              |
| 1     | VYAWVERKKI | 337   | 345  | 9              | HLA-A*02:01 | 337           | 84             | 0.00931537    | 8.40E+01      | 9.32E-03    | 84          | TRUE         | TRUE              |
| 1     | TRNIDATST  | 425   | 433  | 9              | HLA-A*02:01 | 425           | 84             | 0.00931966    | 8.40E+01      | 9.32E-03    | 84          | TRUE         | TRUE              |
| 1     | PFGEVFNAT  | 324   | 332  | 9              | HLA-A*02:01 | 324           | 84             | 0.0093261     | 8.40E+01      | 9.33E-03    | 84          | TRUE         | TRUE              |
| 1     | AWERKKISN  | 339   | 347  | 9              | HLA-A*02:01 | 339           | 84             | 0.00932825    | 8.40E+01      | 9.33E-03    | 84          | TRUE         | TRUE              |
| 1     | SDAFSLDVS  | 165   | 173  | 9              | HLA-A*02:01 | 165           | 84             | 0.00934114    | 8.40E+01      | 9.34E-03    | 84          | TRUE         | TRUE              |
| 1     | WNTRNIDAT  | 423   | 431  | 9              | HLA-A*02:01 | 423           | 84             | 0.0093713     | 8.40E+01      | 9.37E-03    | 84          | TRUE         | TRUE              |
| 1     | LKIKQCNVF  | 519   | 527  | 9              | HLA-A*02:01 | 519           | 84             | 0.00952796    | 8.40E+01      | 9.53E-03    | 84          | TRUE         | TRUE              |
| 1     | QTSNFRVVP  | 301   | 309  | 9              | HLA-A*02:01 | 301           | 84             | 0.00955213    | 8.40E+01      | 9.55E-03    | 84          | TRUE         | TRUE              |
| 1     | HGVVTLHVT  | 1040  | 1048 | 9              | HLA-A*02:01 | 1040          | 84             | 0.00957635    | 8.40E+01      | 9.58E-03    | 84          | TRUE         | TRUE              |
| 1     | PNYQTHTSS  | 28    | 36   | 9              | HLA-A*02:01 | 28            | 84             | 0.00960727    | 8.40E+01      | 9.61E-03    | 84          | TRUE         | TRUE              |
| 1     | NESULDIQE  | 1176  | 1184 | 9              | HLA-A*02:01 | 1176          | 84             | 0.00966051    | 8.40E+01      | 9.66E-03    | 84          | TRUE         | TRUE              |
| 1     | REFVFKNKD  | 183   | 191  | 9              | HLA-A*02:01 | 183           | 84             | 0.00966273    | 8.40E+01      | 9.66E-03    | 84          | TRUE         | TRUE              |
| 1     | STNVIRAC   | 120   | 128  | 9              | HLA-A*02:01 | 120           | 84             | 0.00966718    | 8.40E+01      | 9.67E-03    | 84          | TRUE         | TRUE              |
| 1     | EGVVFVNGT  | 1074  | 1082 | 9              | HLA-A*02:01 | 1074          | 85             | 0.0097949     | 8.50E+01      | 9.79E-03    | 85          | TRUE         | TRUE              |
| 1     | VRGVVFGST  | 98    | 106  | 9              | HLA-A*02:01 | 98            | 85             | 0.00984918    | 8.50E+01      | 9.85E-03    | 85          | TRUE         | TRUE              |
| 1     | GSGLDRCTT  | 13    | 21   | 9              | HLA-A*02:01 | 13            | 85             | 0.00992659    | 8.50E+01      | 9.93E-03    | 85          | TRUE         | TRUE              |
| 1     | LTGTGVLTP  | 532   | 540  | 9              | HLA-A*02:01 | 532           | 85             | 0.00993345    | 8.50E+01      | 9.93E-03    | 85          | TRUE         | TRUE              |
| 1     | TTSTALGKL  | 922   | 930  | 9              | HLA-A*02:01 | 922           | 85             | 0.00995405    | 8.50E+01      | 9.95E-03    | 85          | TRUE         | TRUE              |
| 1     | GSTMNNKSI  | 104   | 112  | 9              | HLA-A*02:01 | 104           | 85             | 0.00996552    | 8.50E+01      | 9.97E-03    | 85          | TRUE         | TRUE              |
| 1     | NATKFPSPV  | 330   | 338  | 9              | HLA-A*02:01 | 330           | 85             | 0.0099816     | 8.50E+01      | 9.98E-03    | 85          | TRUE         | TRUE              |
| 1     | AYFVGYLKP  | 251   | 259  | 9              | HLA-A*02:01 | 251           | 85             | 0.00998389    | 8.50E+01      | 9.98E-03    | 85          | TRUE         | TRUE              |
| 1     | LYENQKQIA  | 898   | 906  | 9              | HLA-A*02:01 | 898           | 85             | 0.010027669   | 8.50E+01      | 1.00E-02    | 85          | TRUE         | TRUE              |
| 1     | ADAGFMKQY  | 811   | 819  | 9              | HLA-A*02:01 | 811           | 85             | 0.010125116   | 8.50E+01      | 1.01E-02    | 85          | TRUE         | TRUE              |
| 1     | PSVYAWERK  | 335   | 343  | 9              | HLA-A*02:01 | 335           | 85             | 0.01013678    | 8.50E+01      | 1.01E-02    | 85          | TRUE         | TRUE              |
| 1     | LVKQLSSNF  | 944   | 952  | 9              | HLA-A*02:01 | 944           | 85             | 0.010185914   | 8.50E+01      | 1.02E-02    | 85          | TRUE         | TRUE              |
| 1     | VKSFEIDKG  | 290   | 298  | 9              | HLA-A*02:01 | 290           | 85             | 0.010185914   | 8.50E+01      | 1.02E-02    | 85          | TRUE         | TRUE              |
| 1     | DINARDLIC  | 825   | 833  | 9              | HLA-A*02:01 | 825           | 85             | 0.010197648   | 8.50E+01      | 1.02E-02    | 85          | TRUE         | TRUE              |
| 1     | SVRDPKTSE  | 561   | 569  | 9              | HLA-A*02:01 | 561           | 86             | 0.010399202   | 8.60E+01      | 1.04E-02    | 86          | TRUE         | TRUE              |
| 1     | GVLTSPSKR  | 536   | 544  | 9              | HLA-A*02:01 | 536           | 86             | 0.010505095   | 8.60E+01      | 1.05E-02    | 86          | TRUE         | TRUE              |
| 1     | ATKLNLDLCF | 371   | 379  | 9              | HLA-A*02:01 | 371           | 86             | 0.01051962    | 8.60E+01      | 1.05E-02    | 86          | TRUE         | TRUE              |
| 1     | KSIVAYTMS  | 672   | 680  | 9              | HLA-A*02:01 | 672           | 86             | 0.010539014   | 8.60E+01      | 1.05E-02    | 86          | TRUE         | TRUE              |
| 1     | ATEKSNVVR  | 91    | 99   | 9              | HLA-A*02:01 | 91            | 86             | 0.010553585   | 8.60E+01      | 1.06E-02    | 86          | TRUE         | TRUE              |
| 1     | SFCTQLNRRA | 740   | 748  | 9              | HLA-A*02:01 | 740           | 86             | 0.010614511   | 8.60E+01      | 1.06E-02    | 86          | TRUE         | TRUE              |
| 1     | ISSVLNDIL  | 955   | 963  | 9              | HLA-A*02:01 | 955           | 86             | 0.010685627   | 8.60E+01      | 1.07E-02    | 86          | TRUE         | TRUE              |
| 1     | NDLCFSNVY  | 375   | 383  | 9              | HLA-A*02:01 | 375           | 86             | 0.0107004     | 8.60E+01      | 1.07E-02    | 86          | TRUE         | TRUE              |
| 1     | VSEKSGNFK  | 172   | 180  | 9              | HLA-A*02:01 | 172           | 86             | 0.010717661   | 8.60E+01      | 1.07E-02    | 86          | TRUE         | TRUE              |
| 1     | GNNVFQTQA  | 625   | 633  | 9              | HLA-A*02:01 | 625           | 86             | 0.010834279   | 8.60E+01      | 1.08E-02    | 86          | TRUE         | TRUE              |
| 1     | QFGRDVSDF  | 550   | 558  | 9              | HLA-A*02:01 | 550           | 86             | 0.010836774   | 8.60E+01      | 1.08E-02    | 86          | TRUE         | TRUE              |
| 1     | GNPVIPFKD  | 77    | 85   | 9              | HLA-A*02:01 | 77            | 87             | 0.010861755   | 8.70E+01      | 1.09E-02    | 87          | TRUE         | TRUE              |
| 1     | LIGAHEVDT  | 636   | 644  | 9              | HLA-A*02:01 | 636           | 87             | 0.010864256   | 8.70E+01      | 1.09E-02    | 87          | TRUE         | TRUE              |
| 1     | YICGDSTEC  | 723   | 731  | 9              | HLA-A*02:01 | 723           | 87             | 0.01092195    | 8.70E+01      | 1.09E-02    | 87          | TRUE         | TRUE              |
| 1     | APNYTQHTS  | 27    | 35   | 9              | HLA-A*02:01 | 27            | 87             | 0.010929493   | 8.70E+01      | 1.09E-02    | 87          | TRUE         | TRUE              |
| 1     | SNVVRGWVF  | 95    | 103  | 9              | HLA-A*02:01 | 95            | 87             | 0.01095973    | 8.70E+01      | 1.10E-02    | 87          | TRUE         | TRUE              |
| 1     | QPELDSFKE  | 1124  | 1132 | 9              | HLA-A*02:01 | 1124          | 87             | 0.011030622   | 8.70E+01      | 1.10E-02    | 87          | TRUE         | TRUE              |
| 1     | TSTALGLKQ  | 923   | 931  | 9              | HLA-A*02:01 | 923           | 87             | 0.0110535     | 8.70E+01      | 1.11E-02    | 87          | TRUE         | TRUE              |
| 1     | CSCGSCCKF  | 1230  | 1238 | 9              | HLA-A*02:01 | 1230          | 87             | 0.011086641   | 8.70E+01      | 1.11E-02    | 87          | TRUE         | TRUE              |
| 1     | QIITDNTFT  | 1095  | 1103 | 9              | HLA-A*02:01 | 1095          | 87             | 0.01122018    | 8.70E+01      | 1.12E-02    | 87          | TRUE         | TRUE              |
| 1     | DEIFRSOTL  | 44    | 52   | 9              | HLA-A*02:01 | 44            | 87             | 0.011277167   | 8.70E+01      | 1.13E-02    | 87          | TRUE         | TRUE              |
| 1     | LSSNFGAIS  | 948   | 956  | 9              | HLA-A*02:01 | 948           | 87             | 0.011397248   | 8.70E+01      | 1.14E-02    | 87          | TRUE         | TRUE              |
| 1     | RKKISNCVA  | 342   | 350  | 9              | HLA-A*02:01 | 342           | 87             | 0.011428783   | 8.70E+01      | 1.14E-02    | 87          | TRUE         | TRUE              |
| 1     | YHTVSLIRS  | 660   | 668  | 9              | HLA-A*02:01 | 660           | 87             | 0.011492116   | 8.70E+01      | 1.15E-02    | 87          | TRUE         | TRUE              |
| 1     | CFSNVYADS  | 378   | 386  | 9              | HLA-A*02:01 | 378           | 88             | 0.01163858    | 8.80E+01      | 1.16E-02    | 88          | TRUE         | TRUE              |
| 1     | KGACSCGSC  | 1227  | 1235 | 9              | HLA-A*02:01 | 1227          | 88             | 0.011649305   | 8.80E+01      | 1.16E-02    | 88          | TRUE         | TRUE              |
| 1     | CYGVSAATKL | 366   | 374  | 9              | HLA-A*02:01 | 366           | 88             | 0.011808643   | 8.80E+01      | 1.18E-02    | 88          | TRUE         | TRUE              |
| 1     | SGSGLDRCT  | 12    | 20   | 9              | HLA-A*02:01 | 12            | 88             | 0.011857687   | 8.80E+01      | 1.19E-02    | 88          | TRUE         | TRUE              |
| 1     | SMAKTSVDC  | 712   | 720  | 9              | HLA-A*02:01 | 712           | 88             | 0.011893235   | 8.80E+01      | 1.19E-02    | 88          | TRUE         | TRUE              |
| 1     | SCCKFDEDD  | 1234  | 1242 | 9              | HLA-A*02:01 | 1234          | 88             | 0.011898713   | 8.80E+01      | 1.19E-02    | 88          | TRUE         | TRUE              |
| 1     | EIFRSOTLY  | 45    | 53   | 9              | HLA-A*02:01 | 45            | 88             | 0.01191242    | 8.80E+01      | 1.19E-02    | 88          | TRUE         | TRUE              |
| 1     | EPVLKGVKL  | 1244  | 1252 | 9              | HLA-A*02:01 | 1244          | 88             | 0.012067019   | 8.80E+01      | 1.21E-02    | 88          | TRUE         | TRUE              |
| 1     | GFNTLKPFI  | 212   | 220  | 9              | HLA-A*02:01 | 212           | 88             | 0.012103194   | 8.80E+01      | 1.21E-02    | 88          | TRUE         | TRUE              |
| 1     | LRSTSQKSI  | 666   | 674  | 9              | HLA-A*02:01 | 666           | 88             | 0.01211714    | 8.80E+01      | 1.21E-02    | 88          | TRUE         | TRUE              |
| 1     | LTAFAIPAQD | 235   | 243  | 9              | HLA-A*02:01 | 235           | 88             | 0.012164661   | 8.80E+01      | 1.22E-02    | 88          | TRUE</       |                   |

| seq # | peptide    | start | end  | peptide length | allele      | peptide index | median binding | comblib_sidne | comblib_sidne | legacy IC50 | legacy rank | scores equal | percentiles equal |
|-------|------------|-------|------|----------------|-------------|---------------|----------------|---------------|---------------|-------------|-------------|--------------|-------------------|
| 1     | DKGIYQTSN  | 296   | 304  | 9              | HLA-A*02:01 | 296           | 90             | 0.013471005   | 9.00E+01      | 1.35E-02    | 90          | TRUE         | TRUE              |
| 1     | NNSTNVVIR  | 118   | 126  | 9              | HLA-A*02:01 | 118           | 90             | 0.013905929   | 9.00E+01      | 1.39E-02    | 90          | TRUE         | TRUE              |
| 1     | KPTKRSFIE  | 793   | 801  | 9              | HLA-A*02:01 | 793           | 90             | 0.014015223   | 9.00E+01      | 1.40E-02    | 90          | TRUE         | TRUE              |
| 1     | NFRVVPDGD  | 304   | 312  | 9              | HLA-A*02:01 | 304           | 90             | 0.014028137   | 9.00E+01      | 1.40E-02    | 90          | TRUE         | TRUE              |
| 1     | AVLYQDVNC  | 595   | 603  | 9              | HLA-A*02:01 | 595           | 90             | 0.014037831   | 9.00E+01      | 1.40E-02    | 90          | TRUE         | TRUE              |
| 1     | TAGWTFGAG  | 865   | 873  | 9              | HLA-A*02:01 | 865           | 90             | 0.014066952   | 9.00E+01      | 1.41E-02    | 90          | TRUE         | TRUE              |
| 1     | CSVKSFEID  | 288   | 296  | 9              | HLA-A*02:01 | 288           | 91             | 0.014924507   | 9.10E+01      | 1.49E-02    | 91          | TRUE         | TRUE              |
| 1     | TSSMRGVVY  | 34    | 42   | 9              | HLA-A*02:01 | 34            | 91             | 0.014955468   | 9.10E+01      | 1.50E-02    | 91          | TRUE         | TRUE              |
| 1     | ATKFPSPYA  | 331   | 339  | 9              | HLA-A*02:01 | 331           | 91             | 0.014996848   | 9.10E+01      | 1.50E-02    | 91          | TRUE         | TRUE              |
| 1     | LSRDLKVEA  | 963   | 971  | 9              | HLA-A*02:01 | 963           | 91             | 0.015128644   | 9.10E+01      | 1.51E-02    | 91          | TRUE         | TRUE              |
| 1     | GVVFLHVTY  | 1041  | 1049 | 9              | HLA-A*02:01 | 1041          | 91             | 0.015170504   | 9.10E+01      | 1.52E-02    | 91          | TRUE         | TRUE              |
| 1     | SOERNFTTA  | 1052  | 1060 | 9              | HLA-A*02:01 | 1052          | 91             | 0.015240528   | 9.10E+01      | 1.52E-02    | 91          | TRUE         | TRUE              |
| 1     | VFQTQAGCL  | 628   | 636  | 9              | HLA-A*02:01 | 628           | 91             | 0.01527214    | 9.10E+01      | 1.53E-02    | 91          | TRUE         | TRUE              |
| 1     | PDVDLGDIS  | 1144  | 1152 | 9              | HLA-A*02:01 | 1144          | 91             | 0.015317927   | 9.10E+01      | 1.53E-02    | 91          | TRUE         | TRUE              |
| 1     | SDFTSVRD   | 556   | 564  | 9              | HLA-A*02:01 | 556           | 91             | 0.015328512   | 9.10E+01      | 1.53E-02    | 91          | TRUE         | TRUE              |
| 1     | SKRFQPFQQ  | 542   | 550  | 9              | HLA-A*02:01 | 542           | 91             | 0.015370925   | 9.10E+01      | 1.54E-02    | 91          | TRUE         | TRUE              |
| 1     | LNRLASGIA  | 745   | 753  | 9              | HLA-A*02:01 | 745           | 92             | 0.01544543    | 9.20E+01      | 1.54E-02    | 92          | TRUE         | TRUE              |
| 1     | EKSGNFKHL  | 174   | 182  | 9              | HLA-A*02:01 | 174           | 92             | 0.01555966    | 9.20E+01      | 1.56E-02    | 92          | TRUE         | TRUE              |
| 1     | AALVSGTAT  | 857   | 865  | 9              | HLA-A*02:01 | 857           | 92             | 0.015602709   | 9.20E+01      | 1.56E-02    | 92          | TRUE         | TRUE              |
| 1     | TQNVLYENQ  | 894   | 902  | 9              | HLA-A*02:01 | 894           | 92             | 0.01562068    | 9.20E+01      | 1.56E-02    | 92          | TRUE         | TRUE              |
| 1     | HVDTSYECD  | 641   | 649  | 9              | HLA-A*02:01 | 641           | 92             | 0.01564228    | 9.20E+01      | 1.56E-02    | 92          | TRUE         | TRUE              |
| 1     | ACNFELCDN  | 127   | 135  | 9              | HLA-A*02:01 | 127           | 92             | 0.015689171   | 9.20E+01      | 1.57E-02    | 92          | TRUE         | TRUE              |
| 1     | RFNGIGVTQ  | 887   | 895  | 9              | HLA-A*02:01 | 887           | 92             | 0.01620317    | 9.20E+01      | 1.62E-02    | 92          | TRUE         | TRUE              |
| 1     | YSNVTFGHT  | 63    | 71   | 9              | HLA-A*02:01 | 63            | 92             | 0.01643615    | 9.20E+01      | 1.64E-02    | 92          | TRUE         | TRUE              |
| 1     | VVFVNGTSW  | 1076  | 1084 | 9              | HLA-A*02:01 | 1076          | 92             | 0.016542456   | 9.20E+01      | 1.65E-02    | 92          | TRUE         | TRUE              |
| 1     | YAWERKKIS  | 338   | 346  | 9              | HLA-A*02:01 | 338           | 92             | 0.016565326   | 9.20E+01      | 1.66E-02    | 92          | TRUE         | TRUE              |
| 1     | KTSVDCNMY  | 715   | 723  | 9              | HLA-A*02:01 | 715           | 92             | 0.016595869   | 9.20E+01      | 1.66E-02    | 92          | TRUE         | TRUE              |
| 1     | IAAEDQRNT  | 752   | 760  | 9              | HLA-A*02:01 | 752           | 92             | 0.016641789   | 9.20E+01      | 1.66E-02    | 92          | TRUE         | TRUE              |
| 1     | GFLVYVYGY  | 192   | 200  | 9              | HLA-A*02:01 | 192           | 92             | 0.016745573   | 9.20E+01      | 1.67E-02    | 92          | TRUE         | TRUE              |
| 1     | RSDTLYLTO  | 48    | 56   | 9              | HLA-A*02:01 | 48            | 92             | 0.016768723   | 9.20E+01      | 1.68E-02    | 92          | TRUE         | TRUE              |
| 1     | LNCYVPLND  | 472   | 480  | 9              | HLA-A*02:01 | 472           | 92             | 0.016861647   | 9.20E+01      | 1.69E-02    | 92          | TRUE         | TRUE              |
| 1     | CSCLKGACS  | 1223  | 1231 | 9              | HLA-A*02:01 | 1223          | 93             | 0.017013748   | 9.30E+01      | 1.70E-02    | 93          | TRUE         | TRUE              |
| 1     | IADYNYKLP  | 405   | 413  | 9              | HLA-A*02:01 | 405           | 93             | 0.017151417   | 9.30E+01      | 1.72E-02    | 93          | TRUE         | TRUE              |
| 1     | GDSTECANL  | 726   | 734  | 9              | HLA-A*02:01 | 726           | 93             | 0.017354016   | 9.30E+01      | 1.74E-02    | 93          | TRUE         | TRUE              |
| 1     | DVSEKSGNF  | 171   | 179  | 9              | HLA-A*02:01 | 171           | 93             | 0.017790985   | 9.30E+01      | 1.78E-02    | 93          | TRUE         | TRUE              |
| 1     | DSSIAYSNN  | 684   | 692  | 9              | HLA-A*02:01 | 684           | 93             | 0.017790985   | 9.30E+01      | 1.78E-02    | 93          | TRUE         | TRUE              |
| 1     | IFKLPLGIN  | 219   | 227  | 9              | HLA-A*02:01 | 219           | 93             | 0.01792852    | 9.30E+01      | 1.80E-02    | 93          | TRUE         | TRUE              |
| 1     | AYTMSLGAD  | 676   | 684  | 9              | HLA-A*02:01 | 676           | 93             | 0.018167702   | 9.30E+01      | 1.82E-02    | 93          | TRUE         | TRUE              |
| 1     | EFVFNKXDG  | 184   | 192  | 9              | HLA-A*02:01 | 184           | 93             | 0.018276793   | 9.30E+01      | 1.83E-02    | 93          | TRUE         | TRUE              |
| 1     | KDGIYFAAT  | 84    | 92   | 9              | HLA-A*02:01 | 84            | 94             | 0.018424682   | 9.40E+01      | 1.84E-02    | 94          | TRUE         | TRUE              |
| 1     | TQHTSSMRG  | 31    | 39   | 9              | HLA-A*02:01 | 31            | 94             | 0.018535316   | 9.40E+01      | 1.85E-02    | 94          | TRUE         | TRUE              |
| 1     | SYHTYSLLR  | 659   | 667  | 9              | HLA-A*02:01 | 659           | 94             | 0.01864661    | 9.40E+01      | 1.86E-02    | 94          | TRUE         | TRUE              |
| 1     | NYNYKYRYL  | 435   | 443  | 9              | HLA-A*02:01 | 435           | 94             | 0.018758582   | 9.40E+01      | 1.88E-02    | 94          | TRUE         | TRUE              |
| 1     | LNDLRLD    | 959   | 967  | 9              | HLA-A*02:01 | 959           | 94             | 0.018832154   | 9.40E+01      | 1.88E-02    | 94          | TRUE         | TRUE              |
| 1     | AIPTNFSIS  | 695   | 703  | 9              | HLA-A*02:01 | 695           | 94             | 0.01892344    | 9.40E+01      | 1.89E-02    | 94          | TRUE         | TRUE              |
| 1     | SVITPGTNA  | 582   | 590  | 9              | HLA-A*02:01 | 582           | 94             | 0.01914256    | 9.40E+01      | 1.91E-02    | 94          | TRUE         | TRUE              |
| 1     | SGNFKHLRE  | 176   | 184  | 9              | HLA-A*02:01 | 176           | 94             | 0.01918669    | 9.40E+01      | 1.92E-02    | 94          | TRUE         | TRUE              |
| 1     | DVVRFPNIT  | 312   | 320  | 9              | HLA-A*02:01 | 312           | 94             | 0.019373139   | 9.40E+01      | 1.94E-02    | 94          | TRUE         | TRUE              |
| 1     | MSECVLGQS  | 1011  | 1019 | 9              | HLA-A*02:01 | 1011          | 94             | 0.01976059    | 9.40E+01      | 1.98E-02    | 94          | TRUE         | TRUE              |
| 1     | RDPKTSLEI  | 563   | 571  | 9              | HLA-A*02:01 | 563           | 94             | 0.019787913   | 9.40E+01      | 1.98E-02    | 94          | TRUE         | TRUE              |
| 1     | LTSGLDLDR  | 10    | 18   | 9              | HLA-A*02:01 | 10            | 94             | 0.019787913   | 9.40E+01      | 1.98E-02    | 94          | TRUE         | TRUE              |
| 1     | PIDVVRDLP  | 202   | 210  | 9              | HLA-A*02:01 | 202           | 94             | 0.01981071    | 9.40E+01      | 1.98E-02    | 94          | TRUE         | TRUE              |
| 1     | GSCKCFDED  | 1233  | 1241 | 9              | HLA-A*02:01 | 1233          | 94             | 0.01990215    | 9.40E+01      | 1.99E-02    | 94          | TRUE         | TRUE              |
| 1     | MAKTSVDCN  | 713   | 721  | 9              | HLA-A*02:01 | 713           | 94             | 0.019925077   | 9.40E+01      | 1.99E-02    | 94          | TRUE         | TRUE              |
| 1     | NVTGTFHTN  | 65    | 73   | 9              | HLA-A*02:01 | 65            | 94             | 0.01996181    | 9.40E+01      | 2.00E-02    | 94          | TRUE         | TRUE              |
| 1     | YTQHTSSMR  | 30    | 38   | 9              | HLA-A*02:01 | 30            | 94             | 0.019971009   | 9.40E+01      | 2.00E-02    | 94          | TRUE         | TRUE              |
| 1     | NFNFNGLTG  | 526   | 534  | 9              | HLA-A*02:01 | 526           | 94             | 0.01999401    | 9.40E+01      | 2.00E-02    | 94          | TRUE         | TRUE              |
| 1     | DIPIGAGIC  | 649   | 657  | 9              | HLA-A*02:01 | 649           | 94             | 0.02006781    | 9.40E+01      | 2.01E-02    | 94          | TRUE         | TRUE              |
| 1     | TGNVYNYKYR | 433   | 441  | 9              | HLA-A*02:01 | 433           | 94             | 0.0201558     | 9.40E+01      | 2.02E-02    | 94          | TRUE         | TRUE              |
| 1     | TSCSCCLKG  | 1220  | 1228 | 9              | HLA-A*02:01 | 1220          | 95             | 0.020361042   | 9.50E+01      | 2.04E-02    | 95          | TRUE         | TRUE              |
| 1     | VRQIAPGQT  | 394   | 402  | 9              | HLA-A*02:01 | 394           | 95             | 0.0204833     | 9.50E+01      | 2.05E-02    | 95          | TRUE         | TRUE              |
| 1     | DRUITGRQL  | 976   | 984  | 9              | HLA-A*02:01 | 976           | 95             | 0.020715718   | 9.50E+01      | 2.07E-02    | 95          | TRUE         | TRUE              |
| 1     | AVSKPMGTQ  | 139   | 147  | 9              | HLA-A*02:01 | 139           | 95             | 0.020878534   | 9.50E+01      | 2.09E-02    | 95          | TRUE         | TRUE              |
| 1     | SGNCDVVG   | 1105  | 1113 | 9              | HLA-A*02:01 | 1105          | 95             | 0.020941125   | 9.50E+01      | 2.09E-02    | 95          | TRUE         | TRUE              |
| 1     | CKCFDEDD   | 1235  | 1243 | 9              | HLA-A*02:01 | 1235          | 95             | 0.02100874    | 9.50E+01      | 2.10E-02    | 95          | TRUE         | TRUE              |
| 1     | KPTTFMLKY  | 258   | 266  | 9              | HLA-A*02:01 | 258           | 95             | 0.02111543    | 9.50E+01      | 2.11E-02    | 95          | TRUE         | TRUE              |
| 1     | VMPVSMAKT  | 708   | 716  | 9              | HLA-A*02:01 | 708           | 95             | 0.02123244    | 9.50E+01      | 2.12E-02    | 95          | TRUE         | TRUE              |
| 1     | PDPLKPTKR  | 789   | 797  | 9              | HLA-A*02:01 | 789           | 95             | 0.021261799   | 9.50E+01      | 2.13E-02    | 95          | TRUE         | TRUE              |
| 1     | CGKYHLM    | 1025  | 1033 | 9              | HLA-A*02:01 | 1025          | 95             | 0.02162719    | 9.50E+01      | 2.16E-02    | 95          | TRUE         | TRUE              |
| 1     | GWVFGSTMN  | 100   | 108  | 9              | HLA-A*02:01 | 100           | 95             | 0.021667061   | 9.50E+01      | 2.17E-02    | 95          | TRUE         | TRUE              |
| 1     | KPCTPPALN  | 465   | 473  | 9              | HLA-A*02:01 | 465           | 95             | 0.022069881   | 9.50E+01      | 2.21E-02    | 95          | TRUE         | TRUE              |
| 1     | DYSVLNST   | 351   | 359  | 9              | HLA-A*02:01 | 351           | 96             | 0.022356304   | 9.60E+01      | 2.24E-02    | 96          | TRUE         | TRUE              |
| 1     | TYVTQQLR   | 988   | 996  | 9              | HLA-A*02:01 | 988           | 96             | 0.02262559    | 9.60E+01      | 2.26E-02    | 96          | TRUE         | TRUE              |
| 1     | NTVVDPLQP  | 1117  | 1125 | 9              | HLA-A*02:01 | 1117          | 96             | 0.023019718   | 9.60E+01      | 2.30E-02    | 96          | TRUE         | TRUE              |
| 1     | VSIVTPTGN  | 581   | 589  | 9              | HLA-A*02:01 | 581           | 96             | 0.023227368   | 9.60E+01      | 2.32E-02    | 96          | TRUE         | TRUE              |
| 1     | QSKRVDFCG  | 1018  | 1026 | 9              | HLA-A*02:01 | 1018          | 96             | 0.023323837   | 9.60E+01      | 2.33E-02    | 96          | TRUE         | TRUE              |
| 1     | VVKGGDVRQ  | 388   | 396  | 9              | HLA-A*02:01 | 388           | 96             | 0.02353423    | 9.60E+01      | 2.35E-02    | 96          | TRUE         | TRUE              |
| 1     | DSFVVKGDD  | 385   | 393  | 9              | HLA-A*02:01 | 385           | 96             | 0.023555916   | 9.60E+01      | 2.36E-02    | 96          | TRUE         | TRUE              |
| 1     | TGRQLSLQT  | 980   | 988  | 9              | HLA-A*02:01 | 980           | 96             | 0.02360478    | 9.60E+01      | 2.36E-02    | 96          | TRUE         | TRUE              |
| 1     | THTMIFDNA  | 148   | 156  | 9              | HLA-A*02:01 | 148           | 96             | 0.023680998   | 9.60E+01      | 2.37E-02    | 96          | TRUE         | TRUE              |
| 1     | RYRLRHGKLR | 441   | 449  | 9              | HLA-A*02:01 | 441           | 96             | 0.023746521   | 9.60E+01      | 2.37E-02    | 96          | TRUE         | TRUE              |
| 1     | AAEQDRNTR  | 753   | 761  | 9              | HLA-A*02:01 | 753           | 96             | 0.02396625    | 9.60E+01      | 2.40E-02    | 96          | TRUE         | TRUE              |
| 1     | APGQTGVIA  | 398   | 406  | 9              | HLA-A*02:01 | 398           | 96             | 0.024355665   | 9.60E+01      | 2.44E-02    | 96          | TRUE         | TRUE              |
| 1     | ATVCGPKLS  | 508   | 516  | 9              | HLA-A*02:01 | 508           | 96             | 0.02471724    | 9.60E+01      | 2.47E-02    | 96          | TRUE         | TRUE              |
| 1     | NVPFSPDGK  | 457   | 465  | 9              | HLA-A*02:01 | 457           | 97             | 0.024963185   | 9.70E+01      | 2.50E-02    | 97          | TRUE         | TRUE              |
| 1     | INEVAKNLN  | 1168  | 1176 | 9              | HLA-A*02:01 | 1168          | 97             | 0.0258226     | 9.70E+01      | 2.58E-02    | 97          | TRUE         | TRUE              |
| 1     | LKPTTFMLK  | 257   | 265  | 9              | HLA-A*02:01 | 257           | 97             | 0.026079544   | 9.70E+01      | 2.61E-02    | 97          | TRUE         | TRUE              |
| 1     | TNNVIRACN  | 121   | 129  | 9              | HLA-A*02:01 | 121           | 97             | 0.026730064   | 9.70E+01      | 2.67E-02    | 97          | TRUE         | TRUE              |
| 1     | LGKLQDVVN  | 927   | 935  | 9              | HLA-A*02:01 | 927           | 97             | 0.026804024   | 9.70E+01      | 2.68E-02    | 97          | TRUE         | TRUE              |
| 1     | SFGGVSVIT  | 577   | 585  | 9              | HLA-A*02:01 | 577           | 97             | 0.02697118    | 9.70E+01      | 2.70E-02    | 97          | TRUE         | TRUE              |
| 1     | DVNCDTVST  | 600   | 608  | 9              | HLA-A*02:01 | 600           | 98             | 0.028131961   | 9.80E+01      | 2.81E-02    | 98          | TRUE         | TRUE              |
| 1     | KYRYLRHGK  | 439   | 447  | 9              | HLA-A*02:01 | 439           | 98             | 0.0296142     | 9.80E+01      | 2           |             |              |                   |

| seq # | peptide    | start | end  | peptide length | allele      | peptide index | median binding | comblib_sidney | comblib_sidney | legacy IC50 | legacy rank | scores equal | percentiles equal |
|-------|------------|-------|------|----------------|-------------|---------------|----------------|----------------|----------------|-------------|-------------|--------------|-------------------|
| 1     | VVNIQKEID  | 1158  | 1166 | 9              | HLA-A*02:01 | 1158          | 99             | 0.0352452      | 99             | 0.0352452   | 99          | TRUE         | TRUE              |
| 1     | NYKYRYLRH  | 437   | 445  | 9              | HLA-A*02:01 | 437           | 99             | 0.037792011    | 99             | 0.037792011 | 99          | TRUE         | TRUE              |
| 1     | TFEYISDAF  | 160   | 168  | 9              | HLA-A*02:01 | 160           | 99             | 0.03809781     | 99             | 0.03809781  | 99          | TRUE         | TRUE              |
| 1     | TINHFTGNP  | 71    | 79   | 9              | HLA-A*02:01 | 71            | 99             | 0.038556713    | 99             | 0.038556713 | 99          | TRUE         | TRUE              |
| 1     | LCCMTSCCS  | 1216  | 1224 | 9              | HLA-A*02:01 | 1216          | 99             | 0.03948208     | 99             | 0.03948208  | 99          | TRUE         | TRUE              |
| 1     | GAEHVDTSY  | 638   | 646  | 9              | HLA-A*02:01 | 638           | 100            | 0.04075679     | 100            | 0.04075679  | 100         | TRUE         | TRUE              |
| 1     | ACSCGSCCK  | 1229  | 1237 | 9              | HLA-A*02:01 | 1229          | 100            | 0.04137138     | 100            | 0.04137138  | 100         | TRUE         | TRUE              |
| 1     | DTSYEC DIP | 643   | 651  | 9              | HLA-A*02:01 | 643           | 100            | 0.042589251    | 100            | 0.042589251 | 100         | TRUE         | TRUE              |
| 1     | DNTFVSGNC  | 1100  | 1108 | 9              | HLA-A*02:01 | 1100          | 100            | 0.04584585     | 100            | 0.04584585  | 100         | TRUE         | TRUE              |
| 1     | RCTTFDDVQ  | 18    | 26   | 9              | HLA-A*02:01 | 18            | 100            | 0.045930376    | 100            | 0.045930376 | 100         | TRUE         | TRUE              |
| 1     | LDKYFKNHT  | 1134  | 1142 | 9              | HLA-A*02:01 | 1134          | 100            | 0.04628071     | 100            | 0.04628071  | 100         | TRUE         | TRUE              |
| 1     | EVQIDRLIT  | 972   | 980  | 9              | HLA-A*02:01 | 972           | 100            | 0.04786301     | 100            | 0.04786301  | 100         | TRUE         | TRUE              |
| 1     | NPVVPFKDG  | 78    | 86   | 9              | HLA-A*02:01 | 78            | 100            | 0.04792918     | 100            | 0.04792918  | 100         | TRUE         | TRUE              |
| 1     | LREFVFKNK  | 182   | 190  | 9              | HLA-A*02:01 | 182           | 100            | 0.05066406     | 100            | 0.05066406  | 100         | TRUE         | TRUE              |
| 1     | DSVRDPKTS  | 560   | 568  | 9              | HLA-A*02:01 | 560           | 100            | 0.05546257     | 100            | 0.05546257  | 100         | TRUE         | TRUE              |
| 1     | SEPVLGKVK  | 1243  | 1251 | 9              | HLA-A*02:01 | 1243          | 100            | 0.05679368     | 100            | 0.05679368  | 100         | TRUE         | TRUE              |
| 1     | CCSCLKGAC  | 1222  | 1230 | 9              | HLA-A*02:01 | 1222          | 100            | 0.06218706     | 100            | 0.06218706  | 100         | TRUE         | TRUE              |
| 1     | AICHEGKAY  | 1062  | 1070 | 9              | HLA-A*02:01 | 1062          | 100            | 0.06309573     | 100            | 0.06309573  | 100         | TRUE         | TRUE              |
| 1     | VIPFKDGIY  | 80    | 88   | 9              | HLA-A*02:01 | 80            | 100            | 0.06324119     | 100            | 0.06324119  | 100         | TRUE         | TRUE              |
| 1     | QKEIDRLNE  | 1162  | 1170 | 9              | HLA-A*02:01 | 1162          | 100            | 0.06367955     | 100            | 0.06367955  | 100         | TRUE         | TRUE              |
| 1     | LRPFERDIS  | 448   | 456  | 9              | HLA-A*02:01 | 448           | 100            | 0.09298224     | 100            | 0.09298224  | 100         | TRUE         | TRUE              |
| 1     | YGECLGDIN  | 819   | 827  | 9              | HLA-A*02:01 | 819           | 100            | 0.09981596     | 100            | 0.09981596  | 100         | TRUE         | TRUE              |
| 1     | SFEIDKGIY  | 292   | 300  | 9              | HLA-A*02:01 | 292           | 100            | 0.116654098    | 100            | 0.116654098 | 100         | TRUE         | TRUE              |

| seq # | peptide    | start | end  | peptide length | allele      | peptide index | median binding | mhcnp score | mhcnp percent | legacy score | scores equal |
|-------|------------|-------|------|----------------|-------------|---------------|----------------|-------------|---------------|--------------|--------------|
| 1     | VLNDILSRL  | 958   | 966  | 9              | HLA-A*02:01 | 958           | 0.33           | 0.51407719  | 0.33          | 0.5141       | TRUE         |
| 1     | PLAEKLCV   | 282   | 290  | 9              | HLA-A*02:01 | 282           | 0.38           | 0.50286753  | 0.38          | 0.5029       | TRUE         |
| 1     | TALGKLQDV  | 925   | 933  | 9              | HLA-A*02:01 | 925           | 0.47           | 0.46350682  | 0.47          | 0.4635       | TRUE         |
| 1     | ALGKLQDVV  | 926   | 934  | 9              | HLA-A*02:01 | 926           | 0.78           | 0.38611834  | 0.78          | 0.3861       | TRUE         |
| 1     | FNATKFPVS  | 329   | 337  | 9              | HLA-A*02:01 | 329           | 1.1            | 0.33525533  | 1.1           | 0.3353       | TRUE         |
| 1     | AAPHGVVFL  | 1037  | 1045 | 9              | HLA-A*02:01 | 1037          | 1.5            | 0.29246455  | 1.5           | 0.2925       | TRUE         |
| 1     | ALNTLVKQL  | 940   | 948  | 9              | HLA-A*02:01 | 940           | 1.5            | 0.29198482  | 1.5           | 0.292        | TRUE         |
| 1     | QIAPGQTGV  | 396   | 404  | 9              | HLA-A*02:01 | 396           | 1.6            | 0.29007222  | 1.6           | 0.2901       | TRUE         |
| 1     | GLTVLPPLL  | 839   | 847  | 9              | HLA-A*02:01 | 839           | 1.7            | 0.27685497  | 1.7           | 0.2769       | TRUE         |
| 1     | KEIDRLNEV  | 1163  | 1171 | 9              | HLA-A*02:01 | 1163          | 1.8            | 0.27137281  | 1.8           | 0.2714       | TRUE         |
| 1     | NTLKPIFKL  | 214   | 222  | 9              | HLA-A*02:01 | 214           | 2.5            | 0.21385032  | 2.5           | 0.2139       | TRUE         |
| 1     | GINASVVNI  | 1153  | 1161 | 9              | HLA-A*02:01 | 1153          | 2.5            | 0.20680475  | 2.5           | 0.2068       | TRUE         |
| 1     | NLNESLIDL  | 1174  | 1182 | 9              | HLA-A*02:01 | 1174          | 2.6            | 0.20476932  | 2.6           | 0.2048       | TRUE         |
| 1     | RLNEVAKNL  | 1167  | 1175 | 9              | HLA-A*02:01 | 1167          | 2.6            | 0.20191155  | 2.6           | 0.2019       | TRUE         |
| 1     | LITGRLOSL  | 978   | 986  | 9              | HLA-A*02:01 | 978           | 2.6            | 0.20122544  | 2.6           | 0.2012       | TRUE         |
| 1     | SLIDLQELG  | 1178  | 1186 | 9              | HLA-A*02:01 | 1178          | 2.7            | 0.19946169  | 2.7           | 0.1995       | TRUE         |
| 1     | KLDQDVVNQN | 929   | 937  | 9              | HLA-A*02:01 | 929           | 2.8            | 0.19512198  | 2.8           | 0.1951       | TRUE         |
| 1     | RLDKVEAEV  | 965   | 973  | 9              | HLA-A*02:01 | 965           | 2.9            | 0.19119711  | 2.9           | 0.1912       | TRUE         |
| 1     | VDLGDISGI  | 1146  | 1154 | 9              | HLA-A*02:01 | 1146          | 3.1            | 0.18112875  | 3.1           | 0.1811       | TRUE         |
| 1     | VIADYNYKL  | 404   | 412  | 9              | HLA-A*02:01 | 404           | 3.4            | 0.17094901  | 3.4           | 0.1709       | TRUE         |
| 1     | FKLPLGINI  | 220   | 228  | 9              | HLA-A*02:01 | 220           | 3.6            | 0.16503852  | 3.6           | 0.165        | TRUE         |
| 1     | NIQKEIDRL  | 1160  | 1168 | 9              | HLA-A*02:01 | 1160          | 3.7            | 0.16283848  | 3.7           | 0.1628       | TRUE         |
| 1     | DILSRLDKV  | 961   | 969  | 9              | HLA-A*02:01 | 961           | 3.8            | 0.1612244   | 3.8           | 0.1612       | TRUE         |
| 1     | ILPDPPLKPT | 787   | 795  | 9              | HLA-A*02:01 | 787           | 3.9            | 0.15693814  | 3.9           | 0.1569       | TRUE         |
| 1     | VLYENQKQI  | 897   | 905  | 9              | HLA-A*02:01 | 897           | 3.9            | 0.15581894  | 3.9           | 0.1558       | TRUE         |
| 1     | GIGYQPYRV  | 488   | 496  | 9              | HLA-A*02:01 | 488           | 4.1            | 0.15196815  | 4.1           | 0.152        | TRUE         |
| 1     | GAAQLIPFA  | 873   | 881  | 9              | HLA-A*02:01 | 873           | 4.1            | 0.15024547  | 4.1           | 0.1502       | TRUE         |
| 1     | AISSVLNDI  | 954   | 962  | 9              | HLA-A*02:01 | 954           | 4.5            | 0.14192251  | 4.5           | 0.1419       | TRUE         |
| 1     | NGLTVLPPL  | 838   | 846  | 9              | HLA-A*02:01 | 838           | 4.6            | 0.13818821  | 4.6           | 0.1382       | TRUE         |
| 1     | QILPDPKLP  | 786   | 794  | 9              | HLA-A*02:01 | 786           | 4.6            | 0.1373474   | 4.6           | 0.1373       | TRUE         |
| 1     | RVVPSGDVV  | 306   | 314  | 9              | HLA-A*02:01 | 306           | 4.8            | 0.13038783  | 4.8           | 0.1304       | TRUE         |
| 1     | CLGDINARD  | 822   | 830  | 9              | HLA-A*02:01 | 822           | 5              | 0.12752418  | 5             | 0.1275       | TRUE         |
| 1     | LGDISGINA  | 1148  | 1156 | 9              | HLA-A*02:01 | 1148          | 5.1            | 0.12625269  | 5.1           | 0.1263       | TRUE         |
| 1     | YVTQQLIRA  | 989   | 997  | 9              | HLA-A*02:01 | 989           | 5.1            | 0.12547042  | 5.1           | 0.1255       | TRUE         |
| 1     | ALSGIAAEQ  | 748   | 756  | 9              | HLA-A*02:01 | 748           | 5.4            | 0.12040694  | 5.4           | 0.1204       | TRUE         |
| 1     | FAATEKSNV  | 89    | 97   | 9              | HLA-A*02:01 | 89            | 5.4            | 0.11990187  | 5.4           | 0.1199       | TRUE         |
| 1     | NGIGVTQNV  | 889   | 897  | 9              | HLA-A*02:01 | 889           | 5.6            | 0.11488156  | 5.6           | 0.1149       | TRUE         |
| 1     | FKNHTSPDV  | 1138  | 1146 | 9              | HLA-A*02:01 | 1138          | 5.7            | 0.11402503  | 5.7           | 0.114        | TRUE         |
| 1     | QIQESLTTT  | 915   | 923  | 9              | HLA-A*02:01 | 915           | 5.7            | 0.11271685  | 5.7           | 0.1127       | TRUE         |
| 1     | KQMYKTPTL  | 768   | 776  | 9              | HLA-A*02:01 | 768           | 5.7            | 0.11180853  | 5.7           | 0.1118       | TRUE         |
| 1     | RAAEIRASA  | 996   | 1004 | 9              | HLA-A*02:01 | 996           | 5.8            | 0.11008365  | 5.8           | 0.1101       | TRUE         |
| 1     | AISQIQESL  | 912   | 920  | 9              | HLA-A*02:01 | 912           | 5.9            | 0.10819686  | 5.9           | 0.1082       | TRUE         |
| 1     | AATEKSNVV  | 90    | 98   | 9              | HLA-A*02:01 | 90            | 6.1            | 0.10555933  | 6.1           | 0.1056       | TRUE         |
| 1     | KGYQPIDVV  | 198   | 206  | 9              | HLA-A*02:01 | 198           | 6.1            | 0.10498001  | 6.1           | 0.105        | TRUE         |
| 1     | DISGINASV  | 1150  | 1158 | 9              | HLA-A*02:01 | 1150          | 6.2            | 0.10321196  | 6.2           | 0.1032       | TRUE         |
| 1     | KAISQIQES  | 911   | 919  | 9              | HLA-A*02:01 | 911           | 6.2            | 0.10217242  | 6.2           | 0.1022       | TRUE         |
| 1     | TDVSTAIHA  | 604   | 612  | 9              | HLA-A*02:01 | 604           | 6.3            | 0.10088147  | 6.3           | 0.1009       | TRUE         |
| 1     | LLNAPATVC  | 503   | 511  | 9              | HLA-A*02:01 | 503           | 6.3            | 0.10081947  | 6.3           | 0.1008       | TRUE         |
| 1     | YQPYRVVVL  | 491   | 499  | 9              | HLA-A*02:01 | 491           | 6.4            | 0.09923114  | 6.4           | 0.0992       | TRUE         |
| 1     | LQIPFAMQM  | 876   | 884  | 9              | HLA-A*02:01 | 876           | 6.7            | 0.09569686  | 6.7           | 0.0957       | TRUE         |
| 1     | STAIHADQL  | 607   | 615  | 9              | HLA-A*02:01 | 607           | 6.8            | 0.09487213  | 6.8           | 0.0949       | TRUE         |
| 1     | ELLNAPATV  | 502   | 510  | 9              | HLA-A*02:01 | 502           | 6.8            | 0.09470173  | 6.8           | 0.0947       | TRUE         |
| 1     | PIFKLPLGI  | 218   | 226  | 9              | HLA-A*02:01 | 218           | 7.2            | 0.09102859  | 7.2           | 0.091        | TRUE         |
| 1     | MIFDNAFNC  | 151   | 159  | 9              | HLA-A*02:01 | 151           | 7.2            | 0.09080319  | 7.2           | 0.0908       | TRUE         |
| 1     | FSLDVSEKS  | 168   | 176  | 9              | HLA-A*02:01 | 168           | 7.2            | 0.0904238   | 7.2           | 0.0904       | TRUE         |
| 1     | SMAKTSVDC  | 712   | 720  | 9              | HLA-A*02:01 | 712           | 7.4            | 0.08911998  | 7.4           | 0.0891       | TRUE         |
| 1     | VQIDRLITG  | 973   | 981  | 9              | HLA-A*02:01 | 973           | 7.7            | 0.08457596  | 7.7           | 0.0846       | TRUE         |
| 1     | IINNSTNVV  | 116   | 124  | 9              | HLA-A*02:01 | 116           | 7.8            | 0.0833547   | 7.8           | 0.0834       | TRUE         |
| 1     | AAQLQIPFAM | 874   | 882  | 9              | HLA-A*02:01 | 874           | 7.9            | 0.08136104  | 7.9           | 0.0814       | TRUE         |
| 1     | SNFGAIVSV  | 950   | 958  | 9              | HLA-A*02:01 | 950           | 8              | 0.07974172  | 8             | 0.0797       | TRUE         |
| 1     | SVVNIQKEI  | 1157  | 1165 | 9              | HLA-A*02:01 | 1157          | 8              | 0.07934265  | 8             | 0.0793       | TRUE         |
| 1     | RALSIGIAAE | 747   | 755  | 9              | HLA-A*02:01 | 747           | 8.1            | 0.07921456  | 8.1           | 0.0792       | TRUE         |
| 1     | IAPGQTGVI  | 397   | 405  | 9              | HLA-A*02:01 | 397           | 8.1            | 0.07901827  | 8.1           | 0.079        | TRUE         |
| 1     | FDEDDSEPV  | 1238  | 1246 | 9              | HLA-A*02:01 | 1238          | 8.1            | 0.07882871  | 8.1           | 0.0788       | TRUE         |
| 1     | SLQTYVTQQ  | 985   | 993  | 9              | HLA-A*02:01 | 985           | 8.3            | 0.07729409  | 8.3           | 0.0773       | TRUE         |
| 1     | VRFPNITNL  | 314   | 322  | 9              | HLA-A*02:01 | 314           | 8.5            | 0.07440653  | 8.5           | 0.0744       | TRUE         |
| 1     | IAIPTNFSI  | 694   | 702  | 9              | HLA-A*02:01 | 694           | 8.7            | 0.07231771  | 8.7           | 0.0723       | TRUE         |
| 1     | SITTEVMVPV | 703   | 711  | 9              | HLA-A*02:01 | 703           | 8.7            | 0.07197921  | 8.7           | 0.072        | TRUE         |
| 1     | ILDISPSCF  | 570   | 578  | 9              | HLA-A*02:01 | 570           | 8.9            | 0.07010126  | 8.9           | 0.0701       | TRUE         |
| 1     | TTAPAIICHE | 1058  | 1066 | 9              | HLA-A*02:01 | 1058          | 8.9            | 0.06998456  | 8.9           | 0.07         | TRUE         |
| 1     | YLTQDLFLP  | 53    | 61   | 9              | HLA-A*02:01 | 53            | 9              | 0.06957757  | 9             | 0.0696       | TRUE         |
| 1     | LLFNKVTLA  | 803   | 811  | 9              | HLA-A*02:01 | 803           | 9.3            | 0.06622592  | 9.3           | 0.0662       | TRUE         |
| 1     | RLQSLQTYV  | 982   | 990  | 9              | HLA-A*02:01 | 982           | 9.5            | 0.06518358  | 9.5           | 0.0652       | TRUE         |
| 1     | ALVSGTATA  | 858   | 866  | 9              | HLA-A*02:01 | 858           | 9.6            | 0.06384429  | 9.6           | 0.0638       | TRUE         |
| 1     | ICGDSTECA  | 724   | 732  | 9              | HLA-A*02:01 | 724           | 9.6            | 0.06376547  | 9.6           | 0.0638       | TRUE         |
| 1     | YLKPTTFML  | 256   | 264  | 9              | HLA-A*02:01 | 256           | 9.6            | 0.06342291  | 9.6           | 0.0634       | TRUE         |
| 1     | IINNSTNV   | 115   | 123  | 9              | HLA-A*02:01 | 115           | 9.8            | 0.06232173  | 9.8           | 0.0623       | TRUE         |
| 1     | CSFGGVSVI  | 576   | 584  | 9              | HLA-A*02:01 | 576           | 9.8            | 0.06193857  | 9.8           | 0.0619       | TRUE         |
| 1     | GKPTPPAL   | 464   | 472  | 9              | HLA-A*02:01 | 464           | 9.9            | 0.06161229  | 9.9           | 0.0616       | TRUE         |
| 1     | VVFLHVTYV  | 1042  | 1050 | 9              | HLA-A*02:01 | 1042          | 9.9            | 0.06159169  | 9.9           | 0.0616       | TRUE         |

| seq # | peptide    | start | end  | peptide length | allele      | peptide index | median binding | mhcnp score | mhcnp percent | legacy score | scores equal |
|-------|------------|-------|------|----------------|-------------|---------------|----------------|-------------|---------------|--------------|--------------|
| 1     | GCLGIAEHV  | 634   | 642  | 9              | HLA-A*02:01 | 634           | 10             | 0.06115253  | 10            | 0.0612       | TRUE         |
| 1     | HLMSFPQAA  | 1030  | 1038 | 9              | HLA-A*02:01 | 1030          | 10             | 0.06101688  | 10            | 0.061        | TRUE         |
| 1     | NVFQTOAGC  | 627   | 635  | 9              | HLA-A*02:01 | 627           | 10             | 0.06088079  | 10            | 0.0609       | TRUE         |
| 1     | KLPDDFMGC  | 411   | 419  | 9              | HLA-A*02:01 | 411           | 11             | 0.05778696  | 11            | 0.0578       | TRUE         |
| 1     | SLTTTSTAL  | 919   | 927  | 9              | HLA-A*02:01 | 919           | 11             | 0.05636094  | 11            | 0.0564       | TRUE         |
| 1     | RNFTTAPAI  | 1055  | 1063 | 9              | HLA-A*02:01 | 1055          | 11             | 0.05553359  | 11            | 0.0555       | TRUE         |
| 1     | QLNRALSGI  | 744   | 752  | 9              | HLA-A*02:01 | 744           | 11             | 0.05541972  | 11            | 0.0554       | TRUE         |
| 1     | YICGDSTEC  | 723   | 731  | 9              | HLA-A*02:01 | 723           | 11             | 0.05458271  | 11            | 0.0546       | TRUE         |
| 1     | ESLIDLQEL  | 1177  | 1185 | 9              | HLA-A*02:01 | 1177          | 11             | 0.05365192  | 11            | 0.0537       | TRUE         |
| 1     | RIYSTGNV   | 620   | 628  | 9              | HLA-A*02:01 | 620           | 12             | 0.05246679  | 12            | 0.0525       | TRUE         |
| 1     | TNLCPFGEV  | 320   | 328  | 9              | HLA-A*02:01 | 320           | 12             | 0.05222114  | 12            | 0.0522       | TRUE         |
| 1     | DLLFNKVTL  | 802   | 810  | 9              | HLA-A*02:01 | 802           | 12             | 0.05165107  | 12            | 0.0517       | TRUE         |
| 1     | NLCPFGEVF  | 321   | 329  | 9              | HLA-A*02:01 | 321           | 12             | 0.05052496  | 12            | 0.0505       | TRUE         |
| 1     | VRDPKTSEI  | 562   | 570  | 9              | HLA-A*02:01 | 562           | 12             | 0.04997827  | 12            | 0.05         | TRUE         |
| 1     | FVGYLKPT   | 253   | 261  | 9              | HLA-A*02:01 | 253           | 12             | 0.04936128  | 12            | 0.0494       | TRUE         |
| 1     | FGAGAAIQI  | 870   | 878  | 9              | HLA-A*02:01 | 870           | 12             | 0.04836751  | 12            | 0.0484       | TRUE         |
| 1     | FAVSKPMGT  | 138   | 146  | 9              | HLA-A*02:01 | 138           | 12             | 0.04764157  | 12            | 0.0476       | TRUE         |
| 1     | FPQAAPHGV  | 1034  | 1042 | 9              | HLA-A*02:01 | 1034          | 12             | 0.04748009  | 12            | 0.0475       | TRUE         |
| 1     | LQTYVTQQL  | 986   | 994  | 9              | HLA-A*02:01 | 986           | 12             | 0.04743262  | 12            | 0.0474       | TRUE         |
| 1     | VSATKLNDL  | 369   | 377  | 9              | HLA-A*02:01 | 369           | 13             | 0.04689567  | 13            | 0.0469       | TRUE         |
| 1     | NLAATKMSE  | 1005  | 1013 | 9              | HLA-A*02:01 | 1005          | 13             | 0.04609722  | 13            | 0.0461       | TRUE         |
| 1     | KLRPFERDI  | 447   | 455  | 9              | HLA-A*02:01 | 447           | 13             | 0.04541741  | 13            | 0.0454       | TRUE         |
| 1     | FSQILPDPL  | 784   | 792  | 9              | HLA-A*02:01 | 784           | 13             | 0.04492102  | 13            | 0.0449       | TRUE         |
| 1     | AGLIAIVMV  | 1204  | 1212 | 9              | HLA-A*02:01 | 1204          | 13             | 0.04373221  | 13            | 0.0437       | TRUE         |
| 1     | TQAGCIGA   | 631   | 639  | 9              | HLA-A*02:01 | 631           | 13             | 0.04335869  | 13            | 0.0434       | TRUE         |
| 1     | FIAGLIAIV  | 1202  | 1210 | 9              | HLA-A*02:01 | 1202          | 13             | 0.04313334  | 13            | 0.0431       | TRUE         |
| 1     | FSISITTEV  | 700   | 708  | 9              | HLA-A*02:01 | 700           | 14             | 0.04214322  | 14            | 0.0421       | TRUE         |
| 1     | TVLPPLTLD  | 841   | 849  | 9              | HLA-A*02:01 | 841           | 14             | 0.04209912  | 14            | 0.0421       | TRUE         |
| 1     | RQIAPGQTG  | 395   | 403  | 9              | HLA-A*02:01 | 395           | 14             | 0.04189831  | 14            | 0.0419       | TRUE         |
| 1     | FMLKYDENG  | 262   | 270  | 9              | HLA-A*02:01 | 262           | 14             | 0.04174757  | 14            | 0.0417       | TRUE         |
| 1     | DVSDFTDSV  | 554   | 562  | 9              | HLA-A*02:01 | 554           | 14             | 0.04121724  | 14            | 0.0412       | TRUE         |
| 1     | LLTDDMIAA  | 846   | 854  | 9              | HLA-A*02:01 | 846           | 14             | 0.04097741  | 14            | 0.041        | TRUE         |
| 1     | QQLIRAAEI  | 992   | 1000 | 9              | HLA-A*02:01 | 992           | 14             | 0.03978175  | 14            | 0.0398       | TRUE         |
| 1     | ICAQKFNGI  | 832   | 840  | 9              | HLA-A*02:01 | 832           | 14             | 0.03974132  | 14            | 0.0397       | TRUE         |
| 1     | LQDVVNQNA  | 930   | 938  | 9              | HLA-A*02:01 | 930           | 14             | 0.03934413  | 14            | 0.0393       | TRUE         |
| 1     | FSPDGKPC   | 460   | 468  | 9              | HLA-A*02:01 | 460           | 14             | 0.03915685  | 14            | 0.0392       | TRUE         |
| 1     | ILTAFSPAQ  | 234   | 242  | 9              | HLA-A*02:01 | 234           | 14             | 0.03879547  | 14            | 0.0388       | TRUE         |
| 1     | VYDPLQPEL  | 1119  | 1127 | 9              | HLA-A*02:01 | 1119          | 14             | 0.0387888   | 14            | 0.0388       | TRUE         |
| 1     | LSRLDKVEA  | 963   | 971  | 9              | HLA-A*02:01 | 963           | 14             | 0.03820193  | 14            | 0.0382       | TRUE         |
| 1     | YECDIPIGA  | 646   | 654  | 9              | HLA-A*02:01 | 646           | 14             | 0.0376896   | 14            | 0.0377       | TRUE         |
| 1     | SLDVSEKSG  | 169   | 177  | 9              | HLA-A*02:01 | 169           | 14             | 0.03729119  | 14            | 0.0373       | TRUE         |
| 1     | GIGVTQNVL  | 890   | 898  | 9              | HLA-A*02:01 | 890           | 15             | 0.03691382  | 15            | 0.0369       | TRUE         |
| 1     | SLRSTSQK   | 664   | 672  | 9              | HLA-A*02:01 | 664           | 15             | 0.03684491  | 15            | 0.0368       | TRUE         |
| 1     | GFIAGLIAI  | 1201  | 1209 | 9              | HLA-A*02:01 | 1201          | 15             | 0.03670214  | 15            | 0.0367       | TRUE         |
| 1     | CVLGQSKRV  | 1014  | 1022 | 9              | HLA-A*02:01 | 1014          | 15             | 0.03669704  | 15            | 0.0367       | TRUE         |
| 1     | PMGTQTHTM  | 143   | 151  | 9              | HLA-A*02:01 | 143           | 15             | 0.0363262   | 15            | 0.0363       | TRUE         |
| 1     | TTSTALGKL  | 922   | 930  | 9              | HLA-A*02:01 | 922           | 15             | 0.03590287  | 15            | 0.0359       | TRUE         |
| 1     | SIAYSNNTI  | 686   | 694  | 9              | HLA-A*02:01 | 686           | 15             | 0.03576201  | 15            | 0.0358       | TRUE         |
| 1     | SISITTEVM  | 701   | 709  | 9              | HLA-A*02:01 | 701           | 15             | 0.03553456  | 15            | 0.0355       | TRUE         |
| 1     | ILSLDKVE   | 962   | 970  | 9              | HLA-A*02:01 | 962           | 15             | 0.03528217  | 15            | 0.0353       | TRUE         |
| 1     | SQIQESLTT  | 914   | 922  | 9              | HLA-A*02:01 | 914           | 15             | 0.03522789  | 15            | 0.0352       | TRUE         |
| 1     | QIANQFNKA  | 904   | 912  | 9              | HLA-A*02:01 | 904           | 15             | 0.03506015  | 15            | 0.0351       | TRUE         |
| 1     | CDIPIGAGI  | 648   | 656  | 9              | HLA-A*02:01 | 648           | 15             | 0.03500512  | 15            | 0.035        | TRUE         |
| 1     | CSQNPLAEL  | 278   | 286  | 9              | HLA-A*02:01 | 278           | 15             | 0.03499085  | 15            | 0.035        | TRUE         |
| 1     | GDVVRFPNI  | 311   | 319  | 9              | HLA-A*02:01 | 311           | 15             | 0.03459702  | 15            | 0.0346       | TRUE         |
| 1     | GVSVITPGT  | 580   | 588  | 9              | HLA-A*02:01 | 580           | 15             | 0.03415779  | 15            | 0.0342       | TRUE         |
| 1     | RDLPSPGFNT | 207   | 215  | 9              | HLA-A*02:01 | 207           | 15             | 0.03392293  | 15            | 0.0339       | TRUE         |
| 1     | GDISGINAS  | 1149  | 1157 | 9              | HLA-A*02:01 | 1149          | 15             | 0.03383185  | 15            | 0.0338       | TRUE         |
| 1     | TNASSEVAV  | 588   | 596  | 9              | HLA-A*02:01 | 588           | 16             | 0.03348319  | 16            | 0.0335       | TRUE         |
| 1     | TMNNKSQSV  | 106   | 114  | 9              | HLA-A*02:01 | 106           | 16             | 0.03308691  | 16            | 0.0331       | TRUE         |
| 1     | SRLDKVEAE  | 964   | 972  | 9              | HLA-A*02:01 | 964           | 16             | 0.03281125  | 16            | 0.0328       | TRUE         |
| 1     | AVLYQDVNC  | 595   | 603  | 9              | HLA-A*02:01 | 595           | 16             | 0.03267766  | 16            | 0.0327       | TRUE         |
| 1     | YKLPDDFMG  | 410   | 418  | 9              | HLA-A*02:01 | 410           | 16             | 0.03266822  | 16            | 0.0327       | TRUE         |
| 1     | GLTGTGVLT  | 531   | 539  | 9              | HLA-A*02:01 | 531           | 16             | 0.03251108  | 16            | 0.0325       | TRUE         |
| 1     | KPIFKLPLG  | 217   | 225  | 9              | HLA-A*02:01 | 217           | 16             | 0.03223713  | 16            | 0.0322       | TRUE         |
| 1     | KNKDGFLYV  | 188   | 196  | 9              | HLA-A*02:01 | 188           | 16             | 0.03220487  | 16            | 0.0322       | TRUE         |
| 1     | LAATKMSEC  | 1006  | 1014 | 9              | HLA-A*02:01 | 1006          | 16             | 0.03201939  | 16            | 0.032        | TRUE         |
| 1     | GYQPYRVVV  | 490   | 498  | 9              | HLA-A*02:01 | 490           | 16             | 0.03201046  | 16            | 0.032        | TRUE         |
| 1     | SVLNDILSR  | 957   | 965  | 9              | HLA-A*02:01 | 957           | 16             | 0.03179891  | 16            | 0.0318       | TRUE         |
| 1     | FNGLTGTGV  | 529   | 537  | 9              | HLA-A*02:01 | 529           | 16             | 0.03174122  | 16            | 0.0317       | TRUE         |
| 1     | RLITGRLQS  | 977   | 985  | 9              | HLA-A*02:01 | 977           | 16             | 0.03141117  | 16            | 0.0314       | TRUE         |
| 1     | FRVVPSGDV  | 305   | 313  | 9              | HLA-A*02:01 | 305           | 16             | 0.03103819  | 16            | 0.031        | TRUE         |
| 1     | GDSTECANL  | 726   | 734  | 9              | HLA-A*02:01 | 726           | 16             | 0.03083152  | 16            | 0.0308       | TRUE         |
| 1     | YFPREGVFV  | 1070  | 1078 | 9              | HLA-A*02:01 | 1070          | 16             | 0.03074659  | 16            | 0.0307       | TRUE         |
| 1     | RVVVSFEL   | 495   | 503  | 9              | HLA-A*02:01 | 495           | 17             | 0.03011642  | 17            | 0.0301       | TRUE         |
| 1     | SNVTGFHTI  | 64    | 72   | 9              | HLA-A*02:01 | 64            | 17             | 0.02894373  | 17            | 0.0289       | TRUE         |
| 1     | AGWTFGAGA  | 866   | 874  | 9              | HLA-A*02:01 | 866           | 17             | 0.02848988  | 17            | 0.0285       | TRUE         |
| 1     | LYLTQDLFL  | 52    | 60   | 9              | HLA-A*02:01 | 52            | 17             | 0.02817001  | 17            | 0.0282       | TRUE         |
| 1     | FSPAQDIWG  | 238   | 246  | 9              | HLA-A*02:01 | 238           | 17             | 0.0281237   | 17            | 0.0281       | TRUE         |
| 1     | IAAYTAALV  | 852   | 860  | 9              | HLA-A*02:01 | 852           | 17             | 0.02808748  | 17            | 0.0281       | TRUE         |

| seq # | peptide    | start | end  | peptide length | allele      | peptide index | median binding | mhcnp score | mhcnp percent | legacy score | scores equal |
|-------|------------|-------|------|----------------|-------------|---------------|----------------|-------------|---------------|--------------|--------------|
| 1     | FIEDLLFNK  | 799   | 807  | 9              | HLA-A*02:01 | 799           | 17             | 0.02800397  | 17            | 0.028        | TRUE         |
| 1     | TAPAICHEG  | 1059  | 1067 | 9              | HLA-A*02:01 | 1059          | 17             | 0.02792467  | 17            | 0.0279       | TRUE         |
| 1     | ISSVLNDIL  | 955   | 963  | 9              | HLA-A*02:01 | 955           | 17             | 0.02791205  | 17            | 0.0279       | TRUE         |
| 1     | YADSFVVKG  | 383   | 391  | 9              | HLA-A*02:01 | 383           | 17             | 0.02790394  | 17            | 0.0279       | TRUE         |
| 1     | NASSEVAVL  | 589   | 597  | 9              | HLA-A*02:01 | 589           | 17             | 0.02781321  | 17            | 0.0278       | TRUE         |
| 1     | FAMQMAYRF  | 880   | 888  | 9              | HLA-A*02:01 | 880           | 18             | 0.02690272  | 18            | 0.0269       | TRUE         |
| 1     | VVRDLPSPGF | 205   | 213  | 9              | HLA-A*02:01 | 205           | 18             | 0.02679673  | 18            | 0.0268       | TRUE         |
| 1     | LCDNPFFAV  | 132   | 140  | 9              | HLA-A*02:01 | 132           | 18             | 0.02647     | 18            | 0.0265       | TRUE         |
| 1     | NAQALNTLV  | 937   | 945  | 9              | HLA-A*02:01 | 937           | 18             | 0.02645217  | 18            | 0.0265       | TRUE         |
| 1     | ATKFPSVYA  | 331   | 339  | 9              | HLA-A*02:01 | 331           | 18             | 0.02636774  | 18            | 0.0264       | TRUE         |
| 1     | QAAPHGVVF  | 1036  | 1044 | 9              | HLA-A*02:01 | 1036          | 18             | 0.02591958  | 18            | 0.0259       | TRUE         |
| 1     | FFSPQIITT  | 1091  | 1099 | 9              | HLA-A*02:01 | 1091          | 18             | 0.02567719  | 18            | 0.0257       | TRUE         |
| 1     | AQKFNGTLV  | 834   | 842  | 9              | HLA-A*02:01 | 834           | 18             | 0.02553317  | 18            | 0.0255       | TRUE         |
| 1     | LICAKQFNG  | 831   | 839  | 9              | HLA-A*02:01 | 831           | 18             | 0.02497461  | 18            | 0.025        | TRUE         |
| 1     | FCGKGYVHLM | 1024  | 1032 | 9              | HLA-A*02:01 | 1024          | 18             | 0.0248573   | 18            | 0.0249       | TRUE         |
| 1     | KSFEIDKGI  | 291   | 299  | 9              | HLA-A*02:01 | 291           | 19             | 0.02455531  | 19            | 0.0246       | TRUE         |
| 1     | IGAETHVDS  | 637   | 645  | 9              | HLA-A*02:01 | 637           | 19             | 0.02442338  | 19            | 0.0244       | TRUE         |
| 1     | SVITPGTNA  | 582   | 590  | 9              | HLA-A*02:01 | 582           | 19             | 0.02422274  | 19            | 0.0242       | TRUE         |
| 1     | CPFGEVFNA  | 323   | 331  | 9              | HLA-A*02:01 | 323           | 19             | 0.02415787  | 19            | 0.0242       | TRUE         |
| 1     | QNAQALNTL  | 936   | 944  | 9              | HLA-A*02:01 | 936           | 19             | 0.0237965   | 19            | 0.0238       | TRUE         |
| 1     | GTNASSEVA  | 587   | 595  | 9              | HLA-A*02:01 | 587           | 19             | 0.02368688  | 19            | 0.0237       | TRUE         |
| 1     | NTREVFQAV  | 759   | 767  | 9              | HLA-A*02:01 | 759           | 19             | 0.02300744  | 19            | 0.023        | TRUE         |
| 1     | LKPIFKLPL  | 216   | 224  | 9              | HLA-A*02:01 | 216           | 19             | 0.02294121  | 19            | 0.0229       | TRUE         |
| 1     | GNCDVVGIG  | 1106  | 1114 | 9              | HLA-A*02:01 | 1106          | 19             | 0.02292518  | 19            | 0.0229       | TRUE         |
| 1     | QFNKAISQI  | 908   | 916  | 9              | HLA-A*02:01 | 908           | 19             | 0.0229197   | 19            | 0.0229       | TRUE         |
| 1     | FCTQLNRL   | 741   | 749  | 9              | HLA-A*02:01 | 741           | 19             | 0.02285279  | 19            | 0.0229       | TRUE         |
| 1     | GICASYHTV  | 655   | 663  | 9              | HLA-A*02:01 | 655           | 19             | 0.02277131  | 19            | 0.0228       | TRUE         |
| 1     | IFRSDTLYL  | 46    | 54   | 9              | HLA-A*02:01 | 46            | 20             | 0.02223818  | 20            | 0.0222       | TRUE         |
| 1     | EILDISPCS  | 569   | 577  | 9              | HLA-A*02:01 | 569           | 20             | 0.02210034  | 20            | 0.0221       | TRUE         |
| 1     | DLPSGFNTL  | 208   | 216  | 9              | HLA-A*02:01 | 208           | 20             | 0.02152472  | 20            | 0.0215       | TRUE         |
| 1     | MIAAYTAAL  | 851   | 859  | 9              | HLA-A*02:01 | 851           | 20             | 0.02118779  | 20            | 0.0212       | TRUE         |
| 1     | TLADAGFMK  | 809   | 817  | 9              | HLA-A*02:01 | 809           | 20             | 0.02102401  | 20            | 0.021        | TRUE         |
| 1     | NGLTGTGVL  | 530   | 538  | 9              | HLA-A*02:01 | 530           | 20             | 0.02080947  | 20            | 0.0208       | TRUE         |
| 1     | HLREFVFNK  | 181   | 189  | 9              | HLA-A*02:01 | 181           | 20             | 0.02052212  | 20            | 0.0205       | TRUE         |
| 1     | AGAALQIPF  | 872   | 880  | 9              | HLA-A*02:01 | 872           | 20             | 0.02043646  | 20            | 0.0204       | TRUE         |
| 1     | AVDCSQNPL  | 275   | 283  | 9              | HLA-A*02:01 | 275           | 20             | 0.0202172   | 20            | 0.0202       | TRUE         |
| 1     | LGDINARDL  | 823   | 831  | 9              | HLA-A*02:01 | 823           | 20             | 0.02005371  | 20            | 0.0201       | TRUE         |
| 1     | LIRAAEIRA  | 994   | 1002 | 9              | HLA-A*02:01 | 994           | 20             | 0.01994601  | 20            | 0.0199       | TRUE         |
| 1     | DIWGTSAAA  | 243   | 251  | 9              | HLA-A*02:01 | 243           | 21             | 0.01987477  | 21            | 0.0199       | TRUE         |
| 1     | ELDSFKEEL  | 1126  | 1134 | 9              | HLA-A*02:01 | 1126          | 21             | 0.01985101  | 21            | 0.0199       | TRUE         |
| 1     | ASYHTVSLL  | 658   | 666  | 9              | HLA-A*02:01 | 658           | 21             | 0.01979013  | 21            | 0.0198       | TRUE         |
| 1     | QKFNGTLVL  | 835   | 843  | 9              | HLA-A*02:01 | 835           | 21             | 0.01972665  | 21            | 0.0197       | TRUE         |
| 1     | HTSPDVDLG  | 1141  | 1149 | 9              | HLA-A*02:01 | 1141          | 21             | 0.01957176  | 21            | 0.0196       | TRUE         |
| 1     | KCSVKSFEI  | 287   | 295  | 9              | HLA-A*02:01 | 287           | 21             | 0.01949463  | 21            | 0.0195       | TRUE         |
| 1     | VTQQUIRAA  | 990   | 998  | 9              | HLA-A*02:01 | 990           | 21             | 0.01929848  | 21            | 0.0193       | TRUE         |
| 1     | ISGINASVV  | 1151  | 1159 | 9              | HLA-A*02:01 | 1151          | 21             | 0.01915774  | 21            | 0.0192       | TRUE         |
| 1     | VITPGTNAS  | 583   | 591  | 9              | HLA-A*02:01 | 583           | 21             | 0.01912957  | 21            | 0.0191       | TRUE         |
| 1     | ASVVNIQKE  | 1156  | 1164 | 9              | HLA-A*02:01 | 1156          | 21             | 0.01911961  | 21            | 0.0191       | TRUE         |
| 1     | FLHVTYVPS  | 1044  | 1052 | 9              | HLA-A*02:01 | 1044          | 21             | 0.01894548  | 21            | 0.0189       | TRUE         |
| 1     | INARDLICA  | 826   | 834  | 9              | HLA-A*02:01 | 826           | 21             | 0.01876138  | 21            | 0.0188       | TRUE         |
| 1     | LNAPATVCG  | 504   | 512  | 9              | HLA-A*02:01 | 504           | 21             | 0.01840377  | 21            | 0.0184       | TRUE         |
| 1     | SSIAYSNNNT | 685   | 693  | 9              | HLA-A*02:01 | 685           | 22             | 0.01788019  | 22            | 0.0179       | TRUE         |
| 1     | DQLTPAWRI  | 613   | 621  | 9              | HLA-A*02:01 | 613           | 22             | 0.01766551  | 22            | 0.0177       | TRUE         |
| 1     | STSQKSIVA  | 668   | 676  | 9              | HLA-A*02:01 | 668           | 22             | 0.01762471  | 22            | 0.0176       | TRUE         |
| 1     | VTLADAGFM  | 808   | 816  | 9              | HLA-A*02:01 | 808           | 22             | 0.01748368  | 22            | 0.0175       | TRUE         |
| 1     | VIRACNFEL  | 124   | 132  | 9              | HLA-A*02:01 | 124           | 22             | 0.01744871  | 22            | 0.0174       | TRUE         |
| 1     | KLNDLCFSN  | 373   | 381  | 9              | HLA-A*02:01 | 373           | 22             | 0.01738825  | 22            | 0.0174       | TRUE         |
| 1     | VKGGDVRQI  | 389   | 397  | 9              | HLA-A*02:01 | 389           | 22             | 0.01722438  | 22            | 0.0172       | TRUE         |
| 1     | GGVSVITPG  | 579   | 587  | 9              | HLA-A*02:01 | 579           | 22             | 0.01718567  | 22            | 0.0172       | TRUE         |
| 1     | GAISSVLND  | 953   | 961  | 9              | HLA-A*02:01 | 953           | 22             | 0.01709276  | 22            | 0.0171       | TRUE         |
| 1     | VVNQNAQAL  | 933   | 941  | 9              | HLA-A*02:01 | 933           | 22             | 0.01692469  | 22            | 0.0169       | TRUE         |
| 1     | SLGADSSIA  | 680   | 688  | 9              | HLA-A*02:01 | 680           | 22             | 0.0168714   | 22            | 0.0169       | TRUE         |
| 1     | KMSECVLGQ  | 1010  | 1018 | 9              | HLA-A*02:01 | 1010          | 22             | 0.01675525  | 22            | 0.0168       | TRUE         |
| 1     | ISPCSFGGV  | 573   | 581  | 9              | HLA-A*02:01 | 573           | 23             | 0.01661168  | 23            | 0.0166       | TRUE         |
| 1     | VIGIINNTV  | 1111  | 1119 | 9              | HLA-A*02:01 | 1111          | 23             | 0.01647296  | 23            | 0.0165       | TRUE         |
| 1     | QLSSNFGAI  | 947   | 955  | 9              | HLA-A*02:01 | 947           | 23             | 0.01622457  | 23            | 0.0162       | TRUE         |
| 1     | QIDRLITGR  | 974   | 982  | 9              | HLA-A*02:01 | 974           | 23             | 0.01610823  | 23            | 0.0161       | TRUE         |
| 1     | VFQQTQAGCL | 628   | 636  | 9              | HLA-A*02:01 | 628           | 23             | 0.01604454  | 23            | 0.016        | TRUE         |
| 1     | ISDAFSLDV  | 164   | 172  | 9              | HLA-A*02:01 | 164           | 23             | 0.01599775  | 23            | 0.016        | TRUE         |
| 1     | RDISNVFPS  | 453   | 461  | 9              | HLA-A*02:01 | 453           | 23             | 0.01596777  | 23            | 0.016        | TRUE         |
| 1     | AAAYFVGYL  | 249   | 257  | 9              | HLA-A*02:01 | 249           | 23             | 0.01596434  | 23            | 0.016        | TRUE         |
| 1     | RDPKTSEIL  | 563   | 571  | 9              | HLA-A*02:01 | 563           | 23             | 0.01593452  | 23            | 0.0159       | TRUE         |
| 1     | SFGGVSVIT  | 577   | 585  | 9              | HLA-A*02:01 | 577           | 23             | 0.01582254  | 23            | 0.0158       | TRUE         |
| 1     | TVYDPLQPE  | 1118  | 1126 | 9              | HLA-A*02:01 | 1118          | 23             | 0.01569242  | 23            | 0.0157       | TRUE         |
| 1     | FELLNAPAT  | 501   | 509  | 9              | HLA-A*02:01 | 501           | 23             | 0.01562295  | 23            | 0.0156       | TRUE         |
| 1     | VWLGFIAGL  | 1198  | 1206 | 9              | HLA-A*02:01 | 1198          | 23             | 0.01560447  | 23            | 0.0156       | TRUE         |
| 1     | FKDGIYFAA  | 83    | 91   | 9              | HLA-A*02:01 | 83            | 23             | 0.01557671  | 23            | 0.0156       | TRUE         |
| 1     | QPIDVVRDL  | 201   | 209  | 9              | HLA-A*02:01 | 201           | 23             | 0.01544571  | 23            | 0.0154       | TRUE         |
| 1     | INNSTNVVI  | 117   | 125  | 9              | HLA-A*02:01 | 117           | 24             | 0.01534057  | 24            | 0.0153       | TRUE         |
| 1     | POAAPHGVV  | 1035  | 1043 | 9              | HLA-A*02:01 | 1035          | 24             | 0.01531927  | 24            | 0.0153       | TRUE         |

| seq # | peptide   | start | end  | peptide length | allele      | peptide index | median binding | mhcnp score | mhcnp percent | legacy score | scores equal |
|-------|-----------|-------|------|----------------|-------------|---------------|----------------|-------------|---------------|--------------|--------------|
| 1     | LLQYGSFC  | 734   | 742  | 9              | HLA-A*02:01 | 734           | 24             | 0.01496313  | 24            | 0.015        | TRUE         |
| 1     | GTSAAAYFV | 246   | 254  | 9              | HLA-A*02:01 | 246           | 24             | 0.01487287  | 24            | 0.0149       | TRUE         |
| 1     | ATAGWTFGA | 864   | 872  | 9              | HLA-A*02:01 | 864           | 24             | 0.01482541  | 24            | 0.0148       | TRUE         |
| 1     | AATKMSECV | 1007  | 1015 | 9              | HLA-A*02:01 | 1007          | 24             | 0.01473471  | 24            | 0.0147       | TRUE         |
| 1     | NCTDVSTAI | 602   | 610  | 9              | HLA-A*02:01 | 602           | 24             | 0.01455798  | 24            | 0.0146       | TRUE         |
| 1     | VDCSQNPLA | 276   | 284  | 9              | HLA-A*02:01 | 276           | 24             | 0.01439107  | 24            | 0.0144       | TRUE         |
| 1     | LNDLCSNV  | 374   | 382  | 9              | HLA-A*02:01 | 374           | 24             | 0.0143087   | 24            | 0.0143       | TRUE         |
| 1     | NITNFRAIL | 227   | 235  | 9              | HLA-A*02:01 | 227           | 25             | 0.01397946  | 25            | 0.014        | TRUE         |
| 1     | SIVAYTMSL | 673   | 681  | 9              | HLA-A*02:01 | 673           | 25             | 0.01388064  | 25            | 0.0139       | TRUE         |
| 1     | QMYKTPTLK | 769   | 777  | 9              | HLA-A*02:01 | 769           | 25             | 0.01381722  | 25            | 0.0138       | TRUE         |
| 1     | VLAWNTRNI | 420   | 428  | 9              | HLA-A*02:01 | 420           | 25             | 0.013729    | 25            | 0.0137       | TRUE         |
| 1     | ALQIPFAMQ | 875   | 883  | 9              | HLA-A*02:01 | 875           | 25             | 0.01370487  | 25            | 0.0137       | TRUE         |
| 1     | VLPPLTDD  | 842   | 850  | 9              | HLA-A*02:01 | 842           | 25             | 0.01355058  | 25            | 0.0136       | TRUE         |
| 1     | INHTEGNPV | 72    | 80   | 9              | HLA-A*02:01 | 72            | 25             | 0.01348599  | 25            | 0.0135       | TRUE         |
| 1     | TLVKQLSSN | 943   | 951  | 9              | HLA-A*02:01 | 943           | 25             | 0.01338311  | 25            | 0.0134       | TRUE         |
| 1     | KLPLGINIT | 221   | 229  | 9              | HLA-A*02:01 | 221           | 25             | 0.01330046  | 25            | 0.0133       | TRUE         |
| 1     | FITQRNFFS | 1085  | 1093 | 9              | HLA-A*02:01 | 1085          | 25             | 0.0131508   | 25            | 0.0132       | TRUE         |
| 1     | ATVCGPKLS | 508   | 516  | 9              | HLA-A*02:01 | 508           | 25             | 0.01282446  | 25            | 0.0128       | TRUE         |
| 1     | TAFSPAQDI | 236   | 244  | 9              | HLA-A*02:01 | 236           | 25             | 0.0128045   | 25            | 0.0128       | TRUE         |
| 1     | FVSGNCDVV | 1103  | 1111 | 9              | HLA-A*02:01 | 1103          | 25             | 0.01277531  | 25            | 0.0128       | TRUE         |
| 1     | QMAYRFNGI | 883   | 891  | 9              | HLA-A*02:01 | 883           | 26             | 0.01271456  | 26            | 0.0127       | TRUE         |
| 1     | SGFNLTLPK | 211   | 219  | 9              | HLA-A*02:01 | 211           | 26             | 0.01271147  | 26            | 0.0127       | TRUE         |
| 1     | FGGVSVITP | 578   | 586  | 9              | HLA-A*02:01 | 578           | 26             | 0.01259601  | 26            | 0.0126       | TRUE         |
| 1     | YQPIDVVRD | 200   | 208  | 9              | HLA-A*02:01 | 200           | 26             | 0.01254809  | 26            | 0.0125       | TRUE         |
| 1     | DFCGKGYHL | 1023  | 1031 | 9              | HLA-A*02:01 | 1023          | 26             | 0.01252217  | 26            | 0.0125       | TRUE         |
| 1     | SQILPDLK  | 785   | 793  | 9              | HLA-A*02:01 | 785           | 26             | 0.01225731  | 26            | 0.0123       | TRUE         |
| 1     | PVIFPKDGI | 79    | 87   | 9              | HLA-A*02:01 | 79            | 26             | 0.01219421  | 26            | 0.0122       | TRUE         |
| 1     | IDVVRDLPS | 203   | 211  | 9              | HLA-A*02:01 | 203           | 26             | 0.01215049  | 26            | 0.0122       | TRUE         |
| 1     | GKLQDVVNO | 928   | 936  | 9              | HLA-A*02:01 | 928           | 26             | 0.01213285  | 26            | 0.0121       | TRUE         |
| 1     | IEDLLFNKV | 800   | 808  | 9              | HLA-A*02:01 | 800           | 26             | 0.01208866  | 26            | 0.0121       | TRUE         |
| 1     | TVCGPKLST | 509   | 517  | 9              | HLA-A*02:01 | 509           | 26             | 0.01200127  | 26            | 0.012        | TRUE         |
| 1     | ICHEGKAYF | 1063  | 1071 | 9              | HLA-A*02:01 | 1063          | 26             | 0.01197389  | 26            | 0.012        | TRUE         |
| 1     | VVIGIINNT | 1110  | 1118 | 9              | HLA-A*02:01 | 1110          | 26             | 0.01192658  | 26            | 0.0119       | TRUE         |
| 1     | SNVPFSPDG | 456   | 464  | 9              | HLA-A*02:01 | 456           | 26             | 0.01190066  | 26            | 0.0119       | TRUE         |
| 1     | SFCTQLNRA | 740   | 748  | 9              | HLA-A*02:01 | 740           | 27             | 0.01177413  | 27            | 0.0118       | TRUE         |
| 1     | KQLSSNFGA | 946   | 954  | 9              | HLA-A*02:01 | 946           | 27             | 0.01166619  | 27            | 0.0117       | TRUE         |
| 1     | STALGLQD  | 924   | 932  | 9              | HLA-A*02:01 | 924           | 27             | 0.01162204  | 27            | 0.0116       | TRUE         |
| 1     | IGYQPYRVV | 489   | 497  | 9              | HLA-A*02:01 | 489           | 27             | 0.01151306  | 27            | 0.0115       | TRUE         |
| 1     | LQSLQTYVT | 983   | 991  | 9              | HLA-A*02:01 | 983           | 27             | 0.01149182  | 27            | 0.0115       | TRUE         |
| 1     | FGNPVIFPK | 76    | 84   | 9              | HLA-A*02:01 | 76            | 27             | 0.01148888  | 27            | 0.0115       | TRUE         |
| 1     | FDDVQAPNY | 22    | 30   | 9              | HLA-A*02:01 | 22            | 27             | 0.01145466  | 27            | 0.0115       | TRUE         |
| 1     | RFPNITNLC | 315   | 323  | 9              | HLA-A*02:01 | 315           | 27             | 0.0113801   | 27            | 0.0114       | TRUE         |
| 1     | AQDIWGTSA | 241   | 249  | 9              | HLA-A*02:01 | 241           | 27             | 0.01123569  | 27            | 0.0112       | TRUE         |
| 1     | LIGAEHVDI | 636   | 644  | 9              | HLA-A*02:01 | 636           | 27             | 0.01100667  | 27            | 0.011        | TRUE         |
| 1     | VLSFELLNA | 498   | 506  | 9              | HLA-A*02:01 | 498           | 27             | 0.01090517  | 27            | 0.0109       | TRUE         |
| 1     | GADSSIAYS | 682   | 690  | 9              | HLA-A*02:01 | 682           | 28             | 0.01081139  | 28            | 0.0108       | TRUE         |
| 1     | TQLNRALSG | 743   | 751  | 9              | HLA-A*02:01 | 743           | 28             | 0.01059551  | 28            | 0.0106       | TRUE         |
| 1     | PATVCGPKL | 507   | 515  | 9              | HLA-A*02:01 | 507           | 28             | 0.01044298  | 28            | 0.0104       | TRUE         |
| 1     | VVLSFELL  | 496   | 504  | 9              | HLA-A*02:01 | 496           | 28             | 0.01041929  | 28            | 0.0104       | TRUE         |
| 1     | KGACSCGSC | 1227  | 1235 | 9              | HLA-A*02:01 | 1227          | 28             | 0.01035352  | 28            | 0.0104       | TRUE         |
| 1     | FTTAPAICH | 1057  | 1065 | 9              | HLA-A*02:01 | 1057          | 28             | 0.01032523  | 28            | 0.0103       | TRUE         |
| 1     | DVVRDLPSG | 204   | 212  | 9              | HLA-A*02:01 | 204           | 28             | 0.01029319  | 28            | 0.0103       | TRUE         |
| 1     | GTGVLTPSS | 534   | 542  | 9              | HLA-A*02:01 | 534           | 28             | 0.01020623  | 28            | 0.0102       | TRUE         |
| 1     | SCLKGACSC | 1224  | 1232 | 9              | HLA-A*02:01 | 1224          | 28             | 0.01015442  | 28            | 0.0102       | TRUE         |
| 1     | IDRLITGRL | 975   | 983  | 9              | HLA-A*02:01 | 975           | 28             | 0.01015266  | 28            | 0.0102       | TRUE         |
| 1     | KLSTDLIKN | 514   | 522  | 9              | HLA-A*02:01 | 514           | 28             | 0.01011159  | 28            | 0.0101       | TRUE         |
| 1     | AILTAFSPA | 233   | 241  | 9              | HLA-A*02:01 | 233           | 28             | 0.0101116   | 28            | 0.0101       | TRUE         |
| 1     | QRNFFSPQI | 1088  | 1096 | 9              | HLA-A*02:01 | 1088          | 28             | 0.01010091  | 28            | 0.0101       | TRUE         |
| 1     | GINITNFRA | 225   | 233  | 9              | HLA-A*02:01 | 225           | 29             | 0.00981933  | 29            | 0.0098       | TRUE         |
| 1     | LLRSTSQKS | 665   | 673  | 9              | HLA-A*02:01 | 665           | 29             | 0.00976841  | 29            | 0.0098       | TRUE         |
| 1     | FFAVSKPMG | 137   | 145  | 9              | HLA-A*02:01 | 137           | 29             | 0.0097319   | 29            | 0.0097       | TRUE         |
| 1     | KAYFPREGV | 1068  | 1076 | 9              | HLA-A*02:01 | 1068          | 29             | 0.00970626  | 29            | 0.0097       | TRUE         |
| 1     | SNFRVVPVG | 303   | 311  | 9              | HLA-A*02:01 | 303           | 29             | 0.00966384  | 29            | 0.0097       | TRUE         |
| 1     | GQSKRVDFC | 1017  | 1025 | 9              | HLA-A*02:01 | 1017          | 29             | 0.00950639  | 29            | 0.0095       | TRUE         |
| 1     | YKGYQPIDV | 197   | 205  | 9              | HLA-A*02:01 | 197           | 29             | 0.00949912  | 29            | 0.0095       | TRUE         |
| 1     | GDINARDLI | 824   | 832  | 9              | HLA-A*02:01 | 824           | 29             | 0.00940809  | 29            | 0.0094       | TRUE         |
| 1     | AIVMVTILL | 1208  | 1216 | 9              | HLA-A*02:01 | 1208          | 29             | 0.00924518  | 29            | 0.0092       | TRUE         |
| 1     | PCSFGGVSV | 575   | 583  | 9              | HLA-A*02:01 | 575           | 29             | 0.00923068  | 29            | 0.0092       | TRUE         |
| 1     | CLIGAEHVD | 635   | 643  | 9              | HLA-A*02:01 | 635           | 30             | 0.00917423  | 30            | 0.0092       | TRUE         |
| 1     | YHLMSPFQA | 1029  | 1037 | 9              | HLA-A*02:01 | 1029          | 30             | 0.00902178  | 30            | 0.009        | TRUE         |
| 1     | FLFLTLTSS | 4     | 12   | 9              | HLA-A*02:01 | 4             | 30             | 0.00896111  | 30            | 0.009        | TRUE         |
| 1     | QDIWGTSA  | 242   | 250  | 9              | HLA-A*02:01 | 242           | 30             | 0.00891994  | 30            | 0.0089       | TRUE         |
| 1     | GLIAIVMT  | 1205  | 1213 | 9              | HLA-A*02:01 | 1205          | 30             | 0.00890949  | 30            | 0.0089       | TRUE         |
| 1     | IHADQLTPA | 610   | 618  | 9              | HLA-A*02:01 | 610           | 30             | 0.00888038  | 30            | 0.0089       | TRUE         |
| 1     | GGFNFSQIL | 780   | 788  | 9              | HLA-A*02:01 | 780           | 30             | 0.00883929  | 30            | 0.0088       | TRUE         |
| 1     | SFVVKGDDV | 386   | 394  | 9              | HLA-A*02:01 | 386           | 30             | 0.00883671  | 30            | 0.0088       | TRUE         |
| 1     | IANQFNKAI | 905   | 913  | 9              | HLA-A*02:01 | 905           | 30             | 0.00880562  | 30            | 0.0088       | TRUE         |
| 1     | QALNTLVKQ | 939   | 947  | 9              | HLA-A*02:01 | 939           | 30             | 0.00879749  | 30            | 0.0088       | TRUE         |
| 1     | FSTFKCYGV | 361   | 369  | 9              | HLA-A*02:01 | 361           | 30             | 0.00877171  | 30            | 0.0088       | TRUE         |
| 1     | PLNDYGFYT | 477   | 485  | 9              | HLA-A*02:01 | 477           | 30             | 0.00875248  | 30            | 0.0088       | TRUE         |

| seq # | peptide   | start | end  | peptide length | allele      | peptide index | median binding | mhcnp score | mhcnp percent | legacy score | scores equal |
|-------|-----------|-------|------|----------------|-------------|---------------|----------------|-------------|---------------|--------------|--------------|
| 1     | LTVLPPLLT | 840   | 848  | 9              | HLA-A*02:01 | 840           | 30             | 0.00872291  | 30            | 0.0087       | TRUE         |
| 1     | LIAIVMVTI | 1206  | 1214 | 9              | HLA-A*02:01 | 1206          | 30             | 0.0086815   | 30            | 0.0087       | TRUE         |
| 1     | QQFGRDVS  | 549   | 557  | 9              | HLA-A*02:01 | 549           | 30             | 0.00865262  | 30            | 0.0087       | TRUE         |
| 1     | NIDATSTGN | 427   | 435  | 9              | HLA-A*02:01 | 427           | 30             | 0.00865043  | 30            | 0.0087       | TRUE         |
| 1     | LVSQTATAG | 859   | 867  | 9              | HLA-A*02:01 | 859           | 30             | 0.00862314  | 30            | 0.0086       | TRUE         |
| 1     | SATKLNDLC | 370   | 378  | 9              | HLA-A*02:01 | 370           | 30             | 0.00860075  | 30            | 0.0086       | TRUE         |
| 1     | TDLIKNQCV | 517   | 525  | 9              | HLA-A*02:01 | 517           | 30             | 0.00860023  | 30            | 0.0086       | TRUE         |
| 1     | VLQDVNCT  | 596   | 604  | 9              | HLA-A*02:01 | 596           | 30             | 0.00856329  | 30            | 0.0086       | TRUE         |
| 1     | FKHLREFVF | 179   | 187  | 9              | HLA-A*02:01 | 179           | 31             | 0.0083979   | 31            | 0.0084       | TRUE         |
| 1     | FGGFNFSQL | 779   | 787  | 9              | HLA-A*02:01 | 779           | 31             | 0.00837235  | 31            | 0.0084       | TRUE         |
| 1     | RNIDATSTG | 426   | 434  | 9              | HLA-A*02:01 | 426           | 31             | 0.00835402  | 31            | 0.0084       | TRUE         |
| 1     | VLTPSSKRF | 537   | 545  | 9              | HLA-A*02:01 | 537           | 31             | 0.00834298  | 31            | 0.0083       | TRUE         |
| 1     | FIFLLFLT  | 2     | 10   | 9              | HLA-A*02:01 | 2             | 31             | 0.00833317  | 31            | 0.0083       | TRUE         |
| 1     | YFVGYLKPT | 252   | 260  | 9              | HLA-A*02:01 | 252           | 31             | 0.00832012  | 31            | 0.0083       | TRUE         |
| 1     | KPMGTQTH  | 142   | 150  | 9              | HLA-A*02:01 | 142           | 31             | 0.00812409  | 31            | 0.0081       | TRUE         |
| 1     | TGFHTINHT | 67    | 75   | 9              | HLA-A*02:01 | 67            | 31             | 0.00809189  | 31            | 0.0081       | TRUE         |
| 1     | TAALVSGTA | 856   | 864  | 9              | HLA-A*02:01 | 856           | 31             | 0.00805026  | 31            | 0.0081       | TRUE         |
| 1     | CVADYSVLY | 348   | 356  | 9              | HLA-A*02:01 | 348           | 31             | 0.00804591  | 31            | 0.008        | TRUE         |
| 1     | NKAISQIQE | 910   | 918  | 9              | HLA-A*02:01 | 910           | 31             | 0.00795087  | 31            | 0.008        | TRUE         |
| 1     | IAAEQDRNT | 752   | 760  | 9              | HLA-A*02:01 | 752           | 31             | 0.0079451   | 31            | 0.0079       | TRUE         |
| 1     | RGVYYPDEI | 38    | 46   | 9              | HLA-A*02:01 | 38            | 31             | 0.00794499  | 31            | 0.0079       | TRUE         |
| 1     | VSMAKTSVD | 711   | 719  | 9              | HLA-A*02:01 | 711           | 31             | 0.00794141  | 31            | 0.0079       | TRUE         |
| 1     | EVFAQVKQM | 762   | 770  | 9              | HLA-A*02:01 | 762           | 31             | 0.0079304   | 31            | 0.0079       | TRUE         |
| 1     | GTITDAVDC | 270   | 278  | 9              | HLA-A*02:01 | 270           | 31             | 0.00792372  | 31            | 0.0079       | TRUE         |
| 1     | FNGLTVLPP | 837   | 845  | 9              | HLA-A*02:01 | 837           | 32             | 0.00788599  | 32            | 0.0079       | TRUE         |
| 1     | FQTQAGCLI | 629   | 637  | 9              | HLA-A*02:01 | 629           | 32             | 0.00788103  | 32            | 0.0079       | TRUE         |
| 1     | FNKVTLADA | 805   | 813  | 9              | HLA-A*02:01 | 805           | 32             | 0.00785367  | 32            | 0.0079       | TRUE         |
| 1     | PLQPELDSF | 1122  | 1130 | 9              | HLA-A*02:01 | 1122          | 32             | 0.00776788  | 32            | 0.0078       | TRUE         |
| 1     | LLFLTLSG  | 5     | 13   | 9              | HLA-A*02:01 | 5             | 32             | 0.00775336  | 32            | 0.0078       | TRUE         |
| 1     | FLTLSGSD  | 7     | 15   | 9              | HLA-A*02:01 | 7             | 32             | 0.007708    | 32            | 0.0077       | TRUE         |
| 1     | LTAFAQAQD | 235   | 243  | 9              | HLA-A*02:01 | 235           | 32             | 0.00768856  | 32            | 0.0077       | TRUE         |
| 1     | CASYHTVSL | 657   | 665  | 9              | HLA-A*02:01 | 657           | 32             | 0.0075833   | 32            | 0.0076       | TRUE         |
| 1     | MQMAYRFNG | 882   | 890  | 9              | HLA-A*02:01 | 882           | 32             | 0.00755945  | 32            | 0.0076       | TRUE         |
| 1     | KGDDVRQIA | 390   | 398  | 9              | HLA-A*02:01 | 390           | 32             | 0.00752129  | 32            | 0.0075       | TRUE         |
| 1     | YTAALVSGT | 855   | 863  | 9              | HLA-A*02:01 | 855           | 32             | 0.00749244  | 32            | 0.0075       | TRUE         |
| 1     | MGTQTHTMI | 144   | 152  | 9              | HLA-A*02:01 | 144           | 32             | 0.00747123  | 32            | 0.0075       | TRUE         |
| 1     | QIPFAMQMA | 877   | 885  | 9              | HLA-A*02:01 | 877           | 32             | 0.00747099  | 32            | 0.0075       | TRUE         |
| 1     | ISQIQESLT | 913   | 921  | 9              | HLA-A*02:01 | 913           | 32             | 0.00747059  | 32            | 0.0075       | TRUE         |
| 1     | TLYLTQDLF | 51    | 59   | 9              | HLA-A*02:01 | 51            | 33             | 0.0074508   | 33            | 0.0075       | TRUE         |
| 1     | IPIGAGICA | 650   | 658  | 9              | HLA-A*02:01 | 650           | 33             | 0.00736303  | 33            | 0.0074       | TRUE         |
| 1     | VSLLRSTSQ | 663   | 671  | 9              | HLA-A*02:01 | 663           | 33             | 0.00725005  | 33            | 0.0073       | TRUE         |
| 1     | ITNLCPFGE | 319   | 327  | 9              | HLA-A*02:01 | 319           | 33             | 0.00710245  | 33            | 0.0071       | TRUE         |
| 1     | KFNGLTVLP | 836   | 844  | 9              | HLA-A*02:01 | 836           | 34             | 0.00690679  | 34            | 0.0069       | TRUE         |
| 1     | TNFRALITA | 229   | 237  | 9              | HLA-A*02:01 | 229           | 34             | 0.00690191  | 34            | 0.0069       | TRUE         |
| 1     | VAKNLNESL | 1171  | 1179 | 9              | HLA-A*02:01 | 1171          | 34             | 0.00686623  | 34            | 0.0069       | TRUE         |
| 1     | LFLPFYSNV | 58    | 66   | 9              | HLA-A*02:01 | 58            | 34             | 0.0067611   | 34            | 0.0068       | TRUE         |
| 1     | RSFIEDLLF | 797   | 805  | 9              | HLA-A*02:01 | 797           | 34             | 0.00664436  | 34            | 0.0066       | TRUE         |
| 1     | TITDAVDCS | 271   | 279  | 9              | HLA-A*02:01 | 271           | 34             | 0.0065892   | 34            | 0.0066       | TRUE         |
| 1     | AEIRASANL | 998   | 1006 | 9              | HLA-A*02:01 | 998           | 34             | 0.00657345  | 34            | 0.0066       | TRUE         |
| 1     | LADAGFMKQ | 810   | 818  | 9              | HLA-A*02:01 | 810           | 34             | 0.00651781  | 34            | 0.0065       | TRUE         |
| 1     | LIDLQELGK | 1179  | 1187 | 9              | HLA-A*02:01 | 1179          | 34             | 0.00650562  | 34            | 0.0065       | TRUE         |
| 1     | AALVSGTAT | 857   | 865  | 9              | HLA-A*02:01 | 857           | 34             | 0.00649626  | 34            | 0.0065       | TRUE         |
| 1     | YSNVTFGHT | 63    | 71   | 9              | HLA-A*02:01 | 63            | 34             | 0.00641215  | 34            | 0.0064       | TRUE         |
| 1     | FVVKGDDVR | 387   | 395  | 9              | HLA-A*02:01 | 387           | 35             | 0.00630775  | 35            | 0.0063       | TRUE         |
| 1     | IVMVTILLC | 1209  | 1217 | 9              | HLA-A*02:01 | 1209          | 35             | 0.00628627  | 35            | 0.0063       | TRUE         |
| 1     | TGIGYQPYR | 487   | 495  | 9              | HLA-A*02:01 | 487           | 35             | 0.00625896  | 35            | 0.0063       | TRUE         |
| 1     | FNFNGLTGT | 527   | 535  | 9              | HLA-A*02:01 | 527           | 35             | 0.00624886  | 35            | 0.0062       | TRUE         |
| 1     | YVYKGYQPI | 195   | 203  | 9              | HLA-A*02:01 | 195           | 35             | 0.00621912  | 35            | 0.0062       | TRUE         |
| 1     | VNCTDVSTA | 601   | 609  | 9              | HLA-A*02:01 | 601           | 35             | 0.00616646  | 35            | 0.0062       | TRUE         |
| 1     | PIGAGICAS | 651   | 659  | 9              | HLA-A*02:01 | 651           | 35             | 0.00616509  | 35            | 0.0062       | TRUE         |
| 1     | RNFFSPQII | 1089  | 1097 | 9              | HLA-A*02:01 | 1089          | 35             | 0.00610026  | 35            | 0.0061       | TRUE         |
| 1     | RSTSQKSIV | 667   | 675  | 9              | HLA-A*02:01 | 667           | 35             | 0.00608648  | 35            | 0.0061       | TRUE         |
| 1     | WLGFIAGLI | 1199  | 1207 | 9              | HLA-A*02:01 | 1199          | 35             | 0.0060791   | 35            | 0.0061       | TRUE         |
| 1     | QAPNYTQHT | 26    | 34   | 9              | HLA-A*02:01 | 26            | 36             | 0.00588469  | 36            | 0.0059       | TRUE         |
| 1     | YYPDEIFRS | 41    | 49   | 9              | HLA-A*02:01 | 41            | 36             | 0.00586357  | 36            | 0.0059       | TRUE         |
| 1     | DSEPVLKGV | 1242  | 1250 | 9              | HLA-A*02:01 | 1242          | 36             | 0.00578695  | 36            | 0.0058       | TRUE         |
| 1     | TSGSDLDR  | 11    | 19   | 9              | HLA-A*02:01 | 11            | 36             | 0.00576403  | 36            | 0.0058       | TRUE         |
| 1     | DKVEAEVQI | 967   | 975  | 9              | HLA-A*02:01 | 967           | 36             | 0.0057144   | 36            | 0.0057       | TRUE         |
| 1     | NVYADSVV  | 381   | 389  | 9              | HLA-A*02:01 | 381           | 36             | 0.00567733  | 36            | 0.0057       | TRUE         |
| 1     | FNGIGVTQN | 888   | 896  | 9              | HLA-A*02:01 | 888           | 36             | 0.0056413   | 36            | 0.0056       | TRUE         |
| 1     | DLGDISGIN | 1147  | 1155 | 9              | HLA-A*02:01 | 1147          | 36             | 0.00563928  | 36            | 0.0056       | TRUE         |
| 1     | NSTNVVIRA | 119   | 127  | 9              | HLA-A*02:01 | 119           | 36             | 0.00561856  | 36            | 0.0056       | TRUE         |
| 1     | MSLGADSSI | 679   | 687  | 9              | HLA-A*02:01 | 679           | 36             | 0.00558695  | 36            | 0.0056       | TRUE         |
| 1     | VLKGVKLHY | 1246  | 1254 | 9              | HLA-A*02:01 | 1246          | 36             | 0.00558317  | 36            | 0.0056       | TRUE         |
| 1     | ITNFRALIT | 228   | 236  | 9              | HLA-A*02:01 | 228           | 37             | 0.0055312   | 37            | 0.0055       | TRUE         |
| 1     | EIDRLNEVA | 1164  | 1172 | 9              | HLA-A*02:01 | 1164          | 37             | 0.00550787  | 37            | 0.0055       | TRUE         |
| 1     | TLKPIFKLP | 215   | 223  | 9              | HLA-A*02:01 | 215           | 37             | 0.00549087  | 37            | 0.0055       | TRUE         |
| 1     | IRAAEIRAS | 995   | 1003 | 9              | HLA-A*02:01 | 995           | 37             | 0.00533312  | 37            | 0.0053       | TRUE         |
| 1     | NFGAISSSL | 951   | 959  | 9              | HLA-A*02:01 | 951           | 37             | 0.00526775  | 37            | 0.0053       | TRUE         |
| 1     | NQNAQALNT | 935   | 943  | 9              | HLA-A*02:01 | 935           | 38             | 0.00523108  | 38            | 0.0052       | TRUE         |

| seq # | peptide    | start | end  | peptide length | allele      | peptide index | median binding | mhcnp score | mhcnp percent | legacy score | scores equal |
|-------|------------|-------|------|----------------|-------------|---------------|----------------|-------------|---------------|--------------|--------------|
| 1     | TDSDVRDPKT | 559   | 567  | 9              | HLA-A*02:01 | 559           | 38             | 0.00521063  | 38            | 0.0052       | TRUE         |
| 1     | NAPATVCGP  | 505   | 513  | 9              | HLA-A*02:01 | 505           | 38             | 0.00517233  | 38            | 0.0052       | TRUE         |
| 1     | DINARDLIC  | 825   | 833  | 9              | HLA-A*02:01 | 825           | 38             | 0.00517118  | 38            | 0.0052       | TRUE         |
| 1     | GVSATKLND  | 368   | 376  | 9              | HLA-A*02:01 | 368           | 38             | 0.00514523  | 38            | 0.0051       | TRUE         |
| 1     | SNCVADYSV  | 346   | 354  | 9              | HLA-A*02:01 | 346           | 38             | 0.00512879  | 38            | 0.0051       | TRUE         |
| 1     | GECGLGDINA | 820   | 828  | 9              | HLA-A*02:01 | 820           | 38             | 0.00509687  | 38            | 0.0051       | TRUE         |
| 1     | YQTSNFRVV  | 300   | 308  | 9              | HLA-A*02:01 | 300           | 38             | 0.00509146  | 38            | 0.0051       | TRUE         |
| 1     | YQDVNCTDV  | 598   | 606  | 9              | HLA-A*02:01 | 598           | 38             | 0.00491401  | 38            | 0.0049       | TRUE         |
| 1     | NRALSGIAA  | 746   | 754  | 9              | HLA-A*02:01 | 746           | 38             | 0.0048998   | 38            | 0.0049       | TRUE         |
| 1     | GVTQNVLYE  | 892   | 900  | 9              | HLA-A*02:01 | 892           | 38             | 0.00489232  | 38            | 0.0049       | TRUE         |
| 1     | NLLQYGSF   | 733   | 741  | 9              | HLA-A*02:01 | 733           | 39             | 0.00478516  | 39            | 0.0048       | TRUE         |
| 1     | LKYDENGTI  | 264   | 272  | 9              | HLA-A*02:01 | 264           | 39             | 0.00478077  | 39            | 0.0048       | TRUE         |
| 1     | VADYSVLN   | 349   | 357  | 9              | HLA-A*02:01 | 349           | 39             | 0.00477431  | 39            | 0.0048       | TRUE         |
| 1     | AIHADQLTP  | 609   | 617  | 9              | HLA-A*02:01 | 609           | 39             | 0.00477132  | 39            | 0.0048       | TRUE         |
| 1     | PCTPPALNC  | 466   | 474  | 9              | HLA-A*02:01 | 466           | 39             | 0.00474026  | 39            | 0.0047       | TRUE         |
| 1     | SFELLNAPA  | 500   | 508  | 9              | HLA-A*02:01 | 500           | 39             | 0.00473721  | 39            | 0.0047       | TRUE         |
| 1     | GIAAEQDRN  | 751   | 759  | 9              | HLA-A*02:01 | 751           | 39             | 0.00473217  | 39            | 0.0047       | TRUE         |
| 1     | SVRDPKTSE  | 561   | 569  | 9              | HLA-A*02:01 | 561           | 39             | 0.00471888  | 39            | 0.0047       | TRUE         |
| 1     | QNPLAELKC  | 280   | 288  | 9              | HLA-A*02:01 | 280           | 39             | 0.00471231  | 39            | 0.0047       | TRUE         |
| 1     | IKWVPWYVWL | 1192  | 1200 | 9              | HLA-A*02:01 | 1192          | 39             | 0.0046977   | 39            | 0.0047       | TRUE         |
| 1     | YVWLGFIAI  | 1197  | 1205 | 9              | HLA-A*02:01 | 1197          | 39             | 0.0046895   | 39            | 0.0047       | TRUE         |
| 1     | LTTSTALG   | 920   | 928  | 9              | HLA-A*02:01 | 920           | 39             | 0.00468272  | 39            | 0.0047       | TRUE         |
| 1     | TIAPTNTFS  | 693   | 701  | 9              | HLA-A*02:01 | 693           | 39             | 0.00467624  | 39            | 0.0047       | TRUE         |
| 1     | YGFYTTTGI  | 481   | 489  | 9              | HLA-A*02:01 | 481           | 39             | 0.00466102  | 39            | 0.0047       | TRUE         |
| 1     | TKFPSVYAW  | 332   | 340  | 9              | HLA-A*02:01 | 332           | 39             | 0.00459948  | 39            | 0.0046       | TRUE         |
| 1     | ITPGTNASS  | 584   | 592  | 9              | HLA-A*02:01 | 584           | 39             | 0.00455426  | 39            | 0.0046       | TRUE         |
| 1     | VRQIAPGQT  | 394   | 402  | 9              | HLA-A*02:01 | 394           | 39             | 0.00455276  | 39            | 0.0046       | TRUE         |
| 1     | LTLTSGSDL  | 8     | 16   | 9              | HLA-A*02:01 | 8             | 40             | 0.00449136  | 40            | 0.0045       | TRUE         |
| 1     | HVTVVPSQE  | 1046  | 1054 | 9              | HLA-A*02:01 | 1046          | 40             | 0.00440656  | 40            | 0.0044       | TRUE         |
| 1     | QTYVTQULI  | 987   | 995  | 9              | HLA-A*02:01 | 987           | 40             | 0.00440481  | 40            | 0.0044       | TRUE         |
| 1     | IQESLTTTS  | 916   | 924  | 9              | HLA-A*02:01 | 916           | 40             | 0.00438256  | 40            | 0.0044       | TRUE         |
| 1     | TAIHADQLT  | 608   | 616  | 9              | HLA-A*02:01 | 608           | 40             | 0.00437478  | 40            | 0.0044       | TRUE         |
| 1     | ELCDNPFFA  | 131   | 139  | 9              | HLA-A*02:01 | 131           | 40             | 0.00435446  | 40            | 0.0044       | TRUE         |
| 1     | PAICHEGKA  | 1061  | 1069 | 9              | HLA-A*02:01 | 1061          | 40             | 0.00433707  | 40            | 0.0043       | TRUE         |
| 1     | AQVKQMYKT  | 765   | 773  | 9              | HLA-A*02:01 | 765           | 40             | 0.0043004   | 40            | 0.0043       | TRUE         |
| 1     | IAIVMVTIL  | 1207  | 1215 | 9              | HLA-A*02:01 | 1207          | 40             | 0.00427986  | 40            | 0.0043       | TRUE         |
| 1     | VGYLKPTTF  | 254   | 262  | 9              | HLA-A*02:01 | 254           | 40             | 0.00427878  | 40            | 0.0043       | TRUE         |
| 1     | SFIEDLLFN  | 798   | 806  | 9              | HLA-A*02:01 | 798           | 40             | 0.00420715  | 40            | 0.0042       | TRUE         |
| 1     | ISITTEVMP  | 702   | 710  | 9              | HLA-A*02:01 | 702           | 41             | 0.00418916  | 41            | 0.0042       | TRUE         |
| 1     | IAGLIAIVM  | 1203  | 1211 | 9              | HLA-A*02:01 | 1203          | 41             | 0.0041874   | 41            | 0.0042       | TRUE         |
| 1     | YISDAFSLD  | 163   | 171  | 9              | HLA-A*02:01 | 163           | 41             | 0.0041684   | 41            | 0.0042       | TRUE         |
| 1     | NTIAIPTNF  | 692   | 700  | 9              | HLA-A*02:01 | 692           | 41             | 0.00414021  | 41            | 0.0041       | TRUE         |
| 1     | TFDDVQAPN  | 21    | 29   | 9              | HLA-A*02:01 | 21            | 41             | 0.00413693  | 41            | 0.0041       | TRUE         |
| 1     | FEIDKGIYQ  | 293   | 301  | 9              | HLA-A*02:01 | 293           | 41             | 0.00411104  | 41            | 0.0041       | TRUE         |
| 1     | FGAISSVLN  | 952   | 960  | 9              | HLA-A*02:01 | 952           | 41             | 0.0041085   | 41            | 0.0041       | TRUE         |
| 1     | TGTGVLTPS  | 533   | 541  | 9              | HLA-A*02:01 | 533           | 41             | 0.00407115  | 41            | 0.0041       | TRUE         |
| 1     | NNVFQTOAG  | 626   | 634  | 9              | HLA-A*02:01 | 626           | 41             | 0.00405755  | 41            | 0.0041       | TRUE         |
| 1     | VFLHVTYVP  | 1043  | 1051 | 9              | HLA-A*02:01 | 1043          | 41             | 0.00402224  | 41            | 0.004        | TRUE         |
| 1     | ELGKYEQYI  | 1184  | 1192 | 9              | HLA-A*02:01 | 1184          | 42             | 0.00389076  | 42            | 0.0039       | TRUE         |
| 1     | NPLAELKCS  | 281   | 289  | 9              | HLA-A*02:01 | 281           | 42             | 0.00388046  | 42            | 0.0039       | TRUE         |
| 1     | ISNVFPSPD  | 455   | 463  | 9              | HLA-A*02:01 | 455           | 42             | 0.00384997  | 42            | 0.0038       | TRUE         |
| 1     | SDLDRCTTF  | 14    | 22   | 9              | HLA-A*02:01 | 14            | 42             | 0.00380245  | 42            | 0.0038       | TRUE         |
| 1     | APGQTGVIA  | 398   | 406  | 9              | HLA-A*02:01 | 398           | 42             | 0.00380105  | 42            | 0.0038       | TRUE         |
| 1     | GNNVFQTOA  | 625   | 633  | 9              | HLA-A*02:01 | 625           | 42             | 0.00379712  | 42            | 0.0038       | TRUE         |
| 1     | YLRHGKLRP  | 442   | 450  | 9              | HLA-A*02:01 | 442           | 42             | 0.00374785  | 42            | 0.0037       | TRUE         |
| 1     | STDLIKNQC  | 516   | 524  | 9              | HLA-A*02:01 | 516           | 42             | 0.00371683  | 42            | 0.0037       | TRUE         |
| 1     | VVPSGDVVR  | 307   | 315  | 9              | HLA-A*02:01 | 307           | 42             | 0.00370095  | 42            | 0.0037       | TRUE         |
| 1     | SCSCCLKGA  | 1221  | 1229 | 9              | HLA-A*02:01 | 1221          | 42             | 0.0036692   | 42            | 0.0037       | TRUE         |
| 1     | FRSDTLTYL  | 47    | 55   | 9              | HLA-A*02:01 | 47            | 42             | 0.00366902  | 42            | 0.0037       | TRUE         |
| 1     | LTPAWRIYS  | 615   | 623  | 9              | HLA-A*02:01 | 615           | 42             | 0.00366723  | 42            | 0.0037       | TRUE         |
| 1     | KFDEDDSEP  | 1237  | 1245 | 9              | HLA-A*02:01 | 1237          | 43             | 0.00364081  | 43            | 0.0036       | TRUE         |
| 1     | TFDDVQAP   | 20    | 28   | 9              | HLA-A*02:01 | 20            | 43             | 0.00362043  | 43            | 0.0036       | TRUE         |
| 1     | SSVLNDILS  | 956   | 964  | 9              | HLA-A*02:01 | 956           | 43             | 0.00359769  | 43            | 0.0036       | TRUE         |
| 1     | SEILDISP   | 568   | 576  | 9              | HLA-A*02:01 | 568           | 43             | 0.00357024  | 43            | 0.0036       | TRUE         |
| 1     | FMKQYGECL  | 815   | 823  | 9              | HLA-A*02:01 | 815           | 43             | 0.00354907  | 43            | 0.0035       | TRUE         |
| 1     | FVFKNKDGF  | 185   | 193  | 9              | HLA-A*02:01 | 185           | 43             | 0.00352969  | 43            | 0.0035       | TRUE         |
| 1     | IAYSNNITIA | 687   | 695  | 9              | HLA-A*02:01 | 687           | 43             | 0.00349582  | 43            | 0.0035       | TRUE         |
| 1     | HADQLTPAW  | 611   | 619  | 9              | HLA-A*02:01 | 611           | 43             | 0.00347613  | 43            | 0.0035       | TRUE         |
| 1     | LTQDLFLPF  | 54    | 62   | 9              | HLA-A*02:01 | 54            | 43             | 0.00344968  | 43            | 0.0034       | TRUE         |
| 1     | NTLVKQLSS  | 942   | 950  | 9              | HLA-A*02:01 | 942           | 43             | 0.00344644  | 43            | 0.0034       | TRUE         |
| 1     | FLPFYSNVT  | 59    | 67   | 9              | HLA-A*02:01 | 59            | 43             | 0.0034415   | 43            | 0.0034       | TRUE         |
| 1     | YDPLQPELD  | 1120  | 1128 | 9              | HLA-A*02:01 | 1120          | 43             | 0.00343325  | 43            | 0.0034       | TRUE         |
| 1     | STECANLLL  | 728   | 736  | 9              | HLA-A*02:01 | 728           | 43             | 0.00343106  | 43            | 0.0034       | TRUE         |
| 1     | NFTTAPAIC  | 1056  | 1064 | 9              | HLA-A*02:01 | 1056          | 43             | 0.00340619  | 43            | 0.0034       | TRUE         |
| 1     | ITTEVMPVS  | 704   | 712  | 9              | HLA-A*02:01 | 704           | 43             | 0.00339802  | 43            | 0.0034       | TRUE         |
| 1     | FLYVYKGYQ  | 193   | 201  | 9              | HLA-A*02:01 | 193           | 44             | 0.00337717  | 44            | 0.0034       | TRUE         |
| 1     | VMVTLILCC  | 1210  | 1218 | 9              | HLA-A*02:01 | 1210          | 44             | 0.00335707  | 44            | 0.0034       | TRUE         |
| 1     | FGRDVSDFT  | 551   | 559  | 9              | HLA-A*02:01 | 551           | 44             | 0.00335574  | 44            | 0.0034       | TRUE         |
| 1     | DGKPCTPPA  | 463   | 471  | 9              | HLA-A*02:01 | 463           | 44             | 0.00335258  | 44            | 0.0034       | TRUE         |
| 1     | VMPVSMMAKT | 708   | 716  | 9              | HLA-A*02:01 | 708           | 44             | 0.00332991  | 44            | 0.0033       | TRUE         |

| seq # | peptide    | start | end  | peptide length | allele      | peptide index | median binding | mhcnp score | mhcnp percent | legacy score | scores equal |
|-------|------------|-------|------|----------------|-------------|---------------|----------------|-------------|---------------|--------------|--------------|
| 1     | HTVSLLRST  | 661   | 669  | 9              | HLA-A*02:01 | 661           | 44             | 0.00332565  | 44            | 0.0033       | TRUE         |
| 1     | LPDDFMGCV  | 412   | 420  | 9              | HLA-A*02:01 | 412           | 44             | 0.00331847  | 44            | 0.0033       | TRUE         |
| 1     | VFNATKFPS  | 328   | 336  | 9              | HLA-A*02:01 | 328           | 44             | 0.00331403  | 44            | 0.0033       | TRUE         |
| 1     | AGICASYHT  | 654   | 662  | 9              | HLA-A*02:01 | 654           | 44             | 0.00330829  | 44            | 0.0033       | TRUE         |
| 1     | TMIFDNAFN  | 150   | 158  | 9              | HLA-A*02:01 | 150           | 44             | 0.0033064   | 44            | 0.0033       | TRUE         |
| 1     | QAGCLIGAE  | 632   | 640  | 9              | HLA-A*02:01 | 632           | 44             | 0.00325578  | 44            | 0.0033       | TRUE         |
| 1     | STGNNVFQT  | 623   | 631  | 9              | HLA-A*02:01 | 623           | 44             | 0.00321788  | 44            | 0.0032       | TRUE         |
| 1     | QSLQTVVTQ  | 984   | 992  | 9              | HLA-A*02:01 | 984           | 44             | 0.00317964  | 44            | 0.0032       | TRUE         |
| 1     | IITTDNTFV  | 1096  | 1104 | 9              | HLA-A*02:01 | 1096          | 44             | 0.00317258  | 44            | 0.0032       | TRUE         |
| 1     | ILLCCMTSC  | 1214  | 1222 | 9              | HLA-A*02:01 | 1214          | 44             | 0.00314588  | 44            | 0.0031       | TRUE         |
| 1     | QLIRAAEIR  | 993   | 1001 | 9              | HLA-A*02:01 | 993           | 44             | 0.00314513  | 44            | 0.0031       | TRUE         |
| 1     | ANLLQLQYS  | 732   | 740  | 9              | HLA-A*02:01 | 732           | 44             | 0.00312891  | 44            | 0.0031       | TRUE         |
| 1     | RASANLAAT  | 1001  | 1009 | 9              | HLA-A*02:01 | 1001          | 45             | 0.00312373  | 45            | 0.0031       | TRUE         |
| 1     | ASSEVAVLY  | 590   | 598  | 9              | HLA-A*02:01 | 590           | 45             | 0.00311722  | 45            | 0.0031       | TRUE         |
| 1     | SANLAATKM  | 1003  | 1011 | 9              | HLA-A*02:01 | 1003          | 45             | 0.00311586  | 45            | 0.0031       | TRUE         |
| 1     | STNVVIRAC  | 120   | 128  | 9              | HLA-A*02:01 | 120           | 45             | 0.00309112  | 45            | 0.0031       | TRUE         |
| 1     | TSYECDIPI  | 644   | 652  | 9              | HLA-A*02:01 | 644           | 45             | 0.0030464   | 45            | 0.003        | TRUE         |
| 1     | SSNFGAISS  | 949   | 957  | 9              | HLA-A*02:01 | 949           | 45             | 0.00303834  | 45            | 0.003        | TRUE         |
| 1     | DVDLGDISG  | 1145  | 1153 | 9              | HLA-A*02:01 | 1145          | 45             | 0.00301977  | 45            | 0.003        | TRUE         |
| 1     | PGTNASSEV  | 586   | 594  | 9              | HLA-A*02:01 | 586           | 45             | 0.00300826  | 45            | 0.003        | TRUE         |
| 1     | TSNFRVVP   | 302   | 310  | 9              | HLA-A*02:01 | 302           | 45             | 0.00297721  | 45            | 0.003        | TRUE         |
| 1     | NKSQSVIII  | 109   | 117  | 9              | HLA-A*02:01 | 109           | 45             | 0.00297165  | 45            | 0.003        | TRUE         |
| 1     | LPDPLKPTK  | 788   | 796  | 9              | HLA-A*02:01 | 788           | 45             | 0.00294875  | 45            | 0.0029       | TRUE         |
| 1     | LSGIAAEQD  | 749   | 757  | 9              | HLA-A*02:01 | 749           | 46             | 0.00283884  | 46            | 0.0028       | TRUE         |
| 1     | DVVNQNAQA  | 932   | 940  | 9              | HLA-A*02:01 | 932           | 46             | 0.00282726  | 46            | 0.0028       | TRUE         |
| 1     | SVIIINNST  | 113   | 121  | 9              | HLA-A*02:01 | 113           | 46             | 0.00282368  | 46            | 0.0028       | TRUE         |
| 1     | VTYVPSQER  | 1047  | 1055 | 9              | HLA-A*02:01 | 1047          | 46             | 0.00281696  | 46            | 0.0028       | TRUE         |
| 1     | QYIKWPWYV  | 1190  | 1198 | 9              | HLA-A*02:01 | 1190          | 46             | 0.00281449  | 46            | 0.0028       | TRUE         |
| 1     | FDNAFNCTF  | 153   | 161  | 9              | HLA-A*02:01 | 153           | 46             | 0.00281441  | 46            | 0.0028       | TRUE         |
| 1     | PFERDISNV  | 450   | 458  | 9              | HLA-A*02:01 | 450           | 46             | 0.00278036  | 46            | 0.0028       | TRUE         |
| 1     | VSTAIHADQ  | 606   | 614  | 9              | HLA-A*02:01 | 606           | 46             | 0.00277875  | 46            | 0.0028       | TRUE         |
| 1     | FNTLKPFIK  | 213   | 221  | 9              | HLA-A*02:01 | 213           | 46             | 0.00276148  | 46            | 0.0028       | TRUE         |
| 1     | INASVVNIQ  | 1154  | 1162 | 9              | HLA-A*02:01 | 1154          | 46             | 0.00274161  | 46            | 0.0027       | TRUE         |
| 1     | GVYYPDEIF  | 39    | 47   | 9              | HLA-A*02:01 | 39            | 46             | 0.00272388  | 46            | 0.0027       | TRUE         |
| 1     | YRYLRHGKL  | 440   | 448  | 9              | HLA-A*02:01 | 440           | 47             | 0.00271683  | 47            | 0.0027       | TRUE         |
| 1     | DLCFSNVYA  | 376   | 384  | 9              | HLA-A*02:01 | 376           | 47             | 0.00271484  | 47            | 0.0027       | TRUE         |
| 1     | NASVVNIQK  | 1155  | 1163 | 9              | HLA-A*02:01 | 1155          | 47             | 0.00268399  | 47            | 0.0027       | TRUE         |
| 1     | NFKHLREFV  | 178   | 186  | 9              | HLA-A*02:01 | 178           | 47             | 0.00267926  | 47            | 0.0027       | TRUE         |
| 1     | VVNIQKEID  | 1158  | 1166 | 9              | HLA-A*02:01 | 1158          | 47             | 0.00267431  | 47            | 0.0027       | TRUE         |
| 1     | QYGSFCTQL  | 737   | 745  | 9              | HLA-A*02:01 | 737           | 47             | 0.00266608  | 47            | 0.0027       | TRUE         |
| 1     | LNDYGFYTT  | 478   | 486  | 9              | HLA-A*02:01 | 478           | 47             | 0.00265684  | 47            | 0.0027       | TRUE         |
| 1     | SSMRGVVYP  | 35    | 43   | 9              | HLA-A*02:01 | 35            | 47             | 0.00264284  | 47            | 0.0026       | TRUE         |
| 1     | KQIANQFNK  | 903   | 911  | 9              | HLA-A*02:01 | 903           | 47             | 0.00262796  | 47            | 0.0026       | TRUE         |
| 1     | NQFNKAISQ  | 907   | 915  | 9              | HLA-A*02:01 | 907           | 47             | 0.0026015   | 47            | 0.0026       | TRUE         |
| 1     | GAGAAALQIP | 871   | 879  | 9              | HLA-A*02:01 | 871           | 47             | 0.00259749  | 47            | 0.0026       | TRUE         |
| 1     | VCGPKLSTD  | 510   | 518  | 9              | HLA-A*02:01 | 510           | 47             | 0.00259727  | 47            | 0.0026       | TRUE         |
| 1     | TSPDVLGDL  | 1142  | 1150 | 9              | HLA-A*02:01 | 1142          | 47             | 0.00255045  | 47            | 0.0026       | TRUE         |
| 1     | LMSFPQAAP  | 1031  | 1039 | 9              | HLA-A*02:01 | 1031          | 47             | 0.00254798  | 47            | 0.0025       | TRUE         |
| 1     | VAYTMSLGA  | 675   | 683  | 9              | HLA-A*02:01 | 675           | 47             | 0.00254336  | 47            | 0.0025       | TRUE         |
| 1     | LKPTRKRFI  | 792   | 800  | 9              | HLA-A*02:01 | 792           | 47             | 0.00254327  | 47            | 0.0025       | TRUE         |
| 1     | GTQTHTMIF  | 145   | 153  | 9              | HLA-A*02:01 | 145           | 47             | 0.00253576  | 47            | 0.0025       | TRUE         |
| 1     | IYQTSNFRV  | 299   | 307  | 9              | HLA-A*02:01 | 299           | 47             | 0.00253427  | 47            | 0.0025       | TRUE         |
| 1     | SQERNFTTA  | 1052  | 1060 | 9              | HLA-A*02:01 | 1052          | 47             | 0.0025341   | 47            | 0.0025       | TRUE         |
| 1     | TQQLIRAAE  | 991   | 999  | 9              | HLA-A*02:01 | 991           | 47             | 0.00251535  | 47            | 0.0025       | TRUE         |
| 1     | NITNLCPFG  | 318   | 326  | 9              | HLA-A*02:01 | 318           | 47             | 0.00250691  | 47            | 0.0025       | TRUE         |
| 1     | VKSFEIDKG  | 290   | 298  | 9              | HLA-A*02:01 | 290           | 47             | 0.00250237  | 47            | 0.0025       | TRUE         |
| 1     | FTDSVRDPK  | 558   | 566  | 9              | HLA-A*02:01 | 558           | 48             | 0.00247882  | 48            | 0.0025       | TRUE         |
| 1     | ECLGDINAR  | 821   | 829  | 9              | HLA-A*02:01 | 821           | 48             | 0.00243967  | 48            | 0.0024       | TRUE         |
| 1     | VFKNDGFL   | 186   | 194  | 9              | HLA-A*02:01 | 186           | 48             | 0.00242341  | 48            | 0.0024       | TRUE         |
| 1     | LKGVLKHYT  | 1247  | 1255 | 9              | HLA-A*02:01 | 1247          | 48             | 0.00241348  | 48            | 0.0024       | TRUE         |
| 1     | SQNPLAELK  | 279   | 287  | 9              | HLA-A*02:01 | 279           | 48             | 0.00241216  | 48            | 0.0024       | TRUE         |
| 1     | LLQYGSFCT  | 735   | 743  | 9              | HLA-A*02:01 | 735           | 48             | 0.00240322  | 48            | 0.0024       | TRUE         |
| 1     | VSGNCDVVI  | 1104  | 1112 | 9              | HLA-A*02:01 | 1104          | 48             | 0.00238741  | 48            | 0.0024       | TRUE         |
| 1     | QSVIIINNS  | 112   | 120  | 9              | HLA-A*02:01 | 112           | 48             | 0.00238331  | 48            | 0.0024       | TRUE         |
| 1     | EIDKGIYQT  | 294   | 302  | 9              | HLA-A*02:01 | 294           | 48             | 0.00235594  | 48            | 0.0024       | TRUE         |
| 1     | NFNGLTGTG  | 528   | 536  | 9              | HLA-A*02:01 | 528           | 48             | 0.00235373  | 48            | 0.0024       | TRUE         |
| 1     | KVTLADAGF  | 807   | 815  | 9              | HLA-A*02:01 | 807           | 48             | 0.00235362  | 48            | 0.0024       | TRUE         |
| 1     | NHTSPDVL   | 1140  | 1148 | 9              | HLA-A*02:01 | 1140          | 48             | 0.00235206  | 48            | 0.0024       | TRUE         |
| 1     | ANLAATKMS  | 1004  | 1012 | 9              | HLA-A*02:01 | 1004          | 48             | 0.00235042  | 48            | 0.0024       | TRUE         |
| 1     | LNRLSGIA   | 745   | 753  | 9              | HLA-A*02:01 | 745           | 48             | 0.00234725  | 48            | 0.0023       | TRUE         |
| 1     | ADQLTPAWR  | 612   | 620  | 9              | HLA-A*02:01 | 612           | 48             | 0.00232581  | 48            | 0.0023       | TRUE         |
| 1     | TLTSGSDLD  | 9     | 17   | 9              | HLA-A*02:01 | 9             | 49             | 0.0023168   | 49            | 0.0023       | TRUE         |
| 1     | TFGNPVIPF  | 75    | 83   | 9              | HLA-A*02:01 | 75            | 49             | 0.0023106   | 49            | 0.0023       | TRUE         |
| 1     | NEVAKNLNE  | 1169  | 1177 | 9              | HLA-A*02:01 | 1169          | 49             | 0.00230898  | 49            | 0.0023       | TRUE         |
| 1     | SPDVLGDI   | 1143  | 1151 | 9              | HLA-A*02:01 | 1143          | 49             | 0.00228589  | 49            | 0.0023       | TRUE         |
| 1     | GVLTSPSKR  | 536   | 544  | 9              | HLA-A*02:01 | 536           | 49             | 0.00225867  | 49            | 0.0023       | TRUE         |
| 1     | FQQFGRDVS  | 548   | 556  | 9              | HLA-A*02:01 | 548           | 49             | 0.00225343  | 49            | 0.0023       | TRUE         |
| 1     | TKMSECVLG  | 1009  | 1017 | 9              | HLA-A*02:01 | 1009          | 49             | 0.00221504  | 49            | 0.0022       | TRUE         |
| 1     | GIYQTSNFR  | 298   | 306  | 9              | HLA-A*02:01 | 298           | 49             | 0.00220197  | 49            | 0.0022       | TRUE         |
| 1     | PFKDGIFYA  | 82    | 90   | 9              | HLA-A*02:01 | 82            | 49             | 0.00219181  | 49            | 0.0022       | TRUE         |

| seq # | peptide    | start | end  | peptide length | allele      | peptide index | median binding | mhcnp score | mhcnp percent | legacy score | scores equal |
|-------|------------|-------|------|----------------|-------------|---------------|----------------|-------------|---------------|--------------|--------------|
| 1     | DVSTAIHAD  | 605   | 613  | 9              | HLA-A*02:01 | 605           | 49             | 0.00218974  | 49            | 0.0022       | TRUE         |
| 1     | KSNVVRGWV  | 94    | 102  | 9              | HLA-A*02:01 | 94            | 49             | 0.00217569  | 49            | 0.0022       | TRUE         |
| 1     | KTSEILDIS  | 566   | 574  | 9              | HLA-A*02:01 | 566           | 50             | 0.00216906  | 50            | 0.0022       | TRUE         |
| 1     | GIYFAATEK  | 86    | 94   | 9              | HLA-A*02:01 | 86            | 50             | 0.00216658  | 50            | 0.0022       | TRUE         |
| 1     | KRVDFCGKG  | 1020  | 1028 | 9              | HLA-A*02:01 | 1020          | 50             | 0.00215578  | 50            | 0.0022       | TRUE         |
| 1     | IRACNFELC  | 125   | 133  | 9              | HLA-A*02:01 | 125           | 50             | 0.00215524  | 50            | 0.0022       | TRUE         |
| 1     | PVSMAKTSV  | 710   | 718  | 9              | HLA-A*02:01 | 710           | 50             | 0.0021398   | 50            | 0.0021       | TRUE         |
| 1     | AICHEGKAY  | 1062  | 1070 | 9              | HLA-A*02:01 | 1062          | 50             | 0.00213682  | 50            | 0.0021       | TRUE         |
| 1     | LTGTGVLTP  | 532   | 540  | 9              | HLA-A*02:01 | 532           | 50             | 0.00212759  | 50            | 0.0021       | TRUE         |
| 1     | VLVNSTFFS  | 354   | 362  | 9              | HLA-A*02:01 | 354           | 50             | 0.00212383  | 50            | 0.0021       | TRUE         |
| 1     | IFDNAFNCT  | 152   | 160  | 9              | HLA-A*02:01 | 152           | 50             | 0.00212205  | 50            | 0.0021       | TRUE         |
| 1     | VLGQSKRVD  | 1015  | 1023 | 9              | HLA-A*02:01 | 1015          | 50             | 0.00212151  | 50            | 0.0021       | TRUE         |
| 1     | VSVITPGTN  | 581   | 589  | 9              | HLA-A*02:01 | 581           | 50             | 0.00211877  | 50            | 0.0021       | TRUE         |
| 1     | IGVTQNVLY  | 891   | 899  | 9              | HLA-A*02:01 | 891           | 50             | 0.00211671  | 50            | 0.0021       | TRUE         |
| 1     | VPSGDVVRF  | 308   | 316  | 9              | HLA-A*02:01 | 308           | 50             | 0.0021144   | 50            | 0.0021       | TRUE         |
| 1     | GFMKQYGEC  | 814   | 822  | 9              | HLA-A*02:01 | 814           | 50             | 0.00211413  | 50            | 0.0021       | TRUE         |
| 1     | CTTFDDVQA  | 19    | 27   | 9              | HLA-A*02:01 | 19            | 50             | 0.0020831   | 50            | 0.0021       | TRUE         |
| 1     | QLTPAWRIY  | 614   | 622  | 9              | HLA-A*02:01 | 614           | 50             | 0.00208267  | 50            | 0.0021       | TRUE         |
| 1     | DISPCSFGG  | 572   | 580  | 9              | HLA-A*02:01 | 572           | 50             | 0.00206966  | 50            | 0.0021       | TRUE         |
| 1     | SPAQDIWGT  | 239   | 247  | 9              | HLA-A*02:01 | 239           | 50             | 0.00206656  | 50            | 0.0021       | TRUE         |
| 1     | WTFGAGAAL  | 868   | 876  | 9              | HLA-A*02:01 | 868           | 50             | 0.00206396  | 50            | 0.0021       | TRUE         |
| 1     | DMIAAYTAA  | 850   | 858  | 9              | HLA-A*02:01 | 850           | 50             | 0.00205749  | 50            | 0.0021       | TRUE         |
| 1     | YSTGNVVFQ  | 622   | 630  | 9              | HLA-A*02:01 | 622           | 50             | 0.00205541  | 50            | 0.0021       | TRUE         |
| 1     | LKYFGGFNF  | 776   | 784  | 9              | HLA-A*02:01 | 776           | 50             | 0.00204146  | 50            | 0.002        | TRUE         |
| 1     | FPREGVVFV  | 1071  | 1079 | 9              | HLA-A*02:01 | 1071          | 50             | 0.00203763  | 50            | 0.002        | TRUE         |
| 1     | SQSVIINN   | 111   | 119  | 9              | HLA-A*02:01 | 111           | 50             | 0.00203512  | 50            | 0.002        | TRUE         |
| 1     | ADYSVLVNS  | 350   | 358  | 9              | HLA-A*02:01 | 350           | 51             | 0.00202202  | 51            | 0.002        | TRUE         |
| 1     | FNFSQILPD  | 782   | 790  | 9              | HLA-A*02:01 | 782           | 51             | 0.00202081  | 51            | 0.002        | TRUE         |
| 1     | RNTRVFAQ   | 758   | 766  | 9              | HLA-A*02:01 | 758           | 51             | 0.00201941  | 51            | 0.002        | TRUE         |
| 1     | GTATAGWTF  | 862   | 870  | 9              | HLA-A*02:01 | 862           | 51             | 0.00199814  | 51            | 0.002        | TRUE         |
| 1     | SQKSIVAYT  | 670   | 678  | 9              | HLA-A*02:01 | 670           | 51             | 0.00198952  | 51            | 0.002        | TRUE         |
| 1     | DISNVPFSP  | 454   | 462  | 9              | HLA-A*02:01 | 454           | 51             | 0.00197085  | 51            | 0.002        | TRUE         |
| 1     | DDSEPVLKG  | 1241  | 1249 | 9              | HLA-A*02:01 | 1241          | 51             | 0.0019706   | 51            | 0.002        | TRUE         |
| 1     | AYRFNGIGV  | 885   | 893  | 9              | HLA-A*02:01 | 885           | 51             | 0.0019646   | 51            | 0.002        | TRUE         |
| 1     | INITNFRAI  | 226   | 234  | 9              | HLA-A*02:01 | 226           | 51             | 0.00196328  | 51            | 0.002        | TRUE         |
| 1     | NHTFGNPVI  | 73    | 81   | 9              | HLA-A*02:01 | 73            | 51             | 0.00192108  | 51            | 0.0019       | TRUE         |
| 1     | TGRLQSLQT  | 980   | 988  | 9              | HLA-A*02:01 | 980           | 51             | 0.00191471  | 51            | 0.0019       | TRUE         |
| 1     | LGFIAGLIA  | 1200  | 1208 | 9              | HLA-A*02:01 | 1200          | 51             | 0.00190389  | 51            | 0.0019       | TRUE         |
| 1     | GFNTLKPIF  | 212   | 220  | 9              | HLA-A*02:01 | 212           | 52             | 0.00188613  | 52            | 0.0019       | TRUE         |
| 1     | AQALNTLVK  | 938   | 946  | 9              | HLA-A*02:01 | 938           | 52             | 0.00188357  | 52            | 0.0019       | TRUE         |
| 1     | YVPSQERNF  | 1049  | 1057 | 9              | HLA-A*02:01 | 1049          | 52             | 0.00187365  | 52            | 0.0019       | TRUE         |
| 1     | AKTSVDCNM  | 714   | 722  | 9              | HLA-A*02:01 | 714           | 52             | 0.00186815  | 52            | 0.0019       | TRUE         |
| 1     | AGFMKQYGE  | 813   | 821  | 9              | HLA-A*02:01 | 813           | 52             | 0.00186425  | 52            | 0.0019       | TRUE         |
| 1     | DVSEKSGNF  | 171   | 179  | 9              | HLA-A*02:01 | 171           | 52             | 0.00185003  | 52            | 0.0019       | TRUE         |
| 1     | VFNGTSWFI  | 1078  | 1086 | 9              | HLA-A*02:01 | 1078          | 52             | 0.00184709  | 52            | 0.0018       | TRUE         |
| 1     | SFPQAAPHG  | 1033  | 1041 | 9              | HLA-A*02:01 | 1033          | 52             | 0.00184172  | 52            | 0.0018       | TRUE         |
| 1     | YFGGFNFSQ  | 778   | 786  | 9              | HLA-A*02:01 | 778           | 52             | 0.00183636  | 52            | 0.0018       | TRUE         |
| 1     | LNDILSRID  | 959   | 967  | 9              | HLA-A*02:01 | 959           | 52             | 0.00182911  | 52            | 0.0018       | TRUE         |
| 1     | STFFSTFKC  | 358   | 366  | 9              | HLA-A*02:01 | 358           | 52             | 0.00181893  | 52            | 0.0018       | TRUE         |
| 1     | AVSKPMGTQ  | 139   | 147  | 9              | HLA-A*02:01 | 139           | 52             | 0.00181387  | 52            | 0.0018       | TRUE         |
| 1     | AAAYTAALVS | 853   | 861  | 9              | HLA-A*02:01 | 853           | 52             | 0.00179644  | 52            | 0.0018       | TRUE         |
| 1     | FELCDNPFF  | 130   | 138  | 9              | HLA-A*02:01 | 130           | 52             | 0.00179629  | 52            | 0.0018       | TRUE         |
| 1     | KVEAEVQID  | 968   | 976  | 9              | HLA-A*02:01 | 968           | 52             | 0.00177678  | 52            | 0.0018       | TRUE         |
| 1     | RFNGIGVTQ  | 887   | 895  | 9              | HLA-A*02:01 | 887           | 52             | 0.0017747   | 52            | 0.0018       | TRUE         |
| 1     | AFSLDVSEK  | 167   | 175  | 9              | HLA-A*02:01 | 167           | 52             | 0.00177148  | 52            | 0.0018       | TRUE         |
| 1     | YKTPTLYKF  | 771   | 779  | 9              | HLA-A*02:01 | 771           | 52             | 0.00176276  | 52            | 0.0018       | TRUE         |
| 1     | TVSLLRSTS  | 662   | 670  | 9              | HLA-A*02:01 | 662           | 52             | 0.00174725  | 52            | 0.0017       | TRUE         |
| 1     | GSDLDRCTT  | 13    | 21   | 9              | HLA-A*02:01 | 13            | 53             | 0.00172176  | 53            | 0.0017       | TRUE         |
| 1     | IPTNFSISI  | 696   | 704  | 9              | HLA-A*02:01 | 696           | 53             | 0.0017191   | 53            | 0.0017       | TRUE         |
| 1     | KQYGECLGD  | 817   | 825  | 9              | HLA-A*02:01 | 817           | 53             | 0.00168792  | 53            | 0.0017       | TRUE         |
| 1     | FAQVKQMYK  | 764   | 772  | 9              | HLA-A*02:01 | 764           | 53             | 0.0016861   | 53            | 0.0017       | TRUE         |
| 1     | RPFERDISN  | 449   | 457  | 9              | HLA-A*02:01 | 449           | 53             | 0.00167662  | 53            | 0.0017       | TRUE         |
| 1     | DEDDSEPV   | 1239  | 1247 | 9              | HLA-A*02:01 | 1239          | 53             | 0.00166706  | 53            | 0.0017       | TRUE         |
| 1     | HTFGNPVIP  | 74    | 82   | 9              | HLA-A*02:01 | 74            | 53             | 0.00166096  | 53            | 0.0017       | TRUE         |
| 1     | ENGITIDAV  | 268   | 276  | 9              | HLA-A*02:01 | 268           | 53             | 0.00164642  | 53            | 0.0016       | TRUE         |
| 1     | TSVDCNMYI  | 716   | 724  | 9              | HLA-A*02:01 | 716           | 54             | 0.00162784  | 54            | 0.0016       | TRUE         |
| 1     | ERNFTTAPA  | 1054  | 1062 | 9              | HLA-A*02:01 | 1054          | 54             | 0.00161634  | 54            | 0.0016       | TRUE         |
| 1     | FGSTMNNKS  | 103   | 111  | 9              | HLA-A*02:01 | 103           | 54             | 0.001608    | 54            | 0.0016       | TRUE         |
| 1     | EPVLKGVKL  | 1244  | 1252 | 9              | HLA-A*02:01 | 1244          | 54             | 0.0015917   | 54            | 0.0016       | TRUE         |
| 1     | DLQELGKYE  | 1181  | 1189 | 9              | HLA-A*02:01 | 1181          | 54             | 0.00158428  | 54            | 0.0016       | TRUE         |
| 1     | FKNKDGLFY  | 187   | 195  | 9              | HLA-A*02:01 | 187           | 54             | 0.00157906  | 54            | 0.0016       | TRUE         |
| 1     | IPFKDGIYF  | 81    | 89   | 9              | HLA-A*02:01 | 81            | 54             | 0.00156862  | 54            | 0.0016       | TRUE         |
| 1     | QHTSSMRGV  | 32    | 40   | 9              | HLA-A*02:01 | 32            | 54             | 0.00156131  | 54            | 0.0016       | TRUE         |
| 1     | YAWERKKIS  | 338   | 346  | 9              | HLA-A*02:01 | 338           | 54             | 0.00154379  | 54            | 0.0015       | TRUE         |
| 1     | ECDIPIGAG  | 647   | 655  | 9              | HLA-A*02:01 | 647           | 54             | 0.00154201  | 54            | 0.0015       | TRUE         |
| 1     | PLLTDDMIA  | 845   | 853  | 9              | HLA-A*02:01 | 845           | 54             | 0.00153764  | 54            | 0.0015       | TRUE         |
| 1     | FQPFQQFGR  | 545   | 553  | 9              | HLA-A*02:01 | 545           | 54             | 0.00153546  | 54            | 0.0015       | TRUE         |
| 1     | SGNCDVVIG  | 1105  | 1113 | 9              | HLA-A*02:01 | 1105          | 54             | 0.00153028  | 54            | 0.0015       | TRUE         |
| 1     | GYLKPTTFM  | 255   | 263  | 9              | HLA-A*02:01 | 255           | 54             | 0.00152726  | 54            | 0.0015       | TRUE         |
| 1     | GQTGVADY   | 400   | 408  | 9              | HLA-A*02:01 | 400           | 54             | 0.00152699  | 54            | 0.0015       | TRUE         |

| seq # | peptide   | start | end  | peptide length | allele      | peptide index | median binding | mhcnp score | mhcnp percent | legacy score | scores equal |
|-------|-----------|-------|------|----------------|-------------|---------------|----------------|-------------|---------------|--------------|--------------|
| 1     | HGVVFLHVT | 1040  | 1048 | 9              | HLA-A*02:01 | 1040          | 54             | 0.00152612  | 54            | 0.0015       | TRUE         |
| 1     | SGSDLDRCT | 12    | 20   | 9              | HLA-A*02:01 | 12            | 55             | 0.00150829  | 55            | 0.0015       | TRUE         |
| 1     | FVFNGTSWF | 1077  | 1085 | 9              | HLA-A*02:01 | 1077          | 55             | 0.0014852   | 55            | 0.0015       | TRUE         |
| 1     | LFNKVTLAD | 804   | 812  | 9              | HLA-A*02:01 | 804           | 55             | 0.00148214  | 55            | 0.0015       | TRUE         |
| 1     | TPAWRIYST | 616   | 624  | 9              | HLA-A*02:01 | 616           | 55             | 0.00147998  | 55            | 0.0015       | TRUE         |
| 1     | AKNLNESLI | 1172  | 1180 | 9              | HLA-A*02:01 | 1172          | 55             | 0.00147753  | 55            | 0.0015       | TRUE         |
| 1     | VYYPDEIFR | 40    | 48   | 9              | HLA-A*02:01 | 40            | 55             | 0.00147256  | 55            | 0.0015       | TRUE         |
| 1     | TSAAAYFVG | 247   | 255  | 9              | HLA-A*02:01 | 247           | 55             | 0.00145875  | 55            | 0.0015       | TRUE         |
| 1     | ATKMSECVL | 1008  | 1016 | 9              | HLA-A*02:01 | 1008          | 55             | 0.0014498   | 55            | 0.0014       | TRUE         |
| 1     | VSKPMGTQT | 140   | 148  | 9              | HLA-A*02:01 | 140           | 55             | 0.00144303  | 55            | 0.0014       | TRUE         |
| 1     | ESLTTTSTA | 918   | 926  | 9              | HLA-A*02:01 | 918           | 55             | 0.00144043  | 55            | 0.0014       | TRUE         |
| 1     | TSQKSIVAY | 669   | 677  | 9              | HLA-A*02:01 | 669           | 55             | 0.00142787  | 55            | 0.0014       | TRUE         |
| 1     | PLGINITNF | 223   | 231  | 9              | HLA-A*02:01 | 223           | 56             | 0.00141636  | 56            | 0.0014       | TRUE         |
| 1     | SAAAYFVG  | 248   | 256  | 9              | HLA-A*02:01 | 248           | 56             | 0.00141536  | 56            | 0.0014       | TRUE         |
| 1     | NVLYENQKQ | 896   | 904  | 9              | HLA-A*02:01 | 896           | 56             | 0.001414    | 56            | 0.0014       | TRUE         |
| 1     | ADSSAIYSN | 683   | 691  | 9              | HLA-A*02:01 | 683           | 56             | 0.00140634  | 56            | 0.0014       | TRUE         |
| 1     | HTMIFDNAF | 149   | 157  | 9              | HLA-A*02:01 | 149           | 56             | 0.00140164  | 56            | 0.0014       | TRUE         |
| 1     | GACSCGSCC | 1228  | 1236 | 9              | HLA-A*02:01 | 1228          | 56             | 0.00139701  | 56            | 0.0014       | TRUE         |
| 1     | EQDRNTREV | 755   | 763  | 9              | HLA-A*02:01 | 755           | 56             | 0.00139287  | 56            | 0.0014       | TRUE         |
| 1     | KRSFIEDLL | 796   | 804  | 9              | HLA-A*02:01 | 796           | 56             | 0.00138595  | 56            | 0.0014       | TRUE         |
| 1     | YTQHTSSMR | 30    | 38   | 9              | HLA-A*02:01 | 30            | 56             | 0.00138174  | 56            | 0.0014       | TRUE         |
| 1     | TTTGIGYOP | 485   | 493  | 9              | HLA-A*02:01 | 485           | 56             | 0.00137888  | 56            | 0.0014       | TRUE         |
| 1     | FSPQIITTD | 1092  | 1100 | 9              | HLA-A*02:01 | 1092          | 56             | 0.00137583  | 56            | 0.0014       | TRUE         |
| 1     | LIKNOQVNF | 519   | 527  | 9              | HLA-A*02:01 | 519           | 56             | 0.00136834  | 56            | 0.0014       | TRUE         |
| 1     | GVVFLHVTY | 1041  | 1049 | 9              | HLA-A*02:01 | 1041          | 56             | 0.00135797  | 56            | 0.0014       | TRUE         |
| 1     | CKFDEDDSE | 1236  | 1244 | 9              | HLA-A*02:01 | 1236          | 56             | 0.00134664  | 56            | 0.0013       | TRUE         |
| 1     | GFHTINHTF | 68    | 76   | 9              | HLA-A*02:01 | 68            | 57             | 0.00132734  | 57            | 0.0013       | TRUE         |
| 1     | CANLLQYVG | 731   | 739  | 9              | HLA-A*02:01 | 731           | 57             | 0.00132647  | 57            | 0.0013       | TRUE         |
| 1     | VDTSEYCDI | 642   | 650  | 9              | HLA-A*02:01 | 642           | 57             | 0.00131768  | 57            | 0.0013       | TRUE         |
| 1     | SPDGKPCTP | 461   | 469  | 9              | HLA-A*02:01 | 461           | 57             | 0.00131089  | 57            | 0.0013       | TRUE         |
| 1     | LTDDMIAAY | 847   | 855  | 9              | HLA-A*02:01 | 847           | 57             | 0.00129931  | 57            | 0.0013       | TRUE         |
| 1     | LDVSEKSGN | 170   | 178  | 9              | HLA-A*02:01 | 170           | 57             | 0.00128269  | 57            | 0.0013       | TRUE         |
| 1     | LGADSSIAV | 681   | 689  | 9              | HLA-A*02:01 | 681           | 57             | 0.00128031  | 57            | 0.0013       | TRUE         |
| 1     | GDDVRQIAP | 391   | 399  | 9              | HLA-A*02:01 | 391           | 57             | 0.0012789   | 57            | 0.0013       | TRUE         |
| 1     | ITDAVDCSQ | 272   | 280  | 9              | HLA-A*02:01 | 272           | 57             | 0.00127762  | 57            | 0.0013       | TRUE         |
| 1     | LDISPCSFG | 571   | 579  | 9              | HLA-A*02:01 | 571           | 57             | 0.00127676  | 57            | 0.0013       | TRUE         |
| 1     | TSTALGKLQ | 923   | 931  | 9              | HLA-A*02:01 | 923           | 57             | 0.0012717   | 57            | 0.0013       | TRUE         |
| 1     | CGPKLSTDL | 511   | 519  | 9              | HLA-A*02:01 | 511           | 57             | 0.00127053  | 57            | 0.0013       | TRUE         |
| 1     | SVDCNMYIC | 717   | 725  | 9              | HLA-A*02:01 | 717           | 57             | 0.00126144  | 57            | 0.0013       | TRUE         |
| 1     | IRASANLAA | 1000  | 1008 | 9              | HLA-A*02:01 | 1000          | 58             | 0.00125312  | 58            | 0.0013       | TRUE         |
| 1     | TINHTFGNP | 71    | 79   | 9              | HLA-A*02:01 | 71            | 58             | 0.00125269  | 58            | 0.0013       | TRUE         |
| 1     | CAQKFNGLT | 833   | 841  | 9              | HLA-A*02:01 | 833           | 58             | 0.00124734  | 58            | 0.0012       | TRUE         |
| 1     | CTDVSTAIH | 603   | 611  | 9              | HLA-A*02:01 | 603           | 58             | 0.00124072  | 58            | 0.0012       | TRUE         |
| 1     | CCSCLKGAC | 1222  | 1230 | 9              | HLA-A*02:01 | 1222          | 58             | 0.00123483  | 58            | 0.0012       | TRUE         |
| 1     | KDGIYFAAT | 84    | 92   | 9              | HLA-A*02:01 | 84            | 58             | 0.00122792  | 58            | 0.0012       | TRUE         |
| 1     | RDLICAQKF | 829   | 837  | 9              | HLA-A*02:01 | 829           | 58             | 0.00121728  | 58            | 0.0012       | TRUE         |
| 1     | GSFCTQLNR | 739   | 747  | 9              | HLA-A*02:01 | 739           | 58             | 0.00121413  | 58            | 0.0012       | TRUE         |
| 1     | YTTTGIGYQ | 484   | 492  | 9              | HLA-A*02:01 | 484           | 58             | 0.00120904  | 58            | 0.0012       | TRUE         |
| 1     | LCFSNVYAD | 377   | 385  | 9              | HLA-A*02:01 | 377           | 58             | 0.00120604  | 58            | 0.0012       | TRUE         |
| 1     | IGAGICASY | 652   | 660  | 9              | HLA-A*02:01 | 652           | 58             | 0.00120039  | 58            | 0.0012       | TRUE         |
| 1     | AEKCSVK   | 284   | 292  | 9              | HLA-A*02:01 | 284           | 58             | 0.00119208  | 58            | 0.0012       | TRUE         |
| 1     | MSFPQAAPH | 1032  | 1040 | 9              | HLA-A*02:01 | 1032          | 59             | 0.00117437  | 59            | 0.0012       | TRUE         |
| 1     | QTQAGCLIG | 630   | 638  | 9              | HLA-A*02:01 | 630           | 59             | 0.00117429  | 59            | 0.0012       | TRUE         |
| 1     | TTEVMPVSM | 705   | 713  | 9              | HLA-A*02:01 | 705           | 59             | 0.0011735   | 59            | 0.0012       | TRUE         |
| 1     | TQHTSSMRG | 31    | 39   | 9              | HLA-A*02:01 | 31            | 59             | 0.00116106  | 5.90E+01      | 1.20E-03     | TRUE         |
| 1     | VSDFTDSVR | 555   | 563  | 9              | HLA-A*02:01 | 555           | 59             | 0.00114973  | 5.90E+01      | 1.10E-03     | TRUE         |
| 1     | ADYNYKLPD | 406   | 414  | 9              | HLA-A*02:01 | 406           | 59             | 0.00114219  | 5.90E+01      | 1.10E-03     | TRUE         |
| 1     | PKTSEILDI | 565   | 573  | 9              | HLA-A*02:01 | 565           | 59             | 0.0011396   | 5.90E+01      | 1.10E-03     | TRUE         |
| 1     | SEVAVLYQD | 592   | 600  | 9              | HLA-A*02:01 | 592           | 59             | 0.00113637  | 5.90E+01      | 1.10E-03     | TRUE         |
| 1     | VQAPNYTQH | 25    | 33   | 9              | HLA-A*02:01 | 25            | 59             | 0.00113559  | 5.90E+01      | 1.10E-03     | TRUE         |
| 1     | KGIYQTSNF | 297   | 305  | 9              | HLA-A*02:01 | 297           | 59             | 0.00112003  | 5.90E+01      | 1.10E-03     | TRUE         |
| 1     | NCVADYSVL | 347   | 355  | 9              | HLA-A*02:01 | 347           | 59             | 0.00111366  | 5.90E+01      | 1.10E-03     | TRUE         |
| 1     | ADSFVVKGD | 384   | 392  | 9              | HLA-A*02:01 | 384           | 59             | 0.00111161  | 5.90E+01      | 1.10E-03     | TRUE         |
| 1     | VVLSFELLN | 497   | 505  | 9              | HLA-A*02:01 | 497           | 59             | 0.00110825  | 5.90E+01      | 1.10E-03     | TRUE         |
| 1     | NESLIDLQE | 1176  | 1184 | 9              | HLA-A*02:01 | 1176          | 59             | 0.00109771  | 5.90E+01      | 1.10E-03     | TRUE         |
| 1     | YRFNGIGVT | 886   | 894  | 9              | HLA-A*02:01 | 886           | 59             | 0.00109517  | 5.90E+01      | 1.10E-03     | TRUE         |
| 1     | LSFELLNAP | 499   | 507  | 9              | HLA-A*02:01 | 499           | 59             | 0.00109408  | 5.90E+01      | 1.10E-03     | TRUE         |
| 1     | CSCLKGACS | 1223  | 1231 | 9              | HLA-A*02:01 | 1223          | 59             | 0.00109173  | 5.90E+01      | 1.10E-03     | TRUE         |
| 1     | GNFKHLREF | 177   | 185  | 9              | HLA-A*02:01 | 177           | 59             | 0.00108749  | 5.90E+01      | 1.10E-03     | TRUE         |
| 1     | LSTDLUKNQ | 515   | 523  | 9              | HLA-A*02:01 | 515           | 60             | 0.00108009  | 6.00E+01      | 1.10E-03     | TRUE         |
| 1     | AYTAALVSG | 854   | 862  | 9              | HLA-A*02:01 | 854           | 60             | 0.00107903  | 6.00E+01      | 1.10E-03     | TRUE         |
| 1     | GYQPIDVVR | 199   | 207  | 9              | HLA-A*02:01 | 199           | 60             | 0.00107256  | 6.00E+01      | 1.10E-03     | TRUE         |
| 1     | FNKAISQIQ | 909   | 917  | 9              | HLA-A*02:01 | 909           | 60             | 0.00106924  | 6.00E+01      | 1.10E-03     | TRUE         |
| 1     | TMSLGADSS | 678   | 686  | 9              | HLA-A*02:01 | 678           | 60             | 0.00106006  | 6.00E+01      | 1.10E-03     | TRUE         |
| 1     | EHVDTSYEC | 640   | 648  | 9              | HLA-A*02:01 | 640           | 60             | 0.00102688  | 6.00E+01      | 1.00E-03     | TRUE         |
| 1     | QKSIVAYTM | 671   | 679  | 9              | HLA-A*02:01 | 671           | 60             | 0.00102534  | 6.00E+01      | 1.00E-03     | TRUE         |
| 1     | VNIQKEIDR | 1159  | 1167 | 9              | HLA-A*02:01 | 1159          | 60             | 0.00102199  | 6.00E+01      | 1.00E-03     | TRUE         |
| 1     | TQDLFLPFY | 55    | 63   | 9              | HLA-A*02:01 | 55            | 60             | 0.00102057  | 6.00E+01      | 1.00E-03     | TRUE         |
| 1     | GKLRPFERD | 446   | 454  | 9              | HLA-A*02:01 | 446           | 60             | 0.00101989  | 6.00E+01      | 1.00E-03     | TRUE         |
| 1     | GIINNTVYD | 1113  | 1121 | 9              | HLA-A*02:01 | 1113          | 60             | 0.00101593  | 6.00E+01      | 1.00E-03     | TRUE         |

| seq # | peptide    | start | end  | peptide length | allele      | peptide index | median binding | mhcnp score | mhcnp percent | legacy score | scores equal |
|-------|------------|-------|------|----------------|-------------|---------------|----------------|-------------|---------------|--------------|--------------|
| 1     | VVRFPNITN  | 313   | 321  | 9              | HLA-A*02:01 | 313           | 60             | 0.00100851  | 6.00E+01      | 1.00E-03     | TRUE         |
| 1     | IINNTVYDP  | 1114  | 1122 | 9              | HLA-A*02:01 | 1114          | 60             | 0.00100015  | 6.00E+01      | 1.00E-03     | TRUE         |
| 1     | AYSNNTIAI  | 688   | 696  | 9              | HLA-A*02:01 | 688           | 60             | 0.00099739  | 6.00E+01      | 1.00E-03     | TRUE         |
| 1     | AWNTRNIDA  | 422   | 430  | 9              | HLA-A*02:01 | 422           | 60             | 0.00099688  | 6.00E+01      | 1.00E-03     | TRUE         |
| 1     | KNLNESLID  | 1173  | 1181 | 9              | HLA-A*02:01 | 1173          | 61             | 0.0009953   | 6.10E+01      | 1.00E-03     | TRUE         |
| 1     | SVLYNSTFF  | 353   | 361  | 9              | HLA-A*02:01 | 353           | 61             | 0.00099099  | 6.10E+01      | 1.00E-03     | TRUE         |
| 1     | LAELKCSVK  | 283   | 291  | 9              | HLA-A*02:01 | 283           | 61             | 0.00098156  | 6.10E+01      | 1.00E-03     | TRUE         |
| 1     | IINNTVYDPL | 1115  | 1123 | 9              | HLA-A*02:01 | 1115          | 61             | 0.00097974  | 6.10E+01      | 1.00E-03     | TRUE         |
| 1     | CGDSTECAN  | 725   | 733  | 9              | HLA-A*02:01 | 725           | 61             | 0.00097708  | 6.10E+01      | 1.00E-03     | TRUE         |
| 1     | TKRSFIEDL  | 795   | 803  | 9              | HLA-A*02:01 | 795           | 61             | 0.0009726   | 6.10E+01      | 1.00E-03     | TRUE         |
| 1     | KRFQPFQQF  | 543   | 551  | 9              | HLA-A*02:01 | 543           | 61             | 0.00096778  | 6.10E+01      | 1.00E-03     | TRUE         |
| 1     | HGKLRFPER  | 445   | 453  | 9              | HLA-A*02:01 | 445           | 61             | 0.00095279  | 6.10E+01      | 1.00E-03     | TRUE         |
| 1     | LGKLQDVVN  | 927   | 935  | 9              | HLA-A*02:01 | 927           | 61             | 0.00094554  | 6.10E+01      | 9.00E-04     | TRUE         |
| 1     | VRDLPSGFN  | 206   | 214  | 9              | HLA-A*02:01 | 206           | 61             | 0.00094057  | 6.10E+01      | 9.00E-04     | TRUE         |
| 1     | QDLFLPFYS  | 56    | 64   | 9              | HLA-A*02:01 | 56            | 61             | 0.00093861  | 6.10E+01      | 9.00E-04     | TRUE         |
| 1     | NNKSQSVII  | 108   | 116  | 9              | HLA-A*02:01 | 108           | 61             | 0.00092771  | 6.10E+01      | 9.00E-04     | TRUE         |
| 1     | DAFSLDVSE  | 166   | 174  | 9              | HLA-A*02:01 | 166           | 62             | 0.00092512  | 6.20E+01      | 9.00E-04     | TRUE         |
| 1     | FGEVFNATK  | 325   | 333  | 9              | HLA-A*02:01 | 325           | 62             | 0.00092397  | 6.20E+01      | 9.00E-04     | TRUE         |
| 1     | APATVCGPK  | 506   | 514  | 9              | HLA-A*02:01 | 506           | 62             | 0.00092128  | 6.20E+01      | 9.00E-04     | TRUE         |
| 1     | LQELGKYEQ  | 1182  | 1190 | 9              | HLA-A*02:01 | 1182          | 62             | 0.00091617  | 6.20E+01      | 9.00E-04     | TRUE         |
| 1     | FKEELDKYF  | 1130  | 1138 | 9              | HLA-A*02:01 | 1130          | 62             | 0.00091205  | 6.20E+01      | 9.00E-04     | TRUE         |
| 1     | KHLREFVFK  | 180   | 188  | 9              | HLA-A*02:01 | 180           | 62             | 0.000912    | 6.20E+01      | 9.00E-04     | TRUE         |
| 1     | SNNTIAIPT  | 690   | 698  | 9              | HLA-A*02:01 | 690           | 62             | 0.00090908  | 6.20E+01      | 9.00E-04     | TRUE         |
| 1     | FKCYGVSAT  | 364   | 372  | 9              | HLA-A*02:01 | 364           | 62             | 0.00090486  | 6.20E+01      | 9.00E-04     | TRUE         |
| 1     | GKGVHLMFS  | 1026  | 1034 | 9              | HLA-A*02:01 | 1026          | 62             | 0.00089785  | 6.20E+01      | 9.00E-04     | TRUE         |
| 1     | EVAVLYQDV  | 593   | 601  | 9              | HLA-A*02:01 | 593           | 62             | 0.0008859   | 6.20E+01      | 9.00E-04     | TRUE         |
| 1     | DSTECANLL  | 727   | 735  | 9              | HLA-A*02:01 | 727           | 62             | 0.00088521  | 6.20E+01      | 9.00E-04     | TRUE         |
| 1     | LNESLIDLQ  | 1175  | 1183 | 9              | HLA-A*02:01 | 1175          | 62             | 0.00088434  | 6.20E+01      | 9.00E-04     | TRUE         |
| 1     | VTGFHTINH  | 66    | 74   | 9              | HLA-A*02:01 | 66            | 62             | 0.00088191  | 6.20E+01      | 9.00E-04     | TRUE         |
| 1     | MNNKSQSVI  | 107   | 115  | 9              | HLA-A*02:01 | 107           | 62             | 0.00087091  | 6.20E+01      | 9.00E-04     | TRUE         |
| 1     | NNTIAIPTN  | 691   | 699  | 9              | HLA-A*02:01 | 691           | 62             | 0.00086937  | 6.20E+01      | 9.00E-04     | TRUE         |
| 1     | MLKYDENG   | 263   | 271  | 9              | HLA-A*02:01 | 263           | 62             | 0.00086821  | 6.20E+01      | 9.00E-04     | TRUE         |
| 1     | KNHTSPDVD  | 1139  | 1147 | 9              | HLA-A*02:01 | 1139          | 62             | 0.0008673   | 6.20E+01      | 9.00E-04     | TRUE         |
| 1     | GNPVIPIFD  | 77    | 85   | 9              | HLA-A*02:01 | 77            | 62             | 0.00086478  | 6.20E+01      | 9.00E-04     | TRUE         |
| 1     | RFQPFQFG   | 544   | 552  | 9              | HLA-A*02:01 | 544           | 63             | 0.00086282  | 6.30E+01      | 9.00E-04     | TRUE         |
| 1     | QIITDNTF   | 1095  | 1103 | 9              | HLA-A*02:01 | 1095          | 63             | 0.00085788  | 6.30E+01      | 9.00E-04     | TRUE         |
| 1     | FRAILTAFS  | 231   | 239  | 9              | HLA-A*02:01 | 231           | 63             | 0.00085626  | 6.30E+01      | 9.00E-04     | TRUE         |
| 1     | IFLLFLTLL  | 3     | 11   | 9              | HLA-A*02:01 | 3             | 63             | 0.0008561   | 6.30E+01      | 9.00E-04     | TRUE         |
| 1     | TTDNTFVSG  | 1098  | 1106 | 9              | HLA-A*02:01 | 1098          | 63             | 0.00085339  | 6.30E+01      | 9.00E-04     | TRUE         |
| 1     | YTMSLGADS  | 677   | 685  | 9              | HLA-A*02:01 | 677           | 63             | 0.00085136  | 6.30E+01      | 9.00E-04     | TRUE         |
| 1     | KISNCVADY  | 344   | 352  | 9              | HLA-A*02:01 | 344           | 63             | 0.00084427  | 6.30E+01      | 8.00E-04     | TRUE         |
| 1     | TFVSGNCDV  | 1102  | 1110 | 9              | HLA-A*02:01 | 1102          | 63             | 0.00083941  | 6.30E+01      | 8.00E-04     | TRUE         |
| 1     | PSQERNFTT  | 1051  | 1059 | 9              | HLA-A*02:01 | 1051          | 63             | 0.00083025  | 6.30E+01      | 8.00E-04     | TRUE         |
| 1     | TSSMRGVVY  | 34    | 42   | 9              | HLA-A*02:01 | 34            | 63             | 0.00082802  | 6.30E+01      | 8.00E-04     | TRUE         |
| 1     | TAGWTFGAG  | 865   | 873  | 9              | HLA-A*02:01 | 865           | 63             | 0.00082737  | 6.30E+01      | 8.00E-04     | TRUE         |
| 1     | KPTPLKYFG  | 772   | 780  | 9              | HLA-A*02:01 | 772           | 63             | 0.00082145  | 6.30E+01      | 8.00E-04     | TRUE         |
| 1     | SGIAAEQDR  | 750   | 758  | 9              | HLA-A*02:01 | 750           | 63             | 0.000812    | 6.30E+01      | 8.00E-04     | TRUE         |
| 1     | FERDISNVP  | 451   | 459  | 9              | HLA-A*02:01 | 451           | 63             | 0.00081197  | 6.30E+01      | 8.00E-04     | TRUE         |
| 1     | EVAKNLNES  | 1170  | 1178 | 9              | HLA-A*02:01 | 1170          | 63             | 0.00081181  | 6.30E+01      | 8.00E-04     | TRUE         |
| 1     | VSGTATAGW  | 860   | 868  | 9              | HLA-A*02:01 | 860           | 63             | 0.00081167  | 6.30E+01      | 8.00E-04     | TRUE         |
| 1     | MAYRFNGIG  | 884   | 892  | 9              | HLA-A*02:01 | 884           | 64             | 0.00080622  | 6.40E+01      | 8.00E-04     | TRUE         |
| 1     | IDATSTGNY  | 428   | 436  | 9              | HLA-A*02:01 | 428           | 64             | 0.00079614  | 6.40E+01      | 8.00E-04     | TRUE         |
| 1     | RAILTAISP  | 232   | 240  | 9              | HLA-A*02:01 | 232           | 64             | 0.0007948   | 6.40E+01      | 8.00E-04     | TRUE         |
| 1     | NMYICGDST  | 721   | 729  | 9              | HLA-A*02:01 | 721           | 64             | 0.00079474  | 6.40E+01      | 8.00E-04     | TRUE         |
| 1     | FMGCVLAWN  | 416   | 424  | 9              | HLA-A*02:01 | 416           | 64             | 0.00079153  | 6.40E+01      | 8.00E-04     | TRUE         |
| 1     | NKVTLADAG  | 806   | 814  | 9              | HLA-A*02:01 | 806           | 64             | 0.00078716  | 6.40E+01      | 8.00E-04     | TRUE         |
| 1     | ASANLAATK  | 1002  | 1010 | 9              | HLA-A*02:01 | 1002          | 64             | 0.00078503  | 6.40E+01      | 8.00E-04     | TRUE         |
| 1     | LGQSKRVDF  | 1016  | 1024 | 9              | HLA-A*02:01 | 1016          | 64             | 0.00078194  | 6.40E+01      | 8.00E-04     | TRUE         |
| 1     | NTVYDPLQP  | 1117  | 1125 | 9              | HLA-A*02:01 | 1117          | 64             | 0.00078166  | 6.40E+01      | 8.00E-04     | TRUE         |
| 1     | VVGKDDVRQ  | 388   | 396  | 9              | HLA-A*02:01 | 388           | 64             | 0.00078075  | 6.40E+01      | 8.00E-04     | TRUE         |
| 1     | IADYNYKLP  | 405   | 413  | 9              | HLA-A*02:01 | 405           | 64             | 0.00077841  | 6.40E+01      | 8.00E-04     | TRUE         |
| 1     | NFFSPQIIT  | 1090  | 1098 | 9              | HLA-A*02:01 | 1090          | 64             | 0.00077466  | 6.40E+01      | 8.00E-04     | TRUE         |
| 1     | LLCCMTSCC  | 1215  | 1223 | 9              | HLA-A*02:01 | 1215          | 64             | 0.00077174  | 6.40E+01      | 8.00E-04     | TRUE         |
| 1     | SGNFKHLRE  | 176   | 184  | 9              | HLA-A*02:01 | 176           | 64             | 0.00076981  | 6.40E+01      | 8.00E-04     | TRUE         |
| 1     | SGINASVVN  | 1152  | 1160 | 9              | HLA-A*02:01 | 1152          | 64             | 0.00076907  | 6.40E+01      | 8.00E-04     | TRUE         |
| 1     | KPCTPPALN  | 465   | 473  | 9              | HLA-A*02:01 | 465           | 64             | 0.00076565  | 6.40E+01      | 8.00E-04     | TRUE         |
| 1     | VVRGWVFGS  | 97    | 105  | 9              | HLA-A*02:01 | 97            | 64             | 0.00075757  | 6.40E+01      | 8.00E-04     | TRUE         |
| 1     | NARDLICAQ  | 827   | 835  | 9              | HLA-A*02:01 | 827           | 64             | 0.00075739  | 6.40E+01      | 8.00E-04     | TRUE         |
| 1     | KSQSVIIIN  | 110   | 118  | 9              | HLA-A*02:01 | 110           | 64             | 0.00074867  | 6.40E+01      | 7.00E-04     | TRUE         |
| 1     | HTINHTFGN  | 70    | 78   | 9              | HLA-A*02:01 | 70            | 65             | 0.00074568  | 6.50E+01      | 7.00E-04     | TRUE         |
| 1     | ADAGFMKQY  | 811   | 819  | 9              | HLA-A*02:01 | 811           | 65             | 0.000731    | 6.50E+01      | 7.00E-04     | TRUE         |
| 1     | PFGEVFNAT  | 324   | 332  | 9              | HLA-A*02:01 | 324           | 65             | 0.00073021  | 6.50E+01      | 7.00E-04     | TRUE         |
| 1     | LRSTSQKSI  | 666   | 674  | 9              | HLA-A*02:01 | 666           | 65             | 0.00072647  | 6.50E+01      | 7.00E-04     | TRUE         |
| 1     | TTTSTALGK  | 921   | 929  | 9              | HLA-A*02:01 | 921           | 65             | 0.00071759  | 6.50E+01      | 7.00E-04     | TRUE         |
| 1     | AAEIRASAN  | 997   | 1005 | 9              | HLA-A*02:01 | 997           | 65             | 0.00071746  | 6.50E+01      | 7.00E-04     | TRUE         |
| 1     | PFSPDGKPC  | 459   | 467  | 9              | HLA-A*02:01 | 459           | 65             | 0.0007102   | 6.50E+01      | 7.00E-04     | TRUE         |
| 1     | DDVRQIAPG  | 392   | 400  | 9              | HLA-A*02:01 | 392           | 65             | 0.00070958  | 6.50E+01      | 7.00E-04     | TRUE         |
| 1     | GRDVSDFTD  | 552   | 560  | 9              | HLA-A*02:01 | 552           | 65             | 0.00070524  | 6.50E+01      | 7.00E-04     | TRUE         |
| 1     | SGTATAGWT  | 861   | 869  | 9              | HLA-A*02:01 | 861           | 65             | 0.00070038  | 6.50E+01      | 7.00E-04     | TRUE         |
| 1     | QCVNFNFNG  | 523   | 531  | 9              | HLA-A*02:01 | 523           | 65             | 0.00069986  | 6.50E+01      | 7.00E-04     | TRUE         |

| seq # | peptide    | start | end  | peptide length | allele      | peptide index | median binding | mhcnp score | mhcnp percent | legacy score | scores equal |
|-------|------------|-------|------|----------------|-------------|---------------|----------------|-------------|---------------|--------------|--------------|
| 1     | LHVTYVPSQ  | 1045  | 1053 | 9              | HLA-A*02:01 | 1045          | 66             | 0.00069503  | 6.60E+01      | 7.00E-04     | TRUE         |
| 1     | RACNFELCD  | 126   | 134  | 9              | HLA-A*02:01 | 126           | 66             | 0.00068923  | 6.60E+01      | 7.00E-04     | TRUE         |
| 1     | AFSPAQDIW  | 237   | 245  | 9              | HLA-A*02:01 | 237           | 66             | 0.00068865  | 6.60E+01      | 7.00E-04     | TRUE         |
| 1     | IQKEIDRLN  | 1161  | 1169 | 9              | HLA-A*02:01 | 1161          | 66             | 0.00068424  | 6.60E+01      | 7.00E-04     | TRUE         |
| 1     | NDYGFYTTT  | 479   | 487  | 9              | HLA-A*02:01 | 479           | 66             | 0.00068312  | 6.60E+01      | 7.00E-04     | TRUE         |
| 1     | YFAATEKSN  | 88    | 96   | 9              | HLA-A*02:01 | 88            | 66             | 0.00068054  | 6.60E+01      | 7.00E-04     | TRUE         |
| 1     | CDNPFPAVS  | 133   | 141  | 9              | HLA-A*02:01 | 133           | 66             | 0.00067811  | 6.60E+01      | 7.00E-04     | TRUE         |
| 1     | CTPPALNCY  | 467   | 475  | 9              | HLA-A*02:01 | 467           | 66             | 0.00067351  | 6.60E+01      | 7.00E-04     | TRUE         |
| 1     | ARDLICAQK  | 828   | 836  | 9              | HLA-A*02:01 | 828           | 66             | 0.0006695   | 6.60E+01      | 7.00E-04     | TRUE         |
| 1     | AYFPREGVF  | 1069  | 1077 | 9              | HLA-A*02:01 | 1069          | 66             | 0.00066215  | 6.60E+01      | 7.00E-04     | TRUE         |
| 1     | RDVSDFTDS  | 553   | 561  | 9              | HLA-A*02:01 | 553           | 66             | 0.0006574   | 6.60E+01      | 7.00E-04     | TRUE         |
| 1     | EAEVQIDRL  | 970   | 978  | 9              | HLA-A*02:01 | 970           | 66             | 0.00065692  | 6.60E+01      | 7.00E-04     | TRUE         |
| 1     | WFITQRNFF  | 1084  | 1092 | 9              | HLA-A*02:01 | 1084          | 66             | 0.00065579  | 6.60E+01      | 7.00E-04     | TRUE         |
| 1     | ITGRQLSLQ  | 979   | 987  | 9              | HLA-A*02:01 | 979           | 66             | 0.00065426  | 6.60E+01      | 7.00E-04     | TRUE         |
| 1     | YSNNTIAP   | 689   | 697  | 9              | HLA-A*02:01 | 689           | 67             | 0.00065283  | 6.70E+01      | 7.00E-04     | TRUE         |
| 1     | TATAGWTFG  | 863   | 871  | 9              | HLA-A*02:01 | 863           | 67             | 0.00064646  | 6.70E+01      | 6.00E-04     | TRUE         |
| 1     | SDAFSLDVS  | 165   | 173  | 9              | HLA-A*02:01 | 165           | 67             | 0.00064551  | 6.70E+01      | 6.00E-04     | TRUE         |
| 1     | LFLTLTSGS  | 6     | 14   | 9              | HLA-A*02:01 | 6             | 67             | 0.00064521  | 6.70E+01      | 6.00E-04     | TRUE         |
| 1     | EVMPVSMK   | 707   | 715  | 9              | HLA-A*02:01 | 707           | 67             | 0.00064471  | 6.70E+01      | 6.00E-04     | TRUE         |
| 1     | DIPIGAGIC  | 649   | 657  | 9              | HLA-A*02:01 | 649           | 67             | 0.00064039  | 6.70E+01      | 6.00E-04     | TRUE         |
| 1     | FPNITNLCP  | 316   | 324  | 9              | HLA-A*02:01 | 316           | 67             | 0.00063231  | 6.70E+01      | 6.00E-04     | TRUE         |
| 1     | NVPFSPDGK  | 457   | 465  | 9              | HLA-A*02:01 | 457           | 67             | 0.00063207  | 6.70E+01      | 6.00E-04     | TRUE         |
| 1     | YPDEIFRSD  | 42    | 50   | 9              | HLA-A*02:01 | 42            | 67             | 0.00062516  | 6.70E+01      | 6.00E-04     | TRUE         |
| 1     | LPLGINITN  | 222   | 230  | 9              | HLA-A*02:01 | 222           | 67             | 0.00062496  | 6.70E+01      | 6.00E-04     | TRUE         |
| 1     | APNYTQHTS  | 27    | 35   | 9              | HLA-A*02:01 | 27            | 67             | 0.00062057  | 6.70E+01      | 6.00E-04     | TRUE         |
| 1     | TQTHTMIFD  | 146   | 154  | 9              | HLA-A*02:01 | 146           | 67             | 0.00061984  | 6.70E+01      | 6.00E-04     | TRUE         |
| 1     | GTSWFITQR  | 1081  | 1089 | 9              | HLA-A*02:01 | 1081          | 67             | 0.0006164   | 6.70E+01      | 6.00E-04     | TRUE         |
| 1     | HVDTSYECD  | 641   | 649  | 9              | HLA-A*02:01 | 641           | 67             | 0.0006137   | 6.70E+01      | 6.00E-04     | TRUE         |
| 1     | KSGNFKHLR  | 175   | 183  | 9              | HLA-A*02:01 | 175           | 67             | 0.00060944  | 6.70E+01      | 6.00E-04     | TRUE         |
| 1     | AFNCTFEYI  | 156   | 164  | 9              | HLA-A*02:01 | 156           | 68             | 0.00060526  | 6.80E+01      | 6.00E-04     | TRUE         |
| 1     | DDMIAAYTA  | 849   | 857  | 9              | HLA-A*02:01 | 849           | 68             | 0.00059503  | 6.80E+01      | 6.00E-04     | TRUE         |
| 1     | LQPELDSFK  | 1123  | 1131 | 9              | HLA-A*02:01 | 1123          | 68             | 0.00059188  | 6.80E+01      | 6.00E-04     | TRUE         |
| 1     | IDLQELGKY  | 1180  | 1188 | 9              | HLA-A*02:01 | 1180          | 68             | 0.00059093  | 6.80E+01      | 6.00E-04     | TRUE         |
| 1     | IYFAATEKS  | 87    | 95   | 9              | HLA-A*02:01 | 87            | 68             | 0.0005857   | 6.80E+01      | 6.00E-04     | TRUE         |
| 1     | SSEVAVLVQ  | 591   | 599  | 9              | HLA-A*02:01 | 591           | 68             | 0.00058563  | 6.80E+01      | 6.00E-04     | TRUE         |
| 1     | TNFSISITT  | 698   | 706  | 9              | HLA-A*02:01 | 698           | 68             | 0.00058141  | 6.80E+01      | 6.00E-04     | TRUE         |
| 1     | RGWVFGSTM  | 99    | 107  | 9              | HLA-A*02:01 | 99            | 68             | 0.00058121  | 6.80E+01      | 6.00E-04     | TRUE         |
| 1     | GKAYFPREG  | 1067  | 1075 | 9              | HLA-A*02:01 | 1067          | 68             | 0.00058055  | 6.80E+01      | 6.00E-04     | TRUE         |
| 1     | PGQTGVADI  | 399   | 407  | 9              | HLA-A*02:01 | 399           | 68             | 0.00058047  | 6.80E+01      | 6.00E-04     | TRUE         |
| 1     | VIINNSTN   | 114   | 122  | 9              | HLA-A*02:01 | 114           | 68             | 0.00058006  | 6.80E+01      | 6.00E-04     | TRUE         |
| 1     | ANQFNKAIS  | 906   | 914  | 9              | HLA-A*02:01 | 906           | 68             | 0.00057805  | 6.80E+01      | 6.00E-04     | TRUE         |
| 1     | LDKVEAEVQ  | 966   | 974  | 9              | HLA-A*02:01 | 966           | 68             | 0.00057626  | 6.80E+01      | 6.00E-04     | TRUE         |
| 1     | GKYEQYIKW  | 1186  | 1194 | 9              | HLA-A*02:01 | 1186          | 68             | 0.00057519  | 6.80E+01      | 6.00E-04     | TRUE         |
| 1     | FFSTFKCYG  | 360   | 368  | 9              | HLA-A*02:01 | 360           | 68             | 0.0005712   | 6.80E+01      | 6.00E-04     | TRUE         |
| 1     | NATKFPSPVY | 330   | 338  | 9              | HLA-A*02:01 | 330           | 68             | 0.00056904  | 6.80E+01      | 6.00E-04     | TRUE         |
| 1     | LNTLVKQLS  | 941   | 949  | 9              | HLA-A*02:01 | 941           | 68             | 0.00056394  | 6.80E+01      | 6.00E-04     | TRUE         |
| 1     | TEVMPVSMK  | 706   | 714  | 9              | HLA-A*02:01 | 706           | 69             | 0.00055597  | 6.90E+01      | 6.00E-04     | TRUE         |
| 1     | DEIFRSDTL  | 44    | 52   | 9              | HLA-A*02:01 | 44            | 69             | 0.00055443  | 6.90E+01      | 6.00E-04     | TRUE         |
| 1     | ITTDNTFVS  | 1097  | 1105 | 9              | HLA-A*02:01 | 1097          | 69             | 0.00055276  | 6.90E+01      | 6.00E-04     | TRUE         |
| 1     | KCYGVSAVK  | 365   | 373  | 9              | HLA-A*02:01 | 365           | 69             | 0.00054955  | 6.90E+01      | 5.00E-04     | TRUE         |
| 1     | GSCCKFDED  | 1233  | 1241 | 9              | HLA-A*02:01 | 1233          | 69             | 0.00054899  | 6.90E+01      | 5.00E-04     | TRUE         |
| 1     | GVFVFNGTS  | 1075  | 1083 | 9              | HLA-A*02:01 | 1075          | 69             | 0.00054607  | 6.90E+01      | 5.00E-04     | TRUE         |
| 1     | YNYKLDPDF  | 408   | 416  | 9              | HLA-A*02:01 | 408           | 69             | 0.00054148  | 6.90E+01      | 5.00E-04     | TRUE         |
| 1     | APHGVVFLH  | 1038  | 1046 | 9              | HLA-A*02:01 | 1038          | 69             | 0.00053973  | 6.90E+01      | 5.00E-04     | TRUE         |
| 1     | NKDGFLYVY  | 189   | 197  | 9              | HLA-A*02:01 | 189           | 69             | 0.00053744  | 6.90E+01      | 5.00E-04     | TRUE         |
| 1     | NCDVVIGII  | 1107  | 1115 | 9              | HLA-A*02:01 | 1107          | 69             | 0.00053726  | 6.90E+01      | 5.00E-04     | TRUE         |
| 1     | KKISNCVAD  | 343   | 351  | 9              | HLA-A*02:01 | 343           | 69             | 0.00053707  | 6.90E+01      | 5.00E-04     | TRUE         |
| 1     | CLKGACSCG  | 1225  | 1233 | 9              | HLA-A*02:01 | 1225          | 69             | 0.00053047  | 6.90E+01      | 5.00E-04     | TRUE         |
| 1     | NYTQHTSSM  | 29    | 37   | 9              | HLA-A*02:01 | 29            | 69             | 0.00052869  | 6.90E+01      | 5.00E-04     | TRUE         |
| 1     | DTLYLTQDL  | 50    | 58   | 9              | HLA-A*02:01 | 50            | 69             | 0.00052706  | 6.90E+01      | 5.00E-04     | TRUE         |
| 1     | LDSFKEELD  | 1127  | 1135 | 9              | HLA-A*02:01 | 1127          | 69             | 0.00052563  | 6.90E+01      | 5.00E-04     | TRUE         |
| 1     | EYISDAFSL  | 162   | 170  | 9              | HLA-A*02:01 | 162           | 69             | 0.00052051  | 6.90E+01      | 5.00E-04     | TRUE         |
| 1     | CTFEYISDA  | 159   | 167  | 9              | HLA-A*02:01 | 159           | 69             | 0.00052044  | 6.90E+01      | 5.00E-04     | TRUE         |
| 1     | NFSISITTE  | 699   | 707  | 9              | HLA-A*02:01 | 699           | 69             | 0.00051987  | 6.90E+01      | 5.00E-04     | TRUE         |
| 1     | AGCLIGAHE  | 633   | 641  | 9              | HLA-A*02:01 | 633           | 69             | 0.00051745  | 6.90E+01      | 5.00E-04     | TRUE         |
| 1     | VIPFKDGIY  | 80    | 88   | 9              | HLA-A*02:01 | 80            | 69             | 0.00051719  | 6.90E+01      | 5.00E-04     | TRUE         |
| 1     | QYGECLGDI  | 818   | 826  | 9              | HLA-A*02:01 | 818           | 69             | 0.00051691  | 6.90E+01      | 5.00E-04     | TRUE         |
| 1     | AEVQIDRLI  | 971   | 979  | 9              | HLA-A*02:01 | 971           | 70             | 0.00051171  | 7.00E+01      | 5.00E-04     | TRUE         |
| 1     | TFKCYGVSA  | 363   | 371  | 9              | HLA-A*02:01 | 363           | 70             | 0.00051004  | 7.00E+01      | 5.00E-04     | TRUE         |
| 1     | GFYTTTGIG  | 482   | 490  | 9              | HLA-A*02:01 | 482           | 70             | 0.00050835  | 7.00E+01      | 5.00E-04     | TRUE         |
| 1     | SNVVRGVWF  | 95    | 103  | 9              | HLA-A*02:01 | 95            | 70             | 0.00050776  | 7.00E+01      | 5.00E-04     | TRUE         |
| 1     | LSSNFGAIS  | 948   | 956  | 9              | HLA-A*02:01 | 948           | 70             | 0.00050745  | 7.00E+01      | 5.00E-04     | TRUE         |
| 1     | SVYAWERKK  | 336   | 344  | 9              | HLA-A*02:01 | 336           | 70             | 0.00050365  | 7.00E+01      | 5.00E-04     | TRUE         |
| 1     | GPKLSTDLI  | 512   | 520  | 9              | HLA-A*02:01 | 512           | 70             | 0.00050349  | 7.00E+01      | 5.00E-04     | TRUE         |
| 1     | SKRFQPFQK  | 542   | 550  | 9              | HLA-A*02:01 | 542           | 70             | 0.00050229  | 7.00E+01      | 5.00E-04     | TRUE         |
| 1     | YFKNHTSPD  | 1137  | 1145 | 9              | HLA-A*02:01 | 1137          | 70             | 0.00049104  | 7.00E+01      | 5.00E-04     | TRUE         |
| 1     | LPFYSNVTG  | 60    | 68   | 9              | HLA-A*02:01 | 60            | 70             | 0.00049101  | 7.00E+01      | 5.00E-04     | TRUE         |
| 1     | DRNTRREVFA | 757   | 765  | 9              | HLA-A*02:01 | 757           | 70             | 0.00048438  | 7.00E+01      | 5.00E-04     | TRUE         |
| 1     | QKEIDRLNE  | 1162  | 1170 | 9              | HLA-A*02:01 | 1162          | 70             | 0.00048267  | 7.00E+01      | 5.00E-04     | TRUE         |
| 1     | CTQLNRALS  | 742   | 750  | 9              | HLA-A*02:01 | 742           | 70             | 0.00048252  | 7.00E+01      | 5.00E-04     | TRUE         |

| seq # | peptide    | start | end  | peptide length | allele      | peptide index | median binding | mhcnp score | mhcnp percent | legacy score | scores equal |
|-------|------------|-------|------|----------------|-------------|---------------|----------------|-------------|---------------|--------------|--------------|
| 1     | SNVYADSFV  | 380   | 388  | 9              | HLA-A*02:01 | 380           | 70             | 0.00048071  | 7.00E+01      | 5.00E-04     | TRUE         |
| 1     | NVVRGWVFG  | 96    | 104  | 9              | HLA-A*02:01 | 96            | 70             | 0.0004772   | 7.00E+01      | 5.00E-04     | TRUE         |
| 1     | KPTKRSFIE  | 793   | 801  | 9              | HLA-A*02:01 | 793           | 70             | 0.00047558  | 7.00E+01      | 5.00E-04     | TRUE         |
| 1     | DVQAPNYTQ  | 24    | 32   | 9              | HLA-A*02:01 | 24            | 70             | 0.00047557  | 7.00E+01      | 5.00E-04     | TRUE         |
| 1     | IVAYTMSLG  | 674   | 682  | 9              | HLA-A*02:01 | 674           | 71             | 0.00047062  | 7.10E+01      | 5.00E-04     | TRUE         |
| 1     | FPSVYAWER  | 334   | 342  | 9              | HLA-A*02:01 | 334           | 71             | 0.00046911  | 7.10E+01      | 5.00E-04     | TRUE         |
| 1     | YDENGITTD  | 266   | 274  | 9              | HLA-A*02:01 | 266           | 71             | 0.00046492  | 7.10E+01      | 5.00E-04     | TRUE         |
| 1     | ITQRNFFSP  | 1086  | 1094 | 9              | HLA-A*02:01 | 1086          | 71             | 0.0004647   | 7.10E+01      | 5.00E-04     | TRUE         |
| 1     | AAYFVGYLK  | 250   | 258  | 9              | HLA-A*02:01 | 250           | 71             | 0.00046412  | 7.10E+01      | 5.00E-04     | TRUE         |
| 1     | SGDVVRFPN  | 310   | 318  | 9              | HLA-A*02:01 | 310           | 71             | 0.00046365  | 7.10E+01      | 5.00E-04     | TRUE         |
| 1     | LKGACSCGS  | 1226  | 1234 | 9              | HLA-A*02:01 | 1226          | 71             | 0.00046071  | 7.10E+01      | 5.00E-04     | TRUE         |
| 1     | NVTGFHTIN  | 65    | 73   | 9              | HLA-A*02:01 | 65            | 71             | 0.00045993  | 7.10E+01      | 5.00E-04     | TRUE         |
| 1     | LGINITNFR  | 224   | 232  | 9              | HLA-A*02:01 | 224           | 71             | 0.00045883  | 7.10E+01      | 5.00E-04     | TRUE         |
| 1     | VTQNVLYEN  | 893   | 901  | 9              | HLA-A*02:01 | 893           | 71             | 0.00045521  | 7.10E+01      | 5.00E-04     | TRUE         |
| 1     | KFPSVYAVE  | 333   | 341  | 9              | HLA-A*02:01 | 333           | 71             | 0.00044808  | 7.10E+01      | 4.00E-04     | TRUE         |
| 1     | ATSTGNVNY  | 430   | 438  | 9              | HLA-A*02:01 | 430           | 71             | 0.00044661  | 7.10E+01      | 4.00E-04     | TRUE         |
| 1     | CGKGYHLMS  | 1025  | 1033 | 9              | HLA-A*02:01 | 1025          | 71             | 0.00044605  | 7.10E+01      | 4.00E-04     | TRUE         |
| 1     | VKQMYKTPT  | 767   | 775  | 9              | HLA-A*02:01 | 767           | 71             | 0.00043931  | 7.10E+01      | 4.00E-04     | TRUE         |
| 1     | PLKPTKRSF  | 791   | 799  | 9              | HLA-A*02:01 | 791           | 71             | 0.00043748  | 7.10E+01      | 4.00E-04     | TRUE         |
| 1     | GRLQSLQTY  | 981   | 989  | 9              | HLA-A*02:01 | 981           | 71             | 0.00043666  | 7.10E+01      | 4.00E-04     | TRUE         |
| 1     | CVNFFNGL   | 524   | 532  | 9              | HLA-A*02:01 | 524           | 72             | 0.00043565  | 7.20E+01      | 4.00E-04     | TRUE         |
| 1     | MAKTSVDCN  | 713   | 721  | 9              | HLA-A*02:01 | 713           | 72             | 0.00043292  | 7.20E+01      | 4.00E-04     | TRUE         |
| 1     | TGVLTPSSK  | 535   | 543  | 9              | HLA-A*02:01 | 535           | 72             | 0.00043256  | 7.20E+01      | 4.00E-04     | TRUE         |
| 1     | ATKLNLCF   | 371   | 379  | 9              | HLA-A*02:01 | 371           | 72             | 0.00042925  | 7.20E+01      | 4.00E-04     | TRUE         |
| 1     | VVIRACNFE  | 123   | 131  | 9              | HLA-A*02:01 | 123           | 72             | 0.00042697  | 7.20E+01      | 4.00E-04     | TRUE         |
| 1     | YGVSATKLN  | 367   | 375  | 9              | HLA-A*02:01 | 367           | 72             | 0.00042102  | 7.20E+01      | 4.00E-04     | TRUE         |
| 1     | KYFGGFNFS  | 777   | 785  | 9              | HLA-A*02:01 | 777           | 72             | 0.00041986  | 7.20E+01      | 4.00E-04     | TRUE         |
| 1     | MVTILLCCM  | 1211  | 1219 | 9              | HLA-A*02:01 | 1211          | 72             | 0.00041872  | 7.20E+01      | 4.00E-04     | TRUE         |
| 1     | AMQMAYRFN  | 881   | 889  | 9              | HLA-A*02:01 | 881           | 72             | 0.00041714  | 7.20E+01      | 4.00E-04     | TRUE         |
| 1     | LCPFGEVFN  | 322   | 330  | 9              | HLA-A*02:01 | 322           | 72             | 0.00041589  | 7.20E+01      | 4.00E-04     | TRUE         |
| 1     | LVKQLSSNF  | 944   | 952  | 9              | HLA-A*02:01 | 944           | 72             | 0.00040883  | 7.20E+01      | 4.00E-04     | TRUE         |
| 1     | FSNVYADSF  | 379   | 387  | 9              | HLA-A*02:01 | 379           | 72             | 0.00040855  | 7.20E+01      | 4.00E-04     | TRUE         |
| 1     | ATEKSNVVR  | 91    | 99   | 9              | HLA-A*02:01 | 91            | 72             | 0.00040598  | 7.20E+01      | 4.00E-04     | TRUE         |
| 1     | YGSFCTQLN  | 738   | 746  | 9              | HLA-A*02:01 | 738           | 73             | 0.00039723  | 7.30E+01      | 4.00E-04     | TRUE         |
| 1     | EDDSEPVLK  | 1240  | 1248 | 9              | HLA-A*02:01 | 1240          | 73             | 0.00039559  | 7.30E+01      | 4.00E-04     | TRUE         |
| 1     | AEHVDTSYE  | 639   | 647  | 9              | HLA-A*02:01 | 639           | 73             | 0.00039515  | 7.30E+01      | 4.00E-04     | TRUE         |
| 1     | WVFGSTMNN  | 101   | 109  | 9              | HLA-A*02:01 | 101           | 73             | 0.00039434  | 7.30E+01      | 4.00E-04     | TRUE         |
| 1     | VKQLSSNFG  | 945   | 953  | 9              | HLA-A*02:01 | 945           | 73             | 0.00038869  | 7.30E+01      | 4.00E-04     | TRUE         |
| 1     | PHGVVFLHV  | 1039  | 1047 | 9              | HLA-A*02:01 | 1039          | 73             | 0.00038654  | 7.30E+01      | 4.00E-04     | TRUE         |
| 1     | LQYGSFCTQ  | 736   | 744  | 9              | HLA-A*02:01 | 736           | 73             | 0.00038175  | 7.30E+01      | 4.00E-04     | TRUE         |
| 1     | MFIFLLFLT  | 1     | 9    | 9              | HLA-A*02:01 | 1             | 73             | 0.00037726  | 7.30E+01      | 4.00E-04     | TRUE         |
| 1     | SDFTDSDVRD | 556   | 564  | 9              | HLA-A*02:01 | 556           | 73             | 0.00037482  | 7.30E+01      | 4.00E-04     | TRUE         |
| 1     | PPFAVSKPM  | 136   | 144  | 9              | HLA-A*02:01 | 136           | 74             | 0.00037089  | 7.40E+01      | 4.00E-04     | TRUE         |
| 1     | ICASYHTVS  | 656   | 664  | 9              | HLA-A*02:01 | 656           | 74             | 0.00036543  | 7.40E+01      | 4.00E-04     | TRUE         |
| 1     | LAWNTRNID  | 421   | 429  | 9              | HLA-A*02:01 | 421           | 74             | 0.00036475  | 7.40E+01      | 4.00E-04     | TRUE         |
| 1     | PVLKGVKLH  | 1245  | 1253 | 9              | HLA-A*02:01 | 1245          | 74             | 0.00036047  | 7.40E+01      | 4.00E-04     | TRUE         |
| 1     | GWTFGAGAA  | 867   | 875  | 9              | HLA-A*02:01 | 867           | 74             | 0.00035893  | 7.40E+01      | 4.00E-04     | TRUE         |
| 1     | IDRLNEVAK  | 1165  | 1173 | 9              | HLA-A*02:01 | 1165          | 74             | 0.00035584  | 7.40E+01      | 4.00E-04     | TRUE         |
| 1     | EIRASANLA  | 999   | 1007 | 9              | HLA-A*02:01 | 999           | 74             | 0.00035396  | 7.40E+01      | 4.00E-04     | TRUE         |
| 1     | KGYHLMSFP  | 1027  | 1035 | 9              | HLA-A*02:01 | 1027          | 74             | 0.00034798  | 7.40E+01      | 3.00E-04     | TRUE         |
| 1     | CMTSCCSCL  | 1218  | 1226 | 9              | HLA-A*02:01 | 1218          | 74             | 0.00034711  | 7.40E+01      | 3.00E-04     | TRUE         |
| 1     | STMNNKSQS  | 105   | 113  | 9              | HLA-A*02:01 | 105           | 74             | 0.00034465  | 7.40E+01      | 3.00E-04     | TRUE         |
| 1     | PIDVVRDLP  | 202   | 210  | 9              | HLA-A*02:01 | 202           | 74             | 0.00034194  | 7.40E+01      | 3.00E-04     | TRUE         |
| 1     | LRHGKLRPF  | 443   | 451  | 9              | HLA-A*02:01 | 443           | 75             | 0.00033801  | 7.50E+01      | 3.00E-04     | TRUE         |
| 1     | EKSGNFKHL  | 174   | 182  | 9              | HLA-A*02:01 | 174           | 75             | 0.00033531  | 7.50E+01      | 3.00E-04     | TRUE         |
| 1     | ISNCVADYS  | 345   | 353  | 9              | HLA-A*02:01 | 345           | 75             | 0.00033521  | 7.50E+01      | 3.00E-04     | TRUE         |
| 1     | SMRGVYYPD  | 36    | 44   | 9              | HLA-A*02:01 | 36            | 75             | 0.00033144  | 7.50E+01      | 3.00E-04     | TRUE         |
| 1     | NGTITDAVD  | 269   | 277  | 9              | HLA-A*02:01 | 269           | 75             | 0.00033096  | 7.50E+01      | 3.00E-04     | TRUE         |
| 1     | APAICHEGK  | 1060  | 1068 | 9              | HLA-A*02:01 | 1060          | 75             | 0.00032965  | 7.50E+01      | 3.00E-04     | TRUE         |
| 1     | DVVRFPNIT  | 312   | 320  | 9              | HLA-A*02:01 | 312           | 75             | 0.00032903  | 7.50E+01      | 3.00E-04     | TRUE         |
| 1     | AIPTNFSIS  | 695   | 703  | 9              | HLA-A*02:01 | 695           | 75             | 0.00032711  | 7.50E+01      | 3.00E-04     | TRUE         |
| 1     | WGTSAAAYF  | 245   | 253  | 9              | HLA-A*02:01 | 245           | 75             | 0.00032463  | 7.50E+01      | 3.00E-04     | TRUE         |
| 1     | TILLCCMTS  | 1213  | 1221 | 9              | HLA-A*02:01 | 1213          | 75             | 0.00032353  | 7.50E+01      | 3.00E-04     | TRUE         |
| 1     | ALNCYWPLN  | 471   | 479  | 9              | HLA-A*02:01 | 471           | 75             | 0.00031728  | 7.50E+01      | 3.00E-04     | TRUE         |
| 1     | GVIADYNYK  | 403   | 411  | 9              | HLA-A*02:01 | 403           | 75             | 0.00031646  | 7.50E+01      | 3.00E-04     | TRUE         |
| 1     | STGNVNYKY  | 432   | 440  | 9              | HLA-A*02:01 | 432           | 75             | 0.00031644  | 7.50E+01      | 3.00E-04     | TRUE         |
| 1     | TLKYFGGFN  | 775   | 783  | 9              | HLA-A*02:01 | 775           | 76             | 0.00030733  | 7.60E+01      | 3.00E-04     | TRUE         |
| 1     | DVRQIAPGQ  | 393   | 401  | 9              | HLA-A*02:01 | 393           | 76             | 0.00030181  | 7.60E+01      | 3.00E-04     | TRUE         |
| 1     | VSEKSGNFK  | 172   | 180  | 9              | HLA-A*02:01 | 172           | 76             | 0.00030087  | 7.60E+01      | 3.00E-04     | TRUE         |
| 1     | TRNIDATST  | 425   | 433  | 9              | HLA-A*02:01 | 425           | 76             | 0.0002962   | 7.60E+01      | 3.00E-04     | TRUE         |
| 1     | AEQDRNTRE  | 754   | 762  | 9              | HLA-A*02:01 | 754           | 76             | 0.00029211  | 7.60E+01      | 3.00E-04     | TRUE         |
| 1     | QPYRVVVLS  | 492   | 500  | 9              | HLA-A*02:01 | 492           | 76             | 0.00029141  | 7.60E+01      | 3.00E-04     | TRUE         |
| 1     | TKLNLCFS   | 372   | 380  | 9              | HLA-A*02:01 | 372           | 76             | 0.00029069  | 7.60E+01      | 3.00E-04     | TRUE         |
| 1     | PFYSNVTFG  | 61    | 69   | 9              | HLA-A*02:01 | 61            | 76             | 0.00028658  | 7.60E+01      | 3.00E-04     | TRUE         |
| 1     | RHGKLRPFE  | 444   | 452  | 9              | HLA-A*02:01 | 444           | 77             | 0.00028424  | 7.70E+01      | 3.00E-04     | TRUE         |
| 1     | TTFMLKYDE  | 260   | 268  | 9              | HLA-A*02:01 | 260           | 77             | 0.00027596  | 7.70E+01      | 3.00E-04     | TRUE         |
| 1     | NFNFNGLTG  | 526   | 534  | 9              | HLA-A*02:01 | 526           | 77             | 0.00027272  | 7.70E+01      | 3.00E-04     | TRUE         |
| 1     | NNTVYDPLQ  | 1116  | 1124 | 9              | HLA-A*02:01 | 1116          | 77             | 0.00027049  | 7.70E+01      | 3.00E-04     | TRUE         |
| 1     | KNQCVNFFN  | 521   | 529  | 9              | HLA-A*02:01 | 521           | 77             | 0.00026574  | 7.70E+01      | 3.00E-04     | TRUE         |
| 1     | CVLAWNTRN  | 419   | 427  | 9              | HLA-A*02:01 | 419           | 77             | 0.00025975  | 7.70E+01      | 3.00E-04     | TRUE         |

| seq # | peptide    | start | end  | peptide length | allele      | peptide index | median binding | mhcnp score | mhcnp percent | legacy score | scores equal |
|-------|------------|-------|------|----------------|-------------|---------------|----------------|-------------|---------------|--------------|--------------|
| 1     | TDDMIAAYT  | 848   | 856  | 9              | HLA-A*02:01 | 848           | 78             | 0.00025449  | 7.80E+01      | 3.00E-04     | TRUE         |
| 1     | FEYISDAFS  | 161   | 169  | 9              | HLA-A*02:01 | 161           | 78             | 0.00025325  | 7.80E+01      | 3.00E-04     | TRUE         |
| 1     | QESLTTTST  | 917   | 925  | 9              | HLA-A*02:01 | 917           | 78             | 0.00025147  | 7.80E+01      | 3.00E-04     | TRUE         |
| 1     | YSVLVNSTF  | 352   | 360  | 9              | HLA-A*02:01 | 352           | 78             | 0.00024979  | 7.80E+01      | 2.00E-04     | TRUE         |
| 1     | SFKEELDKY  | 1129  | 1137 | 9              | HLA-A*02:01 | 1129          | 78             | 0.00024917  | 7.80E+01      | 2.00E-04     | TRUE         |
| 1     | MGCVLAWNT  | 417   | 425  | 9              | HLA-A*02:01 | 417           | 78             | 0.00024704  | 7.80E+01      | 2.00E-04     | TRUE         |
| 1     | TSWFITQRN  | 1082  | 1090 | 9              | HLA-A*02:01 | 1082          | 78             | 0.00024297  | 7.80E+01      | 2.00E-04     | TRUE         |
| 1     | LNEVAKNLN  | 1168  | 1176 | 9              | HLA-A*02:01 | 1168          | 78             | 0.00024047  | 7.80E+01      | 2.00E-04     | TRUE         |
| 1     | DDVQAPNYT  | 23    | 31   | 9              | HLA-A*02:01 | 23            | 78             | 0.00023802  | 7.80E+01      | 2.00E-04     | TRUE         |
| 1     | YHTVSLRLS  | 660   | 668  | 9              | HLA-A*02:01 | 660           | 78             | 0.00023766  | 7.80E+01      | 2.00E-04     | TRUE         |
| 1     | LTSGSDLDR  | 10    | 18   | 9              | HLA-A*02:01 | 10            | 78             | 0.00023756  | 7.80E+01      | 2.00E-04     | TRUE         |
| 1     | NFRVVPSPGD | 304   | 312  | 9              | HLA-A*02:01 | 304           | 78             | 0.00023692  | 7.80E+01      | 2.00E-04     | TRUE         |
| 1     | RVDFCGKGY  | 1021  | 1029 | 9              | HLA-A*02:01 | 1021          | 78             | 0.00023345  | 7.80E+01      | 2.00E-04     | TRUE         |
| 1     | VDFCGKGYH  | 1022  | 1030 | 9              | HLA-A*02:01 | 1022          | 78             | 0.00023327  | 7.80E+01      | 2.00E-04     | TRUE         |
| 1     | TSCCSCLKG  | 1220  | 1228 | 9              | HLA-A*02:01 | 1220          | 79             | 0.00022996  | 7.90E+01      | 2.00E-04     | TRUE         |
| 1     | WNTRNIDAT  | 423   | 431  | 9              | HLA-A*02:01 | 423           | 79             | 0.00022904  | 7.90E+01      | 2.00E-04     | TRUE         |
| 1     | QFGRDVSDF  | 550   | 558  | 9              | HLA-A*02:01 | 550           | 79             | 0.00022454  | 7.90E+01      | 2.00E-04     | TRUE         |
| 1     | LKCSVKSEFE | 286   | 294  | 9              | HLA-A*02:01 | 286           | 79             | 0.00022267  | 7.90E+01      | 2.00E-04     | TRUE         |
| 1     | NFSQILPDP  | 783   | 791  | 9              | HLA-A*02:01 | 783           | 79             | 0.0002225   | 7.90E+01      | 2.00E-04     | TRUE         |
| 1     | TSEILDISP  | 567   | 575  | 9              | HLA-A*02:01 | 567           | 79             | 0.00022246  | 7.90E+01      | 2.00E-04     | TRUE         |
| 1     | SDTLYLTDQ  | 49    | 57   | 9              | HLA-A*02:01 | 49            | 79             | 0.00021695  | 7.90E+01      | 2.00E-04     | TRUE         |
| 1     | DENGITITDA | 267   | 275  | 9              | HLA-A*02:01 | 267           | 79             | 0.00021669  | 7.90E+01      | 2.00E-04     | TRUE         |
| 1     | CCMTSCCSC  | 1217  | 1225 | 9              | HLA-A*02:01 | 1217          | 79             | 0.00021664  | 7.90E+01      | 2.00E-04     | TRUE         |
| 1     | PALNCYWPL  | 470   | 478  | 9              | HLA-A*02:01 | 470           | 79             | 0.0002164   | 7.90E+01      | 2.00E-04     | TRUE         |
| 1     | GFNFSQLP   | 781   | 789  | 9              | HLA-A*02:01 | 781           | 79             | 0.00021527  | 7.90E+01      | 2.00E-04     | TRUE         |
| 1     | DGFLYVYKG  | 191   | 199  | 9              | HLA-A*02:01 | 191           | 79             | 0.00021364  | 7.90E+01      | 2.00E-04     | TRUE         |
| 1     | DGIYFAATE  | 85    | 93   | 9              | HLA-A*02:01 | 85            | 80             | 0.0002069   | 8.00E+01      | 2.00E-04     | TRUE         |
| 1     | VAVLYQDVN  | 594   | 602  | 9              | HLA-A*02:01 | 594           | 80             | 0.00020638  | 8.00E+01      | 2.00E-04     | TRUE         |
| 1     | REGVVFVNG  | 1073  | 1081 | 9              | HLA-A*02:01 | 1073          | 80             | 0.00020308  | 8.00E+01      | 2.00E-04     | TRUE         |
| 1     | LRPFERDIS  | 448   | 456  | 9              | HLA-A*02:01 | 448           | 80             | 0.00020225  | 8.00E+01      | 2.00E-04     | TRUE         |
| 1     | SVKSFEIDK  | 289   | 297  | 9              | HLA-A*02:01 | 289           | 80             | 0.00020058  | 8.00E+01      | 2.00E-04     | TRUE         |
| 1     | YKYRYLRHG  | 438   | 446  | 9              | HLA-A*02:01 | 438           | 80             | 0.00019922  | 8.00E+01      | 2.00E-04     | TRUE         |
| 1     | ERDISNVFP  | 452   | 460  | 9              | HLA-A*02:01 | 452           | 80             | 0.00019856  | 8.00E+01      | 2.00E-04     | TRUE         |
| 1     | NVIRACNF   | 122   | 130  | 9              | HLA-A*02:01 | 122           | 80             | 0.00019789  | 8.00E+01      | 2.00E-04     | TRUE         |
| 1     | PVDLDGDIS  | 1144  | 1152 | 9              | HLA-A*02:01 | 1144          | 80             | 0.00019772  | 8.00E+01      | 2.00E-04     | TRUE         |
| 1     | SPCSFGGVS  | 574   | 582  | 9              | HLA-A*02:01 | 574           | 80             | 0.00019677  | 8.00E+01      | 2.00E-04     | TRUE         |
| 1     | VEAEVQIDR  | 969   | 977  | 9              | HLA-A*02:01 | 969           | 80             | 0.00019404  | 8.00E+01      | 2.00E-04     | TRUE         |
| 1     | KSIVAYTMS  | 672   | 680  | 9              | HLA-A*02:01 | 672           | 80             | 0.00019365  | 8.00E+01      | 2.00E-04     | TRUE         |
| 1     | KDGLFVYVK  | 190   | 198  | 9              | HLA-A*02:01 | 190           | 81             | 0.00019081  | 8.10E+01      | 2.00E-04     | TRUE         |
| 1     | MSECVLGQS  | 1011  | 1019 | 9              | HLA-A*02:01 | 1011          | 81             | 0.00018901  | 8.10E+01      | 2.00E-04     | TRUE         |
| 1     | QTGVIADYN  | 401   | 409  | 9              | HLA-A*02:01 | 401           | 81             | 0.00018633  | 8.10E+01      | 2.00E-04     | TRUE         |
| 1     | DCSQNLAE   | 277   | 285  | 9              | HLA-A*02:01 | 277           | 81             | 0.00018579  | 8.10E+01      | 2.00E-04     | TRUE         |
| 1     | TFGAGAAALQ | 869   | 877  | 9              | HLA-A*02:01 | 869           | 81             | 0.0001857   | 8.10E+01      | 2.00E-04     | TRUE         |
| 1     | TTGIGYQPY  | 486   | 494  | 9              | HLA-A*02:01 | 486           | 81             | 0.00017797  | 8.10E+01      | 2.00E-04     | TRUE         |
| 1     | TPGTNASSE  | 585   | 593  | 9              | HLA-A*02:01 | 585           | 81             | 0.00017574  | 8.10E+01      | 2.00E-04     | TRUE         |
| 1     | VFAQVKQMY  | 763   | 771  | 9              | HLA-A*02:01 | 763           | 81             | 0.0001748   | 8.10E+01      | 2.00E-04     | TRUE         |
| 1     | SYECDIPIG  | 645   | 653  | 9              | HLA-A*02:01 | 645           | 82             | 0.00017265  | 8.20E+01      | 2.00E-04     | TRUE         |
| 1     | DSVRDPKTS  | 560   | 568  | 9              | HLA-A*02:01 | 560           | 82             | 0.00017214  | 8.20E+01      | 2.00E-04     | TRUE         |
| 1     | FHTINHTFG  | 69    | 77   | 9              | HLA-A*02:01 | 69            | 82             | 0.00017201  | 8.20E+01      | 2.00E-04     | TRUE         |
| 1     | IGIINNTVY  | 1112  | 1120 | 9              | HLA-A*02:01 | 1112          | 82             | 0.00017089  | 8.20E+01      | 2.00E-04     | TRUE         |
| 1     | NNSTNVVIR  | 118   | 126  | 9              | HLA-A*02:01 | 118           | 82             | 0.00016828  | 8.20E+01      | 2.00E-04     | TRUE         |
| 1     | TFMLKYDEN  | 261   | 269  | 9              | HLA-A*02:01 | 261           | 82             | 0.00016801  | 8.20E+01      | 2.00E-04     | TRUE         |
| 1     | SSKRFQPFQ  | 541   | 549  | 9              | HLA-A*02:01 | 541           | 83             | 0.00016034  | 8.30E+01      | 2.00E-04     | TRUE         |
| 1     | DVNCTDVST  | 600   | 608  | 9              | HLA-A*02:01 | 600           | 83             | 0.00015876  | 8.30E+01      | 2.00E-04     | TRUE         |
| 1     | ECANLLQY   | 730   | 738  | 9              | HLA-A*02:01 | 730           | 83             | 0.00015532  | 8.30E+01      | 2.00E-04     | TRUE         |
| 1     | VNFNFNGLT  | 525   | 533  | 9              | HLA-A*02:01 | 525           | 83             | 0.00015326  | 8.30E+01      | 2.00E-04     | TRUE         |
| 1     | LYENKQKIA  | 898   | 906  | 9              | HLA-A*02:01 | 898           | 83             | 0.00015271  | 8.30E+01      | 2.00E-04     | TRUE         |
| 1     | CSCGSCCKF  | 1230  | 1238 | 9              | HLA-A*02:01 | 1230          | 83             | 0.0001526   | 8.30E+01      | 2.00E-04     | TRUE         |
| 1     | PDPLKPTKR  | 789   | 797  | 9              | HLA-A*02:01 | 789           | 83             | 0.00015244  | 8.30E+01      | 2.00E-04     | TRUE         |
| 1     | GAEHVDTSY  | 638   | 646  | 9              | HLA-A*02:01 | 638           | 83             | 0.00014558  | 8.30E+01      | 1.00E-04     | TRUE         |
| 1     | IFKLPLGIN  | 219   | 227  | 9              | HLA-A*02:01 | 219           | 83             | 0.00014557  | 8.30E+01      | 1.00E-04     | TRUE         |
| 1     | QTSNFRVVP  | 301   | 309  | 9              | HLA-A*02:01 | 301           | 83             | 0.00014533  | 8.30E+01      | 1.00E-04     | TRUE         |
| 1     | CYGVSATKL  | 366   | 374  | 9              | HLA-A*02:01 | 366           | 83             | 0.00014489  | 8.30E+01      | 1.00E-04     | TRUE         |
| 1     | TPPALNCYW  | 468   | 476  | 9              | HLA-A*02:01 | 468           | 83             | 0.0001436   | 8.30E+01      | 1.00E-04     | TRUE         |
| 1     | YIKWPWYVW  | 1191  | 1199 | 9              | HLA-A*02:01 | 1191          | 84             | 0.00014297  | 8.40E+01      | 1.00E-04     | TRUE         |
| 1     | AAEQDRNTR  | 753   | 761  | 9              | HLA-A*02:01 | 753           | 84             | 0.00014269  | 8.40E+01      | 1.00E-04     | TRUE         |
| 1     | LPSGFNTLK  | 209   | 217  | 9              | HLA-A*02:01 | 209           | 84             | 0.00014249  | 8.40E+01      | 1.00E-04     | TRUE         |
| 1     | YENQKQIAN  | 899   | 907  | 9              | HLA-A*02:01 | 899           | 84             | 0.00014239  | 8.40E+01      | 1.00E-04     | TRUE         |
| 1     | PQIITDNT   | 1094  | 1102 | 9              | HLA-A*02:01 | 1094          | 84             | 0.00014187  | 8.40E+01      | 1.00E-04     | TRUE         |
| 1     | VNQNAQALN  | 934   | 942  | 9              | HLA-A*02:01 | 934           | 84             | 0.00014183  | 8.40E+01      | 1.00E-04     | TRUE         |
| 1     | DLDRCTTFD  | 15    | 23   | 9              | HLA-A*02:01 | 15            | 84             | 0.0001413   | 8.40E+01      | 1.00E-04     | TRUE         |
| 1     | PNYTQHTSS  | 28    | 36   | 9              | HLA-A*02:01 | 28            | 84             | 0.00014076  | 8.40E+01      | 1.00E-04     | TRUE         |
| 1     | PFQQFGRDV  | 547   | 555  | 9              | HLA-A*02:01 | 547           | 84             | 0.00013963  | 8.40E+01      | 1.00E-04     | TRUE         |
| 1     | ELKCSVKSF  | 285   | 293  | 9              | HLA-A*02:01 | 285           | 84             | 0.00013936  | 8.40E+01      | 1.00E-04     | TRUE         |
| 1     | VPFSPDGKP  | 458   | 466  | 9              | HLA-A*02:01 | 458           | 84             | 0.00013867  | 8.40E+01      | 1.00E-04     | TRUE         |
| 1     | VPSQERNFT  | 1050  | 1058 | 9              | HLA-A*02:01 | 1050          | 84             | 0.00013668  | 8.40E+01      | 1.00E-04     | TRUE         |
| 1     | HTSSMRGVY  | 33    | 41   | 9              | HLA-A*02:01 | 33            | 84             | 0.00013476  | 8.40E+01      | 1.00E-04     | TRUE         |
| 1     | NQKQIANQF  | 901   | 909  | 9              | HLA-A*02:01 | 901           | 84             | 0.00013422  | 8.40E+01      | 1.00E-04     | TRUE         |
| 1     | KWPWVWVLG  | 1193  | 1201 | 9              | HLA-A*02:01 | 1193          | 84             | 0.0001339   | 8.40E+01      | 1.00E-04     | TRUE         |
| 1     | TDNTFVSGN  | 1099  | 1107 | 9              | HLA-A*02:01 | 1099          | 84             | 0.00013218  | 8.40E+01      | 1.00E-04     | TRUE         |

| seq # | peptide   | start | end  | peptide length | allele      | peptide index | median binding | mhcnp score | mhcnp percent | legacy score | scores equal |
|-------|-----------|-------|------|----------------|-------------|---------------|----------------|-------------|---------------|--------------|--------------|
| 1     | NFRALITAF | 230   | 238  | 9              | HLA-A*02:01 | 230           | 84             | 0.000132    | 8.40E+01      | 1.00E-04     | TRUE         |
| 1     | KYDENGIT  | 265   | 273  | 9              | HLA-A*02:01 | 265           | 84             | 0.00013182  | 8.40E+01      | 1.00E-04     | TRUE         |
| 1     | NDLCSNVY  | 375   | 383  | 9              | HLA-A*02:01 | 375           | 84             | 0.00013164  | 8.40E+01      | 1.00E-04     | TRUE         |
| 1     | QDVVNQNAQ | 931   | 939  | 9              | HLA-A*02:01 | 931           | 84             | 0.0001314   | 8.40E+01      | 1.00E-04     | TRUE         |
| 1     | REVFAQVKQ | 761   | 769  | 9              | HLA-A*02:01 | 761           | 84             | 0.00012965  | 8.40E+01      | 1.00E-04     | TRUE         |
| 1     | CSVKSFEID | 288   | 296  | 9              | HLA-A*02:01 | 288           | 84             | 0.00012928  | 8.40E+01      | 1.00E-04     | TRUE         |
| 1     | QPELDSFKE | 1124  | 1132 | 9              | HLA-A*02:01 | 1124          | 84             | 0.00012876  | 8.40E+01      | 1.00E-04     | TRUE         |
| 1     | TDAVDCSQN | 273   | 281  | 9              | HLA-A*02:01 | 273           | 85             | 0.00012597  | 8.50E+01      | 1.00E-04     | TRUE         |
| 1     | FYSNVTFGH | 62    | 70   | 9              | HLA-A*02:01 | 62            | 85             | 0.00012582  | 8.50E+01      | 1.00E-04     | TRUE         |
| 1     | DVVGIIINN | 1109  | 1117 | 9              | HLA-A*02:01 | 1109          | 85             | 0.00012555  | 8.50E+01      | 1.00E-04     | TRUE         |
| 1     | NYKLPPDFM | 409   | 417  | 9              | HLA-A*02:01 | 409           | 85             | 0.00012457  | 8.50E+01      | 1.00E-04     | TRUE         |
| 1     | TEKSNVVRG | 92    | 100  | 9              | HLA-A*02:01 | 92            | 85             | 0.00012432  | 8.50E+01      | 1.00E-04     | TRUE         |
| 1     | QNVLYENQK | 895   | 903  | 9              | HLA-A*02:01 | 895           | 85             | 0.00012345  | 8.50E+01      | 1.00E-04     | TRUE         |
| 1     | LDKYFKNHT | 1134  | 1142 | 9              | HLA-A*02:01 | 1134          | 85             | 0.00012323  | 8.50E+01      | 1.00E-04     | TRUE         |
| 1     | SKPMGTQTH | 141   | 149  | 9              | HLA-A*02:01 | 141           | 85             | 0.00012238  | 8.50E+01      | 1.00E-04     | TRUE         |
| 1     | NTRNIDATS | 424   | 432  | 9              | HLA-A*02:01 | 424           | 85             | 0.00012004  | 8.50E+01      | 1.00E-04     | TRUE         |
| 1     | VFGSTMNNK | 102   | 110  | 9              | HLA-A*02:01 | 102           | 85             | 0.00011974  | 8.50E+01      | 1.00E-04     | TRUE         |
| 1     | TGVIADYNY | 402   | 410  | 9              | HLA-A*02:01 | 402           | 85             | 0.00011958  | 8.50E+01      | 1.00E-04     | TRUE         |
| 1     | DRLNEVAKN | 1166  | 1174 | 9              | HLA-A*02:01 | 1166          | 85             | 0.00011795  | 8.50E+01      | 1.00E-04     | TRUE         |
| 1     | QELGKYEYQ | 1183  | 1191 | 9              | HLA-A*02:01 | 1183          | 85             | 0.00011577  | 8.50E+01      | 1.00E-04     | TRUE         |
| 1     | DDFMGCVLA | 414   | 422  | 9              | HLA-A*02:01 | 414           | 85             | 0.00011573  | 8.50E+01      | 1.00E-04     | TRUE         |
| 1     | NAFNCTFEY | 155   | 163  | 9              | HLA-A*02:01 | 155           | 85             | 0.00011553  | 8.50E+01      | 1.00E-04     | TRUE         |
| 1     | QSKRVDFCG | 1018  | 1026 | 9              | HLA-A*02:01 | 1018          | 85             | 0.00011491  | 8.50E+01      | 1.00E-04     | TRUE         |
| 1     | WERKKISNC | 340   | 348  | 9              | HLA-A*02:01 | 340           | 86             | 0.00011442  | 8.60E+01      | 1.00E-04     | TRUE         |
| 1     | TECANLLQ  | 729   | 737  | 9              | HLA-A*02:01 | 729           | 86             | 0.00011431  | 8.60E+01      | 1.00E-04     | TRUE         |
| 1     | VTILCCGMT | 1212  | 1220 | 9              | HLA-A*02:01 | 1212          | 86             | 0.00011345  | 8.60E+01      | 1.00E-04     | TRUE         |
| 1     | CGSCCKFDE | 1232  | 1240 | 9              | HLA-A*02:01 | 1232          | 86             | 0.00011332  | 8.60E+01      | 1.00E-04     | TRUE         |
| 1     | RSDTLYLTQ | 48    | 56   | 9              | HLA-A*02:01 | 48            | 86             | 0.00011311  | 8.60E+01      | 1.00E-04     | TRUE         |
| 1     | FNGTSWFIT | 1079  | 1087 | 9              | HLA-A*02:01 | 1079          | 86             | 0.00010805  | 8.60E+01      | 1.00E-04     | TRUE         |
| 1     | DLICAQKFN | 830   | 838  | 9              | HLA-A*02:01 | 830           | 86             | 0.00010768  | 8.60E+01      | 1.00E-04     | TRUE         |
| 1     | VYAWERKKI | 337   | 345  | 9              | HLA-A*02:01 | 337           | 86             | 0.00010687  | 8.60E+01      | 1.00E-04     | TRUE         |
| 1     | MKQYGECLG | 816   | 824  | 9              | HLA-A*02:01 | 816           | 86             | 0.00010685  | 8.60E+01      | 1.00E-04     | TRUE         |
| 1     | NDILSRDLK | 960   | 968  | 9              | HLA-A*02:01 | 960           | 86             | 0.00010642  | 8.60E+01      | 1.00E-04     | TRUE         |
| 1     | YRVVVLSEF | 494   | 502  | 9              | HLA-A*02:01 | 494           | 86             | 0.00010622  | 8.60E+01      | 1.00E-04     | TRUE         |
| 1     | TPSSKRFPQ | 539   | 547  | 9              | HLA-A*02:01 | 539           | 86             | 0.00010592  | 8.60E+01      | 1.00E-04     | TRUE         |
| 1     | THTMIFDNA | 148   | 156  | 9              | HLA-A*02:01 | 148           | 86             | 0.00010534  | 8.60E+01      | 1.00E-04     | TRUE         |
| 1     | YNYKYRYLR | 436   | 444  | 9              | HLA-A*02:01 | 436           | 86             | 0.00010379  | 8.60E+01      | 1.00E-04     | TRUE         |
| 1     | RKKISNCVA | 342   | 350  | 9              | HLA-A*02:01 | 342           | 86             | 0.00010347  | 8.60E+01      | 1.00E-04     | TRUE         |
| 1     | LTPSSKRFP | 538   | 546  | 9              | HLA-A*02:01 | 538           | 86             | 0.00010215  | 8.60E+01      | 1.00E-04     | TRUE         |
| 1     | CYWPLNDYG | 474   | 482  | 9              | HLA-A*02:01 | 474           | 87             | 9.78E-05    | 8.70E+01      | 1.00E-04     | TRUE         |
| 1     | EIFRSDTLY | 45    | 53   | 9              | HLA-A*02:01 | 45            | 87             | 9.74E-05    | 8.70E+01      | 1.00E-04     | TRUE         |
| 1     | GAGICASYH | 653   | 661  | 9              | HLA-A*02:01 | 653           | 87             | 9.65E-05    | 8.70E+01      | 1.00E-04     | TRUE         |
| 1     | IYSTGNVNF | 621   | 629  | 9              | HLA-A*02:01 | 621           | 87             | 9.58E-05    | 8.70E+01      | 1.00E-04     | TRUE         |
| 1     | NPFFAVSKP | 135   | 143  | 9              | HLA-A*02:01 | 135           | 87             | 9.48E-05    | 8.70E+01      | 1.00E-04     | TRUE         |
| 1     | DLFLPFYSN | 57    | 65   | 9              | HLA-A*02:01 | 57            | 87             | 9.09E-05    | 8.70E+01      | 1.00E-04     | TRUE         |
| 1     | SCCKFDEDD | 1234  | 1242 | 9              | HLA-A*02:01 | 1234          | 87             | 9.06E-05    | 8.70E+01      | 1.00E-04     | TRUE         |
| 1     | ACSCGSCCK | 1229  | 1237 | 9              | HLA-A*02:01 | 1229          | 87             | 8.75E-05    | 8.70E+01      | 1.00E-04     | TRUE         |
| 1     | DLKNQCQVN | 518   | 526  | 9              | HLA-A*02:01 | 518           | 88             | 8.71E-05    | 8.80E+01      | 1.00E-04     | TRUE         |
| 1     | QDVNCTDVS | 599   | 607  | 9              | HLA-A*02:01 | 599           | 88             | 8.70E-05    | 8.80E+01      | 1.00E-04     | TRUE         |
| 1     | SYHTVSLLR | 659   | 667  | 9              | HLA-A*02:01 | 659           | 88             | 8.38E-05    | 8.80E+01      | 1.00E-04     | TRUE         |
| 1     | VDCNMYICG | 718   | 726  | 9              | HLA-A*02:01 | 718           | 88             | 8.30E-05    | 8.80E+01      | 1.00E-04     | TRUE         |
| 1     | LKPTTFMLK | 257   | 265  | 9              | HLA-A*02:01 | 257           | 88             | 8.12E-05    | 8.80E+01      | 1.00E-04     | TRUE         |
| 1     | QDRNTREVF | 756   | 764  | 9              | HLA-A*02:01 | 756           | 88             | 8.11E-05    | 8.80E+01      | 1.00E-04     | TRUE         |
| 1     | NGTSWFITQ | 1080  | 1088 | 9              | HLA-A*02:01 | 1080          | 88             | 8.07E-05    | 8.80E+01      | 1.00E-04     | TRUE         |
| 1     | PTLKYFGGF | 774   | 782  | 9              | HLA-A*02:01 | 774           | 88             | 7.89E-05    | 8.80E+01      | 1.00E-04     | TRUE         |
| 1     | YWPLNDYGF | 475   | 483  | 9              | HLA-A*02:01 | 475           | 88             | 7.81E-05    | 8.80E+01      | 1.00E-04     | TRUE         |
| 1     | GEVFNATKF | 326   | 334  | 9              | HLA-A*02:01 | 326           | 88             | 7.80E-05    | 8.80E+01      | 1.00E-04     | TRUE         |
| 1     | TGNNVFQQT | 624   | 632  | 9              | HLA-A*02:01 | 624           | 88             | 7.70E-05    | 8.80E+01      | 1.00E-04     | TRUE         |
| 1     | FYTTTGIGY | 483   | 491  | 9              | HLA-A*02:01 | 483           | 88             | 7.70E-05    | 8.80E+01      | 1.00E-04     | TRUE         |
| 1     | PDDFMGCVL | 413   | 421  | 9              | HLA-A*02:01 | 413           | 89             | 7.62E-05    | 8.90E+01      | 1.00E-04     | TRUE         |
| 1     | EDLLFNKVT | 801   | 809  | 9              | HLA-A*02:01 | 801           | 89             | 7.61E-05    | 8.90E+01      | 1.00E-04     | TRUE         |
| 1     | MYICGDSDE | 722   | 730  | 9              | HLA-A*02:01 | 722           | 89             | 7.58E-05    | 8.90E+01      | 1.00E-04     | TRUE         |
| 1     | TQNVLYENQ | 894   | 902  | 9              | HLA-A*02:01 | 894           | 89             | 7.43E-05    | 8.90E+01      | 1.00E-04     | TRUE         |
| 1     | LYQDVNCTD | 597   | 605  | 9              | HLA-A*02:01 | 597           | 89             | 7.34E-05    | 8.90E+01      | 1.00E-04     | TRUE         |
| 1     | DNTFVSGNC | 1100  | 1108 | 9              | HLA-A*02:01 | 1100          | 89             | 7.13E-05    | 8.90E+01      | 1.00E-04     | TRUE         |
| 1     | LPPLLTDDM | 843   | 851  | 9              | HLA-A*02:01 | 843           | 89             | 7.10E-05    | 8.90E+01      | 1.00E-04     | TRUE         |
| 1     | FNCTFEYIS | 157   | 165  | 9              | HLA-A*02:01 | 157           | 89             | 7.09E-05    | 8.90E+01      | 1.00E-04     | TRUE         |
| 1     | LYNSTFFST | 355   | 363  | 9              | HLA-A*02:01 | 355           | 89             | 0.00007077  | 8.90E+01      | 1.00E-04     | TRUE         |
| 1     | DAVDCSQNP | 274   | 282  | 9              | HLA-A*02:01 | 274           | 89             | 7.02E-05    | 8.90E+01      | 1.00E-04     | TRUE         |
| 1     | TQRNFFSPQ | 1087  | 1095 | 9              | HLA-A*02:01 | 1087          | 89             | 6.79E-05    | 8.90E+01      | 1.00E-04     | TRUE         |
| 1     | NPVIPFKDG | 78    | 86   | 9              | HLA-A*02:01 | 78            | 89             | 6.77E-05    | 8.90E+01      | 1.00E-04     | TRUE         |
| 1     | PSGDVVRFP | 309   | 317  | 9              | HLA-A*02:01 | 309           | 90             | 6.45E-05    | 9.00E+01      | 1.00E-04     | TRUE         |
| 1     | SEPVLLGVK | 1243  | 1251 | 9              | HLA-A*02:01 | 1243          | 90             | 6.38E-05    | 9.00E+01      | 1.00E-04     | TRUE         |
| 1     | EVQIDRLIT | 972   | 980  | 9              | HLA-A*02:01 | 972           | 90             | 6.36E-05    | 9.00E+01      | 1.00E-04     | TRUE         |
| 1     | IDKGIYQTS | 295   | 303  | 9              | HLA-A*02:01 | 295           | 90             | 6.26E-05    | 9.00E+01      | 1.00E-04     | TRUE         |
| 1     | IPFAMQMAY | 878   | 886  | 9              | HLA-A*02:01 | 878           | 90             | 6.19E-05    | 9.00E+01      | 1.00E-04     | TRUE         |
| 1     | GNYNKYRY  | 434   | 442  | 9              | HLA-A*02:01 | 434           | 90             | 6.15E-05    | 9.00E+01      | 1.00E-04     | TRUE         |
| 1     | TYVPSQERN | 1048  | 1056 | 9              | HLA-A*02:01 | 1048          | 90             | 6.06E-05    | 9.00E+01      | 1.00E-04     | TRUE         |
| 1     | TPTLKYFGG | 773   | 781  | 9              | HLA-A*02:01 | 773           | 90             | 6.00E-05    | 9.00E+01      | 1.00E-04     | TRUE         |
| 1     | YEYIKWPWW | 1188  | 1196 | 9              | HLA-A*02:01 | 1188          | 90             | 5.93E-05    | 9.00E+01      | 1.00E-04     | TRUE         |

| seq # | peptide     | start | end  | peptide length | allele      | peptide index | median binding | mhcnp score | mhcnp percent | legacy score | scores equal |
|-------|-------------|-------|------|----------------|-------------|---------------|----------------|-------------|---------------|--------------|--------------|
| 1     | YNSTFFSTF   | 356   | 364  | 9              | HLA-A*02:01 | 356           | 90             | 5.86E-05    | 9.00E+01      | 1.00E-04     | TRUE         |
| 1     | REFVFNKD    | 183   | 191  | 9              | HLA-A*02:01 | 183           | 90             | 5.79E-05    | 9.00E+01      | 1.00E-04     | TRUE         |
| 1     | WVYVWLGFA   | 1196  | 1204 | 9              | HLA-A*02:01 | 1196          | 90             | 5.77E-05    | 9.00E+01      | 1.00E-04     | TRUE         |
| 1     | ACNFELCDN   | 127   | 135  | 9              | HLA-A*02:01 | 127           | 90             | 5.76E-05    | 9.00E+01      | 1.00E-04     | TRUE         |
| 1     | STFKCYGVS   | 362   | 370  | 9              | HLA-A*02:01 | 362           | 90             | 5.69E-05    | 9.00E+01      | 1.00E-04     | TRUE         |
| 1     | LGKYEYQIK   | 1185  | 1193 | 9              | HLA-A*02:01 | 1185          | 90             | 5.64E-05    | 9.00E+01      | 1.00E-04     | TRUE         |
| 1     | PELDSFKEE   | 1125  | 1133 | 9              | HLA-A*02:01 | 1125          | 90             | 5.52E-05    | 9.00E+01      | 1.00E-04     | TRUE         |
| 1     | PSGFNTLKP   | 210   | 218  | 9              | HLA-A*02:01 | 210           | 90             | 5.52E-05    | 9.00E+01      | 1.00E-04     | TRUE         |
| 1     | PDGKPCPTP   | 462   | 470  | 9              | HLA-A*02:01 | 462           | 90             | 5.51E-05    | 9.00E+01      | 1.00E-04     | TRUE         |
| 1     | PFAMQPMAYR  | 879   | 887  | 9              | HLA-A*02:01 | 879           | 90             | 5.48E-05    | 9.00E+01      | 1.00E-04     | TRUE         |
| 1     | EGKAYFPRE   | 1066  | 1074 | 9              | HLA-A*02:01 | 1066          | 91             | 5.48E-05    | 9.10E+01      | 1.00E-04     | TRUE         |
| 1     | YGECLGDIN   | 819   | 827  | 9              | HLA-A*02:01 | 819           | 91             | 5.45E-05    | 9.10E+01      | 1.00E-04     | TRUE         |
| 1     | KTSVDCNMY   | 715   | 723  | 9              | HLA-A*02:01 | 715           | 91             | 5.44E-05    | 9.10E+01      | 1.00E-04     | TRUE         |
| 1     | GYHLMSFPQ   | 1028  | 1036 | 9              | HLA-A*02:01 | 1028          | 91             | 5.36E-05    | 9.10E+01      | 1.00E-04     | TRUE         |
| 1     | QTHMIFDN    | 147   | 155  | 9              | HLA-A*02:01 | 147           | 91             | 5.33E-05    | 9.10E+01      | 1.00E-04     | TRUE         |
| 1     | PAQDIWGTG   | 240   | 248  | 9              | HLA-A*02:01 | 240           | 91             | 5.32E-05    | 9.10E+01      | 1.00E-04     | TRUE         |
| 1     | PAWRIYSTG   | 617   | 625  | 9              | HLA-A*02:01 | 617           | 91             | 5.26E-05    | 9.10E+01      | 1.00E-04     | TRUE         |
| 1     | IKNQCVNFN   | 520   | 528  | 9              | HLA-A*02:01 | 520           | 91             | 5.25E-05    | 9.10E+01      | 1.00E-04     | TRUE         |
| 1     | ELDKYFNKH   | 1133  | 1141 | 9              | HLA-A*02:01 | 1133          | 91             | 5.09E-05    | 9.10E+01      | 1.00E-04     | TRUE         |
| 1     | GSTMNKSQ    | 104   | 112  | 9              | HLA-A*02:01 | 104           | 91             | 5.06E-05    | 9.10E+01      | 1.00E-04     | TRUE         |
| 1     | QERNFTTAP   | 1053  | 1061 | 9              | HLA-A*02:01 | 1053          | 91             | 4.92E-05    | 9.10E+01      | 0.00E+00     | TRUE         |
| 1     | VYADSFVVK   | 382   | 390  | 9              | HLA-A*02:01 | 382           | 91             | 4.92E-05    | 9.10E+01      | 0.00E+00     | TRUE         |
| 1     | PSSKRFQPF   | 540   | 548  | 9              | HLA-A*02:01 | 540           | 91             | 4.91E-05    | 9.10E+01      | 0.00E+00     | TRUE         |
| 1     | TNVVIRACN   | 121   | 129  | 9              | HLA-A*02:01 | 121           | 91             | 4.89E-05    | 9.10E+01      | 0.00E+00     | TRUE         |
| 1     | DKYFNHTS    | 1135  | 1143 | 9              | HLA-A*02:01 | 1135          | 91             | 4.80E-05    | 9.10E+01      | 0.00E+00     | TRUE         |
| 1     | DPLKPTRKS   | 790   | 798  | 9              | HLA-A*02:01 | 790           | 91             | 4.78E-05    | 9.10E+01      | 0.00E+00     | TRUE         |
| 1     | MPVSMAKTS   | 709   | 717  | 9              | HLA-A*02:01 | 709           | 92             | 4.50E-05    | 9.20E+01      | 0.00E+00     | TRUE         |
| 1     | PTNFSISIT   | 697   | 705  | 9              | HLA-A*02:01 | 697           | 92             | 4.43E-05    | 9.20E+01      | 0.00E+00     | TRUE         |
| 1     | LYVYKGYP    | 194   | 202  | 9              | HLA-A*02:01 | 194           | 92             | 4.42E-05    | 9.20E+01      | 0.00E+00     | TRUE         |
| 1     | RYLRHGKLR   | 441   | 449  | 9              | HLA-A*02:01 | 441           | 92             | 4.41E-05    | 9.20E+01      | 0.00E+00     | TRUE         |
| 1     | SWFITQRNF   | 1083  | 1091 | 9              | HLA-A*02:01 | 1083          | 92             | 4.40E-05    | 9.20E+01      | 0.00E+00     | TRUE         |
| 1     | ENQKQIANQ   | 900   | 908  | 9              | HLA-A*02:01 | 900           | 92             | 4.38E-05    | 9.20E+01      | 0.00E+00     | TRUE         |
| 1     | KYFKNHTSP   | 1136  | 1144 | 9              | HLA-A*02:01 | 1136          | 92             | 4.36E-05    | 9.20E+01      | 0.00E+00     | TRUE         |
| 1     | SCGSCCKFD   | 1231  | 1239 | 9              | HLA-A*02:01 | 1231          | 92             | 4.29E-05    | 9.20E+01      | 0.00E+00     | TRUE         |
| 1     | LNCYWPLND   | 472   | 480  | 9              | HLA-A*02:01 | 472           | 92             | 4.23E-05    | 9.20E+01      | 0.00E+00     | TRUE         |
| 1     | PNITNLCPF   | 317   | 325  | 9              | HLA-A*02:01 | 317           | 92             | 4.14E-05    | 9.20E+01      | 0.00E+00     | TRUE         |
| 1     | TSTGNVNYK   | 431   | 439  | 9              | HLA-A*02:01 | 431           | 92             | 4.14E-05    | 9.20E+01      | 0.00E+00     | TRUE         |
| 1     | NTFVSGNCD   | 1101  | 1109 | 9              | HLA-A*02:01 | 1101          | 92             | 4.08E-05    | 9.20E+01      | 0.00E+00     | TRUE         |
| 1     | CNFECDNP    | 128   | 136  | 9              | HLA-A*02:01 | 128           | 92             | 0.00004047  | 9.20E+01      | 0.00E+00     | TRUE         |
| 1     | AYFVGVLKP   | 251   | 259  | 9              | HLA-A*02:01 | 251           | 92             | 4.04E-05    | 9.20E+01      | 0.00E+00     | TRUE         |
| 1     | DFMGCVLAW   | 415   | 423  | 9              | HLA-A*02:01 | 415           | 92             | 3.99E-05    | 9.20E+01      | 0.00E+00     | TRUE         |
| 1     | TYVTQQLIR   | 988   | 996  | 9              | HLA-A*02:01 | 988           | 92             | 3.95E-05    | 9.20E+01      | 0.00E+00     | TRUE         |
| 1     | KPTTFMLKY   | 258   | 266  | 9              | HLA-A*02:01 | 258           | 92             | 3.86E-05    | 9.20E+01      | 0.00E+00     | TRUE         |
| 1     | CHEGKAYFP   | 1064  | 1072 | 9              | HLA-A*02:01 | 1064          | 92             | 3.86E-05    | 9.20E+01      | 0.00E+00     | TRUE         |
| 1     | CNMYICGDS   | 720   | 728  | 9              | HLA-A*02:01 | 720           | 93             | 3.81E-05    | 9.30E+01      | 0.00E+00     | TRUE         |
| 1     | QKQIANQFN   | 902   | 910  | 9              | HLA-A*02:01 | 902           | 93             | 3.78E-05    | 9.30E+01      | 0.00E+00     | TRUE         |
| 1     | IWGTSAAY    | 244   | 252  | 9              | HLA-A*02:01 | 244           | 93             | 3.48E-05    | 9.30E+01      | 0.00E+00     | TRUE         |
| 1     | PPLLTDDMI   | 844   | 852  | 9              | HLA-A*02:01 | 844           | 93             | 3.46E-05    | 9.30E+01      | 0.00E+00     | TRUE         |
| 1     | CDVVIGIIN   | 1108  | 1116 | 9              | HLA-A*02:01 | 1108          | 93             | 3.40E-05    | 9.30E+01      | 0.00E+00     | TRUE         |
| 1     | DPLQPELDS   | 1121  | 1129 | 9              | HLA-A*02:01 | 1121          | 93             | 3.34E-05    | 9.30E+01      | 0.00E+00     | TRUE         |
| 1     | WRIYSTGNN   | 619   | 627  | 9              | HLA-A*02:01 | 619           | 93             | 3.34E-05    | 9.30E+01      | 0.00E+00     | TRUE         |
| 1     | SEKSGNFKH   | 173   | 181  | 9              | HLA-A*02:01 | 173           | 93             | 3.33E-05    | 9.30E+01      | 0.00E+00     | TRUE         |
| 1     | DAGFMKQYG   | 812   | 820  | 9              | HLA-A*02:01 | 812           | 93             | 3.23E-05    | 9.30E+01      | 0.00E+00     | TRUE         |
| 1     | NYNYKYRYL   | 435   | 443  | 9              | HLA-A*02:01 | 435           | 94             | 2.99E-05    | 9.40E+01      | 0.00E+00     | TRUE         |
| 1     | CFSNVVYADS  | 378   | 386  | 9              | HLA-A*02:01 | 378           | 94             | 2.94E-05    | 9.40E+01      | 0.00E+00     | TRUE         |
| 1     | SFEIDKGIY   | 292   | 300  | 9              | HLA-A*02:01 | 292           | 94             | 2.89E-05    | 9.40E+01      | 0.00E+00     | TRUE         |
| 1     | GCVLAWNTR   | 418   | 426  | 9              | HLA-A*02:01 | 418           | 94             | 2.87E-05    | 9.40E+01      | 0.00E+00     | TRUE         |
| 1     | PKLSTDLIK   | 513   | 521  | 9              | HLA-A*02:01 | 513           | 94             | 2.83E-05    | 9.40E+01      | 0.00E+00     | TRUE         |
| 1     | DNPFFAVSK   | 134   | 142  | 9              | HLA-A*02:01 | 134           | 94             | 2.70E-05    | 9.40E+01      | 0.00E+00     | TRUE         |
| 1     | NQCVNFNFN   | 522   | 530  | 9              | HLA-A*02:01 | 522           | 94             | 2.56E-05    | 9.40E+01      | 0.00E+00     | TRUE         |
| 1     | DSSIAYSNN   | 684   | 692  | 9              | HLA-A*02:01 | 684           | 95             | 2.52E-05    | 9.50E+01      | 0.00E+00     | TRUE         |
| 1     | LCCMTSCCS   | 1216  | 1224 | 9              | HLA-A*02:01 | 1216          | 95             | 2.50E-05    | 9.50E+01      | 0.00E+00     | TRUE         |
| 1     | EVFNATKFP   | 327   | 335  | 9              | HLA-A*02:01 | 327           | 95             | 2.48E-05    | 9.50E+01      | 0.00E+00     | TRUE         |
| 1     | MYKTPTLKY   | 770   | 778  | 9              | HLA-A*02:01 | 770           | 95             | 2.44E-05    | 9.50E+01      | 0.00E+00     | TRUE         |
| 1     | VVFVNGTSW   | 1076  | 1084 | 9              | HLA-A*02:01 | 1076          | 95             | 2.41E-05    | 9.50E+01      | 0.00E+00     | TRUE         |
| 1     | DSFVVKGDD   | 385   | 393  | 9              | HLA-A*02:01 | 385           | 95             | 2.39E-05    | 9.50E+01      | 0.00E+00     | TRUE         |
| 1     | HEGKAYFR    | 1065  | 1073 | 9              | HLA-A*02:01 | 1065          | 95             | 2.32E-05    | 9.50E+01      | 0.00E+00     | TRUE         |
| 1     | DATSTGNYN   | 429   | 437  | 9              | HLA-A*02:01 | 429           | 95             | 2.29E-05    | 9.50E+01      | 0.00E+00     | TRUE         |
| 1     | RCTTFDDVQ   | 18    | 26   | 9              | HLA-A*02:01 | 18            | 95             | 2.23E-05    | 9.50E+01      | 0.00E+00     | TRUE         |
| 1     | PWYVWVWLGFI | 1195  | 1203 | 9              | HLA-A*02:01 | 1195          | 95             | 2.20E-05    | 9.50E+01      | 0.00E+00     | TRUE         |
| 1     | QPQQQFGRD   | 546   | 554  | 9              | HLA-A*02:01 | 546           | 95             | 2.17E-05    | 9.50E+01      | 0.00E+00     | TRUE         |
| 1     | GFLYVYVGY   | 192   | 200  | 9              | HLA-A*02:01 | 192           | 95             | 2.07E-05    | 9.50E+01      | 0.00E+00     | TRUE         |
| 1     | MTSCCSCLK   | 1219  | 1227 | 9              | HLA-A*02:01 | 1219          | 96             | 2.01E-05    | 9.60E+01      | 0.00E+00     | TRUE         |
| 1     | EELDKYFKN   | 1132  | 1140 | 9              | HLA-A*02:01 | 1132          | 96             | 1.93E-05    | 9.60E+01      | 0.00E+00     | TRUE         |
| 1     | VRGWVFGST   | 98    | 106  | 9              | HLA-A*02:01 | 98            | 96             | 1.89E-05    | 9.60E+01      | 0.00E+00     | TRUE         |
| 1     | MRGVVYPDE   | 37    | 45   | 9              | HLA-A*02:01 | 37            | 96             | 1.82E-05    | 9.60E+01      | 0.00E+00     | TRUE         |
| 1     | TFSTFKYC    | 359   | 367  | 9              | HLA-A*02:01 | 359           | 96             | 1.80E-05    | 9.60E+01      | 0.00E+00     | TRUE         |
| 1     | EQYIKWPWY   | 1189  | 1197 | 9              | HLA-A*02:01 | 1189          | 96             | 1.79E-05    | 9.60E+01      | 0.00E+00     | TRUE         |
| 1     | KEELDKYFK   | 1131  | 1139 | 9              | HLA-A*02:01 | 1131          | 96             | 1.79E-05    | 9.60E+01      | 0.00E+00     | TRUE         |
| 1     | DNAFNCTFE   | 154   | 162  | 9              | HLA-A*02:01 | 154           | 96             | 1.77E-05    | 9.60E+01      | 0.00E+00     | TRUE         |

| seq # | peptide    | start | end  | peptide length | allele      | peptide index | median binding | mhcnp score | mhcnp percent | legacy score | scores equal |
|-------|------------|-------|------|----------------|-------------|---------------|----------------|-------------|---------------|--------------|--------------|
| 1     | SKRVDFCGK  | 1019  | 1027 | 9              | HLA-A*02:01 | 1019          | 96             | 1.72E-05    | 9.60E+01      | 0.00E+00     | TRUE         |
| 1     | DSFKEELDK  | 1128  | 1136 | 9              | HLA-A*02:01 | 1128          | 96             | 1.69E-05    | 9.60E+01      | 0.00E+00     | TRUE         |
| 1     | LDRCTTFDD  | 16    | 24   | 9              | HLA-A*02:01 | 16            | 96             | 1.69E-05    | 9.60E+01      | 0.00E+00     | TRUE         |
| 1     | QVKQMYKTP  | 766   | 774  | 9              | HLA-A*02:01 | 766           | 96             | 1.65E-05    | 9.60E+01      | 0.00E+00     | TRUE         |
| 1     | PSVYAWERK  | 335   | 343  | 9              | HLA-A*02:01 | 335           | 96             | 1.63E-05    | 9.60E+01      | 0.00E+00     | TRUE         |
| 1     | AYTMSLGAD  | 676   | 684  | 9              | HLA-A*02:01 | 676           | 96             | 1.62E-05    | 9.60E+01      | 0.00E+00     | TRUE         |
| 1     | EGVVFVNGT  | 1074  | 1082 | 9              | HLA-A*02:01 | 1074          | 96             | 1.55E-05    | 9.60E+01      | 0.00E+00     | TRUE         |
| 1     | NCYWPLNDY  | 473   | 481  | 9              | HLA-A*02:01 | 473           | 96             | 1.54E-05    | 9.60E+01      | 0.00E+00     | TRUE         |
| 1     | DYGFYTTTG  | 480   | 488  | 9              | HLA-A*02:01 | 480           | 97             | 1.44E-05    | 9.70E+01      | 0.00E+00     | TRUE         |
| 1     | SPQIITTDN  | 1093  | 1101 | 9              | HLA-A*02:01 | 1093          | 97             | 1.37E-05    | 9.70E+01      | 0.00E+00     | TRUE         |
| 1     | DRLITGRLO  | 976   | 984  | 9              | HLA-A*02:01 | 976           | 97             | 1.36E-05    | 9.70E+01      | 0.00E+00     | TRUE         |
| 1     | NSTFFSTFK  | 357   | 365  | 9              | HLA-A*02:01 | 357           | 97             | 1.32E-05    | 9.70E+01      | 0.00E+00     | TRUE         |
| 1     | WPLNDYGFY  | 476   | 484  | 9              | HLA-A*02:01 | 476           | 97             | 1.30E-05    | 9.70E+01      | 0.00E+00     | TRUE         |
| 1     | TFEYISDAF  | 160   | 168  | 9              | HLA-A*02:01 | 160           | 97             | 1.28E-05    | 9.70E+01      | 0.00E+00     | TRUE         |
| 1     | PTKRSFIED  | 794   | 802  | 9              | HLA-A*02:01 | 794           | 97             | 1.22E-05    | 9.70E+01      | 0.00E+00     | TRUE         |
| 1     | AWRIYSTGN  | 618   | 626  | 9              | HLA-A*02:01 | 618           | 97             | 1.20E-05    | 9.70E+01      | 0.00E+00     | TRUE         |
| 1     | NFELCDNPF  | 129   | 137  | 9              | HLA-A*02:01 | 129           | 97             | 1.19E-05    | 9.70E+01      | 0.00E+00     | TRUE         |
| 1     | LREFVFNK   | 182   | 190  | 9              | HLA-A*02:01 | 182           | 97             | 1.19E-05    | 9.70E+01      | 0.00E+00     | TRUE         |
| 1     | AWERKKISN  | 339   | 347  | 9              | HLA-A*02:01 | 339           | 97             | 1.18E-05    | 9.70E+01      | 0.00E+00     | TRUE         |
| 1     | EFVFNKNDG  | 184   | 192  | 9              | HLA-A*02:01 | 184           | 97             | 1.11E-05    | 9.70E+01      | 0.00E+00     | TRUE         |
| 1     | TGNYNYKYR  | 433   | 441  | 9              | HLA-A*02:01 | 433           | 97             | 1.11E-05    | 9.70E+01      | 0.00E+00     | TRUE         |
| 1     | VYKGYPID   | 196   | 204  | 9              | HLA-A*02:01 | 196           | 97             | 1.08E-05    | 97            | 0            | TRUE         |
| 1     | GWVFGSTMN  | 100   | 108  | 9              | HLA-A*02:01 | 100           | 97             | 1.02E-05    | 97            | 0            | TRUE         |
| 1     | DCNMYICGD  | 719   | 727  | 9              | HLA-A*02:01 | 719           | 97             | 9.92E-06    | 97            | 0            | TRUE         |
| 1     | DFTDSVRDP  | 557   | 565  | 9              | HLA-A*02:01 | 557           | 97             | 9.74E-06    | 97            | 0            | TRUE         |
| 1     | PDEIFRSDT  | 43    | 51   | 9              | HLA-A*02:01 | 43            | 97             | 9.71E-06    | 97            | 0            | TRUE         |
| 1     | DPKTSEILD  | 564   | 572  | 9              | HLA-A*02:01 | 564           | 98             | 8.80E-06    | 98            | 0            | TRUE         |
| 1     | TREVFAQVK  | 760   | 768  | 9              | HLA-A*02:01 | 760           | 98             | 8.56E-06    | 98            | 0            | TRUE         |
| 1     | DYNYKLPPD  | 407   | 415  | 9              | HLA-A*02:01 | 407           | 98             | 8.20E-06    | 98            | 0            | TRUE         |
| 1     | NCTFEYISD  | 158   | 166  | 9              | HLA-A*02:01 | 158           | 98             | 7.94E-06    | 98            | 0            | TRUE         |
| 1     | CCKFDEDD   | 1235  | 1243 | 9              | HLA-A*02:01 | 1235          | 98             | 7.39E-06    | 98            | 0            | TRUE         |
| 1     | SECVLGQSK  | 1012  | 1020 | 9              | HLA-A*02:01 | 1012          | 98             | 7.03E-06    | 98            | 0            | TRUE         |
| 1     | EKSNNVVRGW | 93    | 101  | 9              | HLA-A*02:01 | 93            | 98             | 6.82E-06    | 98            | 0            | TRUE         |
| 1     | WPWYVWLGF  | 1194  | 1202 | 9              | HLA-A*02:01 | 1194          | 98             | 6.80E-06    | 98            | 0            | TRUE         |
| 1     | KYEQYIKWP  | 1187  | 1195 | 9              | HLA-A*02:01 | 1187          | 98             | 6.55E-06    | 98            | 0            | TRUE         |
| 1     | DRCTTFDDV  | 17    | 25   | 9              | HLA-A*02:01 | 17            | 99             | 6.17E-06    | 99            | 0            | TRUE         |
| 1     | ECVLGQSKR  | 1013  | 1021 | 9              | HLA-A*02:01 | 1013          | 99             | 6.07E-06    | 99            | 0            | TRUE         |
| 1     | ERKKISNCV  | 341   | 349  | 9              | HLA-A*02:01 | 341           | 99             | 5.54E-06    | 99            | 0            | TRUE         |
| 1     | DTSYECDDP  | 643   | 651  | 9              | HLA-A*02:01 | 643           | 99             | 5.06E-06    | 99            | 0            | TRUE         |
| 1     | PTTFMLKYD  | 259   | 267  | 9              | HLA-A*02:01 | 259           | 99             | 4.88E-06    | 99            | 0            | TRUE         |
| 1     | DKGIYQTSN  | 296   | 304  | 9              | HLA-A*02:01 | 296           | 99             | 3.87E-06    | 99            | 0            | TRUE         |
| 1     | KYRYLRHGK  | 439   | 447  | 9              | HLA-A*02:01 | 439           | 100            | 2.11E-06    | 100           | 0            | TRUE         |
| 1     | PREGVFVFN  | 1072  | 1080 | 9              | HLA-A*02:01 | 1072          | 100            | 1.51E-06    | 100           | 0            | TRUE         |
| 1     | PPALNCYWP  | 469   | 477  | 9              | HLA-A*02:01 | 469           | 100            | 1.44E-06    | 100           | 0            | TRUE         |
| 1     | PYRVVVLFS  | 493   | 501  | 9              | HLA-A*02:01 | 493           | 100            | 1.44E-06    | 100           | 0            | TRUE         |
| 1     | DYSVLYNST  | 351   | 359  | 9              | HLA-A*02:01 | 351           | 100            | 1.26E-06    | 100           | 0            | TRUE         |
| 1     | NYKYRYLRH  | 437   | 445  | 9              | HLA-A*02:01 | 437           | 100            | 1.37E-07    | 100           | 0            | TRUE         |

| seq # | peptide   | start | end | peptide length | allele      | peptide index | immunogenicity | legacy score | scores equal |
|-------|-----------|-------|-----|----------------|-------------|---------------|----------------|--------------|--------------|
| 1     | FIAGLIAIV | 1     | 9   | 9              | HLA-A*02:01 | 1             | 0.27206        | 0.27206      | TRUE         |
| 4     | KAVYNFATC | 1     | 9   | 9              | HLA-A*02:01 | 4             | 0.16928        | 0.16928      | TRUE         |
| 3     | RLNEVAKNL | 1     | 9   | 9              | HLA-A*02:01 | 3             | -0.0101        | -0.0101      | TRUE         |
| 2     | LITGRLQSL | 1     | 9   | 9              | HLA-A*02:01 | 2             | -0.10776       | -0.10776     | TRUE         |
| 5     | FQPQNGQFI | 1     | 9   | 9              | HLA-A*02:01 | 5             | -0.12392       | -0.12392     | TRUE         |







[illegible]

[illegible]

[illegible]

[illegible]

| seq # | position | amino acid | NetChop Predic | legacy score | scores equal |
|-------|----------|------------|----------------|--------------|--------------|
| 1     | 1        | M          | 0.298279       | 0.298279     | TRUE         |
| 1     | 2        | F          | 0.330884       | 0.330884     | TRUE         |
| 1     | 3        | I          | 0.114689       | 0.114689     | TRUE         |
| 1     | 4        | F          | 0.442811       | 0.442811     | TRUE         |
| 1     | 5        | L          | 0.410182       | 0.410182     | TRUE         |
| 1     | 6        | L          | 0.931958       | 0.931958     | TRUE         |
| 1     | 7        | F          | 0.621056       | 0.621056     | TRUE         |
| 1     | 8        | L          | 0.972544       | 0.972544     | TRUE         |
| 1     | 9        | T          | 0.041485       | 0.041485     | TRUE         |
| 1     | 10       | L          | 0.97615        | 0.97615      | TRUE         |
| 1     | 11       | T          | 0.241841       | 0.241841     | TRUE         |
| 1     | 12       | S          | 0.457062       | 0.457062     | TRUE         |
| 1     | 13       | G          | 0.422642       | 0.422642     | TRUE         |
| 1     | 14       | S          | 0.046707       | 0.046707     | TRUE         |
| 1     | 15       | D          | 0.036781       | 0.036781     | TRUE         |
| 1     | 16       | L          | 0.879275       | 0.879275     | TRUE         |
| 1     | 17       | D          | 0.126103       | 0.126103     | TRUE         |
| 1     | 18       | R          | 0.71261        | 0.71261      | TRUE         |
| 1     | 19       | C          | 0.02337        | 0.02337      | TRUE         |
| 1     | 20       | T          | 0.043221       | 0.043221     | TRUE         |
| 1     | 21       | T          | 0.086554       | 0.086554     | TRUE         |
| 1     | 22       | F          | 0.930575       | 0.930575     | TRUE         |
| 1     | 23       | D          | 0.04825        | 0.04825      | TRUE         |
| 1     | 24       | D          | 0.028366       | 0.028366     | TRUE         |
| 1     | 25       | V          | 0.590699       | 0.590699     | TRUE         |
| 1     | 26       | Q          | 0.027362       | 0.027362     | TRUE         |
| 1     | 27       | A          | 0.169519       | 0.169519     | TRUE         |
| 1     | 28       | P          | 0.140523       | 0.140523     | TRUE         |
| 1     | 29       | N          | 0.123554       | 0.123554     | TRUE         |
| 1     | 30       | Y          | 0.694831       | 0.694831     | TRUE         |
| 1     | 31       | T          | 0.050037       | 0.050037     | TRUE         |
| 1     | 32       | Q          | 0.614091       | 0.614091     | TRUE         |
| 1     | 33       | H          | 0.418012       | 0.418012     | TRUE         |
| 1     | 34       | T          | 0.155867       | 0.155867     | TRUE         |
| 1     | 35       | S          | 0.265637       | 0.265637     | TRUE         |
| 1     | 36       | S          | 0.048827       | 0.048827     | TRUE         |
| 1     | 37       | M          | 0.940259       | 0.940259     | TRUE         |
| 1     | 38       | R          | 0.241518       | 0.241518     | TRUE         |
| 1     | 39       | G          | 0.047992       | 0.047992     | TRUE         |
| 1     | 40       | V          | 0.109214       | 0.109214     | TRUE         |
| 1     | 41       | Y          | 0.57864        | 0.57864      | TRUE         |
| 1     | 42       | Y          | 0.247408       | 0.247408     | TRUE         |
| 1     | 43       | P          | 0.03909        | 0.03909      | TRUE         |
| 1     | 44       | D          | 0.120699       | 0.120699     | TRUE         |

| seq # | position | amino acid | NetChop Predic | legacy score | scores equal |
|-------|----------|------------|----------------|--------------|--------------|
| 1     | 45       | E          | 0.039457       | 0.039457     | TRUE         |
| 1     | 46       | I          | 0.240977       | 0.240977     | TRUE         |
| 1     | 47       | F          | 0.59066        | 0.59066      | TRUE         |
| 1     | 48       | R          | 0.401686       | 0.401686     | TRUE         |
| 1     | 49       | S          | 0.205822       | 0.205822     | TRUE         |
| 1     | 50       | D          | 0.327179       | 0.327179     | TRUE         |
| 1     | 51       | T          | 0.024547       | 0.024547     | TRUE         |
| 1     | 52       | L          | 0.954987       | 0.954987     | TRUE         |
| 1     | 53       | Y          | 0.961645       | 0.961645     | TRUE         |
| 1     | 54       | L          | 0.90775        | 0.90775      | TRUE         |
| 1     | 55       | T          | 0.122765       | 0.122765     | TRUE         |
| 1     | 56       | Q          | 0.212951       | 0.212951     | TRUE         |
| 1     | 57       | D          | 0.055997       | 0.055997     | TRUE         |
| 1     | 58       | L          | 0.730354       | 0.730354     | TRUE         |
| 1     | 59       | F          | 0.195046       | 0.195046     | TRUE         |
| 1     | 60       | L          | 0.536814       | 0.536814     | TRUE         |
| 1     | 61       | P          | 0.043812       | 0.043812     | TRUE         |
| 1     | 62       | F          | 0.610865       | 0.610865     | TRUE         |
| 1     | 63       | Y          | 0.812533       | 0.812533     | TRUE         |
| 1     | 64       | S          | 0.035535       | 0.035535     | TRUE         |
| 1     | 65       | N          | 0.188157       | 0.188157     | TRUE         |
| 1     | 66       | V          | 0.64158        | 0.64158      | TRUE         |
| 1     | 67       | T          | 0.292719       | 0.292719     | TRUE         |
| 1     | 68       | G          | 0.306453       | 0.306453     | TRUE         |
| 1     | 69       | F          | 0.458486       | 0.458486     | TRUE         |
| 1     | 70       | H          | 0.241619       | 0.241619     | TRUE         |
| 1     | 71       | T          | 0.03629        | 0.03629      | TRUE         |
| 1     | 72       | I          | 0.955396       | 0.955396     | TRUE         |
| 1     | 73       | N          | 0.222865       | 0.222865     | TRUE         |
| 1     | 74       | H          | 0.075778       | 0.075778     | TRUE         |
| 1     | 75       | T          | 0.132782       | 0.132782     | TRUE         |
| 1     | 76       | F          | 0.952139       | 0.952139     | TRUE         |
| 1     | 77       | G          | 0.028787       | 0.028787     | TRUE         |
| 1     | 78       | N          | 0.024169       | 0.024169     | TRUE         |
| 1     | 79       | P          | 0.028202       | 0.028202     | TRUE         |
| 1     | 80       | V          | 0.366345       | 0.366345     | TRUE         |
| 1     | 81       | I          | 0.557503       | 0.557503     | TRUE         |
| 1     | 82       | P          | 0.060982       | 0.060982     | TRUE         |
| 1     | 83       | F          | 0.444012       | 0.444012     | TRUE         |
| 1     | 84       | K          | 0.228498       | 0.228498     | TRUE         |
| 1     | 85       | D          | 0.02951        | 0.02951      | TRUE         |
| 1     | 86       | G          | 0.046407       | 0.046407     | TRUE         |
| 1     | 87       | I          | 0.266909       | 0.266909     | TRUE         |
| 1     | 88       | Y          | 0.897143       | 0.897143     | TRUE         |

| seq # | position | amino acid | NetChop Predic | legacy score | scores equal |
|-------|----------|------------|----------------|--------------|--------------|
| 1     | 89       | F          | 0.974964       | 0.974964     | TRUE         |
| 1     | 90       | A          | 0.688128       | 0.688128     | TRUE         |
| 1     | 91       | A          | 0.214246       | 0.214246     | TRUE         |
| 1     | 92       | T          | 0.045014       | 0.045014     | TRUE         |
| 1     | 93       | E          | 0.02331        | 0.02331      | TRUE         |
| 1     | 94       | K          | 0.898666       | 0.898666     | TRUE         |
| 1     | 95       | S          | 0.056475       | 0.056475     | TRUE         |
| 1     | 96       | N          | 0.022442       | 0.022442     | TRUE         |
| 1     | 97       | V          | 0.084067       | 0.084067     | TRUE         |
| 1     | 98       | V          | 0.934328       | 0.934328     | TRUE         |
| 1     | 99       | R          | 0.155471       | 0.155471     | TRUE         |
| 1     | 100      | G          | 0.039359       | 0.039359     | TRUE         |
| 1     | 101      | W          | 0.439895       | 0.439895     | TRUE         |
| 1     | 102      | V          | 0.111968       | 0.111968     | TRUE         |
| 1     | 103      | F          | 0.526021       | 0.526021     | TRUE         |
| 1     | 104      | G          | 0.026782       | 0.026782     | TRUE         |
| 1     | 105      | S          | 0.053796       | 0.053796     | TRUE         |
| 1     | 106      | T          | 0.18755        | 0.18755      | TRUE         |
| 1     | 107      | M          | 0.960354       | 0.960354     | TRUE         |
| 1     | 108      | N          | 0.120122       | 0.120122     | TRUE         |
| 1     | 109      | N          | 0.044832       | 0.044832     | TRUE         |
| 1     | 110      | K          | 0.159299       | 0.159299     | TRUE         |
| 1     | 111      | S          | 0.026398       | 0.026398     | TRUE         |
| 1     | 112      | Q          | 0.02401        | 0.02401      | TRUE         |
| 1     | 113      | S          | 0.023503       | 0.023503     | TRUE         |
| 1     | 114      | V          | 0.627336       | 0.627336     | TRUE         |
| 1     | 115      | I          | 0.073603       | 0.073603     | TRUE         |
| 1     | 116      | I          | 0.091071       | 0.091071     | TRUE         |
| 1     | 117      | I          | 0.229186       | 0.229186     | TRUE         |
| 1     | 118      | N          | 0.028382       | 0.028382     | TRUE         |
| 1     | 119      | N          | 0.029111       | 0.029111     | TRUE         |
| 1     | 120      | S          | 0.026213       | 0.026213     | TRUE         |
| 1     | 121      | T          | 0.065161       | 0.065161     | TRUE         |
| 1     | 122      | N          | 0.023567       | 0.023567     | TRUE         |
| 1     | 123      | V          | 0.509248       | 0.509248     | TRUE         |
| 1     | 124      | V          | 0.833598       | 0.833598     | TRUE         |
| 1     | 125      | I          | 0.529456       | 0.529456     | TRUE         |
| 1     | 126      | R          | 0.228765       | 0.228765     | TRUE         |
| 1     | 127      | A          | 0.715995       | 0.715995     | TRUE         |
| 1     | 128      | C          | 0.05255        | 0.05255      | TRUE         |
| 1     | 129      | N          | 0.02768        | 0.02768      | TRUE         |
| 1     | 130      | F          | 0.895396       | 0.895396     | TRUE         |
| 1     | 131      | E          | 0.025198       | 0.025198     | TRUE         |
| 1     | 132      | L          | 0.817254       | 0.817254     | TRUE         |

| seq # | position | amino acid | NetChop Predic | legacy score | scores equal |
|-------|----------|------------|----------------|--------------|--------------|
| 1     | 133      | C          | 0.027073       | 0.027073     | TRUE         |
| 1     | 134      | D          | 0.022693       | 0.022693     | TRUE         |
| 1     | 135      | N          | 0.022771       | 0.022771     | TRUE         |
| 1     | 136      | P          | 0.02369        | 0.02369      | TRUE         |
| 1     | 137      | F          | 0.308533       | 0.308533     | TRUE         |
| 1     | 138      | F          | 0.509872       | 0.509872     | TRUE         |
| 1     | 139      | A          | 0.247508       | 0.247508     | TRUE         |
| 1     | 140      | V          | 0.849922       | 0.849922     | TRUE         |
| 1     | 141      | S          | 0.051815       | 0.051815     | TRUE         |
| 1     | 142      | K          | 0.675559       | 0.675559     | TRUE         |
| 1     | 143      | P          | 0.697041       | 0.697041     | TRUE         |
| 1     | 144      | M          | 0.751781       | 0.751781     | TRUE         |
| 1     | 145      | G          | 0.022949       | 0.022949     | TRUE         |
| 1     | 146      | T          | 0.02961        | 0.02961      | TRUE         |
| 1     | 147      | Q          | 0.136275       | 0.136275     | TRUE         |
| 1     | 148      | T          | 0.034222       | 0.034222     | TRUE         |
| 1     | 149      | H          | 0.059441       | 0.059441     | TRUE         |
| 1     | 150      | T          | 0.519607       | 0.519607     | TRUE         |
| 1     | 151      | M          | 0.855392       | 0.855392     | TRUE         |
| 1     | 152      | I          | 0.312052       | 0.312052     | TRUE         |
| 1     | 153      | F          | 0.552876       | 0.552876     | TRUE         |
| 1     | 154      | D          | 0.02296        | 0.02296      | TRUE         |
| 1     | 155      | N          | 0.027825       | 0.027825     | TRUE         |
| 1     | 156      | A          | 0.080007       | 0.080007     | TRUE         |
| 1     | 157      | F          | 0.669097       | 0.669097     | TRUE         |
| 1     | 158      | N          | 0.024506       | 0.024506     | TRUE         |
| 1     | 159      | C          | 0.060218       | 0.060218     | TRUE         |
| 1     | 160      | T          | 0.051831       | 0.051831     | TRUE         |
| 1     | 161      | F          | 0.714746       | 0.714746     | TRUE         |
| 1     | 162      | E          | 0.025004       | 0.025004     | TRUE         |
| 1     | 163      | Y          | 0.950771       | 0.950771     | TRUE         |
| 1     | 164      | I          | 0.277502       | 0.277502     | TRUE         |
| 1     | 165      | S          | 0.024333       | 0.024333     | TRUE         |
| 1     | 166      | D          | 0.033505       | 0.033505     | TRUE         |
| 1     | 167      | A          | 0.680183       | 0.680183     | TRUE         |
| 1     | 168      | F          | 0.424088       | 0.424088     | TRUE         |
| 1     | 169      | S          | 0.02449        | 0.02449      | TRUE         |
| 1     | 170      | L          | 0.973902       | 0.973902     | TRUE         |
| 1     | 171      | D          | 0.067756       | 0.067756     | TRUE         |
| 1     | 172      | V          | 0.9316         | 0.9316       | TRUE         |
| 1     | 173      | S          | 0.027624       | 0.027624     | TRUE         |
| 1     | 174      | E          | 0.03023        | 0.03023      | TRUE         |
| 1     | 175      | K          | 0.902816       | 0.902816     | TRUE         |
| 1     | 176      | S          | 0.044918       | 0.044918     | TRUE         |

| seq # | position | amino acid | NetChop Predict | legacy score | scores equal |
|-------|----------|------------|-----------------|--------------|--------------|
| 1     | 177      | G          | 0.116457        | 0.116457     | TRUE         |
| 1     | 178      | N          | 0.025271        | 0.025271     | TRUE         |
| 1     | 179      | F          | 0.669527        | 0.669527     | TRUE         |
| 1     | 180      | K          | 0.15922         | 0.15922      | TRUE         |
| 1     | 181      | H          | 0.250362        | 0.250362     | TRUE         |
| 1     | 182      | L          | 0.850045        | 0.850045     | TRUE         |
| 1     | 183      | R          | 0.221547        | 0.221547     | TRUE         |
| 1     | 184      | E          | 0.029922        | 0.029922     | TRUE         |
| 1     | 185      | F          | 0.376835        | 0.376835     | TRUE         |
| 1     | 186      | V          | 0.094246        | 0.094246     | TRUE         |
| 1     | 187      | F          | 0.550837        | 0.550837     | TRUE         |
| 1     | 188      | K          | 0.711411        | 0.711411     | TRUE         |
| 1     | 189      | N          | 0.066849        | 0.066849     | TRUE         |
| 1     | 190      | K          | 0.5457          | 0.5457       | TRUE         |
| 1     | 191      | D          | 0.037645        | 0.037645     | TRUE         |
| 1     | 192      | G          | 0.023651        | 0.023651     | TRUE         |
| 1     | 193      | F          | 0.098569        | 0.098569     | TRUE         |
| 1     | 194      | L          | 0.441503        | 0.441503     | TRUE         |
| 1     | 195      | Y          | 0.530218        | 0.530218     | TRUE         |
| 1     | 196      | V          | 0.918859        | 0.918859     | TRUE         |
| 1     | 197      | Y          | 0.976524        | 0.976524     | TRUE         |
| 1     | 198      | K          | 0.56138         | 0.56138      | TRUE         |
| 1     | 199      | G          | 0.111051        | 0.111051     | TRUE         |
| 1     | 200      | Y          | 0.28048         | 0.28048      | TRUE         |
| 1     | 201      | Q          | 0.030039        | 0.030039     | TRUE         |
| 1     | 202      | P          | 0.028102        | 0.028102     | TRUE         |
| 1     | 203      | I          | 0.948151        | 0.948151     | TRUE         |
| 1     | 204      | D          | 0.058137        | 0.058137     | TRUE         |
| 1     | 205      | V          | 0.573075        | 0.573075     | TRUE         |
| 1     | 206      | V          | 0.663401        | 0.663401     | TRUE         |
| 1     | 207      | R          | 0.952684        | 0.952684     | TRUE         |
| 1     | 208      | D          | 0.043886        | 0.043886     | TRUE         |
| 1     | 209      | L          | 0.928221        | 0.928221     | TRUE         |
| 1     | 210      | P          | 0.026053        | 0.026053     | TRUE         |
| 1     | 211      | S          | 0.03213         | 0.03213      | TRUE         |
| 1     | 212      | G          | 0.050678        | 0.050678     | TRUE         |
| 1     | 213      | F          | 0.570902        | 0.570902     | TRUE         |
| 1     | 214      | N          | 0.064953        | 0.064953     | TRUE         |
| 1     | 215      | T          | 0.04171         | 0.04171      | TRUE         |
| 1     | 216      | L          | 0.975396        | 0.975396     | TRUE         |
| 1     | 217      | K          | 0.952359        | 0.952359     | TRUE         |
| 1     | 218      | P          | 0.122798        | 0.122798     | TRUE         |
| 1     | 219      | I          | 0.541863        | 0.541863     | TRUE         |
| 1     | 220      | F          | 0.603907        | 0.603907     | TRUE         |

| seq # | position | amino acid | NetChop Predic | legacy score | scores equal |
|-------|----------|------------|----------------|--------------|--------------|
| 1     | 221      | K          | 0.09149        | 0.09149      | TRUE         |
| 1     | 222      | L          | 0.943169       | 0.943169     | TRUE         |
| 1     | 223      | P          | 0.03772        | 0.03772      | TRUE         |
| 1     | 224      | L          | 0.468708       | 0.468708     | TRUE         |
| 1     | 225      | G          | 0.030692       | 0.030692     | TRUE         |
| 1     | 226      | I          | 0.363069       | 0.363069     | TRUE         |
| 1     | 227      | N          | 0.025305       | 0.025305     | TRUE         |
| 1     | 228      | I          | 0.069297       | 0.069297     | TRUE         |
| 1     | 229      | T          | 0.526435       | 0.526435     | TRUE         |
| 1     | 230      | N          | 0.179957       | 0.179957     | TRUE         |
| 1     | 231      | F          | 0.812431       | 0.812431     | TRUE         |
| 1     | 232      | R          | 0.233772       | 0.233772     | TRUE         |
| 1     | 233      | A          | 0.554724       | 0.554724     | TRUE         |
| 1     | 234      | I          | 0.113207       | 0.113207     | TRUE         |
| 1     | 235      | L          | 0.880313       | 0.880313     | TRUE         |
| 1     | 236      | T          | 0.123577       | 0.123577     | TRUE         |
| 1     | 237      | A          | 0.470811       | 0.470811     | TRUE         |
| 1     | 238      | F          | 0.858928       | 0.858928     | TRUE         |
| 1     | 239      | S          | 0.027377       | 0.027377     | TRUE         |
| 1     | 240      | P          | 0.045365       | 0.045365     | TRUE         |
| 1     | 241      | A          | 0.196678       | 0.196678     | TRUE         |
| 1     | 242      | Q          | 0.358339       | 0.358339     | TRUE         |
| 1     | 243      | D          | 0.024171       | 0.024171     | TRUE         |
| 1     | 244      | I          | 0.529729       | 0.529729     | TRUE         |
| 1     | 245      | W          | 0.560925       | 0.560925     | TRUE         |
| 1     | 246      | G          | 0.023412       | 0.023412     | TRUE         |
| 1     | 247      | T          | 0.139366       | 0.139366     | TRUE         |
| 1     | 248      | S          | 0.062018       | 0.062018     | TRUE         |
| 1     | 249      | A          | 0.364143       | 0.364143     | TRUE         |
| 1     | 250      | A          | 0.058284       | 0.058284     | TRUE         |
| 1     | 251      | A          | 0.792759       | 0.792759     | TRUE         |
| 1     | 252      | Y          | 0.500223       | 0.500223     | TRUE         |
| 1     | 253      | F          | 0.258039       | 0.258039     | TRUE         |
| 1     | 254      | V          | 0.234938       | 0.234938     | TRUE         |
| 1     | 255      | G          | 0.03359        | 0.03359      | TRUE         |
| 1     | 256      | Y          | 0.92326        | 0.92326      | TRUE         |
| 1     | 257      | L          | 0.506742       | 0.506742     | TRUE         |
| 1     | 258      | K          | 0.566436       | 0.566436     | TRUE         |
| 1     | 259      | P          | 0.0702         | 0.0702       | TRUE         |
| 1     | 260      | T          | 0.036152       | 0.036152     | TRUE         |
| 1     | 261      | T          | 0.025607       | 0.025607     | TRUE         |
| 1     | 262      | F          | 0.957999       | 0.957999     | TRUE         |
| 1     | 263      | M          | 0.959639       | 0.959639     | TRUE         |
| 1     | 264      | L          | 0.978806       | 0.978806     | TRUE         |

| seq # | position | amino acid | NetChop Predict | legacy score | scores equal |
|-------|----------|------------|-----------------|--------------|--------------|
| 1     | 265      | K          | 0.705928        | 0.705928     | TRUE         |
| 1     | 266      | Y          | 0.974316        | 0.974316     | TRUE         |
| 1     | 267      | D          | 0.028749        | 0.028749     | TRUE         |
| 1     | 268      | E          | 0.023337        | 0.023337     | TRUE         |
| 1     | 269      | N          | 0.023189        | 0.023189     | TRUE         |
| 1     | 270      | G          | 0.027052        | 0.027052     | TRUE         |
| 1     | 271      | T          | 0.027602        | 0.027602     | TRUE         |
| 1     | 272      | I          | 0.521234        | 0.521234     | TRUE         |
| 1     | 273      | T          | 0.515176        | 0.515176     | TRUE         |
| 1     | 274      | D          | 0.294219        | 0.294219     | TRUE         |
| 1     | 275      | A          | 0.807139        | 0.807139     | TRUE         |
| 1     | 276      | V          | 0.76772         | 0.76772      | TRUE         |
| 1     | 277      | D          | 0.031619        | 0.031619     | TRUE         |
| 1     | 278      | C          | 0.030834        | 0.030834     | TRUE         |
| 1     | 279      | S          | 0.034977        | 0.034977     | TRUE         |
| 1     | 280      | Q          | 0.047626        | 0.047626     | TRUE         |
| 1     | 281      | N          | 0.027426        | 0.027426     | TRUE         |
| 1     | 282      | P          | 0.036112        | 0.036112     | TRUE         |
| 1     | 283      | L          | 0.94996         | 0.94996      | TRUE         |
| 1     | 284      | A          | 0.077707        | 0.077707     | TRUE         |
| 1     | 285      | E          | 0.025825        | 0.025825     | TRUE         |
| 1     | 286      | L          | 0.955093        | 0.955093     | TRUE         |
| 1     | 287      | K          | 0.597372        | 0.597372     | TRUE         |
| 1     | 288      | C          | 0.02746         | 0.02746      | TRUE         |
| 1     | 289      | S          | 0.030354        | 0.030354     | TRUE         |
| 1     | 290      | V          | 0.80365         | 0.80365      | TRUE         |
| 1     | 291      | K          | 0.871101        | 0.871101     | TRUE         |
| 1     | 292      | S          | 0.032877        | 0.032877     | TRUE         |
| 1     | 293      | F          | 0.929975        | 0.929975     | TRUE         |
| 1     | 294      | E          | 0.022638        | 0.022638     | TRUE         |
| 1     | 295      | I          | 0.324161        | 0.324161     | TRUE         |
| 1     | 296      | D          | 0.024696        | 0.024696     | TRUE         |
| 1     | 297      | K          | 0.695444        | 0.695444     | TRUE         |
| 1     | 298      | G          | 0.023966        | 0.023966     | TRUE         |
| 1     | 299      | I          | 0.485693        | 0.485693     | TRUE         |
| 1     | 300      | Y          | 0.813724        | 0.813724     | TRUE         |
| 1     | 301      | Q          | 0.041192        | 0.041192     | TRUE         |
| 1     | 302      | T          | 0.276841        | 0.276841     | TRUE         |
| 1     | 303      | S          | 0.08906         | 0.08906      | TRUE         |
| 1     | 304      | N          | 0.060892        | 0.060892     | TRUE         |
| 1     | 305      | F          | 0.517332        | 0.517332     | TRUE         |
| 1     | 306      | R          | 0.526027        | 0.526027     | TRUE         |
| 1     | 307      | V          | 0.858292        | 0.858292     | TRUE         |
| 1     | 308      | V          | 0.135357        | 0.135357     | TRUE         |

| seq # | position | amino acid | NetChop Predic | legacy score | scores equal |
|-------|----------|------------|----------------|--------------|--------------|
| 1     | 309      | P          | 0.073471       | 0.073471     | TRUE         |
| 1     | 310      | S          | 0.029979       | 0.029979     | TRUE         |
| 1     | 311      | G          | 0.095444       | 0.095444     | TRUE         |
| 1     | 312      | D          | 0.023383       | 0.023383     | TRUE         |
| 1     | 313      | V          | 0.83755        | 0.83755      | TRUE         |
| 1     | 314      | V          | 0.626508       | 0.626508     | TRUE         |
| 1     | 315      | R          | 0.200367       | 0.200367     | TRUE         |
| 1     | 316      | F          | 0.927429       | 0.927429     | TRUE         |
| 1     | 317      | P          | 0.025395       | 0.025395     | TRUE         |
| 1     | 318      | N          | 0.033767       | 0.033767     | TRUE         |
| 1     | 319      | I          | 0.255958       | 0.255958     | TRUE         |
| 1     | 320      | T          | 0.403684       | 0.403684     | TRUE         |
| 1     | 321      | N          | 0.06777        | 0.06777      | TRUE         |
| 1     | 322      | L          | 0.976336       | 0.976336     | TRUE         |
| 1     | 323      | C          | 0.043462       | 0.043462     | TRUE         |
| 1     | 324      | P          | 0.045318       | 0.045318     | TRUE         |
| 1     | 325      | F          | 0.161583       | 0.161583     | TRUE         |
| 1     | 326      | G          | 0.024743       | 0.024743     | TRUE         |
| 1     | 327      | E          | 0.022608       | 0.022608     | TRUE         |
| 1     | 328      | V          | 0.690091       | 0.690091     | TRUE         |
| 1     | 329      | F          | 0.914123       | 0.914123     | TRUE         |
| 1     | 330      | N          | 0.028159       | 0.028159     | TRUE         |
| 1     | 331      | A          | 0.461187       | 0.461187     | TRUE         |
| 1     | 332      | T          | 0.05843        | 0.05843      | TRUE         |
| 1     | 333      | K          | 0.352542       | 0.352542     | TRUE         |
| 1     | 334      | F          | 0.622537       | 0.622537     | TRUE         |
| 1     | 335      | P          | 0.025711       | 0.025711     | TRUE         |
| 1     | 336      | S          | 0.023055       | 0.023055     | TRUE         |
| 1     | 337      | V          | 0.526172       | 0.526172     | TRUE         |
| 1     | 338      | Y          | 0.95409        | 0.95409      | TRUE         |
| 1     | 339      | A          | 0.718438       | 0.718438     | TRUE         |
| 1     | 340      | W          | 0.970353       | 0.970353     | TRUE         |
| 1     | 341      | E          | 0.023981       | 0.023981     | TRUE         |
| 1     | 342      | R          | 0.68481        | 0.68481      | TRUE         |
| 1     | 343      | K          | 0.171851       | 0.171851     | TRUE         |
| 1     | 344      | K          | 0.432424       | 0.432424     | TRUE         |
| 1     | 345      | I          | 0.359387       | 0.359387     | TRUE         |
| 1     | 346      | S          | 0.050129       | 0.050129     | TRUE         |
| 1     | 347      | N          | 0.02714        | 0.02714      | TRUE         |
| 1     | 348      | C          | 0.02406        | 0.02406      | TRUE         |
| 1     | 349      | V          | 0.88767        | 0.88767      | TRUE         |
| 1     | 350      | A          | 0.085746       | 0.085746     | TRUE         |
| 1     | 351      | D          | 0.027013       | 0.027013     | TRUE         |
| 1     | 352      | Y          | 0.903522       | 0.903522     | TRUE         |

| seq # | position | amino acid | NetChop Predict | legacy score | scores equal |
|-------|----------|------------|-----------------|--------------|--------------|
| 1     | 353      | S          | 0.023063        | 0.023063     | TRUE         |
| 1     | 354      | V          | 0.18937         | 0.18937      | TRUE         |
| 1     | 355      | L          | 0.227026        | 0.227026     | TRUE         |
| 1     | 356      | Y          | 0.972184        | 0.972184     | TRUE         |
| 1     | 357      | N          | 0.024368        | 0.024368     | TRUE         |
| 1     | 358      | S          | 0.029946        | 0.029946     | TRUE         |
| 1     | 359      | T          | 0.100809        | 0.100809     | TRUE         |
| 1     | 360      | F          | 0.877285        | 0.877285     | TRUE         |
| 1     | 361      | F          | 0.722699        | 0.722699     | TRUE         |
| 1     | 362      | S          | 0.063057        | 0.063057     | TRUE         |
| 1     | 363      | T          | 0.17051         | 0.17051      | TRUE         |
| 1     | 364      | F          | 0.957783        | 0.957783     | TRUE         |
| 1     | 365      | K          | 0.741123        | 0.741123     | TRUE         |
| 1     | 366      | C          | 0.079893        | 0.079893     | TRUE         |
| 1     | 367      | Y          | 0.915784        | 0.915784     | TRUE         |
| 1     | 368      | G          | 0.027617        | 0.027617     | TRUE         |
| 1     | 369      | V          | 0.832312        | 0.832312     | TRUE         |
| 1     | 370      | S          | 0.045343        | 0.045343     | TRUE         |
| 1     | 371      | A          | 0.118323        | 0.118323     | TRUE         |
| 1     | 372      | T          | 0.027034        | 0.027034     | TRUE         |
| 1     | 373      | K          | 0.900998        | 0.900998     | TRUE         |
| 1     | 374      | L          | 0.864084        | 0.864084     | TRUE         |
| 1     | 375      | N          | 0.029447        | 0.029447     | TRUE         |
| 1     | 376      | D          | 0.027773        | 0.027773     | TRUE         |
| 1     | 377      | L          | 0.781806        | 0.781806     | TRUE         |
| 1     | 378      | C          | 0.022939        | 0.022939     | TRUE         |
| 1     | 379      | F          | 0.368403        | 0.368403     | TRUE         |
| 1     | 380      | S          | 0.026191        | 0.026191     | TRUE         |
| 1     | 381      | N          | 0.056863        | 0.056863     | TRUE         |
| 1     | 382      | V          | 0.26046         | 0.26046      | TRUE         |
| 1     | 383      | Y          | 0.891087        | 0.891087     | TRUE         |
| 1     | 384      | A          | 0.09784         | 0.09784      | TRUE         |
| 1     | 385      | D          | 0.034196        | 0.034196     | TRUE         |
| 1     | 386      | S          | 0.045141        | 0.045141     | TRUE         |
| 1     | 387      | F          | 0.193622        | 0.193622     | TRUE         |
| 1     | 388      | V          | 0.062268        | 0.062268     | TRUE         |
| 1     | 389      | V          | 0.959718        | 0.959718     | TRUE         |
| 1     | 390      | K          | 0.94059         | 0.94059      | TRUE         |
| 1     | 391      | G          | 0.292812        | 0.292812     | TRUE         |
| 1     | 392      | D          | 0.050489        | 0.050489     | TRUE         |
| 1     | 393      | D          | 0.025601        | 0.025601     | TRUE         |
| 1     | 394      | V          | 0.130458        | 0.130458     | TRUE         |
| 1     | 395      | R          | 0.658855        | 0.658855     | TRUE         |
| 1     | 396      | Q          | 0.216641        | 0.216641     | TRUE         |

| seq # | position | amino acid | NetChop Predic | legacy score | scores equal |
|-------|----------|------------|----------------|--------------|--------------|
| 1     | 397      | I          | 0.44954        | 0.44954      | TRUE         |
| 1     | 398      | A          | 0.125725       | 0.125725     | TRUE         |
| 1     | 399      | P          | 0.025618       | 0.025618     | TRUE         |
| 1     | 400      | G          | 0.077366       | 0.077366     | TRUE         |
| 1     | 401      | Q          | 0.025415       | 0.025415     | TRUE         |
| 1     | 402      | T          | 0.033406       | 0.033406     | TRUE         |
| 1     | 403      | G          | 0.032892       | 0.032892     | TRUE         |
| 1     | 404      | V          | 0.790139       | 0.790139     | TRUE         |
| 1     | 405      | I          | 0.64151        | 0.64151      | TRUE         |
| 1     | 406      | A          | 0.445296       | 0.445296     | TRUE         |
| 1     | 407      | D          | 0.028465       | 0.028465     | TRUE         |
| 1     | 408      | Y          | 0.975887       | 0.975887     | TRUE         |
| 1     | 409      | N          | 0.024589       | 0.024589     | TRUE         |
| 1     | 410      | Y          | 0.950603       | 0.950603     | TRUE         |
| 1     | 411      | K          | 0.692475       | 0.692475     | TRUE         |
| 1     | 412      | L          | 0.952592       | 0.952592     | TRUE         |
| 1     | 413      | P          | 0.023052       | 0.023052     | TRUE         |
| 1     | 414      | D          | 0.032753       | 0.032753     | TRUE         |
| 1     | 415      | D          | 0.022908       | 0.022908     | TRUE         |
| 1     | 416      | F          | 0.173811       | 0.173811     | TRUE         |
| 1     | 417      | M          | 0.179024       | 0.179024     | TRUE         |
| 1     | 418      | G          | 0.037648       | 0.037648     | TRUE         |
| 1     | 419      | C          | 0.071828       | 0.071828     | TRUE         |
| 1     | 420      | V          | 0.87174        | 0.87174      | TRUE         |
| 1     | 421      | L          | 0.325177       | 0.325177     | TRUE         |
| 1     | 422      | A          | 0.239884       | 0.239884     | TRUE         |
| 1     | 423      | W          | 0.629587       | 0.629587     | TRUE         |
| 1     | 424      | N          | 0.0245         | 0.0245       | TRUE         |
| 1     | 425      | T          | 0.02327        | 0.02327      | TRUE         |
| 1     | 426      | R          | 0.407908       | 0.407908     | TRUE         |
| 1     | 427      | N          | 0.036727       | 0.036727     | TRUE         |
| 1     | 428      | I          | 0.765822       | 0.765822     | TRUE         |
| 1     | 429      | D          | 0.09212        | 0.09212      | TRUE         |
| 1     | 430      | A          | 0.072744       | 0.072744     | TRUE         |
| 1     | 431      | T          | 0.024103       | 0.024103     | TRUE         |
| 1     | 432      | S          | 0.034989       | 0.034989     | TRUE         |
| 1     | 433      | T          | 0.032867       | 0.032867     | TRUE         |
| 1     | 434      | G          | 0.037172       | 0.037172     | TRUE         |
| 1     | 435      | N          | 0.025766       | 0.025766     | TRUE         |
| 1     | 436      | Y          | 0.55055        | 0.55055      | TRUE         |
| 1     | 437      | N          | 0.023242       | 0.023242     | TRUE         |
| 1     | 438      | Y          | 0.960883       | 0.960883     | TRUE         |
| 1     | 439      | K          | 0.930985       | 0.930985     | TRUE         |
| 1     | 440      | Y          | 0.970695       | 0.970695     | TRUE         |

| seq # | position | amino acid | NetChop Predic | legacy score | scores equal |
|-------|----------|------------|----------------|--------------|--------------|
| 1     | 441      | R          | 0.060704       | 0.060704     | TRUE         |
| 1     | 442      | Y          | 0.966982       | 0.966982     | TRUE         |
| 1     | 443      | L          | 0.620103       | 0.620103     | TRUE         |
| 1     | 444      | R          | 0.612315       | 0.612315     | TRUE         |
| 1     | 445      | H          | 0.10743        | 0.10743      | TRUE         |
| 1     | 446      | G          | 0.117311       | 0.117311     | TRUE         |
| 1     | 447      | K          | 0.463407       | 0.463407     | TRUE         |
| 1     | 448      | L          | 0.976216       | 0.976216     | TRUE         |
| 1     | 449      | R          | 0.260032       | 0.260032     | TRUE         |
| 1     | 450      | P          | 0.162685       | 0.162685     | TRUE         |
| 1     | 451      | F          | 0.930752       | 0.930752     | TRUE         |
| 1     | 452      | E          | 0.022801       | 0.022801     | TRUE         |
| 1     | 453      | R          | 0.579923       | 0.579923     | TRUE         |
| 1     | 454      | D          | 0.042931       | 0.042931     | TRUE         |
| 1     | 455      | I          | 0.818478       | 0.818478     | TRUE         |
| 1     | 456      | S          | 0.030776       | 0.030776     | TRUE         |
| 1     | 457      | N          | 0.309362       | 0.309362     | TRUE         |
| 1     | 458      | V          | 0.954019       | 0.954019     | TRUE         |
| 1     | 459      | P          | 0.288313       | 0.288313     | TRUE         |
| 1     | 460      | F          | 0.97307        | 0.97307      | TRUE         |
| 1     | 461      | S          | 0.025092       | 0.025092     | TRUE         |
| 1     | 462      | P          | 0.711924       | 0.711924     | TRUE         |
| 1     | 463      | D          | 0.103156       | 0.103156     | TRUE         |
| 1     | 464      | G          | 0.254354       | 0.254354     | TRUE         |
| 1     | 465      | K          | 0.55946        | 0.55946      | TRUE         |
| 1     | 466      | P          | 0.53455        | 0.53455      | TRUE         |
| 1     | 467      | C          | 0.024604       | 0.024604     | TRUE         |
| 1     | 468      | T          | 0.029194       | 0.029194     | TRUE         |
| 1     | 469      | P          | 0.258902       | 0.258902     | TRUE         |
| 1     | 470      | P          | 0.044817       | 0.044817     | TRUE         |
| 1     | 471      | A          | 0.284091       | 0.284091     | TRUE         |
| 1     | 472      | L          | 0.78605        | 0.78605      | TRUE         |
| 1     | 473      | N          | 0.17637        | 0.17637      | TRUE         |
| 1     | 474      | C          | 0.027934       | 0.027934     | TRUE         |
| 1     | 475      | Y          | 0.927795       | 0.927795     | TRUE         |
| 1     | 476      | W          | 0.849349       | 0.849349     | TRUE         |
| 1     | 477      | P          | 0.045543       | 0.045543     | TRUE         |
| 1     | 478      | L          | 0.455832       | 0.455832     | TRUE         |
| 1     | 479      | N          | 0.027666       | 0.027666     | TRUE         |
| 1     | 480      | D          | 0.022798       | 0.022798     | TRUE         |
| 1     | 481      | Y          | 0.878771       | 0.878771     | TRUE         |
| 1     | 482      | G          | 0.099431       | 0.099431     | TRUE         |
| 1     | 483      | F          | 0.7302         | 0.7302       | TRUE         |
| 1     | 484      | Y          | 0.922937       | 0.922937     | TRUE         |

| seq # | position | amino acid | NetChop Predic | legacy score | scores equal |
|-------|----------|------------|----------------|--------------|--------------|
| 1     | 485      | T          | 0.191482       | 0.191482     | TRUE         |
| 1     | 486      | T          | 0.056504       | 0.056504     | TRUE         |
| 1     | 487      | T          | 0.424839       | 0.424839     | TRUE         |
| 1     | 488      | G          | 0.292035       | 0.292035     | TRUE         |
| 1     | 489      | I          | 0.383624       | 0.383624     | TRUE         |
| 1     | 490      | G          | 0.04091        | 0.04091      | TRUE         |
| 1     | 491      | Y          | 0.725587       | 0.725587     | TRUE         |
| 1     | 492      | Q          | 0.028077       | 0.028077     | TRUE         |
| 1     | 493      | P          | 0.030747       | 0.030747     | TRUE         |
| 1     | 494      | Y          | 0.793641       | 0.793641     | TRUE         |
| 1     | 495      | R          | 0.062749       | 0.062749     | TRUE         |
| 1     | 496      | V          | 0.23712        | 0.23712      | TRUE         |
| 1     | 497      | V          | 0.579547       | 0.579547     | TRUE         |
| 1     | 498      | V          | 0.90967        | 0.90967      | TRUE         |
| 1     | 499      | L          | 0.965873       | 0.965873     | TRUE         |
| 1     | 500      | S          | 0.567005       | 0.567005     | TRUE         |
| 1     | 501      | F          | 0.954144       | 0.954144     | TRUE         |
| 1     | 502      | E          | 0.037025       | 0.037025     | TRUE         |
| 1     | 503      | L          | 0.944547       | 0.944547     | TRUE         |
| 1     | 504      | L          | 0.777858       | 0.777858     | TRUE         |
| 1     | 505      | N          | 0.049561       | 0.049561     | TRUE         |
| 1     | 506      | A          | 0.214618       | 0.214618     | TRUE         |
| 1     | 507      | P          | 0.059194       | 0.059194     | TRUE         |
| 1     | 508      | A          | 0.307513       | 0.307513     | TRUE         |
| 1     | 509      | T          | 0.036431       | 0.036431     | TRUE         |
| 1     | 510      | V          | 0.976864       | 0.976864     | TRUE         |
| 1     | 511      | C          | 0.05408        | 0.05408      | TRUE         |
| 1     | 512      | G          | 0.035651       | 0.035651     | TRUE         |
| 1     | 513      | P          | 0.048091       | 0.048091     | TRUE         |
| 1     | 514      | K          | 0.919262       | 0.919262     | TRUE         |
| 1     | 515      | L          | 0.828358       | 0.828358     | TRUE         |
| 1     | 516      | S          | 0.023896       | 0.023896     | TRUE         |
| 1     | 517      | T          | 0.058876       | 0.058876     | TRUE         |
| 1     | 518      | D          | 0.028528       | 0.028528     | TRUE         |
| 1     | 519      | L          | 0.430414       | 0.430414     | TRUE         |
| 1     | 520      | I          | 0.610574       | 0.610574     | TRUE         |
| 1     | 521      | K          | 0.214085       | 0.214085     | TRUE         |
| 1     | 522      | N          | 0.063282       | 0.063282     | TRUE         |
| 1     | 523      | Q          | 0.051454       | 0.051454     | TRUE         |
| 1     | 524      | C          | 0.026447       | 0.026447     | TRUE         |
| 1     | 525      | V          | 0.364193       | 0.364193     | TRUE         |
| 1     | 526      | N          | 0.031319       | 0.031319     | TRUE         |
| 1     | 527      | F          | 0.905618       | 0.905618     | TRUE         |
| 1     | 528      | N          | 0.024457       | 0.024457     | TRUE         |

| seq # | position | amino acid | NetChop Predic | legacy score | scores equal |
|-------|----------|------------|----------------|--------------|--------------|
| 1     | 529      | F          | 0.628572       | 0.628572     | TRUE         |
| 1     | 530      | N          | 0.025701       | 0.025701     | TRUE         |
| 1     | 531      | G          | 0.030044       | 0.030044     | TRUE         |
| 1     | 532      | L          | 0.944746       | 0.944746     | TRUE         |
| 1     | 533      | T          | 0.072811       | 0.072811     | TRUE         |
| 1     | 534      | G          | 0.066785       | 0.066785     | TRUE         |
| 1     | 535      | T          | 0.053856       | 0.053856     | TRUE         |
| 1     | 536      | G          | 0.130306       | 0.130306     | TRUE         |
| 1     | 537      | V          | 0.142428       | 0.142428     | TRUE         |
| 1     | 538      | L          | 0.901788       | 0.901788     | TRUE         |
| 1     | 539      | T          | 0.499404       | 0.499404     | TRUE         |
| 1     | 540      | P          | 0.158185       | 0.158185     | TRUE         |
| 1     | 541      | S          | 0.071489       | 0.071489     | TRUE         |
| 1     | 542      | S          | 0.06724        | 0.06724      | TRUE         |
| 1     | 543      | K          | 0.794428       | 0.794428     | TRUE         |
| 1     | 544      | R          | 0.878876       | 0.878876     | TRUE         |
| 1     | 545      | F          | 0.968579       | 0.968579     | TRUE         |
| 1     | 546      | Q          | 0.023294       | 0.023294     | TRUE         |
| 1     | 547      | P          | 0.100258       | 0.100258     | TRUE         |
| 1     | 548      | F          | 0.889344       | 0.889344     | TRUE         |
| 1     | 549      | Q          | 0.084716       | 0.084716     | TRUE         |
| 1     | 550      | Q          | 0.106743       | 0.106743     | TRUE         |
| 1     | 551      | F          | 0.973297       | 0.973297     | TRUE         |
| 1     | 552      | G          | 0.049227       | 0.049227     | TRUE         |
| 1     | 553      | R          | 0.606064       | 0.606064     | TRUE         |
| 1     | 554      | D          | 0.253257       | 0.253257     | TRUE         |
| 1     | 555      | V          | 0.314875       | 0.314875     | TRUE         |
| 1     | 556      | S          | 0.023162       | 0.023162     | TRUE         |
| 1     | 557      | D          | 0.172477       | 0.172477     | TRUE         |
| 1     | 558      | F          | 0.489672       | 0.489672     | TRUE         |
| 1     | 559      | T          | 0.038578       | 0.038578     | TRUE         |
| 1     | 560      | D          | 0.404181       | 0.404181     | TRUE         |
| 1     | 561      | S          | 0.080225       | 0.080225     | TRUE         |
| 1     | 562      | V          | 0.970205       | 0.970205     | TRUE         |
| 1     | 563      | R          | 0.314918       | 0.314918     | TRUE         |
| 1     | 564      | D          | 0.054671       | 0.054671     | TRUE         |
| 1     | 565      | P          | 0.072717       | 0.072717     | TRUE         |
| 1     | 566      | K          | 0.130178       | 0.130178     | TRUE         |
| 1     | 567      | T          | 0.058179       | 0.058179     | TRUE         |
| 1     | 568      | S          | 0.111461       | 0.111461     | TRUE         |
| 1     | 569      | E          | 0.075691       | 0.075691     | TRUE         |
| 1     | 570      | I          | 0.910032       | 0.910032     | TRUE         |
| 1     | 571      | L          | 0.945552       | 0.945552     | TRUE         |
| 1     | 572      | D          | 0.059687       | 0.059687     | TRUE         |

| seq # | position | amino acid | NetChop Predic | legacy score | scores equal |
|-------|----------|------------|----------------|--------------|--------------|
| 1     | 573      | I          | 0.876851       | 0.876851     | TRUE         |
| 1     | 574      | S          | 0.036155       | 0.036155     | TRUE         |
| 1     | 575      | P          | 0.02834        | 0.02834      | TRUE         |
| 1     | 576      | C          | 0.050315       | 0.050315     | TRUE         |
| 1     | 577      | S          | 0.034015       | 0.034015     | TRUE         |
| 1     | 578      | F          | 0.952896       | 0.952896     | TRUE         |
| 1     | 579      | G          | 0.042027       | 0.042027     | TRUE         |
| 1     | 580      | G          | 0.039285       | 0.039285     | TRUE         |
| 1     | 581      | V          | 0.393687       | 0.393687     | TRUE         |
| 1     | 582      | S          | 0.094861       | 0.094861     | TRUE         |
| 1     | 583      | V          | 0.37755        | 0.37755      | TRUE         |
| 1     | 584      | I          | 0.873363       | 0.873363     | TRUE         |
| 1     | 585      | T          | 0.074429       | 0.074429     | TRUE         |
| 1     | 586      | P          | 0.036559       | 0.036559     | TRUE         |
| 1     | 587      | G          | 0.140912       | 0.140912     | TRUE         |
| 1     | 588      | T          | 0.27981        | 0.27981      | TRUE         |
| 1     | 589      | N          | 0.045791       | 0.045791     | TRUE         |
| 1     | 590      | A          | 0.134216       | 0.134216     | TRUE         |
| 1     | 591      | S          | 0.093685       | 0.093685     | TRUE         |
| 1     | 592      | S          | 0.05924        | 0.05924      | TRUE         |
| 1     | 593      | E          | 0.032483       | 0.032483     | TRUE         |
| 1     | 594      | V          | 0.784925       | 0.784925     | TRUE         |
| 1     | 595      | A          | 0.128982       | 0.128982     | TRUE         |
| 1     | 596      | V          | 0.068761       | 0.068761     | TRUE         |
| 1     | 597      | L          | 0.837271       | 0.837271     | TRUE         |
| 1     | 598      | Y          | 0.971939       | 0.971939     | TRUE         |
| 1     | 599      | Q          | 0.044814       | 0.044814     | TRUE         |
| 1     | 600      | D          | 0.058009       | 0.058009     | TRUE         |
| 1     | 601      | V          | 0.802544       | 0.802544     | TRUE         |
| 1     | 602      | N          | 0.033166       | 0.033166     | TRUE         |
| 1     | 603      | C          | 0.023004       | 0.023004     | TRUE         |
| 1     | 604      | T          | 0.095759       | 0.095759     | TRUE         |
| 1     | 605      | D          | 0.130669       | 0.130669     | TRUE         |
| 1     | 606      | V          | 0.827049       | 0.827049     | TRUE         |
| 1     | 607      | S          | 0.024234       | 0.024234     | TRUE         |
| 1     | 608      | T          | 0.092326       | 0.092326     | TRUE         |
| 1     | 609      | A          | 0.230868       | 0.230868     | TRUE         |
| 1     | 610      | I          | 0.922045       | 0.922045     | TRUE         |
| 1     | 611      | H          | 0.087678       | 0.087678     | TRUE         |
| 1     | 612      | A          | 0.13594        | 0.13594      | TRUE         |
| 1     | 613      | D          | 0.115649       | 0.115649     | TRUE         |
| 1     | 614      | Q          | 0.047421       | 0.047421     | TRUE         |
| 1     | 615      | L          | 0.272737       | 0.272737     | TRUE         |
| 1     | 616      | T          | 0.023863       | 0.023863     | TRUE         |

| seq # | position | amino acid | NetChop Predic | legacy score | scores equal |
|-------|----------|------------|----------------|--------------|--------------|
| 1     | 617      | P          | 0.044619       | 0.044619     | TRUE         |
| 1     | 618      | A          | 0.1486         | 0.1486       | TRUE         |
| 1     | 619      | W          | 0.900175       | 0.900175     | TRUE         |
| 1     | 620      | R          | 0.061712       | 0.061712     | TRUE         |
| 1     | 621      | I          | 0.555948       | 0.555948     | TRUE         |
| 1     | 622      | Y          | 0.889904       | 0.889904     | TRUE         |
| 1     | 623      | S          | 0.027428       | 0.027428     | TRUE         |
| 1     | 624      | T          | 0.161186       | 0.161186     | TRUE         |
| 1     | 625      | G          | 0.292039       | 0.292039     | TRUE         |
| 1     | 626      | N          | 0.029385       | 0.029385     | TRUE         |
| 1     | 627      | N          | 0.025945       | 0.025945     | TRUE         |
| 1     | 628      | V          | 0.761649       | 0.761649     | TRUE         |
| 1     | 629      | F          | 0.967718       | 0.967718     | TRUE         |
| 1     | 630      | Q          | 0.041237       | 0.041237     | TRUE         |
| 1     | 631      | T          | 0.271776       | 0.271776     | TRUE         |
| 1     | 632      | Q          | 0.53096        | 0.53096      | TRUE         |
| 1     | 633      | A          | 0.299565       | 0.299565     | TRUE         |
| 1     | 634      | G          | 0.041774       | 0.041774     | TRUE         |
| 1     | 635      | C          | 0.03004        | 0.03004      | TRUE         |
| 1     | 636      | L          | 0.284911       | 0.284911     | TRUE         |
| 1     | 637      | I          | 0.434564       | 0.434564     | TRUE         |
| 1     | 638      | G          | 0.045258       | 0.045258     | TRUE         |
| 1     | 639      | A          | 0.074878       | 0.074878     | TRUE         |
| 1     | 640      | E          | 0.024303       | 0.024303     | TRUE         |
| 1     | 641      | H          | 0.036338       | 0.036338     | TRUE         |
| 1     | 642      | V          | 0.614183       | 0.614183     | TRUE         |
| 1     | 643      | D          | 0.054992       | 0.054992     | TRUE         |
| 1     | 644      | T          | 0.055043       | 0.055043     | TRUE         |
| 1     | 645      | S          | 0.053106       | 0.053106     | TRUE         |
| 1     | 646      | Y          | 0.974135       | 0.974135     | TRUE         |
| 1     | 647      | E          | 0.049364       | 0.049364     | TRUE         |
| 1     | 648      | C          | 0.206886       | 0.206886     | TRUE         |
| 1     | 649      | D          | 0.0233         | 0.0233       | TRUE         |
| 1     | 650      | I          | 0.075256       | 0.075256     | TRUE         |
| 1     | 651      | P          | 0.022901       | 0.022901     | TRUE         |
| 1     | 652      | I          | 0.219864       | 0.219864     | TRUE         |
| 1     | 653      | G          | 0.032424       | 0.032424     | TRUE         |
| 1     | 654      | A          | 0.254982       | 0.254982     | TRUE         |
| 1     | 655      | G          | 0.040918       | 0.040918     | TRUE         |
| 1     | 656      | I          | 0.580928       | 0.580928     | TRUE         |
| 1     | 657      | C          | 0.026806       | 0.026806     | TRUE         |
| 1     | 658      | A          | 0.609998       | 0.609998     | TRUE         |
| 1     | 659      | S          | 0.025877       | 0.025877     | TRUE         |
| 1     | 660      | Y          | 0.944756       | 0.944756     | TRUE         |

| seq # | position | amino acid | NetChop Predic | legacy score | scores equal |
|-------|----------|------------|----------------|--------------|--------------|
| 1     | 661      | H          | 0.040062       | 0.040062     | TRUE         |
| 1     | 662      | T          | 0.073953       | 0.073953     | TRUE         |
| 1     | 663      | V          | 0.733936       | 0.733936     | TRUE         |
| 1     | 664      | S          | 0.054444       | 0.054444     | TRUE         |
| 1     | 665      | L          | 0.945789       | 0.945789     | TRUE         |
| 1     | 666      | L          | 0.970319       | 0.970319     | TRUE         |
| 1     | 667      | R          | 0.972625       | 0.972625     | TRUE         |
| 1     | 668      | S          | 0.029803       | 0.029803     | TRUE         |
| 1     | 669      | T          | 0.0283         | 0.0283       | TRUE         |
| 1     | 670      | S          | 0.036397       | 0.036397     | TRUE         |
| 1     | 671      | Q          | 0.034305       | 0.034305     | TRUE         |
| 1     | 672      | K          | 0.897781       | 0.897781     | TRUE         |
| 1     | 673      | S          | 0.040035       | 0.040035     | TRUE         |
| 1     | 674      | I          | 0.408338       | 0.408338     | TRUE         |
| 1     | 675      | V          | 0.419109       | 0.419109     | TRUE         |
| 1     | 676      | A          | 0.423187       | 0.423187     | TRUE         |
| 1     | 677      | Y          | 0.963311       | 0.963311     | TRUE         |
| 1     | 678      | T          | 0.072785       | 0.072785     | TRUE         |
| 1     | 679      | M          | 0.972172       | 0.972172     | TRUE         |
| 1     | 680      | S          | 0.051602       | 0.051602     | TRUE         |
| 1     | 681      | L          | 0.974925       | 0.974925     | TRUE         |
| 1     | 682      | G          | 0.037909       | 0.037909     | TRUE         |
| 1     | 683      | A          | 0.132639       | 0.132639     | TRUE         |
| 1     | 684      | D          | 0.023279       | 0.023279     | TRUE         |
| 1     | 685      | S          | 0.024635       | 0.024635     | TRUE         |
| 1     | 686      | S          | 0.029896       | 0.029896     | TRUE         |
| 1     | 687      | I          | 0.772053       | 0.772053     | TRUE         |
| 1     | 688      | A          | 0.170974       | 0.170974     | TRUE         |
| 1     | 689      | Y          | 0.941604       | 0.941604     | TRUE         |
| 1     | 690      | S          | 0.037215       | 0.037215     | TRUE         |
| 1     | 691      | N          | 0.035356       | 0.035356     | TRUE         |
| 1     | 692      | N          | 0.024889       | 0.024889     | TRUE         |
| 1     | 693      | T          | 0.041227       | 0.041227     | TRUE         |
| 1     | 694      | I          | 0.711025       | 0.711025     | TRUE         |
| 1     | 695      | A          | 0.257003       | 2.57E-01     | TRUE         |
| 1     | 696      | I          | 0.603389       | 6.03E-01     | TRUE         |
| 1     | 697      | P          | 0.042974       | 4.30E-02     | TRUE         |
| 1     | 698      | T          | 0.034006       | 3.40E-02     | TRUE         |
| 1     | 699      | N          | 0.030469       | 3.05E-02     | TRUE         |
| 1     | 700      | F          | 0.729809       | 7.30E-01     | TRUE         |
| 1     | 701      | S          | 0.023533       | 2.35E-02     | TRUE         |
| 1     | 702      | I          | 0.950572       | 9.51E-01     | TRUE         |
| 1     | 703      | S          | 0.058093       | 5.81E-02     | TRUE         |
| 1     | 704      | I          | 0.969885       | 9.70E-01     | TRUE         |

| seq # | position | amino acid | NetChop Predic | legacy score | scores equal |
|-------|----------|------------|----------------|--------------|--------------|
| 1     | 705      | T          | 0.031262       | 3.13E-02     | TRUE         |
| 1     | 706      | T          | 0.197827       | 1.98E-01     | TRUE         |
| 1     | 707      | E          | 0.026379       | 2.64E-02     | TRUE         |
| 1     | 708      | V          | 0.788997       | 7.89E-01     | TRUE         |
| 1     | 709      | M          | 0.650257       | 6.50E-01     | TRUE         |
| 1     | 710      | P          | 0.024191       | 2.42E-02     | TRUE         |
| 1     | 711      | V          | 0.894645       | 8.95E-01     | TRUE         |
| 1     | 712      | S          | 0.036549       | 3.65E-02     | TRUE         |
| 1     | 713      | M          | 0.701527       | 7.02E-01     | TRUE         |
| 1     | 714      | A          | 0.279285       | 2.79E-01     | TRUE         |
| 1     | 715      | K          | 0.922634       | 9.23E-01     | TRUE         |
| 1     | 716      | T          | 0.088447       | 8.84E-02     | TRUE         |
| 1     | 717      | S          | 0.037791       | 3.78E-02     | TRUE         |
| 1     | 718      | V          | 0.446528       | 4.47E-01     | TRUE         |
| 1     | 719      | D          | 0.027185       | 2.72E-02     | TRUE         |
| 1     | 720      | C          | 0.02949        | 2.95E-02     | TRUE         |
| 1     | 721      | N          | 0.023222       | 2.32E-02     | TRUE         |
| 1     | 722      | M          | 0.868094       | 8.68E-01     | TRUE         |
| 1     | 723      | Y          | 0.954373       | 9.54E-01     | TRUE         |
| 1     | 724      | I          | 0.908371       | 9.08E-01     | TRUE         |
| 1     | 725      | C          | 0.02949        | 2.95E-02     | TRUE         |
| 1     | 726      | G          | 0.026566       | 2.66E-02     | TRUE         |
| 1     | 727      | D          | 0.023588       | 2.36E-02     | TRUE         |
| 1     | 728      | S          | 0.023712       | 2.37E-02     | TRUE         |
| 1     | 729      | T          | 0.034589       | 3.46E-02     | TRUE         |
| 1     | 730      | E          | 0.052655       | 5.27E-02     | TRUE         |
| 1     | 731      | C          | 0.044193       | 4.42E-02     | TRUE         |
| 1     | 732      | A          | 0.164582       | 1.65E-01     | TRUE         |
| 1     | 733      | N          | 0.023876       | 2.39E-02     | TRUE         |
| 1     | 734      | L          | 0.83189        | 8.32E-01     | TRUE         |
| 1     | 735      | L          | 0.438693       | 4.39E-01     | TRUE         |
| 1     | 736      | L          | 0.904153       | 9.04E-01     | TRUE         |
| 1     | 737      | Q          | 0.038279       | 3.83E-02     | TRUE         |
| 1     | 738      | Y          | 0.356686       | 3.57E-01     | TRUE         |
| 1     | 739      | G          | 0.042149       | 4.21E-02     | TRUE         |
| 1     | 740      | S          | 0.030362       | 3.04E-02     | TRUE         |
| 1     | 741      | F          | 0.934105       | 9.34E-01     | TRUE         |
| 1     | 742      | C          | 0.026481       | 2.65E-02     | TRUE         |
| 1     | 743      | T          | 0.131498       | 1.31E-01     | TRUE         |
| 1     | 744      | Q          | 0.408316       | 4.08E-01     | TRUE         |
| 1     | 745      | L          | 0.97369        | 9.74E-01     | TRUE         |
| 1     | 746      | N          | 0.035365       | 3.54E-02     | TRUE         |
| 1     | 747      | R          | 0.819448       | 8.19E-01     | TRUE         |
| 1     | 748      | A          | 0.075418       | 7.54E-02     | TRUE         |

| seq # | position | amino acid | NetChop Predic | legacy score | scores equal |
|-------|----------|------------|----------------|--------------|--------------|
| 1     | 749      | L          | 0.103822       | 1.04E-01     | TRUE         |
| 1     | 750      | S          | 0.027961       | 2.80E-02     | TRUE         |
| 1     | 751      | G          | 0.039042       | 3.90E-02     | TRUE         |
| 1     | 752      | I          | 0.861289       | 8.61E-01     | TRUE         |
| 1     | 753      | A          | 0.091589       | 9.16E-02     | TRUE         |
| 1     | 754      | A          | 0.411931       | 4.12E-01     | TRUE         |
| 1     | 755      | E          | 0.040861       | 4.09E-02     | TRUE         |
| 1     | 756      | Q          | 0.526878       | 5.27E-01     | TRUE         |
| 1     | 757      | D          | 0.026529       | 2.65E-02     | TRUE         |
| 1     | 758      | R          | 0.046903       | 4.69E-02     | TRUE         |
| 1     | 759      | N          | 0.022757       | 2.28E-02     | TRUE         |
| 1     | 760      | T          | 0.024059       | 2.41E-02     | TRUE         |
| 1     | 761      | R          | 0.157262       | 1.57E-01     | TRUE         |
| 1     | 762      | E          | 0.033798       | 3.38E-02     | TRUE         |
| 1     | 763      | V          | 0.542081       | 5.42E-01     | TRUE         |
| 1     | 764      | F          | 0.277268       | 2.77E-01     | TRUE         |
| 1     | 765      | A          | 0.124033       | 1.24E-01     | TRUE         |
| 1     | 766      | Q          | 0.026944       | 2.69E-02     | TRUE         |
| 1     | 767      | V          | 0.920954       | 9.21E-01     | TRUE         |
| 1     | 768      | K          | 0.890121       | 8.90E-01     | TRUE         |
| 1     | 769      | Q          | 0.089397       | 8.94E-02     | TRUE         |
| 1     | 770      | M          | 0.816854       | 8.17E-01     | TRUE         |
| 1     | 771      | Y          | 0.804842       | 8.05E-01     | TRUE         |
| 1     | 772      | K          | 0.262501       | 2.63E-01     | TRUE         |
| 1     | 773      | T          | 0.031892       | 3.19E-02     | TRUE         |
| 1     | 774      | P          | 0.02956        | 2.96E-02     | TRUE         |
| 1     | 775      | T          | 0.024987       | 2.50E-02     | TRUE         |
| 1     | 776      | L          | 0.784027       | 7.84E-01     | TRUE         |
| 1     | 777      | K          | 0.897863       | 8.98E-01     | TRUE         |
| 1     | 778      | Y          | 0.976568       | 9.77E-01     | TRUE         |
| 1     | 779      | F          | 0.707914       | 7.08E-01     | TRUE         |
| 1     | 780      | G          | 0.024069       | 2.41E-02     | TRUE         |
| 1     | 781      | G          | 0.14651        | 1.47E-01     | TRUE         |
| 1     | 782      | F          | 0.897725       | 8.98E-01     | TRUE         |
| 1     | 783      | N          | 0.028456       | 2.85E-02     | TRUE         |
| 1     | 784      | F          | 0.844785       | 8.45E-01     | TRUE         |
| 1     | 785      | S          | 0.659551       | 6.60E-01     | TRUE         |
| 1     | 786      | Q          | 0.430723       | 4.31E-01     | TRUE         |
| 1     | 787      | I          | 0.712608       | 7.13E-01     | TRUE         |
| 1     | 788      | L          | 0.906211       | 9.06E-01     | TRUE         |
| 1     | 789      | P          | 0.034428       | 3.44E-02     | TRUE         |
| 1     | 790      | D          | 0.038318       | 3.83E-02     | TRUE         |
| 1     | 791      | P          | 0.027408       | 2.74E-02     | TRUE         |
| 1     | 792      | L          | 0.552918       | 5.53E-01     | TRUE         |

| seq # | position | amino acid | NetChop Predic | legacy score | scores equal |
|-------|----------|------------|----------------|--------------|--------------|
| 1     | 793      | K          | 0.224716       | 2.25E-01     | TRUE         |
| 1     | 794      | P          | 0.073894       | 7.39E-02     | TRUE         |
| 1     | 795      | T          | 0.663258       | 6.63E-01     | TRUE         |
| 1     | 796      | K          | 0.95129        | 9.51E-01     | TRUE         |
| 1     | 797      | R          | 0.581704       | 5.82E-01     | TRUE         |
| 1     | 798      | S          | 0.276055       | 2.76E-01     | TRUE         |
| 1     | 799      | F          | 0.764333       | 7.64E-01     | TRUE         |
| 1     | 800      | I          | 0.079442       | 7.94E-02     | TRUE         |
| 1     | 801      | E          | 0.059759       | 5.98E-02     | TRUE         |
| 1     | 802      | D          | 0.030148       | 3.01E-02     | TRUE         |
| 1     | 803      | L          | 0.576903       | 5.77E-01     | TRUE         |
| 1     | 804      | L          | 0.581771       | 5.82E-01     | TRUE         |
| 1     | 805      | F          | 0.593781       | 5.94E-01     | TRUE         |
| 1     | 806      | N          | 0.025937       | 2.59E-02     | TRUE         |
| 1     | 807      | K          | 0.473942       | 4.74E-01     | TRUE         |
| 1     | 808      | V          | 0.944355       | 9.44E-01     | TRUE         |
| 1     | 809      | T          | 0.045954       | 4.60E-02     | TRUE         |
| 1     | 810      | L          | 0.940324       | 9.40E-01     | TRUE         |
| 1     | 811      | A          | 0.814134       | 8.14E-01     | TRUE         |
| 1     | 812      | D          | 0.047203       | 4.72E-02     | TRUE         |
| 1     | 813      | A          | 0.048203       | 4.82E-02     | TRUE         |
| 1     | 814      | G          | 0.023904       | 2.39E-02     | TRUE         |
| 1     | 815      | F          | 0.668321       | 6.68E-01     | TRUE         |
| 1     | 816      | M          | 0.106202       | 1.06E-01     | TRUE         |
| 1     | 817      | K          | 0.953949       | 9.54E-01     | TRUE         |
| 1     | 818      | Q          | 0.480575       | 4.81E-01     | TRUE         |
| 1     | 819      | Y          | 0.953202       | 9.53E-01     | TRUE         |
| 1     | 820      | G          | 0.032301       | 3.23E-02     | TRUE         |
| 1     | 821      | E          | 0.030774       | 3.08E-02     | TRUE         |
| 1     | 822      | C          | 0.024793       | 2.48E-02     | TRUE         |
| 1     | 823      | L          | 0.190746       | 1.91E-01     | TRUE         |
| 1     | 824      | G          | 0.0283         | 2.83E-02     | TRUE         |
| 1     | 825      | D          | 0.034729       | 3.47E-02     | TRUE         |
| 1     | 826      | I          | 0.254506       | 2.55E-01     | TRUE         |
| 1     | 827      | N          | 0.023316       | 2.33E-02     | TRUE         |
| 1     | 828      | A          | 0.088055       | 8.81E-02     | TRUE         |
| 1     | 829      | R          | 0.083107       | 8.31E-02     | TRUE         |
| 1     | 830      | D          | 0.090586       | 9.06E-02     | TRUE         |
| 1     | 831      | L          | 0.426692       | 4.27E-01     | TRUE         |
| 1     | 832      | I          | 0.164412       | 1.64E-01     | TRUE         |
| 1     | 833      | C          | 0.023633       | 2.36E-02     | TRUE         |
| 1     | 834      | A          | 0.056116       | 5.61E-02     | TRUE         |
| 1     | 835      | Q          | 0.077224       | 7.72E-02     | TRUE         |
| 1     | 836      | K          | 0.960105       | 9.60E-01     | TRUE         |

| seq # | position | amino acid | NetChop Predic | legacy score | scores equal |
|-------|----------|------------|----------------|--------------|--------------|
| 1     | 837      | F          | 0.585716       | 5.86E-01     | TRUE         |
| 1     | 838      | N          | 0.025846       | 2.58E-02     | TRUE         |
| 1     | 839      | G          | 0.027668       | 2.77E-02     | TRUE         |
| 1     | 840      | L          | 0.36922        | 3.69E-01     | TRUE         |
| 1     | 841      | T          | 0.038104       | 3.81E-02     | TRUE         |
| 1     | 842      | V          | 0.872465       | 8.72E-01     | TRUE         |
| 1     | 843      | L          | 0.934773       | 9.35E-01     | TRUE         |
| 1     | 844      | P          | 0.083586       | 8.36E-02     | TRUE         |
| 1     | 845      | P          | 0.031457       | 3.15E-02     | TRUE         |
| 1     | 846      | L          | 0.789843       | 7.90E-01     | TRUE         |
| 1     | 847      | L          | 0.916968       | 9.17E-01     | TRUE         |
| 1     | 848      | T          | 0.027225       | 2.72E-02     | TRUE         |
| 1     | 849      | D          | 0.03582        | 3.58E-02     | TRUE         |
| 1     | 850      | D          | 0.062073       | 6.21E-02     | TRUE         |
| 1     | 851      | M          | 0.684001       | 6.84E-01     | TRUE         |
| 1     | 852      | I          | 0.435847       | 4.36E-01     | TRUE         |
| 1     | 853      | A          | 0.192659       | 1.93E-01     | TRUE         |
| 1     | 854      | A          | 0.23881        | 2.39E-01     | TRUE         |
| 1     | 855      | Y          | 0.972437       | 9.72E-01     | TRUE         |
| 1     | 856      | T          | 0.030316       | 3.03E-02     | TRUE         |
| 1     | 857      | A          | 0.510478       | 5.10E-01     | TRUE         |
| 1     | 858      | A          | 0.262063       | 2.62E-01     | TRUE         |
| 1     | 859      | L          | 0.776558       | 7.77E-01     | TRUE         |
| 1     | 860      | V          | 0.316902       | 3.17E-01     | TRUE         |
| 1     | 861      | S          | 0.052568       | 5.26E-02     | TRUE         |
| 1     | 862      | G          | 0.06201        | 6.20E-02     | TRUE         |
| 1     | 863      | T          | 0.031701       | 3.17E-02     | TRUE         |
| 1     | 864      | A          | 0.413518       | 4.14E-01     | TRUE         |
| 1     | 865      | T          | 0.044145       | 4.41E-02     | TRUE         |
| 1     | 866      | A          | 0.923514       | 9.24E-01     | TRUE         |
| 1     | 867      | G          | 0.063721       | 6.37E-02     | TRUE         |
| 1     | 868      | W          | 0.739938       | 7.40E-01     | TRUE         |
| 1     | 869      | T          | 0.024875       | 2.49E-02     | TRUE         |
| 1     | 870      | F          | 0.770046       | 7.70E-01     | TRUE         |
| 1     | 871      | G          | 0.06126        | 6.13E-02     | TRUE         |
| 1     | 872      | A          | 0.702723       | 7.03E-01     | TRUE         |
| 1     | 873      | G          | 0.072756       | 7.28E-02     | TRUE         |
| 1     | 874      | A          | 0.266096       | 2.66E-01     | TRUE         |
| 1     | 875      | A          | 0.061859       | 6.19E-02     | TRUE         |
| 1     | 876      | L          | 0.822451       | 8.22E-01     | TRUE         |
| 1     | 877      | Q          | 0.023342       | 2.33E-02     | TRUE         |
| 1     | 878      | I          | 0.136952       | 1.37E-01     | TRUE         |
| 1     | 879      | P          | 0.024595       | 2.46E-02     | TRUE         |
| 1     | 880      | F          | 0.108552       | 1.09E-01     | TRUE         |

| seq # | position | amino acid | NetChop Predic | legacy score | scores equal |
|-------|----------|------------|----------------|--------------|--------------|
| 1     | 881      | A          | 0.033441       | 3.34E-02     | TRUE         |
| 1     | 882      | M          | 0.770697       | 7.71E-01     | TRUE         |
| 1     | 883      | Q          | 0.228864       | 2.29E-01     | TRUE         |
| 1     | 884      | M          | 0.881233       | 8.81E-01     | TRUE         |
| 1     | 885      | A          | 0.129659       | 1.30E-01     | TRUE         |
| 1     | 886      | Y          | 0.969849       | 9.70E-01     | TRUE         |
| 1     | 887      | R          | 0.02954        | 2.95E-02     | TRUE         |
| 1     | 888      | F          | 0.197499       | 1.97E-01     | TRUE         |
| 1     | 889      | N          | 0.022408       | 2.24E-02     | TRUE         |
| 1     | 890      | G          | 0.023449       | 2.34E-02     | TRUE         |
| 1     | 891      | I          | 0.141404       | 1.41E-01     | TRUE         |
| 1     | 892      | G          | 0.030843       | 3.08E-02     | TRUE         |
| 1     | 893      | V          | 0.288981       | 2.89E-01     | TRUE         |
| 1     | 894      | T          | 0.518429       | 5.18E-01     | TRUE         |
| 1     | 895      | Q          | 0.106569       | 1.07E-01     | TRUE         |
| 1     | 896      | N          | 0.027635       | 2.76E-02     | TRUE         |
| 1     | 897      | V          | 0.551045       | 5.51E-01     | TRUE         |
| 1     | 898      | L          | 0.954729       | 9.55E-01     | TRUE         |
| 1     | 899      | Y          | 0.93115        | 9.31E-01     | TRUE         |
| 1     | 900      | E          | 0.041446       | 4.14E-02     | TRUE         |
| 1     | 901      | N          | 0.031548       | 3.15E-02     | TRUE         |
| 1     | 902      | Q          | 0.02411        | 2.41E-02     | TRUE         |
| 1     | 903      | K          | 0.55703        | 5.57E-01     | TRUE         |
| 1     | 904      | Q          | 0.028414       | 2.84E-02     | TRUE         |
| 1     | 905      | I          | 0.838986       | 8.39E-01     | TRUE         |
| 1     | 906      | A          | 0.124648       | 1.25E-01     | TRUE         |
| 1     | 907      | N          | 0.029432       | 2.94E-02     | TRUE         |
| 1     | 908      | Q          | 0.042486       | 4.25E-02     | TRUE         |
| 1     | 909      | F          | 0.502933       | 5.03E-01     | TRUE         |
| 1     | 910      | N          | 0.023247       | 2.32E-02     | TRUE         |
| 1     | 911      | K          | 0.853372       | 8.53E-01     | TRUE         |
| 1     | 912      | A          | 0.376269       | 3.76E-01     | TRUE         |
| 1     | 913      | I          | 0.411448       | 4.11E-01     | TRUE         |
| 1     | 914      | S          | 0.027482       | 2.75E-02     | TRUE         |
| 1     | 915      | Q          | 0.053932       | 5.39E-02     | TRUE         |
| 1     | 916      | I          | 0.957298       | 9.57E-01     | TRUE         |
| 1     | 917      | Q          | 0.040057       | 4.01E-02     | TRUE         |
| 1     | 918      | E          | 0.029313       | 2.93E-02     | TRUE         |
| 1     | 919      | S          | 0.056215       | 5.62E-02     | TRUE         |
| 1     | 920      | L          | 0.946281       | 9.46E-01     | TRUE         |
| 1     | 921      | T          | 0.030763       | 3.08E-02     | TRUE         |
| 1     | 922      | T          | 0.069401       | 6.94E-02     | TRUE         |
| 1     | 923      | T          | 0.188388       | 1.88E-01     | TRUE         |
| 1     | 924      | S          | 0.055941       | 5.59E-02     | TRUE         |

| seq # | position | amino acid | NetChop Predic | legacy score | scores equal |
|-------|----------|------------|----------------|--------------|--------------|
| 1     | 925      | T          | 0.619699       | 6.20E-01     | TRUE         |
| 1     | 926      | A          | 0.876172       | 8.76E-01     | TRUE         |
| 1     | 927      | L          | 0.975042       | 9.75E-01     | TRUE         |
| 1     | 928      | G          | 0.048388       | 4.84E-02     | TRUE         |
| 1     | 929      | K          | 0.260085       | 2.60E-01     | TRUE         |
| 1     | 930      | L          | 0.824919       | 8.25E-01     | TRUE         |
| 1     | 931      | Q          | 0.024016       | 2.40E-02     | TRUE         |
| 1     | 932      | D          | 0.033321       | 3.33E-02     | TRUE         |
| 1     | 933      | V          | 0.211061       | 2.11E-01     | TRUE         |
| 1     | 934      | V          | 0.333255       | 3.33E-01     | TRUE         |
| 1     | 935      | N          | 0.038346       | 3.83E-02     | TRUE         |
| 1     | 936      | Q          | 0.037196       | 3.72E-02     | TRUE         |
| 1     | 937      | N          | 0.390622       | 3.91E-01     | TRUE         |
| 1     | 938      | A          | 0.167218       | 1.67E-01     | TRUE         |
| 1     | 939      | Q          | 0.02954        | 2.95E-02     | TRUE         |
| 1     | 940      | A          | 0.458651       | 4.59E-01     | TRUE         |
| 1     | 941      | L          | 0.600474       | 6.00E-01     | TRUE         |
| 1     | 942      | N          | 0.029915       | 2.99E-02     | TRUE         |
| 1     | 943      | T          | 0.027802       | 2.78E-02     | TRUE         |
| 1     | 944      | L          | 0.644207       | 6.44E-01     | TRUE         |
| 1     | 945      | V          | 0.243592       | 2.44E-01     | TRUE         |
| 1     | 946      | K          | 0.966362       | 9.66E-01     | TRUE         |
| 1     | 947      | Q          | 0.19586        | 1.96E-01     | TRUE         |
| 1     | 948      | L          | 0.943025       | 9.43E-01     | TRUE         |
| 1     | 949      | S          | 0.02678        | 2.68E-02     | TRUE         |
| 1     | 950      | S          | 0.068149       | 6.81E-02     | TRUE         |
| 1     | 951      | N          | 0.042391       | 4.24E-02     | TRUE         |
| 1     | 952      | F          | 0.228361       | 2.28E-01     | TRUE         |
| 1     | 953      | G          | 0.031411       | 3.14E-02     | TRUE         |
| 1     | 954      | A          | 0.069086       | 6.91E-02     | TRUE         |
| 1     | 955      | I          | 0.803067       | 8.03E-01     | TRUE         |
| 1     | 956      | S          | 0.045024       | 4.50E-02     | TRUE         |
| 1     | 957      | S          | 0.052221       | 5.22E-02     | TRUE         |
| 1     | 958      | V          | 0.904941       | 9.05E-01     | TRUE         |
| 1     | 959      | L          | 0.490709       | 4.91E-01     | TRUE         |
| 1     | 960      | N          | 0.028867       | 2.89E-02     | TRUE         |
| 1     | 961      | D          | 0.028704       | 2.87E-02     | TRUE         |
| 1     | 962      | I          | 0.798926       | 7.99E-01     | TRUE         |
| 1     | 963      | L          | 0.418824       | 4.19E-01     | TRUE         |
| 1     | 964      | S          | 0.05145        | 5.15E-02     | TRUE         |
| 1     | 965      | R          | 0.753344       | 7.53E-01     | TRUE         |
| 1     | 966      | L          | 0.97061        | 9.71E-01     | TRUE         |
| 1     | 967      | D          | 0.026311       | 2.63E-02     | TRUE         |
| 1     | 968      | K          | 0.113252       | 1.13E-01     | TRUE         |

| seq # | position | amino acid | NetChop Predic | legacy score | scores equal |
|-------|----------|------------|----------------|--------------|--------------|
| 1     | 969      | V          | 0.447484       | 4.47E-01     | TRUE         |
| 1     | 970      | E          | 0.034525       | 3.45E-02     | TRUE         |
| 1     | 971      | A          | 0.213053       | 2.13E-01     | TRUE         |
| 1     | 972      | E          | 0.029859       | 2.99E-02     | TRUE         |
| 1     | 973      | V          | 0.969105       | 9.69E-01     | TRUE         |
| 1     | 974      | Q          | 0.026643       | 2.66E-02     | TRUE         |
| 1     | 975      | I          | 0.271561       | 2.72E-01     | TRUE         |
| 1     | 976      | D          | 0.024025       | 2.40E-02     | TRUE         |
| 1     | 977      | R          | 0.658108       | 6.58E-01     | TRUE         |
| 1     | 978      | L          | 0.500008       | 5.00E-01     | TRUE         |
| 1     | 979      | I          | 0.416883       | 4.17E-01     | TRUE         |
| 1     | 980      | T          | 0.028135       | 2.81E-02     | TRUE         |
| 1     | 981      | G          | 0.117726       | 1.18E-01     | TRUE         |
| 1     | 982      | R          | 0.663197       | 6.63E-01     | TRUE         |
| 1     | 983      | L          | 0.921652       | 9.22E-01     | TRUE         |
| 1     | 984      | Q          | 0.041021       | 4.10E-02     | TRUE         |
| 1     | 985      | S          | 0.034682       | 3.47E-02     | TRUE         |
| 1     | 986      | L          | 0.891839       | 8.92E-01     | TRUE         |
| 1     | 987      | Q          | 0.02913        | 2.91E-02     | TRUE         |
| 1     | 988      | T          | 0.048198       | 4.82E-02     | TRUE         |
| 1     | 989      | Y          | 0.962117       | 9.62E-01     | TRUE         |
| 1     | 990      | V          | 0.748401       | 7.48E-01     | TRUE         |
| 1     | 991      | T          | 0.075954       | 7.60E-02     | TRUE         |
| 1     | 992      | Q          | 0.09213        | 9.21E-02     | TRUE         |
| 1     | 993      | Q          | 0.238855       | 2.39E-01     | TRUE         |
| 1     | 994      | L          | 0.83313        | 8.33E-01     | TRUE         |
| 1     | 995      | I          | 0.846957       | 8.47E-01     | TRUE         |
| 1     | 996      | R          | 0.481206       | 4.81E-01     | TRUE         |
| 1     | 997      | A          | 0.386661       | 3.87E-01     | TRUE         |
| 1     | 998      | A          | 0.066948       | 6.69E-02     | TRUE         |
| 1     | 999      | E          | 0.023338       | 2.33E-02     | TRUE         |
| 1     | 1000     | I          | 0.768889       | 7.69E-01     | TRUE         |
| 1     | 1001     | R          | 0.141956       | 1.42E-01     | TRUE         |
| 1     | 1002     | A          | 0.11725        | 1.17E-01     | TRUE         |
| 1     | 1003     | S          | 0.024755       | 2.48E-02     | TRUE         |
| 1     | 1004     | A          | 0.471833       | 4.72E-01     | TRUE         |
| 1     | 1005     | N          | 0.023983       | 2.40E-02     | TRUE         |
| 1     | 1006     | L          | 0.964218       | 9.64E-01     | TRUE         |
| 1     | 1007     | A          | 0.121699       | 1.22E-01     | TRUE         |
| 1     | 1008     | A          | 0.113098       | 1.13E-01     | TRUE         |
| 1     | 1009     | T          | 0.039329       | 3.93E-02     | TRUE         |
| 1     | 1010     | K          | 0.696234       | 6.96E-01     | TRUE         |
| 1     | 1011     | M          | 0.959289       | 9.59E-01     | TRUE         |
| 1     | 1012     | S          | 0.038261       | 3.83E-02     | TRUE         |

| seq # | position | amino acid | NetChop Predic | legacy score | scores equal |
|-------|----------|------------|----------------|--------------|--------------|
| 1     | 1013     | E          | 0.043905       | 4.39E-02     | TRUE         |
| 1     | 1014     | C          | 0.025332       | 2.53E-02     | TRUE         |
| 1     | 1015     | V          | 0.263389       | 2.63E-01     | TRUE         |
| 1     | 1016     | L          | 0.54987        | 5.50E-01     | TRUE         |
| 1     | 1017     | G          | 0.035102       | 3.51E-02     | TRUE         |
| 1     | 1018     | Q          | 0.052213       | 5.22E-02     | TRUE         |
| 1     | 1019     | S          | 0.041658       | 4.17E-02     | TRUE         |
| 1     | 1020     | K          | 0.419425       | 4.19E-01     | TRUE         |
| 1     | 1021     | R          | 0.072851       | 7.29E-02     | TRUE         |
| 1     | 1022     | V          | 0.925498       | 9.25E-01     | TRUE         |
| 1     | 1023     | D          | 0.028547       | 2.85E-02     | TRUE         |
| 1     | 1024     | F          | 0.290255       | 2.90E-01     | TRUE         |
| 1     | 1025     | C          | 0.022726       | 2.27E-02     | TRUE         |
| 1     | 1026     | G          | 0.033717       | 3.37E-02     | TRUE         |
| 1     | 1027     | K          | 0.46223        | 4.62E-01     | TRUE         |
| 1     | 1028     | G          | 0.280733       | 2.81E-01     | TRUE         |
| 1     | 1029     | Y          | 0.752882       | 7.53E-01     | TRUE         |
| 1     | 1030     | H          | 0.057232       | 5.72E-02     | TRUE         |
| 1     | 1031     | L          | 0.951797       | 9.52E-01     | TRUE         |
| 1     | 1032     | M          | 0.57062        | 5.71E-01     | TRUE         |
| 1     | 1033     | S          | 0.035124       | 3.51E-02     | TRUE         |
| 1     | 1034     | F          | 0.464732       | 4.65E-01     | TRUE         |
| 1     | 1035     | P          | 0.034905       | 3.49E-02     | TRUE         |
| 1     | 1036     | Q          | 0.161931       | 1.62E-01     | TRUE         |
| 1     | 1037     | A          | 0.067245       | 6.72E-02     | TRUE         |
| 1     | 1038     | A          | 0.046386       | 4.64E-02     | TRUE         |
| 1     | 1039     | P          | 0.048829       | 4.88E-02     | TRUE         |
| 1     | 1040     | H          | 0.095767       | 9.58E-02     | TRUE         |
| 1     | 1041     | G          | 0.026512       | 2.65E-02     | TRUE         |
| 1     | 1042     | V          | 0.691118       | 6.91E-01     | TRUE         |
| 1     | 1043     | V          | 0.428755       | 4.29E-01     | TRUE         |
| 1     | 1044     | F          | 0.39586        | 3.96E-01     | TRUE         |
| 1     | 1045     | L          | 0.906343       | 9.06E-01     | TRUE         |
| 1     | 1046     | H          | 0.768182       | 7.68E-01     | TRUE         |
| 1     | 1047     | V          | 0.891233       | 8.91E-01     | TRUE         |
| 1     | 1048     | T          | 0.067518       | 6.75E-02     | TRUE         |
| 1     | 1049     | Y          | 0.975435       | 9.75E-01     | TRUE         |
| 1     | 1050     | V          | 0.831125       | 8.31E-01     | TRUE         |
| 1     | 1051     | P          | 0.118875       | 1.19E-01     | TRUE         |
| 1     | 1052     | S          | 0.103419       | 1.03E-01     | TRUE         |
| 1     | 1053     | Q          | 0.33477        | 3.35E-01     | TRUE         |
| 1     | 1054     | E          | 0.029356       | 2.94E-02     | TRUE         |
| 1     | 1055     | R          | 0.934669       | 9.35E-01     | TRUE         |
| 1     | 1056     | N          | 0.044138       | 4.41E-02     | TRUE         |

| seq # | position | amino acid | NetChop Predict | legacy score | scores equal |
|-------|----------|------------|-----------------|--------------|--------------|
| 1     | 1057     | F          | 0.266788        | 2.67E-01     | TRUE         |
| 1     | 1058     | T          | 0.033806        | 3.38E-02     | TRUE         |
| 1     | 1059     | T          | 0.125051        | 1.25E-01     | TRUE         |
| 1     | 1060     | A          | 0.396717        | 3.97E-01     | TRUE         |
| 1     | 1061     | P          | 0.586716        | 5.87E-01     | TRUE         |
| 1     | 1062     | A          | 0.717699        | 7.18E-01     | TRUE         |
| 1     | 1063     | I          | 0.363895        | 3.64E-01     | TRUE         |
| 1     | 1064     | C          | 0.029536        | 2.95E-02     | TRUE         |
| 1     | 1065     | H          | 0.114708        | 1.15E-01     | TRUE         |
| 1     | 1066     | E          | 0.029617        | 2.96E-02     | TRUE         |
| 1     | 1067     | G          | 0.135454        | 1.35E-01     | TRUE         |
| 1     | 1068     | K          | 0.858847        | 8.59E-01     | TRUE         |
| 1     | 1069     | A          | 0.100562        | 1.01E-01     | TRUE         |
| 1     | 1070     | Y          | 0.252364        | 2.52E-01     | TRUE         |
| 1     | 1071     | F          | 0.165143        | 1.65E-01     | TRUE         |
| 1     | 1072     | P          | 0.02356         | 2.36E-02     | TRUE         |
| 1     | 1073     | R          | 0.13628         | 1.36E-01     | TRUE         |
| 1     | 1074     | E          | 0.024663        | 2.47E-02     | TRUE         |
| 1     | 1075     | G          | 0.025334        | 2.53E-02     | TRUE         |
| 1     | 1076     | V          | 0.126397        | 1.26E-01     | TRUE         |
| 1     | 1077     | F          | 0.860201        | 8.60E-01     | TRUE         |
| 1     | 1078     | V          | 0.164595        | 1.65E-01     | TRUE         |
| 1     | 1079     | F          | 0.967898        | 9.68E-01     | TRUE         |
| 1     | 1080     | N          | 0.051682        | 5.17E-02     | TRUE         |
| 1     | 1081     | G          | 0.030304        | 3.03E-02     | TRUE         |
| 1     | 1082     | T          | 0.028272        | 2.83E-02     | TRUE         |
| 1     | 1083     | S          | 0.039627        | 3.96E-02     | TRUE         |
| 1     | 1084     | W          | 0.873003        | 8.73E-01     | TRUE         |
| 1     | 1085     | F          | 0.729527        | 7.30E-01     | TRUE         |
| 1     | 1086     | I          | 0.372711        | 3.73E-01     | TRUE         |
| 1     | 1087     | T          | 0.032544        | 3.25E-02     | TRUE         |
| 1     | 1088     | Q          | 0.091586        | 9.16E-02     | TRUE         |
| 1     | 1089     | R          | 0.942443        | 9.42E-01     | TRUE         |
| 1     | 1090     | N          | 0.364672        | 3.65E-01     | TRUE         |
| 1     | 1091     | F          | 0.617906        | 6.18E-01     | TRUE         |
| 1     | 1092     | F          | 0.092193        | 9.22E-02     | TRUE         |
| 1     | 1093     | S          | 0.02257         | 2.26E-02     | TRUE         |
| 1     | 1094     | P          | 0.033203        | 3.32E-02     | TRUE         |
| 1     | 1095     | Q          | 0.065053        | 6.51E-02     | TRUE         |
| 1     | 1096     | I          | 0.885718        | 8.86E-01     | TRUE         |
| 1     | 1097     | I          | 0.284734        | 2.85E-01     | TRUE         |
| 1     | 1098     | T          | 0.030961        | 3.10E-02     | TRUE         |
| 1     | 1099     | T          | 0.454893        | 4.55E-01     | TRUE         |
| 1     | 1100     | D          | 0.098122        | 9.81E-02     | TRUE         |

| seq # | position | amino acid | NetChop Predic | legacy score | scores equal |
|-------|----------|------------|----------------|--------------|--------------|
| 1     | 1101     | N          | 0.238006       | 2.38E-01     | TRUE         |
| 1     | 1102     | T          | 0.028133       | 2.81E-02     | TRUE         |
| 1     | 1103     | F          | 0.75359        | 7.54E-01     | TRUE         |
| 1     | 1104     | V          | 0.756614       | 7.57E-01     | TRUE         |
| 1     | 1105     | S          | 0.138216       | 1.38E-01     | TRUE         |
| 1     | 1106     | G          | 0.293253       | 2.93E-01     | TRUE         |
| 1     | 1107     | N          | 0.029876       | 2.99E-02     | TRUE         |
| 1     | 1108     | C          | 0.024077       | 2.41E-02     | TRUE         |
| 1     | 1109     | D          | 0.023624       | 2.36E-02     | TRUE         |
| 1     | 1110     | V          | 0.21595        | 2.16E-01     | TRUE         |
| 1     | 1111     | V          | 0.095821       | 9.58E-02     | TRUE         |
| 1     | 1112     | I          | 0.058928       | 5.89E-02     | TRUE         |
| 1     | 1113     | G          | 0.024097       | 2.41E-02     | TRUE         |
| 1     | 1114     | I          | 0.182334       | 1.82E-01     | TRUE         |
| 1     | 1115     | I          | 0.123132       | 1.23E-01     | TRUE         |
| 1     | 1116     | N          | 0.030843       | 3.08E-02     | TRUE         |
| 1     | 1117     | N          | 0.063526       | 6.35E-02     | TRUE         |
| 1     | 1118     | T          | 0.169801       | 1.70E-01     | TRUE         |
| 1     | 1119     | V          | 0.944194       | 9.44E-01     | TRUE         |
| 1     | 1120     | Y          | 0.948128       | 9.48E-01     | TRUE         |
| 1     | 1121     | D          | 0.162761       | 1.63E-01     | TRUE         |
| 1     | 1122     | P          | 0.046338       | 4.63E-02     | TRUE         |
| 1     | 1123     | L          | 0.839742       | 8.40E-01     | TRUE         |
| 1     | 1124     | Q          | 0.024294       | 2.43E-02     | TRUE         |
| 1     | 1125     | P          | 0.052431       | 5.24E-02     | TRUE         |
| 1     | 1126     | E          | 0.060839       | 6.08E-02     | TRUE         |
| 1     | 1127     | L          | 0.97446        | 9.74E-01     | TRUE         |
| 1     | 1128     | D          | 0.045904       | 4.59E-02     | TRUE         |
| 1     | 1129     | S          | 0.124699       | 1.25E-01     | TRUE         |
| 1     | 1130     | F          | 0.865602       | 8.66E-01     | TRUE         |
| 1     | 1131     | K          | 0.262564       | 2.63E-01     | TRUE         |
| 1     | 1132     | E          | 0.243921       | 2.44E-01     | TRUE         |
| 1     | 1133     | E          | 0.027792       | 2.78E-02     | TRUE         |
| 1     | 1134     | L          | 0.826679       | 8.27E-01     | TRUE         |
| 1     | 1135     | D          | 0.026734       | 2.67E-02     | TRUE         |
| 1     | 1136     | K          | 0.684596       | 6.85E-01     | TRUE         |
| 1     | 1137     | Y          | 0.937522       | 9.38E-01     | TRUE         |
| 1     | 1138     | F          | 0.33136        | 3.31E-01     | TRUE         |
| 1     | 1139     | K          | 0.599992       | 6.00E-01     | TRUE         |
| 1     | 1140     | N          | 0.290353       | 2.90E-01     | TRUE         |
| 1     | 1141     | H          | 0.456622       | 4.57E-01     | TRUE         |
| 1     | 1142     | T          | 0.091321       | 9.13E-02     | TRUE         |
| 1     | 1143     | S          | 0.10854        | 1.09E-01     | TRUE         |
| 1     | 1144     | P          | 0.751396       | 7.51E-01     | TRUE         |

| seq # | position | amino acid | NetChop Predic | legacy score | scores equal |
|-------|----------|------------|----------------|--------------|--------------|
| 1     | 1145     | D          | 0.036278       | 3.63E-02     | TRUE         |
| 1     | 1146     | V          | 0.878126       | 8.78E-01     | TRUE         |
| 1     | 1147     | D          | 0.025611       | 2.56E-02     | TRUE         |
| 1     | 1148     | L          | 0.643203       | 6.43E-01     | TRUE         |
| 1     | 1149     | G          | 0.069166       | 6.92E-02     | TRUE         |
| 1     | 1150     | D          | 0.03142        | 3.14E-02     | TRUE         |
| 1     | 1151     | I          | 0.690329       | 6.90E-01     | TRUE         |
| 1     | 1152     | S          | 0.023405       | 2.34E-02     | TRUE         |
| 1     | 1153     | G          | 0.041312       | 4.13E-02     | TRUE         |
| 1     | 1154     | I          | 0.28429        | 2.84E-01     | TRUE         |
| 1     | 1155     | N          | 0.039967       | 4.00E-02     | TRUE         |
| 1     | 1156     | A          | 0.060691       | 6.07E-02     | TRUE         |
| 1     | 1157     | S          | 0.029025       | 2.90E-02     | TRUE         |
| 1     | 1158     | V          | 0.738783       | 7.39E-01     | TRUE         |
| 1     | 1159     | V          | 0.628456       | 6.28E-01     | TRUE         |
| 1     | 1160     | N          | 0.034644       | 3.46E-02     | TRUE         |
| 1     | 1161     | I          | 0.54906        | 5.49E-01     | TRUE         |
| 1     | 1162     | Q          | 0.031321       | 3.13E-02     | TRUE         |
| 1     | 1163     | K          | 0.949286       | 9.49E-01     | TRUE         |
| 1     | 1164     | E          | 0.035373       | 3.54E-02     | TRUE         |
| 1     | 1165     | I          | 0.707235       | 7.07E-01     | TRUE         |
| 1     | 1166     | D          | 0.024403       | 2.44E-02     | TRUE         |
| 1     | 1167     | R          | 0.046798       | 4.68E-02     | TRUE         |
| 1     | 1168     | L          | 0.392924       | 3.93E-01     | TRUE         |
| 1     | 1169     | N          | 0.027963       | 2.80E-02     | TRUE         |
| 1     | 1170     | E          | 0.022482       | 2.25E-02     | TRUE         |
| 1     | 1171     | V          | 0.956933       | 9.57E-01     | TRUE         |
| 1     | 1172     | A          | 0.271839       | 2.72E-01     | TRUE         |
| 1     | 1173     | K          | 0.348497       | 3.48E-01     | TRUE         |
| 1     | 1174     | N          | 0.090368       | 9.04E-02     | TRUE         |
| 1     | 1175     | L          | 0.9655         | 9.66E-01     | TRUE         |
| 1     | 1176     | N          | 0.025771       | 2.58E-02     | TRUE         |
| 1     | 1177     | E          | 0.025344       | 2.53E-02     | TRUE         |
| 1     | 1178     | S          | 0.091616       | 9.16E-02     | TRUE         |
| 1     | 1179     | L          | 0.725554       | 7.26E-01     | TRUE         |
| 1     | 1180     | I          | 0.3904         | 3.90E-01     | TRUE         |
| 1     | 1181     | D          | 0.028871       | 2.89E-02     | TRUE         |
| 1     | 1182     | L          | 0.945978       | 9.46E-01     | TRUE         |
| 1     | 1183     | Q          | 0.028869       | 2.89E-02     | TRUE         |
| 1     | 1184     | E          | 0.032809       | 3.28E-02     | TRUE         |
| 1     | 1185     | L          | 0.712329       | 7.12E-01     | TRUE         |
| 1     | 1186     | G          | 0.029705       | 2.97E-02     | TRUE         |
| 1     | 1187     | K          | 0.523584       | 5.24E-01     | TRUE         |
| 1     | 1188     | Y          | 0.552839       | 5.53E-01     | TRUE         |

| seq # | position | amino acid | NetChop Predic | legacy score | scores equal |
|-------|----------|------------|----------------|--------------|--------------|
| 1     | 1189     | E          | 0.025313       | 2.53E-02     | TRUE         |
| 1     | 1190     | Q          | 0.057362       | 5.74E-02     | TRUE         |
| 1     | 1191     | Y          | 0.538812       | 5.39E-01     | TRUE         |
| 1     | 1192     | I          | 0.165847       | 1.66E-01     | TRUE         |
| 1     | 1193     | K          | 0.056961       | 5.70E-02     | TRUE         |
| 1     | 1194     | W          | 0.447654       | 4.48E-01     | TRUE         |
| 1     | 1195     | P          | 0.026251       | 2.63E-02     | TRUE         |
| 1     | 1196     | W          | 0.412339       | 4.12E-01     | TRUE         |
| 1     | 1197     | Y          | 0.206132       | 2.06E-01     | TRUE         |
| 1     | 1198     | V          | 0.829028       | 8.29E-01     | TRUE         |
| 1     | 1199     | W          | 0.88866        | 8.89E-01     | TRUE         |
| 1     | 1200     | L          | 0.81462        | 8.15E-01     | TRUE         |
| 1     | 1201     | G          | 0.072581       | 7.26E-02     | TRUE         |
| 1     | 1202     | F          | 0.863428       | 8.63E-01     | TRUE         |
| 1     | 1203     | I          | 0.055383       | 5.54E-02     | TRUE         |
| 1     | 1204     | A          | 0.038881       | 3.89E-02     | TRUE         |
| 1     | 1205     | G          | 0.107165       | 1.07E-01     | TRUE         |
| 1     | 1206     | L          | 0.262228       | 2.62E-01     | TRUE         |
| 1     | 1207     | I          | 0.161537       | 1.62E-01     | TRUE         |
| 1     | 1208     | A          | 0.027828       | 2.78E-02     | TRUE         |
| 1     | 1209     | I          | 0.090463       | 9.05E-02     | TRUE         |
| 1     | 1210     | V          | 0.214371       | 2.14E-01     | TRUE         |
| 1     | 1211     | M          | 0.125271       | 1.25E-01     | TRUE         |
| 1     | 1212     | V          | 0.472139       | 4.72E-01     | TRUE         |
| 1     | 1213     | T          | 0.070452       | 7.05E-02     | TRUE         |
| 1     | 1214     | I          | 0.77209        | 7.72E-01     | TRUE         |
| 1     | 1215     | L          | 0.866205       | 8.66E-01     | TRUE         |
| 1     | 1216     | L          | 0.934318       | 9.34E-01     | TRUE         |
| 1     | 1217     | C          | 0.045495       | 4.55E-02     | TRUE         |
| 1     | 1218     | C          | 0.046086       | 4.61E-02     | TRUE         |
| 1     | 1219     | M          | 0.407928       | 4.08E-01     | TRUE         |
| 1     | 1220     | T          | 0.098008       | 9.80E-02     | TRUE         |
| 1     | 1221     | S          | 0.156547       | 1.57E-01     | TRUE         |
| 1     | 1222     | C          | 0.079352       | 0.079352     | TRUE         |
| 1     | 1223     | C          | 0.033914       | 0.033914     | TRUE         |
| 1     | 1224     | S          | 0.027149       | 0.027149     | TRUE         |
| 1     | 1225     | C          | 0.025507       | 0.025507     | TRUE         |
| 1     | 1226     | L          | 0.829758       | 0.829758     | TRUE         |
| 1     | 1227     | K          | 0.709149       | 0.709149     | TRUE         |
| 1     | 1228     | G          | 0.059028       | 0.059028     | TRUE         |
| 1     | 1229     | A          | 0.039098       | 0.039098     | TRUE         |
| 1     | 1230     | C          | 0.023379       | 0.023379     | TRUE         |
| 1     | 1231     | S          | 0.025706       | 0.025706     | TRUE         |
| 1     | 1232     | C          | 0.032775       | 0.032775     | TRUE         |

| seq # | position | amino acid | NetChop Predict | legacy score | scores equal |
|-------|----------|------------|-----------------|--------------|--------------|
| 1     | 1233     | G          | 0.318992        | 0.318992     | TRUE         |
| 1     | 1234     | S          | 0.034369        | 0.034369     | TRUE         |
| 1     | 1235     | C          | 0.034304        | 0.034304     | TRUE         |
| 1     | 1236     | C          | 0.028926        | 0.028926     | TRUE         |
| 1     | 1237     | K          | 0.805768        | 0.805768     | TRUE         |
| 1     | 1238     | F          | 0.921571        | 0.921571     | TRUE         |
| 1     | 1239     | D          | 0.023119        | 0.023119     | TRUE         |
| 1     | 1240     | E          | 0.022167        | 0.022167     | TRUE         |
| 1     | 1241     | D          | 0.025901        | 0.025901     | TRUE         |
| 1     | 1242     | D          | 0.024311        | 0.024311     | TRUE         |
| 1     | 1243     | S          | 0.022436        | 0.022436     | TRUE         |
| 1     | 1244     | E          | 0.023009        | 0.023009     | TRUE         |
| 1     | 1245     | P          | 0.036752        | 0.036752     | TRUE         |
| 1     | 1246     | V          | 0.274641        | 0.274641     | TRUE         |
| 1     | 1247     | L          | 0.950554        | 0.950554     | TRUE         |
| 1     | 1248     | K          | 0.310251        | 0.310251     | TRUE         |
| 1     | 1249     | G          | 0.152658        | 0.152658     | TRUE         |
| 1     | 1250     | V          | 0.623653        | 0.623653     | TRUE         |
| 1     | 1251     | K          | 0.357531        | 0.357531     | TRUE         |
| 1     | 1252     | L          | 0.97679         | 0.97679      | TRUE         |
| 1     | 1253     | H          | 0.386486        | 0.386486     | TRUE         |
| 1     | 1254     | Y          | 0.978325        | 0.978325     | TRUE         |
| 1     | 1255     | T          | 0.118749        | 0.118749     | TRUE         |

| seq id | peptide      | start | end | peptide length | allele       | peptide index | NetCL Predict | NetCL Rescale | NetCL c term | NetCL TAP to NetCL Predict | NetCL Support | legacy predict | legacy rescale | legacy c term | legacy tap | legacy predict | equal predict | equal rescale | equal c term | equal tap | equal predictions | score |      |
|--------|--------------|-------|-----|----------------|--------------|---------------|---------------|---------------|--------------|----------------------------|---------------|----------------|----------------|---------------|------------|----------------|---------------|---------------|--------------|-----------|-------------------|-------|------|
| 1      | IFPLFLPT     | 1     | 9   | 9              | 9HIA-A*02:01 | 1             | 0.0729        | 0.1744        | 0.0118       | -0.444                     | 0.0549        | 0.0729         | 0.1744         | 0.0118        | -0.444     | 0.0549         | TRUE          | TRUE          | TRUE         | TRUE      | TRUE              | TRUE  |      |
| 1      | IFPLFLPT     | 10    | 20  | 11             | 9HIA-A*02:01 | 2             | 0.2018        | 0.4824        | 0.0891       | 1.138                      | 0.0891        | 0.2018         | 0.4824         | 0.0891        | 1.138      | 0.0891         | TRUE          | TRUE          | TRUE         | TRUE      | TRUE              | TRUE  |      |
| 1      | IFLFLTLT     | 3     | 11  | 9HIA-A*02:01   | 3            | 0.0342        | 0.0819        | 0.0122        | -0.602       | 0.0701                     | 0.0122        | 0.0342         | 0.0819         | 0.0122        | -0.602     | 0.0701         | TRUE          | TRUE          | TRUE         | TRUE      | TRUE              | TRUE  |      |
| 1      | IFLFLTLT     | 4     | 12  | 9HIA-A*02:01   | 4            | 0.2806        | 0.6715        | 0.0702        | -2.254       | 0.0629                     | 0.0702        | 0.2806         | 0.6715         | 0.0702        | -2.254     | 0.0629         | TRUE          | TRUE          | TRUE         | TRUE      | TRUE              | TRUE  |      |
| 1      | IFLFLTSG     | 13    | 13  | 9HIA-A*02:01   | 13           | 0.0813        | 0.1942        | 0.0117        | -0.813       | 0.0117                     | 0.0813        | 0.1942         | 0.0117         | -0.813        | 0.0117     | 0.0813         | TRUE          | TRUE          | TRUE         | TRUE      | TRUE              | TRUE  |      |
| 1      | IFLFLTSGS    | 6     | 14  | 9HIA-A*02:01   | 6            | 0.046         | 0.1101        | 0.0208        | -2.008       | 0.0128                     | 0.046         | 0.1101         | 0.0208         | -2.008        | 0.0128     | 0.046          | TRUE          | TRUE          | TRUE         | TRUE      | TRUE              | TRUE  |      |
| 1      | IFLTLTSGSD   | 7     | 15  | 9HIA-A*02:01   | 7            | 0.0777        | 0.186         | 0.0634        | -0.179       | 0.0101                     | 0.0777        | 0.186          | 0.0634         | -0.179        | 0.0101     | 0.0777         | TRUE          | TRUE          | TRUE         | TRUE      | TRUE              | TRUE  |      |
| 1      | IFLTLTSGSD   | 16    | 18  | 9HIA-A*02:01   | 18           | 0.0706        | 0.169         | 0.0739        | -0.873       | 0.0143                     | 0.0706        | 0.169          | 0.0739         | -0.873        | 0.0143     | 0.0706         | TRUE          | TRUE          | TRUE         | TRUE      | TRUE              | TRUE  |      |
| 1      | IFLTLTSGSD   | 9     | 17  | 9HIA-A*02:01   | 9            | 0.0777        | 0.176         | 0.0778        | -1.805       | 0.0974                     | 0.0777        | 0.176          | 0.0778         | -1.805        | 0.0974     | 0.0777         | TRUE          | TRUE          | TRUE         | TRUE      | TRUE              | TRUE  |      |
| 1      | ITLGSGLDR    | 10    | 18  | 9HIA-A*02:01   | 10           | 0.0391        | 0.0936        | 0.0684        | 1.473        | 0.2525                     | 0.0391        | 0.0936         | 0.0684         | 1.473         | 0.2525     | 0.0391         | TRUE          | TRUE          | TRUE         | TRUE      | TRUE              | TRUE  |      |
| 1      | ITLGSGLDR    | 11    | 19  | 9HIA-A*02:01   | 11           | 0.0285        | 0.0634        | 0.0801        | -0.081       | 0.0008                     | 0.0285        | 0.0634         | 0.0801         | -0.081        | 0.0008     | 0.0285         | TRUE          | TRUE          | TRUE         | TRUE      | TRUE              | TRUE  |      |
| 1      | ITLGSGLDR    | 20    | 20  | 9HIA-A*02:01   | 20           | 0.0222        | 0.0531        | 0.0383        | 0.913        | 0.0103                     | 0.0222        | 0.0531         | 0.0383         | 0.913         | 0.0103     | 0.0222         | TRUE          | TRUE          | TRUE         | TRUE      | TRUE              | TRUE  |      |
| 1      | ITLGSGLDRCTT | 13    | 21  | 9HIA-A*02:01   | 13           | 0.0183        | 0.0437        | 0.0319        | -0.966       | 0.0002                     | 0.0183        | 0.0437         | 0.0319         | -0.966        | 0.0002     | 0.0183         | TRUE          | TRUE          | TRUE         | TRUE      | TRUE              | TRUE  |      |
| 1      | ITLGSGLDRCTT | 14    | 22  | 9HIA-A*02:01   | 14           | 0.0222        | 0.0532        | 0.0803        | 2.268        | 0.3136                     | 0.0222        | 0.0532         | 0.0803         | 2.268         | 0.3136     | 0.0222         | TRUE          | TRUE          | TRUE         | TRUE      | TRUE              | TRUE  |      |
| 1      | ITLGSGLDRCTT | 15    | 23  | 9HIA-A*02:01   | 15           | 0.047         | 0.1124        | 0.0126        | -2.34        | 0.0026                     | 0.047         | 0.1124         | 0.0126         | -2.34         | 0.0026     | 0.047          | TRUE          | TRUE          | TRUE         | TRUE      | TRUE              | TRUE  |      |
| 1      | ITLGSGLDRCTT | 16    | 24  | 9HIA-A*02:01   | 16           | 0.017         | 0.0407        | 0.0174        | -2.309       | -0.0672                    | 0.017         | 0.0407         | 0.0174         | -2.309        | -0.0672    | 0.017          | TRUE          | TRUE          | TRUE         | TRUE      | TRUE              | TRUE  |      |
| 1      | ITLGSGLDRCTT | 17    | 25  | 9HIA-A*02:01   | 17           | 0.0231        | 0.0553        | 0.0857        | 0.262        | 0.1969                     | 0.0231        | 0.0553         | 0.0857         | 0.262         | 0.1969     | 0.0231         | TRUE          | TRUE          | TRUE         | TRUE      | TRUE              | TRUE  |      |
| 1      | ITLGSGLDRCTT | 18    | 26  | 9HIA-A*02:01   | 18           | 0.0234        | 0.0538        | 0.0234        | -0.039       | 0.0046                     | 0.0234        | 0.0538         | 0.0234         | -0.039        | 0.0046     | 0.0234         | TRUE          | TRUE          | TRUE         | TRUE      | TRUE              | TRUE  |      |
| 1      | ITLGSGLDRCTT | 19    | 27  | 9HIA-A*02:01   | 19           | 0.0289        | 0.0691        | 0.0318        | -0.502       | 0.0713                     | 0.0289        | 0.0691         | 0.0318         | -0.502        | 0.0713     | 0.0289         | TRUE          | TRUE          | TRUE         | TRUE      | TRUE              | TRUE  |      |
| 1      | ITLGSGLDRCTT | 20    | 28  | 9HIA-A*02:01   | 20           | 0.0926        | 0.2215        | 0.044         | 0.167        | 0.2365                     | 0.0926        | 0.2215         | 0.044          | 0.167         | 0.2365     | 0.0926         | TRUE          | TRUE          | TRUE         | TRUE      | TRUE              | TRUE  |      |
| 1      | ITLGSGLDRCTT | 21    | 29  | 9HIA-A*02:01   | 21           | 0.0297        | 0.0711        | 0.0826        | -1.335       | 0.0107                     | 0.0297        | 0.0711         | 0.0826         | -1.335        | 0.0107     | 0.0297         | TRUE          | TRUE          | TRUE         | TRUE      | TRUE              | TRUE  |      |
| 1      | ITLGSGLDRCTT | 22    | 30  | 9HIA-A*02:01   | 22           | 0.0185        | 0.0444        | 0.0709        | 2.356        | 0.2703                     | 0.0185        | 0.0444         | 0.0709         | 2.356         | 0.2703     | 0.0185         | TRUE          | TRUE          | TRUE         | TRUE      | TRUE              | TRUE  |      |
| 1      | ITLGSGLDRCTT | 23    | 31  | 9HIA-A*02:01   | 23           | 0.0173        | 0.0414        | 0.0178        | -1.356       | -0.0237                    | 0.0173        | 0.0414         | 0.0178         | -1.356        | -0.0237    | 0.0173         | TRUE          | TRUE          | TRUE         | TRUE      | TRUE              | TRUE  |      |
| 1      | ITLGSGLDRCTT | 24    | 32  | 9HIA-A*02:01   | 24           | 0.0335        | 0.0802        | 0.099         | -0.454       | 0.1624                     | 0.0335        | 0.0802         | 0.099          | -0.454        | 0.1624     | 0.0335         | TRUE          | TRUE          | TRUE         | TRUE      | TRUE              | TRUE  |      |
| 1      | ITLGSGLDRCTT | 25    | 33  | 9HIA-A*02:01   | 25           | 0.0242        | 0.0579        | 0.011         | -0.52        | 0.1385                     | 0.0242        | 0.0579         | 0.011          | -0.52         | 0.1385     | 0.0242         | TRUE          | TRUE          | TRUE         | TRUE      | TRUE              | TRUE  |      |
| 1      | ITLGSGLDRCTT | 26    | 34  | 9HIA-A*02:01   | 26           | 0.0359        | 0.086         | 0.0515        | -0.608       | 0.1328                     | 0.0359        | 0.086          | 0.0515         | -0.608        | 0.1328     | 0.0359         | TRUE          | TRUE          | TRUE         | TRUE      | TRUE              | TRUE  |      |
| 1      | ITLGSGLDRCTT | 27    | 35  | 9HIA-A*02:01   | 27           | 0.0205        | 0.0491        | 0.2905        | -2.549       | -0.0475                    | 0.0205        | 0.0491         | 0.2905         | -2.549        | -0.0475    | 0.0205         | TRUE          | TRUE          | TRUE         | TRUE      | TRUE              | TRUE  |      |
| 1      | ITLGSGLDRCTT | 28    | 36  | 9HIA-A*02:01   | 28           | 0.0171        | 0.041         | 0.0171        | -0.537       | 0.0017                     | 0.0171        | 0.041          | 0.0171         | -0.537        | 0.0017     | 0.0171         | TRUE          | TRUE          | TRUE         | TRUE      | TRUE              | TRUE  |      |
| 1      | ITLGSGLDRCTT | 29    | 37  | 9HIA-A*02:01   | 29           | 0.0239        | 0.0573        | 0.0903        | 0.425        | 0.2721                     | 0.0239        | 0.0573         | 0.0903         | 0.425         | 0.2721     | 0.0239         | TRUE          | TRUE          | TRUE         | TRUE      | TRUE              | TRUE  |      |
| 1      | ITLGSGLDRCTT | 30    | 38  | 9HIA-A*02:01   | 30           | 0.0429        | 0.1027        | 0.0729        | 1.552        | 0.2512                     | 0.0429        | 0.1027         | 0.0729         | 1.552         | 0.2512     | 0.0429         | TRUE          | TRUE          | TRUE         | TRUE      | TRUE              | TRUE  |      |
| 1      | ITLGSGLDRCTT | 31    | 39  | 9HIA-A*02:01   | 31           | 0.0241        | 0.0576        | 0.0824        | -1.363       | 0.0018                     | 0.0241        | 0.0576         | 0.0824         | -1.363        | 0.0018     | 0.0241         | TRUE          | TRUE          | TRUE         | TRUE      | TRUE              | TRUE  |      |
| 1      | ITLGSGLDRCTT | 32    | 40  | 9HIA-A*02:01   | 32           | 0.0051        | 0.012         | 0.0051        | -0.389       | 0.0007                     | 0.0051        | 0.012          | 0.0051         | -0.389        | 0.0007     | 0.0051         | TRUE          | TRUE          | TRUE         | TRUE      | TRUE              | TRUE  |      |
| 1      | ITLGSGLDRCTT | 33    | 41  | 9HIA-A*02:01   | 33           | 0.0209        | 0.0501        | 0.7345        | 2.759        | 0.2862                     | 0.0209        | 0.0501         | 0.7345         | 2.759         | 0.2862     | 0.0209         | TRUE          | TRUE          | TRUE         | TRUE      | TRUE              | TRUE  |      |
| 1      | ITLGSGLDRCTT | 34    | 42  | 9HIA-A*02:01   | 34           | 0.0378        | 0.0427        | 0.0748        | 2.917        | 0.1957                     | 0.0378        | 0.0427         | 0.0748         | 2.917         | 0.1957     | 0.0378         | TRUE          | TRUE          | TRUE         | TRUE      | TRUE              | TRUE  |      |
| 1      | ITLGSGLDRCTT | 35    | 43  | 9HIA-A*02:01   | 35           | 0.0473        | 0.1133        | 0.0121        | -0.712       | 0.0187                     | 0.0473        | 0.1133         | 0.0121         | -0.712        | 0.0187     | 0.0473         | TRUE          | TRUE          | TRUE         | TRUE      | TRUE              | TRUE  |      |
| 1      | ITLGSGLDRCTT | 36    | 44  | 9HIA-A*02:01   | 36           | 0.1076        | 0.2576        | 0.0852        | -1.538       | 0.1935                     | 0.1076        | 0.2576         | 0.0852         | -1.538        | 0.1935     | 0.1076         | TRUE          | TRUE          | TRUE         | TRUE      | TRUE              | TRUE  |      |
| 1      | ITLGSGLDRCTT | 37    | 45  | 9HIA-A*02:01   | 37           | 0.016         | 0.0382        | 0.0165        | -1.421       | -0.0004                    | 0.016         | 0.0382         | 0.0165         | -1.421        | -0.0004    | 0.016          | TRUE          | TRUE          | TRUE         | TRUE      | TRUE              | TRUE  |      |
| 1      | ITLGSGLDRCTT | 38    | 46  | 9HIA-A*02:01   | 38           | 0.0217        | 0.0507        | 0.0163        | -0.107       | 0.0135                     | 0.0217        | 0.0507         | 0.0163         | -0.107        | 0.0135     | 0.0217         | TRUE          | TRUE          | TRUE         | TRUE      | TRUE              | TRUE  |      |
| 1      | ITLGSGLDRCTT | 39    | 47  | 9HIA-A*02:01   | 39           | 0.0358        | 0.0856        | 0.3526        | 2.813        | 0.2791                     | 0.0358        | 0.0856         | 0.3526         | 2.813         | 0.2791     | 0.0358         | TRUE          | TRUE          | TRUE         | TRUE      | TRUE              | TRUE  |      |
| 1      | ITLGSGLDRCTT | 40    | 48  | 9HIA-A*02:01   | 40           | 0.0495        | 0.1184        | 0.0903        | 1.968        | 0.2303                     | 0.0495        | 0.1184         | 0.0903         | 1.968         | 0.2303     | 0.0495         | TRUE          | TRUE          | TRUE         | TRUE      | TRUE              | TRUE  |      |
| 1      | ITLGSGLDRCTT | 41    | 49  | 9HIA-A*02:01   | 41           | 0.2624        | 0.6281        | 0.0907        | -1.969       | 0.432                      | 0.2624        | 0.6281         | 0.0907         | -1.969        | 0.432      | 0.2624         | TRUE          | TRUE          | TRUE         | TRUE      | TRUE              | TRUE  |      |
| 1      | ITLGSGLDRCTT | 42    | 50  | 9HIA-A*02:01   | 42           | 0.0713        | 0.0544        | 0.0713        | 2.366        | 0.2477                     | 0.0713        | 0.0544         | 0.0713         | 2.366         | 0.2477     | 0.0713         | TRUE          | TRUE          | TRUE         | TRUE      | TRUE              | TRUE  |      |
| 1      | ITLGSGLDRCTT | 43    | 51  | 9HIA-A*02:01   | 43           | 0.0163        | 0.039         | 0.0102        | -1.689       | -0.0439                    | 0.0163        | 0.039          | 0.0102         | -1.689        | -0.0439    | 0.0163         | TRUE          | TRUE          | TRUE         | TRUE      | TRUE              | TRUE  |      |
| 1      | ITLGSGLDRCTT | 44    | 52  | 9HIA-A*02:01   | 44           | 0.0201        | 0.0481        | 0.9958        | 0.427        | 0.2188                     | 0.0201        | 0.0481         | 0.9958         | 0.427         | 0.2188     | 0.0201         | TRUE          | TRUE          | TRUE         | TRUE      | TRUE              | TRUE  |      |
| 1      | ITLGSGLDRCTT | 45    | 53  | 9HIA-A*02:01   | 45           | 0.0111        | 0.0468        | 0.0111        | -0.245       | 0.0061                     | 0.0111        | 0.0468         | 0.0111         | -0.245        | 0.0061     | 0.0111         | TRUE          | TRUE          | TRUE         | TRUE      | TRUE              | TRUE  |      |
| 1      | ITLGSGLDRCTT | 46    | 54  | 9HIA-A*02:01   | 46           | 0.1223        | 0.2928        | 0.9967        | 1.027        | 0.4936                     | 0.1223        | 0.2928         | 0.9967         | 1.027         | 0.4936     | 0.1223         | TRUE          | TRUE          | TRUE         | TRUE      | TRUE              | TRUE  |      |
| 1      | ITLGSGLDRCTT | 47    | 55  | 9HIA-A*02:01   | 47           | 0.0858        | 0.2052        | 0.035         | -0.589       | 0.181                      | 0.0858        | 0.2052         | 0.035          | -0.589        | 0.181      | 0.0858         | TRUE          | TRUE          | TRUE         | TRUE      | TRUE              | TRUE  |      |
| 1      | ITLGSGLDRCTT | 48    | 56  | 9HIA-A*02:01   | 48           | 0.0468        | 0.102         | 0.0468        | -0.389       | 0.0007                     | 0.0468        | 0.102          | 0.0468         | -0.389        | 0.0007     | 0.0468         | TRUE          | TRUE          | TRUE         | TRUE      | TRUE              | TRUE  |      |
| 1      | ITLGSGLDRCTT | 49    | 57  | 9HIA-A*02:01   | 49           | 0.0144        | 0.0346        | 0.0345        | -1.974       | -0.009                     | 0.0144        | 0.0346         | 0.0345         | -1.974        | -0.009     | 0.0144         | TRUE          | TRUE          | TRUE         | TRUE      | TRUE              | TRUE  |      |
| 1      | ITLGSGLDRCTT | 50    | 58  | 9HIA-A*02:01   | 50           | 0.0417        | 0.0998        | 0.4214        | 0.689        | 0.1974                     | 0.0417        | 0.0998         | 0.4214         | 0.689         | 0.1974     | 0.0417         | TRUE          | TRUE          | TRUE         | TRUE      | TRUE              | TRUE  |      |
| 1      | ITLGSGLDRCTT | 51    | 59  | 9HIA-A*02:01   | 51           | 0.0716        | 0.1713        | 0.0719        | 2.581        | 0.3046                     | 0.0716        | 0.1713         | 0.0719         | 2.581         | 0.3046     | 0.0716         | TRUE          | TRUE          | TRUE         | TRUE      | TRUE              | TRUE  |      |
| 1      | ITLGSGLDRCTT | 52    | 60  | 9HIA-A*02:01   | 52           | 0.058         | 0.1574        | 0.058         | 1.729        | 0.151                      | 0.058         | 0.1574         | 0.058          | 1.729         | 0.151      | 0.058          | TRUE          | TRUE          | TRUE         | TRUE      | TRUE              | TRUE  |      |
| 1      | ITLGSGLDRCTT | 53    | 61  | 9HIA-A*02:01   | 53           | 0.3053        | 0.7307        | 0.0133        | 0.116        | 0.7385                     | 0.3053        | 0.7307         | 0.0133         | 0.116         | 0.7385     | 0.3053         | TRUE          | TRUE          | TRUE         | TRUE      | TRUE              | TRUE  |      |
| 1      | ITLGSGLDRCTT | 54    | 62  | 9HIA-A*02:01   | 54           | 0.081         | 0.1939        | 0.1555        | 2.433        | 0.4378                     | 0.081         | 0.1939         | 0.1555         | 2.433         | 0.4378     | 0.081          | TRUE          | TRUE          | TRUE         | TRUE      | TRUE              | TRUE  |      |
| 1      | ITLGSGLDRCTT | 55    | 63  | 9HIA-A*02:01   | 55           | 0.0176        | 0.0176        | 0.0176        | 0.0176       | 0.0176                     | 0.0176        | 0.0176         | 0.0176         | 0.0176        | 0.0176     | 0.0176         | 0.0176        | TRUE          | TRUE         | TRUE      | TRUE              | TRUE  | TRUE |
| 1      | ITLGSGLDRCTT | 56    | 64  | 9HIA-A*02:01   | 56           | 0.0707        | 0.0495        | 0.0262        | -2.512       | -0.0722                    | 0.0707        | 0.0495         | 0.0262         | -2.512        | -0.0722    | 0.0707         | TRUE          | TRUE          | TRUE         | TRUE      | TRUE              | TRUE  |      |
| 1      | ITLGSGLDRCTT | 57    | 65  | 9HIA-A*02:01   | 57           | 0.0389        | 0.0931        | 0.1111        | -1.549       | 0.0233                     | 0.0389        | 0.0931         | 0.1111         | -1.549        | 0.0233     | 0.0389         | TRUE          | TRUE          | TRUE         | TRUE      | TRUE              | TRUE  |      |

| # | peptide | start | end | peptide length | allele | peptide index | NC012725 | NC012726 | NC012727 | NC012728 | NC012729 | NC012730 | NC012731 | NC012732 | NC012733 | NC012734 | NC012735 | NC012736 | NC012737 | NC012738 | NC012739 | NC012740 | NC012741 | NC012742 | NC012743 | NC012744 | NC012745 | NC012746 | NC012747 | NC012748 | NC012749 | NC012750 | NC012751 | NC012752 | NC012753 | NC012754 | NC012755 | NC012756 | NC012757 | NC012758 | NC012759 | NC012760 | NC012761 | NC012762 | NC012763 | NC012764 | NC012765 | NC012766 | NC012767 | NC012768 | NC012769 | NC012770 | NC012771 | NC012772 | NC012773 | NC012774 | NC012775 | NC012776 | NC012777 | NC012778 | NC012779 | NC012780 | NC012781 | NC012782 | NC012783 | NC012784 | NC012785 | NC012786 | NC012787 | NC012788 | NC012789 | NC012790 | NC012791 | NC012792 | NC012793 | NC012794 | NC012795 | NC012796 | NC012797 | NC012798 | NC012799 | NC012800 | NC012801 | NC012802 | NC012803 | NC012804 | NC012805 | NC012806 | NC012807 | NC012808 | NC012809 | NC012810 | NC012811 | NC012812 | NC012813 | NC012814 | NC012815 | NC012816 | NC012817 | NC012818 | NC012819 | NC012820 | NC012821 | NC012822 | NC012823 | NC012824 | NC012825 | NC012826 | NC012827 | NC012828 | NC012829 | NC012830 | NC012831 | NC012832 | NC012833 | NC012834 | NC012835 | NC012836 | NC012837 | NC012838 | NC012839 | NC012840 | NC012841 | NC012842 | NC012843 | NC012844 | NC012845 | NC012846 | NC012847 | NC012848 | NC012849 | NC012850 | NC012851 | NC012852 | NC012853 | NC012854 | NC012855 | NC012856 | NC012857 | NC012858 | NC012859 | NC012860 | NC012861 | NC012862 | NC012863 | NC012864 | NC012865 | NC012866 | NC012867 | NC012868 | NC012869 | NC012870 | NC012871 | NC012872 | NC012873 | NC012874 | NC012875 | NC012876 | NC012877 | NC012878 | NC012879 | NC012880 | NC012881 | NC012882 | NC012883 | NC012884 | NC012885 | NC012886 | NC012887 | NC012888 | NC012889 | NC012890 | NC012891 | NC012892 | NC012893 | NC012894 | NC012895 | NC012896 | NC012897 | NC012898 | NC012899 | NC012900 | NC012901 | NC012902 | NC012903 | NC012904 | NC012905 | NC012906 | NC012907 | NC012908 | NC012909 | NC012910 | NC012911 | NC012912 | NC012913 | NC012914 | NC012915 | NC012916 | NC012917 | NC012918 | NC012919 | NC012920 | NC012921 | NC012922 | NC012923 | NC012924 | NC012925 | NC012926 | NC012927 | NC012928 | NC012929 | NC012930 | NC012931 | NC012932 | NC012933 | NC012934 | NC012935 | NC012936 | NC012937 | NC012938 | NC012939 | NC012940 | NC012941 | NC012942 | NC012943 | NC012944 | NC012945 | NC012946 | NC012947 | NC012948 | NC012949 | NC012950 | NC012951 | NC012952 | NC012953 | NC012954 | NC012955 | NC012956 | NC012957 | NC012958 | NC012959 | NC012960 | NC012961 | NC012962 | NC012963 | NC012964 | NC012965 | NC012966 | NC012967 | NC012968 | NC012969 | NC012970 | NC012971 | NC012972 | NC012973 | NC012974 | NC012975 | NC012976 | NC012977 | NC012978 | NC012979 | NC012980 | NC012981 | NC012982 | NC012983 | NC012984 | NC012985 | NC012986 | NC012987 | NC012988 | NC012989 | NC012990 | NC012991 | NC012992 | NC012993 | NC012994 | NC012995 | NC012996 | NC012997 | NC012998 | NC012999 | NC013000 | NC013001 | NC013002 | NC013003 | NC013004 | NC013005 | NC013006 | NC013007 | NC013008 | NC013009 | NC013010 | NC013011 | NC013012 | NC013013 | NC013014 | NC013015 | NC013016 | NC013017 | NC013018 | NC013019 | NC013020 | NC013021 | NC013022 | NC013023 | NC013024 | NC013025 | NC013026 | NC013027 | NC013028 | NC013029 | NC013030 | NC013031 | NC013032 | NC013033 | NC013034 | NC013035 | NC013036 | NC013037 | NC013038 | NC013039 | NC013040 | NC013041 | NC013042 | NC013043 | NC013044 | NC013045 | NC013046 | NC013047 | NC013048 | NC013049 | NC013050 | NC013051 | NC013052 | NC013053 | NC013054 | NC013055 | NC013056 | NC013057 | NC013058 | NC013059 | NC013060 | NC013061 |  |
|---|---------|-------|-----|----------------|--------|---------------|----------|----------|----------|----------|----------|----------|----------|----------|----------|----------|----------|----------|----------|----------|----------|----------|----------|----------|----------|----------|----------|----------|----------|----------|----------|----------|----------|----------|----------|----------|----------|----------|----------|----------|----------|----------|----------|----------|----------|----------|----------|----------|----------|----------|----------|----------|----------|----------|----------|----------|----------|----------|----------|----------|----------|----------|----------|----------|----------|----------|----------|----------|----------|----------|----------|----------|----------|----------|----------|----------|----------|----------|----------|----------|----------|----------|----------|----------|----------|----------|----------|----------|----------|----------|----------|----------|----------|----------|----------|----------|----------|----------|----------|----------|----------|----------|----------|----------|----------|----------|----------|----------|----------|----------|----------|----------|----------|----------|----------|----------|----------|----------|----------|----------|----------|----------|----------|----------|----------|----------|----------|----------|----------|----------|----------|----------|----------|----------|----------|----------|----------|----------|----------|----------|----------|----------|----------|----------|----------|----------|----------|----------|----------|----------|----------|----------|----------|----------|----------|----------|----------|----------|----------|----------|----------|----------|----------|----------|----------|----------|----------|----------|----------|----------|----------|----------|----------|----------|----------|----------|----------|----------|----------|----------|----------|----------|----------|----------|----------|----------|----------|----------|----------|----------|----------|----------|----------|----------|----------|----------|----------|----------|----------|----------|----------|----------|----------|----------|----------|----------|----------|----------|----------|----------|----------|----------|----------|----------|----------|----------|----------|----------|----------|----------|----------|----------|----------|----------|----------|----------|----------|----------|----------|----------|----------|----------|----------|----------|----------|----------|----------|----------|----------|----------|----------|----------|----------|----------|----------|----------|----------|----------|----------|----------|----------|----------|----------|----------|----------|----------|----------|----------|----------|----------|----------|----------|----------|----------|----------|----------|----------|----------|----------|----------|----------|----------|----------|----------|----------|----------|----------|----------|----------|----------|----------|----------|----------|----------|----------|----------|----------|----------|----------|----------|----------|----------|----------|----------|----------|----------|----------|----------|----------|----------|----------|----------|----------|----------|----------|----------|----------|----------|----------|----------|----------|----------|----------|----------|----------|----------|----------|----------|----------|----------|----------|----------|----------|----------|----------|----------|----------|----------|----------|----------|----------|----------|----------|----------|----------|----------|----------|----------|----------|----------|----------|----------|----------|--|
|---|---------|-------|-----|----------------|--------|---------------|----------|----------|----------|----------|----------|----------|----------|----------|----------|----------|----------|----------|----------|----------|----------|----------|----------|----------|----------|----------|----------|----------|----------|----------|----------|----------|----------|----------|----------|----------|----------|----------|----------|----------|----------|----------|----------|----------|----------|----------|----------|----------|----------|----------|----------|----------|----------|----------|----------|----------|----------|----------|----------|----------|----------|----------|----------|----------|----------|----------|----------|----------|----------|----------|----------|----------|----------|----------|----------|----------|----------|----------|----------|----------|----------|----------|----------|----------|----------|----------|----------|----------|----------|----------|----------|----------|----------|----------|----------|----------|----------|----------|----------|----------|----------|----------|----------|----------|----------|----------|----------|----------|----------|----------|----------|----------|----------|----------|----------|----------|----------|----------|----------|----------|----------|----------|----------|----------|----------|----------|----------|----------|----------|----------|----------|----------|----------|----------|----------|----------|----------|----------|----------|----------|----------|----------|----------|----------|----------|----------|----------|----------|----------|----------|----------|----------|----------|----------|----------|----------|----------|----------|----------|----------|----------|----------|----------|----------|----------|----------|----------|----------|----------|----------|----------|----------|----------|----------|----------|----------|----------|----------|----------|----------|----------|----------|----------|----------|----------|----------|----------|----------|----------|----------|----------|----------|----------|----------|----------|----------|----------|----------|----------|----------|----------|----------|----------|----------|----------|----------|----------|----------|----------|----------|----------|----------|----------|----------|----------|----------|----------|----------|----------|----------|----------|----------|----------|----------|----------|----------|----------|----------|----------|----------|----------|----------|----------|----------|----------|----------|----------|----------|----------|----------|----------|----------|----------|----------|----------|----------|----------|----------|----------|----------|----------|----------|----------|----------|----------|----------|----------|----------|----------|----------|----------|----------|----------|----------|----------|----------|----------|----------|----------|----------|----------|----------|----------|----------|----------|----------|----------|----------|----------|----------|----------|----------|----------|----------|----------|----------|----------|----------|----------|----------|----------|----------|----------|----------|----------|----------|----------|----------|----------|----------|----------|----------|----------|----------|----------|----------|----------|----------|----------|----------|----------|----------|----------|----------|----------|----------|----------|----------|----------|----------|----------|----------|----------|----------|----------|----------|----------|----------|----------|----------|----------|----------|----------|----------|----------|----------|----------|----------|----------|----------|----------|----------|----------|--|

[illegible]

| seq id | peptide  | start | end | peptide length | allele      | peptide index | NetCL Predict | NetCL Rescan | NetCL c term | NetCL TAP | NetCL Predict | NetCL SuperT | legacy predict | legacy rescan | legacy c term | legacy tap | legacy predict | equal predict | equal rescan | equal c term | equal tap | equal predictions | score |
|--------|----------|-------|-----|----------------|-------------|---------------|---------------|--------------|--------------|-----------|---------------|--------------|----------------|---------------|---------------|------------|----------------|---------------|--------------|--------------|-----------|-------------------|-------|
| 1      | ITTTGGVQ | 484   | 492 | 9              | HLA-A*02:01 | 484           | 0.08          | 0.195        | 0.0303       | -0.286    | 0.1787        | 0.24         | 0.08           | 0.195         | 0.0303        | -0.286     | 0.1787         | TRUE          | TRUE         | TRUE         | TRUE      | TRUE              | TRUE  |
| 2      | ITTTGGVQ | 484   | 493 | 10             | HLA-A*02:01 | 484           | 0.085         | 0.205        | 0.0303       | -0.286    | 0.1787        | 0.24         | 0.085          | 0.205         | 0.0303        | -0.286     | 0.1787         | TRUE          | TRUE         | TRUE         | TRUE      | TRUE              | TRUE  |
| 3      | ITTTGGVQ | 484   | 494 | 11             | HLA-A*02:01 | 484           | 0.006         | 0.042        | 0.0809       | -0.278    | 0.307         | 0.208        | 0.006          | 0.042         | 0.0809        | -0.278     | 0.307          | TRUE          | TRUE         | TRUE         | TRUE      | TRUE              | TRUE  |
| 4      | ITTTGGVQ | 487   | 495 | 9              | HLA-A*02:01 | 487           | 0.0223        | 0.0534       | 0.0212       | 1.376     | 0.1024        | 0.2023       | 0.0223         | 0.0534        | 0.0212        | 1.376      | 0.1024         | TRUE          | TRUE         | TRUE         | TRUE      | TRUE              | TRUE  |
| 5      | ITTTGGVQ | 487   | 496 | 10             | HLA-A*02:01 | 487           | 0.1136        | 0.1136       | 0.0861       | 0.1136    | 0.1136        | 0.2023       | 0.1136         | 0.1136        | 0.0861        | 0.1136     | 0.1136         | TRUE          | TRUE         | TRUE         | TRUE      | TRUE              | TRUE  |
| 6      | ITTTGGVQ | 488   | 497 | 10             | HLA-A*02:01 | 488           | 0.0644        | 0.1541       | 0.0602       | 0.228     | 0.2645        | 0.2644       | 0.0644         | 0.1541        | 0.0602        | 0.228      | 0.2645         | TRUE          | TRUE         | TRUE         | TRUE      | TRUE              | TRUE  |
| 7      | ITTTGGVQ | 490   | 498 | 9              | HLA-A*02:01 | 490           | 0.1123        | 0.2689       | 0.0643       | 0.377     | 0.4324        | 0.1123       | 0.2689         | 0.0643        | 0.377         | 0.4324     | TRUE           | TRUE          | TRUE         | TRUE         | TRUE      | TRUE              |       |
| 8      | ITTTGGVQ | 490   | 499 | 10             | HLA-A*02:01 | 490           | 0.0393        | 0.0393       | 0.0393       | 0.0393    | 0.0393        | 0.2023       | 0.0393         | 0.0393        | 0.0393        | 0.0393     | 0.0393         | TRUE          | TRUE         | TRUE         | TRUE      | TRUE              | TRUE  |
| 9      | ITTTGGVQ | 492   | 500 | 9              | HLA-A*02:01 | 492           | 0.0197        | 0.0472       | 0.0702       | -0.402    | -0.0161       | 0.0197       | 0.0472         | 0.0702        | -0.402        | -0.0161    | 0.0197         | TRUE          | TRUE         | TRUE         | TRUE      | TRUE              | TRUE  |
| 10     | ITTTGGVQ | 493   | 501 | 9              | HLA-A*02:01 | 493           | 0.0196        | 0.0469       | 0.0846       | 2.319     | 0.3105        | 0.0196       | 0.0469         | 0.0846        | 2.319         | 0.3105     | 0.0196         | TRUE          | TRUE         | TRUE         | TRUE      | TRUE              | TRUE  |
| 11     | ITTTGGVQ | 494   | 502 | 9              | HLA-A*02:01 | 494           | 0.0391        | 0.0456       | 0.0112       | -1.446    | -0.025        | 0.0391       | 0.0456         | 0.0112        | -1.446        | -0.025     | 0.0391         | TRUE          | TRUE         | TRUE         | TRUE      | TRUE              | TRUE  |
| 12     | ITTTGGVQ | 495   | 503 | 9              | HLA-A*02:01 | 495           | 0.1112        | 0.1112       | 0.0965       | 1.3676    | 0.076         | 0.0112       | 0.1112         | 0.0965        | 1.3676        | 0.076      | 0.0112         | TRUE          | TRUE         | TRUE         | TRUE      | TRUE              | TRUE  |
| 13     | ITTTGGVQ | 496   | 504 | 9              | HLA-A*02:01 | 496           | 0.0558        | 0.1335       | 0.0401       | 1.365     | 0.3428        | 0.0558       | 0.1335         | 0.0401        | 1.365         | 0.3428     | 0.0558         | TRUE          | TRUE         | TRUE         | TRUE      | TRUE              | TRUE  |
| 14     | ITTTGGVQ | 497   | 505 | 9              | HLA-A*02:01 | 497           | 0.0304        | 0.0728       | 0.0133       | -1.05     | 0.0223        | 0.0304       | 0.0728         | 0.0133        | -1.05         | 0.0223     | 0.0304         | TRUE          | TRUE         | TRUE         | TRUE      | TRUE              | TRUE  |
| 15     | ITTTGGVQ | 498   | 506 | 9              | HLA-A*02:01 | 498           | 0.1798        | 0.4306       | 0.0766       | -0.411    | 0.41          | 0.1798       | 0.4306         | 0.0766        | -0.411        | 0.41       | 0.1798         | TRUE          | TRUE         | TRUE         | TRUE      | TRUE              | TRUE  |
| 16     | ITTTGGVQ | 499   | 507 | 9              | HLA-A*02:01 | 499           | 0.057         | 0.1364       | 0.0274       | 0.308     | 0.1559        | 0.057        | 0.1364         | 0.0274        | 0.308         | 0.1559     | 0.057          | TRUE          | TRUE         | TRUE         | TRUE      | TRUE              | TRUE  |
| 17     | ITTTGGVQ | 500   | 508 | 9              | HLA-A*02:01 | 500           | 0.0312        | 0.0747       | 0.04319      | -0.413    | 0.1189        | 0.0312       | 0.0747         | 0.04319       | -0.413        | 0.1189     | 0.0312         | TRUE          | TRUE         | TRUE         | TRUE      | TRUE              | TRUE  |
| 18     | ITTTGGVQ | 501   | 509 | 9              | HLA-A*02:01 | 501           | 0.0281        | 0.0671       | 0.0236       | -0.864    | 0.0263        | 0.0281       | 0.0671         | 0.0236        | -0.864        | 0.0263     | 0.0281         | TRUE          | TRUE         | TRUE         | TRUE      | TRUE              | TRUE  |
| 19     | ITTTGGVQ | 502   | 510 | 9              | HLA-A*02:01 | 502           | 0.315         | 0.7538       | 0.999        | 0.043     | 0.9038        | 0.315        | 0.7538         | 0.999         | 0.043         | 0.9038     | 0.315          | TRUE          | TRUE         | TRUE         | TRUE      | TRUE              | TRUE  |
| 20     | ITTTGGVQ | 503   | 511 | 9              | HLA-A*02:01 | 503           | 0.1721        | 0.4118       | 0.0135       | -0.223    | 0.4027        | 0.1721       | 0.4118         | 0.0135        | -0.223        | 0.4027     | 0.1721         | TRUE          | TRUE         | TRUE         | TRUE      | TRUE              | TRUE  |
| 21     | ITTTGGVQ | 504   | 512 | 9              | HLA-A*02:01 | 504           | 0.0189        | 0.0453       | 0.0124       | -1.479    | -0.0208       | 0.0189       | 0.0453         | 0.0124        | -1.479        | -0.0208    | 0.0189         | TRUE          | TRUE         | TRUE         | TRUE      | TRUE              | TRUE  |
| 22     | ITTTGGVQ | 505   | 513 | 9              | HLA-A*02:01 | 505           | 0.0193        | 0.0461       | 0.0147       | 0.227     | 0.0906        | 0.0193       | 0.0461         | 0.0147        | 0.227         | 0.0906     | 0.0193         | TRUE          | TRUE         | TRUE         | TRUE      | TRUE              | TRUE  |
| 23     | ITTTGGVQ | 506   | 514 | 9              | HLA-A*02:01 | 506           | 0.0195        | 0.0466       | 0.0809       | 0.462     | 0.2169        | 0.0195       | 0.0466         | 0.0809        | 0.462         | 0.2169     | 0.0195         | TRUE          | TRUE         | TRUE         | TRUE      | TRUE              | TRUE  |
| 24     | ITTTGGVQ | 507   | 515 | 9              | HLA-A*02:01 | 507           | 0.0285        | 0.0683       | 0.0764       | 0.645     | 0.2164        | 0.0285       | 0.0683         | 0.0764        | 0.645         | 0.2164     | 0.0285         | TRUE          | TRUE         | TRUE         | TRUE      | TRUE              | TRUE  |
| 25     | ITTTGGVQ | 508   | 516 | 9              | HLA-A*02:01 | 508           | 0.0135        | 0.0562       | 0.0098       | -2.19     | -0.0138       | 0.0135       | 0.0562         | 0.0098        | -2.19         | -0.0138    | 0.0135         | TRUE          | TRUE         | TRUE         | TRUE      | TRUE              | TRUE  |
| 26     | ITTTGGVQ | 509   | 517 | 9              | HLA-A*02:01 | 509           | 0.0617        | 0.1476       | 0.0231       | -0.425    | 0.1299        | 0.0617       | 0.1476         | 0.0231        | -0.425        | 0.1299     | 0.0617         | TRUE          | TRUE         | TRUE         | TRUE      | TRUE              | TRUE  |
| 27     | ITTTGGVQ | 510   | 518 | 9              | HLA-A*02:01 | 510           | 0.0226        | 0.054        | 0.0114       | -1.886    | -0.0385       | 0.0226       | 0.054          | 0.0114        | -1.886        | -0.0385    | 0.0226         | TRUE          | TRUE         | TRUE         | TRUE      | TRUE              | TRUE  |
| 28     | ITTTGGVQ | 511   | 519 | 9              | HLA-A*02:01 | 511           | 0.0217        | 0.0517       | 0.0113       | -0.067    | 0.017         | 0.0217       | 0.0517         | 0.0113        | -0.067        | 0.017      | 0.0217         | TRUE          | TRUE         | TRUE         | TRUE      | TRUE              | TRUE  |
| 29     | ITTTGGVQ | 512   | 520 | 9              | HLA-A*02:01 | 512           | 0.0196        | 0.0475       | 0.0234       | -0.042    | 0.1431        | 0.0196       | 0.0475         | 0.0234        | -0.042        | 0.1431     | 0.0196         | TRUE          | TRUE         | TRUE         | TRUE      | TRUE              | TRUE  |
| 30     | ITTTGGVQ | 513   | 521 | 9              | HLA-A*02:01 | 513           | 0.0184        | 0.0441       | 0.0325       | 0.022     | 0.0981        | 0.0184       | 0.0441         | 0.0325        | 0.022         | 0.0981     | 0.0184         | TRUE          | TRUE         | TRUE         | TRUE      | TRUE              | TRUE  |
| 31     | ITTTGGVQ | 514   | 522 | 9              | HLA-A*02:01 | 514           | 0.0605        | 0.1447       | 0.0262       | -1.338    | 0.0817        | 0.0605       | 0.1447         | 0.0262        | -1.338        | 0.0817     | 0.0605         | TRUE          | TRUE         | TRUE         | TRUE      | TRUE              | TRUE  |
| 32     | ITTTGGVQ | 515   | 523 | 9              | HLA-A*02:01 | 515           | 0.0211        | 0.0544       | 0.0244       | 0.0768    | 0.0244        | 0.0211       | 0.0544         | 0.0244        | 0.0768        | 0.0244     | 0.0211         | TRUE          | TRUE         | TRUE         | TRUE      | TRUE              | TRUE  |
| 33     | ITTTGGVQ | 516   | 524 | 9              | HLA-A*02:01 | 516           | 0.0251        | 0.0601       | 0.0005       | -0.082    | 0.0766        | 0.0251       | 0.0601         | 0.0005        | -0.082        | 0.0766     | 0.0251         | TRUE          | TRUE         | TRUE         | TRUE      | TRUE              | TRUE  |
| 34     | ITTTGGVQ | 517   | 525 | 9              | HLA-A*02:01 | 517           | 0.0282        | 0.0676       | 0.0403       | 0.058     | 0.1565        | 0.0282       | 0.0676         | 0.0403        | 0.058         | 0.1565     | 0.0282         | TRUE          | TRUE         | TRUE         | TRUE      | TRUE              | TRUE  |
| 35     | ITTTGGVQ | 518   | 526 | 9              | HLA-A*02:01 | 518           | 0.0162        | 0.037        | 0.0103       | -1.531    | 0.0103        | 0.0162       | 0.037          | 0.0103        | -1.531        | 0.0103     | 0.0162         | TRUE          | TRUE         | TRUE         | TRUE      | TRUE              | TRUE  |
| 36     | ITTTGGVQ | 519   | 527 | 9              | HLA-A*02:01 | 519           | 0.0598        | 0.1432       | 0.0956       | 2.526     | 0.4188        | 0.0598       | 0.1432         | 0.0956        | 2.526         | 0.4188     | 0.0598         | TRUE          | TRUE         | TRUE         | TRUE      | TRUE              | TRUE  |
| 37     | ITTTGGVQ | 520   | 528 | 9              | HLA-A*02:01 | 520           | 0.0189        | 0.0452       | 0.0097       | -1.289    | -0.0178       | 0.0189       | 0.0452         | 0.0097        | -1.289        | -0.0178    | 0.0189         | TRUE          | TRUE         | TRUE         | TRUE      | TRUE              | TRUE  |
| 38     | ITTTGGVQ | 521   | 529 | 9              | HLA-A*02:01 | 521           | 0.0245        | 0.0515       | 0.0403       | 0.469     | 0.2164        | 0.0245       | 0.0515         | 0.0403        | 0.469         | 0.2164     | 0.0245         | TRUE          | TRUE         | TRUE         | TRUE      | TRUE              | TRUE  |
| 39     | ITTTGGVQ | 522   | 530 | 9              | HLA-A*02:01 | 522           | 0.0158        | 0.0379       | 0.0123       | -1.093    | -0.015        | 0.0158       | 0.0379         | 0.0123        | -1.093        | -0.015     | 0.0158         | TRUE          | TRUE         | TRUE         | TRUE      | TRUE              | TRUE  |
| 40     | ITTTGGVQ | 523   | 531 | 9              | HLA-A*02:01 | 523           | 0.0277        | 0.0662       | 0.0118       | -1.143    | 0.0108        | 0.0277       | 0.0662         | 0.0118        | -1.143        | 0.0108     | 0.0277         | TRUE          | TRUE         | TRUE         | TRUE      | TRUE              | TRUE  |
| 41     | ITTTGGVQ | 524   | 532 | 9              | HLA-A*02:01 | 524           | 0.0528        | 0.1264       | 0.0901       | 0.909     | 0.3204        | 0.0528       | 0.1264         | 0.0901        | 0.909         | 0.3204     | 0.0528         | TRUE          | TRUE         | TRUE         | TRUE      | TRUE              | TRUE  |
| 42     | ITTTGGVQ | 525   | 533 | 9              | HLA-A*02:01 | 525           | 0.0135        | 0.0564       | 0.0146       | 0.0446    | 0.0146        | 0.0135       | 0.0564         | 0.0146        | 0.0446        | 0.0146     | 0.0135         | TRUE          | TRUE         | TRUE         | TRUE      | TRUE              | TRUE  |
| 43     | ITTTGGVQ | 526   | 534 | 9              | HLA-A*02:01 | 526           | 0.0184        | 0.044        | 0.0287       | -1.238    | -0.0136       | 0.0184       | 0.044          | 0.0287        | -1.238        | -0.0136    | 0.0184         | TRUE          | TRUE         | TRUE         | TRUE      | TRUE              | TRUE  |
| 44     | ITTTGGVQ | 527   | 535 | 9              | HLA-A*02:01 | 527           | 0.0441        | 0.1055       | 0.0382       | -0.7      | 0.0762        | 0.0441       | 0.1055         | 0.0382        | -0.7          | 0.0762     | 0.0441         | TRUE          | TRUE         | TRUE         | TRUE      | TRUE              | TRUE  |
| 45     | ITTTGGVQ | 528   | 536 | 9              | HLA-A*02:01 | 528           | 0.0173        | 0.0373       | 0.0136       | -0.072    | 0.0136        | 0.0173       | 0.0373         | 0.0136        | -0.072        | 0.0136     | 0.0173         | TRUE          | TRUE         | TRUE         | TRUE      | TRUE              | TRUE  |
| 46     | ITTTGGVQ | 529   | 537 | 9              | HLA-A*02:01 | 529           | 0.0304        | 0.0727       | 0.0998       | 0.045     | 0.0899        | 0.0304       | 0.0727         | 0.0998        | 0.045         | 0.0899     | 0.0304         | TRUE          | TRUE         | TRUE         | TRUE      | TRUE              | TRUE  |
| 47     | ITTTGGVQ | 530   | 538 | 9              | HLA-A*02:01 | 530           | 0.0218        | 0.0522       | 0.0959       | 0.638     | 0.2335        | 0.0218       | 0.0522         | 0.0959        | 0.638         | 0.2335     | 0.0218         | TRUE          | TRUE         | TRUE         | TRUE      | TRUE              | TRUE  |
| 48     | ITTTGGVQ | 531   | 539 | 9              | HLA-A*02:01 | 531           | 0.0218        | 0.0522       | 0.0959       | 0.638     | 0.2335        | 0.0218       | 0.0522         | 0.0959        | 0.638         | 0.2335     | 0.0218         | TRUE          | TRUE         | TRUE         | TRUE      | TRUE              | TRUE  |
| 49     | ITTTGGVQ | 532   | 540 | 9              | HLA-A*02:01 | 532           | 0.0624        | 0.1493       | 0.0977       | -0.106    | 0.1579        | 0.0624       | 0.1493         | 0.0977        | -0.106        | 0.1579     | 0.0624         | TRUE          | TRUE         | TRUE         | TRUE      | TRUE              | TRUE  |
| 50     | ITTTGGVQ | 533   | 541 | 9              | HLA-A*02:01 | 533           | 0.0219        | 0.0524       | 0.0492       | -2.521    | -0.0663       | 0.0219       | 0.0524         | 0.0492        | -2.521        | -0.0663    | 0.0219         | TRUE          | TRUE         | TRUE         | TRUE      | TRUE              | TRUE  |
| 51     | ITTTGGVQ | 534   | 542 | 9              | HLA-A*02:01 | 534           | 0.0441        | 0.0815       | 0.0247       | -2.599    | -0.0436       | 0.0441       | 0.0815         | 0.0247        | -2.599        | -0.0436    | 0.0441         | TRUE          | TRUE         | TRUE         | TRUE      | TRUE              | TRUE  |
| 52     | ITTTGGVQ | 535   | 543 | 9              | HLA-A*02:01 | 535           | 0.0347        | 0.0752       | 0.0325       | 0.928     | 0.315         | 0.0347       | 0.0752         | 0.0325        | 0.928         | 0.315      | 0.0347         | TRUE          | TRUE         | TRUE         | TRUE      | TRUE              | TRUE  |
| 53     | ITTTGGVQ | 536   | 544 | 9              | HLA-A*02:01 | 536           | 0.0392        | 0.0938       | 0.0836       | 1.472     | 0.315         | 0.0392       | 0.0938         | 0.0836        | 1.472         | 0.315      | 0.0392         | TRUE          | TRUE         | TRUE         | TRUE      | TRUE              | TRUE  |
| 54     | ITTTGGVQ | 537   | 545 | 9              | HLA-A*02:01 | 537           | 0.1718        | 0.4112       | 0.0955       | 2.55      | 0.6881        | 0.1718       | 0.4112         | 0.0955        | 2.55          | 0.6881     | 0.1718         | TRUE          | TRUE         | TRUE         | TRUE      | TRUE              | TRUE  |
| 55     | ITTTGGVQ | 538   | 546 | 9              | HLA-A*02:01 | 538           | 0.0108        | 0.0245       | 0.0108       | -0.072    | 0.0108        | 0.0108       | 0.0245         | 0.0108        | -0.072        | 0.0108     | 0.0108         | TRUE          | TRUE         | TRUE         | TRUE      | TRUE              | TRUE  |
| 56     | IT       |       |     |                |             |               |               |              |              |           |               |              |                |               |               |            |                |               |              |              |           |                   |       |

[illegible]

[illegible]

| # | deposition | start | end  | peptide length | allele        | side index | NetCtCD | NetCtCDRes | NetCtCDResL | NetCtCD    | NetCtCDRes  | NetCtCDResL | legacy predict | legacy recall | legacy t | legacy tau | legacy predict | equal predicted | equal recall | equal t | terminal | equal tau | equal tau | equal predictions | score  |        |        |        |        |        |
|---|------------|-------|------|----------------|---------------|------------|---------|------------|-------------|------------|-------------|-------------|----------------|---------------|----------|------------|----------------|-----------------|--------------|---------|----------|-----------|-----------|-------------------|--------|--------|--------|--------|--------|--------|
| 1 | DEAVEAQI   | 967   | 975  | 978            | 9.HLA*A*02:01 | 967        | 0.0254  | 0.0608     | 0.2311      | 0.394E-01  | 0.1587E-02  | 0.0254      | 0.0608         | 0.0254        | 0.0608   | 0.5212     | 0.394          | 0.1587          | TRUE         | TRUE    | TRUE     | TRUE      | TRUE      | TRUE              | TRUE   | TRUE   |        |        |        |        |
| 1 | EAEGVQID   | 968   | 978  | 978            | 9.HLA*A*02:01 | 968        | 0.0254  | 0.0608     | 0.040E-02   | -1.855E-03 | -0.0903E-02 | 0.0254      | 0.0608         | 0.0254        | 0.0608   | 0.0104     | -1.853         | -0.0903         | TRUE         | TRUE    | TRUE     | TRUE      | TRUE      | TRUE              | TRUE   | TRUE   |        |        |        |        |
| 1 | VEASQD     | 977   | 984  | 978            | 9.HLA*A*02:01 | 977        | 0.0254  | 0.0608     | 0.052E-02   | 0.232E-02  | 0.122E-02   | 0.0254      | 0.0608         | 0.0254        | 0.0608   | 0.0254     | 0.0608         | 0.0254          | 0.0608       | 0.0254  | 0.0608   | 0.0254    | 0.0608    | 0.0254            | 0.0608 | 0.0254 | 0.0608 | 0.0254 | 0.0608 | 0.0254 |
| 1 | IAEVDQIR   | 978   | 978  | 978            | 9.HLA*A*02:01 | 978        | 0.0312  | 0.0746     | 0.424E-01   | 0.709E-01  | 0.1735E-02  | 0.0312      | 0.0746         | 0.0312        | 0.0746   | 0.4238     | 0.705          | 0.1735          | TRUE         | TRUE    | TRUE     | TRUE      | TRUE      | TRUE              | TRUE   | TRUE   | TRUE   | TRUE   | TRUE   | TRUE   |
| 1 | IAEVDQIR   | 971   | 979  | 979            | 9.HLA*A*02:01 | 971        | 0.0309  | 0.0739     | 0.703E-01   | 0.454E-01  | 0.202E-02   | 0.0309      | 0.0739         | 0.0309        | 0.0739   | 0.703      | 0.454          | 0.202           | TRUE         | TRUE    | TRUE     | TRUE      | TRUE      | TRUE              | TRUE   | TRUE   | TRUE   | TRUE   | TRUE   | TRUE   |
| 1 | IQVDQIT    | 977   | 981  | 979            | 9.HLA*A*02:01 | 977        | 0.0732  | 0.198      | 0.476E-01   | 0.606E-01  | 0.046E-02   | 0.0732      | 0.198          | 0.0732        | 0.198    | 0.476      | 0.606          | 0.046           | TRUE         | TRUE    | TRUE     | TRUE      | TRUE      | TRUE              | TRUE   | TRUE   | TRUE   | TRUE   | TRUE   | TRUE   |
| 1 | IQVDQIT    | 973   | 981  | 979            | 9.HLA*A*02:01 | 973        | 0.0297  | 0.0712     | 0.378E-02   | -1.366E-03 | 0.0091E-02  | 0.0297      | 0.0712         | 0.0297        | 0.0712   | 0.378      | -1.356         | 0.0091          | TRUE         | TRUE    | TRUE     | TRUE      | TRUE      | TRUE              | TRUE   | TRUE   | TRUE   | TRUE   | TRUE   | TRUE   |
| 1 | IQVDQIT    | 974   | 982  | 979            | 9.HLA*A*02:01 | 974        | 0.0469  | 0.1123     | 0.424E-01   | 0.150E-03  | 0.298E-02   | 0.0469      | 0.1123         | 0.0469        | 0.1123   | 0.424      | 0.150          | 0.298           | TRUE         | TRUE    | TRUE     | TRUE      | TRUE      | TRUE              | TRUE   | TRUE   | TRUE   | TRUE   | TRUE   | TRUE   |
| 1 | IQVDQIT    | 975   | 983  | 979            | 9.HLA*A*02:01 | 975        | 0.0225  | 0.0539     | 0.966E-01   | 0.670E-01  | 0.236E-02   | 0.0225      | 0.0539         | 0.0225        | 0.0539   | 0.966      | 0.670          | 0.236           | TRUE         | TRUE    | TRUE     | TRUE      | TRUE      | TRUE              | TRUE   | TRUE   | TRUE   | TRUE   | TRUE   | TRUE   |
| 1 | IQVDQIT    | 976   | 984  | 979            | 9.HLA*A*02:01 | 976        | 0.0249  | 0.0549     | 0.024E-02   | -1.187E-03 | -0.0087E-02 | 0.0249      | 0.0549         | 0.0249        | 0.0549   | 0.024      | -1.187         | -0.0087         | TRUE         | TRUE    | TRUE     | TRUE      | TRUE      | TRUE              | TRUE   | TRUE   | TRUE   | TRUE   | TRUE   | TRUE   |
| 1 | IQVDQIT    | 977   | 985  | 979            | 9.HLA*A*02:01 | 977        | 0.1231  | 0.2923     | 0.388E-01   | -2.056E-03 | 0.191E-02   | 0.1231      | 0.2923         | 0.1231        | 0.2923   | 0.388      | -2.052         | 0.191           | TRUE         | TRUE    | TRUE     | TRUE      | TRUE      | TRUE              | TRUE   | TRUE   | TRUE   | TRUE   | TRUE   | TRUE   |
| 1 | IQVDQIT    | 978   | 986  | 979            | 9.HLA*A*02:01 | 978        | 0.24    | 0.5744     | 0.888E-01   | 1.188E-03  | 0.781E-02   | 0.24        | 0.5744         | 0.24          | 0.5744   | 0.888      | 1.188          | 0.781           | TRUE         | TRUE    | TRUE     | TRUE      | TRUE      | TRUE              | TRUE   | TRUE   | TRUE   | TRUE   | TRUE   | TRUE   |
| 1 | IQVDQIT    | 979   | 979  | 979            | 9.HLA*A*02:01 | 979        | 0.0323  | 0.0823     | 0.052E-02   | 0.218E-02  | 0.0091E-02  | 0.0323      | 0.0823         | 0.0323        | 0.0823   | 0.052      | 0.218          | 0.0091          | TRUE         | TRUE    | TRUE     | TRUE      | TRUE      | TRUE              | TRUE   | TRUE   | TRUE   | TRUE   | TRUE   | TRUE   |
| 1 | IQVDQIT    | 980   | 988  | 979            | 9.HLA*A*02:01 | 980        | 0.0166  | 0.0397     | 0.246E-02   | -9.35E-03  | -0.0034E-02 | 0.0166      | 0.0397         | 0.0166        | 0.0397   | 0.246      | -9.35          | -0.0034         | TRUE         | TRUE    | TRUE     | TRUE      | TRUE      | TRUE              | TRUE   | TRUE   | TRUE   | TRUE   | TRUE   | TRUE   |
| 1 | IRGLQDQY   | 981   | 989  | 989            | 9.HLA*A*02:01 | 981        | 0.0388  | 0.0446     | 0.995E-01   | 2.988E-03  | 0.3429E-02  | 0.0388      | 0.0446         | 0.0388        | 0.0446   | 0.995      | 2.98           | 0.3429          | TRUE         | TRUE    | TRUE     | TRUE      | TRUE      | TRUE              | TRUE   | TRUE   | TRUE   | TRUE   | TRUE   | TRUE   |
| 1 | IRGLQDQY   | 982   | 989  | 989            | 9.HLA*A*02:01 | 982        | 0.0395  | 0.0455     | 0.288E-01   | 5.16E-02   | 0.1199E-02  | 0.0395      | 0.0455         | 0.0395        | 0.0455   | 0.288      | 5.16           | 0.1199          | TRUE         | TRUE    | TRUE     | TRUE      | TRUE      | TRUE              | TRUE   | TRUE   | TRUE   | TRUE   | TRUE   | TRUE   |
| 1 | IRGLQDQY   | 983   | 991  | 989            | 9.HLA*A*02:01 | 983        | 0.0355  | 0.051      | 1.26E-01    | 4.39E-01   | 0.0549E-02  | 0.0355      | 0.051          | 0.0355        | 0.051    | 1.26       | 4.39           | 0.0549          | TRUE         | TRUE    | TRUE     | TRUE      | TRUE      | TRUE              | TRUE   | TRUE   | TRUE   | TRUE   | TRUE   | TRUE   |
| 1 | IRGLQDQY   | 984   | 992  | 989            | 9.HLA*A*02:01 | 984        | 0.0212  | 0.0508     | 0.533E-02   | 1.40E-02   | 0.095E-02   | 0.0212      | 0.0508         | 0.0212        | 0.0508   | 0.533      | 0.014          | 0.095E          | TRUE         | TRUE    | TRUE     | TRUE      | TRUE      | TRUE              | TRUE   | TRUE   | TRUE   | TRUE   | TRUE   | TRUE   |
| 1 | IRGLQDQY   | 985   | 993  | 989            | 9.HLA*A*02:01 | 985        | 0.0935  | 0.2239     | 0.575E-01   | -1.14E-01  | 0.244E-02   | 0.0935      | 0.2239         | 0.0935        | 0.2239   | 0.575      | -1.14          | 0.244           | TRUE         | TRUE    | TRUE     | TRUE      | TRUE      | TRUE              | TRUE   | TRUE   | TRUE   | TRUE   | TRUE   | TRUE   |
| 1 | IRGLQDQY   | 986   | 994  | 989            | 9.HLA*A*02:01 | 986        | 0.0397  | 0.095      | 0.049E-01   | 0.895E-01  | 0.209E-02   | 0.0397      | 0.095          | 0.0397        | 0.095    | 0.049      | 0.895          | 0.209           | TRUE         | TRUE    | TRUE     | TRUE      | TRUE      | TRUE              | TRUE   | TRUE   | TRUE   | TRUE   | TRUE   | TRUE   |
| 1 | IRGLQDQY   | 987   | 995  | 989            | 9.HLA*A*02:01 | 987        | 0.0661  | 0.1581     | 0.753E-01   | 0.761E-01  | 0.3093E-02  | 0.0661      | 0.1581         | 0.0661        | 0.1581   | 0.753      | 0.761          | 0.3093          | TRUE         | TRUE    | TRUE     | TRUE      | TRUE      | TRUE              | TRUE   | TRUE   | TRUE   | TRUE   | TRUE   | TRUE   |
| 1 | IRGLQDQY   | 988   | 996  | 989            | 9.HLA*A*02:01 | 988        | 0.0189  | 0.0449     | 0.895E-01   | 1.764E-03  | 0.2363E-02  | 0.0189      | 0.0449         | 0.0189        | 0.0449   | 0.895      | 1.757          | 0.2363          | TRUE         | TRUE    | TRUE     | TRUE      | TRUE      | TRUE              | TRUE   | TRUE   | TRUE   | TRUE   | TRUE   | TRUE   |
| 1 | IRGLQDQY   | 989   | 997  | 989            | 9.HLA*A*02:01 | 989        | 0.0323  | 0.0823     | 0.052E-02   | 0.218E-02  | 0.0091E-02  | 0.0323      | 0.0823         | 0.0323        | 0.0823   | 0.052      | 0.218          | 0.0091          | TRUE         | TRUE    | TRUE     | TRUE      | TRUE      | TRUE              | TRUE   | TRUE   | TRUE   | TRUE   | TRUE   | TRUE   |
| 1 | IRGLQDQY   | 990   | 998  | 989            | 9.HLA*A*02:01 | 990        | 0.1405  | 0.3362     | 0.903E-01   | -5.79E-01  | 0.3103E-02  | 0.1405      | 0.3362         | 0.1405        | 0.3362   | 0.903      | -5.79          | 0.3103          | TRUE         | TRUE    | TRUE     | TRUE      | TRUE      | TRUE              | TRUE   | TRUE   | TRUE   | TRUE   | TRUE   | TRUE   |
| 1 | IRGLQDQY   | 991   | 999  | 989            | 9.HLA*A*02:01 | 991        | 0.0177  | 0.0424     | 0.606E-01   | -1.50E-03  | -0.031E-02  | 0.0177      | 0.0424         | 0.0177        | 0.0424   | 0.606      | -1.496         | -0.031          | TRUE         | TRUE    | TRUE     | TRUE      | TRUE      | TRUE              | TRUE   | TRUE   | TRUE   | TRUE   | TRUE   | TRUE   |
| 1 | IRGLQDQY   | 992   | 1000 | 989            | 9.HLA*A*02:01 | 992        | 0.0327  | 0.0784     | 0.963E-01   | 0.51E-01   | 0.2155E-02  | 0.0327      | 0.0784         | 0.0327        | 0.0784   | 0.963      | 0.51           | 0.2155          | TRUE         | TRUE    | TRUE     | TRUE      | TRUE      | TRUE              | TRUE   | TRUE   | TRUE   | TRUE   | TRUE   | TRUE   |
| 1 | IRGLQDQY   | 993   | 1001 | 989            | 9.HLA*A*02:01 | 993        | 0.0468  | 0.1048     | 0.346E-01   | 0.135E-01  | 0.0564E-02  | 0.0468      | 0.1048         | 0.0468        | 0.1048   | 0.346      | 0.135          | 0.0564          | TRUE         | TRUE    | TRUE     | TRUE      | TRUE      | TRUE              | TRUE   | TRUE   | TRUE   | TRUE   | TRUE   | TRUE   |
| 1 | IRGLQDQY   | 994   | 1002 | 989            | 9.HLA*A*02:01 | 994        | 0.0799  | 0.1913     | 0.400E-01   | -4.03E-01  | 0.2312E-02  | 0.0799      | 0.1913         | 0.0799        | 0.1913   | 0.400      | -4.03          | 0.2312          | TRUE         | TRUE    | TRUE     | TRUE      | TRUE      | TRUE              | TRUE   | TRUE   | TRUE   | TRUE   | TRUE   | TRUE   |
| 1 | IRGLQDQY   | 995   | 1003 | 989            | 9.HLA*A*02:01 | 995        | 0.0206  | 0.0492     | 0.606E-01   | -1.95E-03  | -0.0499E-02 | 0.0206      | 0.0492         | 0.0206        | 0.0492   | 0.606      | -1.95          | -0.0499         | TRUE         | TRUE    | TRUE     | TRUE      | TRUE      | TRUE              | TRUE   | TRUE   | TRUE   | TRUE   | TRUE   | TRUE   |
| 1 | IRGLQDQY   | 996   | 1004 | 989            | 9.HLA*A*02:01 | 996        | 0.0659  | 0.153      | 0.0659E-01  | 0.1271E-01 | 0.0263E-02  | 0.0659      | 0.153          | 0.0659        | 0.153    | 0.127      | 0.0263         | 0.0263          | TRUE         | TRUE    | TRUE     | TRUE      | TRUE      | TRUE              | TRUE   | TRUE   | TRUE   | TRUE   | TRUE   | TRUE   |
| 1 | IRGLQDQY   | 997   | 1005 | 989            | 9.HLA*A*02:01 | 997        | 0.0714  | 0.0414     | 0.800E-03   | -1.13E-03  | 0.0034E-02  | 0.0714      | 0.0414         | 0.0714        | 0.0414   | 0.800      | -1.13          | 0.0034          | TRUE         | TRUE    | TRUE     | TRUE      | TRUE      | TRUE              | TRUE   | TRUE   | TRUE   | TRUE   | TRUE   | TRUE   |
| 1 | IRGLQDQY   | 998   | 1006 | 989            | 9.HLA*A*02:01 | 998        | 0.0519  | 0.1243     | 0.955E-01   | 1.19E-03   | 0.3329E-02  | 0.0519      | 0.1243         | 0.0519        | 0.1243   | 0.955      | 1.19           | 0.3329          | TRUE         | TRUE    | TRUE     | TRUE      | TRUE      | TRUE              | TRUE   | TRUE   | TRUE   | TRUE   | TRUE   | TRUE   |
| 1 | IRGLQDQY   | 999   | 1007 | 989            | 9.HLA*A*02:01 | 999        | 0.0345  | 0.085      | 0.0345E-01  | 0.0643E-01 | 0.0043E-02  | 0.0345      | 0.085          | 0.0345        | 0.085    | 0.0643     | 0.0043         | 0.0043          | TRUE         | TRUE    | TRUE     | TRUE      | TRUE      | TRUE              | TRUE   | TRUE   | TRUE   | TRUE   | TRUE   | TRUE   |
| 1 | IRGLQDQY   | 1000  | 1008 | 989            | 9.HLA*A*02:01 | 1000       | 0.0267  | 0.0638     | 0.375E-01   | -4.55E-01  | 0.0616E-02  | 0.0267      | 0.0638         | 0.0267        | 0.0638   | 0.375      | -4.55          | 0.0616          | TRUE         | TRUE    | TRUE     | TRUE      | TRUE      | TRUE              | TRUE   | TRUE   | TRUE   | TRUE   | TRUE   | TRUE   |
| 1 | IRGLQDQY   | 1001  | 1009 | 989            | 9.HLA*A*02:01 | 1001       | 0.0348  | 0.0832     | 0.22E-02    | -4.04E-01  | 0.0649E-02  | 0.0348      | 0.0832         | 0.0348        | 0.0832   | 0.22       | -4.04          | 0.0649          | TRUE         | TRUE    | TRUE     | TRUE      | TRUE      | TRUE              | TRUE   | TRUE   | TRUE   | TRUE   | TRUE   | TRUE   |
| 1 | IRGLQDQY   | 1002  | 1010 | 989            | 9.HLA*A*02:01 | 1002       | 0.0233  | 0.0558     | 0.70E-01    | 0.071E-01  | 0.1121E-02  | 0.0233      | 0.0558         | 0.0233        | 0.0558   | 0.70       | 0.071          | 0.1121          | TRUE         | TRUE    | TRUE     | TRUE      | TRUE      | TRUE              | TRUE   | TRUE   | TRUE   | TRUE   | TRUE   | TRUE   |
| 1 | IRGLQDQY   | 1003  | 1011 | 989            | 9.HLA*A*02:01 | 1003       | 0.0533  | 0.0797     | 0.0533E-01  | 0.0797E-01 | 0.0053E-02  | 0.0533      | 0.0797         | 0.0533        | 0.0797   | 0.0533     | 0.0797         | 0.0053          | 0.0053       | TRUE    | TRUE     | TRUE      | TRUE      | TRUE              | TRUE   | TRUE   | TRUE   | TRUE   | TRUE   | TRUE   |
| 1 | IRGLQDQY   | 1004  | 1012 | 989            | 9.HLA*A*02:01 | 1004       | 0.0977  | 0.0472     | 0.388E-01   | -2.18E-03  | -0.0598E-02 | 0.0977      | 0.0472         | 0.0977        | 0.0472   | 0.388      | -2.18          | -0.0598         | TRUE         | TRUE    | TRUE     | TRUE      | TRUE      | TRUE              | TRUE   | TRUE   | TRUE   | TRUE   | TRUE   | TRUE   |
| 1 | IRGLQDQY   | 1005  | 1013 | 989            | 9.HLA*A*02:01 | 1005       | 0.0568  | 0.1358     | 0.903E-02   | -1.34E-03  | 0.0718E-02  | 0.0568      | 0.1358         | 0.0568        | 0.1358   | 0.903      | -1.34          | 0.0718          | TRUE         | TRUE    | TRUE     | TRUE      | TRUE      | TRUE              | TRUE   | TRUE   | TRUE   | TRUE   | TRUE   | TRUE   |
| 1 | IRGLQDQY   | 1006  | 1014 | 989            | 9.HLA*A*02:01 | 1006       | 0.0465  | 0.0465     | 0.0465E-01  | 0.0465E-01 | 0.0046E-02  | 0.0465      | 0.0465         | 0.0465        | 0.0465   | 0.0465     | 0.0046         | 0.0046          | TRUE         | TRUE    | TRUE     | TRUE      | TRUE      | TRUE              | TRUE   | TRUE   | TRUE   | TRUE   | TRUE   | TRUE   |
| 1 | IRGLQDQY   | 1007  | 1019 | 989            | 9.HLA*A*02:01 | 1007       | 0.0709  | 0.2581     | 0.533E-01   | 0.523E-01  | 0.3672E-02  | 0.0709      | 0.2581         | 0.0709        | 0.2581   | 0.533      | 0.523          | 0.3672          | TRUE         | TRUE    | TRUE     | TRUE      | TRUE      | TRUE              | TRUE   | TRUE   | TRUE   | TRUE   | TRUE   | TRUE   |
| 1 | IRGLQDQY   | 1008  | 1016 | 989            | 9.HLA*A*02:01 | 1008       | 0.0481  | 0.115      | 0.701E-01   | 1.13E-03   | 0.2816E-02  | 0.0481      | 0.115          | 0.0481        | 0.115    | 0.701      | 1.13           | 0.2816          | TRUE         | TRUE    | TRUE     | TRUE      | TRUE      | TRUE              | TRUE   | TRUE   | TRUE   | TRUE   | TRUE   | TRUE   |
| 1 | IRGLQDQY   | 1009  | 1017 | 989            | 9.HLA*A*02:01 | 1009       | 0.0387  | 0.089      | 0.133E-01   | -0.12E-01  | 0.046E-02   | 0.0387      | 0.089          | 0.0387        | 0.089    | 0.133      | -0.12          | 0.046           | TRUE         | TRUE    | TRUE     | TRUE      | TRUE      | TRUE              | TRUE   | TRUE   | TRUE   | TRUE   | TRUE   | TRUE   |
| 1 | IRGLQDQY   | 1010  | 1018 | 989            | 9.HLA*A*02:01 | 1010       | 0.0347  | 0.0437     | 0.34E-02    | 1.23E-02   | 0.014E-02   | 0.0347      | 0.0437         | 0.0347        | 0.0437   | 0.34       | 1              |                 |              |         |          |           |           |                   |        |        |        |        |        |        |



| seq # | peptide   | start | end | peptide length | allele       | peptide index | NetCtLPan MH | NetCtLPan tap | NetCtLPan cleav | NetCtLPan comb | NetCtLPan per | legacy mhc | legacy tap | pre_legacy cleav | legacy combine | legacy % | rank | equal mhc | pre_legacy tap | pre_legacy cleav | equal combine | equal % | rank |
|-------|-----------|-------|-----|----------------|--------------|---------------|--------------|---------------|-----------------|----------------|---------------|------------|------------|------------------|----------------|----------|------|-----------|----------------|------------------|---------------|---------|------|
| 1     | MFPLFLT   | 1     | 9   | 9              | H:HA-A*02:01 | 1             | 0.191        | -0.43         | 0.04149         | 0.18958        | 50            | 0.191      | -0.43      | 0.04149          | 0.18958        | 50       | TRUE | TRUE      | TRUE           | TRUE             | TRUE          | TRUE    |      |
| 2     | IFLFLTL   | 2     | 10  | 9              | H:HA-A*02:01 | 2             | 0.524        | 1.126         | 0.0524          | 0.0524         | 1.5           | 0.524      | 1.126      | 0.0524           | 0.0524         | 1.5      | TRUE | TRUE      | TRUE           | TRUE             | TRUE          | TRUE    |      |
| 3     | IFLFLTL   | 3     | 11  | 9              | H:HA-A*02:01 | 3             | 0.117        | -0.602        | 0.24184         | 0.15636        | 3             | 0.117      | -0.602     | 0.24184          | 0.15636        | 3        | TRUE | TRUE      | TRUE           | TRUE             | TRUE          | TRUE    |      |
| 4     | IFLFLTL   | 4     | 12  | 9              | H:HA-A*02:01 | 4             | 0.476        | -2.294        | 0.45706         | 0.52149        | 5             | 0.476      | -2.294     | 0.45706          | 0.52149        | 5        | TRUE | TRUE      | TRUE           | TRUE             | TRUE          | TRUE    |      |
| 5     | IFLFLTL   | 5     | 13  | 9              | H:HA-A*02:01 | 5             | 0.206        | -1.365        | 0.42254         | 0.25697        | 32            | 0.206      | -1.365     | 0.42254          | 0.25697        | 32       | TRUE | TRUE      | TRUE           | TRUE             | TRUE          | TRUE    |      |
| 6     | IFLFLTL   | 6     | 14  | 9              | H:HA-A*02:01 | 6             | 1.008        | 0.04671       | 0.00609         | 0.00609        | 1             | 1.008      | 0.04671    | 0.00609          | 0.00609        | 1        | TRUE | TRUE      | TRUE           | TRUE             | TRUE          | TRUE    |      |
| 7     | IFLTLTSSD | 7     | 15  | 9              | H:HA-A*02:01 | 7             | 0.071        | -1.879        | 0.03678         | 0.0323         | 50            | 0.071      | -1.879     | 0.03678          | 0.0323         | 50       | TRUE | TRUE      | TRUE           | TRUE             | TRUE          | TRUE    |      |
| 8     | IFLTLTSSD | 8     | 16  | 9              | H:HA-A*02:01 | 8             | 0.083        | 0.85          | 0.87928         | 0.30209        | 16            | 0.083      | 0.85       | 0.87928          | 0.30209        | 16       | TRUE | TRUE      | TRUE           | TRUE             | TRUE          | TRUE    |      |
| 9     | IFLTLTSSD | 9     | 17  | 9              | H:HA-A*02:01 | 9             | 0.024        | -1.805        | 0.1261          | 0.00725        | 50            | 0.024      | -1.805     | 0.1261           | 0.00725        | 50       | TRUE | TRUE      | TRUE           | TRUE             | TRUE          | TRUE    |      |
| 10    | IFLTLTSSD | 10    | 18  | 9              | H:HA-A*02:01 | 10            | 1.473        | 0.1261        | 0.03126         | 0.03126        | 32            | 1.473      | 0.1261     | 0.03126          | 0.03126        | 32       | TRUE | TRUE      | TRUE           | TRUE             | TRUE          | TRUE    |      |
| 11    | IFLTLTSSD | 11    | 19  | 9              | H:HA-A*02:01 | 11            | 0.016        | -0.081        | 0.02337         | 0.01923        | 50            | 0.016      | -0.081     | 0.02337          | 0.01923        | 50       | TRUE | TRUE      | TRUE           | TRUE             | TRUE          | TRUE    |      |
| 12    | IFLTLTSSD | 12    | 20  | 9              | H:HA-A*02:01 | 12            | 0.011        | -0.913        | 0.04322         | -0.0021        | 50            | 0.011      | -0.913     | 0.04322          | -0.0021        | 50       | TRUE | TRUE      | TRUE           | TRUE             | TRUE          | TRUE    |      |
| 13    | IFLTLTSSD | 13    | 21  | 9              | H:HA-A*02:01 | 13            | 0.026        | -0.966        | 0.08655         | 0.02132        | 50            | 0.026      | -0.966     | 0.08655          | 0.02132        | 50       | TRUE | TRUE      | TRUE           | TRUE             | TRUE          | TRUE    |      |
| 14    | IFLTLTSSD | 14    | 22  | 9              | H:HA-A*02:01 | 14            | 0.056        | 2.268         | 0.90258         | 0.30209        | 16            | 0.056      | 2.268      | 0.90258          | 0.30209        | 16       | TRUE | TRUE      | TRUE           | TRUE             | TRUE          | TRUE    |      |
| 15    | IFLTLTSSD | 15    | 23  | 9              | H:HA-A*02:01 | 15            | 0.019        | -2.234        | 0.04825         | -0.02599       | 50            | 0.019      | -2.234     | 0.04825          | -0.02599       | 50       | TRUE | TRUE      | TRUE           | TRUE             | TRUE          | TRUE    |      |
| 16    | IFLTLTSSD | 16    | 24  | 9              | H:HA-A*02:01 | 16            | 0.007        | -2.209        | 0.02837         | -0.04184       | 50            | 0.007      | -2.209     | 0.02837          | -0.04184       | 50       | TRUE | TRUE      | TRUE           | TRUE             | TRUE          | TRUE    |      |
| 17    | IFLTLTSSD | 17    | 25  | 9              | H:HA-A*02:01 | 17            | 0.011        | 0.262         | 0.5907          | 0.15046        | 50            | 0.011      | 0.262      | 0.5907           | 0.15046        | 50       | TRUE | TRUE      | TRUE           | TRUE             | TRUE          | TRUE    |      |
| 18    | IFLTLTSSD | 18    | 26  | 9              | H:HA-A*02:01 | 18            | 0.006        | 0.016         | 0.02536         | 0.00176        | 50            | 0.006      | 0.016      | 0.02536          | 0.00176        | 50       | TRUE | TRUE      | TRUE           | TRUE             | TRUE          | TRUE    |      |
| 19    | IFLTLTSSD | 19    | 27  | 9              | H:HA-A*02:01 | 19            | 0.073        | -0.502        | 0.16952         | 0.08959        | 50            | 0.073      | -0.502     | 0.16952          | 0.08959        | 50       | TRUE | TRUE      | TRUE           | TRUE             | TRUE          | TRUE    |      |
| 20    | IFLTLTSSD | 20    | 28  | 9              | H:HA-A*02:01 | 20            | 0.028        | 0.167         | 0.14052         | 0.06379        | 50            | 0.028      | 0.167      | 0.14052          | 0.06379        | 50       | TRUE | TRUE      | TRUE           | TRUE             | TRUE          | TRUE    |      |
| 21    | IFLTLTSSD | 21    | 29  | 9              | H:HA-A*02:01 | 21            | 0.028        | -1.335        | 0.12355         | 0.02242        | 50            | 0.028      | -1.335     | 0.12355          | 0.02242        | 50       | TRUE | TRUE      | TRUE           | TRUE             | TRUE          | TRUE    |      |
| 22    | IFLTLTSSD | 22    | 30  | 9              | H:HA-A*02:01 | 22            | 0.016        | 0.04843       | 0.02328         | 0.02328        | 32            | 0.016      | 0.04843    | 0.02328          | 0.02328        | 32       | TRUE | TRUE      | TRUE           | TRUE             | TRUE          | TRUE    |      |
| 23    | IFLTLTSSD | 23    | 31  | 9              | H:HA-A*02:01 | 23            | 0.008        | -1.356        | 0.05004         | -0.01464       | 50            | 0.008      | -1.356     | 0.05004          | -0.01464       | 50       | TRUE | TRUE      | TRUE           | TRUE             | TRUE          | TRUE    |      |
| 24    | IFLTLTSSD | 24    | 32  | 9              | H:HA-A*02:01 | 24            | 0.014        | -0.454        | 0.61409         | 0.14082        | 50            | 0.014      | -0.454     | 0.61409          | 0.14082        | 50       | TRUE | TRUE      | TRUE           | TRUE             | TRUE          | TRUE    |      |
| 25    | IFLTLTSSD | 25    | 33  | 9              | H:HA-A*02:01 | 25            | 0.044        | -0.52         | 0.41801         | 0.17209        | 50            | 0.044      | -0.52      | 0.41801          | 0.17209        | 50       | TRUE | TRUE      | TRUE           | TRUE             | TRUE          | TRUE    |      |
| 26    | IFLTLTSSD | 26    | 34  | 9              | H:HA-A*02:01 | 26            | 0.068        | 0.15387       | 0.02957         | 0.02957        | 32            | 0.068      | 0.15387    | 0.02957          | 0.02957        | 32       | TRUE | TRUE      | TRUE           | TRUE             | TRUE          | TRUE    |      |
| 27    | IFLTLTSSD | 27    | 35  | 9              | H:HA-A*02:01 | 27            | 0.014        | -2.549        | 0.26564         | 0.01004        | 50            | 0.014      | -2.549     | 0.26564          | 0.01004        | 50       | TRUE | TRUE      | TRUE           | TRUE             | TRUE          | TRUE    |      |
| 28    | IFLTLTSSD | 28    | 36  | 9              | H:HA-A*02:01 | 28            | 0.007        | -2.537        | 0.04883         | -0.04544       | 50            | 0.007      | -2.537     | 0.04883          | -0.04544       | 50       | TRUE | TRUE      | TRUE           | TRUE             | TRUE          | TRUE    |      |
| 29    | IFLTLTSSD | 29    | 37  | 9              | H:HA-A*02:01 | 29            | 0.023        | 0.425         | 0.94026         | 0.24518        | 32            | 0.023      | 0.425      | 0.94026          | 0.24518        | 32       | TRUE | TRUE      | TRUE           | TRUE             | TRUE          | TRUE    |      |
| 30    | IFLTLTSSD | 30    | 38  | 9              | H:HA-A*02:01 | 30            | 0.012        | 0.41552       | 0.05454         | 0.05454        | 32            | 0.012      | 0.41552    | 0.05454          | 0.05454        | 32       | TRUE | TRUE      | TRUE           | TRUE             | TRUE          | TRUE    |      |
| 31    | IFLTLTSSD | 31    | 39  | 9              | H:HA-A*02:01 | 31            | 0.016        | -1.363        | 0.04799         | -0.00728       | 50            | 0.016      | -1.363     | 0.04799          | -0.00728       | 50       | TRUE | TRUE      | TRUE           | TRUE             | TRUE          | TRUE    |      |
| 32    | IFLTLTSSD | 32    | 40  | 9              | H:HA-A*02:01 | 32            | 0.022        | 0.309         | 0.10921         | 0.0543         | 50            | 0.022      | 0.309      | 0.10921          | 0.0543         | 50       | TRUE | TRUE      | TRUE           | TRUE             | TRUE          | TRUE    |      |
| 33    | IFLTLTSSD | 33    | 41  | 9              | H:HA-A*02:01 | 33            | 0.035        | 2.759         | 0.57864         | 0.23431        | 32            | 0.035      | 2.759      | 0.57864          | 0.23431        | 32       | TRUE | TRUE      | TRUE           | TRUE             | TRUE          | TRUE    |      |
| 34    | IFLTLTSSD | 34    | 42  | 9              | H:HA-A*02:01 | 34            | 0.017        | 0.24741       | 0.03962         | 0.03962        | 32            | 0.017      | 0.24741    | 0.03962          | 0.03962        | 32       | TRUE | TRUE      | TRUE           | TRUE             | TRUE          | TRUE    |      |
| 35    | IFLTLTSSD | 35    | 43  | 9              | H:HA-A*02:01 | 35            | 0.063        | 0.273         | 0.03909         | 0.07862        | 50            | 0.063      | 0.273      | 0.03909          | 0.07862        | 50       | TRUE | TRUE      | TRUE           | TRUE             | TRUE          | TRUE    |      |
| 36    | IFLTLTSSD | 36    | 44  | 9              | H:HA-A*02:01 | 36            | 0.071        | -1.538        | 0.1207          | 0.05971        | 50            | 0.071      | -1.538     | 0.1207           | 0.05971        | 50       | TRUE | TRUE      | TRUE           | TRUE             | TRUE          | TRUE    |      |
| 37    | IFLTLTSSD | 37    | 45  | 9              | H:HA-A*02:01 | 37            | 0.007        | -1.421        | 0.05946         | -0.05965       | 50            | 0.007      | -1.421     | 0.05946          | -0.05965       | 50       | TRUE | TRUE      | TRUE           | TRUE             | TRUE          | TRUE    |      |
| 38    | IFLTLTSSD | 38    | 46  | 9              | H:HA-A*02:01 | 38            | 0.026        | 0.42986       | 0.02187         | 0.02187        | 32            | 0.026      | 0.42986    | 0.02187          | 0.02187        | 32       | TRUE | TRUE      | TRUE           | TRUE             | TRUE          | TRUE    |      |
| 39    | IFLTLTSSD | 39    | 47  | 9              | H:HA-A*02:01 | 39            | 0.06         | 2.813         | 0.59066         | 0.26322        | 32            | 0.06       | 2.813      | 0.59066          | 0.26322        | 32       | TRUE | TRUE      | TRUE           | TRUE             | TRUE          | TRUE    |      |
| 40    | IFLTLTSSD | 40    | 48  | 9              | H:HA-A*02:01 | 40            | 0.032        | 1.968         | 0.40169         | 0.17158        | 50            | 0.032      | 1.968      | 0.40169          | 0.17158        | 50       | TRUE | TRUE      | TRUE           | TRUE             | TRUE          | TRUE    |      |
| 41    | IFLTLTSSD | 41    | 49  | 9              | H:HA-A*02:01 | 41            | 0.064        | -1.969        | 0.20582         | 0.06108        | 50            | 0.064      | -1.969     | 0.20582          | 0.06108        | 50       | TRUE | TRUE      | TRUE           | TRUE             | TRUE          | TRUE    |      |
| 42    | IFLTLTSSD | 42    | 50  | 9              | H:HA-A*02:01 | 42            | 0.024        | 0.27124       | 0.03862         | 0.03862        | 32            | 0.024      | 0.27124    | 0.03862          | 0.03862        | 32       | TRUE | TRUE      | TRUE           | TRUE             | TRUE          | TRUE    |      |
| 43    | IFLTLTSSD | 43    | 51  | 9              | H:HA-A*02:01 | 43            | 0.005        | -1.689        | 0.02455         | -0.0317        | 50            | 0.005      | -1.689     | 0.02455          | -0.0317        | 50       | TRUE | TRUE      | TRUE           | TRUE             | TRUE          | TRUE    |      |
| 44    | IFLTLTSSD | 44    | 52  | 9              | H:HA-A*02:01 | 44            | 0.024        | 0.427         | 0.95499         | 0.24955        | 32            | 0.024      | 0.427      | 0.95499          | 0.24955        | 32       | TRUE | TRUE      | TRUE           | TRUE             | TRUE          | TRUE    |      |
| 45    | IFLTLTSSD | 45    | 53  | 9              | H:HA-A*02:01 | 45            | 0.042        | 2.822         | 0.96165         | 0.32892        | 16            | 0.042      | 2.822      | 0.96165          | 0.32892        | 16       | TRUE | TRUE      | TRUE           | TRUE             | TRUE          | TRUE    |      |
| 46    | IFLTLTSSD | 46    | 54  | 9              | H:HA-A*02:01 | 46            | 0.009        | 0.00725       | 0.03282         | 0.03282        | 16            | 0.009      | 0.00725    | 0.03282          | 0.03282        | 16       | TRUE | TRUE      | TRUE           | TRUE             | TRUE          | TRUE    |      |
| 47    | IFLTLTSSD | 47    | 55  | 9              | H:HA-A*02:01 | 47            | 0.092        | -0.589        | 0.12276         | 0.1049         | 50            | 0.092      | -0.589     | 0.12276          | 0.1049         | 50       | TRUE | TRUE      | TRUE           | TRUE             | TRUE          | TRUE    |      |
| 48    | IFLTLTSSD | 48    | 56  | 9              | H:HA-A*02:01 | 48            | 0.03         | -0.102        | 0.21295         | 0.07536        | 50            | 0.03       | -0.102     | 0.21295          | 0.07536        | 50       | TRUE | TRUE      | TRUE           | TRUE             | TRUE          | TRUE    |      |
| 49    | IFLTLTSSD | 49    | 57  | 9              | H:HA-A*02:01 | 49            | 0.011        | -1.974        | 0.056           | -0.02575       | 50            | 0.011      | -1.974     | 0.056            | -0.02575       | 50       | TRUE | TRUE      | TRUE           | TRUE             | TRUE          | TRUE    |      |
| 50    | IFLTLTSSD | 50    | 58  | 9              | H:HA-A*02:01 | 50            | 0.089        | 0.2036        | 0.22955         | 0.22955        | 32            | 0.089      | 0.2036     | 0.22955          | 0.22955        | 32       | TRUE | TRUE      | TRUE           | TRUE             | TRUE          | TRUE    |      |
| 51    | IFLTLTSSD | 51    | 59  | 9              | H:HA-A*02:01 | 51            | 0.146        | 2.581         | 0.19505         | 0.25441        | 32            | 0.146      | 2.581      | 0.19505          | 0.25441        | 32       | TRUE | TRUE      | TRUE           | TRUE             | TRUE          | TRUE    |      |
| 52    | IFLTLTSSD | 52    | 60  | 9              | H:HA-A*02:01 | 52            | 0.092        | 1.251         | 0.53681         | 0.24406        | 32            | 0.092      | 1.251      | 0.53681          | 0.24406        | 32       | TRUE | TRUE      | TRUE           | TRUE             | TRUE          | TRUE    |      |
| 53    | IFLTLTSSD | 53    | 61  | 9              | H:HA-A*02:01 | 53            | 0.318        | 0.116         | 0.04381         | 0.13076        | 16            | 0.318      | 0.116      | 0.04381          | 0.13076        | 16       | TRUE | TRUE      | TRUE           | TRUE             | TRUE          | TRUE    |      |
| 54    | IFLTLTSSD | 54    | 62  | 9              | H:HA-A*02:01 | 54            | 2.413        | 0.1086        | 0.03187         | 0.03187        | 11            | 2.413      | 0.1086     | 0.03187          | 0.03187        | 11       | TRUE | TRUE      | TRUE           | TRUE             | TRUE          | TRUE    |      |
| 55    | IFLTLTSSD | 55    | 63  | 9              | H:HA-A*02:01 | 55            | 0.097        | 2.851         | 0.81253         | 0.35109        | 10            | 0.097      | 2.851      | 0.81253          | 0.35109        | 10       | TRUE | TRUE      | TRUE           | TRUE             | TRUE          | TRUE    |      |
| 56    | IFLTLTSSD | 56    | 64  | 9              | H:HA-A*02:01 | 56            | 0.032        | -2.512        | 0.03554         | -0.0228        | 50            | 0.032      | -2.512     | 0.03554          | -0.0228        | 50       | TRUE | TRUE      | TRUE           | TRUE             | TRUE          | TRUE    |      |
| 57    | IFLTLTSSD | 57    | 65  | 9              | H:HA-A*02:01 | 57            | 0.048        | -1.549        | 0.18816         | 0.05161        | 50            | 0.048      | -1.549     | 0.18816          | 0.05161        | 50       | TRUE | TRUE      | TRUE           | TRUE             | TRUE          | TRUE    |      |
| 58    | IFLTLTSSD | 58    | 66  | 9              | H:HA-A*02:01 | 58            | 0.385        | 0.41538       | 0.44648         | 0.44648        | 6             | 0.385      | 0.41538    | 0.44648          | 0.44648        | 6        | TRUE | TRUE      | TRUE           | TRUE             | TRUE          | TRUE    |      |
| 59    | IFLTLTSSD | 59    | 67  | 9              | H:HA-A*02:01 | 59            | 0.522        | -0.748        | 0.29272         | 0.56916        | 4             | 0.522      | -0.748     | 0.29272          | 0.56916        | 4        | TRUE | TRUE      | TRUE           | TRUE             | TRUE          | TRUE    |      |
| 60    | IFLTLTSSD | 60    | 68  | 9              | H:HA-A*02:01 | 60            | 0.018        | -1.689        | 0.30645         | 0.04473        | 50            | 0.018      | -1.689     | 0.30645          | 0.04473        | 50       | TRUE | TRUE      | TRUE           | TRUE             | TRUE          | TRUE    |      |
| 61    |           |       |     |                |              |               |              |               |                 |                |               |            |            |                  |                |          |      |           |                |                  |               |         |      |

| seq # | peptide    | start | end | peptide length | allele      | peptide index | NetCTLpan MH | NetCTLpan tap | NetCTLpan cleave | NetCTLpan con | NetCTLpan per | legacy mhc | legacy tap | legacy cleave | legacy combine | legacy % | rank | equal mhc | prequal | tap  | prequal | cleavage | equal | combine | equal % | rank |
|-------|------------|-------|-----|----------------|-------------|---------------|--------------|---------------|------------------|---------------|---------------|------------|------------|---------------|----------------|----------|------|-----------|---------|------|---------|----------|-------|---------|---------|------|
| 1     | MIFNANFNC  | 151   | 159 | 9              | HLA-A*02:01 | 151           | 0.434        | 0.312         | 0.60022          | 0.45535       | 50            | 0.434      | 0.312      | 0.60022       | 0.45535        | 6        | TRUE | TRUE      | TRUE    | TRUE | TRUE    | TRUE     | TRUE  | TRUE    | TRUE    | TRUE |
| 1     | IFDNANFNC  | 151   | 160 | 10             | HLA-A*02:01 | 151           | 0.065        | 0.065         | 0.06503          | 0.06503       | 50            | 0.065      | 0.065      | 0.06503       | 0.06503        | 50       | TRUE | TRUE      | TRUE    | TRUE | TRUE    | TRUE     | TRUE  | TRUE    | TRUE    | TRUE |
| 1     | FNANFCTFE  | 153   | 161 | 9              | HLA-A*02:01 | 153           | 0.061        | 2.047         | 0.74745          | 0.26299       | 32            | 0.061      | 2.047      | 0.74745       | 0.26299        | 32       | TRUE | TRUE      | TRUE    | TRUE | TRUE    | TRUE     | TRUE  | TRUE    | TRUE    | TRUE |
| 1     | FNANFCTFE  | 154   | 162 | 9              | HLA-A*02:01 | 154           | 0.006        | 2.122         | 0.025            | -0.04142      | 50            | 0.006      | 2.122      | 0.025         | -0.04142       | 50       | TRUE | TRUE      | TRUE    | TRUE | TRUE    | TRUE     | TRUE  | TRUE    | TRUE    | TRUE |
| 1     | FNANFCTFE  | 155   | 163 | 9              | HLA-A*02:01 | 155           | 0.104        | 2.987         | 0.59077          | 0.3926        | 8             | 0.104      | 2.987      | 0.59077       | 0.3926         | 8        | TRUE | TRUE      | TRUE    | TRUE | TRUE    | TRUE     | TRUE  | TRUE    | TRUE    | TRUE |
| 1     | FNCTFEYV   | 156   | 164 | 9              | HLA-A*02:01 | 156           | 0.187        | 0.893         | 0.27176          | 0.1789        | 33            | 0.187      | 0.893      | 0.27176       | 0.1789         | 33       | TRUE | TRUE      | TRUE    | TRUE | TRUE    | TRUE     | TRUE  | TRUE    | TRUE    | TRUE |
| 1     | FNCTFEYV   | 157   | 165 | 9              | HLA-A*02:01 | 157           | 0.021        | -2.33         | 0.02433          | -0.03178      | 50            | 0.021      | -2.33      | 0.02433       | -0.03178       | 50       | TRUE | TRUE      | TRUE    | TRUE | TRUE    | TRUE     | TRUE  | TRUE    | TRUE    | TRUE |
| 1     | NCTFEYVSD  | 158   | 166 | 9              | HLA-A*02:01 | 158           | 0.007        | -1.899        | 0.03351          | -0.03294      | 50            | 0.007      | -1.899     | 0.03351       | -0.03294       | 50       | TRUE | TRUE      | TRUE    | TRUE | TRUE    | TRUE     | TRUE  | TRUE    | TRUE    | TRUE |
| 1     | CTFEYVSDA  | 159   | 167 | 9              | HLA-A*02:01 | 159           | 0.312        | -0.345        | 0.68018          | 0.45462       | 6             | 0.312      | -0.345     | 0.68018       | 0.45462        | 6        | TRUE | TRUE      | TRUE    | TRUE | TRUE    | TRUE     | TRUE  | TRUE    | TRUE    | TRUE |
| 1     | CTFEYVSDA  | 160   | 168 | 9              | HLA-A*02:01 | 160           | 0.042        | 0.163         | 0.42409          | 0.20067       | 33            | 0.042      | 0.163      | 0.42409       | 0.20067        | 33       | TRUE | TRUE      | TRUE    | TRUE | TRUE    | TRUE     | TRUE  | TRUE    | TRUE    | TRUE |
| 1     | FEYVSDAFS  | 161   | 169 | 9              | HLA-A*02:01 | 161           | 0.034        | -2.279        | 0.02449          | -0.03746      | 50            | 0.034      | -2.279     | 0.02449       | -0.03746       | 50       | TRUE | TRUE      | TRUE    | TRUE | TRUE    | TRUE     | TRUE  | TRUE    | TRUE    | TRUE |
| 1     | YVSDAFSLD  | 162   | 170 | 9              | HLA-A*02:01 | 162           | 0.061        | 0.979         | 0.9739           | 0.3046        | 16            | 0.061      | 0.979      | 0.9739        | 0.3046         | 16       | TRUE | TRUE      | TRUE    | TRUE | TRUE    | TRUE     | TRUE  | TRUE    | TRUE    | TRUE |
| 1     | YVSDAFSLD  | 163   | 171 | 9              | HLA-A*02:01 | 163           | 0.107        | -1.878        | 0.06776          | 0.0753        | 50            | 0.107      | -1.878     | 0.06776       | 0.0753         | 50       | TRUE | TRUE      | TRUE    | TRUE | TRUE    | TRUE     | TRUE  | TRUE    | TRUE    | TRUE |
| 1     | ISDAFSLD   | 164   | 172 | 9              | HLA-A*02:01 | 164           | 0.325        | 0.15          | 0.9316           | 0.53189       | 5             | 0.325      | 0.15       | 0.9316        | 0.53189        | 5        | TRUE | TRUE      | TRUE    | TRUE | TRUE    | TRUE     | TRUE  | TRUE    | TRUE    | TRUE |
| 1     | SDAFSLDVS  | 165   | 173 | 9              | HLA-A*02:01 | 165           | 0.04         | -2.474        | 0.02762          | -0.04163      | 50            | 0.04       | -2.474     | 0.02762       | -0.04163       | 50       | TRUE | TRUE      | TRUE    | TRUE | TRUE    | TRUE     | TRUE  | TRUE    | TRUE    | TRUE |
| 1     | DAFSLDVSSE | 166   | 174 | 9              | HLA-A*02:01 | 166           | 0.013        | -1.663        | 0.03023          | -0.02177      | 50            | 0.013      | -1.663     | 0.03023       | -0.02177       | 50       | TRUE | TRUE      | TRUE    | TRUE | TRUE    | TRUE     | TRUE  | TRUE    | TRUE    | TRUE |
| 1     | AFSLDVSKE  | 167   | 175 | 9              | HLA-A*02:01 | 167           | 0.018        | 0.633         | 0.90282          | 0.23696       | 32            | 0.018      | 0.633      | 0.90282       | 0.23696        | 32       | TRUE | TRUE      | TRUE    | TRUE | TRUE    | TRUE     | TRUE  | TRUE    | TRUE    | TRUE |
| 1     | FLSDVSKE   | 168   | 176 | 9              | HLA-A*02:01 | 168           | 0.074        | 2.128         | 0.04952          | 0.03093       | 50            | 0.074      | 2.128      | 0.04952       | 0.03093        | 50       | TRUE | TRUE      | TRUE    | TRUE | TRUE    | TRUE     | TRUE  | TRUE    | TRUE    | TRUE |
| 1     | SLDVSKEG   | 169   | 177 | 9              | HLA-A*02:01 | 169           | 0.035        | -1.604        | 0.11646          | 0.0211        | 50            | 0.035      | -1.604     | 0.11646       | 0.0211         | 50       | TRUE | TRUE      | TRUE    | TRUE | TRUE    | TRUE     | TRUE  | TRUE    | TRUE    | TRUE |
| 1     | LDVSKEGN   | 170   | 178 | 9              | HLA-A*02:01 | 170           | 0.004        | -1.487        | 0.02527          | -0.02749      | 50            | 0.004      | -1.487     | 0.02527       | -0.02749       | 50       | TRUE | TRUE      | TRUE    | TRUE | TRUE    | TRUE     | TRUE  | TRUE    | TRUE    | TRUE |
| 1     | DVSESGNFT  | 171   | 179 | 9              | HLA-A*02:01 | 171           | 0.019        | 2.401         | 0.66953          | 0.27967       | 32            | 0.019      | 2.401      | 0.66953       | 0.27967        | 32       | TRUE | TRUE      | TRUE    | TRUE | TRUE    | TRUE     | TRUE  | TRUE    | TRUE    | TRUE |
| 1     | VSESGNFTK  | 172   | 180 | 9              | HLA-A*02:01 | 172           | 0.011        | 0.284         | 0.15922          | 0.05392       | 50            | 0.011      | 0.284      | 0.15922       | 0.05392        | 50       | TRUE | TRUE      | TRUE    | TRUE | TRUE    | TRUE     | TRUE  | TRUE    | TRUE    | TRUE |
| 1     | SEKSGNFHKL | 173   | 181 | 9              | HLA-A*02:01 | 173           | 0.009        | -0.573        | 0.25036          | 0.05101       | 50            | 0.009      | -0.573     | 0.25036       | 0.05101        | 50       | TRUE | TRUE      | TRUE    | TRUE | TRUE    | TRUE     | TRUE  | TRUE    | TRUE    | TRUE |
| 1     | EKSGNFHKL  | 174   | 182 | 9              | HLA-A*02:01 | 174           | 0.014        | 0.85          | 0.85005          | 0.22651       | 32            | 0.014      | 0.85       | 0.85005       | 0.22651        | 32       | TRUE | TRUE      | TRUE    | TRUE | TRUE    | TRUE     | TRUE  | TRUE    | TRUE    | TRUE |
| 1     | VKSGNFHKL  | 175   | 183 | 9              | HLA-A*02:01 | 175           | 0.031        | 1.302         | 0.27155          | 0.1134        | 50            | 0.031      | 1.302      | 0.27155       | 0.1134         | 50       | TRUE | TRUE      | TRUE    | TRUE | TRUE    | TRUE     | TRUE  | TRUE    | TRUE    | TRUE |
| 1     | GNFNFHKL   | 176   | 184 | 9              | HLA-A*02:01 | 176           | 0.031        | 1.302         | 0.27155          | 0.1134        | 50            | 0.031      | 1.302      | 0.27155       | 0.1134         | 50       | TRUE | TRUE      | TRUE    | TRUE | TRUE    | TRUE     | TRUE  | TRUE    | TRUE    | TRUE |
| 1     | GNFNFHKL   | 177   | 185 | 9              | HLA-A*02:01 | 177           | 0.027        | 2.369         | 0.37683          | 0.17101       | 50            | 0.027      | 2.369      | 0.37683       | 0.17101        | 50       | TRUE | TRUE      | TRUE    | TRUE | TRUE    | TRUE     | TRUE  | TRUE    | TRUE    | TRUE |
| 1     | NFNFHKL    | 178   | 186 | 9              | HLA-A*02:01 | 178           | 0.047        | 0.487         | 0.09425          | 0.08038       | 50            | 0.047      | 0.487      | 0.09425       | 0.08038        | 50       | TRUE | TRUE      | TRUE    | TRUE | TRUE    | TRUE     | TRUE  | TRUE    | TRUE    | TRUE |
| 1     | NFNFHKL    | 179   | 187 | 9              | HLA-A*02:01 | 179           | 0.027        | 2.66          | 0.50584          | 0.21744       | 32            | 0.027      | 2.66       | 0.50584       | 0.21744        | 32       | TRUE | TRUE      | TRUE    | TRUE | TRUE    | TRUE     | TRUE  | TRUE    | TRUE    | TRUE |
| 1     | NFNFHKL    | 180   | 188 | 9              | HLA-A*02:01 | 180           | 0.124        | 0.162         | 0.11886          | 0.31479       | 16            | 0.124      | 0.162      | 0.11886       | 0.31479        | 16       | TRUE | TRUE      | TRUE    | TRUE | TRUE    | TRUE     | TRUE  | TRUE    | TRUE    | TRUE |
| 1     | NFNFHKL    | 181   | 189 | 9              | HLA-A*02:01 | 181           | 0.09         | -1.237        | 0.06685          | 0.07412       | 50            | 0.09       | -1.237     | 0.06685       | 0.07412        | 50       | TRUE | TRUE      | TRUE    | TRUE | TRUE    | TRUE     | TRUE  | TRUE    | TRUE    | TRUE |
| 1     | NFNFHKL    | 182   | 190 | 9              | HLA-A*02:01 | 182           | 0.01         | 0.508         | 0.5457           | 0.14548       | 50            | 0.01       | 0.508      | 0.5457        | 0.14548        | 50       | TRUE | TRUE      | TRUE    | TRUE | TRUE    | TRUE     | TRUE  | TRUE    | TRUE    | TRUE |
| 1     | NFNFHKL    | 183   | 191 | 9              | HLA-A*02:01 | 183           | 0.012        | -1.547        | 0.03765          | -0.0182       | 50            | 0.012      | -1.547     | 0.03765       | -0.0182        | 50       | TRUE | TRUE      | TRUE    | TRUE | TRUE    | TRUE     | TRUE  | TRUE    | TRUE    | TRUE |
| 1     | NFNFHKL    | 184   | 192 | 9              | HLA-A*02:01 | 184           | 0.027        | 2.369         | 0.37683          | 0.17101       | 50            | 0.027      | 2.369      | 0.37683       | 0.17101        | 50       | TRUE | TRUE      | TRUE    | TRUE | TRUE    | TRUE     | TRUE  | TRUE    | TRUE    | TRUE |
| 1     | NFNFHKL    | 185   | 193 | 9              | HLA-A*02:01 | 185           | 0.092        | 2.523         | 0.09857          | 0.17725       | 50            | 0.092      | 2.523      | 0.09857       | 0.17725        | 50       | TRUE | TRUE      | TRUE    | TRUE | TRUE    | TRUE     | TRUE  | TRUE    | TRUE    | TRUE |
| 1     | NFNFHKL    | 186   | 194 | 9              | HLA-A*02:01 | 186           | 0.037        | 1.077         | 0.4415           | 0.16326       | 50            | 0.037      | 1.077      | 0.4415        | 0.16326        | 50       | TRUE | TRUE      | TRUE    | TRUE | TRUE    | TRUE     | TRUE  | TRUE    | TRUE    | TRUE |
| 1     | NFNFHKL    | 187   | 195 | 9              | HLA-A*02:01 | 187           | 0.031        | 2.832         | 0.53022          | 0.2211        | 32            | 0.031      | 2.832      | 0.53022       | 0.2211         | 32       | TRUE | TRUE      | TRUE    | TRUE | TRUE    | TRUE     | TRUE  | TRUE    | TRUE    | TRUE |
| 1     | NFNFHKL    | 188   | 196 | 9              | HLA-A*02:01 | 188           | 0.124        | 0.162         | 0.11886          | 0.31479       | 16            | 0.124      | 0.162      | 0.11886       | 0.31479        | 16       | TRUE | TRUE      | TRUE    | TRUE | TRUE    | TRUE     | TRUE  | TRUE    | TRUE    | TRUE |
| 1     | NFNFHKL    | 189   | 197 | 9              | HLA-A*02:01 | 189           | 0.045        | 2.936         | 0.97652          | 0.33812       | 16            | 0.045      | 2.936      | 0.97652       | 0.33812        | 16       | TRUE | TRUE      | TRUE    | TRUE | TRUE    | TRUE     | TRUE  | TRUE    | TRUE    | TRUE |
| 1     | NFNFHKL    | 190   | 198 | 9              | HLA-A*02:01 | 190           | 0.024        | 0.242         | 0.56138          | 0.15636       | 50            | 0.024      | 0.242      | 0.56138       | 0.15636        | 50       | TRUE | TRUE      | TRUE    | TRUE | TRUE    | TRUE     | TRUE  | TRUE    | TRUE    | TRUE |
| 1     | NFNFHKL    | 191   | 199 | 9              | HLA-A*02:01 | 191           | 0.017        | -1.765        | 0.11105          | -0.00214      | 50            | 0.017      | -1.765     | 0.11105       | -0.00214       | 50       | TRUE | TRUE      | TRUE    | TRUE | TRUE    | TRUE     | TRUE  | TRUE    | TRUE    | TRUE |
| 1     | NFNFHKL    | 192   | 200 | 9              | HLA-A*02:01 | 192           | 0.03         | 2.792         | 0.80486          | 0.35291       | 50            | 0.03       | 2.792      | 0.80486       | 0.35291        | 50       | TRUE | TRUE      | TRUE    | TRUE | TRUE    | TRUE     | TRUE  | TRUE    | TRUE    | TRUE |
| 1     | NFNFHKL    | 193   | 201 | 9              | HLA-A*02:01 | 193           | 0.221        | -0.024        | 0.03004          | 0.22716       | 32            | 0.221      | -0.024     | 0.03004       | 0.22716        | 32       | TRUE | TRUE      | TRUE    | TRUE | TRUE    | TRUE     | TRUE  | TRUE    | TRUE    | TRUE |
| 1     | NFNFHKL    | 194   | 202 | 9              | HLA-A*02:01 | 194           | 0.014        | 0.346         | 0.0281           | 0.02897       | 50            | 0.014      | 0.346      | 0.0281        | 0.02897        | 50       | TRUE | TRUE      | TRUE    | TRUE | TRUE    | TRUE     | TRUE  | TRUE    | TRUE    | TRUE |
| 1     | NFNFHKL    | 195   | 203 | 9              | HLA-A*02:01 | 195           | 0.889        | 0.888         | 0.54815          | 0.92453       | 0.8           | 0.889      | 0.888      | 0.54815       | 0.92453        | 0.8      | TRUE | TRUE      | TRUE    | TRUE | TRUE    | TRUE     | TRUE  | TRUE    | TRUE    | TRUE |
| 1     | NFNFHKL    | 196   | 204 | 9              | HLA-A*02:01 | 196           | 0.543        | 0.543         | 0.001740         | 0.001740      | 50            | 0.543      | 0.543      | 0.001740      | 0.001740       | 50       | TRUE | TRUE      | TRUE    | TRUE | TRUE    | TRUE     | TRUE  | TRUE    | TRUE    | TRUE |
| 1     | NFNFHKL    | 197   | 205 | 9              | HLA-A*02:01 | 197           | 0.044        | 0.228         | 0.57307          | 0.17864       | 50            | 0.044      | 0.228      | 0.57307       | 0.17864        | 50       | TRUE | TRUE      | TRUE    | TRUE | TRUE    | TRUE     | TRUE  | TRUE    | TRUE    | TRUE |
| 1     | NFNFHKL    | 198   | 206 | 9              | HLA-A*02:01 | 198           | 0.138        | 0.29          | 0.6634           | 0.29452       | 16            | 0.138      | 0.29       | 0.6634        | 0.29452        | 16       | TRUE | TRUE      | TRUE    | TRUE | TRUE    | TRUE     | TRUE  | TRUE    | TRUE    | TRUE |
| 1     | NFNFHKL    | 199   | 207 | 9              | HLA-A*02:01 | 199           | 0.022        | 1.639         | 0.95268          | 0.27733       | 32            | 0.022      | 1.639      | 0.95268       | 0.27733        | 32       | TRUE | TRUE      | TRUE    | TRUE | TRUE    | TRUE     | TRUE  | TRUE    | TRUE    | TRUE |
| 1     | NFNFHKL    | 200   | 208 | 9              | HLA-A*02:01 | 200           | 0.885        | 0.885         | 0.00925          | 0.00925       | 50            | 0.885      | 0.885      | 0.00925       | 0.00925        | 50       | TRUE | TRUE      | TRUE    | TRUE | TRUE    | TRUE     | TRUE  | TRUE    | TRUE    | TRUE |
| 1     | NFNFHKL    | 201   | 209 | 9              | HLA-A*02:01 | 201           | 0.035        | 0.68          | 0.92822          | 0.26085       | 32            | 0.035      | 0.68       | 0.92822       | 0.26085        | 32       | TRUE | TRUE      | TRUE    | TRUE | TRUE    | TRUE     | TRUE  | TRUE    | TRUE    | TRUE |
| 1     | NFNFHKL    | 202   | 210 | 9              | HLA-A*02:01 | 202           | 0.008        | -0.472        | 0.02605          | 0.00206       | 50            | 0.008      | -0.472     | 0.02605       | 0.00206        | 50       | TRUE | TRUE      | TRUE    | TRUE | TRUE    | TRUE     | TRUE  | TRUE    | TRUE    | TRUE |
| 1     | NFNFHKL    | 203   | 211 | 9              | HLA-A*02:01 | 203           | 0.012        | -2.597        | 0.03213          | -0.04057      | 50            | 0.012      | -2.597     | 0.03213       | -0.04057       | 50       | TRUE | TRUE      | TRUE    | TRUE | TRUE    | TRUE     | TRUE  | TRUE    | TRUE    | TRUE |
| 1     | NFNFHKL    | 204   | 212 | 9              | HLA-A*02:01 | 204           | 0.012        | -2.597        | 0.03213          | -0.04057      | 50            | 0.012      | -2.597     | 0.03213       | -0.04057       | 50       | TRUE | TRUE      | TRUE    |      |         |          |       |         |         |      |





| seq # | peptide     | start | end | peptide length | allele      | peptide index | NetCTLpan MH | NetCTLpan TAP | NetCTLpan clean | NetCTLpan con | NetCTLpan per | legacy mhc | legacy tap | pre_legacy cleavage | legacy combine | legacy % | rank | equal mhc | pre_legacy tap | pre_legacy cleavage | equal combine | equal % | rank |
|-------|-------------|-------|-----|----------------|-------------|---------------|--------------|---------------|-----------------|---------------|---------------|------------|------------|---------------------|----------------|----------|------|-----------|----------------|---------------------|---------------|---------|------|
| 1     | LVNCTDSTA   | 601   | 609 | 9              | HLA-A*02:01 | 601           | 0.025        | -0.756        | 0.23087         | 0.05805       | 50            | 0.025      | -0.756     | 0.23087             | 0.05805        | 50       | TRUE | TRUE      | TRUE           | TRUE                | TRUE          | TRUE    |      |
| 2     | LVNCTDSTA   | 602   | 610 | 9              | HLA-A*02:01 | 602           | 0.062        | -0.661        | 0.20261         | 0.20154       | 16            | 0.062      | -0.661     | 0.20261             | 0.20154        | 16       | TRUE | TRUE      | TRUE           | TRUE                | TRUE          | TRUE    |      |
| 3     | 1CTDSTAHN   | 603   | 610 | 8              | HLA-A*02:01 | 603           | 0.092        | -0.633        | 0.08768         | 0.0359        | 50            | 0.092      | -0.633     | 0.08768             | 0.0359         | 50       | TRUE | TRUE      | TRUE           | TRUE                | TRUE          | TRUE    |      |
| 4     | 1DVSIAHAH   | 604   | 612 | 9              | HLA-A*02:01 | 604           | 0.018        | -0.793        | 0.13594         | 0.02876       | 50            | 0.018      | -0.793     | 0.13594             | 0.02876        | 50       | TRUE | TRUE      | TRUE           | TRUE                | TRUE          | TRUE    |      |
| 5     | 1DVSIAHAH   | 605   | 613 | 9              | HLA-A*02:01 | 605           | 0.013        | -1.987        | 0.11565         | -0.01065      | 50            | 0.013      | -1.987     | 0.11565             | -0.01065       | 50       | TRUE | TRUE      | TRUE           | TRUE                | TRUE          | TRUE    |      |
| 6     | 1VSTAHADQL  | 606   | 614 | 9              | HLA-A*02:01 | 606           | 0.017        | -0.718        | 0.04742         | 0.01322       | 50            | 0.017      | -0.718     | 0.04742             | 0.01322        | 50       | TRUE | TRUE      | TRUE           | TRUE                | TRUE          | TRUE    |      |
| 7     | 1STAHADQL   | 607   | 615 | 9              | HLA-A*02:01 | 607           | 0.12         | 1.05          | 0.27274         | 0.20762       | 32            | 0.12       | 1.05       | 0.27274             | 0.20762        | 32       | TRUE | TRUE      | TRUE           | TRUE                | TRUE          | TRUE    |      |
| 8     | 1TAHAADQL   | 608   | 616 | 9              | HLA-A*02:01 | 608           | 0.028        | -0.551        | 0.02386         | 0.01959       | 50            | 0.028      | -0.551     | 0.02386             | 0.01959        | 50       | TRUE | TRUE      | TRUE           | TRUE                | TRUE          | TRUE    |      |
| 9     | 1AHADQLTP   | 609   | 617 | 9              | HLA-A*02:01 | 609           | 0.026        | 0.417         | 0.04462         | 0.04464       | 50            | 0.026      | 0.417      | 0.04462             | 0.04464        | 50       | TRUE | TRUE      | TRUE           | TRUE                | TRUE          | TRUE    |      |
| 10    | 1HAQDLTP    | 610   | 618 | 9              | HLA-A*02:01 | 610           | 0.049        | 0.1486        | 0.01409         | 0.01409       | 50            | 0.049      | 0.1486     | 0.01409             | 0.01409        | 50       | TRUE | TRUE      | TRUE           | TRUE                | TRUE          | TRUE    |      |
| 11    | 1HADQLTPAW  | 611   | 619 | 9              | HLA-A*02:01 | 611           | 0.05         | 0.679         | 0.90017         | 0.26951       | 32            | 0.05       | 0.679      | 0.90017             | 0.26951        | 32       | TRUE | TRUE      | TRUE           | TRUE                | TRUE          | TRUE    |      |
| 12    | 1ADQLTPAWIR | 612   | 620 | 9              | HLA-A*02:01 | 612           | 0.013        | 1.266         | 0.06171         | 0.05854       | 50            | 0.013      | 1.266      | 0.06171             | 0.05854        | 50       | TRUE | TRUE      | TRUE           | TRUE                | TRUE          | TRUE    |      |
| 13    | 1DQLTPAWIR  | 613   | 621 | 9              | HLA-A*02:01 | 613           | 0.174        | 0.466         | 0.55595         | 0.31074       | 16            | 0.174      | 0.466      | 0.55595             | 0.31074        | 16       | TRUE | TRUE      | TRUE           | TRUE                | TRUE          | TRUE    |      |
| 14    | 1QLTPAWIRY  | 614   | 622 | 9              | HLA-A*02:01 | 614           | 0.048        | 1.782         | 0.8899          | 0.31778       | 16            | 0.048      | 1.782      | 0.8899              | 0.31778        | 16       | TRUE | TRUE      | TRUE           | TRUE                | TRUE          | TRUE    |      |
| 15    | 1TPAWIRYS   | 615   | 623 | 9              | HLA-A*02:01 | 615           | 0.08         | -2.327        | 0.02743         | 0.028         | 50            | 0.08       | -2.327     | 0.02743             | 0.028          | 50       | TRUE | TRUE      | TRUE           | TRUE                | TRUE          | TRUE    |      |
| 16    | 1TPAWIRYS   | 616   | 624 | 9              | HLA-A*02:01 | 616           | 0.053        | -0.966        | 0.16119         | 0.06512       | 50            | 0.053      | -0.966     | 0.16119             | 0.06512        | 50       | TRUE | TRUE      | TRUE           | TRUE                | TRUE          | TRUE    |      |
| 17    | 1PAWIRYS    | 617   | 625 | 9              | HLA-A*02:01 | 617           | 0.014        | 1.641         | 0.29204         | 0.03868       | 50            | 0.014      | 1.641      | 0.29204             | 0.03868        | 50       | TRUE | TRUE      | TRUE           | TRUE                | TRUE          | TRUE    |      |
| 18    | 1AWIRYSTGN  | 618   | 626 | 9              | HLA-A*02:01 | 618           | 0.012        | 1.021         | 0.02939         | 0.00899       | 50            | 0.012      | 1.021      | 0.02939             | 0.00899        | 50       | TRUE | TRUE      | TRUE           | TRUE                | TRUE          | TRUE    |      |
| 19    | 1WRIRYSTGN  | 619   | 627 | 9              | HLA-A*02:01 | 619           | 0.006        | -0.913        | 0.02595         | -0.01099      | 50            | 0.006      | -0.913     | 0.02595             | -0.01099       | 50       | TRUE | TRUE      | TRUE           | TRUE                | TRUE          | TRUE    |      |
| 20    | 1RIRYSTGNV  | 620   | 628 | 9              | HLA-A*02:01 | 620           | 0.378        | 0.818         | 0.76165         | 0.56982       | 4             | 0.378      | 0.818      | 0.76165             | 0.56982        | 4        | TRUE | TRUE      | TRUE           | TRUE                | TRUE          | TRUE    |      |
| 21    | 1YRSTGNV    | 621   | 629 | 9              | HLA-A*02:01 | 621           | 0.028        | 2.95          | 0.96772         | 0.31949       | 16            | 0.028      | 2.95       | 0.96772             | 0.31949        | 16       | TRUE | TRUE      | TRUE           | TRUE                | TRUE          | TRUE    |      |
| 22    | 1YSTGNV     | 622   | 630 | 9              | HLA-A*02:01 | 622           | 0.027        | -0.113        | 0.00124         | 0.00148       | 50            | 0.027      | -0.113     | 0.00124             | 0.00148        | 50       | TRUE | TRUE      | TRUE           | TRUE                | TRUE          | TRUE    |      |
| 23    | 1STGNVFTQ   | 623   | 631 | 9              | HLA-A*02:01 | 623           | 0.087        | -0.889        | 0.27178         | 0.12592       | 50            | 0.087      | -0.889     | 0.27178             | 0.12592        | 50       | TRUE | TRUE      | TRUE           | TRUE                | TRUE          | TRUE    |      |
| 24    | 1TGNVFTQ    | 624   | 632 | 9              | HLA-A*02:01 | 624           | 0.012        | -0.433        | 0.53096         | 0.12064       | 50            | 0.012      | -0.433     | 0.53096             | 0.12064        | 50       | TRUE | TRUE      | TRUE           | TRUE                | TRUE          | TRUE    |      |
| 25    | 1GNVFTQ     | 625   | 633 | 9              | HLA-A*02:01 | 625           | 0.03         | 0.451         | 0.29996         | 0.07363       | 50            | 0.03       | 0.451      | 0.29996             | 0.07363        | 50       | TRUE | TRUE      | TRUE           | TRUE                | TRUE          | TRUE    |      |
| 26    | 1NVFTQAG    | 626   | 634 | 9              | HLA-A*02:01 | 626           | 0.063        | 0.463         | 0.04177         | 0.03918       | 50            | 0.063      | 0.463      | 0.04177             | 0.03918        | 50       | TRUE | TRUE      | TRUE           | TRUE                | TRUE          | TRUE    |      |
| 27    | 1NVFTQAGC   | 627   | 635 | 9              | HLA-A*02:01 | 627           | 0.064        | 0.443         | 0.03004         | 0.08183       | 50            | 0.064      | 0.443      | 0.03004             | 0.08183        | 50       | TRUE | TRUE      | TRUE           | TRUE                | TRUE          | TRUE    |      |
| 28    | 1VFTQAGC    | 628   | 636 | 9              | HLA-A*02:01 | 628           | 0.048        | 1.293         | 0.28491         | 0.14443       | 50            | 0.048      | 1.293      | 0.28491             | 0.14443        | 50       | TRUE | TRUE      | TRUE           | TRUE                | TRUE          | TRUE    |      |
| 29    | 1FTQAGC     | 629   | 637 | 9              | HLA-A*02:01 | 629           | 0.306        | 0.526         | 0.3456          | 0.41693       | 7             | 0.306      | 0.526      | 0.3456              | 0.41693        | 7        | TRUE | TRUE      | TRUE           | TRUE                | TRUE          | TRUE    |      |
| 30    | 1TQAGC      | 630   | 638 | 9              | HLA-A*02:01 | 630           | 0.012        | 0.45235       | 0.00924         | 0.00924       | 50            | 0.012      | 0.45235    | 0.00924             | 0.00924        | 50       | TRUE | TRUE      | TRUE           | TRUE                | TRUE          | TRUE    |      |
| 31    | 1TQAGC      | 631   | 639 | 9              | HLA-A*02:01 | 631           | 0.488        | -0.513        | 0.07488         | 0.48202       | 5             | 0.488      | -0.513     | 0.07488             | 0.48202        | 5        | TRUE | TRUE      | TRUE           | TRUE                | TRUE          | TRUE    |      |
| 32    | 1QAGC       | 632   | 640 | 9              | HLA-A*02:01 | 632           | 0.013        | -1.653        | 0.0243          | -0.02286      | 50            | 0.013      | -1.653     | 0.0243              | -0.02286       | 50       | TRUE | TRUE      | TRUE           | TRUE                | TRUE          | TRUE    |      |
| 33    | 1AGC        | 633   | 641 | 9              | HLA-A*02:01 | 633           | 0.015        | -0.698        | 0.03634         | 0.00573       | 50            | 0.015      | -0.698     | 0.03634             | 0.00573        | 50       | TRUE | TRUE      | TRUE           | TRUE                | TRUE          | TRUE    |      |
| 34    | 1GAG        | 634   | 642 | 9              | HLA-A*02:01 | 634           | 0.018        | 0.61448       | 0.21326         | 0.01369       | 50            | 0.018      | 0.61448    | 0.21326             | 0.01369        | 50       | TRUE | TRUE      | TRUE           | TRUE                | TRUE          | TRUE    |      |
| 35    | 1CLGAG      | 635   | 643 | 9              | HLA-A*02:01 | 635           | 0.069        | -1.798        | 0.05499         | 0.03642       | 50            | 0.069      | -1.798     | 0.05499             | 0.03642        | 50       | TRUE | TRUE      | TRUE           | TRUE                | TRUE          | TRUE    |      |
| 36    | 1LGAHVDT    | 636   | 644 | 9              | HLA-A*02:01 | 636           | 0.066        | -0.743        | 0.05504         | 0.05981       | 50            | 0.066      | -0.743     | 0.05504             | 0.05981        | 50       | TRUE | TRUE      | TRUE           | TRUE                | TRUE          | TRUE    |      |
| 37    | 1GAHVDT     | 637   | 645 | 9              | HLA-A*02:01 | 637           | 0.025        | -2.424        | 0.05311         | -0.02365      | 50            | 0.025      | -2.424     | 0.05311             | -0.02365       | 50       | TRUE | TRUE      | TRUE           | TRUE                | TRUE          | TRUE    |      |
| 38    | 1GAHVDTSY   | 638   | 646 | 9              | HLA-A*02:01 | 638           | 0.017        | 0.74131       | 0.31276         | 0.1276        | 16            | 0.017      | 0.74131    | 0.31276             | 0.1276         | 16       | TRUE | TRUE      | TRUE           | TRUE                | TRUE          | TRUE    |      |
| 39    | 1AEHVDTSY   | 639   | 647 | 9              | HLA-A*02:01 | 639           | 0.006        | -1.557        | 0.04936         | -0.02182      | 50            | 0.006      | -1.557     | 0.04936             | -0.02182       | 50       | TRUE | TRUE      | TRUE           | TRUE                | TRUE          | TRUE    |      |
| 40    | 1EHVDTSYEC  | 640   | 648 | 9              | HLA-A*02:01 | 640           | 0.017        | 0.05          | 0.20689         | 0.0648        | 50            | 0.017      | 0.05       | 0.20689             | 0.0648         | 50       | TRUE | TRUE      | TRUE           | TRUE                | TRUE          | TRUE    |      |
| 41    | 1HVDTSYEC   | 641   | 649 | 9              | HLA-A*02:01 | 641           | 0.011        | -2.111        | 0.0233          | -0.03653      | 50            | 0.011      | -2.111     | 0.0233              | -0.03653       | 50       | TRUE | TRUE      | TRUE           | TRUE                | TRUE          | TRUE    |      |
| 42    | 1VDTSYEC    | 642   | 650 | 9              | HLA-A*02:01 | 642           | 0.12         | 0.75236       | 0.02368         | 0.02368       | 50            | 0.12       | 0.75236    | 0.02368             | 0.02368        | 50       | TRUE | TRUE      | TRUE           | TRUE                | TRUE          | TRUE    |      |
| 43    | 1DTSYEC     | 643   | 651 | 9              | HLA-A*02:01 | 643           | 0.005        | -0.19         | 0.0229          | 0.0054        | 50            | 0.005      | -0.19      | 0.0229              | 0.0054         | 50       | TRUE | TRUE      | TRUE           | TRUE                | TRUE          | TRUE    |      |
| 44    | 1TSYEC      | 644   | 652 | 9              | HLA-A*02:01 | 644           | 0.248        | 0.602         | 0.21986         | 0.31252       | 16            | 0.248      | 0.602      | 0.21986             | 0.31252        | 16       | TRUE | TRUE      | TRUE           | TRUE                | TRUE          | TRUE    |      |
| 45    | 1SYEC       | 645   | 653 | 9              | HLA-A*02:01 | 645           | 0.012        | -1.212        | 0.0242          | -0.011        | 50            | 0.012      | -1.212     | 0.0242              | -0.011         | 50       | TRUE | TRUE      | TRUE           | TRUE                | TRUE          | TRUE    |      |
| 46    | 1YEC        | 646   | 654 | 9              | HLA-A*02:01 | 646           | 0.086        | -0.5496       | 0.13762         | 0.01762       | 50            | 0.086      | -0.5496    | 0.13762             | 0.01762        | 50       | TRUE | TRUE      | TRUE           | TRUE                | TRUE          | TRUE    |      |
| 47    | 1EC         | 647   | 655 | 9              | HLA-A*02:01 | 647           | 0.01         | -1.807        | 0.04092         | -0.02597      | 50            | 0.01       | -1.807     | 0.04092             | -0.02597       | 50       | TRUE | TRUE      | TRUE           | TRUE                | TRUE          | TRUE    |      |
| 48    | 1CDPIGAGI   | 648   | 656 | 9              | HLA-A*02:01 | 648           | 0.055        | 0.088         | 0.58093         | 0.18791       | 50            | 0.055      | 0.088      | 0.58093             | 0.18791        | 50       | TRUE | TRUE      | TRUE           | TRUE                | TRUE          | TRUE    |      |
| 49    | 1DPIGAGI    | 649   | 657 | 9              | HLA-A*02:01 | 649           | 0.019        | -0.195        | 0.02681         | 0.02016       | 50            | 0.019      | -0.195     | 0.02681             | 0.02016        | 50       | TRUE | TRUE      | TRUE           | TRUE                | TRUE          | TRUE    |      |
| 50    | 1PIGAGI     | 650   | 658 | 9              | HLA-A*02:01 | 650           | 0.017        | 0.61          | 0.34207         | 0.017         | 50            | 0.017      | 0.61       | 0.34207             | 0.017          | 50       | TRUE | TRUE      | TRUE           | TRUE                | TRUE          | TRUE    |      |
| 51    | 1PIGAGI     | 651   | 659 | 9              | HLA-A*02:01 | 651           | 0.024        | -2.751        | 0.02588         | -0.03895      | 50            | 0.024      | -2.751     | 0.02588             | -0.03895       | 50       | TRUE | TRUE      | TRUE           | TRUE                | TRUE          | TRUE    |      |
| 52    | 1IGAGI      | 652   | 660 | 9              | HLA-A*02:01 | 652           | 0.061        | 2.553         | 0.94476         | 0.3174        | 1.60E+01      | 0.061      | 2.553      | 0.94476             | 0.3174         | 16       | TRUE | TRUE      | TRUE           | TRUE                | TRUE          | TRUE    |      |
| 53    | 1GAGI       | 653   | 661 | 9              | HLA-A*02:01 | 653           | 0.024        | -0.816        | 0.04006         | 0.01261       | 50            | 0.024      | -0.816     | 0.04006             | 0.01261        | 50       | TRUE | TRUE      | TRUE           | TRUE                | TRUE          | TRUE    |      |
| 54    | 1GAGI       | 654   | 662 | 9              | HLA-A*02:01 | 654           | 0.041        | -0.739        | 0.01791         | 0.01791       | 50            | 0.041      | -0.739     | 0.01791             | 0.01791        | 50       | TRUE | TRUE      | TRUE           | TRUE                | TRUE          | TRUE    |      |
| 55    | 1GAGI       | 655   | 663 | 9              | HLA-A*02:01 | 655           | 0.465        | 0.427         | 0.73394         | 0.64081       | 3             | 0.465      | 0.427      | 0.73394             | 0.64081        | 3        | TRUE | TRUE      | TRUE           | TRUE                | TRUE          | TRUE    |      |
| 56    | 1GAGI       | 656   | 664 | 9              | HLA-A*02:01 | 656           | 0.019        | -2.215        | 0.05444         | -0.02413      | 50            | 0.019      | -2.215     | 0.05444             | -0.02413       | 50       | TRUE | TRUE      | TRUE           | TRUE                | TRUE          | TRUE    |      |
| 57    | 1GAGI       | 657   | 665 | 9              | HLA-A*02:01 | 657           | 0.188        | 0.971         | 0.94579         | 0.46508       | 8             | 0.188      | 0.971      | 0.94579             | 0.46508        | 8        | TRUE | TRUE      | TRUE           | TRUE                | TRUE          | TRUE    |      |
| 58    | 1GAGI       | 658   | 666 | 9              | HLA-A*02:01 | 658           | 0.019        | 1.319         | 0.0232          | 0.04723       | 6             | 0.019      | 1.319      | 0.0232              | 0.04723        | 6        | TRUE | TRUE      | TRUE           | TRUE                | TRUE          | TRUE    |      |
| 59    | 1GAGI       | 659   | 667 | 9              | HLA-A*02:01 | 659           | 0.033        | 1.986         | 0.97263         | 0.30149       | 16            | 0.033      | 1.986      | 0.97263             | 0.30149        | 16       | TRUE | TRUE      | TRUE           | TRUE                | TRUE          | TRUE    |      |
| 60    | 1GAGI       | 660   | 668 | 9              | HLA-A*02:01 | 660           | 0.019        | -2.24         | 0.0298          | -0.03029      | 50            | 0.019      | -2.24      | 0.0298              | -0.03029       | 50       | TRUE | TRUE      | TRUE           | TRUE                |               |         |      |







| seq # | peptide    | start | end  | peptide length | allele      | peptide index | NetCTLpan MH | NetCTLpan tap | NetCTLpan cle | NetCTLpan con | NetCTLpan per | legacy mhc_pre | legacy tap_pre | legacy cleavage | legacy combine | legacy % rank | equal mhc_pre | equal tap_pre | equal cleavage | equal combine | equal % rank |
|-------|------------|-------|------|----------------|-------------|---------------|--------------|---------------|---------------|---------------|---------------|----------------|----------------|-----------------|----------------|---------------|---------------|---------------|----------------|---------------|--------------|
| 1     | GFAGLAI    | 1201  | 1209 | 9              | HLA-A*02:01 | 1201          | 0.321        | 0.64          | 9.05E-02      | 3.57E-01      | 10            | 0.321          | 0.64           | 0.09046         | 0.35735        | 10            | TRUE          | TRUE          | TRUE           | TRUE          | TRUE         |
| 1     | FAGLIAIV   | 1202  | 1210 | 9              | HLA-A*02:01 | 1202          | 0.845        | 0.335         | 2.14E-01      | 9.02E-01      | 0.8           | 0.845          | 0.335          | 0.21437         | 0.90161        | 0.8           | TRUE          | TRUE          | TRUE           | TRUE          | TRUE         |
| 1     | IAGLIAVM   | 1203  | 1211 | 9              | HLA-A*02:01 | 1203          | 0.116        | 0.112         | 1.25E-01      | 3.47E-01      | 50            | 0.116          | 0.112          | 0.12527         | 0.14699        | 50            | TRUE          | TRUE          | TRUE           | TRUE          | TRUE         |
| 1     | IAGLIAVMV  | 1204  | 1212 | 9              | HLA-A*02:01 | 1204          | 0.208        | 0.219         | 4.72E-01      | 3.20E-01      | 16            | 0.208          | 0.219          | 0.47214         | 0.31971        | 16            | TRUE          | TRUE          | TRUE           | TRUE          | TRUE         |
| 1     | GLIAIVMT   | 1205  | 1213 | 9              | HLA-A*02:01 | 1205          | 0.453        | -0.642        | 7.09E-02      | 4.53E-01      | 6             | 0.453          | -0.642         | 0.07045         | 0.4528         | 6             | TRUE          | TRUE          | TRUE           | TRUE          | TRUE         |
| 1     | IIAIVMTI   | 1206  | 1214 | 9              | HLA-A*02:01 | 1206          | 0.444        | 0.654         | 7.71E-01      | 6.34E-01      | 3             | 0.444          | 0.654          | 0.77209         | 0.63407        | 3             | TRUE          | TRUE          | TRUE           | TRUE          | TRUE         |
| 1     | IAIVMTIL   | 1207  | 1215 | 9              | HLA-A*02:01 | 1207          | 0.181        | 1.147         | 8.66E-01      | 4.05E-01      | 8             | 0.181          | 1.147          | 0.8662          | 0.40457        | 8             | TRUE          | TRUE          | TRUE           | TRUE          | TRUE         |
| 1     | IAIVMTILL  | 1208  | 1216 | 9              | HLA-A*02:01 | 1208          | 0.365        | 1.314         | 9.34E-01      | 6.08E-01      | 3             | 0.365          | 1.314          | 0.93432         | 0.60807        | 3             | TRUE          | TRUE          | TRUE           | TRUE          | TRUE         |
| 1     | IIVMTILL   | 1209  | 1217 | 9              | HLA-A*02:01 | 1209          | 0.221        | 0.195         | 4.55E-02      | 2.41E-01      | 32            | 0.221          | 0.195          | 0.04549         | 0.24111        | 32            | TRUE          | TRUE          | TRUE           | TRUE          | TRUE         |
| 1     | IIVMTILLCC | 1210  | 1218 | 9              | HLA-A*02:01 | 1210          | 0.281        | 0.285         | 4.61E-02      | 2.98E-01      | 16            | 0.281          | 0.285          | 0.04609         | 0.29849        | 16            | TRUE          | TRUE          | TRUE           | TRUE          | TRUE         |
| 1     | IVMTILLCCM | 1211  | 1219 | 9              | HLA-A*02:01 | 1211          | 0.195        | 0.501         | 4.08E-01      | 3.99E-01      | 16            | 0.195          | 0.501          | 0.40793         | 0.29931        | 16            | TRUE          | TRUE          | TRUE           | TRUE          | TRUE         |
| 1     | VTILLCCMT  | 1212  | 1220 | 9              | HLA-A*02:01 | 1212          | 0.106        | -0.56         | 9.80E-02      | 1.14E-01      | 50            | 0.106          | -0.56          | 0.09801         | 0.11405        | 50            | TRUE          | TRUE          | TRUE           | TRUE          | TRUE         |
| 1     | TILLCCMTS  | 1213  | 1221 | 9              | HLA-A*02:01 | 1213          | 0.137        | -2.073        | 1.57E-01      | 1.20E-01      | 50            | 0.137          | -2.073         | 0.15655         | 0.1204         | 50            | TRUE          | TRUE          | TRUE           | TRUE          | TRUE         |
| 1     | ILCCMTSC   | 1214  | 1222 | 9              | HLA-A*02:01 | 1214          | 0.43         | 0.085         | 7.94E-02      | 4.50E-01      | 6             | 0.43           | 0.085          | 0.07935         | 0.44998        | 6             | TRUE          | TRUE          | TRUE           | TRUE          | TRUE         |
| 1     | LLCCMTSCC  | 1215  | 1223 | 9              | HLA-A*02:01 | 1215          | 0.171        | 0.056         | 3.39E-02      | 3.80E-01      | 50            | 0.171          | 0.056          | 0.03391         | 0.18003        | 50            | TRUE          | TRUE          | TRUE           | TRUE          | TRUE         |
| 1     | LCOMTSCS   | 1216  | 1224 | 9              | HLA-A*02:01 | 1216          | 0.008        | -2.164        | 2.72E-02      | -4.00E-02     | 50            | 0.008          | -2.164         | 0.02715         | -0.03999       | 50            | TRUE          | TRUE          | TRUE           | TRUE          | TRUE         |
| 1     | COMTSCSCS  | 1217  | 1225 | 9              | HLA-A*02:01 | 1217          | 0.043        | 0.107         | 2.55E-02      | 3.14E-02      | 50            | 0.043          | 0.107          | 0.02551         | 0.05141        | 50            | TRUE          | TRUE          | TRUE           | TRUE          | TRUE         |
| 1     | OMTSCSCL   | 1218  | 1226 | 9              | HLA-A*02:01 | 1218          | 0.359        | 0.992         | 8.30E-01      | 5.71E-01      | 4             | 0.359          | 0.992          | 0.82976         | 0.5705         | 4             | TRUE          | TRUE          | TRUE           | TRUE          | TRUE         |
| 1     | MTSCSCLK   | 1219  | 1227 | 9              | HLA-A*02:01 | 1219          | 0.058        | 0.479         | 7.09E-01      | 2.30E-01      | 32            | 0.058          | 0.479          | 0.70915         | 0.22953        | 32            | TRUE          | TRUE          | TRUE           | TRUE          | TRUE         |
| 1     | TSCSCLKG   | 1220  | 1228 | 9              | HLA-A*02:01 | 1220          | 0.012        | -1.331        | 5.90E-02      | -7.99E-03     | 50            | 0.012          | -1.331         | 0.05903         | -0.00799       | 50            | TRUE          | TRUE          | TRUE           | TRUE          | TRUE         |
| 1     | SCSCLKMG   | 1221  | 1229 | 9              | HLA-A*02:01 | 1221          | 0.038        | -0.443        | 3.91E-02      | 3.57E-02      | 50            | 0.038          | -0.443         | 0.0391          | 0.03572        | 50            | TRUE          | TRUE          | TRUE           | TRUE          | TRUE         |
| 1     | CSCLKGAC   | 1222  | 1230 | 9              | HLA-A*02:01 | 1222          | 0.015        | 0.044         | 0.03338       | 0.02136       | 50            | 0.015          | 0.044          | 0.03338         | 0.02136        | 50            | TRUE          | TRUE          | TRUE           | TRUE          | TRUE         |
| 1     | CSLKGAC    | 1223  | 1231 | 9              | HLA-A*02:01 | 1223          | 0.013        | -2.244        | 0.02571       | -0.03732      | 50            | 0.013          | -2.244         | 0.02571         | -0.03732       | 50            | TRUE          | TRUE          | TRUE           | TRUE          | TRUE         |
| 1     | SLKLGAC    | 1224  | 1232 | 9              | HLA-A*02:01 | 1224          | 0.044        | 0.099         | 0.03277       | 0.05385       | 50            | 0.044          | 0.099          | 0.03277         | 0.05385        | 50            | TRUE          | TRUE          | TRUE           | TRUE          | TRUE         |
| 1     | CLKGACSG   | 1225  | 1233 | 9              | HLA-A*02:01 | 1225          | 0.03         | -1.365        | 0.11899       | 0.06765       | 50            | 0.03           | -1.365         | 0.11899         | 0.06765        | 50            | TRUE          | TRUE          | TRUE           | TRUE          | TRUE         |
| 1     | KGACSGS    | 1226  | 1234 | 9              | HLA-A*02:01 | 1226          | 0.01         | -2.362        | 0.03417       | -0.04132      | 50            | 0.01           | -2.362         | 0.03417         | -0.04132       | 50            | TRUE          | TRUE          | TRUE           | TRUE          | TRUE         |
| 1     | KGACSGSC   | 1227  | 1235 | 9              | HLA-A*02:01 | 1227          | 0.024        | -0.08         | 0.0343        | 0.02972       | 50            | 0.024          | -0.08          | 0.0343          | 0.02972        | 50            | TRUE          | TRUE          | TRUE           | TRUE          | TRUE         |
| 1     | GACSGSCC   | 1228  | 1236 | 9              | HLA-A*02:01 | 1228          | 0.02         | -0.002        | 0.02893       | 0.02646       | 50            | 0.02           | -0.002         | 0.02893         | 0.02646        | 50            | TRUE          | TRUE          | TRUE           | TRUE          | TRUE         |
| 1     | ACSGSGSC   | 1229  | 1237 | 9              | HLA-A*02:01 | 1229          | 0.008        | 0.595         | 0.80577       | 0.20417       | 32            | 0.008          | 0.595          | 0.80577         | 0.20417        | 32            | TRUE          | TRUE          | TRUE           | TRUE          | TRUE         |
| 1     | SGSGSCPF   | 1230  | 1238 | 9              | HLA-A*02:01 | 1230          | 0.038        | 2.697         | 0.92157       | 0.30278       | 16            | 0.038          | 2.697          | 0.92157         | 0.30278        | 16            | TRUE          | TRUE          | TRUE           | TRUE          | TRUE         |
| 1     | SGSGSCXFD  | 1231  | 1239 | 9              | HLA-A*02:01 | 1231          | 0.005        | -1.912        | 0.02312       | -0.0376       | 50            | 0.005          | -1.912         | 0.02312         | -0.0376        | 50            | TRUE          | TRUE          | TRUE           | TRUE          | TRUE         |
| 1     | CGSCXCFD   | 1232  | 1240 | 9              | HLA-A*02:01 | 1232          | 0.006        | -1.823        | 0.02217       | -0.03459      | 50            | 0.006          | -1.823         | 0.02217         | -0.03459       | 50            | TRUE          | TRUE          | TRUE           | TRUE          | TRUE         |
| 1     | GSCXCFD    | 1233  | 1241 | 9              | HLA-A*02:01 | 1233          | 0.008        | -1.952        | 0.0259        | -0.03497      | 50            | 0.008          | -1.952         | 0.0259          | -0.03497       | 50            | TRUE          | TRUE          | TRUE           | TRUE          | TRUE         |
| 1     | SCXCFD     | 1234  | 1242 | 9              | HLA-A*02:01 | 1234          | 0.004        | -1.763        | 0.02431       | -0.03461      | 50            | 0.004          | -1.763         | 0.02431         | -0.03461       | 50            | TRUE          | TRUE          | TRUE           | TRUE          | TRUE         |
| 1     | CKXCFD     | 1235  | 1243 | 9              | HLA-A*02:01 | 1235          | 0.004        | -2.214        | 0.02244       | -0.0463       | 50            | 0.004          | -2.214         | 0.02244         | -0.0463        | 50            | TRUE          | TRUE          | TRUE           | TRUE          | TRUE         |
| 1     | CKXCFDSE   | 1236  | 1244 | 9              | HLA-A*02:01 | 1236          | 0.004        | -1.452        | 0.02301       | -0.02712      | 50            | 0.004          | -1.452         | 0.02301         | -0.02712       | 50            | TRUE          | TRUE          | TRUE           | TRUE          | TRUE         |
| 1     | FXDSEPF    | 1237  | 1245 | 9              | HLA-A*02:01 | 1237          | 0.015        | 0.196         | 0.03675       | 0.02817       | 50            | 0.015          | 0.196          | 0.03675         | 0.02817        | 50            | TRUE          | TRUE          | TRUE           | TRUE          | TRUE         |
| 1     | FXDSEPV    | 1238  | 1246 | 9              | HLA-A*02:01 | 1238          | 0.07         | -0.111        | 0.27464       | 0.11852       | 50            | 0.07           | -0.111         | 0.27464         | 0.11852        | 50            | TRUE          | TRUE          | TRUE           | TRUE          | TRUE         |
| 1     | DEDSSEPV   | 1239  | 1247 | 9              | HLA-A*02:01 | 1239          | 0.019        | 0.222         | 0.95055       | 0.23842       | 32            | 0.019          | 0.222          | 0.95055         | 0.23842        | 32            | TRUE          | TRUE          | TRUE           | TRUE          | TRUE         |
| 1     | EDDSSEPV   | 1240  | 1248 | 9              | HLA-A*02:01 | 1240          | 0.008        | -0.362        | 0.31025       | 0.06876       | 50            | 0.008          | -0.362         | 0.31025         | 0.06876        | 50            | TRUE          | TRUE          | TRUE           | TRUE          | TRUE         |
| 1     | DSEPVKGV   | 1241  | 1249 | 9              | HLA-A*02:01 | 1241          | 0.005        | -2.19         | 0.15266       | -0.0154       | 50            | 0.005          | -2.19          | 0.15266         | -0.0154        | 50            | TRUE          | TRUE          | TRUE           | TRUE          | TRUE         |
| 1     | DSEPVKGV   | 1242  | 1250 | 9              | HLA-A*02:01 | 1242          | 0.027        | -0.244        | 0.62365       | 0.16122       | 50            | 0.027          | -0.244         | 0.62365         | 0.16122        | 50            | TRUE          | TRUE          | TRUE           | TRUE          | TRUE         |
| 1     | SEPVKGVK   | 1243  | 1251 | 9              | HLA-A*02:01 | 1243          | 0.008        | 0.228         | 0.35753       | 0.09414       | 50            | 0.008          | 0.228          | 0.35753         | 0.09414        | 50            | TRUE          | TRUE          | TRUE           | TRUE          | TRUE         |
| 1     | EPVKGVKL   | 1244  | 1252 | 9              | HLA-A*02:01 | 1244          | 0.021        | 0.578         | 0.97679       | 0.25523       | 32            | 0.021          | 0.578          | 0.97679         | 0.25523        | 32            | TRUE          | TRUE          | TRUE           | TRUE          | TRUE         |
| 1     | PVKGVKLH   | 1245  | 1253 | 9              | HLA-A*02:01 | 1245          | 0.014        | -1.026        | 0.38649       | 0.07531       | 50            | 0.014          | -1.026         | 0.38649         | 0.07531        | 50            | TRUE          | TRUE          | TRUE           | TRUE          | TRUE         |
| 1     | VKGVKLH    | 1246  | 1254 | 9              | HLA-A*02:01 | 1246          | 0.056        | 2.859         | 0.97833       | 0.3476        | 10            | 0.056          | 2.859          | 0.97833         | 0.3476         | 10            | TRUE          | TRUE          | TRUE           | TRUE          | TRUE         |
| 1     | LKGVKHYT   | 1247  | 1255 | 9              | HLA-A*02:01 | 1247          | 0.02         | -0.768        | 0.11875       | 0.02752       | 50            | 0.02           | -0.768         | 0.11875         | 0.02752        | 50            | TRUE          | TRUE          | TRUE           | TRUE          | TRUE         |

| Cluster | Sub-Cluster | Peptide Number | Alignment      | Position | Input seq id | Peptide      | Cluster Consensus | Legacy Cluster | Legacy Peptide | Legacy Alignment | Legacy Position | Legacy Description | Legacy Peptide | equal Cluster | equal Peptide | equal Alignment | equal Position | equal Description | equal Peptide |      |
|---------|-------------|----------------|----------------|----------|--------------|--------------|-------------------|----------------|----------------|------------------|-----------------|--------------------|----------------|---------------|---------------|-----------------|----------------|-------------------|---------------|------|
| 1.1     | Consensus   | 1              | TFQLMLVGRK     |          |              | TFQLMLVGRK   | TFQLMLVGRK        | 1.1            | Consensus      | TFQLMLVGRK       |                 |                    | TFQLMLVGRK     | 1.1           | Consensus     | TFQLMLVGRK      |                |                   | TFQLMLVGRK    |      |
| 1.1     | 1           | 1              | TFQLMLVGRK     |          | Rat Pep17    | TFQLMLVGRK   | TFQLMLVGRK        | 1.1            | 1              | 1                | 1               | TFQLMLVGRK         | 1              | Rat Pep17     | TFQLMLVGRK    | TRUE            | TRUE           | TRUE              | TRUE          |      |
| 1.1     | 2           | 2              | -----GLYRPE    |          | Rat Pep17    | GLYRPEPOLSS  | TFQLMLVGRK        | 1.1            | 2              | 2                | 2               | -----GLYRPE        | 2              | Rat Pep17     | GLYRPEPOLSS   | TRUE            | TRUE           | TRUE              | TRUE          |      |
| 1.1     | 3           | 3              | YGRIPYDLPPT    |          | Rat Pep17    | YGRIPYDLPPT  | TFQLMLVGRK        | 1.1            | 3              | 3                | 3               | YGRIPYDLPPT        | 3              | Rat Pep17     | YGRIPYDLPPT   | TRUE            | TRUE           | TRUE              | TRUE          |      |
| 1.1     | 4           | 4              | RTKLDSSDKKE    |          | Rat Pep9     | RTKLDSSDKKE  | TFQLMLVGRK        | 1.1            | 4              | 4                | 4               | RTKLDSSDKKE        | 4              | Rat Pep9      | RTKLDSSDKKE   | TRUE            | TRUE           | TRUE              | TRUE          |      |
| 2.1     | Consensus   | 1              | YDRYVMHMLNL    |          |              | YDRYVMHMLNL  | YDRYVMHMLNL       | 2.1            | Consensus      | YDRYVMHMLNL      |                 |                    | YDRYVMHMLNL    | 2.1           | Consensus     | YDRYVMHMLNL     |                |                   | YDRYVMHMLNL   |      |
| 2.1     | 1           | 1              | YDRYVMHMLNL    |          | Rat Pep19    | YDRYVMHMLNL  | YDRYVMHMLNL       | 2.1            | 1              | 1                | 1               | YDRYVMHMLNL        | 1              | Rat Pep19     | YDRYVMHMLNL   | TRUE            | TRUE           | TRUE              | TRUE          |      |
| 2.1     | 2           | 2              | AHLNKDGE       |          | Rat Pep19    | AHLNKDGE     | YDRYVMHMLNL       | 2.1            | 2              | 2                | 2               | AHLNKDGE           | 2              | Rat Pep19     | AHLNKDGE      | TRUE            | TRUE           | TRUE              | TRUE          |      |
| 2.1     | 3           | 3              | LNFKNGETQLM    |          | Rat Pep12    | LNFKNGETQLM  | YDRYVMHMLNL       | 2.1            | 3              | 3                | 3               | LNFKNGETQLM        | 3              | Rat Pep12     | LNFKNGETQLM   | TRUE            | TRUE           | TRUE              | TRUE          |      |
| 2.1     | 4           | 4              | -----NEKDE     |          | Rat Pep6     | NEKDEGTQLM   | YDRYVMHMLNL       | 2.1            | 4              | 4                | 4               | -----NEKDE         | 4              | Rat Pep6      | NEKDEGTQLM    | TRUE            | TRUE           | TRUE              | TRUE          |      |
| 3.1     | Consensus   | 1              | FXDHVHVLNSL    |          |              | FXDHVHVLNSL  | FXDHVHVLNSL       | 3.1            | Consensus      | FXDHVHVLNSL      |                 |                    | FXDHVHVLNSL    | 3.1           | Consensus     | FXDHVHVLNSL     |                |                   | FXDHVHVLNSL   |      |
| 3.1     | 1           | 1              | FXDHVHVLNSL    |          | Rat Pep6     | FXDHVHVLNSL  | FXDHVHVLNSL       | 3.1            | 1              | 1                | 1               | FXDHVHVLNSL        | 1              | Rat Pep6      | FXDHVHVLNSL   | TRUE            | TRUE           | TRUE              | TRUE          |      |
| 3.1     | 2           | 2              | FVEVHVLNSL     |          | 3            | 2            | FVEVHVLNSL        | FXDHVHVLNSL    | 3.1            | 2                | 2               | 2                  | FVEVHVLNSL     | 2             | Rat Pep2      | FVEVHVLNSL      | TRUE           | TRUE              | TRUE          | TRUE |
| 4.1     | Consensus   | 1              | EENGSMRVFVH    |          |              | EENGSMRVFVH  | EENGSMRVFVH       | 4.1            | Consensus      | EENGSMRVFVH      |                 |                    | EENGSMRVFVH    | 4.1           | Consensus     | EENGSMRVFVH     |                |                   | EENGSMRVFVH   |      |
| 4.1     | 1           | 1              | EENGSMRVFVH    |          | Rat Pep4     | EENGSMRVFVH  | EENGSMRVFVH       | 4.1            | 1              | 1                | 1               | EENGSMRVFVH        | 1              | Rat Pep4      | EENGSMRVFVH   | TRUE            | TRUE           | TRUE              | TRUE          |      |
| 4.1     | 2           | 2              | -----GSMRVFVH  |          | Rat Pep16    | GSMRVFVH     | EENGSMRVFVH       | 4.1            | 2              | 2                | 2               | -----GSMRVFVH      | 2              | Rat Pep16     | GSMRVFVH      | TRUE            | TRUE           | TRUE              | TRUE          |      |
| 5.1     | Consensus   | 1              | EAASSTGRNFM    |          |              | EAASSTGRNFM  | EAASSTGRNFM       | 5.1            | Consensus      | EAASSTGRNFM      |                 |                    | EAASSTGRNFM    | 5.1           | Consensus     | EAASSTGRNFM     |                |                   | EAASSTGRNFM   |      |
| 5.1     | 1           | 1              | EAASSTGRNFM    |          | 1            | 1            | EAASSTGRNFM       | EAASSTGRNFM    | 5.1            | 1                | 1               | 1                  | EAASSTGRNFM    | 1             | 1             | EAASSTGRNFM     | TRUE           | TRUE              | TRUE          | TRUE |
| 5.1     | 2           | 2              | -----NVEKNGEW  |          | 11           | 2            | NVEKNGEW          | EAASSTGRNFM    | 5.1            | 2                | 2               | 2                  | -----NVEKNGEW  | 11            | 2             | NVEKNGEW        | TRUE           | TRUE              | TRUE          | TRUE |
| 6.1     | Consensus   | 1              | GWFSVIOASX     |          |              | GWFSVIOASX   | GWFSVIOASX        | 6.1            | Consensus      | GWFSVIOASX       |                 |                    | GWFSVIOASX     | 6.1           | Consensus     | GWFSVIOASX      |                |                   | GWFSVIOASX    |      |
| 6.1     | 1           | 1              | GWFSVIOASX     |          | Rat Pep8     | GWFSVIOASX   | GWFSVIOASX        | 6.1            | 1              | 1                | 1               | GWFSVIOASX         | 1              | Rat Pep8      | GWFSVIOASX    | TRUE            | TRUE           | TRUE              | TRUE          |      |
| 6.1     | 2           | 2              | EWFSVILASDR    |          | 2            | 2            | EWFSVILASDR       | GWFSVIOASX     | 6.1            | 2                | 2               | 2                  | EWFSVILASDR    | 2             | Rat Pep4      | EWFSVILASDR     | TRUE           | TRUE              | TRUE          | TRUE |
| 7.1     | Consensus   | 1              | FVEYDGGNTFT    |          |              | FVEYDGGNTFT  | FVEYDGGNTFT       | 7.1            | Consensus      | FVEYDGGNTFT      |                 |                    | FVEYDGGNTFT    | 7.1           | Consensus     | FVEYDGGNTFT     |                |                   | FVEYDGGNTFT   |      |
| 7.1     | 1           | 1              | FVEYDGGNTFT    |          | Rat Pep7     | FVEYDGGNTFT  | FVEYDGGNTFT       | 7.1            | 1              | 1                | 1               | FVEYDGGNTFT        | 1              | Rat Pep7      | FVEYDGGNTFT   | TRUE            | TRUE           | TRUE              | TRUE          |      |
| 7.1     | 2           | 2              | -----DGFNTFTLK |          | 5            | 2            | DGFNTFTLK         | FVEYDGGNTFT    | 7.1            | 2                | 2               | 2                  | -----DGFNTFTLK | 5             | 2             | DGFNTFTLK       | TRUE           | TRUE              | TRUE          | TRUE |
| 8.1     | Consensus   | 1              | RNDMLDXTKTR    |          |              | RNDMLDXTKTR  | RNDMLDXTKTR       | 8.1            | Consensus      | RNDMLDXTKTR      |                 |                    | RNDMLDXTKTR    | 8.1           | Consensus     | RNDMLDXTKTR     |                |                   | RNDMLDXTKTR   |      |
| 8.1     | 1           | 1              | RNDMLDXTKTR    |          | Rat Pep14    | RNDMLDXTKTR  | RNDMLDXTKTR       | 8.1            | 1              | 1                | 1               | RNDMLDXTKTR        | 1              | Rat Pep14     | RNDMLDXTKTR   | TRUE            | TRUE           | TRUE              | TRUE          |      |
| 8.1     | 2           | 2              | ENIDLTNCKR     |          | 2            | 2            | ENIDLTNCKR        | RNDMLDXTKTR    | 8.1            | 2                | 2               | 2                  | ENIDLTNCKR     | 2             | 2             | ENIDLTNCKR      | TRUE           | TRUE              | TRUE          | TRUE |
| 9.1     | Consensus   | 1              | LEQHVHVLNSL    |          |              | LEQHVHVLNSL  | LEQHVHVLNSL       | 9.1            | Consensus      | LEQHVHVLNSL      |                 |                    | LEQHVHVLNSL    | 9.1           | Consensus     | LEQHVHVLNSL     |                |                   | LEQHVHVLNSL   |      |
| 9.1     | 1           | 1              | LEQHVHVLNSL    |          | Mus Pep1     | LEQHVHVLNSL  | LEQHVHVLNSL       | 9.1            | 1              | 1                | 1               | LEQHVHVLNSL        | 1              | Mus Pep1      | LEQHVHVLNSL   | TRUE            | TRUE           | TRUE              | TRUE          |      |
| 10.1    | Consensus   | 1              | LENSLVKVFQRE   |          |              | LENSLVKVFQRE | LENSLVKVFQRE      | 10.1           | Consensus      | LENSLVKVFQRE     |                 |                    | LENSLVKVFQRE   | 10.1          | Consensus     | LENSLVKVFQRE    |                |                   | LENSLVKVFQRE  |      |
| 11.1    | Consensus   | 1              | SRPFFQGVQLD    |          |              | SRPFFQGVQLD  | SRPFFQGVQLD       | 11.1           | Consensus      | SRPFFQGVQLD      |                 |                    | SRPFFQGVQLD    | 11.1          | Consensus     | SRPFFQGVQLD     |                |                   | SRPFFQGVQLD   |      |
| 12.1    | Consensus   | 1              | EELRLAPITSD    |          |              | EELRLAPITSD  | EELRLAPITSD       | 12.1           | Consensus      | EELRLAPITSD      |                 |                    | EELRLAPITSD    | 12.1          | Consensus     | EELRLAPITSD     |                |                   | EELRLAPITSD   |      |
| 13.1    | Consensus   | 1              | EEASTGRGLD     |          |              | EEASTGRGLD   | EEASTGRGLD        | 13.1           | Consensus      | EEASTGRGLD       |                 |                    | EEASTGRGLD     | 13.1          | Consensus     | EEASTGRGLD      |                |                   | EEASTGRGLD    |      |
| 14.1    | Consensus   | 1              | ENSLGFKFRKE    |          |              | ENSLGFKFRKE  | ENSLGFKFRKE       | 14.1           | Consensus      | ENSLGFKFRKE      |                 |                    | ENSLGFKFRKE    | 14.1          | Consensus     | ENSLGFKFRKE     |                |                   | ENSLGFKFRKE   |      |
| 15.1    | Consensus   | 1              | DKEKFAEALQ     |          |              | DKEKFAEALQ   | DKEKFAEALQ        | 15.1           | Consensus      | DKEKFAEALQ       |                 |                    | DKEKFAEALQ     | 15.1          | Consensus     | DKEKFAEALQ      |                |                   | DKEKFAEALQ    |      |
| 16.1    | Consensus   | 1              | NLDVAKLNGD     |          |              | NLDVAKLNGD   | NLDVAKLNGD        | 16.1           | Consensus      | NLDVAKLNGD       |                 |                    | NLDVAKLNGD     | 16.1          | Consensus     | NLDVAKLNGD      |                |                   | NLDVAKLNGD    |      |
| 17.1    | Consensus   | 1              | GIYYLVYDGFN    |          |              | GIYYLVYDGFN  | GIYYLVYDGFN       | 17.1           | Consensus      | GIYYLVYDGFN      |                 |                    | GIYYLVYDGFN    | 17.1          | Consensus     | GIYYLVYDGFN     |                |                   | GIYYLVYDGFN   |      |
| 18.1    | Consensus   | 1              | KTPDEGYEVE     |          |              | KTPDEGYEVE   | KTPDEGYEVE        | 18.1           | Consensus      | KTPDEGYEVE       |                 |                    | KTPDEGYEVE     | 18.1          | Consensus     | KTPDEGYEVE      |                |                   | KTPDEGYEVE    |      |
| 19.1    | Consensus   | 1              | LCFAGHTFRON    |          |              | LCFAGHTFRON  | LCFAGHTFRON       | 19.1           | Consensus      | LCFAGHTFRON      |                 |                    | LCFAGHTFRON    | 19.1          | Consensus     | LCFAGHTFRON     |                |                   | LCFAGHTFRON   |      |
| 20.1    | Consensus   | 1              | FTTLTKTDYDR    |          |              | FTTLTKTDYDR  | FTTLTKTDYDR       | 20.1           | Consensus      | FTTLTKTDYDR      |                 |                    | FTTLTKTDYDR    | 20.1          | Consensus     | FTTLTKTDYDR     |                |                   | FTTLTKTDYDR   |      |
| 21.1    | Consensus   | 1              | RELVVAVKTEP    |          |              | RELVVAVKTEP  | RELVVAVKTEP       | 21.1           | Consensus      | RELVVAVKTEP      |                 |                    | RELVVAVKTEP    | 21.1          | Consensus     | RELVVAVKTEP     |                |                   | RELVVAVKTEP   |      |
| 22.1    | Consensus   | 1              | RIKENGECRELY   |          |              | RIKENGECRELY | RIKENGECRELY      | 22.1           | Consensus      | RIKENGECRELY     |                 |                    | RIKENGECRELY   | 22.1          | Consensus     | RIKENGECRELY    |                |                   | RIKENGECRELY  |      |
| 23.1    | Consensus   | 1              | ASMKRKEGEG     |          |              | ASMKRKEGEG   | ASMKRKEGEG        | 23.1           | Consensus      | ASMKRKEGEG       |                 |                    | ASMKRKEGEG     | 23.1          | Consensus     | ASMKRKEGEG      |                |                   | ASMKRKEGEG    |      |
| 24.1    | Consensus   | 1              | EALVSVYVRG     |          |              | EALVSVYVRG   | EALVSVYVRG        | 24.1           | Consensus      | EALVSVYVRG       |                 |                    | EALVSVYVRG     | 24.1          | Consensus     | EALVSVYVRG      |                |                   | EALVSVYVRG    |      |
| 25.1    | Consensus   | 1              | DDVASEALNS     |          |              | DDVASEALNS   | DDVASEALNS        | 25.1           | Consensus      | DDVASEALNS       |                 |                    | DDVASEALNS     | 25.1          | Consensus     | DDVASEALNS      |                |                   | DDVASEALNS    |      |
| 26.1    | Consensus   | 1              | ILGLKVDHYQLR   |          |              | ILGLKVDHYQLR | ILGLKVDHYQLR      | 26.1           | Consensus      | ILGLKVDHYQLR     |                 |                    | ILGLKVDHYQLR   | 26.1          | Consensus     | ILGLKVDHYQLR    |                |                   | ILGLKVDHYQLR  |      |
| 27.1    | Consensus   | 1              | IGGPDGQVTPP    |          |              | IGGPDGQVTPP  | IGGPDGQVTPP       | 27.1           | Consensus      | IGGPDGQVTPP      |                 |                    | IGGPDGQVTPP    | 27.1          | Consensus     | IGGPDGQVTPP     |                |                   | IGGPDGQVTPP   |      |
| 28.1    | Consensus   | 1              | DNETLSLEELKA   |          |              | DNETLSLEELKA | DNETLSLEELKA      | 28.1           | Consensus      | DNETLSLEELKA     |                 |                    | DNETLSLEELKA   | 28.1          | Consensus     | DNETLSLEELKA    |                |                   | DNETLSLEELKA  |      |
| 29.1    | Consensus   | 1              | LQSGPYSLSVY    |          |              | LQSGPYSLSVY  | LQSGPYSLSVY       | 29.1           | Consensus      | LQSGPYSLSVY      |                 |                    | LQSGPYSLSVY    | 29.1          | Consensus     | LQSGPYSLSVY     |                |                   | LQSGPYSLSVY   |      |
| 30.1    | Consensus   | 1              | TFISFLSVLCY    |          |              | TFISFLSVLCY  | TFISFLSVLCY       | 30.1           | Consensus      | TFISFLSVLCY      |                 |                    | TFISFLSVLCY    | 30.1          | Consensus     | TFISFLSVLCY     |                |                   | TFISFLSVLCY   |      |
